# Supplementary material for: Two-step regulation of centromere distribution by condensin II and the nuclear envelope proteins
Source: Research Square preprint supplement (doi:10.21203/rs.3.rs-793150/v1), 2021-09-30
Supplement: Supplementary file 3 [file 018ecd4721dbf9102da602ef.xlsx]

## Sheet: expression
AGI	Annotation	strand (1:+, 0:-)	chromosome	start	end	Col_rep1	Col_rep2	Col_rep3	cap-h2_rep1	cap-h2_rep2	cap-h2_rep3	crwn1/4_rep1	crwn1/4_rep2	crwn1/4_rep3	Col_ave	cap-h2_ave	crwn1/4_ave	(cap-h2)-(Col)	p-value	FDR	(crwn1/4)-(Col)	p-value	FDR	cap-h2_DEG	crwn1/4_DEG
AT1G01010	NAC domain containing protein 1	1	chr1	3631	5899	8.14787	7.93353	7.86554	8.1515	8.1252	8.11009	8.20241	8.31388	8.4807	7.98231	8.12893	8.33233	0.146617	0.225221	0.318278	0.350017	0.040788	0.199302
AT1G01020	Arv1-like protein	0	chr1	5928	8737	9.43146	9.40228	9.50625	9.54614	9.53647	9.5111	9.41739	9.4491	9.55606	9.44666	9.53124	9.47419	0.0845742	0.0997851	0.242673	0.0275247	0.627767	0.452537
CUFF.7		0	chr1	10002	10920	5.0057	5.027	5.19266	4.94785	5.18004	5.22741	4.98766	4.74077	5.17201	5.07512	5.11843	4.96681	0.0433118	0.702846	0.507127	-0.108308	0.493076	0.407101
AT1G01030	AP2/B3-like transcriptional factor family protein	0	chr1	11649	13714	5.86968	6.30934	6.30831	6.17434	6.01054	5.92617	5.95257	5.56694	6.21076	6.16244	6.03702	5.91009	-0.125425	0.500032	0.438594	-0.252354	0.351136	0.354106
AT_1_-_0_14247-14375		0	chr1	14247	14375	5.75264	5.6378	5.86933	5.32178	5.5008	5.58646	5.73448	5.46761	5.45972	5.75326	5.46968	5.55394	-0.283576	0.0521092	0.202006	-0.199318	0.156798	0.267088
OMATPNEWGENE_1M_2615-200		0	chr1	19649	19858	5.31484	5.28557	5.43957	4.83612	5.13844	5.21949	5.32068	5.05102	4.98956	5.34666	5.06468	5.12042	-0.281978	0.123027	0.25924	-0.226237	0.142609	0.259682
AT1G01040	dicer-like 1	1	chr1	23146	31227	9.90562	9.89581	9.94532	10.0519	9.97945	10.0867	9.97751	9.96978	10.0165	9.91558	10.0393	9.98794	0.123758	0.0412718	0.188829	0.0723588	0.0260053	0.187915
AT1G01046	MIR838a; miRNA	1	chr1	28500	28706	5.09645	4.8613	4.99112	5.1352	4.88394	5.10538	5.10674	5.10697	5.26659	4.98296	5.04151	5.1601	0.0585483	0.605611	0.476028	0.177138	0.113595	0.242558
AT1G01050	pyrophosphorylase 1	0	chr1	31170	33153	12.2252	12.2688	12.3803	12.271	12.209	12.3295	12.286	12.2633	12.0576	12.2914	12.2699	12.2023	-0.0215724	0.729307	0.51538	-0.0891506	0.36843	0.361306
AT1G01060	Homeodomain-like superfamily protein	0	chr1	33379	37871	7.57863	7.67442	7.6893	7.33546	7.31595	7.13965	7.59516	7.77407	7.71667	7.64745	7.26369	7.6953	-0.383763	0.0112291	0.136967	0.04785	0.496772	0.408322
AT1G01070	nodulin MtN21 /EamA-like transporter family protein	0	chr1	38752	40944	9.29721	9.03012	9.41917	9.17093	9.1748	9.20175	9.3363	9.19522	9.32286	9.24883	9.18249	9.28479	-0.0663376	0.622424	0.481177	0.0359616	0.792355	0.502634
AT1G01073		1	chr1	44677	44787	7.36427	7.10421	7.30922	6.88119	7.03551	7.14403	6.90934	6.63467	6.6989	7.25923	7.02024	6.74764	-0.238988	0.0953895	0.239008	-0.511592	0.0111931	0.170524
AT1G01080	RNA-binding (RRM/RBD/RNP motifs) family protein	0	chr1	45296	47019	7.06079	6.78542	6.86081	7.09784	6.95525	6.96884	6.87706	7.20622	7.24652	6.90234	7.00731	7.10994	0.104966	0.342217	0.374697	0.207595	0.227999	0.30197
AT1G01090	pyruvate dehydrogenase E1 alpha	0	chr1	47485	49286	12.0967	12.3751	12.4539	12.0057	11.9399	12.0089	12.2827	12.2617	11.9341	12.3086	11.9848	12.1595	-0.323709	0.0904904	0.234597	-0.149056	0.394847	0.371495
AT1G01100	60S acidic ribosomal protein family	0	chr1	50075	51199	14.7512	14.6379	14.81	14.6031	14.5444	14.7035	14.7076	14.7608	14.4488	14.733	14.617	14.6391	-0.11603	0.166597	0.287386	-0.0939632	0.450821	0.392106
AT1G01110	IQ-domain 18	1	chr1	52239	54692	8.21695	8.32907	8.34583	7.83842	7.97446	8.14844	8.15908	8.30971	8.00398	8.29728	7.98711	8.15759	-0.310176	0.0567525	0.206439	-0.139695	0.25177	0.312668
AT1G01115		1	chr1	56624	56740	5.81571	5.76219	5.59954	5.57127	5.57482	5.01674	6.81722	6.40808	5.09522	5.72581	5.38761	6.10684	-0.338205	0.202347	0.306229	0.381028	0.540357	0.423666
AT1G01120	3-ketoacyl-CoA synthase 1	0	chr1	57269	59167	11.038	10.9304	10.8137	10.8826	10.8919	10.8731	11.1082	11.1448	11.3626	10.9274	10.8825	11.2052	-0.0448245	0.56091	0.460319	0.277874	0.0557957	0.209653
AT1G01130		0	chr1	61905	63811	6.48992	6.50342	6.41509	6.56504	6.47718	6.35108	6.4865	6.7861	6.56956	6.46948	6.46443	6.61406	-0.00504142	0.945871	0.575749	0.14458	0.242317	0.308445
AT1G01140	CBL-interacting protein kinase 9	0	chr1	64166	67625	6.76842	6.68538	6.58204	6.85778	6.65503	6.5381	6.80075	6.74337	7.03793	6.67861	6.68364	6.86068	0.00502182	0.96561	0.580952	0.18207	0.173908	0.276289
AT1G01150	Homeodomain-like protein with RING/FYVE/PHD-type zinc finger domain	0	chr1	70115	72138	5.07641	5.00132	5.02922	5.18477	6.38748	5.28362	5.26933	5.64781	5.05854	5.03565	5.61862	5.32523	0.582973	0.269387	0.340983	0.289574	0.233675	0.304233
AT1G01160	GRF1-interacting factor 2	1	chr1	72339	74096	9.30818	9.33312	9.35293	9.43845	9.40886	9.42205	9.26977	9.38404	9.2933	9.33141	9.42312	9.3157	0.0917123	0.00635494	0.12094	-0.0157068	0.705722	0.477797
AT1G01170	Protein of unknown function (DUF1138)	0	chr1	73931	74737	7.64793	7.31945	7.69116	7.83131	7.82995	7.78303	7.49619	7.6395	7.67029	7.55285	7.81476	7.602	0.261918	0.153035	0.278447	0.0491488	0.730336	0.484905
AT1G01180	S-adenosyl-L-methionine-dependent methyltransferases superfamily protein	1	chr1	75583	76758	10.0822	10.0345	9.69115	10.284	10.2919	10.3236	10.2849	10.2542	10.1998	9.93594	10.2998	10.2463	0.363882	0.0966289	0.239978	0.310328	0.122803	0.247839
CUFF.81		0	chr1	77385	78328	5.55594	5.49155	5.73938	5.44318	5.37208	5.5109	5.97352	5.44879	5.46144	5.59562	5.44205	5.62792	-0.153573	0.164051	0.286016	0.0322919	0.875691	0.526187
AT_1_-_2_78181-78321		0	chr1	78181	78321	7.8153	8.06216	8.14658	7.87114	7.60885	7.82662	7.50755	7.55578	7.20263	8.00801	7.76887	7.42199	-0.239141	0.138538	0.270404	-0.586024	0.0173025	0.177797
AT1G01183	MIR165/MIR165A; miRNA	0	chr1	78932	79032	5.13316	5.34432	5.15458	4.72231	4.99743	4.72976	5.06061	5.00044	5.41296	5.21069	4.8165	5.158	-0.394187	0.0284115	0.17086	-0.0526817	0.740538	0.488127
CUFF.85		1	chr1	79560	79961	5.03259	5.05664	4.98459	5.35551	4.92398	4.57627	5.56472	4.59788	4.97739	5.02461	4.95192	5.04666	-0.0726862	0.778121	0.530555	0.0220567	0.944714	0.544947
CUFF.87		1	chr1	80076	80403	4.97808	5.25986	4.97834	4.91333	4.98232	5.19025	5.10433	5.03859	4.76572	5.0721	5.02863	4.96955	-0.0434628	0.746718	0.520662	-0.102547	0.504449	0.411032
CUFF.89		1	chr1	80504	81321	5.82217	5.69251	5.92428	5.81409	5.74732	5.54581	5.76458	5.68911	5.82213	5.81299	5.70241	5.75861	-0.11058	0.353019	0.379047	-0.0543793	0.529837	0.420393
AT_1_-_2_80593-80688		0	chr1	80593	80688	5.54519	5.5753	5.53594	5.16831	5.03259	5.38224	5.18582	5.03256	5.27391	5.55214	5.19438	5.1641	-0.357763	0.070363	0.219346	-0.388045	0.0286086	0.189174
AT_1_+_0_82621-82713		1	chr1	82621	82713	4.80359	4.85593	4.86315	5.68796	5.21634	4.9538	4.59115	4.92497	4.8387	4.84089	5.28603	4.78494	0.445143	0.173056	0.290341	-0.0559487	0.63453	0.455064
AT1G01190	cytochrome P450, family 78, subfamily A, polypeptide 8	0	chr1	83045	84864	11.7553	11.8415	12.1526	12.0165	11.6895	11.8161	11.5053	11.7163	11.4307	11.9165	11.8407	11.5508	-0.0757759	0.649114	0.490104	-0.365674	0.0756474	0.221753
AT1G01200	RAB GTPase homolog A3	0	chr1	86515	88213	8.06266	8.18504	8.0097	8.01022	7.99863	7.95818	8.19961	8.05926	8.19355	8.0858	7.98901	8.1508	-0.0967888	0.196545	0.303224	0.065005	0.401754	0.374445
AT1G01210	DNA-directed RNA polymerase, subunit M, archaeal	1	chr1	88898	89745	5.69873	6.06018	6.01411	5.39081	5.46459	5.37964	5.54064	5.3103	5.72107	5.92434	5.41168	5.524	-0.512662	0.0396738	0.186799	-0.400336	0.0717321	0.219473
AT_1_-_1_90227-90406		0	chr1	90227	90406	6.6997	6.45055	6.6604	6.19459	6.4171	6.31476	6.49073	6.10242	6.46866	6.60355	6.30882	6.35394	-0.294731	0.0445544	0.192821	-0.249611	0.180882	0.279197
AT1G01220	L-fucokinase/GDP-L-fucose pyrophosphorylase	1	chr1	91376	95651	9.68103	9.90928	10.0263	9.76037	9.75554	9.84513	9.97025	9.9417	9.79066	9.8722	9.78701	9.90087	-0.0851875	0.493529	0.436115	0.028673	0.819721	0.510287
AT1G01225	NC domain-containing protein-related	1	chr1	95987	97407	8.07877	7.94695	7.95727	7.97446	7.9069	8.00853	7.86856	7.9968	7.82951	7.99433	7.9633	7.89829	-0.0310322	0.584797	0.469073	-0.0960385	0.220939	0.29871
AT1G01230	ORMDL family protein	1	chr1	97456	99240	10.6825	10.5716	10.6705	10.802	10.6419	10.804	10.7919	10.8435	10.8408	10.6415	10.7493	10.8254	0.107778	0.179688	0.293931	0.183855	0.0199275	0.181995
AT1G01240		1	chr1	99894	101834	11.0749	10.981	10.9624	11.0442	11.1657	11.1505	11.1625	11.2062	11.119	11.0061	11.1201	11.1626	0.114023	0.0926279	0.237095	0.156461	0.0257235	0.187915
AT1G01250	Integrase-type DNA-binding superfamily protein	0	chr1	104491	105330	4.94938	4.75635	4.7045	4.76108	5.14915	4.26991	4.42831	4.81188	4.45182	4.80341	4.72671	4.56401	-0.0766965	0.795988	0.535379	-0.239404	0.189056	0.284215
AT1G01260	basic helix-loop-helix (bHLH) DNA-binding superfamily protein	1	chr1	108946	111609	8.45436	8.51498	8.52636	8.26737	8.36716	8.4596	8.26214	8.47468	8.42064	8.49857	8.36471	8.38582	-0.133858	0.123651	0.25965	-0.112748	0.212369	0.294316
AT1G01270	pre-tRNA	0	chr1	111890	111961	8.03864	7.45832	6.94268	7.7945	7.8524	6.19552	7.32341	6.0191	7.91178	7.47988	7.2808	7.08476	-0.199073	0.770864	0.528568	-0.395113	0.580083	0.43622
AT1G01280	cytochrome P450, family 703, subfamily A, polypeptide 2	1	chr1	112263	113947	4.95494	4.77739	4.81178	4.4949	4.81337	5.01576	4.92909	4.96692	4.56308	4.84804	4.77468	4.8197	-0.0733576	0.685258	0.501357	-0.0283393	0.853677	0.519886
AT1G01290	cofactor of nitrate reductase and xanthine dehydrogenase 3	1	chr1	114286	116108	10.2921	10.1762	10.2256	10.2648	10.2178	10.3266	10.2077	10.1399	9.9417	10.2313	10.2697	10.0964	0.0384254	0.45114	0.419728	-0.134856	0.227509	0.301689
AT1G01300	Eukaryotic aspartyl protease family protein	1	chr1	116943	118764	9.96919	10.208	10.2566	9.896	9.74402	9.84273	9.9407	9.84075	9.64626	10.1446	9.82758	9.80924	-0.31701	0.050958	0.200649	-0.335354	0.0538122	0.207673
AT1G01305		1	chr1	119397	119997	4.42999	4.29418	4.43166	4.52679	4.35281	4.56059	4.16232	4.7315	4.32772	4.38528	4.48007	4.40718	0.0947889	0.302391	0.3565	0.0219031	0.910579	0.535803
AT1G01310	CAP (Cysteine-rich secretory proteins, Antigen 5, and Pathogenesis-related 1 protein) superfamily protein	1	chr1	120154	121130	6.9947	6.79406	6.67882	6.96123	7.20865	6.84181	7.27142	7.28718	7.6864	6.82253	7.0039	7.415	0.181371	0.272395	0.342384	0.592472	0.0279881	0.188548
AT1G01320	Tetratricopeptide repeat (TPR)-like superfamily protein	0	chr1	121067	130577	6.30884	6.26946	6.58684	6.33055	6.38869	6.17139	6.20537	6.37569	6.34904	6.38838	6.29688	6.31004	-0.0915016	0.491843	0.435335	-0.0783429	0.537442	0.422826
AT_1_+_2_131151-131312		1	chr1	131151	131312	5.5539	5.13911	5.58941	5.38058	5.84169	5.27434	5.66847	5.32876	5.31628	5.42747	5.49887	5.43783	0.0713942	0.768684	0.527854	0.0103597	0.958141	0.548148
AT1G01340	cyclic nucleotide gated channel 10	0	chr1	132328	135831	9.95106	9.89774	9.58036	9.8863	9.91387	9.79865	9.86803	9.90221	10.0942	9.80972	9.86627	9.95481	0.0565515	0.679487	0.499991	0.145086	0.356031	0.355945
AT1G01350	Zinc finger (CCCH-type/C3HC4-type RING finger) family protein	1	chr1	136124	138162	9.86618	9.91682	9.8475	9.98442	9.92823	9.8483	9.93049	10.0161	10.1133	9.87683	9.92032	10.0199	0.0434846	0.400936	0.399183	0.143111	0.0987978	0.235086
AT1G01355	Putative endonuclease or glycosyl hydrolase	1	chr1	138513	139568	5.14451	5.25227	5.16179	5.46266	5.38527	4.78409	5.07309	5.62696	5.41498	5.18619	5.21067	5.37168	0.0244837	0.920064	0.569535	0.18549	0.369262	0.361675
AT_1_+_1_141395-141511		1	chr1	141395	141511	4.79015	4.65857	4.59703	4.45623	4.62237	4.94444	4.80028	4.89576	4.52086	4.68191	4.67435	4.73897	-0.00756809	0.964359	0.580472	0.0570505	0.681997	0.470312
AT1G01360	regulatory component of ABA receptor 1	1	chr1	141971	143183	11.5082	11.4144	11.3679	11.6402	11.6206	11.63	11.4548	11.608	11.7769	11.4302	11.6303	11.6132	0.200089	0.0378017	0.184368	0.183015	0.177927	0.277772
AT1G01370	Histone superfamily protein	1	chr1	143564	145684	8.57465	8.64219	8.56537	8.24335	8.41285	8.35029	8.41161	8.62143	8.39028	8.59407	8.33549	8.47444	-0.258575	0.0196366	0.156017	-0.119629	0.241495	0.308101
AT1G01380	Homeodomain-like superfamily protein	1	chr1	147153	147942	8.42166	8.92932	8.83077	8.58302	8.16427	8.80528	8.86123	8.8123	9.04324	8.72725	8.51752	8.90559	-0.209726	0.439865	0.414584	0.178343	0.377887	0.365469
AT1G01390	UDP-Glycosyltransferase superfamily protein	0	chr1	148120	149806	5.14998	5.26774	5.28704	5.16224	4.83664	5.06399	5.24058	4.86533	5.05997	5.23492	5.02096	5.05529	-0.213961	0.143528	0.273388	-0.179625	0.233898	0.304291
AT1G01400		0	chr1	150689	152210	5.12333	4.82441	4.71056	4.81898	4.54032	4.96107	4.99212	4.90864	5.14145	4.8861	4.77346	5.01407	-0.112641	0.553573	0.457623	0.127971	0.427684	0.383472
AT1G01410	pumilio 22	1	chr1	153113	154198	5.14282	5.14666	4.79285	4.80348	4.93042	5.33244	5.07105	5.07357	5.32266	5.02744	5.02211	5.15576	-0.00532914	0.979919	0.584358	0.128315	0.42814	0.383547
AT1G01420	UDP-glucosyl transferase 72B3	0	chr1	154492	156011	7.39716	7.31278	7.36643	7.34822	7.23014	7.00401	7.32797	7.43224	7.24015	7.35879	7.19412	7.33346	-0.164666	0.240893	0.326096	-0.025332	0.706975	0.478141
AT1G01430	TRICHOME BIREFRINGENCE-LIKE 25	0	chr1	156801	158655	10.4602	10.6453	10.5783	10.5426	10.507	10.5643	10.3728	10.3102	10.2083	10.5613	10.538	10.2971	-0.0232489	0.715461	0.510982	-0.264124	0.0222403	0.183984
AT1G01440	Protein of unknown function (DUF3133)	0	chr1	159856	162572	9.27453	9.30659	9.2133	9.28757	9.32551	9.27955	9.2081	9.16567	9.27453	9.26481	9.29754	9.2161	0.0327388	0.366002	0.384592	-0.0487024	0.310595	0.337701
AT1G01448	other RNA	1	chr1	163419	166239	6.37665	6.60915	6.56553	6.29736	6.61201	6.3493	6.49024	6.38443	6.54962	6.51711	6.41956	6.47476	-0.0975502	0.468221	0.425839	-0.0423461	0.652189	0.460671
AT1G01450	Protein kinase superfamily protein	0	chr1	164105	165517	4.6896	4.77168	5.20374	5.03557	5.19346	5.01092	5.25671	4.99124	5.18333	4.88834	5.07998	5.14376	0.191644	0.354523	0.379747	0.255419	0.248948	0.311148
AT1G01453		0	chr1	166589	167842	9.16435	9.16053	8.74517	9.00192	8.91099	9.08468	9.07554	9.20592	9.08751	9.02335	8.9992	9.12299	-0.0241515	0.882484	0.559653	0.0996443	0.553876	0.428092
AT_1_+_1_168227-168373		1	chr1	168227	168373	6.28553	5.96107	6.27704	5.72269	5.58729	5.92909	5.71459	5.68811	6.25995	6.17455	5.74635	5.88755	-0.428192	0.0428428	0.190947	-0.286997	0.268909	0.3204
AT1G01460	Phosphatidylinositol-4-phosphate 5-kinase, core	1	chr1	168723	171165	5.20077	5.27163	5.22116	5.13772	5.0263	5.17934	4.76238	4.7067	4.97704	5.23119	5.11445	4.81537	-0.116731	0.10885	0.24933	-0.415811	0.0306708	0.190582
AT1G01470	Late embryogenesis abundant protein	0	chr1	172146	172948	12.6162	12.638	12.8221	12.6792	12.6126	12.6328	12.8044	12.8258	12.7801	12.6921	12.6415	12.8034	-0.0505575	0.525219	0.447477	0.111319	0.227204	0.301498
AT1G01471		1	chr1	173251	173466	5.18662	4.65475	5.09498	4.92044	5.18004	5.04508	5.44043	4.98435	5.05997	4.97878	5.04852	5.16158	0.0697362	0.726664	0.51457	0.182799	0.446983	0.390789
AT1G01480	1-amino-cyclopropane-1-carboxylate synthase 2	1	chr1	175782	178400	7.43605	7.73145	7.11955	7.81863	7.86576	7.7426	7.52561	7.77929	7.8705	7.42902	7.809	7.72513	0.37998	0.159832	0.283522	0.296115	0.2376	0.3061
AT1G01490	Heavy metal transport/detoxification superfamily protein	0	chr1	180059	182358	11.5866	11.5677	11.514	11.6305	11.6365	11.6419	11.4915	11.5225	11.4871	11.5561	11.6363	11.5004	0.080209	0.0630995	0.212283	-0.0557598	0.107044	0.24072
AT1G01500	Erythronate-4-phosphate dehydrogenase family protein	1	chr1	185133	186923	7.95006	7.66933	7.75546	7.90526	7.85459	7.9467	7.85172	8.10766	8.0015	7.79162	7.90218	7.98696	0.110567	0.313578	0.361704	0.195346	0.15521	0.266473
AT1G01510	NAD(P)-binding Rossmann-fold superfamily protein	1	chr1	187211	190056	9.78755	9.7988	9.99155	9.62977	9.77831	9.74819	9.68103	9.77058	9.84135	9.8593	9.71876	9.76432	-0.140544	0.164034	0.286016	-0.0949825	0.312154	0.338433
AT1G01520	Homeodomain-like superfamily protein	1	chr1	190596	192139	5.16778	5.26149	5.32762	5.47802	5.29446	5.5755	5.05173	5.26893	5.43107	5.2523	5.44933	5.25058	0.19703	0.124128	0.260038	-0.00171841	0.989506	0.55569
AT1G01530	AGAMOUS-like 28	0	chr1	192640	193670	5.41159	5.0928	5.47917	4.93789	5.18187	5.01485	5.23421	5.004	4.9008	5.32785	5.04487	5.04634	-0.282984	0.126909	0.262038	-0.281514	0.145261	0.260846
AT1G01540	Protein kinase superfamily protein	1	chr1	195780	198684	9.03273	9.04202	9.09597	9.03273	9.12796	9.10612	8.94396	9.01755	8.99913	9.05691	9.08894	8.98688	0.0320309	0.416969	0.405442	-0.0700306	0.078157	0.223236
AT1G01550	Protein of unknown function (DUF793)	1	chr1	199639	201775	13.1704	13.1897	13.0969	13.3514	13.3744	13.4177	13.3641	13.3299	13.5776	13.1523	13.3812	13.4239	0.228855	0.00399371	0.108644	0.271561	0.0589294	0.211733
AT1G01560	MAP kinase 11	1	chr1	202136	204335	6.65158	6.47651	6.30535	6.0047	6.33216	6.13186	6.43847	6.63565	6.61116	6.47781	6.15624	6.56176	-0.321573	0.0805411	0.227245	0.0839456	0.522126	0.418052
AT1G01570	Protein of unknown function (DUF604)	1	chr1	205176	207435	6.91539	7.05385	6.84454	6.93475	6.89039	6.84223	6.87467	7.11855	7.03205	6.93793	6.88912	7.00842	-0.0488019	0.523928	0.44692	0.0704975	0.496688	0.408286
AT_1_-_2_207796-207999		0	chr1	207796	207999	5.20511	5.3742	5.02808	5.27618	5.31419	5.09997	5.15892	5.32659	5.18531	5.20246	5.23011	5.2236	0.0276529	0.83035	0.545135	0.0211426	0.863083	0.522651
AT1G01580	ferric reduction oxidase 2	1	chr1	209395	213041	11.1251	10.8163	11.6415	10.2981	10.2858	10.3869	10.8592	11.0639	10.7371	11.1943	10.3236	10.8867	-0.870677	0.0662769	0.215358	-0.307558	0.331627	0.345676
AT1G01590	ferric reduction oxidase 1	1	chr1	214229	217304	5.80451	5.82622	6.04746	5.98556	5.51938	5.68783	5.82654	5.46553	6.09011	5.89273	5.73092	5.79406	-0.161807	0.374336	0.387863	-0.0986692	0.654221	0.461401
AT1G01600	cytochrome P450, family 86, subfamily A, polypeptide 4	1	chr1	218994	221286	8.80742	9.0992	8.76859	8.59479	8.61082	8.54851	9.06714	9.22427	9.02347	8.89174	8.58471	9.10496	-0.307031	0.0943265	0.238053	0.213222	0.169449	0.273628
AT1G01610	glycerol-3-phosphate acyltransferase 4	0	chr1	221691	224340	9.44473	9.53162	9.37495	9.11938	9.00034	9.15755	9.56854	9.64875	9.49747	9.45043	9.09242	9.57159	-0.358013	0.00548914	0.115824	0.121153	0.126709	0.250605
AT1G01620	plasma membrane intrinsic protein 1C	0	chr1	225665	227302	10.9707	10.7131	10.6573	10.8654	10.8071	10.7853	10.6407	10.8079	11.0429	10.7804	10.8193	10.8305	0.0389132	0.729648	0.515523	0.050138	0.757715	0.493318
AT1G01630	Sec14p-like phosphatidylinositol transfer family protein	1	chr1	229013	230917	7.46819	7.46303	7.42728	7.46834	7.45824	7.47412	7.64731	7.48618	7.4698	7.45283	7.4669	7.53443	0.0140687	0.392281	0.395814	0.0815964	0.284343	0.327108
AT1G01640	BTB/POZ domain-containing protein	0	chr1	230994	232508	11.3067	11.1186	11.1052	11.6752	11.7182	11.7172	11.3096	11.3821	11.374	11.1768	11.7035	11.3552	0.526732	0.0119422	0.139608	0.178437	0.0982393	0.234813
AT1G01650	SIGNAL PEPTIDE PEPTIDASE-LIKE 4	0	chr1	232841	237817	9.18491	9.16898	9.26674	9.05687	9.0269	8.93661	9.05182	8.90404	8.86434	9.20688	9.0068	8.94007	-0.200079	0.0141058	0.144102	-0.266808	0.0250054	0.187338
AT1G01660	RING/U-box superfamily protein	0	chr1	240057	242608	8.02595	7.87252	7.53716	7.68657	7.78116	7.83861	7.68572	7.7875	7.74086	7.81188	7.76878	7.73802	-0.043096	0.798326	0.536178	-0.0738536	0.66244	0.463657
AT1G01670	RING/U-box superfamily protein	0	chr1	242843	245988	7.40049	7.31157	7.35628	7.40898	7.52032	7.44086	7.13769	7.36364	7.38949	7.35611	7.45672	7.29694	0.100606	0.0781986	0.225255	-0.0591752	0.543056	0.424375
AT1G01680	plant U-box 54	0	chr1	246411	248367	5.82965	5.95667	6.05658	5.88057	5.78077	6.07372	5.59993	5.61147	5.73428	5.94763	5.91169	5.64856	-0.0359469	0.75748	0.524207	-0.299072	0.0248063	0.186999
AT1G01690	putative recombination initiation defects 3	1	chr1	249141	252462	7.1828	7.62639	7.44467	7.31914	7.22782	7.25896	7.47721	7.61234	7.32885	7.41795	7.26864	7.4728	-0.149314	0.365875	0.384496	0.0548477	0.740477	0.488118
AT1G01695	Phosphatidylinositol N-acetyglucosaminlytransferase subunit P-related	1	chr1	252947	254495	6.23818	6.10534	6.18615	6.27393	6.15112	6.15816	5.87965	5.90933	6.07387	6.17655	6.1944	5.95428	0.0178495	0.763805	0.526212	-0.222269	0.0450459	0.201569
AT1G01700	RHO guanyl-nucleotide exchange factor 2	0	chr1	259495	261474	5.89997	6.17101	5.98184	6.15147	6.18125	6.19286	5.98481	6.18199	5.9883	6.01761	6.17519	6.0517	0.157585	0.186059	0.297475	0.0340923	0.758767	0.49371
AT1G01710	Acyl-CoA thioesterase family protein	1	chr1	262828	267771	7.76946	7.86344	8.02781	7.89102	7.8153	7.83344	7.6631	7.79487	7.81081	7.8869	7.84659	7.75626	-0.0403188	0.653052	0.491493	-0.130643	0.228758	0.302255
AT1G01720	NAC (No Apical Meristem) domain transcriptional regulator superfamily protein	1	chr1	268330	269819	9.72669	9.54511	9.56854	9.64082	9.59632	9.56934	9.88274	9.78713	10.0562	9.61345	9.60216	9.90868	-0.0112914	0.86637	0.555596	0.295232	0.043482	0.200964
AT1G01725		0	chr1	269792	270775	9.58659	9.35153	9.30215	9.65058	9.72531	9.5887	9.53119	9.31538	9.43025	9.41342	9.65486	9.42561	0.241438	0.0937307	0.237546	0.0121831	0.915898	0.537126
AT1G01730		1	chr1	270956	272061	11.8962	11.8742	11.9047	12.0221	12.0109	12.065	11.8742	11.849	11.7929	11.8917	12.0327	11.8387	0.140998	0.00434192	0.112009	-0.0529743	0.146657	0.261361
AT1G01740	Protein kinase protein with tetratricopeptide repeat domain	0	chr1	272111	274569	7.70493	7.86647	7.9182	7.93481	7.8105	7.90635	7.77996	7.99222	7.84965	7.82987	7.88389	7.87394	0.0540196	0.517046	0.444994	0.0440787	0.648535	0.459455
AT1G01750	actin depolymerizing factor 11	1	chr1	275366	276310	11.6443	11.5338	11.2913	11.0903	11.1826	11.2028	11.4199	11.5717	11.2007	11.4898	11.1585	11.3974	-0.33126	0.0741923	0.222269	-0.0923834	0.571052	0.433684
AT1G01760	adenosine deaminases;RNA binding;RNA binding;adenosine deaminases	0	chr1	276266	278448	7.15641	6.85457	6.90585	6.98604	6.94622	6.96077	6.95159	6.99112	7.18083	6.97228	6.96434	7.04118	-0.0079333	0.940205	0.574361	0.0689042	0.589883	0.439381
AT1G01770		1	chr1	278615	282891	10.1162	10.0368	10.0368	9.96651	9.91511	10.0223	9.9575	9.94865	9.809	10.0632	9.96796	9.90505	-0.0952845	0.0809272	0.227598	-0.158197	0.0607612	0.213485
AT1G01780	GATA type zinc finger transcription factor family protein	1	chr1	282761	284245	7.41485	7.221	7.0521	7.16669	7.27026	7.17903	7.2184	7.04305	7.07043	7.22932	7.20533	7.11063	-0.0239854	0.844349	0.548962	-0.118691	0.388813	0.369299
AT1G01790	K+ efflux antiporter 1	1	chr1	284610	291094	6.81374	6.9291	6.78057	6.82029	6.79381	6.74445	6.85693	6.96069	7.15312	6.84114	6.78618	6.99025	-0.0549536	0.355625	0.380346	0.149112	0.22446	0.29992
AT1G01800	NAD(P)-binding Rossmann-fold superfamily protein	1	chr1	293342	295040	12.8713	12.9121	12.9955	13.1177	13.0646	13.1177	12.9378	12.9378	12.9184	12.9263	13.1	12.9313	0.173658	0.0253298	0.165932	0.00503181	0.903931	0.534099
AT1G01810		1	chr1	295221	295859	5.67612	5.61992	5.48817	6.05423	6.06832	6.06038	5.85728	5.76915	5.89513	5.59474	6.06098	5.84052	0.466237	0.013605	0.142498	0.245782	0.0271132	0.187915
AT1G01820	peroxin 11c	0	chr1	296001	298120	12.0657	11.9425	11.9563	12.2961	12.2466	12.3444	12.0521	12.1356	12.212	11.9882	12.2957	12.1332	0.307517	0.00420114	0.110828	0.145047	0.0761074	0.221948
AT1G01830	ARM repeat superfamily protein	0	chr1	298535	302315	6.83666	7.04857	7.01957	7.01232	7.07979	7.04775	6.91138	7.12219	7.17398	6.96827	7.04662	7.06918	0.0783503	0.359695	0.382018	0.100915	0.389299	0.369449
AT1G01840		1	chr1	303537	304358	5.29175	5.09805	5.20083	5.31996	5.28825	5.31832	5.06511	5.29577	5.41434	5.19687	5.30884	5.2584	0.111967	0.179765	0.294012	0.0615301	0.633779	0.454793
AT1G01860	Ribosomal RNA adenine dimethylase family protein	0	chr1	304133	306287	8.32044	8.46154	8.45708	8.4425	8.5767	8.56046	8.39129	8.50376	8.5381	8.41302	8.52655	8.47771	0.11353	0.14507	0.274094	0.0646918	0.370111	0.362061
AT1G01870	pre-tRNA	1	chr1	306384	306456	9.45859	9.07646	8.80034	8.99419	9.25751	8.36744	9.11906	8.25331	9.08607	9.1118	8.87305	8.81948	-0.238748	0.507959	0.441789	-0.292318	0.446596	0.390639
AT1G01880	5'-3' exonuclease family protein	0	chr1	306480	309109	5.91942	5.58975	5.78418	5.28984	5.45311	5.13392	5.4464	5.08042	5.7517	5.76445	5.29229	5.42617	-0.472165	0.023759	0.162803	-0.338282	0.218364	0.297335
AT1G01900	subtilase family protein	1	chr1	310316	313130	7.83861	7.98847	7.93767	7.99594	7.77422	8.0258	7.92739	7.94191	8.03757	7.92158	7.93199	7.96895	0.0104068	0.915667	0.568335	0.047373	0.447364	0.390841
AT1G01910	P-loop containing nucleoside triphosphate hydrolases superfamily protein	0	chr1	313101	315902	8.91978	8.7934	8.96712	8.74263	8.70158	8.79666	8.96037	8.91658	8.63629	8.89344	8.74695	8.83774	-0.146482	0.0868419	0.231958	-0.055693	0.658876	0.462696
AT1G01920	SET domain-containing protein	1	chr1	316128	319650	11.0011	11.0744	11.2318	10.9892	10.9487	11.0307	10.939	10.7919	10.5619	11.1024	10.9895	10.7642	-0.112893	0.233762	0.322304	-0.338177	0.0707547	0.218705
AT1G01930	zinc finger protein-related	0	chr1	319836	322860	8.59766	8.75001	8.81051	8.70644	8.60535	8.76349	8.78285	8.74903	8.88359	8.7194	8.69176	8.80516	-0.0276361	0.743836	0.519995	0.0857627	0.327623	0.3442
AT1G01940	Cyclophilin-like peptidyl-prolyl cis-trans isomerase family protein	1	chr1	323027	324917	9.38123	9.43288	9.42795	9.40346	9.55499	9.48357	9.4523	9.5618	9.53979	9.41402	9.48067	9.51796	0.0666501	0.264011	0.338266	0.103943	0.0707598	0.218705
AT1G01950	armadillo repeat kinesin 2	1	chr1	325379	330619	6.28008	6.70426	6.61189	6.6083	6.21689	6.58273	6.75737	6.69637	6.60614	6.53208	6.46931	6.68663	-0.0627677	0.745525	0.520347	0.154555	0.354534	0.355378
AT1G01960	SEC7-like guanine nucleotide exchange family protein	0	chr1	330588	337582	10.8201	11.0759	11.0665	10.8116	10.7072	10.8531	10.819	10.8659	10.67	10.9875	10.7906	10.785	-0.196904	0.128064	0.262647	-0.202552	0.127247	0.250738
AT1G01970	Tetratricopeptide repeat (TPR)-like superfamily protein	1	chr1	338291	340077	8.18872	8.23051	8.30009	8.21959	8.16947	8.1846	8.21802	8.28577	8.32504	8.23977	8.19122	8.27627	-0.0485501	0.27311	0.34269	0.0365017	0.463584	0.396272
AT1G01980	FAD-binding Berberine family protein	0	chr1	340172	341999	4.9998	5.13404	4.83071	5.19282	5.30316	4.90489	5.38698	5.32926	4.90291	4.98818	5.13362	5.20638	0.145439	0.384764	0.392588	0.218201	0.298575	0.332718
AT1G01990		0	chr1	343166	344341	7.91417	7.95704	7.9004	8.23706	8.24479	8.14898	8.05616	8.11337	8.26838	7.92387	8.21028	8.14597	0.286408	0.00331842	0.10522	0.2221	0.0640163	0.215202
AT1G02000	UDP-D-glucuronate 4-epimerase 2	1	chr1	345812	347592	8.2781	8.27769	8.11969	8.28331	8.3421	8.2788	8.52841	8.51513	8.22077	8.22516	8.3014	8.42143	0.0762447	0.283473	0.347882	0.196276	0.181186	0.279352
AT1G02010	secretory 1A	1	chr1	347891	352480	7.64491	7.73552	7.78899	7.63583	7.69615	7.73092	7.82753	7.75563	7.77642	7.72314	7.68763	7.78652	-0.0355095	0.525504	0.447529	0.0633835	0.272507	0.321999
AT1G02020	nitroreductase family protein	0	chr1	352637	354969	7.08319	7.1746	7.10123	7.31708	7.29223	7.30566	7.26239	7.55143	7.42123	7.11967	7.30499	7.41168	0.185318	0.0170486	0.150159	0.292012	0.0608801	0.213485
AT1G02030	C2H2-like zinc finger protein	0	chr1	355321	357258	6.83266	7.06212	6.85666	7.23405	7.04335	7.07812	7.02002	7.14931	7.22848	6.91715	7.11851	7.1326	0.20136	0.100684	0.243608	0.215458	0.0876838	0.229954
AT1G02040	C2H2-type zinc finger family protein	0	chr1	358104	359078	5.6153	5.72484	5.49838	5.56716	5.49592	5.36263	5.65739	5.83422	5.69985	5.61284	5.47524	5.73049	-0.137604	0.196298	0.303109	0.117646	0.238309	0.306487
AT1G02050	Chalcone and stilbene synthase family protein	0	chr1	359117	360518	8.59663	8.73708	8.82358	8.73247	8.82291	8.77738	8.47436	8.45108	8.45596	8.71909	8.77759	8.46047	0.0584915	0.479099	0.430131	-0.258625	0.0580519	0.210847
AT1G02060	Tetratricopeptide repeat (TPR)-like superfamily protein	0	chr1	360918	363094	5.73442	6.19009	6.24447	6.3231	6.0063	6.25012	6.10851	6.30388	6.02461	6.05632	6.19317	6.14567	0.13685	0.515506	0.444419	0.0893425	0.656788	0.462193
AT1G02065	squamosa promoter binding protein-like 8	1	chr1	365209	367340	4.57615	4.68824	4.71007	5.04447	4.66754	4.34684	4.20798	4.6064	4.61206	4.65815	4.68628	4.47548	0.0281309	0.902934	0.565175	-0.182669	0.303887	0.334982
AT_1_-_0_368163-368264		0	chr1	368163	368264	4.84976	4.96581	4.98365	5.0061	5.33124	4.96763	5.23726	5.57802	5.17321	4.93307	5.10166	5.3295	0.168584	0.278946	0.345627	0.396426	0.0751336	0.221623
AT1G02070		0	chr1	370257	370967	5.19873	5.52256	5.5832	5.6265	5.5812	5.84545	5.46398	5.47884	5.68024	5.43483	5.68438	5.54102	0.249553	0.168741	0.288362	0.106189	0.494714	0.407727
AT1G02074		1	chr1	372064	372210	5.50065	5.8593	5.89214	5.65015	5.30776	5.2245	5.44743	5.41338	5.49494	5.7507	5.39414	5.45192	-0.356561	0.119961	0.256831	-0.298782	0.135604	0.255033
AT1G02080	transcription regulators	1	chr1	373335	386847	11.9627	12.1811	12.1915	12.0291	11.962	12.0367	12.0367	11.993	11.8525	12.1117	12.0092	11.9607	-0.102508	0.301618	0.356321	-0.151	0.185625	0.28217
AT1G02090	Proteasome component (PCI) domain protein	0	chr1	387277	389647	10.6735	10.3925	10.5207	10.4629	10.5558	10.4447	10.3979	10.5345	10.4811	10.5289	10.4878	10.4712	-0.0410881	0.67632	0.498941	-0.0577007	0.570059	0.433385
AT1G02100	Leucine carboxyl methyltransferase	1	chr1	389812	392816	11.495	11.4894	11.51	11.7464	11.8093	11.7521	11.4769	11.5002	11.4369	11.4981	11.7692	11.4713	0.271102	0.00298592	0.104157	-0.0268021	0.281527	0.325961
AT1G02110	Protein of unknown function (DUF630 and DUF632)	1	chr1	392831	395528	10.4225	10.6551	10.8166	10.4323	10.2993	10.4456	10.3933	10.4365	10.1857	10.6314	10.3924	10.3385	-0.239019	0.160527	0.284098	-0.292915	0.110738	0.241942
AT1G02120	GRAM domain family protein	1	chr1	395761	399897	9.79258	9.77385	9.72195	9.89021	9.94576	9.92605	9.87325	9.91682	10.1382	9.76279	9.92067	9.97609	0.157878	0.00496378	0.113404	0.213298	0.113577	0.242558
AT1G02130	RAS 5	0	chr1	400035	401882	10.1053	10.1481	10.1274	10.2485	10.1274	10.2633	10.0657	10.1195	10.0466	10.1269	10.2131	10.0773	0.0861315	0.176077	0.291968	-0.0496707	0.136914	0.255816
AT1G02136		0	chr1	402693	402961	5.2698	5.23652	5.0928	5.04211	5.13328	5.11044	5.1002	5.91168	5.29586	5.19971	5.09528	5.43591	-0.104428	0.185897	0.297357	0.236206	0.437423	0.387057
AT1G02140	mago nashi family protein	0	chr1	403190	404456	11.7	11.6722	11.7544	11.8394	11.7806	11.8256	11.7501	11.7769	11.8702	11.7089	11.8152	11.7991	0.106381	0.0274367	0.169363	0.090215	0.118346	0.245147
AT1G02145	homolog of asparagine-linked glycosylation 12	1	chr1	404600	408619	9.68504	9.77979	9.83363	9.75522	9.81298	9.79501	9.68148	9.59697	9.52151	9.76615	9.78773	9.59999	0.0215811	0.67961	0.499991	-0.166165	0.0590033	0.21176
AT1G02150	Tetratricopeptide repeat (TPR)-like superfamily protein	1	chr1	408622	410611	8.65007	8.61642	8.66965	8.57588	8.82112	8.77564	8.64833	8.70173	8.60364	8.64538	8.72421	8.65123	0.0788333	0.405812	0.400818	0.00585252	0.867548	0.524033
AT1G02160	Cox19 family protein (CHCH motif)	1	chr1	410748	411597	10.468	10.4765	10.4584	10.561	10.5467	10.5539	10.4406	10.4979	10.5977	10.4676	10.5539	10.5121	0.0862235	0.000279236	0.070507	0.0444324	0.435432	0.386369
AT1G02170	metacaspase 1	1	chr1	411779	413554	11.3264	11.3821	11.2474	11.335	11.3388	11.3805	11.3498	11.3768	11.3915	11.3186	11.3514	11.3727	0.0328253	0.498002	0.437742	0.0540685	0.299112	0.333078
AT1G02180	ferredoxin-related	0	chr1	413522	414645	7.34764	7.5897	7.65391	7.51649	7.44454	7.39107	7.59477	7.59682	7.6223	7.53042	7.4507	7.60463	-0.0797186	0.492125	0.43548	0.0742152	0.509956	0.413126
AT1G02190	Fatty acid hydroxylase superfamily	1	chr1	415079	418010	4.83298	4.75746	5.17645	4.81538	4.8224	5.03743	4.86315	4.87927	5.15157	4.9223	4.89173	4.96466	-0.0305635	0.849095	0.550377	0.0423655	0.80463	0.505835
AT1G02205	Fatty acid hydroxylase superfamily	1	chr1	418748	422438	6.22449	6.6069	6.50978	6.45877	6.26982	6.57535	6.69014	6.51964	6.76458	6.44706	6.43465	6.65812	-0.0124122	0.936243	0.573346	0.21106	0.20775	0.292822
AT_1_-_0_424875-425117		0	chr1	424875	425117	5.60461	5.65521	5.71528	5.52376	5.67917	5.57515	5.69532	5.17647	5.54623	5.65836	5.59269	5.47267	-0.0656729	0.311444	0.360809	-0.185694	0.35143	0.354201
AT_1_-_1_426368-426475		0	chr1	426368	426475	5.52119	5.71802	5.55825	5.63709	5.50735	5.44823	5.49226	5.22706	5.72037	5.59916	5.53089	5.4799	-0.0682675	0.453243	0.420395	-0.119259	0.502913	0.410369
AT1G02210	NAC (No Apical Meristem) domain transcriptional regulator superfamily protein	0	chr1	427548	427811	5.21726	4.87205	5.32715	5.39726	5.02505	5.38386	5.22195	5.03327	5.15357	5.13882	5.26872	5.13627	0.129905	0.518473	0.445449	-0.00255122	0.98745	0.555193
AT1G02220	NAC domain containing protein 3	0	chr1	428814	430647	11.4369	11.2673	11.1156	11.5876	11.6502	11.6571	11.5567	11.341	11.5866	11.2732	11.6317	11.4947	0.358404	0.0541555	0.204186	0.221487	0.143039	0.259809
AT_1_+_1_431915-432007		1	chr1	431915	432007	5.86308	6.00664	5.8518	5.74561	5.80341	5.75581	5.72558	5.36644	5.83999	5.90717	5.76827	5.644	-0.1389	0.0950123	0.238691	-0.26317	0.198757	0.289041
AT1G02228	transposable element gene	0	chr1	433031	433819	5.44251	5.84779	5.64364	5.50185	5.4151	5.52221	5.75014	5.66657	5.77597	5.64465	5.47972	5.73089	-0.164926	0.291934	0.350968	0.0862471	0.542666	0.424347
AT1G02230	NAC domain containing protein 4	0	chr1	435174	436776	6.25973	6.35499	5.74437	6.3736	6.44797	6.13336	6.86789	6.5712	7.02962	6.1197	6.31831	6.8229	0.198611	0.419356	0.406251	0.703207	0.0445876	0.201462
AT1G02250	NAC domain containing protein 5	0	chr1	437951	439559	11.4454	11.4069	11.2223	11.7845	11.7163	11.7689	11.6736	11.5463	11.7858	11.3582	11.7566	11.6686	0.398396	0.021273	0.159348	0.310414	0.0335264	0.192749
AT1G02260	Divalent ion symporter	0	chr1	440441	442877	7.52779	7.74815	7.38259	7.69108	7.67349	7.83848	7.88105	7.81674	7.79464	7.55284	7.73435	7.83081	0.181505	0.225524	0.318357	0.277962	0.113066	0.242424
AT1G02270	Calcium-binding endonuclease/exonuclease/phosphatase family	0	chr1	443149	446235	9.18695	9.18265	9.19704	9.24433	9.20015	9.32241	9.26338	9.26813	9.33512	9.18888	9.25563	9.28888	0.0667478	0.201342	0.305799	0.0999952	0.0456353	0.201916
AT_1_-_1_446906-447013		0	chr1	446906	447013	5.38533	5.49437	5.52287	5.5163	4.89906	5.40738	5.1612	4.96958	5.33942	5.46752	5.27424	5.15673	-0.193278	0.417607	0.405678	-0.310789	0.0855057	0.228369
AT_1_+_2_447753-447893		1	chr1	447753	447893	6.39972	6.38519	6.53346	6.22614	6.421	6.58112	6.34798	6.02307	6.433	6.43946	6.40942	6.26802	-0.0300387	0.808619	0.539164	-0.17144	0.303062	0.334634
AT1G02280	translocon at the outer envelope membrane of chloroplasts 33	0	chr1	448463	450426	9.82731	9.78469	9.83487	10.0161	10.1084	10.0567	10.0281	10.0717	10.2216	9.81563	10.0604	10.1071	0.244767	0.00323802	0.10453	0.2915	0.0311105	0.191089
AT1G02290		0	chr1	450527	452737	9.56677	9.66852	9.78826	9.73914	9.55852	9.73385	9.48869	9.56199	9.36623	9.67452	9.67717	9.4723	0.00265235	0.977222	0.583748	-0.202215	0.078722	0.223629
AT1G02300	Cysteine proteinases superfamily protein	1	chr1	453288	455463	9.69433	9.62219	9.93127	10.1409	10.2227	10.1732	10.1745	10.02	10.1709	9.74927	10.1789	10.1218	0.429674	0.0372091	0.183688	0.37254	0.0375353	0.196516
AT1G02305	Cysteine proteinases superfamily protein	1	chr1	455688	458164	12.1492	12.1534	12.1907	12.4263	12.3264	12.3435	12.4254	12.4295	12.3961	12.1644	12.3654	12.417	0.200976	0.0123612	0.14025	0.252586	0.000158652	0.0729662
AT1G02310	Glycosyl hydrolase superfamily protein	0	chr1	458133	460696	8.25156	8.22969	7.74949	8.08014	8.04734	7.98651	8.52593	8.43541	8.58963	8.07692	8.038	8.51699	-0.0389159	0.83554	0.546336	0.440071	0.106306	0.239991
AT1G02320		1	chr1	461828	461974	5.56738	5.59343	5.5155	5.68121	5.31453	5.34835	5.50975	5.13655	5.23001	5.55877	5.44803	5.2921	-0.110741	0.444961	0.41672	-0.26667	0.135361	0.254865
AT1G02330		0	chr1	462075	463612	11.0564	11.0948	11.1309	11.0568	11.0072	11.0211	11.0632	11.1209	11.1074	11.094	11.0284	11.0972	-0.0656442	0.0737519	0.222028	0.00314965	0.915101	0.53701
AT1G02335	germin-like protein subfamily 2 member 2 precursor	0	chr1	463855	464924	11.8541	11.5207	11.8161	11.9851	11.9146	11.7421	11.1486	11.3099	11.3245	11.7303	11.8806	11.261	0.150324	0.312312	0.361164	-0.469293	0.0283831	0.189174
AT1G02340	basic helix-loop-helix (bHLH) DNA-binding superfamily protein	0	chr1	465718	467844	8.92893	8.75077	8.68756	8.95384	9.13017	8.84533	8.70915	8.84051	9.03254	8.78909	8.97645	8.86073	0.187359	0.165229	0.28647	0.0716453	0.580044	0.43622
AT1G02350	protoporphyrinogen oxidase-related	1	chr1	469818	470693	7.83555	7.89122	7.87655	7.5612	7.6014	7.62989	7.62168	7.55344	7.43721	7.86778	7.5975	7.53744	-0.27028	0.000564062	0.0795089	-0.330332	0.0183273	0.180256
Group53		0	chr1	471194	471534	8.1094	8.18786	8.24713	7.89998	7.85404	7.93861	7.9524	7.92365	7.90772	8.18147	7.89754	7.92792	-0.28392	0.00668466	0.122113	-0.253543	0.0162984	0.175828
AT1G02360	Chitinase family protein	0	chr1	471990	473160	12.4461	12.4386	11.9341	12.2019	12.1834	12.1935	12.6638	12.6895	12.8013	12.2729	12.1929	12.7182	-0.0799774	0.683478	0.501071	0.445301	0.111857	0.242047
AT1G02370	Tetratricopeptide repeat (TPR)-like superfamily protein	1	chr1	474500	476511	9.13585	9.30907	9.5701	9.06633	9.06482	9.05121	8.99747	9.08112	8.86644	9.33834	9.06079	8.98168	-0.277554	0.158711	0.282615	-0.356662	0.0873805	0.22969
AT1G02380		1	chr1	477000	478971	7.6262	7.36035	7.06776	7.00005	7.13785	7.26065	7.49349	7.42868	7.37578	7.35144	7.13285	7.43265	-0.218586	0.311586	0.360863	0.081211	0.667447	0.465298
AT1G02390	glycerol-3-phosphate acyltransferase 2	1	chr1	480852	483292	7.94273	8.04222	7.96335	7.30755	7.35719	7.52019	7.48387	7.50961	7.36364	7.98277	7.39498	7.45237	-0.587793	0.00446576	0.112393	-0.530398	0.00114769	0.106219
AT1G02391		0	chr1	483764	483919	4.76837	4.96003	5.02541	4.74717	4.73344	5.24348	5.04829	4.83102	4.90428	4.91794	4.90803	4.92786	-0.00990676	0.960798	0.579557	0.009925	0.925955	0.539953
AT1G02400	gibberellin 2-oxidase 6	1	chr1	486801	489577	10.0771	9.92633	9.81322	10.135	10.1899	10.1595	10.3907	10.4161	10.4461	9.93888	10.1615	10.4177	0.222572	0.0947774	0.238494	0.478773	0.0208296	0.182364
AT1G02405	proline-rich family protein	0	chr1	489979	490505	5.57964	5.88114	5.58544	6.05327	5.90499	6.02433	6.01438	5.90305	6.17127	5.68207	5.9942	6.02957	0.312126	0.0705449	0.21937	0.347496	0.0546745	0.208515
AT1G02410	cytochrome c oxidase assembly protein CtaG / Cox11 family	1	chr1	490925	492926	8.85337	8.88961	9.02515	8.96578	8.87204	8.96795	9.1674	9.17628	8.96627	8.92271	8.93526	9.10332	0.0125452	0.849363	0.550502	0.180604	0.109152	0.24127
AT1G02420	Pentatricopeptide repeat (PPR) superfamily protein	1	chr1	493683	495158	6.65632	6.48784	6.7099	6.69674	6.61903	6.55933	6.48618	6.59201	6.55371	6.61802	6.62503	6.54397	0.00701278	0.933471	0.572718	-0.0740526	0.393386	0.371177
AT1G02430	ADP-ribosylation factor D1B	0	chr1	495050	496062	8.00049	7.58842	7.90635	7.46691	7.54403	7.65229	7.46174	7.38683	7.32086	7.83175	7.55441	7.38981	-0.277341	0.14305	0.273149	-0.441941	0.0594767	0.212368
AT1G02440	ADP-ribosylation factor D1A	0	chr1	496586	497479	7.02464	6.78105	6.56379	6.67025	6.59164	6.63408	6.28147	6.2969	6.609	6.78983	6.63199	6.39579	-0.157836	0.357243	0.380992	-0.394039	0.0851753	0.228335
AT1G02450	NIM1-interacting 1	0	chr1	497976	498516	5.40562	5.80447	5.7761	6.17041	5.94147	7.01711	5.95791	5.82311	6.27835	5.66206	6.37633	6.01979	0.714269	0.148854	0.276057	0.357728	0.127532	0.250896
AT_1_+_1_503432-503575		1	chr1	503432	503575	5.2946	5.38807	5.73167	5.67764	5.48802	5.58852	5.38798	5.22757	5.25277	5.47145	5.58473	5.28944	0.113276	0.494776	0.436544	-0.18201	0.303764	0.334918
AT1G02460	Pectin lyase-like superfamily protein	0	chr1	504673	507204	7.79464	7.91986	7.73529	7.16864	7.40303	7.16552	7.58114	7.58361	7.4706	7.8166	7.24573	7.54511	-0.570864	0.00570162	0.117042	-0.271481	0.0187762	0.180256
AT1G02470	Polyketide cyclase/dehydrase and lipid transport superfamily protein	0	chr1	511765	513624	5.89799	5.70479	5.81783	6.01398	6.01592	6.02878	6.06402	5.83227	6.19238	5.80687	6.01956	6.02955	0.21269	0.0619977	0.211663	0.222682	0.157474	0.26766
AT1G02475	Polyketide cyclase/dehydrase and lipid transport superfamily protein	0	chr1	513843	515404	6.7487	6.67031	6.92076	6.96201	7.00115	7.10859	7.10999	7.15426	7.1881	6.77992	7.02392	7.15079	0.243995	0.0598629	0.209613	0.370864	0.0289194	0.189236
AT1G02490		1	chr1	516618	516734	6.4003	6.29992	6.45644	6.04277	6.30631	6.00735	5.90007	6.02137	6.15661	6.38555	6.11881	6.02602	-0.266747	0.0874291	0.232279	-0.359535	0.0209857	0.182364
AT1G02500	S-adenosylmethionine synthetase 1	1	chr1	518251	520437	13.8025	13.8848	13.9566	13.8627	13.7468	13.7599	13.6599	13.7402	13.5162	13.8813	13.7898	13.6388	-0.0915227	0.190182	0.299886	-0.242543	0.0444928	0.201254
AT1G02510	Outward rectifying potassium channel protein	0	chr1	520498	521668	4.78955	5.14484	5.05655	4.81317	4.99165	4.93571	4.70725	4.79613	5.07042	4.99698	4.91351	4.85793	-0.0834691	0.535133	0.451321	-0.139045	0.41437	0.379088
AT1G02520	P-glycoprotein 11	1	chr1	523651	528745	11.4179	11.536	11.278	11.3772	11.272	11.4574	11.8333	11.8261	11.8032	11.4106	11.3689	11.8209	-0.0417496	0.675384	0.498633	0.410252	0.0299479	0.189809
AT1G02530	P-glycoprotein 12	1	chr1	529795	534677	10.3217	10.4526	10.1459	10.3766	10.1436	10.3568	10.7015	10.7222	10.5908	10.3067	10.2923	10.6715	-0.0144163	0.907267	0.566133	0.364763	0.0375417	0.196516
AT1G02540		0	chr1	534827	535699	5.05732	5.25062	5.11185	5.03517	5.08363	5.00003	5.07193	5.12931	4.92912	5.13993	5.03961	5.04345	-0.10032	0.216797	0.31399	-0.0964774	0.308673	0.336927
AT1G02550	Plant invertase/pectin methylesterase inhibitor superfamily protein	1	chr1	536483	537211	4.7511	4.69006	4.26812	4.73936	4.2181	4.48997	4.2397	4.5217	4.32285	4.56976	4.48248	4.36142	-0.0872829	0.704014	0.507616	-0.208345	0.312876	0.338778
AT1G02560	nuclear encoded CLP protease 5	1	chr1	537860	540109	7.4467	7.67173	7.71243	7.6759	7.56869	7.68157	7.80455	7.67914	7.73671	7.61029	7.64205	7.74013	0.031768	0.750425	0.521859	0.129843	0.253794	0.313803
AT1G02570		1	chr1	541335	542240	9.13658	9.19522	8.7267	8.92018	8.94563	9.00747	8.90918	9.01261	8.90276	9.0195	8.95776	8.94151	-0.061737	0.717867	0.511796	-0.0779835	0.653443	0.461116
AT1G02575		1	chr1	543110	544007	5.13473	5.36109	5.24728	5.12991	5.21818	5.18393	5.0592	5.42344	5.47969	5.2477	5.17734	5.32077	-0.0703605	0.400134	0.398927	0.0730747	0.654259	0.461401
AT1G02580	SET domain-containing protein	1	chr1	544783	549202	6.33798	6.25352	6.00809	5.92458	5.60319	6.25281	5.95159	5.77347	5.81448	6.19987	5.92686	5.84652	-0.273004	0.287338	0.349338	-0.35335	0.0497653	0.204546
AT1G02590	Aldehyde oxidase/xanthine dehydrogenase, molybdopterin binding protein	0	chr1	552138	552761	5.35236	4.89437	5.22641	4.8407	5.19384	5.10858	5.02837	5.15552	4.93418	5.15771	5.04771	5.03936	-0.110005	0.561678	0.460585	-0.118353	0.493011	0.407101
AT1G02610	RING/FYVE/PHD zinc finger superfamily protein	0	chr1	553050	555994	8.82837	8.76024	8.53741	8.8147	8.89194	8.88898	8.89654	9.13517	9.05259	8.70867	8.86521	9.0281	0.156534	0.211043	0.310738	0.319428	0.0494275	0.204364
AT1G02620	Ras-related small GTP-binding family protein	1	chr1	557092	557986	5.96904	6.48012	5.72793	6.05891	5.54105	6.20344	5.74924	5.11913	5.92229	6.05903	5.93447	5.59689	-0.124565	0.698871	0.50578	-0.462142	0.234299	0.304439
AT1G02630	Nucleoside transporter family protein	0	chr1	560610	562424	6.06586	5.83816	6.2309	5.96422	5.94688	5.78341	6.05698	5.78576	6.06098	6.04497	5.89817	5.96791	-0.146804	0.334302	0.371282	-0.077065	0.626354	0.452078
AT1G02640	beta-xylosidase 2	1	chr1	564205	567769	12.6513	12.772	13.0115	12.9259	12.9626	12.7631	13.3087	13.4021	13.183	12.8116	12.8838	13.2979	0.0722309	0.593916	0.471629	0.486319	0.0247998	0.186999
AT1G02650	Tetratricopeptide repeat (TPR)-like superfamily protein	1	chr1	568704	570418	5.75299	6.02444	6.06034	6.26555	6.06457	9.14898	6.14414	6.33136	6.18577	5.94592	7.1597	6.22042	1.21378	0.347145	0.376675	0.2745	0.0863556	0.228752
AT1G02660	alpha/beta-Hydrolases superfamily protein	0	chr1	571955	574981	6.92085	7.1035	6.83968	7.00228	7.08958	7.21224	7.58495	7.84439	7.81674	6.95468	7.10137	7.74869	0.146692	0.216473	0.313939	0.794016	0.00221085	0.122338
AT1G02670	P-loop containing nucleoside triphosphate hydrolases superfamily protein	1	chr1	576046	580299	6.17541	6.36272	6.55063	6.66764	6.62407	7.17315	6.53144	6.64981	6.32863	6.36292	6.82162	6.50329	0.4587	0.104606	0.246511	0.140371	0.383736	0.367868
AT1G02680	TBP-associated factor 13	1	chr1	580625	582310	8.15164	8.21021	8.18969	8.34698	8.29204	8.30347	8.21233	8.18287	8.36678	8.18384	8.31416	8.25399	0.130319	0.00556574	0.116106	0.0701471	0.343965	0.351448
AT1G02681		1	chr1	582413	582922	4.96381	5.08889	5.14023	4.93325	5.11141	4.99026	4.93752	5.20552	5.17808	5.06431	5.01164	5.10704	-0.0526661	0.516967	0.444994	0.0427313	0.695213	0.474419
AT1G02690	importin alpha isoform 6	1	chr1	584260	587219	10.1403	10.2767	10.5434	10.0786	10.1477	10.1571	10.257	10.2258	10.0767	10.3202	10.1278	10.1865	-0.192342	0.242806	0.327073	-0.133651	0.385824	0.368602
AT1G02700		1	chr1	588329	589480	4.9695	6.66366	4.805	4.29694	4.90863	4.87123	5.06272	5.13939	4.94323	5.47938	4.69227	5.04845	-0.787118	0.31567	0.362771	-0.430937	0.544057	0.424683
AT1G02710	glycine-rich protein	0	chr1	589706	589996	4.90267	5.09876	5.18258	5.4015	4.99315	5.14158	4.93558	4.96958	4.89448	5.06134	5.17874	4.93321	0.117406	0.469577	0.426121	-0.128125	0.259139	0.316263
AT1G02720	galacturonosyltransferase 5	1	chr1	591826	594236	8.7638	8.67934	8.73457	8.68665	8.70203	8.74659	8.60258	8.72997	8.62526	8.7259	8.71176	8.6526	-0.0141442	0.670115	0.497005	-0.073299	0.202168	0.290368
AT1G02730	cellulose synthase-like D5	0	chr1	594573	598657	8.99432	9.36808	9.33602	9.00921	8.95876	8.98559	9.2163	9.23647	8.81037	9.23281	8.98452	9.08771	-0.248287	0.171799	0.289583	-0.145097	0.473613	0.399706
AT1G02740	MRG family protein	0	chr1	599416	602038	8.11704	8.09503	7.98722	8.16214	8.26065	8.20711	8.18981	8.26649	8.33828	8.06643	8.20997	8.26486	0.143537	0.0491567	0.198628	0.198426	0.0279758	0.188548
AT1G02750	Drought-responsive family protein	1	chr1	602497	604292	9.88908	9.84304	9.73997	10.1057	10.1072	10.1029	10.2651	10.1754	10.4284	9.82403	10.1053	10.2896	0.281273	0.0236154	0.16233	0.465608	0.0100071	0.167337
AT1G02770	Protein of unknown function (DUF626)	0	chr1	604873	606693	6.59416	6.51588	6.8014	6.79771	7.03998	6.68287	6.68872	6.57964	6.94572	6.63715	6.84019	6.73803	0.20304	0.211124	0.310738	0.100882	0.507282	0.412346
AT1G02780	Ribosomal protein L19e family protein	0	chr1	607808	609465	14.8266	14.9838	15.0905	14.7892	14.7608	14.8488	14.843	14.9261	14.8323	14.967	14.7996	14.8671	-0.167359	0.150501	0.276748	-0.0998257	0.323668	0.34265
AT1G02790	polygalacturonase 4	0	chr1	610391	612324	4.88148	5.19372	4.9994	4.75636	5.35108	4.84736	5.01963	4.52746	5.09999	5.02487	4.98493	4.88236	-0.0399336	0.859101	0.553608	-0.142507	0.529516	0.42029
AT1G02800	cellulase 2	0	chr1	613216	616191	4.89582	4.86742	4.69496	4.88746	4.76873	4.53844	4.64939	4.5809	4.56198	4.8194	4.73154	4.59743	-0.0878578	0.51291	0.443549	-0.221974	0.0550102	0.208772
AT_1_+_1_617117-617212		1	chr1	617117	617212	5.11966	4.90289	5.00877	4.72436	5.13739	4.91238	4.8427	4.91907	5.11511	5.01044	4.92471	4.95896	-0.0857283	0.56969	0.463492	-0.0514799	0.64336	0.457697
AT1G02810	Plant invertase/pectin methylesterase inhibitor superfamily	1	chr1	618265	620480	7.28628	7.57172	7.5019	7.48457	7.38178	7.5186	7.54111	7.3986	7.29213	7.4533	7.46165	7.41061	0.00834928	0.935899	0.573315	-0.0426897	0.723412	0.482993
AT1G02813	Protein of unknown function, DUF538	1	chr1	620678	621289	5.22401	5.34593	5.20835	4.996	5.02883	5.23573	5.0558	5.29617	5.08681	5.25943	5.08685	5.14626	-0.172574	0.134773	0.267637	-0.113169	0.279721	0.325009
AT1G02816	Protein of unknown function, DUF538	1	chr1	621461	622469	7.71387	7.82613	7.52761	7.77954	7.8062	7.84755	7.93747	7.82738	7.75282	7.68921	7.8111	7.83922	0.12189	0.294673	0.352532	0.150014	0.229949	0.302461
AT1G02820	Late embryogenesis abundant 3 (LEA3) family protein	0	chr1	623765	624475	5.42076	5.56549	5.36702	5.2622	5.53127	5.39838	5.55866	5.58509	5.82379	5.45109	5.39728	5.65585	-0.0538087	0.613046	0.478352	0.204759	0.125957	0.250034
AT1G02830	Ribosomal L22e protein family	0	chr1	625145	625608	5.24681	5.25516	5.29796	5.19217	5.07713	4.98383	5.29345	5.13893	5.23792	5.26664	5.08438	5.22344	-0.182261	0.0855878	0.231187	-0.0432026	0.445738	0.390414
AT_1_+_2_625992-626108		1	chr1	625992	626108	5.4682	5.14996	5.49959	5.37968	5.32224	4.89214	5.15892	5.06347	5.34734	5.37258	5.19802	5.18991	-0.174564	0.415055	0.404643	-0.182676	0.265393	0.319084
AT1G02840	RNA-binding (RRM/RBD/RNP motifs) family protein	1	chr1	626741	629819	12.0048	12.0551	12.1991	12.0773	12.1343	12.18	11.9505	11.9777	11.8895	12.0863	12.1305	11.9393	0.0441879	0.547989	0.455601	-0.147066	0.111824	0.242047
AT1G02850	beta glucosidase 11	1	chr1	630505	633259	8.51288	8.68002	8.94764	9.19886	9.14023	9.24457	9.14381	9.00921	9.14778	8.71351	9.19455	9.10027	0.481039	0.0559296	0.205421	0.386752	0.0789182	0.223716
AT1G02860	SPX (SYG1/Pho81/XPR1) domain-containing protein	1	chr1	635144	637262	10.8304	10.8442	10.8261	11.2883	11.2663	11.2428	11.1712	11.2586	11.229	10.8336	11.2658	11.2196	0.432262	0.000180916	0.0646378	0.386017	0.00318858	0.13117
AT1G02870		0	chr1	637214	638677	10.9587	11.0965	11.252	11.0499	11.0499	11.045	10.9613	10.9422	11.0515	11.1024	11.0482	10.985	-0.0541566	0.588086	0.469985	-0.117406	0.299849	0.33332
CUFF.919		1	chr1	641564	642164	6.65125	6.91292	6.66661	6.97036	6.99236	6.85679	6.97187	6.93662	6.97057	6.74359	6.93984	6.95969	0.196243	0.13202	0.265677	0.216093	0.123054	0.24791
AT1G02880	thiamin pyrophosphokinase1	0	chr1	642752	644903	5.62741	5.91933	5.38604	5.78902	5.87235	5.56768	5.57755	6.04655	5.8872	5.64426	5.74302	5.8371	0.0987525	0.616912	0.479343	0.192837	0.404311	0.375521
AT1G02890	AAA-type ATPase family protein	0	chr1	645092	651907	8.12046	8.1998	8.20139	8.4995	8.21523	8.40091	8.22817	8.34751	8.36067	8.17389	8.37188	8.31212	0.197995	0.130311	0.264165	0.138233	0.0607115	0.213473
AT_1_+_0_652495-652653		1	chr1	652495	652653	4.72047	4.70222	4.71337	4.87356	4.87118	5.14024	5.20457	5.0057	4.91378	4.71202	4.96166	5.04135	0.249637	0.107156	0.248362	0.32933	0.0611543	0.213485
AT1G02900	rapid alkalinization factor 1	0	chr1	653765	654343	12.9547	12.8585	12.7631	13.066	13.1442	13.0016	13.038	13.0969	13.2564	12.8588	13.0706	13.1304	0.211828	0.0413725	0.188829	0.271678	0.0349187	0.194213
AT1G02910	tetratricopeptide repeat (TPR)-containing protein	0	chr1	655577	658148	8.9722	9.10398	9.11257	9.19622	9.16719	9.18463	9.15162	9.22503	9.16233	9.06292	9.18268	9.17966	0.119762	0.11423	0.252664	0.116741	0.106832	0.240461
AT1G02920	glutathione S-transferase 7	0	chr1	658657	659771	13.9988	13.9119	12.498	11.8553	11.8453	11.9587	13.1552	13.5214	13.3598	13.4696	11.8864	13.3455	-1.58313	0.0820381	0.228832	-0.12409	0.824618	0.511638
AT1G02930	glutathione S-transferase 6	0	chr1	661177	662456	12.789	12.7676	11.0494	10.8148	10.6234	10.721	12.1492	12.6577	12.4906	12.202	10.7197	12.4325	-1.48229	0.122438	0.258785	0.230486	0.732031	0.485654
AT1G02940	glutathione S-transferase (class phi) 5	0	chr1	663079	664128	6.01089	5.73559	5.51488	5.35266	7.00147	5.40759	5.81443	6.44599	5.94429	5.75379	5.92057	6.06824	0.166789	0.790596	0.533734	0.314451	0.265809	0.319251
AT1G02950	glutathione S-transferase F4	0	chr1	665152	666452	10.3261	10.4693	10.5481	10.5724	10.4735	10.3994	10.0669	10.0697	10.1653	10.4478	10.4818	10.1006	0.033945	0.701716	0.50668	-0.34721	0.0182956	0.180256
AT1G02952	other RNA	1	chr1	665354	666367	5.71067	5.28277	5.51709	5.57831	5.83837	5.51857	5.67032	5.33614	5.56923	5.50351	5.64508	5.52523	0.141573	0.423129	0.407728	0.0217204	0.89787	0.532424
AT1G02960		0	chr1	666872	669837	7.93338	7.92692	8.10751	8.21466	8.0895	8.22886	7.91674	8.13545	7.80655	7.98927	8.17767	7.95291	0.188403	0.0681813	0.216984	-0.0363572	0.767509	0.495984
AT_1_-_2_670663-670854		0	chr1	670663	670854	5.05769	4.92681	4.96214	5.10984	4.85772	4.85666	5.19184	4.96819	5.07052	4.98221	4.9414	5.07685	-0.0408069	0.691739	0.503665	0.0946407	0.291917	0.330054
AT1G02965		0	chr1	671661	672814	5.50886	5.66251	5.53342	5.65929	5.73858	5.46751	5.73916	5.27125	5.48399	5.56827	5.62179	5.49813	0.0535261	0.6043	0.47558	-0.0701332	0.664585	0.464434
AT1G02970	WEE1 kinase homolog	1	chr1	673306	676378	6.75463	7.08476	6.96123	6.96339	6.78162	6.91655	6.67368	6.75799	6.73754	6.93354	6.88719	6.72307	-0.0463484	0.702144	0.506762	-0.21047	0.153228	0.265122
AT1G02980	cullin 2	1	chr1	677869	681310	6.78953	6.90421	6.71382	7.15297	7.1515	7.16236	6.83123	6.83833	6.99906	6.80252	7.15561	6.88954	0.35309	0.0233454	0.162059	0.0870217	0.326443	0.343606
AT1G02990		0	chr1	681396	687315	5.62002	6.00487	5.84104	5.95822	5.73173	5.71288	6.14103	6.03312	6.06038	5.82198	5.80094	6.07817	-0.0210329	0.88583	0.560678	0.256197	0.139607	0.257329
AT1G03000	peroxin 6	0	chr1	687890	692560	9.59882	9.59521	9.71416	9.79501	9.72058	9.71584	9.64562	9.67257	9.67158	9.63606	9.74381	9.66326	0.10775	0.0928455	0.237129	0.0271969	0.561394	0.430623
AT1G03010	Phototropic-responsive NPH3 family protein	1	chr1	693480	696382	8.47453	8.6398	8.41977	8.35639	8.39289	8.36595	8.22836	8.45708	8.4005	8.51137	8.37175	8.36198	-0.139622	0.166036	0.287042	-0.149384	0.192602	0.286118
AT1G03020	Thioredoxin superfamily protein	0	chr1	698207	698515	5.48059	5.20625	4.89585	5.43285	5.24716	5.21328	5.19422	5.31291	5.53417	5.19423	5.29776	5.3471	0.103536	0.61457	0.478709	0.152871	0.488594	0.405395
AT1G03022		1	chr1	699121	699246	5.75865	5.87317	5.83367	5.71544	5.86864	5.83393	5.77999	5.52089	5.54598	5.82183	5.806	5.61562	-0.0158284	0.797175	0.535752	-0.206211	0.115298	0.243357
AT1G03030	P-loop containing nucleoside triphosphate hydrolases superfamily protein	1	chr1	701478	703864	5.7333	5.76869	5.78051	6.05451	5.91763	5.65412	5.89344	5.82567	6.07825	5.76083	5.87542	5.93245	0.114588	0.432577	0.411946	0.171621	0.14658	0.261361
AT1G03040	basic helix-loop-helix (bHLH) DNA-binding superfamily protein	0	chr1	703906	706631	7.88266	7.80849	8.02915	8.11667	8.04828	8.10419	8.00896	8.10113	8.32246	7.90677	8.08972	8.14418	0.182948	0.0943379	0.238053	0.237416	0.112671	0.242231
AT_1_-_2_707014-707175		0	chr1	707014	707175	5.11166	5.02201	5.07118	5.20077	5.08496	4.8676	5.09219	6.57498	4.89221	5.06828	5.05111	5.51979	-0.0171729	0.878942	0.558835	0.451508	0.484615	0.403994
AT1G03050	ENTH/ANTH/VHS superfamily protein	1	chr1	707726	710041	4.73914	4.88645	4.88345	4.98472	5.09026	5.09407	5.22336	5.0251	4.97222	4.83635	5.05635	5.07356	0.22	0.0253037	0.165932	0.237209	0.0697163	0.218464
AT1G03055		0	chr1	710018	711803	5.07465	4.96244	5.17712	5.55005	5.13945	5.55311	5.31473	6.40459	5.1805	5.0714	5.4142	5.63327	0.342801	0.114393	0.252805	0.561871	0.282928	0.326682
AT1G03060	Beige/BEACH domain ;WD domain, G-beta repeat protein	0	chr1	712473	726891	9.2649	9.51782	9.46562	9.35113	9.29721	9.37305	9.41867	9.49043	9.2707	9.41612	9.34046	9.39327	-0.0756538	0.433015	0.412115	-0.0228488	0.831845	0.513783
AT1G03070	Bax inhibitor-1 family protein	1	chr1	729901	731557	9.09294	9.04735	8.85364	9.1071	9.02874	9.17746	8.95988	8.94594	8.98543	8.99798	9.10443	8.96375	0.106455	0.293546	0.35184	-0.034229	0.688235	0.472137
AT1G03080	kinase interacting (KIP1-like) family protein	0	chr1	731611	738056	10.9058	10.9976	10.8837	10.9698	10.9652	10.9613	10.8579	10.9092	10.84	10.929	10.9654	10.869	0.0363911	0.406335	0.40113	-0.060039	0.228591	0.30225
AT1G03090	methylcrotonyl-CoA carboxylase alpha chain, mitochondrial / 3-methylcrotonyl-CoA carboxylase 1 (MCCA)	1	chr1	739679	744184	5.64953	5.43838	5.3992	5.26526	5.47378	5.7582	5.74483	5.21294	5.40578	5.49571	5.49908	5.45451	0.00337449	0.984715	0.585527	-0.0411924	0.828211	0.512757
AT1G03100	Pentatricopeptide repeat (PPR) superfamily protein	0	chr1	743885	746479	6.34131	6.7153	6.67431	6.56991	6.56406	7.63672	6.33729	6.6094	6.50465	6.57697	6.92356	6.48378	0.346589	0.438302	0.414161	-0.0931935	0.553634	0.428059
AT1G03103	Bifunctional inhibitor/lipid-transfer protein/seed storage 2S albumin superfamily protein	1	chr1	747197	748057	4.96039	5.00049	5.08123	5.37423	5.03698	4.89338	5.15682	4.67761	5.14717	5.01404	5.10153	4.99386	0.0874915	0.605892	0.476084	-0.020173	0.911405	0.535924
AT1G03106		0	chr1	748102	749034	6.61109	6.62701	6.53737	6.23776	6.58802	6.41353	6.60822	6.46434	6.70936	6.59182	6.4131	6.59398	-0.178721	0.213899	0.312228	0.0021514	0.979524	0.553387
AT1G03110	Transducin/WD40 repeat-like superfamily protein	1	chr1	749246	751963	8.86837	9.18069	9.24498	8.9722	8.99017	8.8727	8.94256	9.0907	9.01146	9.09801	8.94503	9.01491	-0.152985	0.318223	0.363971	-0.083104	0.55854	0.429663
AT1G03120	responsive to abscisic acid 28	1	chr1	752271	753140	5.52673	5.53023	5.4366	5.90774	5.72358	5.58354	5.86929	6.28402	5.72556	5.49785	5.73829	5.95962	0.240436	0.113335	0.252316	0.461773	0.105671	0.239613
AT1G03130	photosystem I subunit D-2	0	chr1	753307	754198	5.11418	5.54767	5.6589	5.61922	5.29308	5.48931	5.79184	6.04146	5.60901	5.44025	5.4672	5.8141	0.0269561	0.896408	0.563788	0.373856	0.152271	0.264373
AT1G03140	splicing factor Prp18 family protein	0	chr1	754371	756303	10.9354	10.9095	11.0376	11.1234	11.1905	11.1608	11.0285	11.0058	11.1313	10.9608	11.1582	11.0552	0.197402	0.0212831	0.159369	0.094422	0.16093	0.269681
AT1G03150	Acyl-CoA N-acyltransferases (NAT) superfamily protein	1	chr1	756414	758612	10.5958	10.6575	10.7122	10.7334	10.6693	10.736	10.6124	10.6264	10.5881	10.6552	10.7129	10.609	0.0577277	0.234334	0.322749	-0.0462057	0.301663	0.334067
AT1G03160	FZO-like	1	chr1	761282	766158	8.26528	8.42018	8.53343	8.24594	8.1846	8.36052	8.45478	8.45023	8.25652	8.4063	8.26369	8.38718	-0.142609	0.211436	0.31081	-0.0191214	0.860054	0.521751
AT1G03170	Protein of unknown function (DUF3049)	1	chr1	769632	770684	5.72107	6.05037	6.42107	6.01137	5.94947	6.03125	5.94905	5.91439	5.8018	6.06417	5.99736	5.88841	-0.0668088	0.773267	0.529279	-0.175757	0.478423	0.401575
AT1G03180		1	chr1	773411	775344	6.83897	6.98942	7.06321	6.8894	7.0358	6.9549	7.20846	6.91099	6.77181	6.96387	6.96003	6.96376	-0.00383557	0.963708	0.580305	-0.000113751	0.999422	0.557939
AT1G03190	RAD3-like DNA-binding helicase protein	1	chr1	775527	780062	8.27623	8.4327	8.39366	8.451	8.34045	8.38024	8.3552	8.35729	8.48428	8.36753	8.39056	8.39892	0.0230368	0.709565	0.50936	0.0313968	0.647171	0.459025
AT1G03200		1	chr1	780602	781285	8.8025	8.65842	8.61933	8.75183	8.71439	8.72406	8.59079	8.52757	8.38524	8.69342	8.73009	8.5012	0.0366776	0.580366	0.467258	-0.192217	0.0806202	0.225257
AT1G03210	Phenazine biosynthesis PhzC/PhzF protein	1	chr1	782948	784240	11.9902	11.8541	11.7648	12.0612	12.0386	12.1117	11.8654	11.9006	11.8394	11.8697	12.0705	11.8685	0.200849	0.079946	0.226844	-0.00120547	0.987263	0.55516
AT1G03220	Eukaryotic aspartyl protease family protein	1	chr1	787122	788651	14.8609	14.8609	14.7035	15.1414	15.0123	15.2138	15.2498	15.337	15.1414	14.8084	15.1225	15.2428	0.314092	0.0168262	0.149502	0.434329	0.00498485	0.144185
AT_1_+_2_789174-789323		1	chr1	789174	789323	5.3815	5.42842	5.55161	5.20502	4.97916	5.42212	5.67342	5.67929	5.52675	5.45384	5.2021	5.62649	-0.251745	0.178097	0.29325	0.172642	0.0722894	0.219875
AT1G03230	Eukaryotic aspartyl protease family protein	1	chr1	790091	791592	9.24868	9.41481	9.57656	9.13635	8.88824	9.20848	9.3177	9.27472	8.7312	9.41335	9.07769	9.10787	-0.335657	0.0684824	0.217308	-0.305474	0.245352	0.309407
AT1G03240		0	chr1	792222	792986	5.25938	5.39571	5.33329	5.35017	5.62096	5.61465	5.47599	5.20632	5.04167	5.32946	5.52859	5.24133	0.199132	0.142052	0.272572	-0.088134	0.564769	0.431847
AT1G03250		0	chr1	793353	795376	6.63039	6.47817	6.4373	6.25951	6.38176	6.32344	6.34645	6.34161	6.19445	6.51528	6.32157	6.29417	-0.193714	0.0598897	0.209613	-0.221113	0.0469354	0.202866
AT1G03260	SNARE associated Golgi protein family	0	chr1	795532	798463	7.49569	7.51199	7.61641	7.51494	7.48834	7.60996	7.51492	7.78873	7.79872	7.54136	7.53775	7.70079	-0.00361218	0.948787	0.576449	0.159426	0.222364	0.299269
AT1G03270	CBS domain-containing protein with a domain of unknown function (DUF21)	1	chr1	799191	802436	7.68517	7.62107	7.71853	7.39184	7.31818	7.52224	7.55048	7.49761	7.42839	7.67492	7.41075	7.49216	-0.264173	0.030481	0.175202	-0.182767	0.0172655	0.177797
AT1G03280	Transcription factor TFIIE, alpha subunit	1	chr1	803035	807066	10.206	10.1694	10.0469	10.1917	10.1697	10.1972	10.1506	10.1869	10.1498	10.1407	10.1862	10.1624	0.0454495	0.445365	0.416937	0.0216653	0.700749	0.476195
AT1G03290		1	chr1	807361	810868	11.1608	11.1355	11.0807	11.1864	11.1515	11.1979	11.2107	11.223	11.0969	11.1257	11.1786	11.1769	0.0529494	0.142158	0.272598	0.0511809	0.346715	0.35276
AT1G03300	DOMAIN OF UNKNOWN FUNCTION 724 1	0	chr1	811033	813086	6.43605	7.27267	6.70582	6.68958	6.48603	6.70025	6.50335	6.77956	6.46361	6.80485	6.62529	6.58217	-0.17956	0.547121	0.455366	-0.222673	0.471373	0.398885
AT1G03310	debranching enzyme 1	1	chr1	813471	816749	8.89619	8.87928	9.11348	8.89558	8.8391	8.87067	8.88865	8.87142	8.83099	8.96298	8.86845	8.86369	-0.0945342	0.336003	0.372014	-0.0992972	0.317418	0.340529
AT1G03320		1	chr1	817027	817767	4.74657	5.06211	4.89917	4.90926	5.20407	5.12823	4.9708	4.74009	4.36795	4.90261	5.08052	4.69295	0.177906	0.233728	0.322281	-0.209666	0.366933	0.360561
AT1G03330	Small nuclear ribonucleoprotein family protein	0	chr1	817983	819563	12.614	12.5969	12.632	12.6307	12.6834	12.6757	12.6489	12.6101	12.6629	12.6143	12.6633	12.6406	0.0489874	0.0767908	0.223972	0.0263264	0.244883	0.309289
AT1G03340		1	chr1	819662	821317	7.79049	7.77234	7.6622	7.8404	7.89507	7.87217	7.77807	7.74983	8.11991	7.74168	7.86921	7.8826	0.127534	0.0708	0.219489	0.140922	0.359461	0.357547
AT1G03350	BSD domain-containing protein	0	chr1	822638	824393	11.4015	11.459	11.4622	11.3794	11.3749	11.4717	11.4632	11.4825	11.3734	11.4409	11.4087	11.4397	-0.0322209	0.4438	0.416295	-0.0012292	0.976676	0.552912
AT1G03360	ribosomal RNA processing 4	1	chr1	824537	826358	10.207	10.4432	10.7033	10.273	10.2407	10.3689	10.2555	10.2262	9.79604	10.4512	10.2942	10.0926	-0.156957	0.388982	0.394494	-0.358603	0.157372	0.267581
AT1G03365	RING/U-box superfamily protein	1	chr1	826569	830383	6.97516	7.10933	6.91056	7.12928	6.92834	6.86808	6.93435	6.97444	7.09626	6.99835	6.97524	7.00168	-0.0231159	0.826554	0.544116	0.00333276	0.96725	0.550305
AT1G03370	C2 calcium/lipid-binding and GRAM domain containing protein	1	chr1	830627	835361	8.30849	8.4889	8.22384	8.4693	8.46588	8.48454	8.57045	8.48051	8.72879	8.34041	8.47324	8.59325	0.132831	0.230869	0.320648	0.25284	0.0771374	0.22245
AT1G03380	homolog of yeast autophagy 18 (ATG18) G	1	chr1	835785	840940	7.81844	8.04336	8.0461	8.26099	8.19152	8.25281	8.04803	8.22384	8.37799	7.9693	8.23511	8.21662	0.265811	0.0621348	0.211739	0.247322	0.11532	0.243357
AT1G03390	HXXXD-type acyl-transferase family protein	0	chr1	841033	842418	5.0839	5.16214	4.90189	5.18614	5.11353	5.0582	5.19863	4.97551	5.2205	5.04931	5.11929	5.13155	0.0699784	0.475535	0.42863	0.0822384	0.495748	0.408082
AT1G03400	2-oxoglutarate (2OG) and Fe(II)-dependent oxygenase superfamily protein	0	chr1	842747	844190	6.30189	6.51279	6.26705	6.63006	6.70101	6.59644	6.42787	6.41372	6.56029	6.36058	6.64251	6.46729	0.281931	0.0514822	0.201066	0.106718	0.313292	0.338945
AT1G03410	2-oxoglutarate (2OG) and Fe(II)-dependent oxygenase superfamily protein	0	chr1	844436	847683	6.50726	6.67593	6.37735	6.78265	6.87738	6.78752	5.94217	5.85515	5.93529	6.52018	6.81585	5.91087	0.295673	0.0624959	0.212069	-0.60931	0.012957	0.172983
AT1G03420	transposable element gene	1	chr1	846664	847739	10.3708	10.383	10.4715	10.1612	10.226	10.2664	10.2913	10.3366	10.2558	10.4084	10.2179	10.2946	-0.190567	0.0124865	0.140381	-0.113853	0.0493693	0.204314
AT1G03430	histidine-containing phosphotransfer factor 5	1	chr1	847873	849500	9.09964	9.03726	8.97486	9.26383	9.24575	9.17375	9.03858	9.0943	9.1899	9.03725	9.22778	9.10759	0.190527	0.0157122	0.146942	0.0703393	0.287326	0.32828
AT1G03440	Leucine-rich repeat (LRR) family protein	1	chr1	852366	854032	7.25348	7.49804	7.43959	7.82966	7.65696	7.96541	7.64181	7.56256	7.75315	7.39704	7.81735	7.65251	0.420308	0.0235199	0.162162	0.255472	0.0546646	0.208515
AT1G03445	Serine/threonine protein phosphatase family protein	0	chr1	854410	859701	5.46983	5.91274	5.4761	5.94822	6.04884	6.03536	5.92314	5.51843	5.55915	5.61956	6.0108	5.66691	0.391246	0.110475	0.250196	0.0473468	0.820337	0.510443
AT1G03457	RNA-binding (RRM/RBD/RNP motifs) family protein	0	chr1	860788	864125	7.59716	7.62168	7.36436	7.74644	7.59693	7.53593	7.57249	7.73833	7.76545	7.52773	7.62643	7.69209	0.0986972	0.396209	0.39745	0.164355	0.187924	0.28366
AT1G03470	Kinase interacting (KIP1-like) family protein	0	chr1	865915	867733	7.91831	7.91876	7.98677	8.3986	8.36028	8.27576	8.05392	8.06625	7.98686	7.94128	8.34488	8.03568	0.403602	0.00156639	0.0903238	0.0943949	0.0485028	0.203614
AT1G03475	Coproporphyrinogen III oxidase	0	chr1	869051	871211	9.16377	9.36784	9.38746	9.30166	9.37106	9.39233	9.34997	9.44219	9.28843	9.30636	9.35502	9.3602	0.0486598	0.577093	0.4661	0.0538395	0.564122	0.431529
AT1G03490	NAC domain containing protein 6	1	chr1	871874	872906	4.9571	5.07405	4.73327	5.12346	4.92473	4.90368	5.15034	4.79857	4.98191	4.92147	4.98396	4.97694	0.0624846	0.638626	0.486619	0.0554655	0.71699	0.481055
AT1G03495	HXXXD-type acyl-transferase family protein	1	chr1	873184	874935	6.52806	6.36475	6.29533	6.29417	6.08261	6.19298	6.16596	5.79249	6.16798	6.39604	6.18992	6.04214	-0.206123	0.0899081	0.234299	-0.3539	0.085971	0.228606
AT1G03502	snoRNA	0	chr1	875358	875471	9.03395	8.65536	8.5422	8.96448	8.96902	9.02764	8.60772	8.60335	8.8727	8.74384	8.98705	8.69459	0.24321	0.242103	0.326803	-0.0492469	0.793357	0.502778
AT1G03506	snoRNA	0	chr1	875518	875604	10.5432	10.2023	10.0047	10.0631	10.4568	10.2823	10.7761	10.2828	10.4847	10.2501	10.2674	10.5146	0.0173081	0.933654	0.57278	0.264478	0.282133	0.326327
AT1G03510	Tetratricopeptide repeat (TPR)-like superfamily protein	0	chr1	876258	877547	6.44634	6.808	6.88641	6.81475	6.64371	6.61939	6.65316	6.70445	6.79637	6.71358	6.69262	6.71799	-0.0209663	0.897508	0.56404	0.00440907	0.97762	0.553081
AT1G03520	Core-2/I-branching beta-1,6-N-acetylglucosaminyltransferase family protein	0	chr1	877862	880158	5.76544	5.79166	5.85515	5.85511	5.50579	5.66585	5.82748	5.82876	5.51892	5.80408	5.67558	5.72506	-0.1285	0.330344	0.369415	-0.0790275	0.527193	0.419468
AT1G03530	nuclear assembly factor 1	0	chr1	880496	883391	8.0167	8.47819	8.64477	8.24116	8.28852	8.34379	8.21047	8.36812	8.16413	8.37989	8.29116	8.24757	-0.0887313	0.684768	0.501335	-0.132315	0.561461	0.43064
AT1G03540	Pentatricopeptide repeat (PPR-like) superfamily protein	1	chr1	883782	885611	6.15708	6.3712	6.30142	6.25966	5.97254	6.24952	6.17827	6.37779	5.98324	6.27657	6.16057	6.17977	-0.115994	0.371262	0.386722	-0.0968023	0.50916	0.412914
AT1G03550	Secretory carrier membrane protein (SCAMP) family protein	0	chr1	885623	887956	9.45563	9.54467	9.50508	9.44984	9.3613	9.33727	9.31522	9.2848	9.32882	9.50179	9.3828	9.30961	-0.11899	0.054257	0.204211	-0.192182	0.00720787	0.155842
AT1G03545		1	chr1	885941	887906	5.74817	5.84345	5.78107	6.01508	5.79811	5.75351	5.92446	5.88494	5.66422	5.7909	5.85556	5.82454	0.0646689	0.514868	0.444234	0.0336433	0.725854	0.483794
AT1G03560	Pentatricopeptide repeat (PPR-like) superfamily protein	0	chr1	890156	892410	8.08886	8.25985	8.38443	8.23846	8.07367	8.33098	8.30347	8.35685	8.19584	8.24438	8.21437	8.28538	-0.0300062	0.805644	0.538271	0.0410052	0.702491	0.476873
AT1G03580		1	chr1	892847	894052	5.44279	5.59728	5.6328	5.4498	5.64185	5.59489	5.6789	5.53001	5.90451	5.55762	5.56218	5.70447	0.00455373	0.958436	0.578857	0.146847	0.318436	0.340767
AT1G03590	Protein phosphatase 2C family protein	0	chr1	894254	897518	10.1506	10.3439	10.3673	10.1274	10.1828	10.2619	10.3105	10.2338	10.0477	10.2872	10.1907	10.1973	-0.0965433	0.30462	0.357736	-0.0899014	0.436518	0.38668
AT1G03600	photosystem II family protein	1	chr1	898876	899655	7.39501	7.43264	7.88622	7.4626	7.42106	7.21088	8.06639	7.94569	8.12812	7.57129	7.36484	8.04673	-0.206447	0.327593	0.368241	0.475442	0.0822305	0.226418
AT1G03610	Protein of unknown function (DUF789)	1	chr1	900887	903003	7.20068	7.34934	7.51583	7.48228	7.4906	7.40967	7.42596	7.34798	7.40303	7.35528	7.46085	7.39233	0.105567	0.366671	0.384851	0.0370434	0.727467	0.484307
AT1G03620	ELMO/CED-12 family protein	0	chr1	904319	906186	8.11991	8.09914	8.38267	8.46428	8.50401	8.30837	8.19904	8.02142	7.94112	8.20057	8.42555	8.05386	0.224979	0.119198	0.256581	-0.146712	0.286688	0.328171
AT1G03630	protochlorophyllide oxidoreductase C	1	chr1	907642	909376	8.0022	8.00058	8.54168	7.95313	8.03921	7.66626	8.46154	8.47904	8.45399	8.18149	7.8862	8.46485	-0.295288	0.249591	0.330568	0.283368	0.256137	0.314684
AT1G03650	Acyl-CoA N-acyltransferases (NAT) superfamily protein	0	chr1	910023	911193	5.54336	5.70909	5.54832	5.72565	5.84632	5.78033	5.95038	5.69051	5.8757	5.60026	5.7841	5.83886	0.183844	0.0563947	0.205995	0.238604	0.0720211	0.219725
AT1G03660	Ankyrin-repeat containing protein	0	chr1	911436	911759	9.19597	8.89142	8.37732	9.01131	9.02267	8.97811	9.42708	9.4415	9.8682	8.82157	9.00403	9.57893	0.182459	0.524944	0.447389	0.757356	0.0659819	0.216858
AT1G03670	ankyrin repeat family protein	0	chr1	914222	916222	5.97242	6.04891	5.73886	5.40406	5.27852	5.60539	5.33003	5.35686	5.30048	5.92007	5.42932	5.32913	-0.490745	0.0211742	0.159101	-0.59094	0.021353	0.183034
AT1G03680	thioredoxin M-type 1	0	chr1	916819	918064	9.28917	9.34427	9.51782	9.51606	9.472	9.55852	9.55317	9.55016	9.52264	9.38375	9.51553	9.54199	0.131773	0.187353	0.298114	0.158237	0.145941	0.261029
AT1G03687	DTW domain-containing protein	1	chr1	918299	920507	9.32781	9.46454	9.56992	9.42895	9.34463	9.42625	9.36407	9.2906	9.20664	9.45409	9.39994	9.2871	-0.0541511	0.531308	0.449801	-0.166991	0.127921	0.251227
AT1G03700	Uncharacterised protein family (UPF0497)	1	chr1	920950	921901	9.76729	9.68708	9.06813	9.13909	9.00056	9.01547	9.60277	9.8678	9.82311	9.5075	9.05171	9.76456	-0.455795	0.170908	0.289171	0.257062	0.367817	0.360997
AT1G03710	Cystatin/monellin superfamily protein	1	chr1	923426	924726	5.78926	5.90708	5.86681	6.4121	6.44246	6.41297	5.69175	5.95237	5.76934	5.85438	6.42251	5.80448	0.568129	0.00201567	0.0963201	-0.0498964	0.600131	0.443	1
AT1G03720	Cysteine proteinases superfamily protein	0	chr1	924996	926373	6.05179	5.77317	6.13354	5.74056	5.54403	5.50528	5.45761	5.83014	5.23525	5.98617	5.59662	5.50767	-0.389543	0.0488904	0.198383	-0.478498	0.092204	0.232056
AT1G03730		0	chr1	930828	931895	10.3228	10.2397	10.1895	10.4435	10.3476	10.4927	10.5084	10.4879	10.5348	10.2507	10.4279	10.5104	0.177275	0.0375509	0.18422	0.259686	0.0138555	0.173956
AT_1_-_0_932682-932831		0	chr1	932682	932831	5.00954	5.16124	5.147	4.92797	5.27732	5.18126	5.60488	5.03431	5.22081	5.10593	5.12885	5.28667	0.0229176	0.855366	0.552295	0.180738	0.396365	0.37221
AT1G03740	Protein kinase superfamily protein	1	chr1	933512	937043	10.8865	10.9931	10.6723	11.2043	11.1427	11.1566	11.0124	11.0759	11.276	10.8506	11.1679	11.1214	0.31725	0.0729936	0.221496	0.270831	0.0949506	0.233717
AT1G03743	snoRNA	0	chr1	937207	937287	10.0419	9.87074	9.69447	9.55742	9.81213	9.45801	10.0724	9.40136	9.62482	9.86904	9.60919	9.69954	-0.259851	0.148909	0.276057	-0.1695	0.500037	0.409413
AT1G03746	snoRNA	0	chr1	937401	937485	9.71202	9.46593	9.2008	9.12424	9.47257	9.06112	9.92049	9.4133	9.81991	9.45958	9.21931	9.7179	-0.240277	0.287325	0.349338	0.258313	0.294193	0.330905
AT1G03750	switch 2	1	chr1	937920	941162	8.05304	8.13296	8.14043	8.10759	8.26394	8.18921	8.12681	8.08163	8.12401	8.10881	8.18691	8.11082	0.0781028	0.228839	0.319854	0.00200863	0.95323	0.546761
AT1G03760	Prefoldin chaperone subunit family protein	0	chr1	941062	943377	9.16836	9.16463	9.2902	9.32811	9.26463	9.35918	9.06142	9.08518	8.91737	9.20773	9.31731	9.02132	0.109578	0.10191	0.244679	-0.186407	0.0521941	0.206305
AT1G03770	RING 1B	1	chr1	944572	947483	6.63542	6.7976	6.88353	7.01425	6.80646	6.90524	6.70775	6.84671	6.84311	6.77218	6.90865	6.79919	0.136469	0.223866	0.317605	0.0270075	0.771761	0.497156
AT1G03780	targeting protein for XKLP2	0	chr1	947520	951827	6.8423	7.05164	7.19768	6.99236	6.80879	6.99668	6.9377	7.0872	6.68993	7.03054	6.93261	6.90494	-0.0979323	0.470576	0.426597	-0.125599	0.464051	0.396482
AT1G03790	Zinc finger C-x8-C-x5-C-x3-H type family protein	1	chr1	954525	956097	5.56315	6.03489	6.10487	5.93809	5.57549	5.22877	6.34101	6.59065	6.98038	5.90097	5.58078	6.63735	-0.320184	0.297473	0.353927	0.736382	0.0436172	0.200964
AT1G03800	ERF domain protein 10	0	chr1	957261	957998	5.28186	5.43942	5.39712	5.40881	5.05792	5.14703	5.31574	5.41511	4.82215	5.3728	5.20459	5.18433	-0.168213	0.248032	0.329585	-0.188465	0.413741	0.378832
AT1G03810	Nucleic acid-binding, OB-fold-like protein	1	chr1	958759	959609	5.55189	5.4378	5.46411	5.44594	5.49624	5.08509	5.08559	5.09123	5.21058	5.4846	5.34242	5.12913	-0.14218	0.387894	0.394038	-0.355468	0.00290806	0.126725
AT1G03820		0	chr1	959869	960728	11.3598	11.2711	11.5866	11.7033	11.5315	11.4649	11.3975	11.356	11.0591	11.4058	11.5666	11.2709	0.160755	0.24885	0.330177	-0.134953	0.396729	0.372342
AT1G03830	guanylate-binding family protein	0	chr1	962016	966757	6.15071	5.97233	6.46529	5.94772	6.05481	6.07177	6.03014	5.99612	5.85606	6.19611	6.02477	5.96077	-0.171345	0.356721	0.380726	-0.235338	0.23901	0.306961
AT1G03840	C2H2 and C2HC zinc fingers superfamily protein	0	chr1	967503	970130	10.0379	10.2613	10.2251	9.87913	9.79088	10.0299	9.8031	9.74819	9.44721	10.1747	9.89995	9.66617	-0.274787	0.0490104	0.198403	-0.508574	0.0244023	0.186969
AT1G03850	Glutaredoxin family protein	0	chr1	976097	977761	12.4437	12.0666	11.7213	12.9358	13.0016	12.9752	12.9012	12.7676	12.8829	12.0772	12.9709	12.8506	0.893689	0.0493281	0.198735	0.773401	0.0605378	0.213298
AT1G03860	prohibitin 2	0	chr1	979308	981885	12.3583	12.6424	12.7616	12.5375	12.411	12.6287	12.4165	12.4558	12.1067	12.5874	12.5258	12.3263	-0.0616706	0.679072	0.499921	-0.261074	0.184454	0.281331
AT1G03870	FASCICLIN-like arabinoogalactan 9	0	chr1	982506	983540	14.6085	14.6697	14.5544	14.5089	14.4434	14.6206	14.4006	14.5326	14.3372	14.6108	14.5243	14.4235	-0.0865492	0.243557	0.327324	-0.187373	0.061964	0.213967
AT1G03880	cruciferin 2	1	chr1	985751	988146	4.91118	4.9389	4.77089	5.07923	4.79366	4.84208	4.94753	4.85669	4.81449	4.87366	4.90499	4.8729	0.0313358	0.778254	0.530567	-0.000753908	0.991361	0.556207
AT1G03890	RmlC-like cupins superfamily protein	1	chr1	989198	991020	4.19815	4.55042	4.60807	4.44548	4.39595	4.87156	4.31262	4.48515	4.48892	4.45222	4.571	4.4289	0.118781	0.581701	0.467772	-0.0233198	0.87963	0.527071
AT1G03900	non-intrinsic ABC protein 4	1	chr1	991139	993118	12.8373	12.881	12.8665	12.9311	12.881	12.8936	12.7686	12.8483	12.7534	12.8616	12.9019	12.7901	0.0402805	0.113039	0.252041	-0.0715014	0.120964	0.246293
AT1G03905	P-loop containing nucleoside triphosphate hydrolases superfamily protein	1	chr1	993400	995784	9.30296	9.19886	9.19484	9.08421	9.20377	9.20161	9.5516	9.58734	9.49824	9.23222	9.1632	9.54573	-0.0690214	0.263766	0.33815	0.313507	0.00280686	0.125822
AT1G03910		1	chr1	996115	1000437	10.8678	10.992	11.1833	10.9888	10.9702	10.898	11.0269	11.0499	10.6111	11.0144	10.9523	10.896	-0.0620494	0.574628	0.465239	-0.118385	0.529631	0.4203
AT1G03920	Protein kinase family protein	1	chr1	1001321	1004383	7.85459	7.73866	7.76111	7.90099	7.92325	7.77032	7.64886	7.60179	7.94565	7.78479	7.86485	7.7321	0.0800643	0.254797	0.333239	-0.0526854	0.680443	0.469937
AT1G03930	dual specificity kinase 1	1	chr1	1004769	1008370	5.64953	5.56829	5.78957	5.75489	5.71973	5.71835	5.87364	5.89067	6.13921	5.66913	5.73099	5.96784	0.0618587	0.440437	0.414799	0.298709	0.0541044	0.207877
AT1G03935	snoRNA	1	chr1	1008810	1008896	10.8379	10.4029	10.257	10.413	10.7623	10.5207	10.9962	10.5886	10.8744	10.4993	10.5653	10.8197	0.0660813	0.764347	0.526368	0.320465	0.214046	0.295335
AT1G03940	HXXXD-type acyl-transferase family protein	0	chr1	1009542	1011056	5.73662	5.31643	5.41175	5.40901	5.53905	5.65331	5.02434	5.7007	5.31305	5.48827	5.53379	5.34603	0.0455219	0.774042	0.529505	-0.142239	0.580574	0.436355
AT1G03950	vacuolar protein sorting-associated protein 2.3	0	chr1	1011172	1013365	9.63563	9.56055	9.38044	9.57365	9.72496	9.54614	9.82245	9.92451	10.1197	9.52554	9.61492	9.95556	0.0893784	0.399706	0.398659	0.43002	0.0211351	0.182773
AT1G03960	Calcium-binding EF hand family protein	1	chr1	1013715	1017929	8.20167	8.29921	8.38959	8.29306	8.3075	8.37223	8.24513	8.23926	8.35825	8.29683	8.32426	8.28088	0.0274352	0.678314	0.499643	-0.0159461	0.823871	0.511458
AT1G03970	G-box binding factor 4	1	chr1	1018100	1019247	10.1299	10.1554	10.165	10.5124	10.4996	10.4584	10.376	10.3623	10.3388	10.1501	10.4901	10.359	0.339992	0.000180948	0.0646378	0.2089	0.000159689	0.0729662
AT1G03980	phytochelatin synthase 2	0	chr1	1018570	1022108	6.73721	6.57881	6.57353	6.57221	6.64874	6.36981	6.60893	6.54872	6.75144	6.62985	6.53025	6.63637	-0.0995961	0.380326	0.390235	0.00651626	0.939494	0.543644
AT1G03982	PAK-box/P21-Rho-binding family protein	0	chr1	1022251	1023719	5.91795	5.76934	5.71408	5.81239	5.76753	6.1212	5.8853	5.541	5.60499	5.80046	5.90037	5.6771	0.0999152	0.486359	0.432762	-0.123356	0.382303	0.367319
AT1G03990	Long-chain fatty alcohol dehydrogenase family protein	1	chr1	1024847	1027616	5.58201	5.62002	5.53013	5.60135	5.36923	5.13669	5.41515	5.8068	5.67099	5.57739	5.36909	5.63098	-0.208297	0.258411	0.335001	0.0535917	0.689898	0.472587
AT1G04000		0	chr1	1028106	1029119	7.92009	7.96573	7.99154	8.02204	7.97069	8.11086	8.01893	8.06596	7.95664	7.95912	8.03453	8.01384	0.0754107	0.200151	0.305161	0.0547213	0.233044	0.304009
AT1G04010	phospholipid sterol acyl transferase 1	0	chr1	1031200	1036237	8.49615	8.62107	8.65028	8.59059	8.41865	8.52521	8.60933	8.49344	8.28871	8.58917	8.51148	8.46382	-0.0776836	0.322693	0.36569	-0.125342	0.319449	0.341095
AT1G04020	breast cancer associated RING 1	1	chr1	1036537	1040224	7.59512	7.77658	7.75609	7.56606	7.70816	7.55745	7.63112	7.59358	7.51692	7.70927	7.61056	7.58054	-0.0987075	0.262102	0.337372	-0.128724	0.141806	0.259083
AT1G04030		1	chr1	1040383	1042892	7.66337	7.89998	7.78353	7.97725	8.02262	7.94973	7.90338	8.08886	8.00999	7.78229	7.9832	8.00074	0.200906	0.0877143	0.232606	0.218449	0.0692553	0.218434
AT1G04040	HAD superfamily, subfamily IIIB acid phosphatase	0	chr1	1042362	1043864	13.3096	13.3859	13.3456	13.042	12.9955	13.0346	13.015	13.0069	12.8258	13.3471	13.0241	12.9492	-0.32299	0.00057422	0.0795089	-0.397851	0.0148731	0.173956
AT1G04050	homolog of SU(var)3-9 1	0	chr1	1045598	1049297	7.03905	7.34743	7.36537	7.34743	7.1867	7.17665	7.20539	7.35576	7.09075	7.25062	7.23692	7.2173	-0.0136923	0.915973	0.568335	-0.033315	0.812643	0.50818
AT1G04070	translocase of outer membrane 22-I	0	chr1	1050553	1051186	6.8909	7.26834	7.03351	7.13309	7.1187	7.16746	7.23156	7.09123	7.27361	7.06425	7.13975	7.1988	0.0754992	0.564465	0.461498	0.134548	0.355585	0.35568
AT1G04080	Tetratricopeptide repeat (TPR)-like superfamily protein	1	chr1	1051312	1056827	10.1197	10.2526	10.3452	10.1065	10.1365	10.2029	10.2763	10.2493	10.1849	10.2392	10.1486	10.2368	-0.0905666	0.301814	0.356373	-0.00238762	0.975472	0.552623
AT1G04090	Plant protein of unknown function (DUF946)	1	chr1	1057151	1059419	5.82143	6.28049	6.0982	6.1756	6.03032	5.94628	6.26531	6.44053	6.35998	6.06671	6.05074	6.35527	-0.015973	0.921674	0.57004	0.288565	0.1518	0.264161
AT1G04100	indoleacetic acid-induced protein 10	1	chr1	1059506	1061191	6.73124	6.78659	6.58237	7.14594	6.96421	6.94511	7.3928	7.46376	7.17508	6.70007	7.01842	7.34388	0.318355	0.0228199	0.161381	0.643814	0.00526927	0.147111
AT1G04110	Subtilase family protein	0	chr1	1061457	1063784	4.57177	4.83194	4.83824	5.05752	4.95151	4.98951	4.79949	5.0928	4.94391	4.74732	4.99951	4.9454	0.252198	0.0896758	0.234279	0.19808	0.179799	0.278832
AT1G04120	multidrug resistance-associated protein 5	0	chr1	1064450	1071047	8.7772	8.83644	8.874	8.72814	8.60517	8.60827	8.8165	8.84518	8.59454	8.82921	8.6472	8.75207	-0.182016	0.0256369	0.166658	-0.0771407	0.438558	0.387381
AT1G04130	Tetratricopeptide repeat (TPR)-like superfamily protein	1	chr1	1073427	1075568	8.21834	8.3067	8.33366	8.25426	8.15884	8.32298	8.15848	8.1416	8.00022	8.28623	8.24536	8.1001	-0.040872	0.529689	0.449248	-0.186131	0.0443517	0.201254
AT1G04140	Transducin family protein / WD-40 repeat family protein	0	chr1	1075543	1080630	9.60881	9.53611	9.6118	9.62685	9.60164	9.57117	9.4427	9.46491	9.48886	9.58557	9.59989	9.46549	0.0143146	0.657028	0.492459	-0.120081	0.0224763	0.184451
AT1G04150	C2 calcium/lipid-binding plant phosphoribosyltransferase family protein	0	chr1	1081208	1084246	6.03087	6.09227	6.11553	6.04627	5.24938	5.59965	5.70672	5.81745	5.74698	6.07956	5.63176	5.75705	-0.447793	0.190341	0.29995	-0.322509	0.00179101	0.116328
AT1G04160	myosin XI B	1	chr1	1086495	1096146	9.01287	9.17974	8.95849	8.73952	8.6566	8.76441	9.03644	9.07033	8.99196	9.05037	8.72018	9.03291	-0.330189	0.0224925	0.161081	-0.0174597	0.823175	0.51128
AT1G04170	eukaryotic translation initiation factor 2 gamma subunit	1	chr1	1096946	1099898	12.2838	12.5163	12.591	12.2758	12.2877	12.4012	12.2769	12.3426	12.1884	12.4637	12.3216	12.2693	-0.142134	0.261816	0.337197	-0.194424	0.158369	0.268295
AT1G04171		0	chr1	1100444	1100608	5.3204	5.26387	5.37664	5.25847	5.47109	5.13828	5.43598	5.06679	5.28825	5.3203	5.28928	5.26367	-0.0310205	0.786253	0.532593	-0.0566252	0.656704	0.462166
AT1G04180	YUCCA 9	1	chr1	1104623	1105988	7.67221	7.6931	7.65545	7.43524	7.35011	7.63744	7.27628	7.44123	7.55941	7.67359	7.47426	7.42564	-0.199323	0.142101	0.272572	-0.247949	0.0918976	0.231796
AT1G04190	Tetratricopeptide repeat (TPR)-like superfamily protein	0	chr1	1106428	1108715	10.4839	10.6195	10.7908	10.4612	10.4742	10.6234	10.6211	10.6378	10.2714	10.6314	10.5196	10.5101	-0.11177	0.351784	0.378599	-0.121309	0.464304	0.396531
AT1G04200		1	chr1	1109482	1114107	7.21193	7.34567	7.42908	7.20435	7.20304	7.17074	7.47779	7.48341	7.37613	7.32889	7.19271	7.44578	-0.136181	0.160635	0.284206	0.116886	0.20069	0.289827
AT1G04210	Leucine-rich repeat protein kinase family protein	1	chr1	1114405	1119739	6.24293	6.48172	6.67374	6.58439	6.54776	6.54103	6.44679	6.67335	6.75398	6.46613	6.55773	6.62471	0.0915948	0.539404	0.453253	0.15858	0.368366	0.361277
AT1G04220	3-ketoacyl-CoA synthase 2	0	chr1	1119699	1122526	12.1867	12.1854	11.8912	11.6235	11.5557	11.5557	11.771	11.9425	11.9432	12.0878	11.5783	11.8856	-0.509473	0.0299966	0.174089	-0.202236	0.167237	0.272542
AT1G04230	Protein of unknown function (DUF2361)	1	chr1	1125518	1128168	7.14117	7.22283	7.14445	7.41396	7.23515	7.41677	7.3081	7.32177	7.42749	7.16948	7.35529	7.35245	0.185808	0.0731433	0.221613	0.182968	0.02043	0.182364
AT1G04240	AUX/IAA transcriptional regulator family protein	0	chr1	1128188	1129551	10.0177	9.92605	10.1952	9.86045	9.88908	9.96757	10.3464	10.2297	10.2935	10.0463	9.9057	10.2899	-0.140593	0.209829	0.310361	0.243581	0.0743046	0.220894
AT1G04250	AUX/IAA transcriptional regulator family protein	1	chr1	1136258	1138613	13.0813	12.9798	13.0244	13.1375	13.075	13.0414	12.8885	13.0056	13.0016	13.0285	13.0846	12.9652	0.056066	0.240315	0.325833	-0.0633153	0.264567	0.318577
AT1G04260	CAMV movement protein interacting protein 7	0	chr1	1140528	1141365	8.62143	8.60131	8.62379	8.75906	8.55876	8.72655	8.67806	8.76133	8.65194	8.61551	8.68146	8.69711	0.0659467	0.39938	0.398471	0.0815992	0.126048	0.250067
AT1G04270	cytosolic ribosomal protein S15	0	chr1	1141604	1143053	13.217	13.2115	13.3859	13.0832	13.0143	13.1552	13.1375	13.1305	13.0473	13.2715	13.0842	13.1051	-0.187228	0.0623819	0.211891	-0.166363	0.0819145	0.226146
AT1G04280	P-loop containing nucleoside triphosphate hydrolases superfamily protein	0	chr1	1143436	1146654	5.91421	6.19711	6.10894	6.02858	6.25981	6.07952	6.26173	6.20393	6.4447	6.07342	6.12263	6.30345	0.0492169	0.67597	0.498846	0.230033	0.107596	0.240971
AT1G04290	Thioesterase superfamily protein	0	chr1	1147523	1148533	10.9104	10.9034	10.817	10.8446	10.9009	10.9013	10.8873	10.911	10.9192	10.8769	10.8823	10.9058	0.00532354	0.889273	0.561661	0.0288892	0.442155	0.388753
AT1G04295	other RNA	1	chr1	1147781	1148435	7.94886	7.92478	7.99355	7.84243	7.81512	7.8524	8.07315	7.87663	7.7158	7.95573	7.83665	7.88853	-0.119081	0.0127361	0.140867	-0.0672011	0.584531	0.437647
AT1G04300	TRAF-like superfamily protein	0	chr1	1148597	1154652	7.85645	8.07958	8.09664	7.85435	8.05849	8.02949	7.98541	8.14261	7.96383	8.01089	7.98078	8.03062	-0.0301116	0.779412	0.530874	0.0197282	0.847669	0.518287
AT1G04310	ethylene response sensor 2	0	chr1	1154764	1157711	5.88526	6.13908	5.96254	6.00019	6.3428	5.96284	5.74318	5.65729	5.77212	5.99563	6.10194	5.7242	0.106317	0.504177	0.440292	-0.271427	0.0509291	0.205535
AT1G04320	pre-tRNA	1	chr1	1159023	1159093	10.8757	10.636	10.6411	10.7351	10.8344	10.6244	11.1883	10.5452	10.65	10.7176	10.7313	10.7945	0.0136717	0.897901	0.564166	0.0768958	0.746736	0.490193
AT1G04330		0	chr1	1161311	1161982	9.28969	9.44884	9.07467	8.99098	8.94312	9.0205	8.02761	8.21382	8.37314	9.27107	8.98486	8.20486	-0.286205	0.112955	0.251987	-1.06621	0.00198802	0.119811
AT1G04340	HR-like lesion-inducing protein-related	0	chr1	1163097	1164851	11.3007	11.352	11.3038	11.2017	11.1666	11.2693	11.2805	11.3057	10.9942	11.3189	11.2125	11.1935	-0.106324	0.0511977	0.20094	-0.125406	0.3356	0.347336
AT1G04350	2-oxoglutarate (2OG) and Fe(II)-dependent oxygenase superfamily protein	1	chr1	1165165	1166768	8.56989	8.16732	8.29022	8.63536	8.56904	8.57465	8.04989	8.34985	8.37402	8.34248	8.59302	8.25792	0.250537	0.166543	0.287386	-0.0845591	0.621976	0.450332
AT1G04360	RING/U-box superfamily protein	0	chr1	1167457	1168878	8.34176	8.31521	8.0898	8.17042	8.13743	8.13908	8.3581	8.56934	8.50085	8.24892	8.14898	8.4761	-0.0999442	0.33721	0.37263	0.227175	0.092396	0.232341
AT_1_+_1_1170737-1170865		1	chr1	1170738	1170866	4.96385	4.7877	4.45213	5.11765	5.09305	4.66961	4.83084	4.99646	4.81239	4.73456	4.9601	4.8799	0.225541	0.34128	0.374319	0.145335	0.44277	0.388967
AT1G04370	Ethylene-responsive element binding factor 14	1	chr1	1175177	1175578	5.25522	4.88587	5.16957	5.35585	5.42577	5.32208	5.32199	5.42918	5.29871	5.10355	5.3679	5.34996	0.264348	0.133181	0.266575	0.246408	0.146911	0.261396
AT1G04380	2-oxoglutarate (2OG) and Fe(II)-dependent oxygenase superfamily protein	0	chr1	1176921	1178407	6.49485	6.55982	6.45777	6.83543	6.95035	6.70725	6.50596	6.84963	6.91486	6.50415	6.83101	6.75681	0.326861	0.0288197	0.17146	0.252668	0.179236	0.27853
AT1G04390	BTB/POZ domain-containing protein	0	chr1	1179363	1183704	7.20634	7.24598	7.11243	7.3384	7.20819	7.27926	7.32576	7.23042	7.38962	7.18825	7.27528	7.31527	0.0870287	0.186573	0.297673	0.127017	0.10696	0.240643
gb__EG518955		1	chr1	1184595	1184961	4.4986	4.56107	4.45057	4.65522	4.41869	4.22713	4.11693	4.65048	4.72891	4.50341	4.43368	4.49877	-0.0697331	0.634485	0.48528	-0.00464	0.983068	0.55422
AT_1_-_2_1184749-1184961		0	chr1	1184750	1184962	4.67896	5.06322	4.95573	4.52034	4.72516	4.79134	4.74291	4.62971	5.19649	4.8993	4.67895	4.85637	-0.220351	0.199453	0.304918	-0.0429267	0.847731	0.518297
AT1G04400	cryptochrome 2	0	chr1	1185550	1188517	11.6102	11.6764	11.6014	11.6915	11.7893	11.7561	11.8297	11.7793	11.8062	11.6293	11.7456	11.805	0.116306	0.0371032	0.183554	0.175738	0.00584209	0.150915
AT1G04410	Lactate/malate dehydrogenase family protein	0	chr1	1189078	1191412	11.9382	12.1478	12.1815	12.1824	12.0117	12.1543	12.3146	12.3138	12.1367	12.0892	12.1161	12.255	0.0269423	0.787329	0.532932	0.165835	0.164807	0.27177
AT1G04420	NAD(P)-linked oxidoreductase superfamily protein	1	chr1	1191608	1193884	8.015	8.19716	8.13936	8.34124	8.27986	8.17307	8.34045	8.34565	8.36137	8.11717	8.26472	8.34916	0.147553	0.113245	0.252263	0.231984	0.0479727	0.203411
AT1G04425	other RNA	1	chr1	1194187	1196889	8.51654	8.69701	8.8115	8.36764	8.40931	8.37314	9.04044	8.93497	8.60517	8.67502	8.38336	8.86019	-0.291652	0.0736279	0.221894	0.185177	0.312347	0.33847
AT1G04430	S-adenosyl-L-methionine-dependent methyltransferases superfamily protein	1	chr1	1198118	1201527	10.2608	10.4381	10.3586	10.2091	10.066	10.178	10.3342	10.3838	10.0296	10.3525	10.151	10.2492	-0.20143	0.0414372	0.188858	-0.103245	0.463187	0.396064
AT1G04440	casein kinase like 13	1	chr1	1202255	1205803	12.5969	12.6768	12.6182	12.8373	12.6976	12.7921	12.8821	12.9433	12.9121	12.6306	12.7757	12.9125	0.145064	0.0508724	0.200538	0.281915	0.00101295	0.102787
AT1G04445	C2H2-like zinc finger protein	1	chr1	1207344	1207862	5.53731	5.59134	5.27771	5.86964	5.81273	5.76025	5.69611	5.70982	5.77744	5.46879	5.81421	5.72779	0.345417	0.05868	0.208603	0.259001	0.107764	0.241103
AT1G04450	ROP-interactive CRIB motif-containing protein 3	1	chr1	1208521	1209874	5.24608	4.91323	5.26309	5.08379	5.47124	5.4612	5.15234	5.66966	5.17926	5.1408	5.33874	5.33375	0.197941	0.312131	0.361139	0.192951	0.402671	0.37492
AT1G04457		0	chr1	1210319	1210549	6.35401	6.23111	6.33212	6.54368	6.56655	6.46809	6.21734	6.57041	6.91558	6.30575	6.5261	6.56778	0.220357	0.0115856	0.13835	0.262028	0.322394	0.342234
AT1G04470	Protein of unknown function (DUF810)	0	chr1	1211049	1214662	5.07675	4.78108	4.91437	4.90029	4.52042	4.84452	5.06675	4.66042	4.8624	4.92407	4.75508	4.86319	-0.16899	0.317534	0.363688	-0.0608737	0.698378	0.475304
AT1G04480	Ribosomal protein L14p/L23e family protein	1	chr1	1216095	1217467	15.6018	15.7578	15.8192	15.5757	15.4686	15.8192	15.7115	15.7492	15.24	15.7263	15.6212	15.5669	-0.105083	0.447174	0.417719	-0.159346	0.441277	0.3884
AT1G04490	Protein of unknown function (DUF3527)	0	chr1	1217948	1220137	8.2187	7.96725	7.94845	8.27866	8.29284	8.38709	8.44894	8.41913	8.50363	8.0448	8.31953	8.45723	0.274733	0.072392	0.221137	0.412436	0.0337807	0.193063
AT1G04500	CCT motif family protein	0	chr1	1221433	1224366	5.04562	5.32946	4.92945	5.38389	5.28879	5.25021	5.29958	5.22336	4.88039	5.10151	5.30763	5.13444	0.206119	0.218723	0.314776	0.0329307	0.860204	0.521791
AT1G04501		1	chr1	1224552	1224680	4.67389	4.63639	4.87124	4.66655	5.20407	4.87063	5.24058	4.80227	4.71121	4.72717	4.91375	4.91802	0.186575	0.363611	0.383814	0.190846	0.370281	0.362175
AT1G04510	MOS4-associated complex 3A	1	chr1	1226575	1230827	10.402	10.553	10.6347	10.4253	10.346	10.3979	10.4484	10.5134	10.3518	10.5299	10.3898	10.4378	-0.140141	0.166673	0.287386	-0.0920609	0.335547	0.347327
AT1G04520	plasmodesmata-located protein 2	1	chr1	1231578	1234032	8.27607	8.53794	8.59683	8.39665	8.29531	8.49936	8.3766	8.43429	8.30418	8.47028	8.39711	8.37169	-0.0731744	0.565874	0.461994	-0.0985941	0.42931	0.384055
AT1G04530	Tetratricopeptide repeat (TPR)-like superfamily protein	0	chr1	1234176	1236034	9.32422	9.41739	9.31288	9.47604	9.33773	9.53611	9.47582	9.60312	9.78445	9.3515	9.44996	9.62113	0.0984589	0.23603	0.323492	0.269629	0.0807719	0.225315
AT1G04540	Calcium-dependent lipid-binding (CaLB domain) family protein	1	chr1	1237256	1239061	5.15704	5.50965	5.22774	5.47677	5.33961	5.20074	5.42994	5.31494	5.52151	5.29814	5.33904	5.42213	0.0408973	0.776629	0.530119	0.123989	0.385583	0.368529
AT_1_+_1_1239848-1239949		1	chr1	1239849	1239950	5.19588	5.03076	5.19481	5.23274	5.21887	5.7103	5.37072	5.05469	4.90131	5.14048	5.3873	5.10891	0.246819	0.262573	0.337673	-0.0315738	0.847277	0.518219
AT1G04550	AUX/IAA transcriptional regulator family protein	1	chr1	1240375	1242121	10.4248	10.5042	10.563	10.6643	10.5445	10.5591	10.4083	10.5788	10.5689	10.4973	10.5893	10.5187	0.0919922	0.170011	0.288796	0.0213658	0.771291	0.497064
AT1G04555		1	chr1	1242558	1244244	6.28695	6.32614	6.19298	6.47939	6.14519	6.03036	6.07355	5.89408	6.08969	6.26869	6.21831	6.01911	-0.0503783	0.749481	0.521616	-0.249582	0.0364516	0.195165
AT1G04560	AWPM-19-like family protein	1	chr1	1244947	1246059	5.08525	5.56573	6.22614	6.3047	6.3233	5.34938	5.41849	5.73097	6.42138	5.62571	5.99246	5.85695	0.366756	0.471114	0.426796	0.23124	0.630325	0.453481
AT1G04570	Major facilitator superfamily protein	0	chr1	1246728	1248775	6.33148	6.5101	6.64585	6.63348	6.52947	6.53524	6.27876	6.37692	6.53315	6.49581	6.56606	6.39628	0.0702568	0.530146	0.449344	-0.0995305	0.446	0.390422
CUFF.1745		0	chr1	1251405	1251616	5.42706	5.62833	5.54734	5.5551	5.56288	5.49365	5.5199	5.32361	5.09891	5.53424	5.53721	5.31414	0.00296329	0.96561	0.580952	-0.220102	0.205211	0.291524
AT1G04580	aldehyde oxidase 4	0	chr1	1252122	1257510	5.46647	5.45195	5.45258	5.45917	5.52958	5.61475	5.53445	5.58874	5.23216	5.457	5.5345	5.45179	0.0775018	0.226041	0.318727	-0.00521374	0.966799	0.550237
AT1G04590		0	chr1	1258577	1261426	9.25857	9.03597	9.2518	9.01929	8.96627	9.07252	8.91594	8.96059	9.058	9.18211	9.01936	8.97818	-0.16275	0.143053	0.273149	-0.203935	0.0891071	0.230184
AT1G04600	myosin XI A	1	chr1	1262123	1272376	6.00183	5.90483	6.09569	5.93917	5.93835	5.90814	5.7039	5.77347	5.82268	6.00078	5.92855	5.76668	-0.0722262	0.319293	0.364456	-0.234095	0.0304993	0.190055
AT_1_+_2_1276911-1277096		1	chr1	1276912	1277097	5.60639	5.45751	5.50393	5.60248	5.67662	5.42607	5.46886	5.26495	5.2478	5.52261	5.56839	5.3272	0.0457796	0.630111	0.483376	-0.195408	0.0924115	0.232352
AT1G04610	YUCCA 3	1	chr1	1279388	1281618	9.27872	9.36829	9.53082	9.07572	9.12573	9.10398	9.16013	9.14987	9.12921	9.39261	9.10181	9.1464	-0.2908	0.0539539	0.203897	-0.246209	0.0771399	0.22245
AT1G04620	coenzyme F420 hydrogenase family / dehydrogenase, beta subunit family	0	chr1	1282741	1286584	5.485	5.67461	5.70274	6.00879	5.97009	6.02878	5.889	6.41133	5.57055	5.62078	6.00255	5.95696	0.381772	0.0248686	0.164888	0.336178	0.302082	0.334244
AT_1_-_1_1287242-1287343		0	chr1	1287243	1287344	4.99216	5.00569	4.9586	5.15222	4.92284	4.87519	4.96577	5.02129	4.82356	4.98549	4.98342	4.93687	-0.00206897	0.983021	0.585047	-0.0486127	0.498628	0.408725
AT1G04625	Polynucleotidyl transferase, ribonuclease H-like superfamily protein	0	chr1	1287831	1289820	5.5469	5.5053	5.356	5.92944	5.61402	5.44002	5.01847	5.95062	5.557	5.4694	5.66116	5.5087	0.191763	0.313531	0.36167	0.0392971	0.89896	0.53284
AT1G04630	GRIM-19 protein	0	chr1	1289734	1291112	11.9966	11.7553	11.9325	11.8667	11.8937	11.9353	11.8453	11.8595	11.9997	11.8948	11.8986	11.9015	0.00375036	0.96406	0.580372	0.00670478	0.942982	0.544516
AT1G04635	ribonuclease P family protein / Rpp14 family protein	1	chr1	1291314	1291995	7.92467	8.14576	8.24485	8.09609	8.04022	8.11769	8.10555	8.21142	8.24956	8.1051	8.08466	8.18884	-0.0204317	0.851443	0.551243	0.0837457	0.483434	0.403644
AT1G04640	lipoyltransferase 2	1	chr1	1292080	1293357	8.74467	8.72687	8.82341	9.06356	9.03946	9.06419	9.10637	9.15538	9.238	8.76498	9.05574	9.16658	0.290755	0.00688484	0.122113	0.401598	0.00151477	0.109029
AT1G04645	Plant self-incompatibility protein S1 family	0	chr1	1293770	1294263	5.02702	4.90163	4.93838	4.85082	5.01469	4.90596	4.93886	5.23305	4.92276	4.95568	4.92382	5.03156	-0.0318535	0.629958	0.483344	0.0758831	0.539561	0.423427
AT1G04650		0	chr1	1294893	1299002	6.82467	7.06868	7.18157	7.20865	7.01244	7.04064	7.12617	6.85764	7.12331	7.02497	7.08724	7.03571	0.0622703	0.642335	0.487961	0.0107378	0.941778	0.544228
AT1G04660	glycine-rich protein	0	chr1	1300486	1301773	6.377	6.70943	6.49846	6.40679	6.43157	6.25746	6.71588	6.55571	7.0024	6.5283	6.36527	6.758	-0.163027	0.235283	0.323171	0.229696	0.236686	0.305771
AT1G04670		1	chr1	1301861	1302724	4.76195	4.99617	4.59349	5.05564	5.26283	5.35149	5.16293	5.23457	5.16706	4.78387	5.22332	5.18818	0.439448	0.0435557	0.191725	0.404311	0.0690547	0.218332
AT1G04680	Pectin lyase-like superfamily protein	0	chr1	1303529	1307884	7.86565	8.13474	8.25109	7.98946	7.92209	7.87663	8.14609	8.12699	7.92709	8.08383	7.92939	8.06673	-0.15443	0.307273	0.358836	-0.0170999	0.905745	0.534559
AT1G04684		0	chr1	1310430	1310579	6.80346	6.47282	6.78912	6.39648	6.49434	6.59044	6.54803	6.01275	6.47808	6.68847	6.49375	6.34629	-0.194714	0.207411	0.308903	-0.34218	0.173952	0.276289
AT1G04690	potassium channel beta subunit 1	1	chr1	1313564	1315750	10.3306	10.4513	10.5597	10.4386	10.3385	10.4369	10.4188	10.4946	10.1712	10.4472	10.4047	10.3615	-0.0425236	0.606452	0.476199	-0.0856445	0.513072	0.41449
AT1G04700	PB1 domain-containing protein tyrosine kinase	1	chr1	1316254	1320919	6.61004	6.86364	6.5636	6.74733	6.66818	6.45004	6.71737	6.89482	6.63359	6.67909	6.62185	6.74859	-0.0572417	0.67983	0.499991	0.0695001	0.597306	0.44202
AT1G04710	peroxisomal 3-ketoacyl-CoA thiolase 4	1	chr1	1321904	1324782	8.64682	8.84587	9.01869	8.8344	8.73813	8.78922	8.92608	8.87538	8.58903	8.83713	8.78725	8.79683	-0.0498811	0.69247	0.503895	-0.0403015	0.801698	0.505005
AT1G04730	P-loop containing nucleoside triphosphate hydrolases superfamily protein	0	chr1	1325296	1331086	6.69481	7.21982	7.13831	7.22213	7.10372	7.0823	7.11548	7.18385	7.02569	7.01765	7.13605	7.10834	0.118403	0.547726	0.45559	0.0906945	0.639508	0.456641
AT1G04750	vesicle-associated membrane protein 721	0	chr1	1331466	1333567	9.67622	9.69832	9.7126	9.79777	9.8465	9.83965	9.62888	9.77035	9.98684	9.69571	9.82797	9.79536	0.13226	0.00312439	0.104385	0.0996442	0.439664	0.387648
AT1G04760	vesicle-associated membrane protein 726	1	chr1	1334760	1336070	7.81767	8.01121	7.98038	7.98053	7.97767	7.79523	7.89377	8.04222	7.96355	7.93642	7.91781	7.96651	-0.0186107	0.838895	0.547413	0.0300936	0.706316	0.477917
AT1G04770	Tetratricopeptide repeat (TPR)-like superfamily protein	0	chr1	1336371	1337849	11.111	11.1004	11.1604	10.7899	10.7715	10.8208	10.4193	10.5731	10.7113	11.1239	10.794	10.5679	-0.329861	0.000212056	0.0663007	-0.556038	0.0184183	0.180256
AT1G04778		1	chr1	1339892	1340327	7.98124	7.9508	7.8575	8.00085	8.03838	7.79168	7.76183	7.94262	7.89496	7.92985	7.94364	7.86647	0.0137886	0.88221	0.559603	-0.0633792	0.39557	0.371878
AT1G04780	Ankyrin repeat family protein	0	chr1	1340669	1343584	10.7865	10.8882	10.721	10.8357	10.8196	10.8829	10.9516	10.8757	10.8638	10.7985	10.8461	10.897	0.0475045	0.439415	0.414465	0.0984695	0.171597	0.274792
AT1G04790	RING/U-box superfamily protein	1	chr1	1345036	1348451	9.79604	9.91809	9.94228	9.71979	9.74954	9.64651	9.654	9.68738	9.79696	9.88547	9.70528	9.71278	-0.180188	0.0363416	0.183011	-0.172691	0.0509274	0.205535
AT1G04800	glycine-rich protein	0	chr1	1348452	1349286	4.95782	4.87439	5.08033	5.21704	4.98025	5.17483	4.86861	5.04686	5.41257	4.97085	5.12404	5.10935	0.153193	0.182336	0.295453	0.138502	0.486494	0.404628
AT1G04810	26S proteasome regulatory complex, non-ATPase subcomplex, Rpn2/Psmd1 subunit	1	chr1	1350180	1355442	11.3228	11.4825	11.4454	11.3479	11.3466	11.3878	11.4689	11.4722	11.4313	11.4169	11.3608	11.4574	-0.0561057	0.365584	0.384431	0.0405772	0.492656	0.407041
AT1G04820	tubulin alpha-4 chain	0	chr1	1356191	1358386	12.2329	12.5085	12.6226	12.1024	11.972	12.1208	12.2663	12.2558	11.9777	12.4547	12.0651	12.1666	-0.389596	0.0621915	0.211739	-0.28806	0.12883	0.251493
AT1G04830	Ypt/Rab-GAP domain of gyp1p superfamily protein	0	chr1	1358574	1362019	8.54879	8.63757	8.56145	8.78709	8.8177	8.80778	8.70824	8.70741	8.88065	8.5826	8.80419	8.76543	0.221583	0.00962195	0.132224	0.18283	0.067803	0.217848
AT1G04840	Tetratricopeptide repeat (TPR)-like superfamily protein	0	chr1	1362867	1364962	5.44305	5.65808	5.79905	5.50567	5.51718	5.48808	5.77161	5.62827	5.64808	5.63339	5.50365	5.68266	-0.129747	0.336513	0.37237	0.0492636	0.694573	0.474208
AT1G04850	ubiquitin-associated (UBA)/TS-N domain-containing protein	0	chr1	1365118	1368844	11.5468	11.6069	11.7075	11.574	11.5694	11.5124	11.6641	11.6415	11.6802	11.6204	11.5519	11.6619	-0.0684656	0.28072	0.346668	0.04155	0.471488	0.398902
AT1G04860	ubiquitin-specific protease 2	0	chr1	1369054	1373101	6.7766	7.14586	7.0027	7.13785	7.10453	7.08363	7.18083	7.44134	7.17577	6.97505	7.10867	7.26598	0.133619	0.339362	0.373456	0.290925	0.106779	0.240419
AT1G04870	protein arginine methyltransferase 10	0	chr1	1373234	1375762	8.18858	8.33252	8.49966	8.08179	8.23028	8.22208	8.16814	8.14898	8.00957	8.34025	8.17805	8.1089	-0.162205	0.208134	0.309386	-0.231356	0.106321	0.239991
AT1G04880	HMG (high mobility group) box protein with ARID/BRIGHT DNA-binding domain	0	chr1	1375961	1379185	5.13559	5.61662	5.50654	5.52093	5.13238	5.43115	5.3633	5.03345	5.14509	5.41958	5.36149	5.18061	-0.0580953	0.772216	0.528925	-0.238973	0.253187	0.313316
AT1G04890	Protein of unknown function, DUF593	0	chr1	1380382	1382599	4.09564	4.10633	4.12412	4.56595	4.16703	4.41608	4.23866	4.34928	4.23541	4.1087	4.38302	4.27445	0.274322	0.141724	0.272506	0.165756	0.0418014	0.199669
AT_1_+_0_1383319-1383435		1	chr1	1383320	1383436	5.38058	5.17058	4.98268	4.88895	4.85033	4.97834	5.20204	5.16551	5.09198	5.17795	4.90587	5.15317	-0.272071	0.130754	0.264639	-0.0247723	0.852483	0.519793
AT1G04900	Protein of unknown function (DUF185)	1	chr1	1383841	1387895	9.64855	9.78031	9.6748	9.80562	9.67622	9.7577	9.42884	9.48181	9.45	9.70122	9.74651	9.45355	0.0452898	0.458262	0.422155	-0.247669	0.015745	0.175275
AT1G04910	O-fucosyltransferase family protein	0	chr1	1387871	1391187	10.5833	10.7151	10.794	10.4573	10.4529	10.5459	10.5509	10.5646	10.3702	10.6975	10.4853	10.4952	-0.212125	0.0554866	0.205224	-0.202231	0.082565	0.226705
AT1G04920	sucrose phosphate synthase 3F	0	chr1	1391502	1395864	5.0809	5.11883	5.20322	4.954	5.16188	5.34976	5.01644	5.18281	5.21033	5.13431	5.15521	5.13653	0.0209004	0.875239	0.557848	0.00221311	0.97679	0.552916
AT1G04930	hydroxyproline-rich glycoprotein family protein	0	chr1	1396291	1399053	6.49056	6.77022	6.77862	6.83673	6.66754	6.83517	6.54187	6.83377	6.74724	6.6798	6.77981	6.70763	0.100013	0.425697	0.409063	0.0278252	0.838955	0.51564
AT1G04945	HIT-type Zinc finger family protein	1	chr1	1399174	1403112	7.63834	7.81081	7.78266	7.8337	7.7933	7.81394	7.74474	7.84755	7.66763	7.74394	7.81365	7.7533	0.0697064	0.320853	0.365137	0.009365	0.906196	0.534618
AT1G04940	translocon at the inner envelope membrane of chloroplasts 20	1	chr1	1399182	1400770	8.13705	8.20482	8.18238	8.08551	8.12502	8.22353	8.11322	8.04669	8.05926	8.17475	8.14469	8.07306	-0.030062	0.558587	0.459446	-0.101691	0.023504	0.185557
AT1G04950	TATA BOX ASSOCIATED FACTOR II 59	0	chr1	1403085	1407501	9.86265	10.241	10.375	10.2683	10.111	10.2423	10.0583	10.0971	10.0002	10.1595	10.2072	10.0519	0.0476327	0.790974	0.533823	-0.107681	0.557342	0.429387
AT1G04960	Protein of unknown function (DUF1664)	0	chr1	1407801	1410868	7.83624	7.58008	7.55127	7.73049	7.60399	7.85731	7.85357	7.81035	7.63285	7.65587	7.7306	7.76559	0.0747314	0.557282	0.459121	0.109725	0.390573	0.370029
AT1G04970	lipid-binding serum glycoprotein family protein	1	chr1	1411170	1413627	9.95912	9.88185	9.63563	10.0556	10.0756	10.0136	9.97928	9.91055	10.1811	9.82553	10.0483	10.0237	0.222741	0.145573	0.274402	0.198125	0.195829	0.287993
AT1G04980	PDI-like 2-2	0	chr1	1413644	1416144	6.42325	6.77042	6.69339	6.68303	6.40477	6.77738	6.7888	6.4705	6.29119	6.62902	6.62173	6.51683	-0.00729119	0.96442	0.580477	-0.112189	0.569135	0.433132
AT1G04985		0	chr1	1416343	1418482	8.95441	8.84877	8.86301	9.03763	9.0209	9.0819	8.89865	8.91394	9.02651	8.88873	9.04681	8.94637	0.15808	0.0231821	0.161814	0.0576367	0.333317	0.346609
AT1G04990	Zinc finger C-x8-C-x5-C-x3-H type family protein	0	chr1	1419080	1421789	8.98233	9.07615	8.94024	9.20951	9.09684	9.18381	9.25464	9.20325	9.10961	8.99957	9.16339	9.18917	0.163817	0.0371893	0.183639	0.189595	0.0316983	0.191915
AT1G05000	Phosphotyrosine protein phosphatases superfamily protein	1	chr1	1425593	1428782	6.91558	6.97423	6.62631	6.93	7.00731	6.93711	7.21295	7.23432	7.15627	6.8387	6.95814	7.20118	0.119439	0.382874	0.391589	0.362476	0.0718153	0.219492
AT1G05010	ethylene-forming enzyme	0	chr1	1431190	1432858	7.5061	7.51395	6.94944	7.54272	7.54036	7.57163	7.64199	7.73326	7.69265	7.32316	7.55157	7.6893	0.228409	0.346044	0.376169	0.366139	0.187015	0.283031
AT1G05020	ENTH/ANTH/VHS superfamily protein	0	chr1	1435254	1437667	6.99416	7.09898	6.73933	6.90011	6.80852	7.07765	6.84963	7.10253	7.01253	6.94416	6.92876	6.98823	-0.0153976	0.91376	0.567802	0.0440726	0.7535	0.492082
AT1G05030	Major facilitator superfamily protein	0	chr1	1438152	1441417	8.75741	8.72277	8.80882	9.00445	8.9347	8.90508	8.9442	8.82349	8.77785	8.763	8.94808	8.84851	0.185076	0.00928788	0.1306	0.0855146	0.22282	0.29947
CUFF.1985		0	chr1	1441860	1442812	5.40056	5.52376	5.71408	5.55676	5.37841	5.46906	5.11179	5.33832	5.10663	5.54613	5.46808	5.18558	-0.0780557	0.507665	0.441693	-0.360556	0.0402974	0.19895
CUFF.1987		0	chr1	1442989	1445558	6.18818	5.85606	6.18719	6.0516	5.94507	5.8012	5.88697	5.76297	6.03882	6.07714	5.93262	5.89625	-0.144518	0.344724	0.375657	-0.180892	0.261652	0.317285
AT1G05040		0	chr1	1447369	1448448	5.21514	5.33932	5.20264	5.2776	5.11454	5.02757	5.08326	4.69422	4.92299	5.25236	5.1399	4.90016	-0.11246	0.272306	0.342323	-0.352205	0.0742399	0.220826
AT1G05055	general transcription factor II H2	0	chr1	1448718	1450887	8.14844	8.34124	8.2986	8.23582	8.03971	8.18702	8.16176	8.21507	7.95778	8.26276	8.15418	8.11154	-0.108578	0.261056	0.336722	-0.151226	0.202625	0.290455
AT1G05060		0	chr1	1451030	1452872	9.91375	9.5887	9.42	9.89623	9.931	9.90913	10.4981	10.6094	10.8026	9.64082	9.91212	10.6367	0.271302	0.201507	0.305857	0.995905	0.00743248	0.157665
AT1G05061		0	chr1	1453216	1454260	5.43615	5.66604	5.58899	5.87103	5.5406	5.41152	5.7186	5.32361	5.20503	5.56373	5.60772	5.41575	0.0439875	0.792388	0.534265	-0.147982	0.452132	0.39253
AT1G05065	CLAVATA3/ESR-RELATED 20	0	chr1	1454969	1455220	7.05917	7.053	7.09428	7.14699	7.24041	6.97394	7.13222	7.22577	7.22774	7.06882	7.12045	7.19525	0.0516308	0.577949	0.466381	0.126429	0.0418417	0.199669
AT1G05070	Protein of unknown function (DUF1068)	0	chr1	1457063	1458744	10.6431	10.629	10.7899	10.6381	10.6794	10.6761	10.6462	10.6294	10.6049	10.6873	10.6645	10.6268	-0.0228178	0.704901	0.507869	-0.0605022	0.360461	0.357991
AT1G05080	F-box/RNI-like/FBD-like domains-containing protein	1	chr1	1459091	1460579	5.91505	5.87492	5.82596	5.66307	5.8671	5.45134	5.8121	5.47209	5.85276	5.87198	5.6605	5.71232	-0.211474	0.216455	0.313939	-0.159659	0.315726	0.339776
AT1G05085		1	chr1	1460988	1461670	6.02979	5.98218	6.14676	5.94793	6.36885	6.2154	5.97725	5.89279	6.32821	6.05291	6.1774	6.06608	0.124488	0.425378	0.408943	0.0131744	0.932925	0.541802
AT_1_-_2_1462285-1462377		0	chr1	1462286	1462378	5.06222	4.88627	4.86117	4.66459	5.35097	4.86044	4.79396	5.05194	4.97555	4.93656	4.95867	4.94048	0.0221116	0.925668	0.570948	0.00392878	0.97039	0.551244
AT1G05090	dentin sialophosphoprotein-related	1	chr1	1463202	1465622	9.97346	9.94742	9.92795	9.94228	9.8619	9.91075	9.93828	9.8537	9.79415	9.94961	9.90498	9.86204	-0.0446335	0.190436	0.29995	-0.0875681	0.162481	0.270518
AT1G05100	mitogen-activated protein kinase kinase kinase 18	1	chr1	1469610	1470881	7.8038	7.82263	7.56918	7.31391	7.26077	7.06603	7.95381	7.8598	7.97446	7.73187	7.21357	7.92935	-0.518299	0.00966845	0.132581	0.197487	0.121713	0.246702
AT1G05120	Helicase protein with RING/U-box domain	0	chr1	1471406	1476078	10.0055	10.032	9.93926	10.0858	10.1009	10.2156	9.95298	10.0857	10.1707	9.99228	10.1341	10.0698	0.141817	0.0531917	0.202917	0.0775195	0.350737	0.354009
AT1G05135		0	chr1	1477500	1478821	8.96521	9.26641	9.21418	8.67221	8.70664	8.78719	9.06188	8.99782	9.31467	9.1486	8.72201	9.12479	-0.426588	0.0322732	0.177991	-0.0238087	0.86775	0.524125
AT1G05136		1	chr1	1478923	1479063	4.82669	4.88514	4.5174	5.05844	5.4317	5.24183	4.91228	4.91343	4.82452	4.74308	5.24399	4.88341	0.500916	0.0333097	0.179295	0.140333	0.343464	0.351241
AT1G05140	Peptidase M50 family protein	1	chr1	1482548	1484056	9.4991	9.35634	9.42646	9.49413	9.69308	9.52836	9.58234	9.64242	9.60006	9.4273	9.57186	9.60827	0.144556	0.132435	0.265972	0.180972	0.0328637	0.192301
AT1G05150	Calcium-binding tetratricopeptide family protein	0	chr1	1484067	1486960	8.78994	8.98129	8.99098	8.7246	8.72169	8.7534	8.72727	8.8724	8.83729	8.92074	8.73323	8.81232	-0.187506	0.100016	0.242995	-0.108415	0.250158	0.311852
AT1G05160	cytochrome P450, family 88, subfamily A, polypeptide 3	0	chr1	1487378	1490947	6.74534	6.91773	6.95807	6.87944	6.75013	6.97876	6.88353	6.6946	6.8423	6.87371	6.86944	6.80681	-0.00426987	0.965557	0.580952	-0.0669058	0.484785	0.404069
AT1G05170	Galactosyltransferase family protein	0	chr1	1491111	1494248	7.19809	7.32246	7.33428	7.23821	7.13076	7.22848	7.26476	7.25066	7.08238	7.28494	7.19915	7.19927	-0.0857925	0.200549	0.305399	-0.0856774	0.310638	0.33771
AT1G05180	NAD(P)-binding Rossmann-fold superfamily protein	0	chr1	1498114	1501824	7.83114	7.83842	7.87427	7.84965	7.85435	7.91986	7.74517	7.85609	7.78955	7.84794	7.87462	7.79693	0.0266778	0.379984	0.390133	-0.0510074	0.25063	0.312106
AT1G05190	Ribosomal protein L6 family	0	chr1	1502344	1503830	9.34093	9.18839	9.43383	9.31645	9.32749	9.18789	9.50476	9.48793	9.46736	9.32105	9.27728	9.48668	-0.0437721	0.636344	0.485841	0.165634	0.143726	0.260043
AT1G05200	glutamate receptor 3.4	1	chr1	1504960	1509152	7.31554	7.18246	7.13475	7.84904	7.579	7.69481	7.52287	7.46059	7.57369	7.21092	7.70762	7.51905	0.496704	0.00880796	0.127887	0.308136	0.0132726	0.173956
AT1G05205		0	chr1	1509103	1510281	5.92552	6.30344	6.06143	6.2418	6.07089	6.28202	6.27958	6.46476	6.5568	6.0968	6.19824	6.43371	0.101441	0.48245	0.431539	0.336919	0.075716	0.221811
AT1G05210	Transmembrane protein 97, predicted	1	chr1	1510404	1511683	9.27503	9.33588	9.29966	9.05663	9.10496	9.14179	9.1964	9.21418	8.96375	9.30352	9.10113	9.12478	-0.202398	0.00369467	0.106795	-0.178745	0.15166	0.264076
AT1G05220	Transmembrane protein 97, predicted	1	chr1	1511907	1513573	8.39705	8.36336	8.45049	8.45629	8.48577	8.56639	8.62613	8.37503	8.34751	8.40363	8.50282	8.44956	0.099183	0.0795748	0.226223	0.0459233	0.661611	0.46347
AT1G05230	homeodomain GLABROUS 2	0	chr1	1512896	1518805	5.52631	5.5847	5.52673	5.47782	5.52715	5.59839	5.55525	5.67223	5.38616	5.54591	5.53445	5.53788	-0.0114578	0.792554	0.534315	-0.008029	0.93281	0.541802
AT1G05240	Peroxidase superfamily protein	1	chr1	1521137	1522681	11.9974	11.9453	11.37	11.3355	11.4995	11.4787	11.5496	11.6832	11.7054	11.7709	11.4379	11.646	-0.333038	0.235355	0.323215	-0.124874	0.601665	0.443505
CUFF.2089		0	chr1	1523764	1523982	5.72432	5.86933	5.9704	6.07604	6.21178	5.73553	5.98174	5.85924	5.8369	5.85468	6.00778	5.89263	0.1531	0.406673	0.401282	0.0379428	0.68044	0.469937
AT1G05250	Peroxidase superfamily protein	0	chr1	1525601	1527234	12.1052	12.1861	11.5974	11.4936	11.6126	11.541	11.7067	11.814	11.8415	11.9629	11.5491	11.7874	-0.413814	0.149581	0.276216	-0.175478	0.443018	0.389019
AT1G05260	Peroxidase superfamily protein	1	chr1	1529767	1531439	13.275	13.4021	13.5284	13.433	13.1617	13.3625	13.1921	13.3096	13.2824	13.4018	13.3191	13.2614	-0.0827712	0.491553	0.435171	-0.140442	0.185907	0.282294
AT1G05270	TraB family protein	0	chr1	1531641	1534410	8.23072	8.15558	8.08289	8.17295	8.35639	8.23736	8.23781	8.40217	8.53132	8.1564	8.25557	8.39043	0.0991717	0.225383	0.3183	0.234039	0.0921402	0.231965
AT1G05280	Protein of unknown function (DUF604)	0	chr1	1535444	1537525	5.36845	5.47421	5.22182	5.41618	5.37537	5.56296	5.59617	5.68862	5.67062	5.35483	5.4515	5.65181	0.0966784	0.359285	0.381824	0.29698	0.0416972	0.199669
AT1G05290	CCT motif family protein	0	chr1	1539152	1540562	5.95873	5.86946	5.7103	5.85873	6.04582	5.90814	5.80536	5.63539	5.63903	5.84616	5.93756	5.69326	0.0914029	0.378767	0.389676	-0.152902	0.175579	0.276841
AT1G05291	Protein of unknown function (DUF1218)	0	chr1	1541348	1542432	4.51538	4.84834	4.68088	4.89366	4.78709	4.51496	4.89718	4.73109	4.55422	4.68153	4.7319	4.7275	0.0503697	0.751387	0.522117	0.0459606	0.755834	0.492838
AT1G05300	zinc transporter 5 precursor	0	chr1	1545106	1547849	10.4386	10.1446	10.3097	10.688	10.6969	10.7609	10.3922	10.4069	10.4935	10.2976	10.7153	10.4309	0.417622	0.0318793	0.177698	0.133236	0.25384	0.313803
AT1G05310	Pectin lyase-like superfamily protein	0	chr1	1550543	1552517	7.97479	8.07547	7.95595	8.20361	8.16847	8.08426	7.64014	7.82145	7.72538	8.00207	8.15211	7.72899	0.150043	0.0431193	0.191088	-0.273082	0.0163476	0.175828
AT1G05320		1	chr1	1553603	1557733	11.995	12.0429	11.8002	12.0703	12.0409	12.0462	12.0496	12.0913	12.0514	11.9461	12.0525	12.0641	0.106402	0.287264	0.349338	0.118028	0.250476	0.312056
AT1G05330		1	chr1	1558170	1558583	5.27428	5.61738	5.45279	5.36107	5.63814	5.40483	5.75471	5.5255	5.59443	5.44815	5.46801	5.62488	0.0198649	0.88711	0.561081	0.17673	0.224021	0.299702
AT1G05340		0	chr1	1558844	1559903	11.7588	11.6341	11.1205	11.7409	11.8044	11.8237	12.0712	11.9608	12.2961	11.5045	11.7896	12.1094	0.285148	0.280886	0.346701	0.604878	0.0710389	0.219104
AT1G05350	NAD(P)-binding Rossmann-fold superfamily protein	0	chr1	1560678	1564123	10.4596	10.6679	10.6383	10.3989	10.3819	10.5268	10.4765	10.4752	10.3558	10.5886	10.4359	10.4359	-0.152732	0.135377	0.268038	-0.152732	0.130499	0.25261
AT1G05360		1	chr1	1564598	1567465	9.16173	9.25614	9.31845	9.15571	9.1752	9.29556	9.31845	9.23096	9.15903	9.24544	9.20882	9.23615	-0.0366184	0.593142	0.471328	-0.00929238	0.89292	0.530868
AT1G05370	Sec14p-like phosphatidylinositol transfer family protein	0	chr1	1569192	1572280	5.54612	5.74342	6.50479	5.76405	5.73835	5.86457	6.11062	5.9434	5.92829	5.93144	5.78899	5.9941	-0.142452	0.675252	0.498615	0.0626583	0.851679	0.51968
AT1G05380	Acyl-CoA N-acyltransferase with RING/FYVE/PHD-type zinc finger protein	1	chr1	1576863	1582614	9.18354	9.28524	9.33805	9.26977	9.16336	9.20241	9.16597	9.10057	9.2008	9.26894	9.21185	9.15578	-0.0570966	0.364631	0.384182	-0.113161	0.115845	0.24376
AT1G05385	photosystem II 11 kDa protein-related	0	chr1	1582671	1583718	7.79781	7.55259	7.71051	8.0445	8.07315	7.9191	7.57871	8.3396	7.84979	7.68697	8.01225	7.9227	0.325279	0.0251276	0.16568	0.23573	0.403826	0.375349
AT1G05390	pre-tRNA	0	chr1	1583772	1583845	7.37269	7.17243	7.28964	6.84901	7.16797	6.7153	6.9767	6.6928	6.85778	7.27825	6.91076	6.84243	-0.367493	0.0953352	0.238944	-0.435825	0.0155943	0.175213
AT1G05400		1	chr1	1584073	1585421	6.98038	7.21193	7.32292	7.61277	7.60704	7.46648	7.41775	7.68276	7.58008	7.17174	7.5621	7.5602	0.390354	0.0427732	0.190932	0.388454	0.0411733	0.199433
AT1G05410	Protein of unknown function (DUF1423)	0	chr1	1585371	1587778	5.80173	6.1139	6.1658	6.04691	6.00815	5.95608	5.94746	5.84147	6.06002	6.02714	6.00371	5.94965	-0.0234275	0.857856	0.553151	-0.0774884	0.591649	0.439949
AT1G05420	ovate family protein 12	1	chr1	1590073	1590753	6.27249	6.57989	6.12137	6.44315	6.15708	6.31424	6.54467	6.41199	6.21225	6.32458	6.30483	6.38964	-0.0197584	0.90782	0.56629	0.0650521	0.716965	0.481055
AT1G05430		0	chr1	1594057	1595818	9.80995	9.72195	9.83797	9.9425	9.92428	9.89676	9.91735	9.9694	9.98041	9.78996	9.92118	9.95572	0.131221	0.0499916	0.199804	0.165762	0.0234891	0.185557
AT1G05440	C-8 sterol isomerases	0	chr1	1596007	1597848	6.18533	6.00235	6.05179	5.84609	5.81864	5.95692	6.01939	5.88243	5.99817	6.07982	5.87388	5.96666	-0.20594	0.0439893	0.192439	-0.11316	0.181924	0.279804
AT1G05450	Bifunctional inhibitor/lipid-transfer protein/seed storage 2S albumin superfamily protein	1	chr1	1599911	1601214	5.89301	6.27334	5.83115	6.28459	6.23342	6.0974	6.35963	6.48028	6.61	5.99917	6.20514	6.4833	0.20597	0.272591	0.342489	0.484135	0.0527413	0.206403
AT1G05460	P-loop containing nucleoside triphosphate hydrolases superfamily protein	0	chr1	1601148	1605027	7.45006	7.56647	7.8339	7.54177	7.40861	7.5225	7.43856	7.56647	7.23654	7.61681	7.49096	7.41386	-0.125852	0.387432	0.39388	-0.202954	0.246078	0.309769
AT1G05470	DNAse I-like superfamily protein	0	chr1	1607357	1611703	8.36052	8.42086	8.4552	8.62442	8.62412	8.58091	8.32184	8.40071	8.31701	8.4122	8.60982	8.34652	0.197623	0.00785075	0.124144	-0.0656747	0.165411	0.272039
AT_1_-_1_1614683-1614817		0	chr1	1614684	1614818	5.98359	5.66729	6.11657	5.80796	5.85511	6.01986	6.28648	5.49662	5.47625	5.92249	5.89431	5.75312	-0.0281771	0.86155	0.55416	-0.169368	0.610512	0.44663
AT1G05490	chromatin remodeling 31	0	chr1	1618602	1623452	5.51654	5.83115	5.84422	6.2521	5.94557	6.03815	5.55262	5.39734	5.73376	5.73064	6.07861	5.56124	0.347969	0.0700194	0.219124	-0.169398	0.307136	0.336334
AT1G05500	Calcium-dependent lipid-binding (CaLB domain) family protein	1	chr1	1624955	1629224	10.508	10.7265	10.7193	10.586	10.4916	10.5889	10.7932	10.8298	10.5797	10.6513	10.5555	10.7342	-0.0957822	0.316073	0.362985	0.08297	0.477423	0.401169
AT1G05510	Protein of unknown function (DUF1264)	1	chr1	1629446	1630863	4.67491	4.9141	4.92208	4.78022	4.94827	4.68324	5.01877	5.05027	4.97935	4.83703	4.80391	5.01613	-0.0331187	0.782415	0.531703	0.179098	0.151012	0.263763
AT1G05520	Sec23/Sec24 protein transport family protein	0	chr1	1630900	1635711	9.93575	10.2823	10.2644	10.0207	9.86906	10.1084	10.0719	10.0591	9.8394	10.1608	9.99939	9.99012	-0.161455	0.302295	0.35646	-0.170724	0.285563	0.327647
AT1G05530	UDP-glucosyl transferase 75B2	0	chr1	1636496	1637863	6.05221	6.44167	6.15195	5.76321	5.70501	5.86079	6.16398	6.2319	6.14734	6.21527	5.77634	6.18107	-0.438938	0.0494673	0.198876	-0.0341998	0.799714	0.504481
AT1G05540	Protein of unknown function (DUF295)	1	chr1	1639286	1640811	6.43515	6.32674	6.3609	6.36247	6.105	5.9	6.48092	5.83781	6.12967	6.37426	6.12249	6.14947	-0.251775	0.195582	0.302619	-0.224796	0.349787	0.353543
AT1G05550	Protein of unknown function (DUF295)	0	chr1	1640959	1643917	5.4536	5.59392	5.51591	5.51318	5.26655	5.07838	5.59831	5.6291	5.04644	5.52114	5.28604	5.42462	-0.235108	0.195509	0.302584	-0.0965277	0.663802	0.464154
AT1G05560	UDP-glucosyltransferase 75B1	0	chr1	1645498	1647147	6.83517	6.98589	7.26388	7.46478	7.40222	7.09167	8.00243	7.75798	7.54481	7.02831	7.31955	7.76841	0.291242	0.163331	0.285656	0.740093	0.0154426	0.17492
AT1G05562		1	chr1	1645875	1647162	6.20384	6.5309	6.97729	6.44613	6.36808	6.04945	6.74636	6.89891	6.80336	6.57068	6.28788	6.81621	-0.282792	0.346281	0.376225	0.245533	0.387996	0.369191
AT1G05570	callose synthase 1	0	chr1	1647706	1659437	8.23477	8.2422	8.33864	8.55739	8.58595	8.60952	8.36407	8.38767	8.26443	8.27187	8.58429	8.33872	0.312418	0.00452024	0.112393	0.0668552	0.256719	0.315023
AT1G05575		0	chr1	1661691	1662187	8.92447	8.57588	8.04734	9.00946	9.07954	9.27795	8.9806	8.7942	8.87631	8.5159	9.12232	8.8837	0.606418	0.130304	0.264165	0.367805	0.284034	0.326982
AT1G05577	Domain of unknown function (DUF966)	0	chr1	1662370	1664398	5.68155	5.60385	5.65177	5.42498	5.55109	5.64611	5.57767	5.84219	5.97624	5.64573	5.54073	5.7987	-0.104999	0.237657	0.324517	0.152978	0.320502	0.341499
AT1G05580	cation/H+ exchanger 23	0	chr1	1665433	1668904	4.56114	4.49612	4.69256	4.39118	5.10349	4.60031	4.96274	4.60878	4.50869	4.58327	4.69833	4.69341	0.115053	0.645898	0.488986	0.110133	0.520064	0.41724
AT1G05590	beta-hexosaminidase 2	1	chr1	1669350	1671876	8.97554	9.12608	9.18069	8.94764	8.86155	8.8923	8.83563	8.8344	8.67848	9.0941	8.9005	8.78284	-0.193607	0.0713498	0.219856	-0.311268	0.0189502	0.180443
AT1G05600	Tetratricopeptide repeat (TPR)-like superfamily protein	1	chr1	1671936	1673856	7.38851	7.6428	7.46017	7.75083	7.75298	7.94533	7.45597	7.66037	7.68427	7.49716	7.81638	7.6002	0.319219	0.0337638	0.179295	0.103041	0.381197	0.366874
AT1G05610	ADP-glucose pyrophosphorylase small subunit 2	0	chr1	1673861	1675934	6.63364	6.74147	6.75097	6.67085	6.70629	6.69433	6.50714	6.55374	6.39905	6.70869	6.69049	6.48664	-0.0182006	0.681481	0.500461	-0.222049	0.021403	0.183034
AT_1_+_1_1676708-1676806		1	chr1	1676709	1676807	5.25317	5.21134	5.46685	5.08073	5.0905	5.20042	5.35291	5.31047	5.17709	5.31045	5.12388	5.28016	-0.186572	0.127377	0.262244	-0.0302945	0.768459	0.496286
AT1G05615	Domain of unknown function (DUF313)	0	chr1	1677507	1678270	5.42	5.55286	5.44228	5.47571	5.62753	5.53899	5.32199	5.35302	5.58331	5.47171	5.54741	5.41944	0.0757005	0.2774	0.344825	-0.052269	0.610823	0.44677
AT1G05620	uridine-ribohydrolase 2	1	chr1	1679158	1681710	9.94483	9.9377	10.0039	9.94322	9.86411	9.94158	10.0287	9.92428	9.84156	9.96213	9.91631	9.9315	-0.0458223	0.246011	0.328396	-0.0306288	0.639592	0.456641
AT1G05630	Endonuclease/exonuclease/phosphatase family protein	1	chr1	1682318	1687363	9.10202	9.15571	9.06465	8.76194	8.97048	8.93807	8.91124	9.04606	8.97965	9.10746	8.89016	8.97899	-0.217296	0.0626497	0.212083	-0.128476	0.0602486	0.212934
AT1G05640	Ankyrin repeat family protein	0	chr1	1687436	1689501	7.44442	7.60833	7.8909	7.6279	7.37918	7.59608	7.53791	7.57954	7.30922	7.64788	7.53439	7.47555	-0.113495	0.50534	0.440557	-0.172329	0.338622	0.348845
AT1G05650	Pectin lyase-like superfamily protein	0	chr1	1690264	1692126	8.73258	8.61432	8.83008	8.22552	8.1922	8.3396	8.34232	8.37035	8.26167	8.72566	8.25244	8.32478	-0.473224	0.0048277	0.113335	-0.400885	0.0105795	0.169878
AT1G05660	Pectin lyase-like superfamily protein	0	chr1	1694286	1696058	9.54685	9.42069	9.77213	9.23718	9.23288	9.09636	9.45934	9.30191	8.76905	9.57989	9.18881	9.17677	-0.391082	0.04545	0.193886	-0.403123	0.184405	0.281307
AT1G05670	Pentatricopeptide repeat (PPR-like) superfamily protein	0	chr1	1697587	1701025	6.66202	6.90033	6.93614	6.73814	6.63648	6.869	6.85011	6.7109	6.76549	6.83283	6.74787	6.7755	-0.0849519	0.482489	0.431556	-0.057325	0.591234	0.439846
AT1G05675	UDP-Glycosyltransferase superfamily protein	0	chr1	1701116	1702749	4.85968	5.10944	5.12748	4.83174	4.94514	4.99848	5.5416	5.07708	5.21634	5.0322	4.92512	5.27834	-0.107075	0.356504	0.380726	0.246143	0.217417	0.296989
AT1G05680	Uridine diphosphate glycosyltransferase 74E2	0	chr1	1703092	1704691	7.23369	7.68397	7.92065	8.417	8.18223	8.40759	9.01547	8.82603	8.84364	7.61277	8.33561	8.89505	0.722837	0.0552304	0.20492	1.28228	0.0171819	0.177797
AT1G05690	BTB and TAZ domain protein 3	1	chr1	1707011	1709347	5.69453	6.03241	5.92113	5.93825	6.26148	5.95332	5.95923	5.92751	6.22472	5.88269	6.05102	6.03715	0.168328	0.309954	0.36029	0.154465	0.32268	0.342374
AT1G05700	Leucine-rich repeat transmembrane protein kinase protein	1	chr1	1709796	1713245	7.49306	7.57217	7.29155	7.3214	7.49281	7.20076	7.74	7.84377	8.01012	7.45226	7.33832	7.86463	-0.113934	0.392529	0.395899	0.412373	0.023026	0.18472
AT_1_-_1_1713626-1713757		0	chr1	1713627	1713758	5.0127	4.57429	4.94412	4.91456	5.14502	5.0028	5.08852	5.05442	5.03145	4.8437	5.02079	5.05813	0.177091	0.329808	0.36928	0.214427	0.254908	0.314111
AT1G05710	basic helix-loop-helix (bHLH) DNA-binding superfamily protein	1	chr1	1714950	1717276	10.057	10.0223	9.95184	10.4026	10.5539	10.3213	10.4927	10.4083	10.4239	10.0104	10.4259	10.4416	0.415576	0.0139135	0.143229	0.431264	0.000508141	0.0856428
AT1G05720	selenoprotein family protein	0	chr1	1717447	1718909	11.4989	11.5454	11.5655	11.5765	11.4871	11.5812	11.5852	11.5629	11.4156	11.5366	11.5483	11.5212	0.0116376	0.76795	0.527596	-0.0153826	0.806862	0.506606
AT1G05730	Eukaryotic protein of unknown function (DUF842)	1	chr1	1718555	1720303	7.49112	7.58896	7.76621	7.64725	7.407	7.6631	7.61858	7.55547	7.16321	7.61543	7.57245	7.44575	-0.0429835	0.728724	0.515137	-0.169677	0.372479	0.363
AT1G05740	Eukaryotic protein of unknown function (DUF842)	1	chr1	1720674	1721309	5.25198	5.43426	5.43615	5.09619	5.49649	5.43446	4.95389	5.06855	5.13284	5.37413	5.34238	5.05176	-0.0317539	0.833905	0.545992	-0.322372	0.0167732	0.177221
AT1G05750	Tetratricopeptide repeat (TPR)-like superfamily protein	1	chr1	1721509	1724734	4.87462	5.05336	5.07298	4.72717	4.86816	4.81797	4.86749	5.09094	4.89723	5.00032	4.80443	4.95189	-0.195888	0.0699124	0.21908	-0.048436	0.634806	0.455198
AT1G05760	Mannose-binding lectin superfamily protein	0	chr1	1723734	1724486	10.0039	9.98471	10.0583	10.2023	10.2924	10.2677	9.86935	9.73371	9.8465	10.0156	10.2542	9.81652	0.238537	0.00270087	0.10145	-0.199096	0.0241507	0.186623
AT1G05770	Mannose-binding lectin superfamily protein	0	chr1	1725388	1726283	8.46636	8.52012	8.58443	8.55387	8.64058	8.63927	8.11644	8.31248	8.27747	8.52364	8.61124	8.23546	0.087602	0.122973	0.25924	-0.288173	0.0228754	0.18472
AT1G05780	Vacuolar ATPase assembly integral membrane protein VMA21-like domain	1	chr1	1726608	1728404	8.23483	8.28214	8.24318	8.60217	8.48603	8.58422	8.37133	8.40239	8.30073	8.25338	8.55747	8.35815	0.304091	0.00682268	0.122113	0.10477	0.0545558	0.208409
AT1G05785	Got1/Sft2-like vescicle transport protein family	1	chr1	1730249	1732626	9.62583	9.58484	9.54063	9.77181	9.69115	9.70683	9.6413	9.67597	9.72435	9.58377	9.72326	9.68054	0.139494	0.0161023	0.147799	0.096772	0.0482993	0.203493
AT1G05790	lipase class 3 family protein	1	chr1	1732871	1737489	9.13485	9.17709	9.01146	9.24474	9.25493	9.28007	9.38357	9.37727	9.4661	9.1078	9.25991	9.40898	0.152114	0.0863168	0.231589	0.301179	0.0114518	0.170854
AT1G05800	alpha/beta-Hydrolases superfamily protein	1	chr1	1741204	1742619	5.3062	5.01967	5.41645	5.62865	5.05274	5.17191	5.1864	4.92665	5.18333	5.24744	5.28443	5.09879	0.0369946	0.870853	0.556534	-0.148646	0.371971	0.362802
AT1G05805	basic helix-loop-helix (bHLH) DNA-binding superfamily protein	1	chr1	1744773	1747693	10.4169	10.3063	10.3455	10.4112	10.4248	10.4228	10.3391	10.3295	10.4199	10.3562	10.4196	10.3628	0.06335	0.187603	0.298301	0.00658523	0.886413	0.529187
AT1G05810	RAB GTPase homolog A5E	1	chr1	1748314	1749460	10.6753	10.6431	10.258	10.6306	10.7488	10.6323	10.5993	10.596	10.6369	10.5255	10.6706	10.6107	0.145104	0.394141	0.396511	0.0852515	0.590458	0.439617
AT1G05820	SIGNAL PEPTIDE PEPTIDASE-LIKE 5	1	chr1	1749682	1753990	5.66251	5.63932	5.66299	5.89263	5.6946	5.62979	5.49662	5.38982	5.92801	5.65494	5.739	5.60482	0.0840635	0.399087	0.398378	-0.0501236	0.789501	0.501904
AT1G05830	trithorax-like protein 2	1	chr1	1754244	1761817	9.03597	9.13764	9.27795	9.18069	9.14483	9.14995	9.09925	9.15683	9.15683	9.15052	9.15849	9.13764	0.00797013	0.920471	0.56961	-0.0128844	0.873795	0.525623
AT1G05835	PHD finger protein	1	chr1	1762224	1762814	7.88853	7.86248	7.81895	8.24843	8.13532	8.24794	7.93123	8.02767	8.0963	7.85665	8.21056	8.0184	0.353909	0.00337242	0.10522	0.16175	0.0609294	0.213485
AT1G05840	Eukaryotic aspartyl protease family protein	0	chr1	1762734	1766281	10.663	10.5901	10.6121	10.9408	10.8595	10.8546	10.7513	10.7513	10.9572	10.6218	10.885	10.8199	0.263223	0.0022031	0.0985755	0.198187	0.0906552	0.231378
AT1G05850	Chitinase family protein	0	chr1	1766503	1768695	15.2646	15.337	15.3707	15.5952	15.4033	15.5638	15.5234	15.704	15.5361	15.3241	15.5208	15.5878	0.196669	0.0603201	0.210156	0.263695	0.0270443	0.187915
AT1G05860		1	chr1	1769014	1771115	8.72277	8.78341	8.81895	9.05286	8.87449	8.85035	8.79254	8.77119	8.79125	8.77504	8.9259	8.78499	0.150856	0.127617	0.262388	0.00994867	0.760449	0.494093
AT1G05870	Protein of unknown function (DUF1685)	0	chr1	1771457	1773293	10.4138	10.413	10.523	10.2139	10.2802	10.2154	10.2388	10.1519	10.5495	10.45	10.2365	10.3134	-0.213479	0.0123793	0.14025	-0.136564	0.376787	0.364908
AT_1_+_1_1773752-1773904		1	chr1	1773753	1773905	5.26631	5.35669	5.22597	5.28497	5.37134	5.36122	5.15337	6.39594	5.08619	5.28299	5.33918	5.54517	0.0561854	0.307349	0.358836	0.262176	0.601318	0.443429
AT1G05880	RING/U-box superfamily protein	1	chr1	1775643	1778553	5.78063	5.89003	5.08145	5.04426	5.15399	5.28033	5.15455	4.86392	5.27826	5.58403	5.15952	5.09891	-0.42451	0.231225	0.320881	-0.485126	0.186695	0.282791
AT1G05890	RING/U-box superfamily protein	1	chr1	1779256	1784529	11.5778	11.661	11.654	11.687	11.6554	11.7663	11.5967	11.5682	11.3127	11.6309	11.7029	11.4925	0.0719655	0.168031	0.288008	-0.138391	0.2615	0.317226
AT1G05894		1	chr1	1784803	1786292	5.83523	5.9363	5.64478	5.75833	6.94035	5.79098	5.74904	5.5312	5.55983	5.80543	6.16322	5.61336	0.357787	0.456238	0.421556	-0.192079	0.157523	0.267666
AT1G05900	endonuclease III 2	1	chr1	1786856	1789676	8.29733	8.25294	8.12046	8.30168	8.3581	8.35878	8.39526	8.14738	8.46856	8.22358	8.33952	8.33707	0.11594	0.150047	0.276405	0.113489	0.378743	0.365755
AT1G05910	cell division cycle protein 48-related / CDC48-related	1	chr1	1790224	1796647	9.31779	9.55606	9.68339	9.2859	9.21353	9.31019	9.33056	9.43673	9.18491	9.51908	9.26987	9.3174	-0.249207	0.137564	0.269686	-0.201683	0.204106	0.291077
AT1G05920	Domain of unknown function (DUF313)	1	chr1	1796778	1798254	4.95782	5.03982	5.04903	4.92844	4.95589	4.9817	4.87655	4.76181	5.02567	5.01556	4.95534	4.88801	-0.0602119	0.162598	0.285329	-0.127543	0.231339	0.303123
AT1G05925		0	chr1	1798901	1799062	4.79248	4.81289	4.96793	5.20962	5.00455	5.00103	4.95858	5.31625	4.82532	4.85777	5.07173	5.03338	0.213966	0.0757972	0.223256	0.175615	0.356429	0.356098
AT1G05930	Domain of unknown function (DUF313)	1	chr1	1799418	1800933	6.23992	6.14698	6.01621	6.08232	5.97843	6.08903	6.02037	5.73721	6.2909	6.13437	6.04993	6.01616	-0.0844458	0.33449	0.371358	-0.118211	0.548459	0.426245
AT1G05940	cationic amino acid transporter 9	0	chr1	1801162	1803984	10.2591	10.2632	10.239	10.4017	10.3268	10.3246	10.3158	11.5338	10.5207	10.2538	10.3511	10.7901	0.0972879	0.0518405	0.201441	0.536347	0.290319	0.329407
AT1G05950		0	chr1	1804401	1807471	6.82409	6.87435	6.9049	7.11939	6.97016	6.9695	6.91663	7.2143	6.83251	6.86778	7.01968	6.98781	0.151906	0.074585	0.222555	0.120035	0.409639	0.37739
AT1G05960	ARM repeat superfamily protein	0	chr1	1807973	1815474	7.01474	7.05897	6.95086	6.94645	7.10198	6.94182	6.80217	6.92045	7.04265	7.00819	6.99675	6.92175	-0.0114408	0.862911	0.55453	-0.0864391	0.344714	0.351901
AT1G05970	RNA-binding (RRM/RBD/RNP motifs) family protein	0	chr1	1816056	1817282	8.91141	8.65584	8.97537	8.82135	8.91158	8.93886	8.72055	8.69717	8.6804	8.84754	8.8906	8.69937	0.0430586	0.711178	0.509712	-0.148168	0.267443	0.319857
AT1G05990	EF hand calcium-binding protein family	1	chr1	1818447	1819040	7.85677	7.84965	7.42501	7.64381	7.61788	7.88059	7.59344	7.79506	7.48341	7.71047	7.71409	7.62397	0.00361845	0.983831	0.585273	-0.086504	0.640969	0.456919
AT1G06000	UDP-Glycosyltransferase superfamily protein	0	chr1	1820308	1821894	9.81483	10.0111	9.99697	9.56631	9.54892	11.1782	9.87609	9.91362	9.70016	9.94098	10.0978	9.82996	0.156822	0.799586	0.536446	-0.111022	0.290645	0.329521
AT1G06002		1	chr1	1820977	1821918	6.02409	6.41487	6.26461	6.35447	6.37408	6.33228	5.93873	6.3987	6.35078	6.23453	6.35361	6.2294	0.119083	0.405306	0.400605	-0.00512235	0.979324	0.553368
AT1G06010		1	chr1	1822618	1823997	5.87796	6.20083	6.12379	6.17568	5.94645	6.16877	6.17647	6.05786	6.26768	6.06753	6.09697	6.16733	0.0294404	0.823401	0.543257	0.099807	0.442254	0.388812
AT1G06020	pfkB-like carbohydrate kinase family protein	1	chr1	1824548	1826101	5.27396	5.57442	5.4463	5.70083	5.73892	5.7534	5.37974	5.45326	5.76006	5.43156	5.73105	5.53102	0.299494	0.0707596	0.219489	0.0994656	0.53433	0.421822
AT1G06030	pfkB-like carbohydrate kinase family protein	1	chr1	1826880	1828161	5.18224	5.00627	5.28766	4.99691	5.3744	5.05211	4.68911	4.9637	5.38662	5.15873	5.14114	5.01314	-0.0175863	0.909041	0.566663	-0.145583	0.559396	0.429931
AT1G06040	B-box zinc finger family protein	0	chr1	1828413	1829890	13.9484	13.708	13.8266	13.9047	13.8215	13.7698	13.6071	13.772	13.6737	13.8277	13.832	13.6843	0.00430185	0.960204	0.579438	-0.143388	0.173167	0.275807
AT1G06050	Protein of unknown function (DUF1336)	0	chr1	1830605	1832555	9.16926	9.09976	8.78557	9.18839	9.29667	9.19866	9.25324	9.19275	9.38648	9.0182	9.22791	9.27749	0.209707	0.211802	0.310895	0.259289	0.145961	0.261029
AT1G06060	LisH and RanBPM domains containing protein	1	chr1	1832943	1834861	10.2855	10.2555	10.3075	10.3716	10.3845	10.3755	10.2676	10.392	10.4208	10.2828	10.3772	10.3601	0.0943835	0.019476	0.155727	0.0773075	0.236937	0.305887
AT1G06070	Basic-leucine zipper (bZIP) transcription factor family protein	0	chr1	1834829	1837648	10.7122	10.7839	10.8519	10.9102	10.7761	10.8873	10.7004	10.7575	10.6462	10.7827	10.8579	10.7014	0.0752118	0.263101	0.338082	-0.0812901	0.193575	0.286749
AT1G06080	delta 9 desaturase 1	1	chr1	1843568	1846302	9.71416	9.76729	9.63005	9.68889	9.65681	9.91043	9.68081	9.60243	9.54483	9.70383	9.75204	9.60936	0.0482085	0.627014	0.482461	-0.0944762	0.167579	0.272585
AT1G06090	Fatty acid desaturase family protein	1	chr1	1847883	1849693	11.0741	10.9564	10.9041	10.9829	11.0187	11.2336	11.0151	10.8791	11.0225	10.9782	11.0784	10.9722	0.100211	0.351668	0.378566	-0.00593738	0.935167	0.542319
AT1G06100	Fatty acid desaturase family protein	1	chr1	1851530	1853019	8.96967	8.60319	8.46831	8.74659	8.8879	8.88478	8.69186	8.69426	8.80166	8.68039	8.83976	8.72926	0.159368	0.401498	0.399465	0.048874	0.778366	0.498898
AT1G06110	SKP1/ASK-interacting protein 16	0	chr1	1853077	1855031	10.3552	10.3898	10.3555	10.6216	10.661	10.6134	10.2874	10.3812	10.553	10.3669	10.632	10.4072	0.265147	0.000203723	0.0663007	0.0403388	0.656982	0.462204
AT1G06120	Fatty acid desaturase family protein	1	chr1	1855943	1857718	9.79623	9.66366	9.2421	9.60859	9.65794	9.61385	9.60834	9.67556	9.67784	9.56733	9.6268	9.65391	0.0594674	0.756389	0.523894	0.086582	0.657072	0.462216
AT1G06130	glyoxalase 2-4	0	chr1	1857767	1860730	8.3396	8.5204	8.58141	8.61118	8.62652	8.63473	8.4351	8.42493	8.6622	8.48047	8.62414	8.50741	0.143672	0.185381	0.297153	0.0269397	0.812236	0.508074
AT1G06135		1	chr1	1862197	1862742	5.35065	5.93023	4.61116	4.62028	5.04941	4.92196	4.58714	4.57602	4.78925	5.29735	4.86388	4.6508	-0.433462	0.376242	0.388754	-0.646542	0.22982	0.302461
AT1G06137		0	chr1	1863544	1863750	5.46663	5.93433	4.80556	4.65131	4.76255	4.93377	4.79464	5.14057	5.03705	5.40218	4.78254	4.99076	-0.619635	0.193553	0.301627	-0.411419	0.335875	0.347527
AT1G06140	Pentatricopeptide repeat (PPR) superfamily protein	1	chr1	1864796	1866472	6.05019	6.36564	6.17706	6.13545	6.12019	6.34347	6.4548	6.75326	6.32946	6.19763	6.1997	6.51251	0.00207571	0.986689	0.586016	0.314878	0.119509	0.245759
AT1G06150	basic helix-loop-helix (bHLH) DNA-binding superfamily protein	0	chr1	1867015	1873718	8.09609	8.09246	8.27282	8.21654	8.11348	8.16476	7.9833	8.20864	8.08773	8.15379	8.16493	8.09322	0.0111393	0.877909	0.55852	-0.0605661	0.530374	0.42047
AT1G06149	conserved peptide upstream open reading frame 8	0	chr1	1868989	1873718	9.06813	9.10178	9.21166	9.03466	8.92523	9.02914	8.87556	8.96578	9.05964	9.12719	8.99634	8.96699	-0.130843	0.0824582	0.229161	-0.160194	0.0823627	0.226481
AT1G06148		0	chr1	1874885	1877528	5.63856	5.2384	5.14173	5.37051	5.00694	4.99933	5.24736	5.43406	5.10812	5.33956	5.12559	5.26318	-0.213973	0.337299	0.372636	-0.0763818	0.695613	0.474533
AT_1_+_0_1881181-1881417		1	chr1	1881182	1881418	5.6283	5.89455	5.62035	5.80362	5.55866	5.72473	5.64953	5.80498	5.31727	5.7144	5.69567	5.59059	-0.0187291	0.879352	0.559014	-0.123806	0.513294	0.414557
AT1G06160	octadecanoid-responsive Arabidopsis AP2/ERF 59	1	chr1	1883004	1883934	7.52043	7.78971	7.71133	8.18848	8.36447	7.96647	8.04919	8.05156	8.13954	7.67382	8.17314	8.08009	0.499314	0.0285099	0.170928	0.406271	0.0253207	0.187915
AT1G06170	basic helix-loop-helix (bHLH) DNA-binding superfamily protein	0	chr1	1884981	1886897	6.3426	6.47056	6.38205	6.48272	6.11545	6.3527	6.73512	6.61201	6.58038	6.3984	6.31695	6.64251	-0.0814485	0.535999	0.451559	0.244103	0.0171722	0.177797
AT1G06180	myb domain protein 13	1	chr1	1889408	1891158	8.56145	8.63288	8.83514	8.39057	8.28956	8.37527	8.55274	8.55709	8.41352	8.67649	8.3518	8.50779	-0.324688	0.0441944	0.192467	-0.168705	0.166799	0.272392
AT1G06190	Rho termination factor	0	chr1	1892273	1894148	8.47679	8.28184	8.48092	8.17517	8.24814	8.26124	8.28731	8.2784	8.25932	8.41318	8.22818	8.27501	-0.184999	0.0907926	0.234861	-0.138171	0.168221	0.273028
AT1G06200	Peptidase S24/S26A/S26B/S26C family protein	0	chr1	1894336	1896935	9.99293	9.92261	10.0357	10.1965	10.2096	10.1689	9.90805	9.96438	9.98177	9.98374	10.1917	9.9514	0.207931	0.0153717	0.146691	-0.0323332	0.467703	0.397558
AT1G06210	ENTH/VHS/GAT family protein	1	chr1	1897203	1899208	9.1748	9.25678	9.24893	9.07701	9.08448	9.10995	9.09335	9.17016	9.25039	9.22684	9.09048	9.1713	-0.136354	0.0233649	0.162062	-0.0555354	0.362032	0.358719
AT1G06220	Ribosomal protein S5/Elongation factor G/III/V family protein	1	chr1	1899964	1904873	9.72706	10.0114	10.067	9.8433	9.81371	9.78601	9.83091	9.90405	9.70683	9.93514	9.81434	9.81393	-0.120803	0.369808	0.386004	-0.121216	0.384637	0.368215
AT1G06225	CLAVATA3/ESR-RELATED 3	1	chr1	1905975	1906226	5.48438	5.66391	5.76831	5.59662	5.8582	6.0063	6.05506	6.68861	5.89994	5.63887	5.82037	6.21454	0.181506	0.288471	0.349634	0.575666	0.128296	0.251227
AT1G06230	global transcription factor group E4	1	chr1	1906963	1910848	11.5717	11.6987	11.6902	11.6238	11.5165	11.6258	11.5399	11.6074	11.4728	11.6535	11.5887	11.54	-0.0648702	0.30173	0.356323	-0.113523	0.115056	0.243242
AT1G06240	Protein of unknown function DUF455	1	chr1	1911122	1913205	8.33189	8.4536	8.55096	8.34565	8.24903	8.45656	8.19277	8.31842	8.19703	8.44548	8.35041	8.23607	-0.0950702	0.337233	0.37263	-0.20941	0.0596899	0.212414
AT1G06250	alpha/beta-Hydrolases superfamily protein	0	chr1	1913256	1914895	6.36469	6.38063	6.35066	6.29578	6.16005	6.00659	6.27844	5.6537	5.9022	6.36533	6.15414	5.94478	-0.211185	0.125774	0.261188	-0.420547	0.146248	0.261241
AT1G06265	other RNA	0	chr1	1914943	1917661	7.30899	7.52717	7.58495	7.48281	7.35808	7.53267	7.38479	7.35499	7.21622	7.4737	7.45786	7.31867	-0.0158453	0.881792	0.559562	-0.155033	0.205527	0.291733
AT1G06260	Cysteine proteinases superfamily protein	1	chr1	1916430	1917585	5.89853	6.16046	5.79045	5.86933	5.75434	5.8699	5.97153	6.02192	5.76874	5.94981	5.83119	5.92073	-0.118622	0.396945	0.397716	-0.0290821	0.840369	0.515982
AT1G06270	Pentatricopeptide repeat (PPR) superfamily protein	0	chr1	1918088	1919760	7.84092	7.89901	8.18082	7.84431	7.77777	7.84032	7.78873	7.68124	7.74546	7.97358	7.8208	7.73848	-0.152779	0.2809	0.346701	-0.235103	0.1456	0.26097
AT1G06280	LOB domain-containing protein 2	0	chr1	1920307	1920949	7.3265	7.15996	7.4312	6.93539	6.81967	7.0649	6.84634	6.73403	6.90844	7.30589	6.93999	6.82961	-0.365901	0.0265642	0.167975	-0.476281	0.0107223	0.170524
AT1G06290	acyl-CoA oxidase 3	1	chr1	1922352	1926278	10.4022	10.4342	10.3471	10.3395	10.3535	10.3871	10.477	10.4596	10.6398	10.3945	10.36	10.5255	-0.0344454	0.318606	0.364131	0.130984	0.136214	0.2556
AT1G06310	acyl-CoA oxidase 6	1	chr1	1926791	1930258	6.01314	6.33465	6.36998	6.29075	6.18386	6.15241	5.97527	6.41452	6.1249	6.23926	6.20901	6.17156	-0.0302482	0.821442	0.542733	-0.0676961	0.713929	0.480164
AT1G06320		1	chr1	1930523	1931449	7.32356	7.56893	7.63557	7.30555	7.09808	7.35563	7.38757	7.21088	7.02846	7.50935	7.25308	7.20897	-0.256267	0.108645	0.249228	-0.300382	0.0999002	0.23567
AT1G06330	Heavy metal transport/detoxification superfamily protein	0	chr1	1931671	1932266	8.01334	7.98264	8.03757	7.62346	7.79391	7.8337	7.72192	7.76361	7.43605	8.01118	7.75036	7.64053	-0.260824	0.0489587	0.198383	-0.370657	0.0660154	0.216899
AT1G06340	Plant Tudor-like protein	0	chr1	1933284	1934014	4.51826	4.77384	4.8735	5.34996	4.68604	5.0006	4.4044	4.81167	4.88754	4.72187	5.0122	4.7012	0.290335	0.273771	0.342926	-0.0206671	0.916356	0.537242
AT1G06350	Fatty acid desaturase family protein	0	chr1	1935293	1936819	7.64149	7.66899	7.89856	7.56576	7.5556	7.80419	7.60975	7.70356	7.63672	7.73635	7.64185	7.65001	-0.0944997	0.457598	0.421918	-0.0863394	0.404286	0.375521
AT1G06360	Fatty acid desaturase family protein	0	chr1	1938963	1940459	5.89997	5.60248	5.63598	5.56627	5.63352	5.4357	5.32016	5.15307	5.55762	5.71281	5.54516	5.34362	-0.167647	0.217812	0.314443	-0.369194	0.073107	0.219875
AT1G06370		0	chr1	1942843	1944934	6.08498	6.24602	6.08302	6.45067	6.18199	6.1869	6.14264	6.04906	5.98394	6.13801	6.27318	6.05855	0.135178	0.276562	0.344469	-0.0794573	0.327095	0.343803
AT1G06380	Ribosomal protein L1p/L10e family	1	chr1	1945124	1946076	7.40175	7.53502	7.4761	7.66104	7.39037	7.45348	7.35078	7.46142	7.63526	7.47095	7.50163	7.48249	0.0306765	0.757813	0.524309	0.011535	0.907937	0.535065
AT1G06390	GSK3/SHAGGY-like protein kinase 1	1	chr1	1946788	1950860	7.75056	7.80478	7.80098	7.78595	7.79241	7.75298	7.85088	7.91478	7.70277	7.78544	7.77711	7.82281	-0.00832903	0.71812	0.511898	0.0373729	0.617349	0.448713
AT1G06400	Ras-related small GTP-binding family protein	0	chr1	1950844	1952785	9.93202	9.82186	9.9884	10.2653	10.1689	10.1347	10.2297	10.1739	10.2884	9.91409	10.1896	10.2307	0.275515	0.0129853	0.141219	0.316562	0.00837387	0.161777
AT1G06410	trehalose-phosphatase/synthase 7	1	chr1	1954850	1958756	9.05413	9.25722	9.1171	9.05851	9.03763	9.01633	9.11444	9.24416	9.35463	9.14282	9.03749	9.23774	-0.105326	0.218024	0.314554	0.0949262	0.360488	0.357991
AT1G06420		1	chr1	1958923	1959947	6.82211	6.98486	7.15218	6.6689	6.51422	6.50063	6.51561	6.59543	6.56529	6.98638	6.56125	6.55878	-0.425136	0.0275141	0.169363	-0.427606	0.0397077	0.198206
AT1G06430	FTSH protease 8	0	chr1	1960058	1963011	8.24366	8.39587	8.32105	8.4111	8.48159	8.49462	8.65153	8.64133	8.783	8.32019	8.46243	8.69195	0.14224	0.0627281	0.212083	0.37176	0.00422619	0.139677
AT1G06440	Ubiquitin carboxyl-terminal hydrolase family protein	0	chr1	1963380	1965051	6.14305	6.19123	6.15407	6.04627	5.97966	6.15962	5.86073	6.22097	6.1859	6.16278	6.06185	6.0892	-0.100934	0.188199	0.298683	-0.073584	0.587783	0.43876
AT1G06450	Polynucleotidyl transferase, ribonuclease H-like superfamily protein	1	chr1	1965840	1967219	7.59547	7.65581	7.61098	7.64161	7.8987	7.84358	7.9675	7.99504	7.96573	7.62076	7.79463	7.97609	0.173872	0.150086	0.276405	0.355333	0.00039572	0.0844576
AT1G06460	alpha-crystallin domain 32.1	0	chr1	1967087	1969561	6.75233	6.85105	7.01719	7.12227	7.27225	7.15174	7.21896	7.18761	7.49138	6.87352	7.18208	7.29932	0.308561	0.0365566	0.183041	0.425795	0.0281732	0.188784
AT1G06470	Nucleotide/sugar transporter family protein	1	chr1	1969729	1973767	7.7359	7.87671	7.81634	7.76336	7.83461	7.86565	7.88763	7.79553	7.86359	7.80965	7.8212	7.84892	0.0115549	0.832094	0.545418	0.0392656	0.475568	0.400495
AT1G06475		0	chr1	1973834	1974386	9.40932	9.48536	9.22044	9.48636	9.50625	9.54721	9.44473	9.36321	9.1181	9.37171	9.51327	9.30868	0.141567	0.209852	0.310363	-0.0630261	0.643964	0.457868
AT1G06490	glucan synthase-like 7	1	chr1	1978762	1989409	7.55842	7.8097	7.83655	7.81197	7.49588	7.60371	7.24517	7.25517	7.25139	7.73489	7.63718	7.25058	-0.0977052	0.488729	0.43379	-0.484313	0.0317389	0.191915
AT1G06500		1	chr1	1989479	1990730	8.05461	8.21924	8.16814	8.29806	8.14059	8.30009	8.02283	8.12632	8.34926	8.14733	8.24625	8.16614	0.0989152	0.240932	0.326114	0.0188075	0.872872	0.525357
AT1G06515	Protein of unknown function (DUF3317)	0	chr1	1990634	1992228	8.8635	8.92082	8.93051	8.76062	8.89441	8.88918	8.77952	8.89094	8.93919	8.90494	8.84807	8.86988	-0.0568707	0.32899	0.368821	-0.0350566	0.550275	0.426901
AT1G06510		1	chr1	1992333	1993840	7.58917	7.54494	7.41364	7.87233	7.8903	7.65256	7.48514	7.57154	7.77215	7.51591	7.80506	7.60961	0.289151	0.0419692	0.189892	0.0936979	0.411557	0.377936
AT1G06520	glycerol-3-phosphate acyltransferase 1	0	chr1	1993978	1996112	6.63077	6.72021	7.18991	7.29992	7.23785	6.99112	7.81334	7.70895	7.35636	6.84697	7.1763	7.62622	0.329333	0.191227	0.300317	0.779253	0.026612	0.187915
CUFF.2771		0	chr1	1998126	1998613	5.72088	5.56665	5.57984	5.56689	5.80351	5.1698	5.66538	5.40268	4.80058	5.62246	5.5134	5.28954	-0.109055	0.619856	0.480314	-0.332914	0.322189	0.342168
AT1G06530	Tropomyosin-related	1	chr1	2001594	2002596	11.5981	11.5717	11.6338	11.7075	11.635	11.6167	11.5346	11.6526	11.6425	11.6012	11.6531	11.6099	0.0518792	0.203156	0.306779	0.00871222	0.848979	0.518682
AT1G06540		0	chr1	2002877	2003393	5.83113	6.03324	5.99982	6.00062	6.27558	6.06098	6.38496	6.20083	6.16309	5.95473	6.11239	6.24963	0.157659	0.210527	0.310593	0.294898	0.0339868	0.193171
AT1G06550	ATP-dependent caseinolytic (Clp) protease/crotonase family protein	0	chr1	2003627	2007190	10.7672	10.8638	10.7808	10.7889	10.7808	10.7015	10.9104	10.9912	11.0157	10.8039	10.7571	10.9724	-0.0468694	0.317911	0.363852	0.168498	0.0184963	0.180256
AT1G06560	NOL1/NOP2/sun family protein	1	chr1	2007615	2012006	9.58272	9.74557	9.93604	9.66519	9.71477	9.7086	9.74689	9.74954	9.32066	9.75478	9.69618	9.6057	-0.0585948	0.625434	0.481953	-0.149083	0.447636	0.390916
AT1G06570	phytoene desaturation 1	0	chr1	2011885	2013545	10.3748	10.2289	10.1863	10.383	10.3175	10.3286	10.4728	10.3803	10.3689	10.2633	10.343	10.4073	0.0797266	0.29588	0.352988	0.144006	0.111168	0.241984
AT1G06580	Pentatricopeptide repeat (PPR) superfamily protein	0	chr1	2014003	2016054	5.74843	5.78755	5.83175	6.06293	6.50831	5.50876	5.85556	5.5289	5.88384	5.78924	6.02667	5.7561	0.237426	0.498115	0.437805	-0.0331433	0.800671	0.504811
AT1G06590		0	chr1	2016308	2024662	7.4454	7.61606	7.58233	7.55676	7.61458	7.49185	7.62043	7.76689	7.55859	7.54793	7.5544	7.64864	0.00646851	0.923896	0.570456	0.100708	0.282656	0.326535
AT1G06620	2-oxoglutarate (2OG) and Fe(II)-dependent oxygenase superfamily protein	1	chr1	2025601	2027271	9.31033	9.43935	9.31136	9.4169	9.45712	9.42773	9.31019	9.21799	9.20619	9.35368	9.43392	9.24479	0.0802373	0.19571	0.30271	-0.108891	0.118641	0.245268
AT1G06630	F-box/RNI-like superfamily protein	1	chr1	2027739	2031388	9.59165	9.70221	9.80788	9.81213	9.87958	9.80515	9.73885	9.72647	9.39004	9.70058	9.83229	9.61845	0.131705	0.158474	0.282408	-0.0821299	0.571675	0.433813
AT1G06640	2-oxoglutarate (2OG) and Fe(II)-dependent oxygenase superfamily protein	1	chr1	2032338	2034018	14.2078	14.1302	14.1397	14.4083	14.4674	14.4674	14.1302	14.1772	14.2768	14.1592	14.4477	14.1947	0.288425	0.000957906	0.0859567	0.0354619	0.524261	0.418744
AT1G06645	2-oxoglutarate (2OG) and Fe(II)-dependent oxygenase superfamily protein	1	chr1	2034156	2035626	5.40997	5.33483	5.41389	5.75581	6.34983	5.37982	5.45623	5.26771	5.3728	5.38623	5.82849	5.36558	0.442257	0.257186	0.334457	-0.0206493	0.755736	0.49283
AT1G06650	2-oxoglutarate (2OG) and Fe(II)-dependent oxygenase superfamily protein	1	chr1	2035839	2037366	9.16941	9.01068	8.94829	9.3363	9.39368	9.41956	9.29291	9.42188	9.66147	9.04279	9.38318	9.45875	0.340387	0.024211	0.163831	0.415962	0.0400263	0.198433
AT1G06660		0	chr1	2037311	2040246	7.59885	7.93978	7.77947	7.75669	7.62699	7.81152	7.65289	7.76897	7.53164	7.7727	7.73174	7.65116	-0.0409641	0.739339	0.518511	-0.121537	0.3747	0.363931
AT1G06670	nuclear DEIH-boxhelicase	1	chr1	2040433	2047612	8.7008	8.96492	9.15683	8.68951	8.68064	8.85382	8.79786	8.81922	8.674	8.94085	8.74132	8.76369	-0.199527	0.268324	0.34044	-0.177158	0.311469	0.338084
AT1G06680	photosystem II subunit P-1	1	chr1	2047825	2049418	11.7936	11.7514	12.3462	11.9469	11.8888	11.9006	12.378	12.3603	12.2885	11.9638	11.9121	12.3423	-0.0516572	0.813137	0.540363	0.378496	0.184692	0.281451
AT1G06690	NAD(P)-linked oxidoreductase superfamily protein	0	chr1	2049602	2052154	8.64461	8.70928	8.80975	8.65942	8.66459	8.65441	8.99806	9.13337	9.02559	8.72121	8.65947	9.05234	-0.061737	0.327377	0.368088	0.331129	0.00680039	0.155297
AT1G06700	Protein kinase superfamily protein	0	chr1	2052481	2055548	11.593	11.5422	11.5405	11.7403	11.7769	11.8134	11.5625	11.5074	11.5852	11.5586	11.7769	11.5517	0.218259	0.00155167	0.0903238	-0.00690244	0.82338	0.511336
AT1G06710	Tetratricopeptide repeat (TPR)-like superfamily protein	0	chr1	2056575	2060242	5.77273	6.01773	5.98141	5.99948	5.90843	5.93818	6.1651	5.91496	5.76544	5.92395	5.9487	5.9485	0.0247446	0.783492	0.532053	0.0245461	0.870028	0.524717
AT1G06720	P-loop containing nucleoside triphosphate hydrolases superfamily protein	0	chr1	2060444	2067323	8.55757	8.80382	9.0819	8.62255	8.54789	8.6517	8.74272	8.99949	8.66232	8.81443	8.60738	8.80151	-0.207053	0.303615	0.357228	-0.0129237	0.94738	0.545636
AT1G06730	pfkB-like carbohydrate kinase family protein	1	chr1	2067529	2070446	6.18167	6.55488	6.62041	6.43944	6.58174	6.53363	6.28095	6.46621	6.42317	6.45232	6.51827	6.39011	0.0659508	0.683355	0.501026	-0.0622072	0.705316	0.477679
AT1G06740	transposable element gene	1	chr1	2070737	2073535	7.99772	8.09832	8.13743	8.05754	8.09708	8.16687	7.89792	8.16322	8.22779	8.07782	8.10716	8.09631	0.0293424	0.607704	0.476588	0.0184879	0.877565	0.526638
AT1G06750	P-loop containing nucleoside triphosphate hydrolases superfamily protein	1	chr1	2072979	2076505	4.91364	4.77888	5.16678	5.3833	5.54157	5.02133	4.81367	5.10185	5.02882	4.9531	5.3154	4.98145	0.362303	0.137462	0.269617	0.0283502	0.853028	0.519826
AT1G06760	winged-helix DNA-binding transcription factor family protein	0	chr1	2076504	2077698	12.693	12.7177	12.7448	12.65	12.591	12.6535	12.5163	12.6226	12.5601	12.7185	12.6315	12.5663	-0.0870132	0.0296645	0.173239	-0.15217	0.0229443	0.18472
AT1G06770	DREB2A-interacting protein 1	0	chr1	2078911	2081939	6.89391	6.87142	6.70483	6.77829	6.79232	6.90748	6.70837	6.64614	6.54948	6.82338	6.82603	6.63466	0.00264106	0.972835	0.582708	-0.188721	0.0705539	0.218705
AT1G06780	galacturonosyltransferase 6	1	chr1	2083311	2087131	8.63145	8.5795	8.48901	8.33274	8.38686	8.39828	8.5465	8.54811	8.58197	8.56666	8.37263	8.55886	-0.19403	0.0265377	0.167905	-0.00780046	0.871337	0.525212
AT1G06790	RNA polymerase Rpb7 N-terminal domain-containing protein	1	chr1	2087232	2089786	7.20125	7.69776	7.51217	7.61807	7.63567	7.54426	7.38757	7.56976	7.58502	7.47039	7.59933	7.51412	0.12894	0.468709	0.42598	0.0437277	0.801662	0.505005
AT1G06800	alpha/beta-Hydrolases superfamily protein	0	chr1	2089417	2091686	6.88777	6.9878	6.48885	6.84561	6.81359	6.77653	6.85764	6.90301	6.70435	6.78814	6.81191	6.82167	0.0237706	0.890875	0.562207	0.0335281	0.852751	0.519793
AT1G06810		0	chr1	2091738	2092528	5.16669	5.18138	5.03658	5.12917	4.84279	5.06363	4.74742	5.47035	5.45032	5.12822	5.01187	5.22269	-0.11635	0.319795	0.364648	0.0944788	0.731682	0.485468
AT1G06820	carotenoid isomerase	0	chr1	2092946	2096232	9.70315	9.90534	10.0076	9.98884	9.91422	9.98041	9.98509	9.98471	9.89581	9.87202	9.96115	9.9552	0.0891387	0.426099	0.409221	0.0831855	0.455792	0.393572
AT1G06830	Glutaredoxin family protein	1	chr1	2097151	2097655	7.44168	7.45532	7.28611	7.9682	7.99584	7.63185	6.84086	6.83613	7.13965	7.39437	7.8653	6.93888	0.470927	0.0392097	0.186145	-0.455487	0.0268724	0.187915
AT1G06840	Leucine-rich repeat protein kinase family protein	0	chr1	2097747	2103479	10.3141	10.3668	10.0794	10.1811	10.0877	10.0556	10.1461	10.2627	10.1323	10.2534	10.1081	10.1804	-0.145266	0.237051	0.324174	-0.073027	0.511175	0.413655
AT1G06850	basic leucine-zipper 52	1	chr1	2105048	2106749	9.64651	9.8047	9.75789	9.51132	9.55675	9.68227	9.69725	9.64025	9.51392	9.73637	9.58345	9.61714	-0.152919	0.092758	0.237129	-0.119226	0.172948	0.275628
AT1G06870	Peptidase S24/S26A/S26B/S26C family protein	1	chr1	2108593	2110986	9.14928	9.27117	9.17904	9.10132	9.52819	9.14532	9.2996	9.1754	9.25083	9.19983	9.25828	9.24194	0.0584463	0.713066	0.51026	0.0421109	0.45939	0.39478
AT1G06890	nodulin MtN21 /EamA-like transporter family protein	0	chr1	2111363	2114601	10.2064	10.223	10.3504	10.2599	10.2881	10.2935	10.2034	10.2378	10.1151	10.2599	10.2805	10.1855	0.0205977	0.698355	0.50565	-0.074477	0.273751	0.322501
AT1G06900	Insulinase (Peptidase family M16) family protein	0	chr1	2114927	2120745	9.16336	9.46268	9.61521	9.27724	9.24359	9.43045	9.31582	9.3513	9.05647	9.41375	9.3171	9.2412	-0.0966569	0.556161	0.458744	-0.172556	0.353323	0.354842
AT1G06910	TRF-like 7	1	chr1	2120991	2123748	8.52241	8.56046	8.61582	8.52365	8.58058	8.71043	8.44228	8.49248	8.55323	8.56623	8.60489	8.496	0.0386564	0.57589	0.465751	-0.0702323	0.171802	0.27482
AT_1_-_1_2124071-2124214		0	chr1	2124072	2124215	7.73874	7.25244	7.77899	7.25208	7.4066	7.58502	7.51747	7.20201	7.06703	7.59006	7.41457	7.26217	-0.175491	0.430447	0.411133	-0.327886	0.206566	0.292301
AT1G06920	ovate family protein 4	0	chr1	2124854	2125801	5.73847	5.6062	5.55933	5.60779	5.50609	5.59545	5.43473	5.58947	5.64262	5.63467	5.56978	5.55561	-0.0648888	0.369682	0.38591	-0.0790597	0.39201	0.370474
AT1G06923		1	chr1	2126749	2128060	6.53265	6.2318	6.49214	6.1547	6.32601	6.15032	6.24749	6.19264	6.23925	6.41886	6.21035	6.22646	-0.208517	0.146949	0.274902	-0.192403	0.174452	0.276592
AT1G06925		0	chr1	2127704	2128611	5.70169	5.53477	5.59701	5.39475	5.7448	5.74227	5.64127	5.31151	5.66497	5.61116	5.62728	5.53925	0.0161188	0.907226	0.566133	-0.071909	0.606806	0.445237
AT1G06930		1	chr1	2128843	2129883	9.07985	9.1658	9.12352	8.66604	8.57991	8.90304	8.68493	8.70841	8.4351	9.12306	8.71633	8.60948	-0.406725	0.0446418	0.193007	-0.513578	0.0211696	0.182821
AT1G06950	translocon at the inner envelope membrane of chloroplasts 110	0	chr1	2130142	2135665	9.62874	9.88808	9.90258	9.6953	9.73538	9.682	9.7358	9.85805	9.81969	9.80647	9.70423	9.80451	-0.102242	0.369262	0.385823	-0.00195505	0.985191	0.554686
AT1G06960	RNA-binding (RRM/RBD/RNP motifs) family protein	1	chr1	2135851	2137732	10.5783	10.7017	10.7973	10.6688	10.6931	10.6679	10.7225	10.8234	10.5472	10.6925	10.6766	10.6977	-0.0158289	0.826873	0.544164	0.00525117	0.961769	0.548778
AT1G06970	cation/hydrogen exchanger 14	1	chr1	2138109	2140818	5.0586	4.89947	4.9161	5.17725	5.11483	4.91265	4.67692	4.81393	4.84634	4.95806	5.06824	4.77906	0.110182	0.319222	0.364456	-0.178997	0.0688943	0.218332
AT1G06980		0	chr1	2143031	2143821	7.0999	7.26676	7.01267	7.00204	7.14995	7.08003	6.74218	6.82009	6.74329	7.12644	7.07734	6.76852	-0.0491043	0.605477	0.476028	-0.357919	0.0300057	0.189849
AT1G06990	GDSL-like Lipase/Acylhydrolase superfamily protein	1	chr1	2148387	2150152	5.37621	5.26922	5.42961	5.05896	4.85291	4.60331	4.83631	4.49314	5.12471	5.35835	4.83839	4.81805	-0.519951	0.0458053	0.194264	-0.540291	0.0894463	0.230483
AT1G07000	exocyst subunit exo70 family protein B2	0	chr1	2150194	2152325	9.63484	9.63023	9.19735	9.55094	9.61899	9.76201	9.56677	9.75255	9.67029	9.48747	9.64398	9.66321	0.156502	0.401487	0.399465	0.175731	0.351773	0.354304
AT1G07010	Calcineurin-like metallo-phosphoesterase superfamily protein	1	chr1	2152852	2155269	6.2161	6.22031	6.36907	6.5086	5.99156	6.11805	6.48885	6.79419	6.80373	6.26849	6.20607	6.69559	-0.0624231	0.733731	0.516682	0.427098	0.036023	0.194774
AT1G07020		0	chr1	2155213	2156008	11.6402	11.6484	11.6596	11.7177	11.7089	11.7229	11.6069	11.6061	11.6655	11.6494	11.7165	11.6262	0.0670833	0.00100269	0.0859567	-0.0232459	0.359311	0.357511
AT_1_+_1_2157050-2157205		1	chr1	2157051	2157206	5.02152	4.81127	4.95286	5.31508	5.22061	5.61442	4.97271	4.92973	5.02759	4.92855	5.38337	4.97668	0.45482	0.042267	0.190178	0.0481279	0.533795	0.42168
AT1G07025	Mitochondrial substrate carrier family protein	0	chr1	2157658	2158158	4.84682	4.81659	4.35252	4.75752	5.31577	4.77927	4.69654	4.74127	4.90621	4.67198	4.95085	4.78134	0.278874	0.315654	0.362771	0.10936	0.576464	0.43542
AT1G07030	Mitochondrial substrate carrier family protein	0	chr1	2158420	2160809	10.5035	10.5837	10.5542	10.5422	10.5406	10.5788	10.5288	10.5933	10.6436	10.5471	10.5539	10.5886	0.00673125	0.815915	0.541136	0.0414131	0.371893	0.362802
AT1G07040		0	chr1	2160938	2163308	7.88666	8.03954	8.05511	8.31623	8.37586	8.25109	8.42064	8.16087	8.41047	7.99377	8.31439	8.33066	0.320627	0.0108852	0.13656	0.336894	0.0368204	0.195656
AT1G07050	CCT motif family protein	0	chr1	2164188	2165239	5.50456	5.22692	5.45184	5.63306	5.79414	5.43522	5.28362	6.0098	5.42695	5.39444	5.62081	5.57346	0.22637	0.169739	0.288787	0.179019	0.514401	0.414979
AT1G07051	MIR847a; miRNA	1	chr1	2165517	2165746	5.04192	4.70011	4.94019	4.6745	4.25773	4.69214	5.29345	4.77517	4.67833	4.89407	4.54146	4.91565	-0.352614	0.120663	0.257348	0.02158	0.926696	0.540159
AT_1_+_1_2166581-2166739		1	chr1	2166582	2166740	5.2219	5.22148	5.42776	5.34148	4.89367	5.27539	5.29489	5.14428	5.17288	5.29038	5.17018	5.20402	-0.120198	0.49748	0.437569	-0.0863637	0.363381	0.359397
AT1G07060		0	chr1	2167107	2168397	5.12616	5.29446	5.16334	5.24023	5.33178	5.21647	4.9545	4.97716	5.29835	5.19465	5.26283	5.07667	0.0681711	0.340302	0.373703	-0.117984	0.40988	0.377414
AT1G07070	Ribosomal protein L35Ae family protein	1	chr1	2168564	2169851	11.4506	11.5551	11.6443	11.2539	11.3155	11.3416	11.482	11.5134	11.2064	11.55	11.3037	11.4006	-0.246286	0.0315231	0.176877	-0.149363	0.27115	0.321455
AT1G07080	Thioredoxin superfamily protein	1	chr1	2169982	2172194	8.11459	8.05167	8.29895	8.41913	8.31785	8.37099	8.20382	8.14471	8.33214	8.15507	8.36932	8.22689	0.214249	0.0868284	0.23195	0.0718172	0.484384	0.403948
AT1G07090	Protein of unknown function (DUF640)	0	chr1	2173952	2174894	7.37413	7.30627	7.3764	7.46738	7.57481	7.45853	7.66441	7.50873	7.64784	7.35227	7.50024	7.60699	0.147972	0.0371279	0.183554	0.254729	0.0209984	0.182364
AT1G07110	fructose-2,6-bisphosphatase	0	chr1	2178104	2184148	9.67328	9.74875	9.84566	9.80326	9.76037	9.77831	9.87978	10.0836	10.0709	9.7559	9.78065	10.0114	0.0247501	0.6731	0.497958	0.255538	0.0402133	0.198946
AT1G07119	other RNA	1	chr1	2184347	2186539	6.63717	6.46617	6.73383	6.55913	6.66184	6.82179	6.71597	6.63495	6.6426	6.61239	6.68092	6.66451	0.0685318	0.564957	0.461647	0.0521169	0.581494	0.436715
AT1G07120		0	chr1	2184759	2186580	5.91088	6.15507	5.98023	6.43856	6.32121	6.22908	6.04183	5.97446	5.91609	6.0154	6.32961	5.97746	0.314219	0.0307778	0.175697	-0.0379348	0.672901	0.467255
AT1G07128		0	chr1	2187621	2188417	8.79714	8.75971	8.57609	8.75988	8.80499	8.80937	8.68951	8.6735	8.93772	8.71098	8.79141	8.76691	0.0804366	0.360095	0.382108	0.0559355	0.637485	0.455988
AT1G07130	Nucleic acid-binding, OB-fold-like protein	1	chr1	2187776	2188733	8.51065	8.40239	8.1595	8.61292	8.76469	8.55527	8.34215	8.48324	8.41796	8.35751	8.64429	8.41445	0.286777	0.0913617	0.235552	0.0569362	0.649822	0.459957
AT_1_-_2_2189335-2189472		0	chr1	2189336	2189473	5.02197	4.98209	4.89788	4.66359	5.40284	5.17191	4.90922	5.46503	4.82904	4.96731	5.07945	5.06776	0.112135	0.66046	0.493607	0.100451	0.667439	0.465298
AT1G07135	glycine-rich protein	0	chr1	2189928	2190659	8.05774	8.14493	7.53733	8.55806	8.12409	8.60584	8.63658	8.29819	8.48373	7.91334	8.42933	8.47284	0.515992	0.104843	0.246703	0.559498	0.0790664	0.223886
AT1G07140	Pleckstrin homology (PH) domain superfamily protein	0	chr1	2191723	2193793	7.29518	7.55524	7.60498	7.93014	7.84297	7.92823	7.75765	7.74102	7.838	7.48514	7.90045	7.77889	0.415309	0.0402224	0.187477	0.293752	0.0812211	0.225428
AT1G07150	mitogen-activated protein kinase kinase kinase 13	0	chr1	2193941	2195798	4.70023	5.75237	5.00965	4.77424	4.51622	4.90761	4.96521	4.50632	4.88273	5.15408	4.73269	4.78475	-0.421395	0.309246	0.359896	-0.369329	0.365485	0.360119
AT1G07160	Protein phosphatase 2C family protein	0	chr1	2197908	2199748	5.24716	5.32158	5.59428	5.5063	6.04813	5.73606	5.7331	5.4468	5.72442	5.38767	5.76349	5.63477	0.37582	0.127928	0.262607	0.247098	0.156245	0.26688
AT1G07170	PHF5-like protein	1	chr1	2200123	2201265	11.3654	11.2921	11.3711	11.4574	11.4765	11.4703	11.4332	11.2647	11.2139	11.3429	11.4681	11.3039	0.125232	0.0336885	0.179295	-0.038941	0.627151	0.452349
AT1G07175		1	chr1	2202330	2202774	7.80419	7.72042	7.52573	7.46887	7.63112	7.63155	7.5879	7.79168	7.16363	7.68345	7.57718	7.5144	-0.106265	0.350905	0.378229	-0.169045	0.469889	0.398395
AT_1_+_2_2203851-2204003		1	chr1	2203852	2204004	4.87802	5.10589	5.14717	5.08026	4.91019	4.91582	5.10072	5.34371	5.21614	5.04369	4.96876	5.22019	-0.074935	0.503321	0.439864	0.176497	0.183548	0.28089
AT1G07180	alternative NAD(P)H dehydrogenase 1	1	chr1	2204320	2206934	6.32531	6.43058	6.54128	6.43917	6.33051	6.36554	6.405	6.13435	6.34904	6.43239	6.37841	6.29613	-0.0539805	0.497554	0.437573	-0.136259	0.262825	0.317966
AT1G07190		1	chr1	2208013	2208177	5.51673	5.44233	5.58729	4.84485	5.5223	5.56131	5.22635	5.25785	5.57631	5.51545	5.30949	5.3535	-0.205963	0.470511	0.426568	-0.161945	0.282425	0.326423
AT1G07200	Double Clp-N motif-containing P-loop nucleoside triphosphate hydrolases superfamily protein	0	chr1	2208719	2212546	7.11974	7.12026	7.26703	7.40059	7.40237	7.34627	7.31117	7.21568	7.42728	7.16901	7.38308	7.31804	0.214069	0.0357335	0.182301	0.149033	0.133454	0.253763
AT1G07210	Ribosomal protein S18	1	chr1	2215223	2216982	11.3084	11.4765	11.6722	11.3301	11.2575	11.341	11.373	11.3233	11.0976	11.4857	11.3095	11.2647	-0.176187	0.23159	0.321132	-0.221064	0.180065	0.278843
AT1G07220	Arabidopsis thaliana protein of unknown function (DUF821)	0	chr1	2216925	2219474	8.68686	8.84795	9.0834	8.81405	8.82135	8.7032	8.71979	8.84479	8.71418	8.87274	8.77954	8.75958	-0.0932008	0.509873	0.442358	-0.113152	0.435724	0.386436
AT1G07230	non-specific phospholipase C1	0	chr1	2220253	2222982	9.5986	9.57827	9.69725	9.89568	9.78273	9.80752	9.77125	9.73646	9.68298	9.62471	9.82864	9.73023	0.203937	0.0155146	0.146691	0.105526	0.0858708	0.228563
AT1G07240	UDP-glucosyl transferase 71C5	1	chr1	2223691	2225452	11.5405	11.4722	11.4885	11.6969	11.7656	11.7359	11.5846	11.6019	11.7385	11.5004	11.7328	11.6416	0.232418	0.00126192	0.0859567	0.141272	0.0846283	0.228231
AT1G07250	UDP-glucosyl transferase 71C4	1	chr1	2225900	2227566	10.3117	10.371	10.2424	10.3102	10.2933	10.315	10.2251	10.2187	10.4116	10.3084	10.3062	10.2851	-0.0021658	0.959194	0.57909	-0.0232456	0.770811	0.496959
AT1G07260	UDP-glucosyl transferase 71C3	0	chr1	2227594	2229319	9.3284	9.56352	9.62511	9.23684	9.29815	9.15558	9.55909	9.62186	9.48357	9.50568	9.23019	9.55484	-0.275487	0.075098	0.222685	0.0491598	0.655933	0.461891
AT1G07270	Cell division control, Cdc6	0	chr1	2229757	2232897	5.92627	5.99684	6.17375	6.05859	5.90051	6.04486	6.19304	6.28677	5.77892	6.03229	6.00132	6.08624	-0.0309657	0.748367	0.521228	0.0539571	0.775949	0.498292
AT_1_-_1_2233436-2233549		0	chr1	2233437	2233550	5.90241	6.1509	6.16948	5.93483	5.53832	6.06018	5.85507	6.05995	5.56575	6.07426	5.84444	5.82692	-0.229818	0.287398	0.349338	-0.247341	0.228199	0.302119
AT_1_-_2_2237251-2237343		0	chr1	2237252	2237344	5.46992	5.32524	5.45386	5.35283	5.56755	5.56353	5.26042	5.58947	5.43446	5.41634	5.49464	5.42812	0.0782993	0.414306	0.404474	0.011779	0.918421	0.537704
AT1G07280	Tetratricopeptide repeat (TPR)-like superfamily protein	1	chr1	2238087	2241217	5.98819	6.23336	6.26084	6.12033	5.94181	6.1341	6.39021	6.1347	6.12529	6.1608	6.06542	6.21673	-0.0953802	0.426092	0.409221	0.0559331	0.672012	0.466937
AT1G07290	golgi nucleotide sugar transporter 2	0	chr1	2242256	2244428	8.33433	8.34475	8.40217	8.26893	8.41578	8.45211	8.28415	8.17971	8.20122	8.36042	8.37894	8.2217	0.0185211	0.780392	0.530943	-0.138724	0.028146	0.188784
AT1G07300	josephin protein-related	0	chr1	2245758	2246492	9.12557	9.08363	9.01068	9.45301	9.42473	9.6087	8.97656	9.07627	9.32083	9.07329	9.49548	9.12455	0.422192	0.00624843	0.120747	0.0512598	0.673435	0.467485
AT1G07310	Calcium-dependent lipid-binding (CaLB domain) family protein	0	chr1	2247509	2248961	12.174	12.2849	12.1811	12.3732	12.3978	12.3759	12.3793	12.4287	12.4461	12.2133	12.3823	12.418	0.168986	0.0369802	0.183554	0.204732	0.0139427	0.173956
AT1G07320	ribosomal protein L4	1	chr1	2249133	2250529	10.6979	10.5126	10.7805	10.6396	10.6537	10.5927	10.6179	10.5663	10.6959	10.6637	10.6287	10.6267	-0.0350002	0.705144	0.507899	-0.0369753	0.702944	0.477059
AT1G07330		1	chr1	2251131	2253585	5.33715	4.9194	4.78223	5.20612	5.15216	5.17577	5.22459	6.06397	4.98214	5.01292	5.17802	5.42357	0.165096	0.426925	0.409643	0.410643	0.346279	0.352583
AT1G07340	sugar transporter 2	1	chr1	2254822	2256850	4.63311	4.23718	4.44898	4.45213	4.83627	4.57714	4.52641	4.40354	4.13002	4.43976	4.62184	4.35332	0.182084	0.320968	0.365151	-0.086435	0.625512	0.451909
AT1G07350	RNA-binding (RRM/RBD/RNP motifs) family protein	0	chr1	2257425	2260101	8.50941	8.22299	8.12699	8.67479	8.61398	8.61014	8.19017	8.07346	8.33189	8.28646	8.63297	8.19851	0.346507	0.090059	0.234299	-0.0879544	0.561249	0.430559
AT1G07360	CCCH-type zinc fingerfamily protein with RNA-binding domain	0	chr1	2260389	2262865	9.85492	9.97823	9.95318	9.817	10.0516	9.91535	9.96477	10.048	10.0617	9.92877	9.92799	10.0248	-0.000784957	0.992555	0.587384	0.0960586	0.120857	0.246293
AT1G07370	proliferating cellular nuclear antigen 1	1	chr1	2263140	2264551	9.99225	10.077	10.1694	9.9407	9.93185	10.0127	9.95184	9.94558	9.70267	10.0795	9.96175	9.8667	-0.117787	0.133343	0.266576	-0.212846	0.105587	0.239565
AT1G07380	Neutral/alkaline non-lysosomal ceramidase	0	chr1	2264829	2268306	10.532	10.6396	10.6945	10.8486	10.7151	10.7174	10.6411	10.6211	10.6788	10.622	10.7604	10.647	0.138327	0.100873	0.243766	0.024963	0.662162	0.46357
AT_1_+_1_2268839-2268997		1	chr1	2268841	2268999	5.79345	5.6457	5.88964	5.57744	5.69601	5.93597	5.75702	6.37357	5.49104	5.77626	5.73647	5.87387	-0.0397881	0.771977	0.528869	0.0976122	0.74908	0.490764
AT_1_-_0_2269485-2269577		0	chr1	2269487	2269579	5.74817	5.49444	5.60536	5.55789	5.40468	5.75191	5.30919	5.14249	5.4511	5.61599	5.5715	5.30093	-0.0444908	0.740347	0.518747	-0.31506	0.0547106	0.208531
AT1G07390	receptor like protein 1	1	chr1	2269893	2274820	5.60522	5.97153	5.79501	5.89513	5.71707	5.58461	5.59493	5.72475	5.84411	5.79059	5.73227	5.72126	-0.0583173	0.69659	0.505239	-0.0693232	0.620286	0.449819
AT1G07400	HSP20-like chaperones superfamily protein	1	chr1	2274943	2275758	8.8108	8.59845	8.01184	8.56755	8.42944	8.47852	7.7954	7.71225	7.88235	8.4737	8.49184	7.79667	0.0181434	0.946802	0.575952	-0.677029	0.0996912	0.23567
AT1G07410	RAB GTPase homolog A2B	1	chr1	2276053	2277154	8.01237	7.9522	7.90941	7.85006	7.85345	8.07833	7.92665	7.8815	7.91096	7.95799	7.92728	7.90637	-0.0307114	0.733952	0.516737	-0.0516219	0.220021	0.29813
AT1G07420	sterol 4-alpha-methyl-oxidase 2-1	1	chr1	2277807	2280297	10.5506	10.7174	10.7093	10.454	10.5565	10.507	10.4358	10.5042	10.405	10.6591	10.5059	10.4483	-0.153243	0.0869693	0.232102	-0.210764	0.0404718	0.199127
AT1G07430	highly ABA-induced PP2C gene 2	0	chr1	2280835	2282828	6.3389	5.98256	5.82442	5.98075	5.98765	5.52736	6.24427	6.47197	6.63548	6.04863	5.83192	6.45058	-0.216711	0.371038	0.386677	0.401947	0.107196	0.240765
AT1G07440	NAD(P)-binding Rossmann-fold superfamily protein	0	chr1	2286149	2287730	6.1658	6.14809	6.64512	6.27346	6.30496	6.37402	6.40978	6.09852	6.37488	6.31967	6.31748	6.29439	-0.00218695	0.990589	0.586864	-0.0252757	0.902029	0.533648
AT1G07450	NAD(P)-binding Rossmann-fold superfamily protein	0	chr1	2287926	2289336	4.90656	4.78101	5.15204	4.84387	5.31493	5.22395	5.374	4.82853	5.10771	4.94653	5.12758	5.10341	0.181049	0.377206	0.389214	0.156875	0.463974	0.396482
AT1G07460	Concanavalin A-like lectin family protein	1	chr1	2290201	2290977	6.11601	6.20908	5.50228	5.69648	5.95429	5.67016	6.14681	6.10419	6.21392	5.94246	5.77364	6.15497	-0.168814	0.537821	0.452394	0.212515	0.439477	0.387579
AT1G07470	Transcription factor IIA, alpha/beta subunit	1	chr1	2291457	2294588	9.28938	9.35041	9.314	9.17333	9.27652	9.18108	9.29889	9.25588	9.36098	9.31793	9.21031	9.30525	-0.10762	0.0631506	0.212389	-0.0126825	0.741598	0.488405
AT1G07473		0	chr1	2294566	2295489	5.21242	5.37948	5.33839	5.13779	5.34681	5.32301	5.02274	5.50377	5.45578	5.3101	5.2692	5.32743	-0.0408926	0.649819	0.490391	0.017335	0.922526	0.53887
AT1G07476		1	chr1	2295751	2296497	4.89332	4.81883	4.65075	4.88978	4.63819	4.83032	4.70886	4.79055	5.06839	4.78764	4.7861	4.85593	-0.00153675	0.988968	0.586651	0.0682985	0.631984	0.454184
AT1G07480	Transcription factor IIA, alpha/beta subunit	0	chr1	2296023	2299470	5.22111	4.90163	4.78641	4.89858	4.99563	5.17412	4.96259	5.54839	4.88617	4.96972	5.02278	5.13238	0.0530584	0.7495	0.521616	0.162663	0.551633	0.427321
CUFF.3235		0	chr1	2300834	2301075	5.32852	5.01791	5.32087	4.98938	5.05596	5.13903	5.16797	4.99689	4.80379	5.22243	5.06146	4.98955	-0.160976	0.252844	0.332228	-0.23288	0.187719	0.283572
AT1G07485		1	chr1	2301375	2302121	5.94386	6.06501	5.77449	6.0232	5.79852	5.86144	5.80041	6.18704	5.85751	5.92778	5.89439	5.94832	-0.0333965	0.772513	0.529065	0.0205364	0.896416	0.531996
AT1G07490	ROTUNDIFOLIA like 3	0	chr1	2301380	2302021	6.75354	6.7547	7.16173	6.8114	6.84528	6.86553	6.75221	6.78953	6.52772	6.88999	6.84074	6.68982	-0.0492537	0.752449	0.522451	-0.200173	0.2891	0.328979
AT1G07500		0	chr1	2304766	2305031	8.72352	8.43905	8.16941	9.44953	9.44433	9.3407	8.90549	9.06127	8.86822	8.444	9.41152	8.94499	0.967525	0.0220034	0.160622	0.500998	0.074479	0.220974
AT1G07510	FTSH protease 10	1	chr1	2305378	2309544	10.7376	10.9633	10.9789	10.8559	10.7199	10.8233	10.9493	11.0183	10.9582	10.8933	10.7997	10.9753	-0.0936046	0.365298	0.384344	0.0819892	0.405252	0.375831
AT1G07520	GRAS family transcription factor	0	chr1	2309564	2311805	10.5117	10.5412	10.564	10.5539	10.4706	10.6012	10.658	10.6876	10.7108	10.539	10.5419	10.6855	0.00294405	0.947964	0.576319	0.146494	0.0024336	0.125822
AT1G07530	SCARECROW-like 14	0	chr1	2313582	2316469	9.7374	9.79815	9.88099	9.91935	9.9323	9.93561	9.9377	10.0425	10.1597	9.80551	9.92908	10.0466	0.123572	0.0951352	0.238748	0.241122	0.0424734	0.199716
AT1G07540	TRF-like 2	0	chr1	2318433	2321048	5.05969	4.82089	4.76716	4.88011	4.79927	4.59647	4.95188	5.11579	4.95054	4.88258	4.75861	5.00607	-0.123965	0.371769	0.386855	0.123492	0.318456	0.340767
AT_1_-_1_2321744-2321953		0	chr1	2321747	2321956	5.60202	5.53663	5.80202	5.43852	5.71593	5.78883	5.94656	6.96028	5.91501	5.64689	5.64776	6.27395	0.000873171	0.99511	0.587954	0.62706	0.204771	0.291353
AT1G07550	Leucine-rich repeat protein kinase family protein	0	chr1	2322653	2326561	7.74032	7.61159	7.72547	8.15623	8.24058	8.03268	7.78925	7.77954	7.84922	7.69246	8.14316	7.806	0.450703	0.00529207	0.11453	0.113547	0.0890552	0.230184
AT1G07560	Leucine-rich repeat protein kinase family protein	1	chr1	2327320	2331096	9.94228	9.8191	9.68755	10.1227	10.1151	10.0888	9.79645	9.73784	9.88718	9.81631	10.1089	9.80715	0.292576	0.0552263	0.20492	-0.0091544	0.920942	0.538448
AT1G07570	Protein kinase superfamily protein	0	chr1	2331170	2333738	9.63748	9.62203	9.64327	9.62431	9.5759	9.72468	9.46165	9.50191	9.46981	9.63426	9.64163	9.47779	0.00736875	0.882564	0.559653	-0.156469	0.0014935	0.109029
AT_1_-_1_2335850-2335954		0	chr1	2335853	2335957	4.3286	4.97702	4.45862	5.6166	4.82478	4.9571	5.05399	4.70625	5.05297	4.58808	5.13283	4.93774	0.544746	0.161879	0.284938	0.349656	0.218664	0.297355
AT1G07590	Tetratricopeptide repeat (TPR)-like superfamily protein	0	chr1	2336523	2339391	7.49256	7.54294	7.63155	7.36521	7.44747	7.58152	7.27749	7.26559	7.44417	7.55569	7.46473	7.32908	-0.0909558	0.302323	0.35646	-0.226603	0.0378425	0.196595
AT1G07600	metallothionein 1A	0	chr1	2338904	2339321	17.4674	17.3777	17.4204	17.4204	17.4674	17.6895	17.4674	17.6895	17.3483	17.4218	17.5257	17.5017	0.103915	0.337116	0.372621	0.0798662	0.511819	0.413964
AT1G07610	metallothionein 1C	1	chr1	2341542	2342123	15.4489	15.3204	15.497	15.4345	15.4084	15.6073	15.8192	15.808	15.6354	15.4221	15.4834	15.7542	0.0613035	0.495883	0.43684	0.33212	0.0143578	0.173956
AT1G07615	GTP-binding protein Obg/CgtA	0	chr1	2342198	2344271	8.6148	8.84816	8.95186	8.74168	8.71909	8.75649	8.68646	8.77326	8.52417	8.80494	8.73909	8.6613	-0.0658516	0.577416	0.46611	-0.143643	0.315016	0.339462
AT1G07620	GTP-binding protein Obg/CgtA	0	chr1	2344390	2346842	8.14454	8.21322	7.7788	8.4154	8.63944	8.66312	8.506	8.57445	8.70475	8.04552	8.57266	8.59507	0.527132	0.0387861	0.185748	0.549547	0.0392774	0.197643
AT1G07630	pol-like 5	1	chr1	2349097	2351692	8.89669	9.00939	8.67119	8.9926	9.04762	9.03946	8.86265	9.01599	8.89802	8.85909	9.02656	8.92555	0.167472	0.231822	0.321242	0.0664628	0.589728	0.439343
AT1G07640	Dof-type zinc finger DNA-binding family protein	0	chr1	2354354	2356227	9.49122	9.58908	9.87255	9.60952	9.56473	9.58355	9.55695	9.65865	9.39222	9.65095	9.58593	9.53594	-0.0650197	0.627737	0.482689	-0.115014	0.457999	0.394241
AT1G07650	Leucine-rich repeat transmembrane protein kinase	0	chr1	2359549	2366561	7.00741	6.93388	6.92076	6.97002	6.98792	7.031	6.93744	7.13009	7.28977	6.95401	6.99631	7.1191	0.0422967	0.271877	0.342127	0.165084	0.24257	0.308595
AT1G07645	dessication-induced 1VOC superfamily protein	0	chr1	2367437	2368385	5.15084	5.03152	5.29765	5.03358	5.01469	5.1192	5.13347	5.22899	5.29722	5.16	5.05582	5.21989	-0.10418	0.309713	0.360105	0.0598903	0.550779	0.427094
AT1G07660	Histone superfamily protein	1	chr1	2368837	2369734	13.6796	13.8096	13.7769	13.5618	13.721	13.5776	13.5776	13.51	13.7507	13.7554	13.6201	13.6128	-0.135235	0.106412	0.248007	-0.142624	0.176211	0.276917
AT1G07670	endomembrane-type CA-ATPase 4	0	chr1	2370052	2374545	8.742	9.05813	9.00589	8.884	8.91055	8.88525	8.82122	8.83614	8.73462	8.93534	8.89327	8.79733	-0.0420725	0.709547	0.50936	-0.138011	0.291815	0.329994
AT1G07680		1	chr1	2376012	2377186	6.14511	5.97692	5.74901	6.0131	6.08292	5.96206	6.09656	6.15702	5.6234	5.95701	6.01936	5.959	0.0623505	0.647893	0.489582	0.00198509	0.992763	0.556524
AT1G07690		1	chr1	2378076	2379000	5.80258	5.85163	5.77158	7.38763	6.06811	5.88063	6.06978	6.10549	5.76781	5.8086	6.44546	5.98103	0.636863	0.311265	0.360782	0.172428	0.245729	0.309619
AT1G07700	Thioredoxin superfamily protein	1	chr1	2379647	2381362	10.3391	10.1326	10.0961	10.4273	10.5032	10.4507	10.4152	10.4724	10.7344	10.1892	10.4604	10.5407	0.271156	0.0597316	0.209463	0.351423	0.0507982	0.205535
AT1G07705	NOT2 / NOT3 / NOT5 family	1	chr1	2381615	2386092	8.21545	8.37051	8.40583	8.29844	8.19496	8.2868	8.4928	8.30907	8.3317	8.3306	8.26007	8.37785	-0.0705319	0.366659	0.384851	0.0472548	0.596363	0.441735
AT1G07702	snoRNA	0	chr1	2382251	2382331	7.82572	7.66716	7.74939	7.44818	7.47999	7.63168	7.59908	7.78815	7.34627	7.74742	7.51995	7.57783	-0.227473	0.037512	0.184172	-0.16959	0.316187	0.339937
AT1G07710	Ankyrin repeat family protein	0	chr1	2386275	2387986	6.61303	6.7877	6.77504	6.73238	6.81574	6.54436	6.3708	6.69664	6.56548	6.72525	6.69749	6.54431	-0.0277612	0.79256	0.534315	-0.180949	0.191653	0.285627
AT1G07720	3-ketoacyl-CoA synthase 3	0	chr1	2390655	2392453	5.64714	5.76894	5.43935	5.69062	5.61721	5.83883	5.87333	5.61046	5.78431	5.61848	5.71555	5.75603	0.097078	0.456517	0.421667	0.13756	0.329977	0.345214
CUFF.3467		1	chr1	2393803	2394419	4.59916	4.90135	4.82276	4.471	4.79366	4.92693	6.34484	4.48303	4.71262	4.77442	4.73053	5.18016	-0.0438901	0.802674	0.537326	0.405742	0.561687	0.430687
AT1G07725	exocyst subunit exo70 family protein H6	0	chr1	2394801	2397272	4.83356	4.931	4.74308	5.07953	4.92039	4.59971	4.89934	5.1546	4.89766	4.83588	4.86654	4.98387	0.0306614	0.854198	0.552026	0.147985	0.229528	0.302461
AT1G07728	other RNA	1	chr1	2395451	2397345	10.2785	10.2629	10.2576	10.3399	10.4599	10.4289	10.3905	10.3633	10.413	10.2663	10.4096	10.3889	0.143231	0.0537338	0.203693	0.122595	0.00605195	0.152994
AT1G07740	Tetratricopeptide repeat (TPR)-like superfamily protein	0	chr1	2397442	2400508	11.2379	11.2805	11.2725	11.1973	11.0799	11.1411	11.1448	11.163	11.2274	11.2636	11.1394	11.1784	-0.12417	0.052524	0.202198	-0.0852065	0.0566359	0.210102
AT1G07730	Disease resistance-responsive (dirigent-like protein) family protein	0	chr1	2397527	2398696	10.3153	10.1506	10.1375	10.1992	10.0699	10.0471	10.0942	10.2161	10.3128	10.2011	10.1054	10.2077	-0.0957453	0.269175	0.340874	0.00658318	0.942227	0.544278
AT1G07745	homolog of RAD51 D	0	chr1	2400589	2402873	8.15585	8.11322	8.07856	8.17936	8.21752	8.21934	8.22886	8.05356	8.19142	8.11588	8.2054	8.15795	0.089527	0.0364194	0.183039	0.0420676	0.525027	0.418977
AT1G07747	Bifunctional inhibitor/lipid-transfer protein/seed storage 2S albumin superfamily protein	1	chr1	2403558	2403845	4.92797	5.04293	4.77287	5.21452	4.77464	5.0055	4.71482	5.0117	4.71379	4.91459	4.99822	4.81344	0.0836317	0.610673	0.477416	-0.101151	0.470305	0.398534
AT1G07750	RmlC-like cupins superfamily protein	0	chr1	2404037	2405943	12.2526	12.3407	12.3199	12.3407	12.3312	12.3885	12.3837	12.4658	12.1907	12.3044	12.3535	12.3467	0.0490661	0.209459	0.310266	0.0423274	0.662812	0.463776
AT_1_-_2_2407648-2407782		0	chr1	2407651	2407785	8.06804	7.54895	7.4655	7.80396	8.28295	7.93032	8.03147	7.72897	8.015	7.69416	8.00574	7.92515	0.311582	0.263192	0.33811	0.230988	0.35636	0.356097
AT1G07770	ribosomal protein S15A	0	chr1	2408203	2409580	12.9055	12.9752	13.08	12.9682	12.9133	12.9701	12.9517	12.8349	12.6638	12.9869	12.9505	12.8168	-0.0363462	0.557384	0.459121	-0.170056	0.172088	0.274943
AT1G07780	phosphoribosylanthranilate isomerase 1	0	chr1	2410056	2412677	9.41162	9.30276	9.37516	9.18227	9.2754	9.31582	9.3251	9.30485	9.17041	9.36318	9.25783	9.26679	-0.105347	0.110117	0.250174	-0.0963918	0.183624	0.28089
AT1G07790	Histone superfamily protein	1	chr1	2412980	2413708	10.9454	11.082	11.1564	10.5547	10.5623	10.679	10.815	10.9354	10.7919	11.0613	10.5987	10.8474	-0.4626	0.00538192	0.114749	-0.213853	0.0539433	0.207814
AT1G07795		1	chr1	2414286	2414967	5.05156	4.87945	5.0078	4.97092	5.26265	5.03582	4.99996	4.91493	5.03748	4.97961	5.0898	4.98412	0.110192	0.355824	0.380485	0.00451729	0.946739	0.545423
AT1G07800	transposable element gene	1	chr1	2415041	2415970	5.06043	5.14789	4.79756	5.31347	4.97867	4.99423	5.14137	5.42486	4.74295	5.00196	5.09546	5.10306	0.0934973	0.57084	0.46396	0.1011	0.681988	0.470312
AT1G07810	ER-type Ca2+-ATPase 1	1	chr1	2416265	2420757	10.9263	11.1755	11.1151	10.984	10.9058	10.9994	11.0668	10.9992	10.8702	11.0723	10.9631	10.9787	-0.109196	0.281157	0.346796	-0.0935489	0.382467	0.367357
AT1G07820	Histone superfamily protein	0	chr1	2421216	2421947	12.1991	12.3519	12.4437	12.0692	12.1039	12.1155	12.2187	12.2172	12.1915	12.3316	12.0962	12.2091	-0.235344	0.0758136	0.223256	-0.122428	0.226864	0.301305
AT1G07830	ribosomal protein L29 family protein	1	chr1	2422241	2423655	11.8374	12.0076	12.2617	11.8324	11.8644	11.9159	11.7973	11.7385	11.535	12.0356	11.8709	11.6903	-0.164725	0.312079	0.361139	-0.345344	0.0892383	0.23035
AT1G07840	Sas10/Utp3/C1D family	1	chr1	2424054	2426676	8.12432	8.2228	8.35533	8.33828	8.27623	8.33139	8.16108	8.11742	8.21248	8.23415	8.3153	8.16366	0.0811503	0.349445	0.377535	-0.0704869	0.410116	0.377414
AT1G07850	Protein of unknown function (DUF604)	1	chr1	2426745	2428719	5.1437	5.3322	5.30509	5.35266	5.39426	5.29125	5.26631	5.38147	5.33478	5.26033	5.34606	5.32752	0.085726	0.285694	0.34882	0.0671936	0.390398	0.369965
AT1G07870	Protein kinase superfamily protein	0	chr1	2428773	2432057	10.247	10.0873	9.95147	10.2256	10.2444	10.2077	10.1862	10.3066	10.3571	10.0953	10.2259	10.2833	0.130621	0.264785	0.33852	0.188077	0.147378	0.261657
AT1G07860		0	chr1	2428911	2429431	5.58729	5.4596	5.5975	5.6238	5.54403	5.45682	5.73652	5.38927	5.28317	5.54813	5.54155	5.46965	-0.00657612	0.924915	0.570729	-0.0784756	0.631772	0.454089
AT1G07880	Protein kinase superfamily protein	0	chr1	2434030	2435763	7.7096	7.68826	7.95297	8.03023	7.85692	7.79281	8.09813	8.15411	7.86617	7.78361	7.89332	8.03947	0.109708	0.379117	0.389783	0.255857	0.10486	0.239202
AT1G07885		0	chr1	2436467	2436959	4.85993	4.6183	4.96515	4.95013	5.36737	5.03462	5.29345	5.01127	5.16753	4.81446	5.11737	5.15742	0.302912	0.140939	0.271659	0.342956	0.0621728	0.214125
AT1G07890	ascorbate peroxidase 1	1	chr1	2437330	2439665	15.6464	15.808	15.6073	15.6018	15.5016	15.7115	15.7492	15.8597	15.4874	15.6872	15.605	15.6988	-0.0822607	0.394518	0.396745	0.0115436	0.932734	0.541802
AT1G07900	LOB domain-containing protein 1	1	chr1	2442622	2443632	5.27213	5.36109	5.39879	5.68284	5.58563	5.37345	5.68713	5.50198	5.58429	5.344	5.54731	5.59113	0.203309	0.143342	0.27335	0.247133	0.0237416	0.185854
AT1G07901		0	chr1	2443971	2444123	5.21367	5.56685	5.47772	5.45959	5.40796	5.34905	5.49174	5.13137	5.47652	5.41941	5.40553	5.36654	-0.0138826	0.910126	0.566813	-0.0528708	0.755481	0.492737
AT1G07910	RNAligase	1	chr1	2445470	2454645	8.34379	8.44465	8.53973	8.38229	8.40688	8.31159	8.37536	8.46437	8.37279	8.44272	8.36692	8.40417	-0.0758038	0.318664	0.36416	-0.0385468	0.589296	0.439199
AT1G07920	GTP binding Elongation factor Tu family protein	1	chr1	2454846	2457321	15.929	16.2559	16.2559	15.9079	15.9855	16.164	16.1983	16.2559	15.9079	16.1469	16.0191	16.1207	-0.127797	0.396291	0.39745	-0.0262067	0.872486	0.525335
AT1G07930	GTP binding Elongation factor Tu family protein	1	chr1	2458244	2460790	9.48731	9.70741	9.80661	9.67711	9.5777	9.6161	9.72692	9.76112	9.44683	9.66711	9.62363	9.64496	-0.0434739	0.696507	0.505235	-0.0221513	0.879549	0.527071
AT_1_-_1_2462174-2462332		0	chr1	2462177	2462335	4.66351	4.94873	5.00399	4.69831	4.40603	4.81053	4.52495	4.7067	4.6598	4.87208	4.63829	4.63049	-0.233783	0.219459	0.315161	-0.24159	0.13485	0.254651
AT1G07940	GTP binding Elongation factor Tu family protein	0	chr1	2462953	2465504	15.6073	15.8597	15.9691	15.6189	15.6018	15.8813	15.8813	16.0313	15.4629	15.812	15.7006	15.7918	-0.111398	0.472499	0.427444	-0.0202127	0.925587	0.539878
AT1G07950	Surfeit locus protein 5 subunit 22 of Mediator complex	0	chr1	2465770	2467022	10.0469	10.1492	10.1105	10.0844	10.2335	10.1922	10.0997	10.0536	10.1422	10.1022	10.1701	10.0985	0.0678311	0.283069	0.34778	-0.00371642	0.929326	0.540869
AT1G07960	PDI-like 5-1	1	chr1	2467161	2469154	10.9395	10.9429	11.0948	10.9801	11.0077	11.1063	10.9477	10.9567	10.7021	10.9924	11.0314	10.8688	0.0389934	0.577349	0.46611	-0.123563	0.288192	0.328598
AT1G07970		0	chr1	2469286	2472628	8.80598	8.93333	9.0868	8.80613	8.90127	8.77867	8.7942	8.86027	8.80759	8.94204	8.82869	8.82069	-0.113348	0.299412	0.355043	-0.121349	0.27091	0.321323
AT1G07980	nuclear factor Y, subunit C10	0	chr1	2473165	2474927	9.61461	9.43266	9.58531	9.72382	9.65998	9.61929	9.57551	9.50524	9.6953	9.54419	9.6677	9.59202	0.123503	0.147396	0.275261	0.0478216	0.578176	0.435798
AT1G07985	Expressed protein	1	chr1	2475405	2476155	6.64585	7.22412	7.77947	6.72008	7.00204	6.51512	7.19681	7.58585	8.03846	7.21648	6.74575	7.60704	-0.470733	0.286737	0.349074	0.390557	0.396552	0.372326
AT1G07990	SIT4 phosphatase-associated family protein	1	chr1	2477157	2483138	8.5974	8.61606	8.52012	8.55979	8.64184	8.65404	8.63914	8.57555	8.63467	8.57786	8.61856	8.61645	0.0406965	0.384282	0.392285	0.0385942	0.348426	0.353318
AT1G08000	GATA transcription factor 10	0	chr1	2483240	2485109	7.67052	7.94191	7.84705	7.79118	7.6752	8.13592	7.86759	7.57007	7.78488	7.81982	7.86744	7.74085	0.0476112	0.783814	0.532145	-0.0789784	0.5439	0.424658
AT1G08005		1	chr1	2485344	2485511	7.30077	7.24999	7.10309	7.18716	7.30555	7.13383	7.26983	7.34997	7.66695	7.21795	7.20885	7.42892	-0.00910343	0.912868	0.567543	0.210965	0.218881	0.297422
AT1G08010	GATA transcription factor 11	0	chr1	2485906	2488027	8.49175	8.51654	8.56552	8.4469	8.41873	8.55257	8.44772	8.73635	8.31958	8.5246	8.47273	8.50122	-0.0518697	0.341661	0.374562	-0.023387	0.868097	0.524227
AT1G08030	tyrosylprotein sulfotransferase	0	chr1	2489501	2493250	8.48324	8.44479	8.50251	8.43112	8.42733	8.51708	8.50506	8.37527	8.32362	8.47685	8.45851	8.40132	-0.0183351	0.623576	0.481483	-0.0755308	0.294722	0.331076
AT1G08032		1	chr1	2494123	2494315	6.02543	6.015	6.43515	6.10591	6.08893	5.73827	5.81743	5.84108	5.85318	6.15852	5.9777	5.83723	-0.180824	0.380138	0.390133	-0.321296	0.14512	0.260777
AT1G08035		1	chr1	2494402	2495149	5.77479	5.97365	6.07706	6.02596	5.84632	6.35295	6.02545	6.13608	6.03797	5.94183	6.07508	6.0665	0.133245	0.49256	0.435612	0.124669	0.294374	0.330974
AT1G08040	Protein of unknown function (DUF707)	0	chr1	2495342	2498764	10.8314	10.8695	10.8761	10.75	10.7288	10.823	10.9192	10.8915	10.6381	10.859	10.7673	10.8163	-0.0917552	0.065701	0.215019	-0.0427316	0.681454	0.470265
AT1G08050	Zinc finger (C3HC4-type RING finger) family protein	0	chr1	2498836	2501427	9.57072	9.59882	9.0945	9.5298	9.74538	9.48886	9.80854	9.79581	9.59055	9.42135	9.58801	9.73163	0.166666	0.4294	0.4106	0.310286	0.189377	0.284375
AT1G08060	ATP-dependent helicase family protein	0	chr1	2501742	2511084	7.99863	8.28163	8.30328	8.18159	8.14718	8.2352	8.20284	8.13452	7.99622	8.19451	8.18799	8.11119	-0.00652307	0.953942	0.577584	-0.0833223	0.517701	0.41631
AT1G08065	alpha carbonic anhydrase 5	0	chr1	2511647	2513454	5.73922	5.747	5.78937	5.74032	5.83556	5.92396	5.88581	5.63717	5.71298	5.75853	5.83328	5.74532	0.074747	0.291937	0.350968	-0.0132152	0.875506	0.526146
AT1G08070	Tetratricopeptide repeat (TPR)-like superfamily protein	0	chr1	2514192	2516605	5.90062	5.95302	6.05817	6.08663	6.24293	6.29165	6.17517	6.09292	6.2944	5.9706	6.20707	6.18749	0.236468	0.0416155	0.189314	0.216892	0.0466144	0.202523
AT1G08080	alpha carbonic anhydrase 7	0	chr1	2516991	2518546	5.91505	5.69486	5.79573	6.09939	5.84522	5.97087	5.7232	5.541	5.66299	5.80188	5.97183	5.6424	0.169946	0.15649	0.281002	-0.159484	0.129776	0.2521
AT_1_+_0_2520298-2520390		1	chr1	2520301	2520393	5.43897	5.1531	5.49153	5.42474	5.31487	5.20216	5.3334	5.19371	5.10365	5.3612	5.31392	5.21025	-0.0472757	0.724574	0.513904	-0.150946	0.303344	0.33476
AT1G08090	nitrate transporter 2:1	1	chr1	2524076	2526164	15.278	15.2717	15.0225	15.0664	14.9057	14.9979	15.3662	15.4345	15.3204	15.1908	14.99	15.3737	-0.200766	0.124517	0.260165	0.182937	0.149909	0.263073
AT1G08100	nitrate transporter 2.2	0	chr1	2527170	2529120	8.39343	8.27719	7.62212	7.67972	7.68052	7.61234	7.93832	7.87386	7.7876	8.09758	7.65752	7.86659	-0.440057	0.207371	0.308903	-0.230987	0.438407	0.387377
AT1G08105	transposable element gene	0	chr1	2531695	2534786	5.84208	5.7623	5.68235	5.97084	5.66488	5.66899	5.78694	5.45034	5.84848	5.76224	5.76823	5.69525	0.00599088	0.960691	0.579557	-0.06699	0.652571	0.460816
AT1G08110	lactoylglutathione lyase family protein / glyoxalase I family protein	1	chr1	2535328	2537931	12.6946	12.6121	12.7785	12.9245	12.9184	12.8913	12.5922	12.5693	12.5815	12.6951	12.9114	12.581	0.216333	0.0407733	0.188573	-0.114057	0.138264	0.256755
AT1G08115	snRNA	0	chr1	2538076	2538237	15.0471	14.8488	14.6031	15.0563	15.1709	14.5848	14.8965	14.3245	15.2077	14.833	14.9374	14.8096	0.104345	0.663243	0.494568	-0.0234231	0.940569	0.544036
AT1G08120		1	chr1	2538615	2539661	5.52104	5.71744	5.37967	5.3932	5.57169	5.15584	5.44708	5.0116	5.3728	5.53938	5.37358	5.27716	-0.165807	0.347969	0.376968	-0.262224	0.196739	0.288303
AT1G08125	S-adenosyl-L-methionine-dependent methyltransferases superfamily protein	0	chr1	2539614	2542334	8.91938	8.76206	8.90859	8.80382	8.74059	8.80413	8.77239	8.68543	8.67676	8.86334	8.78285	8.71153	-0.0804928	0.249784	0.330568	-0.151815	0.0758585	0.221841
AT1G08130	DNA ligase 1	0	chr1	2542702	2547946	7.42129	7.52929	7.63057	7.73971	7.21785	7.61196	7.68339	7.57403	7.46336	7.52705	7.52317	7.57359	-0.00387702	0.983282	0.585154	0.0465441	0.623659	0.451028
AT1G08135	cation/H+ exchanger 6B	0	chr1	2548819	2551473	5.78679	5.77146	5.99724	5.72486	5.69375	5.9513	5.71956	5.2599	5.60329	5.85183	5.78997	5.52758	-0.0618607	0.601205	0.474412	-0.324247	0.128206	0.251227
AT1G08140	cation/H+ exchanger 6A	0	chr1	2552036	2555161	5.28044	5.30926	5.09521	5.1686	5.34008	4.95006	5.16447	4.71749	5.25861	5.2283	5.15291	5.04686	-0.0753923	0.603085	0.47519	-0.181447	0.396753	0.372342
AT1G08150	Cation/hydrogen exchanger family protein	0	chr1	2556343	2559074	5.0718	5.59213	5.20296	5.203	5.05946	5.0251	5.48417	5.04441	5.39098	5.28896	5.09585	5.30652	-0.193113	0.343106	0.375017	0.0175582	0.93617	0.542571
AT1G08160	Late embryogenesis abundant (LEA) hydroxyproline-rich glycoprotein family	0	chr1	2559487	2560403	10.5042	10.7626	10.9158	10.6274	10.4703	10.5438	10.7925	10.8086	10.6114	10.7275	10.5471	10.7375	-0.180391	0.269106	0.340845	0.00998221	0.945959	0.545274
AT1G08165		0	chr1	2561627	2562148	5.56149	5.87646	6.14612	5.58427	5.40121	5.31512	5.745	5.80033	5.6765	5.86136	5.43353	5.74061	-0.427823	0.110649	0.250196	-0.120745	0.551554	0.427321
AT1G08170	Histone superfamily protein	0	chr1	2562941	2563672	4.8173	4.53194	4.76631	4.28308	4.55061	4.77229	4.79067	4.91172	4.80443	4.70518	4.53533	4.83561	-0.169858	0.375693	0.388462	0.130425	0.274892	0.32298
AT1G08180		0	chr1	2564572	2565121	8.56033	8.52906	8.53852	8.7716	8.76565	8.8025	8.59917	8.7115	8.84327	8.54263	8.77991	8.71798	0.237279	0.000114492	0.0646378	0.175348	0.128495	0.251347
AT1G08190	vacuolar protein sorting 41	1	chr1	2567475	2573393	9.98609	10.0776	10.0067	10.0214	10.0151	9.95253	10.0901	10.0074	10.2241	10.0235	9.99636	10.1072	-0.0270962	0.488337	0.433619	0.0837176	0.318779	0.340825
AT1G08200	UDP-D-apiose/UDP-D-xylose synthase 2	0	chr1	2573848	2576714	9.15518	9.31367	9.35902	9.17274	9.12684	9.20043	9.31367	9.37097	9.45301	9.27596	9.16667	9.37922	-0.109287	0.212262	0.311234	0.10326	0.245243	0.309362
AT1G08210	Eukaryotic aspartyl protease family protein	0	chr1	2577020	2580669	9.76886	9.66208	9.75554	9.87937	9.9251	9.92901	9.64082	9.65186	9.74123	9.72883	9.91116	9.67797	0.182329	0.0181876	0.152924	-0.0508593	0.333412	0.346666
AT1G08220		0	chr1	2581022	2583323	6.21631	6.14503	5.85109	6.01682	5.90701	5.85733	5.85358	6.07693	6.05579	6.07081	5.92705	5.99543	-0.143754	0.330061	0.369296	-0.0753738	0.604997	0.444557
AT1G08230	Transmembrane amino acid transporter family protein	0	chr1	2583654	2586744	5.68592	6.02137	5.87555	5.99497	5.59516	5.78589	6.04003	5.94213	6.21715	5.86095	5.79201	6.06644	-0.0689438	0.672054	0.49762	0.205485	0.181048	0.279292
AT1G08250	arogenate dehydratase 6	0	chr1	2588857	2590301	10.1196	10.1517	10.0203	10.0884	9.98063	9.89523	9.96125	10.0133	10.177	10.0972	9.98809	10.0505	-0.109089	0.194075	0.301764	-0.046634	0.579629	0.436125
AT1G08260	DNA polymerase epsilon catalytic subunit	1	chr1	2590944	2606892	8.15639	8.43154	8.47984	8.73748	8.58283	8.61369	8.28375	8.43795	8.37026	8.35592	8.64467	8.36399	0.288741	0.0853876	0.231063	0.00806431	0.946636	0.545423
AT1G08270		0	chr1	2606269	2607507	7.54212	7.49705	7.33616	7.50099	7.50471	7.52573	7.40456	7.603	7.84596	7.45844	7.51048	7.61784	0.0520348	0.493371	0.435992	0.159394	0.346084	0.352506
AT1G08280	Glycosyltransferase family 29 (sialyltransferase) family protein	1	chr1	2608408	2609853	7.9178	8.30418	8.20744	8.10359	8.01965	8.09261	7.98978	8.02011	8.04126	8.14314	8.07195	8.01705	-0.0711871	0.605485	0.476028	-0.126087	0.390921	0.37012
AT1G08290	WIP domain protein 3	0	chr1	2609996	2613242	6.20842	6.40712	6.6443	6.51871	6.35152	6.29269	6.65054	6.54018	6.35812	6.41995	6.38764	6.51628	-0.0323077	0.835516	0.546336	0.0963331	0.565417	0.431908
AT1G08300	no vein-like	1	chr1	2614774	2618823	4.94526	4.62563	4.89819	4.96432	5.12076	5.0686	5.22243	5.1505	4.92867	4.82303	5.05123	5.10053	0.2282	0.134989	0.267776	0.277508	0.106596	0.240114
AT1G08310	alpha/beta-Hydrolases superfamily protein	1	chr1	2618647	2620452	9.04899	8.98752	8.80209	9.3251	9.36711	9.5523	9.3124	9.32306	9.46692	8.9462	9.41484	9.36746	0.468634	0.0101188	0.134282	0.42126	0.0127039	0.171715
AT1G08315	ARM repeat superfamily protein	0	chr1	2620335	2621545	9.54632	9.32306	9.20644	9.67883	9.73125	9.59802	9.71609	9.71448	9.9425	9.35861	9.66937	9.79102	0.310758	0.0743142	0.222343	0.432416	0.0290101	0.189236
AT1G08320	bZIP transcription factor family protein	0	chr1	2621904	2627848	11.1395	10.9892	10.7089	11.0665	11.0824	10.9789	11.01	10.9925	11.288	10.9458	11.0426	11.0968	0.0967663	0.527031	0.448285	0.151006	0.397966	0.372821
AT1G08340	Rho GTPase activating protein with PAK-box/P21-Rho-binding domain	1	chr1	2631068	2632871	8.18308	8.26893	8.02011	8.16457	8.10586	8.20635	8.16645	8.18858	8.40071	8.15737	8.15892	8.25191	0.00155034	0.985661	0.585755	0.094538	0.416434	0.379669
AT1G08350	Endomembrane protein 70 protein family	0	chr1	2632810	2635852	6.90256	6.80949	7.13663	6.82992	7.01766	7.04641	6.84378	6.6003	6.91749	6.94956	6.96466	6.78719	0.015103	0.90555	0.565749	-0.16237	0.300292	0.333496
AT1G08360	Ribosomal protein L1p/L10e family	1	chr1	2636011	2637915	15.2442	15.4739	15.6189	15.2646	15.2209	15.4629	15.4033	15.5807	15.134	15.4457	15.3161	15.3727	-0.12954	0.389026	0.394518	-0.0729743	0.689801	0.472552
AT1G08370	decapping 1	1	chr1	2638181	2640554	11.5515	11.7075	11.7448	11.7	11.5468	11.739	11.6514	11.6857	11.6365	11.6679	11.6619	11.6579	-0.00603857	0.945725	0.575749	-0.0100891	0.88233	0.527893
AT1G08380	photosystem I subunit O	0	chr1	2640813	2641828	10.9538	10.7977	11.4318	10.99	10.9807	10.8298	11.5201	11.458	11.6559	11.0611	10.9335	11.5447	-0.127606	0.577204	0.46611	0.483573	0.11645	0.244052
AT1G08390		1	chr1	2642214	2643285	8.04336	8.11719	8.2475	8.15042	8.1142	8.13348	8.22121	8.22114	8.19703	8.13601	8.1327	8.21313	-0.00331567	0.961076	0.579648	0.0771121	0.324942	0.343077
AT1G08400	RINT-1 / TIP-1 family	0	chr1	2643330	2646035	8.00022	8.02773	8.07963	8.12202	8.12202	8.16608	8.07926	8.03999	7.98284	8.03586	8.13671	8.03403	0.100844	0.0288436	0.171494	-0.00183067	0.962386	0.548994
AT1G08410	P-loop containing nucleoside triphosphate hydrolases superfamily protein	1	chr1	2646189	2649379	8.1031	8.4139	8.56771	8.33804	8.28452	8.22384	8.21322	8.26429	8.13141	8.36157	8.28213	8.20298	-0.0794327	0.623696	0.481483	-0.158592	0.36641	0.360414
AT1G08420	BRI1 suppressor 1 (BSU1)-like 2	1	chr1	2649537	2657120	10.2714	10.4061	10.4568	10.4289	10.3253	10.4409	10.322	10.3583	10.4097	10.3781	10.3984	10.3633	0.0202805	0.777362	0.53032	-0.0147637	0.82501	0.511748
AT1G08430	aluminum-activated malate transporter 1	1	chr1	2658716	2661029	7.39123	7.46513	7.36742	8.48658	8.57455	8.47536	8.99577	8.88815	9.1649	7.40792	8.51216	9.01627	1.10424	1.41e-05	0.0342572	1.60835	0.000890525	0.100452	1
AT1G08440	Aluminium activated malate transporter family protein	1	chr1	2663027	2665343	7.16986	6.95333	7.46827	7.00845	6.86027	6.95821	6.95133	6.70416	6.95463	7.19715	6.94231	6.87004	-0.254836	0.224736	0.318157	-0.327111	0.147546	0.261741
AT_1_+_2_2667237-2667380		1	chr1	2667240	2667383	5.17999	5.18898	5.16572	5.29238	5.35946	5.51314	5.55101	5.50224	5.47703	5.17823	5.38833	5.51009	0.210098	0.083086	0.229468	0.331862	0.00217629	0.121731
AT1G08450	calreticulin 3	0	chr1	2667798	2671892	9.09976	9.00484	9.0198	9.19684	9.13956	9.14434	8.9924	9.11695	9.14368	9.04146	9.16025	9.08434	0.118782	0.0352936	0.181426	0.0428775	0.487692	0.40502
AT1G08460	histone deacetylase 8	1	chr1	2672451	2674628	9.1518	9.13976	9.1479	9.43188	9.47184	9.39415	9.33805	9.39915	9.30798	9.14649	9.43262	9.34839	0.286134	0.00517202	0.114287	0.201904	0.015887	0.175275
AT1G08465	Plant-specific transcription factor YABBY family protein	1	chr1	2675813	2679781	5.45886	5.41691	5.25037	5.63063	5.40177	5.54581	5.57438	5.94402	5.39372	5.37538	5.52607	5.63737	0.150693	0.177971	0.293188	0.261995	0.24246	0.308493
AT1G08470	strictosidine synthase-like 3	0	chr1	2682127	2684100	9.99001	10.0709	10.0825	10.0053	9.94695	9.97231	10.1425	10.1465	10.0601	10.0478	9.97485	10.1164	-0.0729787	0.11266	0.251865	0.0685257	0.165964	0.272243
AT1G08480		1	chr1	2684234	2685621	13.7112	13.7371	13.7402	13.7989	13.7769	13.8549	13.7535	13.7769	13.708	13.7295	13.8102	13.7461	0.080713	0.0585018	0.208535	0.0165893	0.513002	0.414483
AT1G08490	chloroplastic NIFS-like cysteine desulfurase	0	chr1	2685659	2688595	9.07417	9.10901	9.16719	9.29371	9.20983	9.22794	9.21521	9.24802	9.11548	9.11679	9.24383	9.1929	0.127037	0.0271255	0.168974	0.0761139	0.19894	0.289123
AT1G08500	early nodulin-like protein 18	1	chr1	2689016	2690045	10.2566	10.1343	10.1408	10.1837	10.077	10.1868	10.1166	10.1496	9.9854	10.1772	10.1492	10.0839	-0.0280431	0.629193	0.483114	-0.0933781	0.221699	0.298926
AT1G08510	fatty acyl-ACP thioesterases B	0	chr1	2691080	2694377	9.58851	9.61267	9.56698	9.67745	9.59416	9.66852	9.89581	9.91113	9.8863	9.58939	9.64671	9.89775	0.0573235	0.149258	0.276136	0.308357	0.00020504	0.0729662
AT_1_-_2_2695528-2695635		0	chr1	2695525	2695632	5.64279	5.25479	5.66445	5.27718	5.39276	5.29068	5.28026	5.04147	5.14451	5.52068	5.32021	5.15542	-0.200466	0.267919	0.340258	-0.36526	0.0926987	0.232487
AT1G08520	ALBINA 1	1	chr1	2696412	2700959	9.20441	9.18942	9.31967	9.44131	9.30579	9.31212	9.36986	9.38995	9.3613	9.23783	9.35307	9.3737	0.11524	0.129198	0.263429	0.135867	0.0751627	0.221623
AT1G08530		1	chr1	2701226	2703091	8.38919	8.40106	8.52672	8.34091	8.24736	8.35167	8.28163	8.42334	8.52707	8.43899	8.31331	8.41068	-0.125675	0.0896878	0.234279	-0.0283079	0.755239	0.492697
AT1G08540	RNApolymerase sigma subunit 2	1	chr1	2703336	2706845	7.76621	7.87998	7.98677	7.82436	7.70672	7.80144	7.92158	7.83444	7.90251	7.87765	7.77751	7.88617	-0.100147	0.260197	0.336106	0.00852219	0.910342	0.535725
AT1G08550	non-photochemical quenching 1	1	chr1	2706924	2709531	5.40542	5.58042	5.24677	5.45516	5.58859	5.50773	5.44343	5.62929	5.58917	5.41087	5.51716	5.55396	0.106288	0.39089	0.395371	0.143093	0.284378	0.327108
AT1G08560	syntaxin of plants 111	0	chr1	2709632	2710912	10.363	10.6004	10.6551	10.3655	10.3659	10.3274	10.4879	10.5126	10.1767	10.5395	10.3529	10.3924	-0.186578	0.170511	0.288983	-0.147097	0.355827	0.355845
AT1G08570	atypical CYS HIS rich thioredoxin 4	1	chr1	2712883	2714734	11.8188	11.8518	12.0394	11.7973	11.839	11.6816	12.0595	12.092	11.9238	11.9034	11.7726	12.0251	-0.13075	0.200587	0.305399	0.121721	0.234524	0.304514
AT1G08580		0	chr1	2715079	2716404	11.4038	11.4457	11.5625	11.3233	11.4304	11.3958	11.4001	11.3958	11.3569	11.4707	11.3831	11.3843	-0.0875439	0.209826	0.310361	-0.0864084	0.204351	0.291104
AT1G08590	Leucine-rich receptor-like protein kinase family protein	1	chr1	2718778	2722221	10.7623	10.8961	10.8471	10.664	10.5752	10.8492	10.6288	10.6474	10.3306	10.8352	10.6961	10.5356	-0.139025	0.222351	0.316734	-0.299563	0.0855821	0.228369
AT1G08592		0	chr1	2718875	2721676	5.42136	5.69182	5.59149	5.58891	5.75692	5.42607	5.33235	5.82173	5.85258	5.56822	5.59064	5.66889	0.0224142	0.865545	0.555329	0.100668	0.628075	0.452589
AT1G08600	P-loop containing nucleoside triphosphate hydrolases superfamily protein	1	chr1	2723824	2733613	9.62937	9.71119	9.90662	9.77584	9.61046	9.74111	9.80515	9.79088	9.52906	9.74906	9.70914	9.70837	-0.039924	0.70422	0.507647	-0.0406944	0.755072	0.492688
AT1G08610	Pentatricopeptide repeat (PPR) superfamily protein	0	chr1	2733657	2735819	7.48834	7.7	7.77734	7.693	7.64403	7.62038	7.49739	7.58502	7.22932	7.65523	7.65247	7.43724	-0.00275869	0.977808	0.583829	-0.217984	0.191224	0.285344
AT1G08620	Transcription factor jumonji (jmj) family protein / zinc finger (C5HC2 type) family protein	1	chr1	2736774	2743758	9.60023	9.77936	9.83294	9.64578	9.65907	9.78713	9.64288	9.63235	9.62874	9.73751	9.69733	9.63466	-0.040184	0.659811	0.493354	-0.102854	0.281076	0.325749
AT1G08630	threonine aldolase 1	0	chr1	2743761	2747967	5.01473	5.02411	5.02308	5.17325	5.10108	5.20503	5.12296	5.13187	4.89274	5.02064	5.15979	5.04919	0.139147	0.044383	0.192578	0.0285498	0.750321	0.491169
AT1G08640	Chloroplast J-like domain 1	0	chr1	2748398	2751278	6.22528	6.45491	6.4053	6.52461	6.3513	6.59013	6.42973	6.45919	6.44755	6.36183	6.48868	6.44549	0.126851	0.272272	0.342323	0.0836627	0.352999	0.35466
AT1G08650	phosphoenolpyruvate carboxylase kinase 1	1	chr1	2752154	2753703	11.5782	11.4717	11.7284	11.3907	11.3943	11.4024	11.0799	11.2445	11.2539	11.5928	11.3958	11.1928	-0.196968	0.117782	0.255398	-0.399975	0.0149269	0.173956
AT1G08660	MALE GAMETOPHYTE DEFECTIVE 2	0	chr1	2757041	2759794	10.0902	10.0014	10.2073	10.0469	10.0044	10.0058	9.97444	9.87781	9.7192	10.0996	10.019	9.85715	-0.0806354	0.307331	0.358836	-0.242491	0.0666565	0.217149
AT1G08670	ENTH/VHS family protein	0	chr1	2760346	2761573	10.4693	10.409	10.3733	10.812	10.8384	10.8174	10.372	10.362	10.6533	10.4172	10.8226	10.4624	0.40545	0.00270833	0.10145	0.0452561	0.688006	0.472059
AT1G08680	ARF GAP-like zinc finger-containing protein ZIGA4	1	chr1	2762584	2768967	11.0851	11.0894	11.1299	11.0909	10.9792	11.0921	11.0166	10.99	10.939	11.1014	11.0541	10.9818	-0.0473936	0.334554	0.371409	-0.119617	0.016535	0.176251
AT1G08695	SCR-like 3	0	chr1	2769056	2769483	4.79456	4.97575	4.7645	4.76554	5.08614	4.87732	5.02567	4.57156	4.90692	4.84494	4.90967	4.83472	0.0647296	0.606246	0.476114	-0.0102221	0.950478	0.546383
AT1G08700	Presenilin-1	0	chr1	2769815	2771477	10.0812	10.1461	10.2154	10.1983	10.1945	10.2184	10.0047	9.98684	10.0738	10.1476	10.2037	10.0218	0.0561864	0.282267	0.3473	-0.125788	0.0629266	0.214796
AT1G08710	F-box family protein	1	chr1	2771633	2773460	6.47629	6.5169	6.43219	6.87865	6.68343	6.4705	6.63046	6.64995	6.66808	6.47513	6.67753	6.6495	0.202398	0.224768	0.31816	0.17437	0.00944861	0.166187
AT1G08720	Protein kinase superfamily protein	1	chr1	2774030	2779297	8.43356	8.53343	8.49632	8.53457	8.53716	8.70959	8.63877	8.62077	8.63384	8.48777	8.59377	8.63113	0.106004	0.20202	0.306158	0.143359	0.03523	0.194454
AT1G08730	Myosin family protein with Dil domain	1	chr1	2779963	2788447	6.36138	6.79399	6.66118	6.30567	6.1985	6.46176	6.45121	6.24427	6.19525	6.60552	6.32198	6.29691	-0.283539	0.145717	0.274517	-0.308604	0.123201	0.248014
AT1G08740	transposable element gene	0	chr1	2795643	2800081	6.12545	6.02513	6.15241	5.6716	5.62728	5.09488	5.81856	5.47451	5.75434	6.101	5.46459	5.68247	-0.636411	0.069653	0.218829	-0.418527	0.0449834	0.201569
AT1G08750	Peptidase C13 family	1	chr1	2801067	2804537	9.81396	9.91223	9.95066	9.72607	9.70315	9.83487	9.95401	9.9449	9.82614	9.89228	9.7547	9.90835	-0.137586	0.0749795	0.222685	0.0160687	0.795159	0.503252
AT1G08760	Plant protein of unknown function (DUF936)	1	chr1	2805371	2808621	8.1482	8.37824	8.33409	8.23562	8.25228	8.21304	8.26698	8.18549	8.3494	8.28684	8.23365	8.26729	-0.0531963	0.530507	0.449465	-0.0195538	0.830657	0.51353
AT1G08770	prenylated RAB acceptor 1.E	1	chr1	2808883	2809747	11.5134	11.3508	11.2833	11.6586	11.7351	11.633	11.4662	11.5341	11.7776	11.3825	11.6756	11.5926	0.293063	0.034059	0.179497	0.210141	0.15294	0.264867
AT1G08780	ABI3-interacting protein 3	0	chr1	2809778	2811191	10.8096	10.8016	10.9661	10.4906	10.5477	10.5445	10.6111	10.6873	10.571	10.8591	10.5276	10.6231	-0.331521	0.0166866	0.149202	-0.235962	0.0274116	0.187985
AT1G08790	Protein of unknown function (DUF1685)	1	chr1	2811989	2812646	9.59548	9.32372	9.38872	9.15538	9.23814	9.13088	9.21655	9.24474	9.51664	9.43597	9.1748	9.32598	-0.261176	0.0704952	0.21937	-0.109996	0.432912	0.385431
AT1G08800	Protein of unknown function, DUF593	0	chr1	2813061	2818008	9.55194	9.6194	9.48536	9.52543	9.59087	9.67462	9.443	9.54004	9.61287	9.55223	9.59697	9.53197	0.0447368	0.483878	0.432033	-0.0202649	0.763209	0.495024
AT1G08810	myb domain protein 60	0	chr1	2819065	2820395	5.23686	5.08383	5.36466	5.5597	5.35059	5.2934	5.47711	5.26605	5.6263	5.22845	5.40123	5.45649	0.17278	0.206221	0.308437	0.228037	0.164298	0.271722
AT1G08820	vamp/synaptobrevin-associated protein 27-2	0	chr1	2821552	2825275	11.6756	11.7561	11.8056	11.6477	11.6787	11.6353	11.5665	11.6181	11.543	11.7458	11.6539	11.5759	-0.0918811	0.124597	0.260165	-0.169897	0.026749	0.187915
AT1G08830	copper/zinc superoxide dismutase 1	1	chr1	2827061	2829315	10.9088	10.9301	10.6907	10.7856	10.9078	10.8498	10.8702	10.8887	10.9558	10.8432	10.8477	10.9049	0.00451833	0.960803	0.579557	0.0616548	0.511934	0.413975
AT1G08840	DNA replication helicase, putative	0	chr1	2829105	2838469	6.22405	5.95175	6.07478	6.0624	6.06107	5.88853	6.07512	5.63929	5.74107	6.08353	6.004	5.8185	-0.0795268	0.464873	0.424863	-0.265033	0.174872	0.2767
AT1G08845	Ribosomal L18p/L5e family protein	1	chr1	2838789	2840994	8.73135	8.73362	8.91283	8.7701	8.94118	8.92337	8.68756	8.9009	8.94118	8.7926	8.87822	8.84321	0.0856211	0.350731	0.378172	0.0506131	0.637957	0.45619
AT1G08860	Calcium-dependent phospholipid-binding Copine family protein	1	chr1	2842153	2846138	5.43687	5.41175	5.35559	5.67997	5.25194	5.27922	5.15132	4.91415	5.36322	5.4014	5.40371	5.1429	0.00230268	0.98833	0.586521	-0.258508	0.180859	0.27919
AT1G08880	Histone superfamily protein	0	chr1	2846949	2847800	13.1401	13.1097	13.2065	13.139	13.1852	13.215	13.1815	13.1774	13.074	13.1521	13.1797	13.1443	0.0276153	0.489718	0.434233	-0.00779912	0.872103	0.525278
AT1G08890	Major facilitator superfamily protein	1	chr1	2848348	2852270	8.43576	8.5098	8.33534	8.44909	8.49107	8.578	8.53685	8.58091	8.70872	8.42696	8.50606	8.60883	0.0790923	0.283965	0.348052	0.181866	0.0654454	0.216255
AT1G08900	Major facilitator superfamily protein	1	chr1	2852454	2855779	8.24318	8.06988	8.04919	8.45697	8.55628	8.56824	8.3067	8.30418	8.45383	8.12075	8.52716	8.3549	0.406415	0.0089185	0.128308	0.234154	0.0436814	0.20106
AT1G08910	zinc ion binding;zinc ion binding	1	chr1	2856227	2861170	6.58499	6.61726	6.73274	6.87823	6.75233	6.93758	6.9002	6.73531	7.05684	6.64499	6.85605	6.89745	0.211052	0.0424312	0.190178	0.252456	0.0951658	0.233759
AT1G08920	ERD (early response to dehydration) six-like 1	1	chr1	2867259	2870656	12.5601	12.4517	12.1707	12.5536	12.4822	12.4658	12.7584	12.7643	12.874	12.3942	12.5005	12.7989	0.106375	0.458071	0.422086	0.40477	0.0616242	0.21364
AT1G08930	Major facilitator superfamily protein	1	chr1	2873465	2877270	13.4927	13.5527	13.0867	13.5838	13.5353	13.6053	13.4443	13.5284	13.6796	13.3774	13.5748	13.5508	0.197468	0.308939	0.359743	0.173409	0.366083	0.360288
AT1G08940	Phosphoglycerate mutase family protein	1	chr1	2877692	2879169	10.4345	10.3228	10.068	10.2656	10.3957	10.3217	10.3244	10.2561	10.2889	10.2751	10.3277	10.2898	0.0525585	0.684253	0.501326	0.0147142	0.90536	0.534463
AT1G08960	cation exchanger 11	1	chr1	2879642	2882231	9.064	9.2354	9.33323	9.22198	9.01773	9.24111	9.19183	9.23049	9.09597	9.21088	9.16027	9.17276	-0.0506031	0.659109	0.49312	-0.0381134	0.695298	0.474428
AT1G08970	nuclear factor Y, subunit C9	1	chr1	2882524	2884337	11.4202	11.3764	11.5008	11.4216	11.3108	11.3842	11.4369	11.5312	11.603	11.4325	11.3722	11.5237	-0.060231	0.285827	0.34882	0.0912275	0.210035	0.293663
AT1G08980	amidase 1	1	chr1	2884411	2886620	8.88918	8.70644	8.81519	9.06761	9.13825	8.9373	9.0209	9.07687	9.1574	8.8036	9.04772	9.08505	0.244115	0.0374422	0.184171	0.281449	0.0155155	0.174971
AT1G08985	AP2/B3-like transcriptional factor family protein	1	chr1	2887285	2887706	5.33736	5.11209	4.89705	5.14853	5.20279	5.03045	5.29792	5.55106	5.23844	5.1155	5.12726	5.36247	0.0117542	0.937708	0.573691	0.246972	0.201055	0.289831
AT1G08990	plant glycogenin-like starch initiation protein 5	1	chr1	2888753	2890959	9.20043	9.15538	8.97212	9.25705	9.24433	9.12066	9.19684	9.23011	9.42188	9.10931	9.20735	9.28295	0.0980375	0.31087	0.36066	0.173638	0.154168	0.265634
AT1G09000	NPK1-related protein kinase 1	1	chr1	2891037	2895182	9.69966	9.72141	9.72265	9.682	9.68522	9.68889	9.76552	9.70183	9.56096	9.71457	9.68537	9.6761	-0.0292035	0.0513713	0.201066	-0.0384716	0.590435	0.439617
AT1G09010	glycoside hydrolase family 2 protein	0	chr1	2895166	2899384	9.20511	9.37145	9.42906	9.39471	9.42532	9.43905	9.42264	9.46165	9.20924	9.3352	9.41969	9.36451	0.0844878	0.334592	0.371416	0.0293084	0.790935	0.502275
AT1G09020	homolog of yeast sucrose nonfermenting 4	0	chr1	2899914	2904815	9.87208	10.017	9.98726	9.8485	9.77751	9.76653	9.85037	9.98191	9.94094	9.95879	9.79751	9.92441	-0.161282	0.046498	0.195393	-0.0343857	0.590894	0.439738
AT1G09026		1	chr1	2907124	2907279	4.86336	4.74571	4.58883	4.93747	4.70256	5.15695	4.32254	4.86169	4.80591	4.73263	4.93233	4.66338	0.199697	0.276571	0.344469	-0.0692494	0.739451	0.487942
AT_1_-_1_2908100-2908198		0	chr1	2908097	2908195	5.95963	6.18801	6.29617	6.03179	6.07847	5.69417	5.85913	5.91771	5.88692	6.14794	5.93481	5.88792	-0.213127	0.247516	0.329291	-0.26002	0.116038	0.243868
AT1G09030	nuclear factor Y, subunit B4	0	chr1	2908611	2909030	5.69531	5.56534	5.61095	5.45097	5.40763	5.63953	5.57797	5.75865	5.4177	5.62386	5.49938	5.58477	-0.124488	0.219042	0.315025	-0.0390896	0.739427	0.487942
AT_1_-_1_2910689-2910796		0	chr1	2910686	2910793	5.00619	4.85971	4.78347	4.996	5.27152	5.07592	4.79332	5.10366	5.14553	4.88312	5.11448	5.01417	0.231356	0.0950367	0.238718	0.131047	0.379133	0.365908
AT1G09040		1	chr1	2911317	2915369	8.04857	8.05144	8.08268	7.95155	8.00501	7.97742	7.90361	7.96199	7.84063	8.0609	7.97799	7.90208	-0.0829037	0.0149127	0.145309	-0.158818	0.0357645	0.194774
AT1G09050		1	chr1	2918031	2920889	8.39152	8.46651	8.50101	8.44298	8.34892	8.4166	8.32259	8.32246	8.2128	8.45301	8.40283	8.28595	-0.0501791	0.307007	0.35872	-0.167064	0.0273506	0.187915
AT1G09060	Zinc finger, RING-type;Transcription factor jumonji/aspartyl beta-hydroxylase	0	chr1	2921064	2925762	9.28784	9.29394	9.29654	9.18789	9.20139	9.22453	9.23684	9.16173	9.314	9.29277	9.2046	9.23752	-0.0881694	0.0109612	0.136718	-0.0552486	0.335606	0.347336
AT1G09070	soybean gene regulated by cold-2	1	chr1	2927703	2928968	9.05275	9.09663	8.86716	8.96795	9.07384	8.98204	9.3643	9.42625	9.5014	9.00551	9.00794	9.43065	0.00243029	0.977129	0.583726	0.425136	0.0117484	0.171323
AT1G09080	Heat shock protein 70 (Hsp 70) family protein	0	chr1	2929217	2931841	5.69253	6.14653	4.92922	5.64419	5.72297	5.80513	4.92808	4.98335	4.82381	5.58942	5.7241	4.91175	0.134672	0.74201	0.51934	-0.677675	0.1948	0.287292
AT1G09090	respiratory burst oxidase homolog B	1	chr1	2932739	2936586	9.09684	8.98786	8.81374	9.29153	9.23393	9.15998	8.77033	8.77033	8.95028	8.96615	9.22848	8.83031	0.262331	0.0680544	0.216858	-0.135835	0.259773	0.316466
AT1G09100	26S proteasome AAA-ATPase subunit RPT5B	0	chr1	2936528	2939326	9.83363	9.83048	9.82591	9.92682	9.99457	9.93408	9.91294	9.97444	10.0334	9.83001	9.95182	9.9736	0.121816	0.028589	0.170955	0.143591	0.0534177	0.207206
AT1G09130	ATP-dependent caseinolytic (Clp) protease/crotonase family protein	0	chr1	2939570	2942288	11.4502	11.4112	11.4596	11.5298	11.4461	11.4558	11.5639	11.5015	11.6048	11.4403	11.4772	11.5567	0.0369076	0.306406	0.358545	0.116429	0.0418459	0.199669
AT1G09140	SERINE-ARGININE PROTEIN 30	0	chr1	2942564	2945961	11.157	10.9807	11.0258	11.3768	11.2647	11.3403	11.0352	11.0539	10.9102	11.0545	11.3273	10.9998	0.272816	0.0174849	0.151311	-0.0547155	0.476185	0.400744
AT1G09150	pseudouridine synthase and archaeosine transglycosylase (PUA) domain-containing protein	1	chr1	2946229	2949159	9.86675	9.86393	9.98063	9.7272	9.78826	9.81579	9.87053	9.8819	9.91011	9.90377	9.77709	9.88751	-0.126684	0.0605283	0.210355	-0.0162562	0.719541	0.481649
AT1G09155	phloem protein 2-B15	0	chr1	2949676	2950989	9.57482	9.53082	9.33828	9.60675	9.75188	9.71401	9.43045	9.50315	9.53923	9.48131	9.69088	9.49095	0.209573	0.0826023	0.229161	0.00963807	0.911669	0.53599
AT1G09157	Protein of unknown function (DUF679)	0	chr1	2951665	2952396	5.47896	5.51183	5.5181	5.67347	5.30621	5.37971	5.31932	5.22475	5.35047	5.50296	5.45313	5.29818	-0.0498358	0.701052	0.506466	-0.204782	0.0237576	0.185861
AT1G09160	Protein phosphatase 2C family protein	0	chr1	2952771	2955689	9.65354	9.68414	9.81444	9.62153	9.49146	9.50581	9.51878	9.65354	9.57482	9.71738	9.5396	9.58238	-0.177777	0.0523077	0.202186	-0.134996	0.102135	0.23699
AT1G09170	P-loop nucleoside triphosphate hydrolases superfamily protein with CH (Calponin Homology) domain	0	chr1	2956589	2962207	7.93607	7.98225	7.65962	7.74356	7.44259	7.6567	8.13452	8.19121	7.98264	7.85931	7.61428	8.10279	-0.24503	0.144047	0.273578	0.243478	0.122837	0.247839
AT1G09176		1	chr1	2964152	2964604	7.91806	7.84618	7.09808	7.4008	7.33034	7.27893	7.58008	7.70576	7.68847	7.62077	7.33669	7.6581	-0.284086	0.39187	0.395615	0.0373316	0.900421	0.533228
AT1G09180	secretion-associated RAS super family 1	1	chr1	2965023	2965972	5.839	6.10859	5.71056	6.25888	6.03601	6.05524	6.04139	6.0145	6.3589	5.88605	6.11671	6.13826	0.230663	0.183083	0.295995	0.252215	0.19297	0.286457
AT1G09190	Tetratricopeptide repeat (TPR)-like superfamily protein	0	chr1	2966120	2967718	7.2205	7.62703	7.6842	7.6173	7.37774	7.53947	7.48196	7.70448	7.38362	7.51058	7.5115	7.52335	0.000924944	0.995819	0.588193	0.0127758	0.945577	0.545164
AT1G09195		0	chr1	2967940	2971498	5.63913	5.75969	5.62904	5.80252	5.99352	5.9191	6.01018	5.8077	5.51103	5.67595	5.90505	5.7763	0.229094	0.0336444	0.179295	0.10035	0.565767	0.432004
AT1G09200	Histone superfamily protein	0	chr1	2971593	2972199	12.6064	12.7643	12.8338	12.3155	12.3012	12.4608	12.5067	12.5381	12.393	12.7348	12.3592	12.4792	-0.375693	0.0131893	0.141646	-0.255594	0.0413693	0.199669
AT1G09210	calreticulin 1b	0	chr1	2972842	2976750	8.66965	8.761	8.72727	8.62816	8.7615	8.72752	8.8635	8.89885	8.76822	8.71931	8.70572	8.84352	-0.0135808	0.793552	0.534768	0.124215	0.0661605	0.217037
AT1G09220	Pentatricopeptide repeat (PPR) superfamily protein	0	chr1	2977792	2979466	5.69096	6.03361	5.88196	5.76038	5.69688	5.79634	5.1192	5.79057	5.65705	5.86884	5.7512	5.52227	-0.117641	0.357843	0.381221	-0.346568	0.229145	0.302343
AT1G09230	RNA-binding (RRM/RBD/RNP motifs) family protein	0	chr1	2979520	2982624	8.57571	8.65055	8.59444	8.68338	8.56297	8.72952	8.62412	8.70644	8.46885	8.6069	8.65863	8.59981	0.0517241	0.417419	0.405568	-0.00709642	0.930237	0.54106
AT1G09240	nicotianamine synthase 3	1	chr1	2984881	2986130	5.5691	4.75693	4.911	4.75094	4.95461	5.08757	5.07494	4.74837	4.90692	5.07901	4.93104	4.91007	-0.147973	0.624164	0.481681	-0.16894	0.577877	0.435708
AT1G09245	Plant self-incompatibility protein S1 family	0	chr1	2986939	2987393	5.29336	5.01217	5.04665	5.53342	5.21413	5.07741	5.29622	5.12507	5.03007	5.11739	5.27499	5.15045	0.157597	0.392595	0.395899	0.0330614	0.793306	0.502778
AT1G09250	basic helix-loop-helix (bHLH) DNA-binding superfamily protein	1	chr1	2989378	2990357	10.3573	10.3905	10.402	10.3972	10.4097	10.506	10.3552	10.4521	10.2729	10.3833	10.4376	10.3601	0.0543345	0.250758	0.331194	-0.0232149	0.702203	0.476759
AT_1_+_0_2991721-2991819		1	chr1	2991719	2991817	5.57631	5.50114	5.60669	5.49091	5.67649	5.25803	5.69742	5.51039	5.14017	5.56138	5.47514	5.44933	-0.0862345	0.554278	0.458006	-0.112053	0.566581	0.43234
AT_1_+_2_2992122-2992259		1	chr1	2992120	2992257	5.31836	5.2129	5.12437	4.9787	5.11073	5.25552	5.13801	5.20355	5.36103	5.21854	5.11499	5.2342	-0.103557	0.35506	0.379985	0.0156547	0.865774	0.523449
AT1G09260	Chaperone DnaJ-domain superfamily protein	1	chr1	2993404	2993820	4.9571	4.8603	4.76061	5.00154	4.75775	4.84452	5.11959	5.02474	4.81701	4.85934	4.86793	4.98711	0.00859421	0.929631	0.571575	0.127775	0.304826	0.335354
AT1G09270	importin alpha isoform 4	1	chr1	2994369	2998222	11.3714	11.5037	11.4293	11.341	11.3772	11.297	11.4144	11.4064	11.1921	11.4348	11.3384	11.3376	-0.0964201	0.112194	0.251593	-0.0971743	0.321903	0.342029
AT1G09280		0	chr1	2998100	3001315	10.2104	10.2719	10.5234	10.5972	10.5172	10.6478	10.3985	10.3979	10.2977	10.3352	10.5874	10.3647	0.252165	0.104407	0.246486	0.0294978	0.793758	0.502803
AT1G09290		0	chr1	3001517	3003762	9.10418	9.18463	9.20881	9.18559	9.13061	9.13274	9.11294	9.05826	9.03704	9.16587	9.14965	9.06941	-0.016227	0.6843	0.501326	-0.0964624	0.0747054	0.221183
AT1G09300	Metallopeptidase M24 family protein	1	chr1	3003495	3008213	9.28298	9.49376	9.54396	9.62274	9.63113	9.65025	9.60643	9.58575	9.62709	9.44023	9.63471	9.60642	0.194472	0.134093	0.267208	0.166189	0.170655	0.274474
AT1G09310	Protein of unknown function, DUF538	1	chr1	3009055	3009880	6.72939	7.78133	6.87237	7.0838	6.82727	7.13368	7.31445	7.16268	6.98538	7.1277	7.01492	7.15417	-0.112778	0.76944	0.528157	0.0264719	0.944585	0.544945
AT1G09320	agenet domain-containing protein	0	chr1	3009941	3012363	4.94489	5.33169	4.86508	4.85457	4.51513	5.08829	4.74169	4.88065	4.69305	5.04722	4.81933	4.7718	-0.227891	0.360096	0.382108	-0.275423	0.187124	0.283082
AT1G09330		0	chr1	3012762	3015091	11.5463	11.5925	11.5418	11.5633	11.56	11.6324	11.519	11.536	11.3679	11.5602	11.5853	11.4743	0.0250568	0.436547	0.413695	-0.0858804	0.244782	0.309289
AT1G09340	chloroplast RNA binding	1	chr1	3015328	3018234	6.23238	6.03436	6.31448	6.34352	6.11785	6.29958	6.31836	6.63993	6.43738	6.19374	6.25365	6.46522	0.0599136	0.609845	0.477152	0.271486	0.0973391	0.234631
AT1G09350	galactinol synthase 3	1	chr1	3019819	3021441	7.23595	7.20539	7.83639	7.55648	7.56931	7.53843	8.26873	8.13007	8.23455	7.42591	7.55474	8.21112	0.128833	0.594726	0.471846	0.785207	0.0569532	0.210109
AT1G09360	Plant invertase/pectin methylesterase inhibitor superfamily protein	1	chr1	3021802	3022368	5.37941	5.00756	5.46757	5.1416	4.94616	5.22246	5.3484	5.18371	5.18896	5.28485	5.1034	5.24036	-0.181444	0.342094	0.374697	-0.0444911	0.790333	0.502088
AT1G09370	Plant invertase/pectin methylesterase inhibitor superfamily protein	1	chr1	3024896	3025435	5.43271	5.92957	5.31404	5.87134	5.4682	5.85009	5.75791	5.53487	5.59071	5.55877	5.72988	5.62783	0.171102	0.502191	0.439562	0.0690582	0.756962	0.493033
AT1G09380	nodulin MtN21 /EamA-like transporter family protein	0	chr1	3026135	3029549	5.75941	6.02484	5.73257	6.63986	6.73506	6.76303	6.77917	6.57295	6.94656	5.83894	6.71265	6.76622	0.873707	0.00527069	0.11453	0.927283	0.00311451	0.130924
AT1G09390	GDSL-like Lipase/Acylhydrolase superfamily protein	1	chr1	3031203	3033582	7.74373	7.7643	7.94471	7.87921	7.82263	7.78266	7.64926	8.01564	7.59885	7.81758	7.82816	7.75458	0.0105867	0.889772	0.561738	-0.0629988	0.69627	0.474639
AT1G09400	FMN-linked oxidoreductases superfamily protein	0	chr1	3033512	3035036	5.86275	5.98508	5.79362	5.97483	5.99287	5.9892	5.86293	5.761	5.92477	5.88049	5.98564	5.84957	0.105151	0.200085	0.305116	-0.0309198	0.696404	0.474696
AT1G09410	pentatricopeptide (PPR) repeat-containing protein	1	chr1	3035443	3037560	6.32618	6.24627	6.27573	6.10794	6.09809	6.31645	6.32795	6.08019	6.15661	6.28273	6.17416	6.18825	-0.108568	0.263272	0.338125	-0.0944764	0.325825	0.343324
AT1G09415	NIM1-interacting 3	0	chr1	3037754	3038408	7.93774	7.99323	8.06919	8.27747	8.28659	8.2039	8.03341	7.99602	8.00472	8.00005	8.25599	8.01138	0.255933	0.00736773	0.122444	0.0113271	0.798824	0.504312
AT1G09420	glucose-6-phosphate dehydrogenase 4	0	chr1	3038462	3041873	7.48708	7.71416	7.67956	7.62062	7.80834	7.57653	7.79413	7.53928	7.57507	7.62693	7.6685	7.63616	0.0415664	0.699552	0.505994	0.00922482	0.935172	0.542319
AT1G09421	other RNA	1	chr1	3038631	3039326	6.50767	6.46985	6.58765	6.51185	6.3706	6.47568	6.14133	6.51202	6.32478	6.52172	6.45271	6.32604	-0.0690118	0.278646	0.345446	-0.19568	0.202004	0.290238
AT1G09430	ATP-citrate lyase A-3	1	chr1	3041996	3045402	10.9446	11.1067	11.0157	11.083	11.0989	11.0476	11.0996	11.0693	11.1411	11.0223	11.0765	11.1033	0.0541726	0.36928	0.385823	0.0810141	0.220356	0.298377
AT1G09440	Protein kinase superfamily protein	0	chr1	3045513	3047893	8.12974	8.19904	8.506	8.28415	8.23582	8.24017	7.97076	8.21677	8.11492	8.27826	8.25338	8.10082	-0.0248835	0.850233	0.550882	-0.177444	0.274428	0.32282
AT1G09450	Protein kinase superfamily protein	1	chr1	3049024	3053112	6.84413	7.13216	7.04133	6.95656	6.75684	6.96651	7.00916	6.9024	6.97965	7.00587	6.89331	6.96374	-0.112567	0.362772	0.383415	-0.0421356	0.679224	0.469498
AT1G09460	Carbohydrate-binding X8 domain superfamily protein	1	chr1	3053901	3055360	8.30365	8.51317	8.48305	8.75971	8.79071	8.81065	8.79647	8.66812	8.71518	8.43329	8.78702	8.72659	0.353733	0.0275827	0.169373	0.2933	0.0269954	0.187915
AT1G09470		0	chr1	3055231	3057443	6.90701	7.02614	7.04168	7.21308	6.98186	6.87987	7.03619	7.02039	7.03357	6.99161	7.02494	7.03005	0.0333281	0.778476	0.530567	0.0384412	0.461948	0.395601
AT1G09480	NAD(P)-binding Rossmann-fold superfamily protein	1	chr1	3057975	3060661	7.96541	7.9917	7.89988	7.95866	8.1575	8.10227	8.31912	8.44065	8.56091	7.95233	8.07281	8.44023	0.120478	0.168098	0.288055	0.487898	0.0112813	0.170524
AT1G09483		0	chr1	3060992	3061729	5.77719	5.90957	5.80971	5.63351	5.56881	5.43757	5.67256	5.34086	5.61198	5.83215	5.54663	5.5418	-0.285527	0.0191831	0.154932	-0.290354	0.0895307	0.230561
AT1G09486		0	chr1	3062430	3063731	14.7853	14.868	15.084	14.8369	14.7203	14.9352	14.8525	14.9769	14.6206	14.9124	14.8308	14.8166	-0.0816003	0.498691	0.438029	-0.095779	0.5245	0.41886
AT1G09490	NAD(P)-binding Rossmann-fold superfamily protein	1	chr1	3064124	3065937	8.0894	7.98241	8.01579	8.14873	8.12934	8.01237	8.12489	8.83768	8.32709	8.0292	8.09682	8.42989	0.0676167	0.276698	0.344533	0.400687	0.197201	0.288464
AT1G09500	NAD(P)-binding Rossmann-fold superfamily protein	1	chr1	3066699	3068598	5.3505	5.39312	5.74606	5.26643	5.39451	5.61605	5.40418	5.02562	5.36684	5.49656	5.42566	5.26555	-0.070901	0.68454	0.501335	-0.231014	0.254735	0.314092
AT1G09510	NAD(P)-binding Rossmann-fold superfamily protein	1	chr1	3069385	3070910	4.42472	4.64009	4.62188	4.57534	4.6505	4.82868	4.85474	4.54494	4.60846	4.56223	4.68484	4.66938	0.122613	0.295957	0.35306	0.10715	0.415911	0.3796
AT1G09520		0	chr1	3070946	3072050	9.44984	9.44943	9.52508	9.82323	9.81787	9.69348	9.5986	9.66852	9.76318	9.47478	9.77819	9.67677	0.303412	0.00678089	0.122113	0.201987	0.0325882	0.192301
AT1G09530	phytochrome interacting factor 3	1	chr1	3076582	3079539	5.93133	6.42859	6.24627	6.01815	6.14366	6.10492	6.32053	6.48927	6.40305	6.20206	6.08891	6.40428	-0.113149	0.521139	0.446003	0.202223	0.296821	0.331945
AT_1_+_1_3083825-3084061		1	chr1	3083823	3084059	5.68247	5.48766	5.5157	5.6247	5.3121	5.32301	5.48662	5.36153	5.23424	5.56194	5.41993	5.3608	-0.142011	0.312827	0.361412	-0.201148	0.103584	0.238214
AT1G09540	myb domain protein 61	1	chr1	3086159	3087912	9.05148	9.10442	8.90673	8.80719	8.84533	8.90658	9.073	8.93389	8.95988	9.02088	8.85303	8.98892	-0.167845	0.0865061	0.231828	-0.0319567	0.68586	0.471404
AT1G09550	Pectinacetylesterase family protein	0	chr1	3089733	3092327	5.78243	5.90856	5.93934	5.85532	5.70655	6.08319	6.07282	5.91566	6.00011	5.87678	5.88169	5.9962	0.00490851	0.970062	0.581896	0.11942	0.14524	0.260833
AT_1_-_0_3093276-3093530		0	chr1	3093274	3093528	4.422	4.64953	4.6598	4.40672	4.77547	4.43341	4.85251	4.50907	4.61813	4.57711	4.53854	4.65991	-0.0385735	0.801155	0.536834	0.0827969	0.554124	0.428188
AT1G09560	germin-like protein 5	1	chr1	3093839	3094864	13.0473	13.0171	13.06	12.998	12.9929	13.0397	13.1799	13.2679	13.3015	13.0415	13.0102	13.2498	-0.031308	0.185938	0.297369	0.208253	0.0197138	0.181495
AT1G09570	phytochrome A	0	chr1	3095256	3100357	8.26011	8.35867	8.42395	8.02789	8.21397	8.12349	8.12141	7.98585	7.89917	8.34758	8.12179	8.00214	-0.225789	0.0353652	0.181502	-0.345433	0.0151531	0.174273
AT1G09575	Protein of unknown function (DUF607)	0	chr1	3101671	3102925	7.00824	7.11925	7.0606	6.98962	7.12434	8.19871	7.05305	7.32474	7.19361	7.06269	7.43756	7.19047	0.374865	0.430592	0.411144	0.127775	0.240222	0.307427
AT1G09580	emp24/gp25L/p24 family/GOLD family protein	1	chr1	3104588	3106290	9.99697	10.1597	10.159	10.0465	9.99751	10.079	10.1048	10.1211	9.64375	10.1052	10.041	9.95657	-0.0642109	0.363308	0.383667	-0.148629	0.448088	0.391094
AT1G09590	Translation protein SH3-like family protein	1	chr1	3106502	3107772	14.7892	14.9591	15.0751	14.5848	14.6481	14.7608	14.7338	14.9016	14.7383	14.9411	14.6646	14.7912	-0.276579	0.0583567	0.20853	-0.149912	0.217441	0.297002
AT1G09600	Protein kinase superfamily protein	1	chr1	3108617	3111318	7.01866	7.36491	7.26614	6.92262	6.98265	6.74724	7.03191	7.29841	7.05441	7.21657	6.88417	7.12825	-0.332401	0.0639499	0.213202	-0.0883257	0.546242	0.425418
AT1G09610	Protein of unknown function (DUF579)	1	chr1	3111694	3112873	5.76551	6.08261	5.77329	5.91454	5.65103	5.79476	5.66011	6.00235	5.97461	5.8738	5.78678	5.87902	-0.0870267	0.54089	0.453599	0.00521986	0.974168	0.552266
AT1G09620	ATP binding;leucine-tRNA ligases;aminoacyl-tRNA ligases;nucleotide binding;ATP binding;aminoacyl-tRNA ligases	0	chr1	3112778	3116699	8.08514	8.29936	8.42413	7.95818	7.83331	8.072	8.16044	8.27769	8.00492	8.26954	7.9545	8.14768	-0.315046	0.0665456	0.215567	-0.121858	0.392929	0.370983
AT1G09625		0	chr1	3117137	3117567	5.82544	5.86259	5.73928	5.6197	5.34095	6.0085	5.5398	5.80699	5.54539	5.8091	5.65638	5.63073	-0.152722	0.514579	0.444143	-0.178376	0.169706	0.273801
AT1G09630	RAB GTPase 11C	0	chr1	3118203	3119708	11.3586	11.4097	11.4118	11.2223	11.2271	11.2725	11.401	11.4073	11.1364	11.3933	11.2406	11.3149	-0.152691	0.00302986	0.104385	-0.0784218	0.473913	0.399843
AT1G09640	Translation elongation factor EF1B, gamma chain	1	chr1	3119878	3122526	14.9016	15.1098	15.2138	15.1159	14.9896	15.1562	14.9591	15.15	14.868	15.0751	15.0873	14.9924	0.012177	0.914479	0.567947	-0.0827299	0.540924	0.423808
AT1G09645		1	chr1	3122956	3124578	10.4305	10.3157	10.256	10.5905	10.4979	10.5552	10.3893	10.4784	10.3671	10.334	10.5479	10.4116	0.213813	0.0338078	0.179295	0.0775368	0.285179	0.327479
AT1G09650	F-box and associated interaction domains-containing protein	1	chr1	3125807	3127284	5.49526	5.56446	5.69783	5.27567	5.1292	4.97116	6.12992	4.95657	5.36257	5.58585	5.12534	5.48302	-0.460509	0.0162493	0.14854	-0.102832	0.794711	0.503155
AT1G09660	RNA-binding KH domain-containing protein	0	chr1	3127771	3131094	10.2026	10.2191	10.2697	10.1245	10.1501	10.2269	10.0254	9.99457	9.71609	10.2305	10.1672	9.91201	-0.0633322	0.171493	0.289478	-0.318474	0.0780526	0.223107
AT_1_+_1_3132632-3132793		1	chr1	3132630	3132791	6.17356	6.07873	6.15296	5.81506	6.12127	6.24325	6.04671	5.58331	5.71872	6.13509	6.05986	5.78291	-0.0752253	0.617963	0.479669	-0.352172	0.119132	0.245612
AT1G09665	Toll-Interleukin-Resistance (TIR) domain family protein	1	chr1	3133095	3133674	5.17387	5.27709	5.23536	5.21495	5.52931	5.39679	5.47931	5.90758	5.07682	5.22877	5.38035	5.4879	0.151579	0.232832	0.321825	0.259127	0.393011	0.37101
AT1G09680	Pentatricopeptide repeat (PPR) superfamily protein	0	chr1	3134107	3135930	6.40957	6.43004	6.56288	6.54039	6.27835	6.2874	6.26133	6.40808	6.39171	6.4675	6.36871	6.35371	-0.0987819	0.386434	0.393408	-0.113787	0.16389	0.271574
AT1G09690	Translation protein SH3-like family protein	0	chr1	3136188	3137475	15.2922	15.5234	15.6464	15.2498	15.2077	15.4345	15.4231	15.5419	15.2442	15.4873	15.2973	15.403	-0.189974	0.213124	0.311702	-0.0842772	0.567687	0.432588
AT1G09700	dsRNA-binding domain-like superfamily protein	0	chr1	3137767	3140353	9.27189	9.47242	9.66761	9.40654	9.33243	9.48482	9.26422	9.24698	9.18354	9.47064	9.40793	9.23158	-0.0627117	0.649024	0.490086	-0.239063	0.166532	0.272292
AT1G09710	Homeodomain-like superfamily protein	1	chr1	3140868	3144370	8.25035	8.25836	8.44425	8.41202	8.35403	8.50085	8.33335	8.2554	8.47569	8.31765	8.4223	8.35481	0.104646	0.251851	0.331777	0.0371607	0.702081	0.476724
AT1G09720	Kinase interacting (KIP1-like) family protein	0	chr1	3144438	3147303	6.34569	5.85335	5.99055	5.66125	5.60826	5.91819	5.90353	5.68203	5.83914	6.0632	5.72924	5.80823	-0.333963	0.140722	0.271614	-0.254966	0.218232	0.297316
AT1G09730	Cysteine proteinases superfamily protein	0	chr1	3147667	3154380	7.61634	7.77372	7.80743	7.71914	7.63388	7.68509	7.74983	7.68721	7.85898	7.7325	7.67937	7.76534	-0.0531271	0.473057	0.427649	0.0328426	0.69357	0.473782
AT1G09740	Adenine nucleotide alpha hydrolases-like superfamily protein	1	chr1	3154532	3156275	13.1442	12.974	12.8077	13.3096	13.3992	13.3598	13.2346	13.2504	13.3992	12.9753	13.3562	13.2947	0.380955	0.0511053	0.200866	0.319457	0.0609967	0.213485
AT1G09750	Eukaryotic aspartyl protease family protein	1	chr1	3157501	3159148	10.7317	10.9274	10.8587	10.6863	10.6405	10.8109	10.8049	10.8059	10.4105	10.8393	10.7126	10.6738	-0.126721	0.174702	0.29104	-0.165515	0.339726	0.349392
AT1G09760	U2 small nuclear ribonucleoprotein A	0	chr1	3159125	3161692	10.854	11.0036	11.195	10.9075	10.9263	10.9769	10.8747	10.8752	10.797	11.0175	10.9369	10.849	-0.0805923	0.502054	0.439506	-0.168522	0.225228	0.300576
AT1G09770	cell division cycle 5	1	chr1	3161841	3165360	9.81012	9.77796	9.96438	9.78031	9.74205	9.81483	9.65713	9.73067	9.67648	9.85082	9.77907	9.6881	-0.0717543	0.340066	0.373646	-0.162725	0.091108	0.231453
AT1G09780	Phosphoglycerate mutase, 2,3-bisphosphoglycerate-independent	0	chr1	3165370	3167869	11.9376	12.2575	12.214	11.7698	11.7799	11.8467	12.1749	12.1844	12.0682	12.1364	11.7988	12.1425	-0.337582	0.0706221	0.21937	0.00610959	0.958602	0.548166
AT1G09790	COBRA-like protein 6 precursor	0	chr1	3168482	3170819	4.90379	4.86671	4.92029	4.97283	5.11345	4.76943	4.94174	5.23197	5.07217	4.89693	4.95191	5.08196	0.0549725	0.638848	0.486669	0.185029	0.154116	0.265589
AT1G09794	Cox19 family protein (CHCH motif)	1	chr1	3172108	3173463	8.69908	8.51288	8.4771	8.57143	8.87025	8.70217	8.88236	8.88341	9.08262	8.56302	8.71462	8.94946	0.151595	0.245428	0.328075	0.386443	0.0156886	0.175275
AT1G09795	ATP phosphoribosyl transferase 2	1	chr1	3173534	3176910	8.04879	8.2823	8.55558	8.18016	8.03492	8.14873	8.34342	8.24843	8.13743	8.29555	8.12127	8.24309	-0.174281	0.356889	0.380726	-0.052461	0.764536	0.495386
AT1G09800	Pseudouridine synthase family protein	0	chr1	3176883	3180421	8.09512	8.16537	8.30281	8.00637	8.09727	7.9845	7.9547	7.99368	7.89765	8.18776	8.02938	7.94867	-0.158381	0.104393	0.246486	-0.23909	0.0420592	0.199669
AT1G09810	evolutionarily conserved C-terminal region 11	0	chr1	3180936	3184224	8.64912	8.83422	8.88377	8.80975	8.74099	8.94492	8.75774	8.65269	8.52672	8.78904	8.83189	8.64571	0.0428468	0.670278	0.497092	-0.143325	0.216834	0.296585
AT1G09812		1	chr1	3187817	3188580	7.09428	7.09775	7.06536	7.20822	7.12673	7.12503	7.02751	7.28159	7.3074	7.0858	7.15333	7.2055	0.0675332	0.12007	0.256841	0.119705	0.311595	0.338084
AT1G09815	polymerase delta 4	1	chr1	3189369	3190242	11.163	11.1812	11.1718	11.4448	11.5041	11.5117	11.4028	11.4282	11.4533	11.172	11.4868	11.4281	0.314841	0.00290583	0.103263	0.256111	0.00125909	0.108282
AT1G09820	Pentatricopeptide repeat (PPR-like) superfamily protein	0	chr1	3190288	3192414	6.87453	7.29741	7.30555	7.16621	7.02454	6.9891	7.07847	7.1684	7.08319	7.15916	7.05995	7.11002	-0.0992169	0.568248	0.462764	-0.0491435	0.765172	0.495491
AT1G09830	Glycinamide ribonucleotide (GAR) synthetase	0	chr1	3192681	3195025	8.55697	8.77059	8.81948	8.79297	8.58649	8.64133	8.73431	8.67746	8.47975	8.71568	8.6736	8.63051	-0.0420808	0.701175	0.506491	-0.0851747	0.487834	0.405059
AT1G09840	shaggy-like protein kinase 41	0	chr1	3195824	3200291	10.1632	10.198	10.3773	10.3571	10.3507	10.2855	10.2683	10.1412	10.1362	10.2462	10.3311	10.1819	0.0849601	0.329071	0.368837	-0.0642366	0.469537	0.398218
AT1G09850	xylem bark cysteine peptidase 3	1	chr1	3201799	3204150	8.417	8.54176	8.5356	8.50061	8.5204	8.55308	8.66269	8.72776	8.60238	8.49812	8.5247	8.66428	0.0265777	0.590274	0.470627	0.166157	0.0385102	0.197104
AT1G09860	purine permease 16	0	chr1	3204016	3205309	6.99551	7.04218	6.63495	6.92212	6.82504	6.73624	7.20539	7.24796	7.23372	6.89088	6.8278	7.22903	-0.0630802	0.685071	0.501357	0.338144	0.118076	0.24498
AT1G09870	histidine acid phosphatase family protein	1	chr1	3205741	3208598	9.62611	9.83768	9.88553	9.70934	9.48597	9.76496	9.649	9.61137	9.5777	9.7831	9.65343	9.61269	-0.129677	0.329059	0.368837	-0.170412	0.159135	0.268813
AT1G09880	Rhamnogalacturonate lyase family protein	0	chr1	3208828	3211653	5.73536	5.65422	6.26013	5.94977	5.63672	5.70527	5.81328	5.85709	6.08684	5.88324	5.76392	5.91907	-0.119317	0.614128	0.478665	0.0358323	0.875032	0.525968
AT1G09890	Rhamnogalacturonate lyase family protein	0	chr1	3214237	3217538	6.7952	6.87706	7.09854	7.15036	6.78842	6.89636	6.51805	6.69525	6.75433	6.9236	6.94505	6.65588	0.0214411	0.886232	0.560803	-0.267729	0.0843692	0.228007
AT1G09900	Pentatricopeptide repeat (PPR-like) superfamily protein	1	chr1	3218133	3219929	8.28482	8.42439	8.53919	8.43541	8.46831	8.44876	8.24938	8.36482	8.17022	8.41613	8.45082	8.26147	0.0346895	0.684665	0.501335	-0.154664	0.175437	0.276841
AT1G09910	Rhamnogalacturonate lyase family protein	0	chr1	3220035	3224541	10.1892	10.2868	10.3063	10.2141	10.3236	10.2828	10.046	10.1483	10.1377	10.2608	10.2735	10.1107	0.0127339	0.805282	0.538146	-0.150128	0.0373221	0.196362
AT1G09920	TRAF-type zinc finger-related	0	chr1	3224684	3227070	11.9567	11.8636	11.8269	11.9038	11.8618	11.9769	12.056	12.0282	11.9124	11.8824	11.9141	11.9988	0.0317452	0.569654	0.46348	0.116445	0.118708	0.245344
AT1G09930	oligopeptide transporter 2	0	chr1	3227490	3230043	7.77727	7.61674	7.75648	7.72004	7.63086	7.82781	7.66716	7.44882	7.66287	7.71683	7.72624	7.59295	0.00940566	0.907613	0.566259	-0.123882	0.239637	0.307193
AT1G09932	Phosphoglycerate mutase family protein	0	chr1	3230450	3233109	8.11644	8.24393	8.29454	8.64596	8.58312	8.68493	8.44981	8.27554	7.95095	8.2183	8.638	8.22544	0.419698	0.00534126	0.11453	0.00713135	0.966805	0.550237
AT1G09935	Phosphoglycerate mutase family protein	0	chr1	3234060	3235530	6.19371	5.86196	6.18706	5.97502	6.00365	5.8854	5.81613	5.61408	5.68024	6.08091	5.95469	5.70349	-0.126221	0.370015	0.386147	-0.377426	0.0543429	0.208015
AT1G09940	Glutamyl-tRNA reductase family protein	0	chr1	3236995	3239554	9.14247	9.13825	9.05259	9.03428	9.00495	9.03197	9.24289	9.17291	9.26149	9.1111	9.02373	9.22576	-0.0873707	0.0847397	0.230392	0.114658	0.0453634	0.2017
AT1G09950	RESPONSE TO ABA AND SALT 1	0	chr1	3240606	3241632	5.4697	5.83977	5.6763	6.10948	5.81412	6.15946	6.12935	5.75232	6.03759	5.66192	6.02769	5.97309	0.365764	0.0737318	0.222028	0.311166	0.117148	0.244261
AT1G09960	sucrose transporter 4	1	chr1	3244213	3247200	9.72364	9.5911	9.98744	9.82918	9.82267	9.81033	9.98684	9.93453	9.71553	9.76739	9.82072	9.87896	0.0533339	0.692124	0.503844	0.111573	0.483398	0.403644
AT_1_+_0_3247873-3247965		1	chr1	3247871	3247963	6.4408	5.86312	6.38734	6.22523	6.16745	6.19884	6.13268	6.7682	6.12947	6.23042	6.19717	6.34345	-0.0332496	0.873724	0.557509	0.113029	0.708647	0.478703
AT1G09970	Leucine-rich receptor-like protein kinase family protein	1	chr1	3252240	3255693	13.1501	13.2595	13.111	13.3352	13.2622	13.3087	13.2369	13.2731	13.2811	13.1736	13.302	13.2637	0.128459	0.0835703	0.22984	0.090164	0.171642	0.274792
AT1G09980	Putative serine esterase family protein	0	chr1	3256245	3261614	6.20406	6.57526	6.4835	6.36387	6.62742	6.37611	6.55937	6.88134	6.4604	6.42094	6.4558	6.6337	0.034861	0.817455	0.541412	0.212765	0.277901	0.324318
AT1G09995	DNA repair DEAD helicase RAD3/XP-D subfamily protein	0	chr1	3262265	3263612	7.19658	7.29081	7.15649	7.44635	7.40489	7.40376	7.2224	7.12256	7.38575	7.21463	7.41833	7.24357	0.203705	0.0257181	0.166737	0.0289417	0.759742	0.493893
AT1G10000	Ribonuclease H-like superfamily protein	0	chr1	3263877	3264788	7.78067	7.60996	8.38165	7.80057	7.56976	7.77753	7.7794	8.53938	7.82966	7.92409	7.71595	8.04948	-0.20814	0.472576	0.427444	0.125388	0.730331	0.484905
AT1G10010	amino acid permease 8	1	chr1	3265976	3268726	5.10446	5.21766	4.55505	5.0417	4.73391	4.89583	4.75936	4.9944	5.18839	4.95906	4.89048	4.98071	-0.0685787	0.780493	0.530991	0.021659	0.933105	0.541841
AT1G10020	Protein of unknown function (DUF1005)	0	chr1	3269604	3271987	10.2673	10.3298	10.1746	10.21	10.3435	10.3504	10.3253	10.2962	10.1665	10.2572	10.3013	10.2627	0.0440768	0.530022	0.44932	0.00546447	0.938424	0.543343
AT1G10030	homolog of yeast ergosterol28	1	chr1	3273825	3275837	11.23	11.2365	11.2489	10.9577	11.0207	11.1331	11.1388	11.1801	10.824	11.2385	11.0371	11.0477	-0.201346	0.0576477	0.207725	-0.190821	0.231563	0.303217
AT1G10040	alpha/beta-Hydrolases superfamily protein	0	chr1	3275891	3278697	8.75565	8.76496	8.58122	8.89537	8.70299	8.81344	8.8147	8.74765	8.78504	8.70061	8.80393	8.78246	0.103323	0.275044	0.34362	0.0818541	0.302855	0.334542
AT1G10050	glycosyl hydrolase family 10 protein / carbohydrate-binding domain-containing protein	1	chr1	3279270	3283482	9.74506	9.86618	9.65794	9.73454	9.7272	9.83614	9.88333	9.84761	9.62888	9.7564	9.76596	9.78661	0.00956594	0.899224	0.564325	0.0302104	0.778355	0.498898
AT1G10060	branched-chain amino acid transaminase 1	1	chr1	3284239	3287107	5.0272	5.15248	4.78499	5.09505	4.94144	4.82503	4.77966	4.94252	4.75574	4.98823	4.95384	4.82597	-0.0343891	0.810208	0.539386	-0.162254	0.27573	0.323441
AT1G10070	branched-chain amino acid transaminase 2	1	chr1	3288087	3290471	6.46772	6.29865	6.36052	6.4517	6.32425	6.44828	6.47997	6.51781	6.38298	6.37563	6.40808	6.46025	0.0324481	0.643425	0.48832	0.0846223	0.257163	0.315383
AT1G10090	Early-responsive to dehydration stress protein (ERD4)	0	chr1	3290311	3296198	8.92208	9.01452	8.99819	9.06112	9.02559	8.99682	9.03746	9.10418	9.13909	8.97827	9.02784	9.09358	0.0495762	0.229717	0.320165	0.115312	0.0490959	0.204258
AT1G10095	Protein prenylyltransferase superfamily protein	0	chr1	3297324	3300443	7.17261	7.16919	7.14236	7.28367	7.3323	7.09936	7.0954	7.01576	7.23515	7.16139	7.23844	7.11544	0.0770544	0.390976	0.395371	-0.0459502	0.54919	0.426428
AT1G10100		0	chr1	3300697	3301489	6.5286	6.28001	6.1005	6.00713	5.80901	6.09579	6.21123	5.85898	6.37138	6.30304	5.97064	6.1472	-0.332396	0.100422	0.243297	-0.155843	0.472084	0.399141
AT_1_-_2_3302194-3302295		0	chr1	3302192	3302293	5.61982	5.67813	5.54634	5.77183	5.48381	5.41972	5.54916	5.17189	5.46011	5.61476	5.55845	5.39372	-0.0563141	0.663668	0.494783	-0.221044	0.183462	0.280868
AT1G10110	F-box family protein	1	chr1	3302742	3304092	6.7287	6.7008	6.3962	6.8009	6.48143	6.29992	6.70137	6.79847	7.01781	6.60857	6.52741	6.83921	-0.081154	0.679284	0.499991	0.230647	0.18026	0.278904
AT1G10120	basic helix-loop-helix (bHLH) DNA-binding superfamily protein	0	chr1	3304039	3306824	10.6727	10.8112	10.9098	10.5699	10.5161	10.6831	10.6222	10.4894	10.4355	10.7979	10.5897	10.5157	-0.208182	0.0761347	0.223516	-0.282168	0.0352224	0.194454
AT1G10130	endoplasmic reticulum-type calcium-transporting ATPase 3	1	chr1	3310930	3322213	9.84761	10.0982	10.0828	9.85318	9.71625	9.92022	9.81526	9.67218	9.61046	10.0095	9.82988	9.6993	-0.179631	0.155628	0.280425	-0.310217	0.0415189	0.199669
AT1G10140	Uncharacterised conserved protein UCP031279	0	chr1	3322802	3323548	12.1534	11.882	11.914	12.3547	12.3847	12.3	12.2373	12.3128	12.4424	11.9831	12.3465	12.3308	0.363326	0.0423627	0.190178	0.347689	0.0345056	0.19362
AT1G10150	Carbohydrate-binding protein	1	chr1	3325824	3327614	9.18108	9.10111	8.85872	9.38044	9.37125	9.38895	9.23147	9.3379	9.52173	9.04697	9.38021	9.3637	0.333242	0.0747638	0.222555	0.316729	0.0708189	0.218753
AT1G10155	phloem protein 2-A10	0	chr1	3327637	3328448	7.23071	7.25389	7.20346	7.60735	7.27939	7.41759	7.38515	7.7545	7.63824	7.22935	7.43478	7.59263	0.205423	0.160451	0.284098	0.363278	0.0769954	0.222449
AT1G10160	transposable element gene	1	chr1	3328971	3333470	8.48227	8.56512	8.62488	8.65818	8.5178	8.53692	8.50898	8.62497	8.62572	8.55742	8.57096	8.58656	0.0135418	0.833481	0.54585	0.0291339	0.634527	0.455064
AT1G10170	NF-X-like 1	0	chr1	3333595	3337491	8.87372	9.18899	9.07276	9.11611	9.09146	9.19522	9.59137	9.66352	9.5298	9.04516	9.13426	9.5949	0.0891081	0.440273	0.414718	0.54974	0.0157022	0.175275
AT1G10180		0	chr1	3338303	3341608	9.46921	9.53668	9.70506	9.43794	9.46773	9.47916	9.38803	9.35407	9.3309	9.57032	9.46161	9.35767	-0.108707	0.25938	0.335627	-0.21265	0.0865889	0.228922
AT1G10190	Protein of Unknown Function (DUF239)	0	chr1	3343686	3345632	5.25687	5.33248	5.09415	5.07726	5.06123	4.68849	5.22148	5.05812	4.97555	5.22783	4.94233	5.08505	-0.285506	0.140349	0.271458	-0.14278	0.229732	0.302461
AT1G10200	GATA type zinc finger transcription factor family protein	0	chr1	3346390	3347885	11.6848	11.6727	11.6842	11.6678	11.7514	11.6842	11.7054	11.7656	11.6357	11.6806	11.7012	11.7022	0.0206065	0.506093	0.440923	0.0216688	0.622705	0.450622
AT1G10210	mitogen-activated protein kinase 1	1	chr1	3349219	3351180	7.10167	7.10613	7.31933	7.48762	7.40787	7.37661	7.42558	7.36459	7.46008	7.17571	7.42403	7.41675	0.248326	0.056384	0.205995	0.241045	0.0634471	0.214796
AT1G10220		1	chr1	3352159	3354856	5.29114	5.08383	5.36525	5.29181	5.59251	5.50955	5.0158	5.81047	5.47724	5.24674	5.46462	5.43451	0.21788	0.151509	0.277283	0.187763	0.509134	0.412909
AT1G10230	SKP1-like 18	1	chr1	3355571	3356359	9.60811	9.71716	9.77504	9.65036	9.60023	9.85968	9.57522	9.62835	9.61385	9.7001	9.70342	9.60581	0.00332258	0.973628	0.582911	-0.0942934	0.186001	0.282319
AT1G10240	FAR1-related sequence 11	0	chr1	3356680	3359838	7.94813	8.11279	8.06401	8.16572	8.06625	8.14023	8.05323	8.05916	7.94886	8.04164	8.12407	8.02042	0.0824241	0.237192	0.324247	-0.0212265	0.74515	0.489572
AT1G10250		0	chr1	3360087	3360508	5.67445	5.61415	5.59897	5.60942	5.64958	5.73499	5.49751	5.61931	5.68044	5.62919	5.66467	5.59909	0.0354776	0.469824	0.426226	-0.0301027	0.645826	0.458599
AT1G10260	transposable element gene	0	chr1	3360526	3361247	5.03317	5.07316	5.21521	5.31422	5.17499	5.07808	5.16457	4.94674	4.77743	5.10718	5.1891	4.96291	0.0819166	0.406915	0.401394	-0.144267	0.333912	0.346809
AT1G10270	glutamine-rich protein 23	1	chr1	3363504	3366488	7.82034	8.05834	8.20045	7.81006	7.72064	7.90706	7.80005	7.95483	7.69747	8.02638	7.81259	7.81745	-0.213791	0.184621	0.296654	-0.208925	0.203092	0.290696
AT1G10280	Core-2/I-branching beta-1,6-N-acetylglucosaminyltransferase family protein	0	chr1	3366493	3369095	7.76871	7.89205	7.8903	7.68276	7.87619	7.8987	7.7018	7.79	7.70042	7.85036	7.81922	7.73074	-0.0311374	0.72042	0.512601	-0.119615	0.0829566	0.22708
AT1G10290	dynamin-like protein 6	1	chr1	3370558	3377463	10.1224	10.3586	10.3941	10.1717	10.1788	10.2241	10.2808	10.2523	9.99318	10.2917	10.1915	10.1754	-0.10019	0.360746	0.3824	-0.11627	0.405388	0.375886
AT1G10300	Nucleolar GTP-binding protein	1	chr1	3378142	3380226	5.88748	6.12503	5.97707	5.96574	5.75922	6.08846	5.64594	6.27568	5.81239	5.99652	5.93781	5.91134	-0.0587166	0.648489	0.48975	-0.0851874	0.704714	0.477568
AT1G10310	NAD(P)-binding Rossmann-fold superfamily protein	0	chr1	3381601	3383914	10.0205	10.0312	10.1717	10.159	10.0589	10.2333	10.1897	10.1259	10.0855	10.0744	10.1504	10.1337	0.0759388	0.340112	0.373651	0.0592198	0.370749	0.362357
AT1G10320	Zinc finger C-x8-C-x5-C-x3-H type family protein	0	chr1	3384164	3388373	9.43075	9.48162	9.50375	9.52819	9.42884	9.4751	9.54475	9.58019	9.43383	9.47204	9.47738	9.51959	0.00533578	0.889645	0.561702	0.0475514	0.406236	0.376194
AT1G10330	Tetratricopeptide repeat (TPR)-like superfamily protein	1	chr1	3388747	3390150	7.46087	7.59608	7.44941	7.44191	7.6434	7.45621	7.36059	7.40274	7.29299	7.50212	7.51384	7.35211	0.0117197	0.891531	0.562382	-0.150013	0.066002	0.216889
AT1G10340	Ankyrin repeat family protein	0	chr1	3390322	3392571	6.26951	6.31907	6.32638	6.28988	6.3654	6.42282	6.31516	6.28076	6.39573	6.30499	6.35936	6.33055	0.054375	0.295195	0.352768	0.0255607	0.553591	0.428057
AT1G10350	DNAJ heat shock family protein	0	chr1	3393407	3395055	9.51544	9.43805	9.47049	9.45934	9.56992	9.39191	9.53212	9.5272	9.64926	9.47466	9.47372	9.56952	-0.000936222	0.987925	0.58638	0.0948646	0.125557	0.249783
AT1G10360	glutathione S-transferase TAU 18	0	chr1	3395558	3396849	9.62511	9.29446	9.69258	9.27872	9.22913	8.99703	9.32399	9.3267	9.47684	9.53738	9.1683	9.37585	-0.369089	0.0774574	0.224649	-0.161539	0.321344	0.341992
AT1G10370	Glutathione S-transferase family protein	0	chr1	3397081	3398358	10.7666	10.8178	10.8971	9.87208	10.0264	9.94082	10.8723	10.9322	10.9912	10.8272	9.94643	10.9319	-0.880756	0.000134631	0.0646378	0.104718	0.110964	0.241984	-1
AT1G10380	Putative membrane lipoprotein	1	chr1	3400606	3402324	9.2077	9.32714	9.14229	8.92872	8.74595	8.92545	8.9547	8.9707	8.86027	9.22571	8.86671	8.92856	-0.359004	0.0117536	0.139116	-0.297154	0.014384	0.173956
AT1G10385	Vps51/Vps67 family (components of vesicular transport) protein	1	chr1	3403224	3405856	7.07185	7.18385	6.901	6.61903	6.83587	6.76157	6.95317	7.09898	6.85035	7.05223	6.73882	6.9675	-0.313412	0.0426134	0.19063	-0.0847355	0.482498	0.403304
AT1G10390	Nucleoporin autopeptidase	0	chr1	3407024	3412843	10.5293	10.755	10.8029	10.6086	10.5826	10.6465	10.7288	10.774	10.786	10.6957	10.6126	10.7629	-0.083174	0.42943	0.410611	0.0671927	0.511424	0.413791
AT1G10400	UDP-Glycosyltransferase superfamily protein	0	chr1	3414852	3416358	7.60331	7.99394	7.97118	7.29944	7.34955	7.45939	7.63057	7.78303	7.30152	7.85615	7.36946	7.57171	-0.486687	0.0477713	0.197	-0.284439	0.210213	0.293699
AT1G10410	Protein of unknown function (DUF1336)	0	chr1	3416680	3419639	10.9098	10.9092	10.786	10.9229	10.9292	10.9349	10.9487	10.967	11.0304	10.8683	10.929	10.982	0.0606472	0.278042	0.345175	0.113721	0.0912711	0.231453
AT_1_-_1_3422990-3423094		0	chr1	3422989	3423093	5.20759	4.83973	4.98065	4.81525	4.69417	5.00834	4.9708	4.8948	5.18333	5.00932	4.83925	5.01631	-0.170069	0.295417	0.352875	0.0069929	0.962013	0.548857
AT1G10417		0	chr1	3424186	3427457	7.11806	7.20575	7.13733	7.12198	7.01157	7.15829	7.38259	7.27171	7.36446	7.15371	7.09728	7.33959	-0.0564349	0.347086	0.376639	0.185871	0.014642	0.173956
AT1G10419		1	chr1	3428031	3428425	4.79293	4.64133	4.76313	4.78728	4.57379	4.81183	4.65313	4.66042	4.73734	4.73247	4.7243	4.68363	-0.00816802	0.931895	0.572289	-0.0488366	0.425566	0.382849
AT1G10430	protein phosphatase 2A-2	0	chr1	3428478	3430633	9.99423	10.0304	10.1037	10.1535	10.1147	10.1899	10.0721	10.049	10.0316	10.0428	10.1527	10.0509	0.109907	0.0552158	0.20492	0.00811227	0.830816	0.51353
AT1G10440	pre-tRNA	0	chr1	3431185	3431256	11.7307	11.5008	11.8838	11.5585	11.5732	11.9284	11.687	11.6136	11.2485	11.7051	11.6867	11.5163	-0.0183919	0.91633	0.568458	-0.188749	0.344692	0.351901
AT1G10450	SIN3-like 6	1	chr1	3431780	3438370	7.63306	7.78083	7.778	7.54206	7.79606	7.71208	7.62094	7.70748	7.76275	7.73063	7.6834	7.69706	-0.0472295	0.628868	0.482984	-0.0335709	0.627843	0.452537
AT1G10455		1	chr1	3438555	3439013	4.97952	5.12924	5.22066	5.24386	5.00359	5.25453	5.24334	5.595	5.38911	5.1098	5.16733	5.40915	0.0575209	0.622963	0.481297	0.299346	0.0811715	0.225428
AT1G10460	germin-like protein 7	0	chr1	3439322	3440320	7.76025	7.70436	7.68448	8.08773	7.98865	8.04302	7.40205	7.69148	7.69319	7.71636	8.0398	7.59557	0.323437	0.00113307	0.0859567	-0.120789	0.337665	0.34839
AT1G10470	response regulator 4	0	chr1	3442327	3443957	7.89496	7.99394	7.85289	8.46747	8.32866	8.47013	8.11911	8.15558	8.03404	7.91393	8.42208	8.10291	0.508155	0.00132625	0.0868746	0.188981	0.0275865	0.188548	1
AT1G10480	zinc finger protein 5	1	chr1	3449691	3451226	4.60897	4.48856	4.69558	4.47524	4.67955	4.42211	4.5174	4.7617	4.60036	4.5977	4.52563	4.62648	-0.0720717	0.508711	0.442002	0.0287806	0.774101	0.49776
AT1G10490	Domain of unknown function (DUF1726) ;Putative ATPase (DUF699)	1	chr1	3453228	3460620	5.75463	6.15058	5.74101	5.57255	5.84577	5.73201	5.64767	5.54336	5.97725	5.88207	5.71677	5.72276	-0.1653	0.361642	0.382873	-0.159313	0.443287	0.389206
AT1G10500	chloroplast-localized ISCA-like protein	0	chr1	3460000	3461485	10.6407	10.5523	10.5179	10.8543	10.8422	10.9041	10.7889	10.8958	11.0483	10.5703	10.8669	10.911	0.296571	0.00552274	0.116006	0.340667	0.0286155	0.189174
AT1G10510	RNI-like superfamily protein	1	chr1	3461635	3465786	8.44642	8.63585	8.47536	8.69733	8.81181	8.72372	8.5483	8.65153	8.49046	8.51921	8.74428	8.56343	0.225078	0.0411891	0.188793	0.0442265	0.590597	0.439673
AT1G10520	DNA polymerase lambda (POLL)	1	chr1	3465964	3469248	5.79148	6.25095	5.96929	6.17356	5.96758	6.10015	6.10374	6.17375	5.69495	6.00391	6.08043	5.99081	0.0765215	0.640649	0.487309	-0.0130955	0.951084	0.546443
AT1G10522		1	chr1	3469580	3471488	7.70825	7.88834	7.94731	7.82845	7.7524	7.89976	7.50182	7.80884	7.44862	7.84797	7.82687	7.58643	-0.0210963	0.815799	0.541128	-0.26154	0.133609	0.25388
AT1G10530		0	chr1	3471456	3472672	9.08587	9.064	9.0973	8.88236	8.84195	9.12973	9.01194	8.81715	8.90522	9.08239	8.95135	8.91143	-0.131046	0.281814	0.347196	-0.170957	0.0894273	0.230483
AT_1_+_2_3473460-3473603		1	chr1	3473459	3473602	4.81994	5.14413	5.00982	4.98592	5.26988	4.7883	4.70628	5.16744	5.22126	4.9913	5.0147	5.03166	0.0234051	0.897112	0.563937	0.0403613	0.843448	0.516969
AT1G10538		1	chr1	3474515	3474765	5.16197	5.1473	4.96589	5.25408	5.39512	5.37227	5.13288	5.21036	4.89619	5.09172	5.34049	5.07981	0.248772	0.0373734	0.184058	-0.0119122	0.922237	0.538793
AT1G10540	nucleobase-ascorbate transporter 8	0	chr1	3474864	3477927	5.72444	5.96679	5.96737	5.91849	6.23425	6.14246	5.86929	5.6664	5.91686	5.8862	6.0984	5.81751	0.212198	0.163308	0.285656	-0.0686881	0.571383	0.433755
AT1G10550	xyloglucan:xyloglucosyl transferase 33	0	chr1	3479153	3480988	8.88084	8.66779	8.68543	9.10792	9.13417	9.37102	9.13635	9.12608	8.93532	8.74468	9.20437	9.06592	0.459686	0.0142346	0.144352	0.321235	0.0273881	0.187985
AT_1_+_0_3482653-3482895		1	chr1	3482652	3482894	4.75792	4.65555	4.50299	4.89879	5.0484	4.85259	5.15877	5.38455	4.81904	4.63882	4.93326	5.12079	0.294443	0.0383781	0.185138	0.481966	0.0818511	0.226066
AT1G10560	plant U-box 18	1	chr1	3484580	3486965	8.60447	8.66017	8.7089	8.35974	8.36399	8.66779	8.51896	8.51811	8.32158	8.65785	8.46384	8.45289	-0.194007	0.190599	0.299962	-0.204963	0.0710921	0.219113
AT1G10570	Cysteine proteinases superfamily protein	1	chr1	3487584	3491277	8.28775	8.30365	8.33804	8.2657	8.2759	8.37294	8.46474	8.35746	8.34739	8.30982	8.30485	8.38986	-0.00496939	0.90311	0.565197	0.0800484	0.155252	0.2665
AT1G10580	Transducin/WD40 repeat-like superfamily protein	0	chr1	3491281	3493737	9.84732	10.0458	10.1852	9.8682	9.84938	9.89412	9.99399	10.0295	10.0009	10.0261	9.87057	10.0081	-0.155518	0.25227	0.331957	-0.0179445	0.872037	0.525278
AT1G10585	basic helix-loop-helix (bHLH) DNA-binding superfamily protein	0	chr1	3493940	3495144	4.52754	4.68888	4.43986	4.54384	4.5139	4.70046	4.76444	4.60906	4.67176	4.55209	4.58607	4.68175	0.0339734	0.734515	0.516945	0.129657	0.218781	0.297422
AT1G10586	basic helix-loop-helix (bHLH) DNA-binding superfamily protein	0	chr1	3496928	3499439	5.64456	5.53324	5.49662	5.56013	5.6771	5.92735	5.66804	5.52438	5.77048	5.55814	5.72153	5.6543	0.163385	0.268132	0.340383	0.0961596	0.327957	0.344329
AT1G10588	Gibberellin-regulated family protein	1	chr1	3501145	3501904	5.17926	5.19592	5.5812	5.20729	5.13841	5.18445	5.03735	5.2692	5.29071	5.31879	5.17672	5.19909	-0.142075	0.392455	0.395899	-0.119704	0.489273	0.405681
AT1G10590	Nucleic acid-binding, OB-fold-like protein	0	chr1	3502004	3503457	13.2115	13.2824	13.3475	13.2909	13.2873	13.3267	13.1145	13.1743	13.0297	13.2805	13.3017	13.1062	0.0212133	0.65027	0.490534	-0.174274	0.0388555	0.197143
AT1G10600	associated molecule with the SH3 domain of STAM 2	1	chr1	3503704	3505502	8.41885	8.3768	8.36542	8.68797	8.67099	8.72536	8.21102	8.29289	8.44927	8.38702	8.69477	8.31773	0.30775	0.000175947	0.0646378	-0.0692935	0.427459	0.383472
AT1G10610	basic helix-loop-helix (bHLH) DNA-binding superfamily protein	1	chr1	3506186	3509006	6.49938	6.67105	6.42687	6.69812	6.75629	6.88406	6.28219	6.75168	6.85165	6.53243	6.77949	6.62851	0.247061	0.0572428	0.207268	0.0960764	0.651778	0.460552
AT1G10620	Protein kinase superfamily protein	0	chr1	3509001	3511975	5.32112	4.93945	5.28904	5.7914	5.25996	5.25867	5.34117	5.36377	5.21766	5.18321	5.43668	5.30753	0.253469	0.312126	0.361139	0.124327	0.421963	0.38182
AT1G10630	ADP-ribosylation factor A1F	0	chr1	3512795	3514729	7.2654	7.39633	7.52686	7.39751	7.17372	7.39867	7.60639	7.52494	7.56108	7.3962	7.3233	7.56414	-0.0728949	0.530396	0.449445	0.167939	0.146659	0.261361
AT1G10640	Pectin lyase-like superfamily protein	0	chr1	3515365	3517888	6.34406	6.73778	7.6624	6.35855	6.07993	6.11255	7.61883	7.48993	7.05569	6.91475	6.18368	7.38815	-0.73107	0.197744	0.304037	0.473405	0.354768	0.355461
AT1G10650	SBP (S-ribonuclease binding protein) family protein	0	chr1	3524018	3526346	7.80521	7.56048	7.61225	7.63057	7.66018	7.66393	7.65625	7.70794	7.9417	7.65931	7.65156	7.76863	-0.00775676	0.92694	0.571118	0.109314	0.397489	0.372679
AT1G10652		1	chr1	3527709	3527831	5.5381	5.03838	5.07497	5.20367	5.0187	5.36532	5.3731	5.30955	5.57353	5.21715	5.1959	5.41873	-0.0212527	0.917074	0.568753	0.201578	0.344949	0.35194
AT1G10657	Plant protein 1589 of unknown function	1	chr1	3530467	3531842	6.46046	6.31585	6.66911	6.43883	6.2676	6.27506	6.4888	6.3641	6.23244	6.48181	6.32716	6.36178	-0.154644	0.274776	0.34351	-0.120029	0.4012	0.374277
AT1G10660		1	chr1	3532424	3535131	8.74444	8.66312	8.66554	8.9451	8.91413	9.00168	8.77531	8.73519	8.91468	8.69104	8.95364	8.80839	0.262602	0.00209926	0.0975114	0.117359	0.15095	0.263724
AT1G10670	ATP-citrate lyase A-1	1	chr1	3535383	3538439	12.8044	12.9358	13.0056	12.6629	12.6409	12.7731	12.7085	12.7481	12.6346	12.9153	12.6923	12.6971	-0.22296	0.0420921	0.189914	-0.21818	0.0451716	0.201569
AT1G10680	P-glycoprotein 10	0	chr1	3538470	3543782	5.37859	5.64502	5.38793	5.54192	5.46266	5.59813	5.72677	5.35	5.38972	5.47052	5.53423	5.48883	0.0637186	0.556732	0.458979	0.0183113	0.908027	0.535065
AT1G10682	other RNA	0	chr1	3544991	3545471	15.4874	15.5272	15.5594	15.6354	15.6354	15.8597	15.7651	15.7578	15.7651	15.5247	15.7102	15.7627	0.185515	0.122422	0.258785	0.23798	0.00697024	0.155297
AT_1_-_0_3548019-3548135		0	chr1	3548018	3548134	5.00567	4.65593	4.48442	4.56723	4.62453	4.62502	4.50596	4.72614	4.34467	4.71534	4.6056	4.52559	-0.109742	0.549384	0.456134	-0.189748	0.3776	0.3653
AT1G10690		0	chr1	3549992	3550632	9.3513	9.40414	9.49855	9.41848	9.42562	9.51089	9.41297	9.55362	9.55216	9.418	9.45166	9.50625	0.0336673	0.558997	0.459536	0.0882556	0.237253	0.305998
AT1G10700	phosphoribosyl pyrophosphate (PRPP) synthase 3	1	chr1	3554104	3556503	10.2234	10.2616	10.2704	10.2579	10.3792	10.4026	10.3902	10.307	10.536	10.2518	10.3466	10.4111	0.0947507	0.159889	0.283553	0.159261	0.134667	0.254568
AT1G10705		1	chr1	3557114	3557457	5.04688	5.04903	4.85508	4.67814	5.11247	4.89674	4.53664	5.00418	4.77488	4.98366	4.89578	4.7719	-0.0878802	0.577256	0.46611	-0.211764	0.255714	0.314594
AT1G10710	poor homologous synapsis 1	1	chr1	3558358	3561634	5.48705	5.10517	5.34735	5.68904	5.45105	5.19194	5.63048	5.51546	5.57712	5.31319	5.44401	5.57435	0.13082	0.513839	0.443786	0.261162	0.134793	0.254637
AT1G10717		1	chr1	3562180	3562554	5.04356	5.09921	4.93109	5.31534	5.24109	5.16412	5.344	5.35532	5.1942	5.02462	5.24019	5.29784	0.215565	0.0315441	0.176877	0.273218	0.0190167	0.180534
AT1G10720	BSD domain-containing protein	1	chr1	3562952	3564759	9.80025	9.72289	9.65959	9.85727	9.87978	9.77534	9.83442	9.90341	9.9575	9.72757	9.83746	9.89844	0.109886	0.104265	0.246364	0.170869	0.034992	0.194323
AT1G10730	Clathrin adaptor complexes medium subunit family protein	1	chr1	3565463	3567779	7.32824	7.34242	7.36245	7.61844	7.51359	7.57481	7.45517	7.49964	7.68294	7.34437	7.56895	7.54592	0.224576	0.0115401	0.138267	0.201549	0.0988546	0.235092
AT1G10740	alpha/beta-Hydrolases superfamily protein	0	chr1	3567905	3570838	9.9854	9.85861	9.7024	9.84089	9.77181	9.7188	9.84187	9.88357	9.93909	9.8488	9.77717	9.88817	-0.0716391	0.485854	0.432701	0.0393706	0.686161	0.47151
AT1G10745	Maternally expressed gene (MEG) family protein	1	chr1	3572710	3573066	6.0374	5.75061	5.82019	5.42964	5.9578	5.92244	5.83992	5.72392	6.00735	5.8694	5.76996	5.85706	-0.0994402	0.639186	0.48679	-0.0123374	0.922609	0.538873
AT1G10747	Maternally expressed gene (MEG) family protein	1	chr1	3574312	3574830	5.30658	5.54334	5.45687	5.56839	5.44233	5.20741	5.85433	5.06925	5.38885	5.4356	5.40604	5.43747	-0.0295567	0.828308	0.544549	0.00187845	0.994324	0.556719
AT1G10750	Protein of Unknown Function (DUF239)	0	chr1	3574807	3578474	6.98109	7.15235	7.12274	7.34322	7.13475	7.26994	6.99314	7.31832	7.40556	7.0854	7.2493	7.23901	0.163909	0.113688	0.252372	0.153611	0.349816	0.353543
AT1G10760	Pyruvate phosphate dikinase, PEP/pyruvate binding domain	0	chr1	3581034	3590928	9.3267	9.60164	9.65713	9.49697	9.435	9.47131	9.4745	9.51738	9.50213	9.52849	9.46776	9.498	-0.0607305	0.614439	0.478709	-0.0304903	0.794255	0.502974
AT1G10770	Plant invertase/pectin methylesterase inhibitor superfamily protein	0	chr1	3591633	3592411	5.11095	5.269	5.00965	5.26895	5.18675	5.35056	5.565	5.16631	5.42051	5.12987	5.26876	5.38394	0.138888	0.207074	0.308903	0.254074	0.153097	0.265007
AT1G10780	F-box/RNI-like superfamily protein	0	chr1	3592746	3595077	7.89005	8.19415	8.20482	7.97126	7.86155	7.89988	7.94509	8.01253	7.68397	8.09634	7.91089	7.88053	-0.185444	0.20775	0.309132	-0.215808	0.207947	0.29283
AT1G10790		1	chr1	3596360	3597847	7.08049	7.26244	6.81925	7.20816	6.93793	7.12987	7.1562	7.01964	7.0561	7.05406	7.09199	7.07732	0.0379225	0.817046	0.541396	0.0232547	0.87665	0.526336
AT1G10800		0	chr1	3598158	3598591	7.02532	7.14264	7.08427	7.6624	7.61606	7.48346	7.01537	7.17298	7.28276	7.08407	7.5873	7.15704	0.50323	0.00268855	0.10145	0.0729631	0.457719	0.394132
AT1G10810	NAD(P)-linked oxidoreductase superfamily protein	1	chr1	3599271	3600877	8.76365	8.86848	8.95891	8.47783	8.29699	8.55462	8.54176	8.45092	8.14323	8.86368	8.44315	8.37864	-0.420527	0.0137523	0.142949	-0.485041	0.0391333	0.197485
AT1G10820	Protein of unknown function (DUF3755)	0	chr1	3600910	3605076	6.12595	6.19238	6.20021	6.4517	6.30014	6.5202	6.32553	6.11739	6.24518	6.17284	6.42401	6.22937	0.25117	0.0477987	0.197039	0.0565227	0.457683	0.394132
AT1G10830	15-cis-zeta-carotene isomerase	0	chr1	3605576	3607493	8.03594	7.91585	7.86841	8.27242	8.24695	8.08033	8.2657	8.36168	8.25109	7.94007	8.1999	8.29283	0.259833	0.0308455	0.17575	0.352759	0.00617675	0.154365
AT1G10840	translation initiation factor 3 subunit H1	0	chr1	3607631	3610520	12.1638	12.3056	12.4026	12.1446	12.1781	12.2314	12.1861	12.203	12.1406	12.2906	12.1847	12.1766	-0.105996	0.262518	0.337673	-0.114077	0.237452	0.306087
AT1G10850	Leucine-rich repeat protein kinase family protein	1	chr1	3611747	3614613	8.34305	8.50003	8.62143	8.38557	8.20672	8.30377	8.2063	8.36399	8.28587	8.48817	8.29869	8.28539	-0.189483	0.131116	0.264888	-0.202783	0.111636	0.242047
AT1G10865		0	chr1	3614513	3616159	11.6949	11.5476	11.5758	11.8993	11.8654	11.881	11.7689	11.7067	11.7636	11.6061	11.8819	11.7464	0.275792	0.0216712	0.159563	0.140351	0.0723669	0.219875
AT1G10870	ARF-GAP domain 4	0	chr1	3616610	3623758	9.49806	9.54349	9.5618	9.41779	9.44022	9.49064	9.50191	9.52173	9.49601	9.53445	9.44955	9.50655	-0.0849004	0.0424156	0.190178	-0.0278977	0.277149	0.32393
AT1G10880	Core-2/I-branching beta-1,6-N-acetylglucosaminyltransferase family protein	0	chr1	3624035	3627082	5.06858	5.24834	5.11161	5.25888	4.93995	4.85587	4.78371	5.27508	5.12762	5.14284	5.01823	5.06214	-0.124611	0.427113	0.409672	-0.0807094	0.645115	0.458331
AT1G10890		1	chr1	3627726	3630765	10.2136	10.2232	10.1926	10.3295	10.3809	10.327	10.1446	10.1895	10.204	10.2098	10.3458	10.1794	0.135999	0.00633557	0.120782	-0.0304192	0.227177	0.301481
AT1G10900	Phosphatidylinositol-4-phosphate 5-kinase family protein	0	chr1	3632234	3637141	10.5686	10.6705	10.6843	10.7723	10.8402	10.8224	10.5944	10.644	10.5678	10.6411	10.8116	10.602	0.170503	0.0244485	0.164208	-0.0390695	0.422634	0.381906
AT1G10910	Pentatricopeptide repeat (PPR) superfamily protein	1	chr1	3639878	3644162	7.73056	7.86617	7.99112	7.86537	7.89723	7.86474	7.77753	7.86173	7.70687	7.86262	7.87578	7.78204	0.0131637	0.877878	0.558517	-0.0805724	0.420353	0.381066
AT1G10920	NB-ARC domain-containing disease resistance protein	0	chr1	3644420	3647768	6.28362	5.96603	5.95237	6.12446	5.93023	6.09802	5.81655	6.15745	6.10605	6.06734	6.0509	6.02668	-0.0164355	0.902678	0.565135	-0.0406575	0.801768	0.505005
AT1G10930	DNA helicase (RECQl4A)	0	chr1	3647894	3655590	8.20053	8.54606	8.72208	8.22836	8.20635	8.24318	8.45806	8.36646	8.13474	8.48956	8.22596	8.31975	-0.263593	0.226986	0.319062	-0.169803	0.410241	0.377469
AT1G10940	Protein kinase superfamily protein	0	chr1	3655777	3658608	9.15423	9.12066	8.99196	9.26149	9.18654	9.1374	9.12167	9.22698	9.12233	9.08895	9.19514	9.15699	0.106195	0.164437	0.2861	0.0680426	0.330617	0.345429
AT1G10950	transmembrane nine 1	1	chr1	3659209	3663984	8.67129	8.7489	8.8013	8.4929	8.51885	8.55575	8.70217	8.72575	8.61312	8.7405	8.5225	8.68035	-0.217997	0.0152412	0.146263	-0.0601503	0.304259	0.335188
AT1G10960	ferredoxin 1	1	chr1	3664386	3665039	11.6596	11.7247	11.8742	11.6443	11.5687	11.6102	11.7813	11.763	11.6324	11.7529	11.6077	11.7256	-0.145141	0.138776	0.270507	-0.0273208	0.748152	0.490471
AT1G10970	zinc transporter 4 precursor	0	chr1	3665087	3667139	7.72332	7.76025	7.75212	7.8896	7.83344	7.86217	7.86949	7.76275	7.73236	7.74523	7.86174	7.7882	0.116506	0.0058972	0.118108	0.0429723	0.411881	0.378068
AT1G10980	Lung seven transmembrane receptor family protein	0	chr1	3667248	3669902	4.79227	4.72099	5.28271	5.10406	4.96956	4.85766	4.752	4.85818	4.88631	4.93199	4.97709	4.83216	0.045103	0.829937	0.545044	-0.0998274	0.632316	0.454363
AT1G10990		0	chr1	3670278	3671187	7.81172	7.79811	7.93405	7.50911	7.59588	7.40889	7.49849	7.705	7.29011	7.84796	7.50463	7.49787	-0.343335	0.00868528	0.12782	-0.350093	0.0862312	0.228661
AT1G11000	Seven transmembrane MLO family protein	0	chr1	3671756	3675979	10.3737	10.4973	10.6403	10.1077	10.1834	10.408	10.2145	10.2245	9.99225	10.5038	10.233	10.1437	-0.27076	0.0860877	0.23148	-0.360056	0.0290668	0.189236
AT1G11020	RING/FYVE/PHD zinc finger superfamily protein	1	chr1	3676691	3678524	10.3452	10.2937	10.2192	10.4355	10.6294	10.4345	10.3283	10.3424	10.4498	10.286	10.4998	10.3735	0.213754	0.0600946	0.209895	0.0874466	0.174628	0.276604
AT1G11040	HSP40/DnaJ peptide-binding protein	0	chr1	3679225	3680924	6.07466	5.88157	6.01541	5.92822	5.77952	5.80229	5.74019	5.70879	5.86597	5.99054	5.83668	5.77165	-0.153869	0.107361	0.248433	-0.218893	0.0442108	0.201159
AT1G11050	Protein kinase superfamily protein	1	chr1	3681888	3684169	8.09135	8.28567	8.30168	8.43043	8.27466	8.54431	8.38943	8.54851	8.45555	8.22623	8.41647	8.4645	0.190234	0.140926	0.271659	0.238265	0.0507794	0.205535
AT1G11055		0	chr1	3683919	3684095	5.31193	4.78839	4.9775	5.16751	5.18659	4.93619	5.10111	4.85978	5.04994	5.02594	5.09676	5.00361	0.0708218	0.709398	0.509311	-0.02233	0.904013	0.534117
AT1G11060	WAPL (Wings apart-like protein regulation of heterochromatin) protein	1	chr1	3684568	3689847	9.48901	9.68589	9.72395	9.52582	9.56698	9.56698	9.62139	9.66901	9.4166	9.63295	9.55326	9.569	-0.079692	0.388185	0.394093	-0.0639508	0.579922	0.436178
AT1G11070		0	chr1	3690212	3693648	6.29597	6.37202	7.05022	6.1864	6.36301	6.26847	6.86952	6.63159	6.49043	6.57274	6.27263	6.66385	-0.300111	0.336569	0.372376	0.0911081	0.754211	0.492313
AT1G11080	serine carboxypeptidase-like 31	0	chr1	3694672	3698013	8.51811	8.71979	9.23876	8.15674	8.33514	8.13279	9.41917	9.18967	9.0447	8.82555	8.20822	9.21784	-0.61733	0.0923343	0.236732	0.392292	0.202696	0.290455
AT1G11090	alpha/beta-Hydrolases superfamily protein	1	chr1	3702608	3703779	10.7021	10.7271	10.824	10.7073	10.728	10.6304	10.8975	10.9098	10.8605	10.7511	10.6885	10.8892	-0.0625121	0.26255	0.337673	0.138185	0.0503304	0.205276
AT1G11100	SNF2 domain-containing protein / helicase domain-containing protein / zinc finger protein-related	0	chr1	3703672	3709302	7.29038	7.03484	7.08636	7.01248	7.05911	7.09333	6.95235	6.67079	6.77612	7.13719	7.05497	6.79975	-0.08222	0.40499	0.40052	-0.337441	0.040928	0.199376
AT1G11110	LisH and RanBPM domains containing protein	1	chr1	3710208	3712503	6.17067	5.58539	5.87857	5.91919	5.75669	6.1271	5.89628	5.22605	5.51134	5.87821	5.93433	5.54455	0.0561183	0.795405	0.535229	-0.333653	0.265861	0.319251
AT1G11112		0	chr1	3712999	3713735	5.10268	5.12252	5.0965	5.18955	5.1181	5.09921	4.94779	4.99087	4.91956	5.10723	5.13562	4.95274	0.0283888	0.412861	0.403774	-0.154494	0.00993367	0.167337
AT1G11120		1	chr1	3715184	3717320	8.1549	8.07	8.28871	8.03971	7.91281	8.27346	8.10328	8.05946	7.97245	8.1712	8.07532	8.04506	-0.0958776	0.489053	0.433939	-0.126139	0.180383	0.278927
AT1G11125		1	chr1	3718783	3719711	6.16897	6.50342	6.52907	6.50988	6.39254	6.41497	6.66202	6.64054	6.74218	6.40049	6.43913	6.68158	0.0386449	0.776114	0.529957	0.281096	0.128257	0.251227
AT1G11130	Leucine-rich repeat protein kinase family protein	1	chr1	3722857	3727450	9.75301	9.77917	9.70422	9.52942	9.51057	9.51392	9.9029	9.95428	9.8382	9.74547	9.51797	9.89846	-0.227499	0.0062506	0.120747	0.152987	0.0247964	0.186999
AT1G11145	Protein of unknown function (DUF674)	0	chr1	3727532	3728166	5.23557	5.21547	5.22946	5.31415	5.16314	6.0361	5.15716	5.27259	5.09429	5.22683	5.50446	5.17468	0.277629	0.411033	0.402957	-0.052152	0.423293	0.382166
AT1G11150	transposable element gene	1	chr1	3728971	3731624	4.64464	4.92654	5.05031	4.72022	5.08889	5.00242	4.91459	4.98615	4.88932	4.87383	4.93718	4.93002	0.0633449	0.718605	0.512037	0.0561904	0.689557	0.472552
AT1G11160	Transducin/WD40 repeat-like superfamily protein	1	chr1	3733139	3739842	6.4791	6.60024	6.52677	6.49917	6.31516	6.32726	6.46542	6.21299	6.00395	6.53537	6.38053	6.22745	-0.154843	0.103921	0.245962	-0.307919	0.139698	0.257397
AT1G11170	Protein of unknown function (DUF707)	1	chr1	3740765	3744675	7.8903	7.92787	8.1549	7.7996	7.89005	7.69979	8.34872	8.1529	8.16033	7.99102	7.79648	8.22065	-0.194543	0.132091	0.265771	0.229623	0.0973156	0.234631
AT1G11175	other RNA	1	chr1	3744858	3745655	10.3609	10.267	10.0756	10.6054	10.7263	10.6685	10.5599	10.3817	10.6515	10.2345	10.6667	10.531	0.432237	0.02286	0.161381	0.296514	0.0622766	0.214292
AT1G11180	Secretory carrier membrane protein (SCAMP) family protein	1	chr1	3745774	3748521	8.74568	8.6162	8.57003	8.98011	9.08778	8.94581	8.78624	8.71439	8.82101	8.64397	9.00457	8.77388	0.360595	0.00672201	0.122113	0.12991	0.116608	0.244052
AT1G11185	other RNA	1	chr1	3749510	3750035	10.9661	10.8479	10.6619	11.2271	11.341	11.1762	10.7467	10.8801	11.0701	10.8253	11.2481	10.8989	0.422801	0.0231917	0.161814	0.073617	0.598861	0.442566
AT1G11190	bifunctional nuclease i	0	chr1	3750066	3752780	11.2921	11.2465	10.5731	11.5217	11.5068	11.5346	11.614	11.6649	11.8051	11.0373	11.521	11.6947	0.483789	0.172731	0.29004	0.657426	0.098026	0.234813
AT1G11200	Protein of unknown function (DUF300)	1	chr1	3753365	3755641	9.56417	9.59158	9.48162	9.51713	9.42069	9.5196	9.55492	9.61675	9.45022	9.54579	9.48581	9.54063	-0.0599852	0.265687	0.338884	-0.00516058	0.934787	0.542241
AT1G11210	Protein of unknown function (DUF761)	0	chr1	3755677	3756998	7.74562	7.74864	7.42766	7.83713	7.85862	7.94436	8.21581	8.1984	8.33864	7.64064	7.88004	8.25095	0.239394	0.144265	0.27364	0.610306	0.0175859	0.17834
AT_1_-_0_3758073-3758165		0	chr1	3758073	3758165	5.60669	5.83097	5.72641	5.66561	5.67095	5.51607	5.60599	5.47224	5.69215	5.72136	5.61754	5.59013	-0.103813	0.279386	0.345767	-0.131228	0.222992	0.29948
AT1G11220	Protein of unknown function (DUF761)	0	chr1	3759862	3761165	6.76665	7.12611	6.94821	6.96156	6.97951	6.9477	6.97858	7.22119	6.92887	6.94699	6.96292	7.04288	0.0159351	0.892275	0.562626	0.0958913	0.524823	0.418972
AT1G11230	Protein of unknown function (DUF761)	0	chr1	3763268	3764483	4.97038	4.84619	5.3178	4.90867	5.08156	5.18868	4.75884	5.06394	4.9725	5.04479	5.05964	4.93176	0.0148471	0.932831	0.572534	-0.113034	0.543038	0.424375
AT1G11240		0	chr1	3766754	3768294	11.2853	11.2306	11.4304	11.28	11.2965	11.3837	11.2248	11.1877	11.0903	11.3154	11.32	11.1676	0.00461889	0.94982	0.576636	-0.147829	0.118609	0.245268
AT1G11250	syntaxin of plants 125	1	chr1	3768724	3769706	5.08317	5.19785	5.33582	4.99199	5.03358	4.76053	5.05991	5.10122	4.8349	5.20561	4.9287	4.99868	-0.276915	0.0702082	0.21924	-0.206934	0.135179	0.254846
AT1G11260	sugar transporter 1	1	chr1	3777328	3780337	13.702	13.6053	13.6004	13.6707	13.51	13.6278	13.6211	13.6392	13.4282	13.6359	13.6028	13.5628	-0.0331045	0.604338	0.475593	-0.0730971	0.404824	0.375714
AT1G11270	F-box and associated interaction domains-containing protein	0	chr1	3780429	3786990	7.68294	7.53174	7.78543	7.76206	7.6332	7.81497	7.47336	7.54735	7.3946	7.6667	7.73674	7.47177	0.0700377	0.489589	0.434175	-0.194938	0.100603	0.236228
AT1G11265	transposable element gene	1	chr1	3781235	3785293	5.47021	5.18617	5.37782	5.52274	5.27282	4.9554	5.21745	5.25419	5.21101	5.34473	5.25032	5.22755	-0.0944139	0.643987	0.48845	-0.117183	0.295143	0.331123
AT1G11280	S-locus lectin protein kinase family protein	0	chr1	3787334	3790876	6.87215	7.19041	7.05352	7.15134	6.83738	7.05338	7.07859	7.05697	6.96986	7.03869	7.01403	7.03514	-0.0246637	0.859573	0.553628	-0.00355487	0.973743	0.552205
AT1G11290	Pentatricopeptide repeat (PPR) superfamily protein	0	chr1	3791454	3793883	6.16204	6.48365	6.59228	6.36595	6.35441	6.31077	6.29183	6.36885	6.2808	6.41265	6.34371	6.31383	-0.0689422	0.647969	0.489591	-0.0988274	0.526656	0.419278
AT1G11300	protein serine/threonine kinases;protein kinases;ATP binding;sugar binding;kinases;carbohydrate binding	1	chr1	3794238	3800719	7.22201	7.19923	6.34475	6.34189	6.33317	6.75426	6.55504	6.57377	6.96363	6.92199	6.47644	6.69748	-0.445556	0.262082	0.337372	-0.224513	0.534054	0.421727
AT1G11310	Seven transmembrane MLO family protein	0	chr1	3800738	3804185	9.92472	9.6906	9.59823	9.75429	9.65287	9.77751	10.0502	10.066	10.0348	9.73785	9.72822	10.0503	-0.00962609	0.933174	0.572626	0.31248	0.0833659	0.227337
AT1G11320		1	chr1	3807128	3808875	8.57187	8.4971	8.70139	8.49514	8.4466	8.66665	8.56297	8.49496	8.39506	8.59012	8.53613	8.48433	-0.0539928	0.579391	0.466906	-0.105787	0.244423	0.309289
AT1G11330	S-locus lectin protein kinase family protein	1	chr1	3810093	3813607	8.7776	8.86301	9.10338	9.01328	8.97323	8.85472	9.21799	9.33411	9.22084	8.91466	8.94708	9.25764	0.0324139	0.78529	0.532395	0.342982	0.0571463	0.210109
AT1G11340	S-locus lectin protein kinase family protein	0	chr1	3814116	3817420	5.1388	5.34964	5.2872	5.3109	5.16917	5.32925	5.25521	5.23871	5.37664	5.25855	5.26977	5.29019	0.0112254	0.896019	0.563755	0.0316408	0.701572	0.476488
AT1G11350	S-domain-1 13	0	chr1	3817591	3820805	6.10144	6.49275	6.46013	6.64951	6.55921	6.67912	6.53027	6.46167	6.48743	6.35144	6.62928	6.49312	0.277841	0.148645	0.275848	0.141682	0.375651	0.364251
AT1G11360	Adenine nucleotide alpha hydrolases-like superfamily protein	0	chr1	3821443	3823088	5.84331	5.76083	5.86642	5.91591	6.05808	6.11985	5.96059	6.39897	6.14072	5.82352	6.03128	6.16676	0.207758	0.0548501	0.204798	0.343239	0.106524	0.240054
AT1G11362	Plant invertase/pectin methylesterase inhibitor superfamily protein	0	chr1	3824510	3825196	5.32756	5.33189	5.63338	5.53215	5.52342	5.48516	5.75079	5.09341	5.4036	5.43094	5.51358	5.41594	0.0826343	0.500956	0.438992	-0.0150093	0.948707	0.545925
AT1G11370	Pectin lyase-like superfamily protein	0	chr1	3828098	3830945	5.09542	4.9632	5.27962	5.2514	5.06287	5.17538	5.04804	4.9637	5.16432	5.11275	5.16322	5.05869	0.0504687	0.666499	0.495828	-0.0540594	0.649311	0.459705
AT1G11380	PLAC8 family protein	1	chr1	3832623	3834191	8.12974	7.99944	7.81707	8.23894	8.16214	8.02761	7.8609	8.21637	8.10586	7.98208	8.14289	8.06104	0.16081	0.225727	0.31853	0.0789589	0.600373	0.443093
AT1G11390	Protein kinase superfamily protein	0	chr1	3834459	3837629	8.70093	8.8417	8.86396	8.63259	8.74548	8.96172	8.77354	8.69124	8.67204	8.8022	8.77993	8.71228	-0.0222667	0.851357	0.551243	-0.0899218	0.221339	0.298862
AT1G11400	partner of Y14-MAGO	1	chr1	3837821	3840207	10.936	10.9759	10.9867	10.9564	10.9867	10.9403	10.8374	10.9429	10.8877	10.9662	10.9611	10.8893	-0.00509139	0.816917	0.541396	-0.0768972	0.110962	0.241984
AT1G11410	S-locus lectin protein kinase family protein	1	chr1	3841286	3844432	7.75374	7.62017	7.52892	7.36071	7.1953	7.32956	7.58047	7.69375	7.79041	7.63428	7.29519	7.68821	-0.339088	0.016729	0.149459	0.0539321	0.577883	0.435708
AT1G11420	DOMAIN OF UNKNOWN FUNCTION 724 2	0	chr1	3844581	3846872	8.66996	8.83377	8.95968	8.80917	8.73085	8.70423	8.53382	8.59997	8.56379	8.82114	8.74808	8.56586	-0.0730561	0.483917	0.432033	-0.255276	0.0864118	0.228752
AT1G11430	plastid developmental protein DAG, putative	1	chr1	3847243	3849162	8.86111	8.88206	9.00353	9.02393	9.00661	9.00531	8.88586	8.96189	8.94683	8.91557	9.01195	8.93153	0.0963811	0.159876	0.283553	0.0159568	0.770921	0.496988
AT1G11440		1	chr1	3849360	3850662	8.57413	8.49046	8.45607	8.7003	8.51194	8.66232	8.55096	8.70259	8.66626	8.50689	8.62485	8.63993	0.117963	0.169621	0.28873	0.133044	0.086497	0.228774
AT1G11450	nodulin MtN21 /EamA-like transporter family protein	1	chr1	3853243	3855385	10.523	10.6344	10.9187	10.5262	10.3086	10.4101	10.3561	10.2787	10.1907	10.692	10.415	10.2752	-0.277088	0.128004	0.262641	-0.416881	0.0557312	0.209601
AT1G11460	nodulin MtN21 /EamA-like transporter family protein	1	chr1	3857005	3859268	10.4962	10.6517	10.9356	10.4461	10.2865	10.3567	10.4468	10.3266	10.1082	10.6945	10.3631	10.2938	-0.331436	0.110586	0.250196	-0.400674	0.0732464	0.219908
AT1G11470	Pentatricopeptide repeat (PPR) superfamily protein	0	chr1	3859662	3860604	7.04805	7.01109	6.91969	6.57729	6.53198	6.78117	6.76369	6.05632	6.42801	6.99294	6.63015	6.41601	-0.362797	0.0251412	0.165685	-0.576936	0.101172	0.236476
AT_1_+_0_3861718-3861810		1	chr1	3861718	3861810	5.49111	5.66285	5.55161	5.6114	5.20836	5.52339	5.37731	5.61517	5.57631	5.56852	5.44772	5.52293	-0.120807	0.436229	0.413554	-0.0455945	0.639515	0.456641
AT1G11475	RNA polymerases N / 8 kDa subunit	1	chr1	3862399	3864030	10.3689	10.4561	10.5254	10.6636	10.5681	10.5811	10.5309	10.5374	10.3647	10.4501	10.6043	10.4776	0.154173	0.0553169	0.20492	0.0275211	0.724092	0.483181
AT1G11480	eukaryotic translation initiation factor-related	0	chr1	3864153	3866969	8.71557	8.58255	8.63305	8.54957	8.47395	8.48034	8.47353	8.4375	8.52442	8.64372	8.50129	8.47849	-0.142435	0.0452814	0.193508	-0.165236	0.0300389	0.189849
AT1G11482		0	chr1	3867405	3868870	5.57924	5.35723	5.5967	5.43761	5.3302	5.51065	5.73459	5.3038	5.5247	5.51105	5.42615	5.52103	-0.0849029	0.420307	0.40658	0.00997811	0.949514	0.546097
AT1G11490	zinc finger (C2H2 type) family protein	0	chr1	3868884	3870065	6.42518	6.3695	6.37428	6.07331	6.00395	6.17601	5.99255	5.57886	5.95625	6.38965	6.08442	5.84255	-0.305228	0.0168818	0.149777	-0.547097	0.0514497	0.205958
AT1G11500	Protein of unknown function (DUF1218)	1	chr1	3870833	3871570	7.39942	7.4019	7.45058	7.59095	7.54481	7.37358	7.15789	7.20865	7.09691	7.4173	7.50311	7.15448	0.0858131	0.322903	0.365799	-0.262818	0.00549365	0.148815
AT1G11510	DNA-binding storekeeper protein-related transcriptional regulator	0	chr1	3871778	3872836	4.98323	5.37542	4.91214	4.61393	4.8089	4.73257	5.04566	4.71249	4.92125	5.09026	4.71847	4.89313	-0.371795	0.108757	0.249275	-0.19713	0.32813	0.344344
AT1G11520	pliceosome associated protein-related	1	chr1	3873029	3873619	9.1758	9.16909	9.22707	9.16029	9.21901	9.14381	9.04875	9.08809	8.78106	9.19065	9.17437	8.97263	-0.0162847	0.608808	0.476785	-0.218018	0.147962	0.261836
AT1G11530	C-terminal cysteine residue is changed to a serine 1	1	chr1	3874437	3875484	10.1009	9.92232	9.90038	10.593	10.6679	10.595	10.3068	10.3162	10.3941	9.97452	10.6187	10.3391	0.644153	0.00446861	0.112393	0.364535	0.0168268	0.177501
AT1G11540	Sulfite exporter TauE/SafE family protein	0	chr1	3875442	3877155	9.28723	9.26243	9.36691	9.39943	9.45801	9.49601	9.16885	9.22198	9.34879	9.30552	9.45115	9.24654	0.145629	0.0266136	0.168053	-0.0589819	0.406727	0.376282
AT1G11545	xyloglucan endotransglucosylase/hydrolase 8	0	chr1	3878550	3880361	10.9176	10.898	10.9144	10.7507	10.7122	10.723	10.6775	10.7113	10.4215	10.91	10.7287	10.6034	-0.181345	0.000742384	0.0841912	-0.306607	0.0780241	0.223107
AT1G11550	pre-tRNA	1	chr1	3881529	3881608	10.2482	9.95519	10.1599	9.80116	9.84677	9.81599	10.1224	9.49747	9.80824	10.1211	9.82131	9.80937	-0.299788	0.0712785	0.219845	-0.311724	0.221059	0.29878
AT1G11560	Oligosaccharyltransferase complex/magnesium transporter family protein	1	chr1	3881788	3882819	7.8798	7.72556	7.62703	7.7025	7.67694	7.61614	7.63785	7.85006	8.3073	7.74413	7.66519	7.93174	-0.0789367	0.39938	0.398471	0.187606	0.449478	0.391601
AT1G11570	NTF2-like	1	chr1	3883280	3883956	7.00565	7.04568	7.19221	7.11835	7.1457	7.10317	7.08272	7.10706	6.96215	7.08118	7.12241	7.05065	0.0412268	0.54557	0.454926	-0.0305348	0.695468	0.474497
AT1G11572	Plant thionin family protein	1	chr1	3884356	3884952	5.41469	5.25848	5.29232	5.20564	5.58246	5.25867	5.53542	5.27311	5.09326	5.32183	5.34892	5.3006	0.0270941	0.84645	0.549488	-0.0212324	0.888216	0.529635
AT1G11580	methylesterase PCR A	1	chr1	3888690	3890811	13.7599	13.8437	13.9794	13.7443	13.772	13.7507	13.6308	13.7272	13.497	13.861	13.7557	13.6183	-0.105324	0.240027	0.325691	-0.242684	0.0586139	0.211438
AT1G11590	Plant invertase/pectin methylesterase inhibitor superfamily	1	chr1	3892580	3894677	5.10198	4.97364	4.73205	5.09422	4.69842	4.86228	5.34538	5.40431	5.00158	4.93589	4.88497	5.25043	-0.05092	0.76334	0.526078	0.314534	0.132405	0.253298
AT1G11592	other RNA	0	chr1	3895179	3896934	9.15008	9.02708	9.08237	9.1925	9.00946	9.0561	8.98191	8.97836	8.99279	9.08651	9.08602	8.98435	-0.000492782	0.994408	0.587794	-0.102161	0.100722	0.236322
AT1G11593	Plant invertase/pectin methylesterase inhibitor superfamily protein	1	chr1	3898002	3898609	5.61035	5.36822	5.3192	5.3925	5.25839	5.30028	5.26295	5.09779	5.50619	5.43259	5.31706	5.28898	-0.115531	0.331769	0.370099	-0.143612	0.393065	0.371044
AT1G11595		1	chr1	3898631	3899699	6.55371	6.33762	6.4304	6.36559	6.55231	6.41739	6.30388	6.25827	6.38001	6.44058	6.4451	6.31405	0.00451926	0.959589	0.579265	-0.126524	0.172092	0.274943
AT1G11600	cytochrome P450, family 77, subfamily B, polypeptide 1	1	chr1	3902012	3903782	6.34496	6.73139	6.73238	6.76549	6.74368	6.9004	6.85452	7.14436	6.62814	6.60291	6.80319	6.87567	0.200281	0.256963	0.334275	0.272763	0.24055	0.307563
AT1G11608	F-box associated ubiquitination effector family protein	1	chr1	3905579	3906818	5.37843	5.08585	5.41042	5.05319	4.97615	5.03345	4.95243	4.9637	4.62188	5.29157	5.02093	4.846	-0.27064	0.11367	0.25236	-0.445565	0.0434604	0.200964
AT1G11610	cytochrome P450, family 71, subfamily A, polypeptide 18	0	chr1	3906862	3909338	5.26116	5.52522	5.34695	5.48885	5.30516	5.36967	5.14297	5.47493	5.42695	5.37777	5.38789	5.34828	0.0101197	0.920537	0.569625	-0.0294906	0.83189	0.513783
AT1G11620	F-box and associated interaction domains-containing protein	1	chr1	3910833	3911924	5.14312	4.98542	5.25734	5.04616	4.82553	5.05651	4.8427	4.76017	4.86699	5.12863	4.97607	4.82329	-0.152558	0.234471	0.322774	-0.305341	0.045256	0.201572
AT1G11630	Tetratricopeptide repeat (TPR)-like superfamily protein	0	chr1	3912902	3914407	8.43905	8.39129	8.55037	8.5727	8.59454	8.58606	8.43541	8.46209	8.54037	8.46024	8.58443	8.47929	0.124195	0.116357	0.254139	0.0190515	0.756017	0.492884
AT1G11650	RNA-binding (RRM/RBD/RNP motifs) family protein	1	chr1	3914774	3918176	11.5997	11.7575	11.8032	11.8188	11.6533	11.785	11.8088	11.8644	11.9521	11.7202	11.7524	11.8751	0.0322346	0.70727	0.50867	0.154938	0.115381	0.243357
AT1G11655		1	chr1	3919272	3919774	10.8877	10.703	10.067	10.4809	10.5829	10.602	10.6057	10.5088	10.5278	10.5526	10.5553	10.5474	0.0027237	0.992301	0.587364	-0.00511506	0.985508	0.554731
AT1G11660	heat shock protein 70 (Hsp 70) family protein	1	chr1	3920543	3924555	9.92093	10.0257	10.0259	9.79759	9.79135	9.92149	9.93979	9.87228	9.82647	9.99085	9.83681	9.87952	-0.154042	0.0506268	0.200382	-0.111337	0.0814836	0.225778
AT1G11670	MATE efflux family protein	0	chr1	3928162	3931576	11.5175	11.7673	11.5322	11.5058	11.5862	11.6882	11.5117	11.4682	11.2698	11.6056	11.5934	11.4166	-0.0122637	0.906048	0.565831	-0.189099	0.161099	0.26986
AT1G11680	CYTOCHROME P450 51G1	1	chr1	3938501	3940754	13.8367	14.0323	14.0993	13.8342	13.7272	13.8594	13.7567	13.8875	13.5838	13.9894	13.8069	13.7427	-0.182464	0.131857	0.265471	-0.246726	0.105678	0.239613
AT1G11684		0	chr1	3941103	3941300	5.33791	5.24122	5.42558	5.27157	5.63408	5.31302	5.34465	5.55274	5.3137	5.3349	5.40622	5.4037	0.0713201	0.614049	0.478645	0.0687922	0.500508	0.409567
AT1G11690		1	chr1	3941469	3942212	4.9356	4.99782	5.01627	5.00982	5.19154	5.33795	5.06858	5.20824	5.14291	4.98323	5.17977	5.13991	0.196541	0.167698	0.287806	0.15668	0.0392166	0.197562
AT1G11700	Protein of unknown function, DUF584	1	chr1	3945737	3946613	12.2307	12.1552	12.0028	11.892	11.9084	11.7799	11.739	11.8073	11.9971	12.1296	11.8601	11.8478	-0.269447	0.0357697	0.182301	-0.281762	0.0521807	0.206305
AT1G11710	Pentatricopeptide repeat (PPR) superfamily protein	1	chr1	3948714	3951359	5.79985	5.80058	5.76437	5.754	6.0719	6.14753	5.69519	5.60295	6.01763	5.78827	5.99114	5.77193	0.202877	0.233619	0.322218	-0.0163394	0.908696	0.535229
AT1G11720	starch synthase 3	1	chr1	3951553	3957044	8.31015	8.60879	8.70794	8.40696	8.40071	8.51834	8.39778	8.35639	8.28529	8.54229	8.442	8.34649	-0.100293	0.495546	0.436762	-0.195809	0.238837	0.306812
AT1G11730	Galactosyltransferase family protein	1	chr1	3957473	3960113	7.13009	7.2179	7.24188	7.16552	7.05684	6.96463	6.98367	7.08043	6.75381	7.19662	7.06233	6.9393	-0.134293	0.133375	0.266606	-0.25732	0.104635	0.23909
AT1G11735	MIR171B; miRNA	0	chr1	3961348	3961464	5.23077	5.44818	5.55672	5.80623	5.99043	5.73377	5.65375	5.32398	5.63968	5.41189	5.84348	5.53914	0.431588	0.0264309	0.167618	0.127249	0.427786	0.383472
AT1G11740	ankyrin repeat family protein	0	chr1	3963054	3966824	9.073	9.00921	8.67139	8.89114	9.09294	9.02007	8.90997	8.97709	8.95597	8.91786	9.00138	8.94768	0.0835204	0.589419	0.470238	0.0298132	0.834258	0.514377
AT1G11750	CLP protease proteolytic subunit 6	1	chr1	3967476	3969877	6.17822	6.19841	6.2551	6.21518	6.29059	5.93919	5.99131	5.83813	6.12002	6.21057	6.14832	5.98315	-0.0622548	0.621957	0.481016	-0.227422	0.0985211	0.234813
AT1G11755	Undecaprenyl pyrophosphate synthetase family protein	0	chr1	3969681	3971840	9.10111	9.12973	9.17951	9.2434	9.24817	9.31804	9.20362	9.29667	9.20548	9.13679	9.26987	9.23525	0.133085	0.0162055	0.148371	0.0984671	0.0669204	0.217357
AT1G11760		0	chr1	3972032	3973286	9.36593	9.38849	9.45801	9.47784	9.50213	9.5911	9.34503	9.4749	9.36187	9.40414	9.52369	9.39393	0.119545	0.0564564	0.205995	-0.0102104	0.847334	0.518239
AT1G11765	Plant self-incompatibility protein S1 family	1	chr1	3973875	3974509	4.84957	5.07817	4.97229	4.9461	5.0358	4.71749	5.32404	5.32021	4.46138	4.96668	4.8998	5.03521	-0.0668817	0.597105	0.472811	0.06853	0.835743	0.51478
AT1G11770	FAD-binding Berberine family protein	1	chr1	3975679	3977379	5.02713	4.72757	4.91385	4.7827	5.05976	5.08547	4.99224	4.71023	4.81968	4.88952	4.97598	4.84072	0.0864597	0.544111	0.454604	-0.0488008	0.704797	0.477579
AT1G11780	oxidoreductase, 2OG-Fe(II) oxygenase family protein	0	chr1	3976839	3979195	5.3987	5.30485	5.48528	5.5714	5.18098	5.32395	5.1024	5.16533	5.16167	5.39628	5.35878	5.14313	-0.0375003	0.785682	0.532466	-0.253142	0.0272854	0.187915
AT1G11785		0	chr1	3979862	3980956	4.69989	4.81849	4.70289	4.64156	4.4596	4.57868	4.82445	4.81987	5.16727	4.74042	4.55995	4.9372	-0.180476	0.057721	0.207756	0.196772	0.223383	0.299587
AT1G11790	arogenate dehydratase 1	1	chr1	3981248	3985215	9.93431	10.0177	10.031	9.83487	9.76318	9.81927	10.0699	9.9686	9.92335	9.99431	9.80577	9.98728	-0.18854	0.00923467	0.130159	-0.00703163	0.901284	0.533436
AT1G11800	endonuclease/exonuclease/phosphatase family protein	0	chr1	3985225	3987290	7.00349	6.99034	6.97794	7.12585	7.10325	7.36634	7.38135	7.38752	7.41862	6.99059	7.19848	7.39583	0.207894	0.131161	0.264888	0.405241	3.18e-05	0.0449888
AT1G11803		0	chr1	3987755	3988030	6.35963	6.00235	6.23855	5.97293	5.90877	6.09975	6.12022	5.79348	5.94113	6.20017	5.99382	5.95161	-0.206359	0.179505	0.293787	-0.248565	0.153872	0.265457
AT1G11806		1	chr1	3988346	3989398	5.48995	5.26743	5.24117	5.06947	5.49176	5.18593	5.20965	5.21745	5.13907	5.33285	5.24905	5.18872	-0.0837973	0.608293	0.476716	-0.14413	0.202555	0.290455
AT1G11810	F-box associated ubiquitination effector family protein	1	chr1	3989763	3991066	6.24382	6.20486	6.53954	6.04927	5.91849	5.84083	6.01588	5.51711	5.92596	6.32941	5.9362	5.81965	-0.39321	0.0442901	0.192578	-0.509758	0.0594698	0.212368
AT1G11820	O-Glycosyl hydrolases family 17 protein	0	chr1	3991027	3993598	9.66785	9.63563	9.94822	9.70315	9.59389	9.67052	9.5915	9.65446	9.60142	9.75057	9.65585	9.6158	-0.0947157	0.445384	0.416937	-0.134772	0.306194	0.335884
AT1G11840	glyoxalase I homolog	1	chr1	3995169	3997907	11.2729	11.329	11.5217	11.2653	11.1694	11.184	11.5876	11.6039	11.3133	11.3745	11.2062	11.5016	-0.168307	0.142801	0.273051	0.12706	0.354496	0.355357
AT1G11850		1	chr1	3999199	3999876	4.70579	4.42705	4.7036	4.44726	4.63476	4.46653	4.58386	4.52133	4.56684	4.61215	4.51618	4.55734	-0.0959654	0.440232	0.414718	-0.0548067	0.616373	0.448429
AT_1_+_2_4000614-4000721		1	chr1	4000615	4000722	5.96805	5.72092	6.2032	5.66509	5.85924	5.47816	5.79781	5.95558	5.97341	5.96405	5.6675	5.90893	-0.296558	0.173812	0.290473	-0.0551193	0.740854	0.488172
AT1G11860	Glycine cleavage T-protein family	1	chr1	4001113	4003442	12.4574	12.5067	12.5181	12.4999	12.4811	12.4448	12.3885	12.5067	12.5045	12.4941	12.4753	12.4665	-0.0188298	0.488604	0.433714	-0.0275438	0.571516	0.433813
AT1G11870	Seryl-tRNA synthetase	1	chr1	4003846	4006739	8.86243	9.01673	8.89366	8.83245	8.87142	8.84636	8.9263	8.89417	8.8686	8.92427	8.85008	8.89636	-0.0741959	0.252664	0.332124	-0.0279169	0.622541	0.450542
AT1G11880	transferases, transferring hexosyl groups	0	chr1	4007705	4010433	7.79749	8.05188	8.11465	7.97668	8.09293	7.96525	8.11679	8.09082	7.93081	7.98801	8.01162	8.04614	0.0236103	0.838379	0.547273	0.0581339	0.63985	0.456641
AT1G11890	Synaptobrevin family protein	1	chr1	4010779	4013125	10.4627	10.6404	10.6378	10.4199	10.3682	10.5117	10.62	10.5244	10.5509	10.5803	10.4333	10.5651	-0.147023	0.118958	0.256444	-0.0151826	0.831749	0.513777
AT1G11900	Tetratricopeptide repeat (TPR)-like superfamily protein	0	chr1	4013121	4014681	7.44506	7.58158	7.69723	7.56937	7.47487	7.76669	7.56852	7.68027	7.7351	7.57462	7.60365	7.6613	0.0290232	0.809801	0.539353	0.0866731	0.386898	0.368913
AT1G11905	B-cell receptor-associated protein 31-like	1	chr1	4014847	4016540	10.1443	10.0732	10.1834	10.1051	9.92795	10.0466	10.0127	10.1952	9.96996	10.1336	10.0266	10.0593	-0.107051	0.169754	0.288787	-0.074354	0.405029	0.375783
AT1G11910	aspartic proteinase A1	0	chr1	4016784	4020983	10.53	10.632	10.4362	10.2808	10.703	10.7799	10.7682	10.8264	11.1032	10.5327	10.5879	10.8993	0.0551798	0.764075	0.526314	0.366564	0.0505544	0.205418
AT1G11915		1	chr1	4021825	4023292	5.81725	5.98174	6.1958	6.1255	5.96585	5.99227	6.12078	6.17566	5.92801	5.99827	6.02787	6.07482	0.0296082	0.822497	0.542928	0.0765509	0.599104	0.442637
AT1G11920	Pectin lyase-like superfamily protein	0	chr1	4023667	4025097	5.54939	5.5255	5.44201	5.55203	5.41306	5.69585	5.63833	6.1033	5.6328	5.50563	5.55365	5.79148	0.0480162	0.627873	0.482689	0.285845	0.204375	0.291118
AT1G11925	Stigma-specific Stig1 family protein	0	chr1	4025930	4026732	5.37896	4.81369	5.18776	5.20897	5.26614	5.43193	5.18559	5.49298	5.52046	5.1268	5.30235	5.39968	0.175545	0.407985	0.40174	0.272874	0.250722	0.312107
AT1G11930	Predicted pyridoxal phosphate-dependent enzyme, YBL036C type	1	chr1	4028692	4030584	10.9789	10.8983	10.9312	11.1021	11.3545	11.1599	10.9801	10.9948	11.2581	10.9361	11.2055	11.0776	0.269361	0.0611321	0.210721	0.141526	0.254156	0.313987
AT1G11940	Core-2/I-branching beta-1,6-N-acetylglucosaminyltransferase family protein	0	chr1	4031574	4034078	8.30018	8.30148	8.3507	8.19789	8.26282	8.25603	8.15785	8.16033	8.29588	8.31745	8.23891	8.20469	-0.0785414	0.0436081	0.19177	-0.112768	0.11929	0.245695
AT1G11950	Transcription factor jumonji (jmjC) domain-containing protein	0	chr1	4034587	4038758	6.83811	7.02189	7.06268	6.92617	7.01971	7.02146	6.83333	7.0581	6.90068	6.97422	6.98912	6.9307	0.0148913	0.857847	0.553151	-0.0435207	0.673681	0.467529
AT1G11960	ERD (early-responsive to dehydration stress) family protein	0	chr1	4039711	4043880	8.39366	8.37639	8.38643	8.36499	8.27057	8.39103	8.36943	8.37238	8.34892	8.38549	8.3422	8.36358	-0.0432949	0.358112	0.38134	-0.0219148	0.0784565	0.223506
AT1G11970	Ubiquitin-like superfamily protein	1	chr1	4044370	4044669	4.70057	4.93419	4.32181	4.7546	4.65713	5.02576	4.88496	4.21594	4.7715	4.65219	4.8125	4.62413	0.160305	0.495199	0.436653	-0.0280598	0.9232	0.53905
AT1G11980	ubiquitin-related protein 3	1	chr1	4045619	4045855	10.4973	10.4587	10.4278	10.6007	10.5703	10.5452	10.4971	10.6173	10.4742	10.4613	10.5721	10.5295	0.110795	0.0139686	0.143229	0.0682575	0.262078	0.317522
AT1G11990	O-fucosyltransferase family protein	0	chr1	4046246	4049060	5.0804	5.00146	4.85162	4.97283	5.33357	5.50335	5.10205	5.85917	5.16335	4.97782	5.26992	5.37486	0.292091	0.19426	0.301886	0.397032	0.239365	0.307102
AT1G12000	Phosphofructokinase family protein	0	chr1	4049896	4053835	6.63343	7.18783	7.09372	6.97094	6.81991	6.72117	6.86965	6.98244	6.90455	6.97166	6.83734	6.91888	-0.134319	0.52782	0.448606	-0.0527828	0.789047	0.501758
AT1G12010	2-oxoglutarate (2OG) and Fe(II)-dependent oxygenase superfamily protein	1	chr1	4056207	4057933	10.031	10.0778	10.5536	10.2919	10.5228	10.3817	10.2591	10.3626	10.5025	10.2208	10.3988	10.3748	0.17796	0.404795	0.400519	0.15395	0.464521	0.396538
AT1G12013	SNOR111; snoRNA	1	chr1	4058287	4058416	10.1463	10.037	9.7993	9.90987	10.1677	9.90495	10.4948	9.98726	10.0623	9.9942	9.99418	10.1814	-2.4e-05	0.999866	0.589119	0.187228	0.385303	0.368425
AT1G12015	snoRNA	1	chr1	4058487	4058576	11.1958	10.7682	10.5141	10.6729	11.0678	10.8023	11.3526	10.8259	10.9152	10.826	10.8477	11.0312	0.0216379	0.930704	0.571876	0.20518	0.470999	0.398743
Group369		0	chr1	4061398	4062115	9.19846	9.03937	9.05699	8.99985	8.92562	8.96214	8.10819	8.24587	8.29497	9.09827	8.96254	8.21634	-0.135735	0.0986024	0.241766	-0.881932	0.000321822	0.0778416
AT_1_-_2_4061698-4061799		0	chr1	4061700	4061801	9.70548	9.50476	9.49664	9.48482	9.44801	9.37158	8.95905	8.93589	8.92619	9.56896	9.4348	8.94038	-0.134158	0.178811	0.293545	-0.628583	0.0104188	0.169237
AT1G12020		0	chr1	4062462	4063337	6.48419	6.9941	6.5425	7.05054	6.74218	7.05575	6.87303	6.98182	6.95646	6.6736	6.94949	6.9371	0.275896	0.234886	0.322978	0.263507	0.240776	0.307647
AT1G12030	Protein of unknown function (DUF506)	0	chr1	4064667	4066341	5.1626	5.6052	5.71112	5.89034	5.1444	5.36676	5.48837	5.97153	5.47772	5.49297	5.46717	5.64588	-0.0258039	0.930736	0.571876	0.152902	0.549125	0.426428
AT_1_-_0_4068756-4069007		0	chr1	4068758	4069009	5.68039	5.34805	5.45859	5.63269	5.17114	4.93554	5.44806	5.28616	5.61823	5.49568	5.24646	5.45082	-0.249222	0.35559	0.380346	-0.0448626	0.759564	0.493855
AT1G12040	leucine-rich repeat/extensin 1	1	chr1	4070124	4072567	11.1141	11.231	10.8234	10.8293	10.8007	10.8922	11.0407	10.9732	10.7651	11.0562	10.8407	10.9264	-0.215489	0.213384	0.311905	-0.129833	0.432656	0.385314
AT1G12050	fumarylacetoacetase, putative	1	chr1	4072752	4076207	6.7805	6.853	6.89426	6.97991	6.8834	7.11806	6.90684	7.03364	6.72081	6.84259	6.99379	6.8871	0.151201	0.143035	0.273149	0.0445081	0.682096	0.470334
AT1G12060	BCL-2-associated athanogene 5	1	chr1	4076334	4076981	8.13103	8.25812	8.30574	8.30406	8.13631	8.14206	8.24197	8.24878	7.99908	8.23163	8.19414	8.16327	-0.0374885	0.646807	0.489243	-0.0683582	0.527497	0.419607
AT1G12064		0	chr1	4077498	4078095	5.29647	5.52831	5.35344	5.47262	5.65147	5.26726	5.57505	5.41598	7.48834	5.39274	5.46378	6.15979	0.0710472	0.621699	0.480936	0.767053	0.368344	0.361277
AT1G12070	Immunoglobulin E-set superfamily protein	0	chr1	4078913	4080106	6.39616	6.70235	6.56573	6.54633	6.47237	6.51893	6.23185	6.22156	6.14636	6.55475	6.51254	6.19992	-0.0422016	0.684574	0.501335	-0.354821	0.0470114	0.202866
AT_1_-_2_4081291-4081428		0	chr1	4081293	4081430	4.65202	5.03644	4.58529	4.80811	4.95028	4.47726	4.88153	4.88244	4.84449	4.75792	4.74522	4.86949	-0.0126952	0.952072	0.577216	0.111571	0.510968	0.41355
AT1G12080	Vacuolar calcium-binding protein-related	1	chr1	4084162	4085045	13.7507	13.721	13.6278	13.6622	13.6888	13.5915	13.2339	13.3676	13.1569	13.6999	13.6475	13.2528	-0.0523768	0.331234	0.369891	-0.447098	0.00639627	0.154428
AT_1_+_1_4088717-4088947		1	chr1	4088719	4088949	4.83219	4.85282	4.9306	4.83152	4.73257	4.42056	4.20648	4.55705	4.83555	4.87187	4.66155	4.53303	-0.210319	0.227492	0.319263	-0.338843	0.201052	0.289831
AT1G12090	extensin-like protein	0	chr1	4089847	4090725	14.166	14.2343	13.9824	13.708	13.7599	13.8235	14.0307	14.0197	13.4927	14.1275	13.7638	13.8477	-0.363739	0.0255507	0.166395	-0.27985	0.252245	0.312994
AT1G12100	Bifunctional inhibitor/lipid-transfer protein/seed storage 2S albumin superfamily protein	1	chr1	4095246	4095845	6.16556	6.1209	5.96904	6.08518	5.65664	5.86409	5.94644	5.74403	6.0641	6.08517	5.86864	5.91819	-0.216532	0.21664	0.313956	-0.166979	0.218556	0.297341
AT_1_+_2_4103274-4103387		1	chr1	4103276	4103389	6.00691	5.68921	6.08241	5.65616	5.99566	5.73397	5.60013	5.31904	5.74308	5.92618	5.79527	5.55408	-0.130912	0.455805	0.421413	-0.372095	0.0983567	0.234813
AT1G12110	nitrate transporter 1.1	1	chr1	4105233	4109545	11.7969	11.7525	11.7936	11.9047	11.8181	11.8195	11.8144	11.879	11.6772	11.781	11.8474	11.7902	0.0663991	0.131528	0.265189	0.00915437	0.893529	0.531005
AT1G12120	Plant protein of unknown function (DUF863)	0	chr1	4114771	4117594	11.4586	11.4616	11.5376	11.5068	11.4552	11.4839	11.4703	11.435	11.2535	11.4859	11.482	11.3863	-0.0039335	0.902975	0.565175	-0.0996159	0.273895	0.322555
AT1G12130	Flavin-binding monooxygenase family protein	1	chr1	4118594	4120871	5.43687	5.58514	5.50173	5.64676	5.77179	5.63379	5.48494	5.32633	5.37507	5.50791	5.68411	5.39545	0.176197	0.045648	0.194161	-0.112466	0.152176	0.26435
AT1G12140	flavin-monooxygenase glucosinolate S-oxygenase 5	1	chr1	4121369	4124595	10.7251	10.7263	10.7336	11.0092	11.0363	11.1688	11.1006	10.9781	11.0262	10.7283	11.0714	11.0349	0.34311	0.0197705	0.156146	0.306613	0.0128849	0.172691
AT1G12150	Plant protein of unknown function (DUF827)	0	chr1	4123530	4125648	8.40441	8.53018	8.33299	8.20309	8.28393	8.31737	8.43614	8.67099	8.50859	8.42253	8.26813	8.53857	-0.154393	0.0977368	0.241163	0.116048	0.270007	0.320714
AT1G12160	Flavin-binding monooxygenase family protein	1	chr1	4126066	4128310	7.9917	7.96791	8.07367	8.22149	8.28053	8.13936	8.20036	8.18414	8.13296	8.01109	8.21379	8.17249	0.2027	0.0195175	0.155727	0.161393	0.018627	0.180256
AT1G12170	F-box family protein	0	chr1	4128607	4129701	6.1472	6.015	6.33142	6.13735	5.58024	5.88979	5.84339	5.42024	5.71662	6.16454	5.86913	5.66008	-0.295408	0.20448	0.307403	-0.504457	0.035721	0.194774
AT1G12180		1	chr1	4130421	4131137	4.46468	4.26534	4.59513	4.59703	4.61393	4.55173	4.43474	4.18774	4.141	4.44172	4.58756	4.25449	0.145844	0.265593	0.338884	-0.187225	0.230075	0.302492
AT1G12190	F-box and associated interaction domains-containing protein	0	chr1	4132967	4134094	5.51857	5.10631	5.38733	4.9566	5.4958	5.28176	5.35306	5.40028	5.40194	5.3374	5.24472	5.3851	-0.0926822	0.666103	0.495649	0.047694	0.733753	0.486149
AT1G12200	Flavin-binding monooxygenase family protein	1	chr1	4137533	4140028	11.2861	11.374	11.3471	11.5244	11.5207	11.4749	11.3581	11.4374	11.3456	11.3357	11.5067	11.3803	0.170914	0.00855652	0.127269	0.0445918	0.314751	0.339419
OMAT1P004260		1	chr1	4140410	4140634	7.28119	7.00071	7.19233	7.11009	7.15959	7.16629	7.3568	7.02437	7.00612	7.15808	7.14532	7.1291	-0.0127518	0.893022	0.562896	-0.0289774	0.847955	0.518378
AT1G12210	RPS5-like 1	1	chr1	4140948	4143605	5.80213	5.91759	5.93641	6.30863	6.18918	5.87895	6.85573	5.93919	6.01172	5.88538	6.12559	6.26888	0.240209	0.194008	0.301747	0.383502	0.321597	0.342029
AT1G12211		0	chr1	4143866	4144114	4.59488	4.51318	4.48952	4.66406	4.89112	4.39296	4.33134	4.71068	4.90831	4.53253	4.64938	4.65011	0.116851	0.504745	0.440514	0.11758	0.561244	0.430559
AT1G12220	Disease resistance protein (CC-NBS-LRR class) family	1	chr1	4144572	4147911	7.60937	7.70904	7.55859	7.90838	7.8815	7.83815	7.75402	7.80984	7.84805	7.62566	7.87601	7.80397	0.250348	0.016574	0.149078	0.178307	0.0352386	0.194454
AT1G12230	Aldolase superfamily protein	1	chr1	4147962	4151056	8.69793	8.82868	8.9446	8.77936	8.72222	8.66876	8.77672	8.75115	8.5727	8.82374	8.72344	8.70019	-0.100294	0.295769	0.352968	-0.123549	0.267752	0.319876
AT1G12240	Glycosyl hydrolases family 32 protein	1	chr1	4153652	4157644	13.4482	13.3676	13.4567	13.2075	13.2411	13.2293	13.2293	13.2925	13.2893	13.4241	13.226	13.2704	-0.198175	0.0125545	0.140434	-0.153767	0.0145037	0.173956
AT1G12244	Polynucleotidyl transferase, ribonuclease H-like superfamily protein	1	chr1	4157654	4159046	7.17872	7.17134	7.25749	7.23966	7.24451	7.3231	7.18346	7.22876	7.25811	7.20251	7.26909	7.22344	0.0665794	0.15981	0.283506	0.0209286	0.58469	0.437694
AT1G12250	Pentapeptide repeat-containing protein	1	chr1	4159265	4161455	9.99976	9.86906	10.1245	9.9377	10.0565	9.8819	9.98488	10.0081	10.2031	9.99778	9.95869	10.0654	-0.0390937	0.688741	0.502642	0.0675846	0.540646	0.423705
AT1G12260	NAC 007	0	chr1	4162832	4165852	8.66801	8.7051	8.72837	8.83156	8.76871	8.787	8.48533	8.61226	8.73328	8.7005	8.79576	8.61029	0.0952635	0.02068	0.1579	-0.090203	0.334096	0.346903
AT_1_-_1_4169636-4169743		0	chr1	4169638	4169745	5.34867	5.12753	5.64012	5.24076	5.49429	5.20195	5.4652	6.57554	5.00363	5.37211	5.31233	5.68146	-0.0597734	0.752375	0.522433	0.30935	0.582372	0.436942
AT1G12270	stress-inducible protein, putative	1	chr1	4172075	4174775	10.3202	10.5658	10.6679	10.3817	10.2746	10.3642	10.3351	10.3571	10.2683	10.518	10.3402	10.3202	-0.177819	0.221094	0.315957	-0.197804	0.189445	0.284411
AT1G12280	LRR and NB-ARC domains-containing disease resistance protein	0	chr1	4174875	4177559	8.49657	8.39492	8.49094	8.47057	8.36227	8.43937	8.45049	8.49046	8.40857	8.46081	8.42407	8.44984	-0.0367408	0.470019	0.4263	-0.0109677	0.80165	0.505005
AT1G12290	Disease resistance protein (CC-NBS-LRR class) family	0	chr1	4178359	4182593	8.35602	8.33804	8.17349	8.43653	8.4199	8.54627	8.36137	8.42552	8.69345	8.28919	8.46757	8.49345	0.17838	0.0723989	0.221137	0.204262	0.174308	0.276485
AT1G12294	MIR472a; miRNA	0	chr1	4182132	4182299	5.24635	5.30013	5.12281	5.20533	5.11675	5.37309	5.33679	5.21734	5.18103	5.2231	5.23172	5.24506	0.00862841	0.930053	0.57165	0.0219615	0.771122	0.497017
AT1G12300	Tetratricopeptide repeat (TPR)-like superfamily protein	0	chr1	4183066	4186124	7.68675	7.72444	7.97696	7.73385	7.6907	7.63464	7.45187	7.56419	7.38677	7.79605	7.68639	7.46761	-0.109656	0.352728	0.378935	-0.328442	0.0481524	0.203411
AT1G12310	Calcium-binding EF-hand family protein	0	chr1	4187165	4188056	9.95716	10.0143	9.95912	9.93295	9.91511	9.8945	9.89954	9.94576	9.87752	9.97687	9.91418	9.90761	-0.0626846	0.0578137	0.207791	-0.0692621	0.0656623	0.216566
AT1G12320	Protein of unknown function (DUF1442)	1	chr1	4189355	4190342	8.981	8.85638	9.05386	9.29467	9.30968	9.25018	8.54257	8.68154	8.83997	8.96374	9.28484	8.68803	0.321098	0.0227614	0.161381	-0.275715	0.0646028	0.215703
AT_1_+_1_4191407-4191538		1	chr1	4191409	4191540	5.1352	5.27661	5.13813	4.90131	5.21054	4.80848	4.90165	5.0104	4.76047	5.18332	4.97345	4.89084	-0.209869	0.219919	0.315256	-0.292474	0.034873	0.194203
AT_1_+_2_4192224-4192391		1	chr1	4192226	4192393	4.90007	4.98542	4.85984	4.78479	5.45236	4.80439	4.65674	4.82842	4.77065	4.91511	5.01385	4.75194	0.0987341	0.698455	0.50565	-0.163175	0.0649454	0.215909
AT1G12330		1	chr1	4194658	4196749	6.63944	7.0435	6.7853	7.04681	7.01621	7.02962	7.14714	7.11925	7.35783	6.82275	7.03088	7.20807	0.208135	0.219615	0.315161	0.385327	0.0615943	0.21364
AT1G12340	Cornichon family protein	1	chr1	4197396	4198310	9.55591	9.39285	9.2987	9.47938	9.62303	9.48597	9.54301	9.52955	9.47391	9.41582	9.52946	9.51549	0.113644	0.280846	0.346701	0.0996714	0.314682	0.339387
AT1G12350	4-phospho-panto-thenoylcysteine synthetase	1	chr1	4198413	4200802	9.52022	9.50121	9.46787	9.45652	9.55397	9.62709	9.70338	9.56934	9.63779	9.49643	9.54586	9.63684	0.0494263	0.425963	0.409174	0.140403	0.053195	0.206785
AT1G12360	Sec1/munc18-like (SM) proteins superfamily	1	chr1	4200876	4206404	10.8227	10.7757	10.75	10.8337	10.7932	10.8523	10.7899	10.8208	10.8351	10.7828	10.8264	10.8153	0.0435896	0.191053	0.300183	0.0324736	0.277754	0.324311
AT1G12370	photolyase 1	0	chr1	4206374	4208951	8.46793	8.55774	8.65963	8.57388	8.506	8.49869	8.7943	8.92545	8.70423	8.56177	8.52619	8.80799	-0.0355773	0.600711	0.474252	0.246224	0.0451198	0.201569
AT1G12380		0	chr1	4214262	4217132	8.87556	8.93903	9.00972	8.90404	8.76773	8.83065	8.82643	8.88409	8.62255	8.94144	8.83414	8.77769	-0.107296	0.124108	0.260038	-0.163748	0.16376	0.271508
AT1G12390	Cornichon family protein	1	chr1	4220100	4221774	9.57096	9.49283	9.4449	9.61205	9.64684	9.66483	9.67769	9.64417	9.70156	9.5029	9.64124	9.67447	0.138343	0.04775	0.196987	0.171578	0.0275304	0.188342
AT1G12400	Nucleotide excision repair, TFIIH, subunit TTDA	1	chr1	4221863	4222837	9.74721	9.73997	9.68927	9.92093	9.90843	9.88304	9.80535	9.81579	9.86855	9.72548	9.90413	9.8299	0.178652	0.00244821	0.101089	0.104416	0.0176281	0.178355
AT1G12410	CLP protease proteolytic subunit 2	1	chr1	4223030	4225124	8.01166	8.18144	8.11991	8.34822	8.3335	8.39912	8.24713	8.38208	8.52769	8.10434	8.36028	8.38564	0.255944	0.0233217	0.161971	0.281299	0.0525021	0.206403
AT1G12411		0	chr1	4225321	4225482	5.86733	5.75282	5.77043	5.52465	5.71505	6.12733	5.9029	5.40999	5.57005	5.79686	5.78901	5.62765	-0.00785005	0.969153	0.581749	-0.169212	0.364211	0.359596
AT1G12420	ACT domain repeat 8	0	chr1	4226362	4229138	8.95175	9.13061	9.12733	8.64197	8.61014	8.62255	8.76929	8.78726	8.7973	9.0699	8.62488	8.78462	-0.44501	0.0153736	0.146691	-0.28528	0.0380988	0.196849
AT_1_-_1_4229690-4229824		0	chr1	4229692	4229826	7.69009	7.38652	7.80912	7.1749	7.45917	7.69165	7.59465	7.49833	7.11283	7.62858	7.44191	7.40194	-0.18667	0.394828	0.396839	-0.226637	0.308274	0.336798
AT1G12423		0	chr1	4231027	4231146	6.00365	5.58998	5.62375	5.53024	5.59449	5.66832	5.51618	5.86954	5.56793	5.73913	5.59768	5.65122	-0.141441	0.400234	0.398973	-0.0879088	0.637845	0.456156
AT1G12430	armadillo repeat kinesin 3	0	chr1	4233873	4238764	7.765	7.91018	7.894	8.12906	7.88868	7.88105	7.66167	7.88172	7.91472	7.85639	7.96626	7.81937	0.109869	0.320903	0.365147	-0.0370208	0.712023	0.479677
CUFF.6021		0	chr1	4240633	4241138	5.0101	4.64974	4.84332	4.9166	4.95753	4.91036	5.22161	5.23577	5.12762	4.83438	4.92816	5.195	0.0937781	0.463481	0.424326	0.360615	0.0624572	0.214448
AT1G12440	A20/AN1-like zinc finger family protein	0	chr1	4241592	4243008	13.2849	13.2731	13.1455	13.4038	13.442	13.3423	13.1617	13.2849	13.4156	13.2345	13.3961	13.2874	0.161561	0.0471151	0.195809	0.0529149	0.577449	0.435541
AT1G12450	SNARE associated Golgi protein family	1	chr1	4244308	4245993	8.19405	8.21466	8.08073	8.48295	8.21374	8.37051	8.36359	8.44731	8.42627	8.16315	8.35573	8.41239	0.192587	0.116151	0.254113	0.249244	0.0114563	0.170854
AT1G12451		0	chr1	4246109	4246291	6.48297	6.1301	6.43833	6.05226	6.15296	6.33343	6.78925	6.09682	5.98955	6.35047	6.17955	6.29188	-0.170916	0.288793	0.349819	-0.0585903	0.845546	0.517613
AT1G12460	Leucine-rich repeat protein kinase family protein	1	chr1	4247249	4250630	8.3576	8.43766	8.45492	8.3317	8.27769	8.45858	8.19716	8.36892	8.28415	8.41673	8.35599	8.28341	-0.0607382	0.392708	0.395899	-0.133318	0.0971467	0.234631
AT1G12470	zinc ion binding	1	chr1	4251032	4257392	9.81866	9.91113	9.89985	9.91703	9.84255	9.82971	9.84075	9.88429	9.74289	9.87655	9.8631	9.82264	-0.0134492	0.752882	0.522558	-0.0539028	0.356383	0.356097
AT1G12480	C4-dicarboxylate transporter/malic acid transport protein	0	chr1	4257268	4259300	5.29553	5.53603	5.26385	5.56149	5.42315	5.66092	5.34127	5.51957	5.81103	5.36514	5.54852	5.55729	0.183384	0.174689	0.29104	0.192151	0.311649	0.338087
AT1G12490	F-box associated ubiquitination effector family protein	1	chr1	4260783	4261869	5.24801	5.65792	5.58259	5.35305	5.38619	5.35901	5.40538	5.10105	5.3327	5.49617	5.36608	5.27971	-0.13009	0.410331	0.402758	-0.216465	0.243456	0.308929
AT1G12500	Nucleotide-sugar transporter family protein	0	chr1	4263150	4265044	9.76134	9.80976	9.84997	9.78361	9.74909	9.80562	9.74782	9.76634	9.68674	9.80702	9.77944	9.73363	-0.0275822	0.424413	0.40843	-0.073389	0.105295	0.239348
AT1G12520	copper chaperone for SOD1	0	chr1	4267106	4268926	8.70947	8.49438	8.54851	8.69307	8.67048	8.75668	8.54919	8.69987	8.67868	8.58412	8.70674	8.64258	0.122626	0.18916	0.299049	0.0584638	0.508649	0.412789
AT1G12530		0	chr1	4268986	4270787	11.9827	11.8316	11.8553	11.9439	11.9238	12.0048	11.8869	11.9332	11.9382	11.8899	11.9575	11.9195	0.0676331	0.29071	0.350756	0.0296027	0.60134	0.443429
AT1G12540	basic helix-loop-helix (bHLH) DNA-binding superfamily protein	1	chr1	4272960	4274206	4.20161	4.59414	4.26238	4.31312	4.69275	4.45906	4.41735	4.27045	4.41726	4.35271	4.48831	4.36835	0.1356	0.456832	0.421748	0.0156427	0.913769	0.536598
AT1G12550	D-isomer specific 2-hydroxyacid dehydrogenase family protein	1	chr1	4274594	4275981	8.44602	8.27503	8.31134	8.34739	8.22897	8.37424	8.4033	8.30949	8.3921	8.34413	8.31687	8.3683	-0.0272626	0.711546	0.509815	0.0241687	0.711981	0.479677
AT1G12560	expansin A7	1	chr1	4276519	4277899	12.4424	12.5614	12.2493	12.174	12.212	12.2449	12.1928	12.2625	11.9916	12.4177	12.2103	12.149	-0.207409	0.144312	0.273705	-0.26871	0.0931326	0.232649
AT1G12570	Glucose-methanol-choline (GMC) oxidoreductase family protein	0	chr1	4277993	4280862	5.81182	4.94947	5.18027	5.30759	5.43193	5.18138	5.46171	5.4762	5.19829	5.31385	5.30697	5.37873	-0.00688594	0.981529	0.584734	0.0648818	0.830422	0.513507
AT1G12580	phosphoenolpyruvate carboxylase-related kinase 1	1	chr1	4282899	4285829	10.0912	10.1501	10.18	10.1463	10.0724	10.1382	10.1632	10.1682	10.0663	10.1404	10.119	10.1326	-0.0214608	0.57371	0.464863	-0.00785222	0.861936	0.522279
AT1G12600	UDP-N-acetylglucosamine (UAA) transporter family	0	chr1	4286204	4288878	5.55094	5.61921	5.4434	5.54687	5.78035	5.86576	5.52458	5.79202	5.71276	5.53785	5.73099	5.67645	0.193146	0.170218	0.28884	0.138606	0.227443	0.301659
AT1G12610	Integrase-type DNA-binding superfamily protein	0	chr1	4289944	4291017	4.49677	4.69878	4.81891	4.74837	4.8493	4.91773	4.44126	4.67065	5.02671	4.67148	4.83847	4.71287	0.166982	0.212977	0.311652	0.041387	0.844689	0.517357
AT1G12620	Pentatricopeptide repeat (PPR) superfamily protein	0	chr1	4294594	4297084	7.06666	6.89039	6.99705	6.78994	6.77692	6.99236	6.93	6.61534	6.65832	6.9847	6.85307	6.73455	-0.131625	0.209145	0.310218	-0.250146	0.109409	0.241287
AT1G12630	Integrase-type DNA-binding superfamily protein	1	chr1	4298889	4299475	5.09503	5.24327	5.08079	5.29019	4.93085	5.08568	5.38233	5.7235	5.74904	5.1397	5.10224	5.61829	-0.037454	0.768982	0.527975	0.478595	0.0396149	0.198206
AT_1_-_1_4302356-4302469		0	chr1	4302358	4302471	5.26778	5.54575	5.60257	5.5893	5.32159	5.31539	5.11055	5.08974	4.88709	5.47203	5.40876	5.02913	-0.0632735	0.669261	0.496854	-0.442905	0.0295649	0.189509
AT1G12640	MBOAT (membrane bound O-acyl transferase) family protein	0	chr1	4303312	4305798	10.0786	10.0971	10.0288	10.078	10.1329	10.0985	10.2062	10.2509	10.2551	10.0682	10.1031	10.2374	0.0349622	0.252428	0.332029	0.169194	0.00344609	0.13414
AT1G12650		1	chr1	4305933	4308005	10.5741	10.687	10.7856	10.67	10.6904	10.672	10.5922	10.7202	10.5263	10.6822	10.6775	10.6129	-0.00476605	0.945101	0.575614	-0.0693201	0.453318	0.392882
AT1G12660		1	chr1	4308943	4309583	5.51438	5.35027	5.6797	5.37581	5.1708	5.7989	5.08168	5.28401	5.40738	5.51478	5.44851	5.25769	-0.0662774	0.770906	0.528577	-0.257094	0.128268	0.251227
AT1G12663		1	chr1	4310969	4311457	5.21947	5.03685	5.15561	5.34473	5.20759	4.88703	5.25211	5.02639	5.00263	5.13731	5.14645	5.09371	0.00913827	0.954507	0.577782	-0.0436059	0.675815	0.468302
AT1G12665		1	chr1	4312331	4312935	4.93055	4.99228	5.00046	4.67211	4.85976	5.10147	5.07289	4.90864	4.86191	4.97443	4.87778	4.94781	-0.0966486	0.519716	0.445681	-0.0266157	0.725542	0.483677
AT1G12667		1	chr1	4313858	4314204	4.63553	4.66945	4.50108	4.56431	4.48917	4.99082	5.09743	4.59243	4.90029	4.60202	4.68143	4.86338	0.0794119	0.669273	0.496854	0.261363	0.210391	0.293748
AT1G12669		1	chr1	4315466	4315987	6.18039	6.20502	6.33301	6.14522	6.27603	6.57498	5.89823	5.53877	5.90305	6.23947	6.33207	5.78002	0.0926005	0.551906	0.457024	-0.459455	0.04786	0.203411
AT1G12670		1	chr1	4316701	4317005	5.75764	5.74795	5.67351	5.94232	5.71016	5.71144	5.8313	5.4326	5.87981	5.72636	5.78798	5.71457	0.0616114	0.515807	0.444499	-0.0117945	0.941803	0.544228
AT1G12672		1	chr1	4318309	4319090	5.24595	5.19663	5.20609	5.24223	5.36974	5.65047	5.16842	5.15327	5.31617	5.21623	5.42081	5.21262	0.204588	0.230525	0.320457	-0.00360502	0.952156	0.546602
AT1G12680	phosphoenolpyruvate carboxylase-related kinase 2	0	chr1	4319886	4322945	9.02393	9.03987	9.03946	9.08171	9.15363	9.16435	9.02413	9.09846	9.11257	9.03442	9.13323	9.07839	0.0988084	0.0574005	0.207515	0.0439686	0.247742	0.310669
AT1G12700	ATP binding;nucleic acid binding;helicases	0	chr1	4323556	4326333	7.38584	7.52812	7.6447	7.29111	7.4318	7.44862	7.30231	7.43307	7.26278	7.51956	7.39051	7.33272	-0.129047	0.234763	0.322932	-0.186838	0.117752	0.244761
AT1G12710	phloem protein 2-A12	0	chr1	4326739	4328481	9.12277	9.18559	9.00153	9.04977	9.20743	9.21439	9.09517	9.00353	8.9891	9.1033	9.1572	9.02927	0.0539016	0.518398	0.445449	-0.0740247	0.319953	0.341253
AT1G12720	transposable element gene	1	chr1	4331062	4333220	5.43821	5.71606	5.64781	5.80156	5.76242	5.66182	5.89499	5.90474	5.29116	5.60069	5.74193	5.69696	0.141242	0.229594	0.320125	0.0962716	0.694053	0.473939
AT1G12725	transposable element gene	0	chr1	4333383	4334033	5.29273	5.12549	5.20443	5.44104	5.49261	5.17661	5.4859	5.48643	5.41498	5.20755	5.37009	5.46244	0.162535	0.235617	0.323274	0.254889	0.0190741	0.180534
AT1G12730	GPI transamidase subunit PIG-U	1	chr1	4334615	4337844	7.25139	7.45214	7.47509	7.55727	7.31253	7.58355	7.3099	7.30467	7.3308	7.39287	7.48445	7.31512	0.0915743	0.460241	0.42293	-0.0777495	0.38805	0.369191
CUFF.6153		1	chr1	4339058	4339741	5.7969	5.52501	5.7074	5.8055	5.84604	5.54784	5.7401	5.36395	5.70844	5.67644	5.73313	5.60416	0.0566923	0.669245	0.496854	-0.0722728	0.647149	0.459025
AT1G12740	cytochrome P450, family 87, subfamily A, polypeptide 2	1	chr1	4342282	4344857	8.17246	8.39705	8.13836	8.20122	8.15465	8.32129	8.29992	8.21366	8.14892	8.23596	8.22572	8.22083	-0.0102376	0.920486	0.56961	-0.0151244	0.879879	0.527147
AT1G12750	RHOMBOID-like protein 6	0	chr1	4344985	4348328	10.4438	10.3455	10.2851	10.349	10.3231	10.322	10.2726	10.3114	10.2913	10.3581	10.3314	10.2918	-0.0267642	0.623712	0.481483	-0.0663578	0.285776	0.327836
AT1G12760	Zinc finger, C3HC4 type (RING finger) family protein	1	chr1	4348498	4350867	7.3991	7.86458	7.52059	7.68976	7.76786	7.57403	7.88081	7.97296	7.93791	7.59476	7.67722	7.93056	0.0824627	0.626336	0.482161	0.335805	0.132982	0.253546
AT1G12770	P-loop containing nucleoside triphosphate hydrolases superfamily protein	1	chr1	4351064	4353685	5.98417	6.13495	6.25601	6.00522	6.15385	6.21999	6.21882	6.36359	6.3779	6.12504	6.12635	6.3201	0.00131205	0.99029	0.586844	0.195061	0.117283	0.24432
AT1G12775	Pentatricopeptide repeat (PPR) superfamily protein	1	chr1	4353906	4355929	6.62129	6.84578	6.68461	6.55928	6.7264	6.84389	6.71353	6.58445	6.61395	6.71723	6.70986	6.63731	-0.00736719	0.948176	0.576339	-0.0799154	0.372992	0.363252
AT1G12780	UDP-D-glucose/UDP-D-galactose 4-epimerase 1	0	chr1	4355926	4358328	10.0523	10.0074	10.2181	10.523	10.5202	10.4718	10.5426	10.4687	10.7171	10.0926	10.505	10.5761	0.412389	0.0180958	0.152924	0.483541	0.00813027	0.160891
AT1G12790		0	chr1	4359151	4361272	5.86748	6.00522	5.97941	6.14748	6.11163	6.29269	6.10752	6.19775	6.27778	5.9507	6.18393	6.19435	0.233229	0.031668	0.177164	0.243647	0.0206383	0.182364
AT1G12800	Nucleic acid-binding, OB-fold-like protein	0	chr1	4361551	4365331	5.78711	5.6357	5.70956	5.67963	5.77731	5.77973	5.57789	5.49121	5.61991	5.71079	5.74556	5.563	0.0347643	0.562416	0.460755	-0.147791	0.0642157	0.21547
AT1G12805	nucleotide binding	1	chr1	4366597	4367119	6.12256	6.0494	5.84104	6.57531	5.98417	6.1078	5.75881	5.57005	5.50268	6.00434	6.22242	5.61051	0.218089	0.356885	0.380726	-0.393823	0.0262961	0.187915
AT1G12810	proline-rich family protein	1	chr1	4367256	4368822	12.0907	11.9191	11.7886	12.1648	12.1689	12.1867	12.0907	12.1147	12.1559	11.9328	12.1734	12.1204	0.240649	0.109758	0.250069	0.187648	0.1599	0.269204
AT1G12820	auxin signaling F-box 3	0	chr1	4368760	4371293	11.2082	11.2551	11.3213	11.2144	11.1773	11.2405	11.3785	11.3133	11.1006	11.2615	11.2107	11.2641	-0.0508118	0.265482	0.338831	0.00260572	0.978999	0.553317
AT1G12830		0	chr1	4374250	4375170	10.377	10.5196	10.7323	10.5196	10.5141	10.5506	10.2775	10.4049	10.348	10.543	10.5281	10.3435	-0.0149066	0.898749	0.564325	-0.199518	0.184302	0.281307
AT1G12840	vacuolar ATP synthase subunit C (VATC) / V-ATPase C subunit / vacuolar proton pump C subunit (DET3)	1	chr1	4375515	4378514	13.2075	13.2893	13.1873	13.2293	13.2428	13.1743	13.2622	13.2642	13.3525	13.2281	13.2155	13.293	-0.0125827	0.756817	0.523954	0.0649312	0.206686	0.292301
AT1G12845		0	chr1	4378939	4379516	9.19183	9.01929	8.93711	9.13872	9.0819	9.21418	9.20791	9.23611	9.15291	9.04941	9.14494	9.19898	0.0955263	0.339962	0.373646	0.14957	0.176084	0.276897
AT1G12850	Phosphoglycerate mutase family protein	0	chr1	4379707	4381612	11.2558	11.1014	11.1649	11.1976	11.161	11.2072	11.2181	11.2976	11.3222	11.174	11.1886	11.2793	0.014562	0.781613	0.531373	0.105262	0.135103	0.254846
AT1G12855	F-box family protein	1	chr1	4382160	4383611	5.24417	4.98492	4.7413	4.76645	4.71257	4.96027	4.72231	4.90379	4.9494	4.99013	4.8131	4.8585	-0.177034	0.358179	0.381376	-0.131629	0.475772	0.400524
AT1G12860	basic helix-loop-helix (bHLH) DNA-binding superfamily protein	1	chr1	4384353	4386610	5.66494	5.93766	5.68917	5.58279	5.48768	5.61294	5.55884	5.66564	5.66357	5.76392	5.56114	5.62935	-0.202786	0.131473	0.265165	-0.134574	0.25937	0.316378
AT1G12870	F-box and associated interaction domains-containing protein	0	chr1	4387129	4389110	6.24269	5.62967	5.62529	5.3326	5.6068	5.72196	5.48471	5.62232	5.37838	5.83255	5.55379	5.49514	-0.278759	0.317801	0.363841	-0.337411	0.236476	0.305647
AT1G12880	nudix hydrolase homolog 12	1	chr1	4389751	4391151	8.15738	8.15385	8.06625	8.35185	8.37573	8.39336	8.18534	8.09551	7.93289	8.12583	8.37365	8.07125	0.247822	0.00706335	0.122153	-0.054577	0.548661	0.426315
AT1G12890	Integrase-type DNA-binding superfamily protein	1	chr1	4391734	4392393	5.81859	5.51009	6.05434	6.02935	5.82973	5.95011	5.69194	5.90408	5.96645	5.79434	5.93639	5.85415	0.142055	0.469978	0.426282	0.0598143	0.758937	0.493753
AT1G12900	glyceraldehyde 3-phosphate dehydrogenase A subunit 2	0	chr1	4392450	4394400	5.94423	5.96496	6.43381	5.86753	5.98248	5.90856	6.27233	6.05958	6.30695	6.11433	5.91953	6.21295	-0.194808	0.346789	0.37652	0.0986189	0.618756	0.449182
AT1G12910	Transducin/WD40 repeat-like superfamily protein	0	chr1	4394897	4396291	7.34483	7.52605	7.42412	7.15534	7.3835	7.21147	7.12517	7.22044	7.1239	7.43167	7.2501	7.15651	-0.181563	0.108208	0.248994	-0.275162	0.0168299	0.177501
AT1G12920	eukaryotic release factor 1-2	0	chr1	4396348	4398193	11.4518	11.4944	11.7022	11.4974	11.4539	11.592	11.4084	11.4669	11.3374	11.5494	11.5145	11.4043	-0.0349913	0.715549	0.510982	-0.14519	0.193205	0.28651
AT1G12930	ARM repeat superfamily protein	0	chr1	4398375	4405605	8.1181	8.29354	8.21924	8.12736	8.22477	8.26199	8.24435	8.25281	8.23008	8.2103	8.20471	8.24242	-0.0055881	0.935612	0.573284	0.0321189	0.593159	0.440463
AT1G12935	transposable element gene	0	chr1	4406318	4406746	6.86941	6.66992	6.7036	6.35176	6.41115	6.62755	6.42492	6.20201	6.30164	6.74764	6.46349	6.30952	-0.284158	0.0574705	0.20754	-0.438118	0.00801998	0.160555
AT1G12938		1	chr1	4412887	4413057	5.40075	5.38675	4.95265	5.45018	5.05036	5.34058	5.04094	5.22835	4.51538	5.24672	5.28037	4.92822	0.0336573	0.867921	0.5559	-0.318492	0.29429	0.330944
AT1G12940	nitrate transporter2.5	1	chr1	4416405	4418590	5.02351	4.77545	4.8836	4.71629	4.63288	4.49671	4.9275	4.77178	4.96953	4.89419	4.61529	4.8896	-0.278892	0.0448389	0.193189	-0.00458182	0.9634	0.549208
AT_1_-_1_4419062-4419154		0	chr1	4419064	4419156	5.10667	4.63444	4.86312	4.70929	5.28113	5.22061	5.44668	4.83785	5.01675	4.86808	5.07035	5.10043	0.202266	0.42669	0.409573	0.232349	0.366687	0.360512
AT1G12950	root hair specific 2	1	chr1	4419770	4422638	9.13517	9.27561	8.94982	8.94426	9.00153	9.08778	9.16206	9.16999	8.9677	9.1202	9.01119	9.09992	-0.109013	0.374396	0.387863	-0.0202849	0.869747	0.52467
AT1G12960	Ribosomal protein L18e/L15 superfamily protein	0	chr1	4422707	4423155	11.4457	11.4064	11.5148	11.1331	11.1604	11.1251	11.2007	11.3182	11.7374	11.4557	11.1395	11.4188	-0.316151	0.0054961	0.115824	-0.0368756	0.843484	0.516969
AT1G12970	plant intracellular ras group-related LRR 3	1	chr1	4423640	4425789	8.71839	8.74483	8.67479	8.86265	8.79216	8.79102	8.97894	8.78143	8.8123	8.71267	8.81528	8.85756	0.102609	0.0314492	0.176751	0.144888	0.131182	0.252808
AT1G12980	Integrase-type DNA-binding superfamily protein	1	chr1	4429718	4430965	4.89489	4.91365	4.93155	4.72436	4.8019	5.07455	4.89433	4.65448	4.85802	4.91336	4.86694	4.80227	-0.0464268	0.705247	0.5079	-0.111089	0.273912	0.322555
AT1G12990	beta-1,4-N-acetylglucosaminyltransferase family protein	1	chr1	4433640	4436075	8.72414	8.80499	8.84518	8.59284	8.54473	8.72969	8.58572	8.63994	8.71394	8.79144	8.62242	8.64653	-0.169016	0.0727856	0.22144	-0.144903	0.0481208	0.203411
AT1G13000	Protein of unknown function (DUF707)	0	chr1	4436105	4439476	9.99091	10.1136	10.1465	10.0812	10.1114	10.2316	10.1091	9.98797	9.92383	10.0837	10.1414	10.007	0.0577229	0.430873	0.411229	-0.076704	0.348122	0.353291
AT1G13020	eukaryotic initiation factor 4B2	0	chr1	4440544	4443684	10.0304	10.3445	10.1704	9.8865	9.8537	10.0174	10.0549	10.0858	9.75955	10.1818	9.91921	9.96675	-0.26257	0.0823058	0.22908	-0.215027	0.195659	0.287935
AT1G13030	sphere organelles protein-related	0	chr1	4444043	4447406	7.29283	7.59682	7.66259	7.45277	7.31396	7.36718	7.47884	7.55241	7.31259	7.51741	7.37797	7.44795	-0.139446	0.346995	0.376588	-0.0694666	0.636914	0.455791
AT1G13040	Pentatricopeptide repeat (PPR-like) superfamily protein	1	chr1	4447647	4449200	6.07387	6.17787	6.41561	5.99962	6.0204	6.08836	7.11372	5.87537	5.95935	6.22245	6.03613	6.31615	-0.186323	0.201215	0.305721	0.0936956	0.83913	0.515653
AT_1_-_0_4449591-4449707		0	chr1	4449593	4449709	4.40508	4.44116	4.23233	4.43278	4.17781	4.08229	4.11175	4.27857	4.69105	4.35952	4.23096	4.36046	-0.12856	0.36539	0.384344	0.000932805	0.996322	0.557179
AT1G13050		1	chr1	4450238	4451742	7.31369	7.55029	7.6691	7.49721	7.3977	7.47119	7.31243	7.33715	7.14246	7.51103	7.45537	7.26402	-0.0556592	0.652993	0.491483	-0.247009	0.127533	0.250896
AT1G13060	20S proteasome beta subunit E1	1	chr1	4452212	4454876	12.9144	13.1128	13.1852	12.974	12.9433	13.0262	13.095	13.1177	12.7343	13.0708	12.9812	12.9823	-0.0896234	0.385254	0.392895	-0.0884534	0.587728	0.43876
AT1G13070		1	chr1	4455477	4457099	5.44802	5.38331	5.35648	5.20695	5.48321	5.37006	5.02086	4.98284	5.09069	5.39594	5.3534	5.03146	-0.0425336	0.656933	0.492459	-0.364474	0.00103884	0.103085
AT1G13080	cytochrome P450, family 71, subfamily B, polypeptide 2	1	chr1	4459166	4460940	10.4809	10.4137	10.1313	10.7612	10.8201	10.7151	10.6227	10.522	10.6729	10.342	10.7655	10.6059	0.423496	0.0493892	0.198781	0.263913	0.118275	0.245093
AT1G13090	cytochrome P450, family 71, subfamily B, polypeptide 28	1	chr1	4461806	4463543	10.2894	10.2015	10.2161	10.1665	10.1548	10.1783	10.2053	10.2274	10.3081	10.2357	10.1665	10.2469	-0.0691551	0.118723	0.256291	0.0112202	0.800125	0.504648
AT1G13100	cytochrome P450, family 71, subfamily B, polypeptide 29	1	chr1	4463924	4465538	9.33915	9.37613	9.06112	9.3407	9.264	9.17217	9.60345	9.53036	9.5789	9.2588	9.25896	9.5709	0.000158054	0.998953	0.588981	0.312106	0.0821443	0.226363
AT1G13110	cytochrome P450, family 71 subfamily B, polypeptide 7	1	chr1	4467220	4469033	11.2465	11.3222	11.0515	11.1751	11.2628	11.2116	11.5298	11.5443	11.6069	11.2067	11.2165	11.5603	0.00973198	0.91734	0.568809	0.353576	0.0393335	0.197643
AT1G13120	embryo defective 1745	0	chr1	4469181	4473213	8.22391	8.25784	8.23413	8.15058	8.11441	8.31088	8.31607	8.33689	8.32786	8.23863	8.19196	8.32694	-0.0466693	0.521756	0.446079	0.0883134	0.00355605	0.134986
AT1G13130	Cellulase (glycosyl hydrolase family 5) protein	1	chr1	4474720	4477941	6.51682	6.79954	6.73993	6.92401	6.70929	6.8205	6.41018	6.3189	6.61172	6.68543	6.81793	6.44693	0.132501	0.285908	0.34882	-0.238498	0.122294	0.247442
AT1G13140	cytochrome P450, family 86, subfamily C, polypeptide 3	0	chr1	4478491	4480327	5.32087	5.54812	5.58026	5.4082	4.93366	5.21734	5.50131	5.29457	5.39934	5.48309	5.1864	5.39841	-0.296686	0.154044	0.279188	-0.084676	0.453539	0.393015
AT1G13145		1	chr1	4480860	4481334	8.14658	8.11991	7.96309	8.23137	8.51583	8.27251	8.25836	8.13532	8.47224	8.07653	8.3399	8.28864	0.263377	0.0778912	0.225036	0.212113	0.153228	0.265122
AT1G13150	cytochrome P450, family 86, subfamily C, polypeptide 4	0	chr1	4481875	4483696	5.09621	5.10262	4.84578	5.00487	5.32865	5.05853	5.15746	5.20294	5.21766	5.01487	5.13068	5.19269	0.115815	0.428243	0.410186	0.17782	0.165272	0.271966
AT1G13160	ARM repeat superfamily protein	1	chr1	4484584	4488577	9.78321	10.1033	10.2622	9.87307	9.87436	9.87978	9.94605	9.94742	9.83139	10.0496	9.87574	9.90829	-0.173842	0.342474	0.374798	-0.141292	0.423776	0.382305
AT1G13170	OSBP(oxysterol binding protein)-related protein 1D	0	chr1	4488533	4492587	6.99139	7.0823	6.92683	7.03604	6.87776	6.75041	6.93365	6.81623	6.7188	7.00018	6.88807	6.82289	-0.112106	0.316909	0.363393	-0.177281	0.0883922	0.230045
AT_1_+_0_4493956-4494051		1	chr1	4493959	4494054	5.28665	5.3686	5.21307	4.95952	5.36406	5.28585	5.0983	5.4035	5.50396	5.28944	5.20314	5.33526	-0.0862977	0.567388	0.46241	0.0458147	0.751727	0.491503
AT1G13180	Actin-like ATPase superfamily protein	1	chr1	4495028	4498469	6.07303	6.20718	6.31105	6.17827	6.00673	6.3699	6.3558	6.27791	6.55377	6.19709	6.18497	6.39583	-0.0121198	0.928398	0.571452	0.198739	0.13948	0.257329
AT1G13190	RNA-binding (RRM/RBD/RNP motifs) family protein	1	chr1	4498881	4501613	7.84821	8.14136	8.05495	8.02339	7.89465	8.01632	8.01067	8.10853	8.05304	8.01484	7.97812	8.05741	-0.0367137	0.729918	0.51563	0.0425778	0.680186	0.469864
AT1G13195	RING/U-box superfamily protein	0	chr1	4501581	4503591	6.22707	6.2282	6.03667	7.22119	7.13021	7.17919	7.17319	7.42185	7.29832	6.16398	7.17686	7.29779	1.01288	0.00126224	0.0859567	1.13381	0.000317845	0.0778416	1	1
AT1G13200	F-box and associated interaction domains-containing protein	0	chr1	4507221	4508528	5.93383	5.85201	6.35298	5.55347	6.09491	5.83067	5.80545	5.46791	5.73712	6.04627	5.82635	5.67016	-0.21992	0.374545	0.387883	-0.376115	0.12411	0.248687
AT1G13210	autoinhibited Ca2+/ATPase II	0	chr1	4508963	4513938	9.56611	9.75901	9.52853	9.80252	9.87497	10.057	9.82711	9.91441	10.0088	9.61789	9.91149	9.91675	0.293602	0.0479284	0.197265	0.298869	0.0318723	0.192063
AT1G13220	nuclear matrix constituent protein-related	1	chr1	4515606	4520284	7.29681	7.61265	7.62972	7.45785	7.4605	7.45262	7.57	7.58223	7.22339	7.51306	7.45699	7.45854	-0.0560662	0.656096	0.492254	-0.0545162	0.75034	0.491169
AT1G13230	Leucine-rich repeat (LRR) family protein	1	chr1	4520631	4522544	5.56754	5.47553	5.35699	4.9166	5.30569	5.16625	5.28261	5.31774	5.10614	5.46669	5.12951	5.2355	-0.337173	0.0779713	0.225036	-0.23119	0.0613277	0.21349
AT1G13245	ROTUNDIFOLIA like 17	0	chr1	4525486	4526064	9.66164	9.35978	9.30798	9.74875	9.83748	9.79709	9.70538	9.69188	9.70728	9.44313	9.79444	9.70151	0.351307	0.0790867	0.225546	0.258382	0.143595	0.260036
AT1G13250	galacturonosyltransferase-like 3	0	chr1	4528623	4530063	10.304	10.4218	10.5547	10.1877	10.135	10.1619	10.4137	10.4416	10.2449	10.4268	10.1615	10.3667	-0.265316	0.0614559	0.211169	-0.0600929	0.562083	0.430798
AT1G13260	related to ABI3/VP1 1	1	chr1	4542168	4543742	6.41662	6.55928	6.53818	7.49256	7.31081	7.46382	7.13697	7.20834	7.45244	6.50469	7.4224	7.26592	0.917704	0.000294971	0.070632	0.761221	0.00664363	0.154768	1
AT1G13270	methionine aminopeptidase 1B	1	chr1	4544953	4547312	7.01702	7.22922	7.27705	7.34176	6.95246	7.08295	7.17074	7.00287	6.97224	7.17443	7.12572	7.04862	-0.0487069	0.746619	0.520641	-0.125809	0.284708	0.327248
AT1G13280	allene oxide cyclase 4	1	chr1	4547454	4548875	6.07574	6.25689	6.29444	6.31471	6.10247	6.28271	6.09011	6.27072	6.2234	6.20902	6.2333	6.19474	0.024275	0.809874	0.539353	-0.0142798	0.877246	0.526532
AT1G13290	C2H2-like zinc finger protein	0	chr1	4550153	4551620	6.08669	6.25738	6.01445	5.86876	5.9537	5.98388	5.79552	4.99952	5.43903	6.11951	5.93544	5.41136	-0.184062	0.108449	0.24904	-0.708149	0.0802183	0.225098
AT1G13300	myb-like transcription factor family protein	1	chr1	4556892	4558708	11.8056	11.7107	11.5201	12.2295	12.1356	12.2885	12.2406	12.1861	12.042	11.6788	12.2178	12.1562	0.539028	0.0104432	0.134863	0.477422	0.0124546	0.171644
AT1G13310	Endosomal targeting BRO1-like domain-containing protein	0	chr1	4561068	4563061	6.60076	6.56406	6.10282	6.51062	6.08651	6.26485	6.04734	6.54436	6.31448	6.42255	6.28733	6.30206	-0.13522	0.542096	0.453888	-0.120488	0.605693	0.444812
AT1G13320	protein phosphatase 2A subunit A3	0	chr1	4563471	4567807	10.881	10.872	10.8279	10.8546	10.7473	10.8011	10.8196	10.812	10.6028	10.8603	10.801	10.7448	-0.059298	0.188065	0.298513	-0.115507	0.242073	0.308341
AT1G13330	Arabidopsis Hop2 homolog	1	chr1	4567935	4570598	5.18199	5.42055	5.29785	5.98075	5.65724	5.95347	5.63075	5.62606	5.63202	5.30013	5.86382	5.62961	0.563688	0.0145267	0.144352	0.329478	0.0409432	0.199403
AT1G13340	Regulator of Vps4 activity in the MVB pathway protein	0	chr1	4569448	4571118	10.4565	10.3833	10.2984	10.4202	10.4386	10.4526	10.728	10.7228	10.8835	10.3794	10.4371	10.7781	0.0577484	0.332873	0.370573	0.398719	0.00492386	0.143363
AT1G13350	Protein kinase superfamily protein	0	chr1	4572419	4576632	8.46336	8.46222	8.4518	8.45224	8.41082	8.51349	8.47117	8.44193	8.45607	8.45913	8.45885	8.45639	-0.000275321	0.9935	0.587592	-0.00273567	0.787576	0.501389
AT1G13360		0	chr1	4576873	4577967	12.881	12.7237	12.5601	12.7418	12.7188	12.6589	12.6513	12.6984	12.789	12.7216	12.7065	12.7129	-0.0151017	0.88771	0.561225	-0.00871051	0.937243	0.54295
AT_1_+_2_4584171-4584392		1	chr1	4584174	4584395	7.05018	7.0391	7.18892	6.83697	6.73871	6.95859	6.87692	6.68419	6.62533	7.09273	6.84476	6.72881	-0.247971	0.0395526	0.186531	-0.363919	0.0215923	0.183288
AT1G13370	Histone superfamily protein	0	chr1	4587780	4588613	6.038	5.76292	5.7257	6.41255	6.11524	6.22719	6.4431	6.54948	6.6047	5.84221	6.25166	6.53243	0.409455	0.0362822	0.182882	0.69022	0.00905701	0.163549
AT1G13380	Protein of unknown function (DUF1218)	0	chr1	4589071	4590423	10.5803	10.515	10.5899	10.5919	10.6799	10.636	10.4706	10.5017	10.6216	10.5617	10.6359	10.5313	0.0742167	0.0990342	0.242095	-0.0304101	0.597935	0.442217
AT1G13390		0	chr1	4592481	4594391	9.99751	9.81464	9.78736	10.0611	10.0519	10.1122	9.95869	9.93885	10.0527	9.8665	10.0751	9.98342	0.208552	0.0775374	0.224685	0.116919	0.214249	0.29538
AT1G13400	C2H2 and C2HC zinc fingers superfamily protein	1	chr1	4597627	4598911	5.87352	5.97858	5.67536	5.62218	5.43223	5.8139	5.70155	5.52578	5.6992	5.84249	5.62277	5.64217	-0.219721	0.198734	0.304556	-0.200313	0.143814	0.260065
AT1G13410	Tetratricopeptide repeat (TPR)-like superfamily protein	1	chr1	4601261	4603298	7.11275	7.39501	7.45545	7.05352	7.27551	7.38919	7.23207	7.31097	6.99352	7.32107	7.23941	7.17885	-0.0816602	0.602227	0.474948	-0.142217	0.3748	0.363931
AT1G13420	sulfotransferase 4B	1	chr1	4604841	4606053	11.8946	11.8297	11.6348	12.1248	12.1126	12.1781	11.993	12.1406	12.1617	11.7864	12.1385	12.0984	0.352116	0.0386993	0.18566	0.31209	0.0359511	0.194774
AT1G13430	sulfotransferase 4C	1	chr1	4606500	4607747	9.2484	9.21064	9.00192	9.17347	9.29686	9.09539	9.26766	9.33915	9.29786	9.15365	9.18858	9.30156	0.0349227	0.736949	0.517601	0.147903	0.187171	0.283108
AT1G13440	glyceraldehyde-3-phosphate dehydrogenase C2	0	chr1	4608196	4610647	13.959	13.8678	14.0238	13.9331	13.8342	13.9228	13.9778	14.0967	13.7402	13.9502	13.8967	13.9383	-0.0534743	0.392841	0.395904	-0.0119328	0.923966	0.539314
AT1G13448	other RNA	1	chr1	4612243	4612929	8.24366	8.16814	8.1813	7.99749	8.08593	8.18997	8.25331	8.03038	8.17246	8.1977	8.09113	8.15205	-0.10657	0.186191	0.29752	-0.045652	0.564996	0.431904
AT1G13450	Homeodomain-like superfamily protein	0	chr1	4612731	4615353	7.96132	7.85939	7.8814	7.91437	8.03812	7.99436	7.838	7.98884	8.03386	7.9007	7.98228	7.95357	0.0815818	0.163842	0.285797	0.0528653	0.486412	0.404593
AT1G13460	Protein phosphatase 2A regulatory B subunit family protein	1	chr1	4615813	4618329	8.62526	8.79542	8.52025	8.86924	8.84945	8.85139	8.84299	8.91737	9.07417	8.64698	8.85669	8.94484	0.209717	0.119459	0.256581	0.297865	0.0487276	0.203849
AT1G13470	Protein of unknown function (DUF1262)	0	chr1	4620228	4621580	4.43879	4.68982	4.83557	4.41781	4.73374	4.5651	4.70508	4.44298	4.42472	4.65472	4.57222	4.52426	-0.082508	0.607301	0.476432	-0.130464	0.427869	0.383499
AT1G13480	Protein of unknown function (DUF1262)	0	chr1	4622634	4624070	8.31558	8.30055	7.71416	7.4838	7.5173	7.45796	7.59996	7.61465	7.61889	8.11009	7.48635	7.61117	-0.623741	0.0866373	0.23195	-0.498927	0.127851	0.251227
AT1G13485		0	chr1	4624171	4624344	5.0903	5.03426	4.8289	5.08026	5.11995	4.94196	4.99498	5.39236	5.08995	4.98449	5.04739	5.15909	0.0628994	0.552807	0.457407	0.174605	0.300594	0.333635
AT1G13490	Protein of unknown function (DUF1262)	0	chr1	4624715	4626064	5.78897	5.38277	5.6612	5.61494	5.74355	5.50062	5.50596	5.67064	5.91919	5.61098	5.6197	5.6986	0.00872256	0.953633	0.577546	0.0876167	0.63292	0.454601
AT1G13500	Protein of unknown function (DUF1262)	0	chr1	4627789	4629169	6.82299	6.89532	6.54755	6.6011	6.87162	6.37536	6.81102	6.79337	6.95067	6.75528	6.61602	6.85169	-0.13926	0.482008	0.431331	0.0964047	0.473573	0.399706
AT1G13510	Protein of unknown function (DUF1262)	0	chr1	4629203	4630821	7.0024	7.00132	6.54928	6.78514	6.7518	6.7766	6.9714	7.03803	7.11386	6.851	6.77118	7.04109	-0.0798198	0.649859	0.490391	0.190093	0.33427	0.34698
AT1G13520	Protein of unknown function (DUF1262)	0	chr1	4631778	4633248	11.3826	11.3096	10.3059	10.204	10.1525	10.2364	10.4552	10.4788	10.5966	10.9994	10.1976	10.5102	-0.801753	0.146679	0.274822	-0.489183	0.293647	0.330744
AT1G13530	Protein of unknown function (DUF1262)	0	chr1	4633740	4635129	7.11806	7.37679	6.98631	6.98631	6.84619	7.20062	7.24541	7.01621	6.74111	7.16038	7.01104	7.00091	-0.149345	0.388192	0.394093	-0.159474	0.440902	0.388217
AT1G13540	Protein of unknown function (DUF1262)	0	chr1	4635463	4636805	5.45141	5.45195	5.4409	5.6615	5.59343	5.65686	5.95832	6.18847	5.77584	5.44809	5.63726	5.97421	0.189173	0.0115486	0.138267	0.526121	0.0477077	0.203169
AT1G13550	Protein of unknown function (DUF1262)	0	chr1	4636984	4638330	6.87237	6.7793	6.4673	6.29457	6.29587	6.40911	6.36459	6.49638	6.50576	6.70632	6.33318	6.45558	-0.37314	0.0819485	0.228699	-0.250747	0.167148	0.272505
AT1G13560	aminoalcoholphosphotransferase 1	0	chr1	4638514	4642104	8.89558	8.73099	8.92726	8.74937	8.67934	8.67695	8.82456	8.77531	8.71927	8.85128	8.70189	8.77305	-0.14939	0.11986	0.256784	-0.0782278	0.334942	0.347186
AT1G13570	F-box/RNI-like superfamily protein	0	chr1	4642346	4644422	9.00933	9.13039	9.06449	9.31422	9.27269	9.27925	8.90441	9.01929	9.23426	9.06807	9.28872	9.05266	0.220648	0.0152681	0.146304	-0.0154124	0.892024	0.530558
AT1G13580	LAG1 longevity assurance homolog 3	0	chr1	4644521	4647007	9.11294	8.98806	9.00122	9.0127	9.00011	8.97879	8.9653	8.99054	9.15979	9.03407	8.9972	9.03854	-0.0368736	0.452614	0.420194	0.00447217	0.954414	0.54694
AT1G13590	phytosulfokine 1 precursor	1	chr1	4647949	4648740	10.5889	10.3817	10.517	10.0513	10.198	10.233	10.2769	10.1885	10.0947	10.4959	10.1608	10.1867	-0.335101	0.0154911	0.146691	-0.309152	0.0190603	0.180534
AT1G13600	basic leucine-zipper 58	0	chr1	4650787	4651469	6.99246	6.88887	7.00005	6.84759	6.76089	6.69753	6.76349	6.67864	6.89714	6.96046	6.76867	6.77976	-0.19179	0.0287694	0.17146	-0.180704	0.0854968	0.228369
AT1G13605		1	chr1	4658538	4659106	5.35242	5.2859	5.17094	5.431	5.32961	5.52539	5.4655	5.45972	5.1371	5.26975	5.42867	5.35411	0.158911	0.109901	0.250174	0.0843544	0.536696	0.422499
AT1G13607	Defensin-like (DEFL) family protein	1	chr1	4660778	4661218	5.61402	5.84665	5.85358	5.61811	5.59559	5.88651	5.68367	5.31833	5.5415	5.77142	5.70007	5.5145	-0.0713445	0.591475	0.471068	-0.256918	0.130116	0.252288
AT1G13608	Defensin-like (DEFL) family protein	1	chr1	4661682	4662029	6.06726	5.80096	5.96289	5.97718	6.01398	5.93164	5.80464	6.01178	5.72546	5.9437	5.97427	5.84729	0.0305646	0.737178	0.517671	-0.0964098	0.450417	0.391986
AT1G13609	Defensin-like (DEFL) family protein	1	chr1	4662721	4663219	5.29583	5.52319	5.54933	5.33316	5.2506	5.63379	5.49426	5.06148	5.009	5.45612	5.40585	5.18825	-0.0502682	0.742538	0.519471	-0.26787	0.219823	0.298046
AT1G13610	alpha/beta-Hydrolases superfamily protein	0	chr1	4663831	4666031	5.86715	5.95681	6.49787	6.11557	6.08609	5.69243	6.09692	6.27517	5.90854	6.10728	5.9647	6.09355	-0.14258	0.587564	0.469962	-0.0137324	0.954822	0.547072
AT1G13620		1	chr1	4668443	4669471	8.92148	8.82664	8.80778	8.64104	8.48754	8.70189	8.62816	8.55806	8.55197	8.85197	8.61016	8.57939	-0.241809	0.0426522	0.190725	-0.272572	0.00457946	0.142391
AT1G13630	Tetratricopeptide repeat (TPR)-like superfamily protein	0	chr1	4669784	4672957	6.24675	6.18442	6.2628	6.24155	6.05205	6.14519	6.26555	6.27641	6.2164	6.23133	6.14626	6.25279	-0.0850647	0.257605	0.334562	0.0214647	0.518885	0.416724
AT1G13635	DNA glycosylase superfamily protein	1	chr1	4674152	4676170	7.08482	7.29384	7.28745	7.34259	7.54548	7.51635	7.22056	7.27816	7.19663	7.22204	7.46814	7.23178	0.246103	0.0582516	0.20853	0.00974613	0.903529	0.534072
AT1G13640	Phosphatidylinositol 3- and 4-kinase family protein	0	chr1	4677027	4679812	10.6655	10.5958	10.7078	10.9953	11.071	10.9807	10.6487	10.7593	10.6797	10.6564	11.0157	10.6959	0.359302	0.00124146	0.0859567	0.0395169	0.442283	0.388821
AT1G13650		0	chr1	4680432	4682196	5.30331	4.46643	5.15353	4.95173	4.7738	5.27154	4.82272	5.01698	4.89344	4.97442	4.99902	4.91104	0.0245991	0.938746	0.573927	-0.0633781	0.830763	0.51353
AT1G13660	transposable element gene	1	chr1	4683171	4685640	5.65243	5.40119	5.59897	5.15893	5.13905	5.13828	5.15364	5.59908	5.47384	5.55086	5.14542	5.40885	-0.405445	0.0328697	0.178663	-0.142009	0.418128	0.380066
AT1G13670		1	chr1	4688156	4688966	10.8248	10.7791	11.0302	10.5581	10.5977	10.2057	10.0912	10.2704	10.1036	10.878	10.4538	10.1551	-0.424222	0.0552078	0.20492	-0.722974	0.00228127	0.12405
AT1G13680	PLC-like phosphodiesterases superfamily protein	1	chr1	4690409	4692841	5.61637	5.5601	5.58735	5.4032	5.50153	5.34031	5.49874	5.28342	5.23857	5.58794	5.41501	5.34024	-0.172926	0.053776	0.203693	-0.247696	0.0855534	0.228369
AT1G13690	ATPase E1	1	chr1	4693289	4694410	8.66433	8.65238	8.88011	8.64936	8.77091	8.77785	8.58091	8.67421	8.623	8.73227	8.73271	8.62604	0.000431529	0.996251	0.588247	-0.106235	0.285701	0.327769
AT1G13700	6-phosphogluconolactonase 1	0	chr1	4694372	4696023	9.10361	9.04324	9.27579	9.33312	9.23845	9.30046	9.54939	9.46692	9.47058	9.14088	9.29067	9.49563	0.149791	0.152866	0.278441	0.35475	0.0246191	0.186999
AT1G13710	cytochrome P450, family 78, subfamily A, polypeptide 5	0	chr1	4702725	4704657	8.90127	8.90957	9.40831	8.71309	8.69835	8.63443	8.64286	8.82664	8.57359	9.07305	8.68196	8.68103	-0.391093	0.142196	0.272598	-0.392021	0.12991	0.252169
AT1G13730	Nuclear transport factor 2 (NTF2) family protein with RNA binding (RRM-RBD-RNP motifs) domain	1	chr1	4709824	4712550	10.9461	11.2043	11.3403	10.774	10.7073	10.8248	10.7873	10.8944	10.5935	11.1636	10.7687	10.7584	-0.394873	0.0659611	0.215125	-0.405162	0.0533734	0.207073
AT1G13740	ABI five binding protein 2	1	chr1	4713674	4715407	8.36716	8.43058	8.44085	8.59354	8.49388	8.48402	8.15667	8.16155	8.24467	8.41286	8.52381	8.18763	0.110951	0.0663268	0.215424	-0.225233	0.00411424	0.139677
AT1G13750	Purple acid phosphatases superfamily protein	0	chr1	4715394	4718235	9.52315	9.65663	9.69683	9.46058	9.33421	9.54994	9.6132	9.63503	9.45473	9.62554	9.44824	9.56765	-0.177293	0.0978252	0.241327	-0.0578833	0.496111	0.40816
AT1G13755	Defensin-like (DEFL) family protein	0	chr1	4718673	4719354	4.80284	4.50596	4.84783	4.8006	4.90552	5.03892	4.97491	5.74548	4.81525	4.71888	4.91501	5.17855	0.196138	0.210714	0.310738	0.45967	0.246089	0.309769
AT1G13760		0	chr1	4720243	4721342	5.0101	5.1411	5.02974	5.00295	5.0054	4.79311	4.78371	4.67791	4.88423	5.06031	4.93382	4.78195	-0.126492	0.211893	0.310937	-0.27836	0.0228739	0.18472
AT1G13770	Protein of unknown function, DUF647	1	chr1	4721695	4724510	7.63772	7.57267	7.55759	7.4649	7.79151	7.50341	7.42738	7.42684	7.55344	7.58933	7.5866	7.46922	-0.00272286	0.981616	0.58477	-0.120108	0.0847631	0.228231
AT1G13780	F-box/RNI-like/FBD-like domains-containing protein	1	chr1	4724608	4726499	7.44623	7.5016	7.56763	7.32356	7.54802	7.66933	7.48695	7.60735	7.72263	7.50515	7.51364	7.60564	0.00848519	0.942861	0.575158	0.100487	0.280882	0.32568
AT1G13790	XH/XS domain-containing protein	1	chr1	4727438	4730425	5.96273	6.1281	6.35584	6.07876	6.08	5.95548	5.85535	5.85419	5.84139	6.14889	6.03808	5.85031	-0.110811	0.439553	0.414506	-0.298581	0.11978	0.245969
AT1G13800	Tetratricopeptide repeat (TPR)-like superfamily protein	0	chr1	4731056	4733707	5.98014	6.1072	6.16867	6.19667	5.86288	6.08377	6.26069	6.17216	5.83488	6.08533	6.04777	6.08924	-0.0375596	0.75971	0.525	0.00390822	0.979815	0.55342
AT1G13810	Restriction endonuclease, type II-like superfamily protein	1	chr1	4734036	4735389	7.56746	7.66091	7.88721	7.73866	7.66982	7.68352	7.6619	7.93051	7.93098	7.70519	7.69733	7.84113	-0.00785599	0.942369	0.575063	0.135938	0.356699	0.356286
AT1G13820	alpha/beta-Hydrolases superfamily protein	1	chr1	4735547	4737808	8.74263	8.61862	8.67411	9.0267	9.13872	8.99729	8.66133	8.68295	8.85622	8.67845	9.05424	8.7335	0.375784	0.00289176	0.102961	0.0550506	0.493115	0.407101
AT1G13830	Carbohydrate-binding X8 domain superfamily protein	0	chr1	4739873	4741038	11.2107	11.1388	10.8814	11.2698	11.2805	11.2843	11.2739	11.2668	11.3526	11.077	11.2782	11.2978	0.2012	0.181536	0.294987	0.220767	0.150078	0.263154
AT_1_+_2_4742553-4742684		1	chr1	4742556	4742687	5.23783	5.18024	5.04784	5.18826	5.37822	4.82625	7.60044	5.5538	5.53181	5.1553	5.13091	6.22869	-0.0243936	0.897589	0.564058	1.07338	0.257586	0.315622
AT1G13850	pre-tRNA	1	chr1	4743095	4743167	7.84618	7.65827	7.71453	7.39345	7.40997	7.50566	7.74318	7.23835	7.40017	7.73966	7.43636	7.46057	-0.3033	0.0148348	0.145309	-0.27909	0.193256	0.28651
AT1G13860	QUASIMODO2 LIKE 1	0	chr1	4743205	4746956	5.79646	6.04993	6.10619	6.03097	5.70725	6.01166	5.93368	5.81962	5.94663	5.98419	5.91662	5.89997	-0.0675697	0.65846	0.492967	-0.0842205	0.481293	0.402768
AT1G13870	calmodulin binding;purine nucleotide binding	0	chr1	4747265	4748642	8.38443	8.54753	8.34926	8.32975	8.35778	8.34926	8.34156	8.43373	8.48986	8.42707	8.3456	8.42172	-0.0814798	0.313161	0.361578	-0.00535846	0.94671	0.545423
AT1G13880	ELM2 domain-containing protein	1	chr1	4748873	4751212	11.1766	11.2808	11.2597	11.284	11.2706	11.3108	11.163	11.1674	11.1712	11.239	11.2885	11.1672	0.0494326	0.256531	0.334094	-0.0718342	0.15169	0.264099
AT1G13890	soluble N-ethylmaleimide-sensitive factor adaptor protein 30	1	chr1	4751581	4752844	5.8518	5.9614	6.46795	5.74827	5.30101	5.58733	5.84068	5.25227	5.43403	6.09372	5.54554	5.50899	-0.548179	0.084326	0.230107	-0.584723	0.0860991	0.228606
AT1G13900	Purple acid phosphatases superfamily protein	0	chr1	4753145	4755580	7.75563	7.98741	7.88012	8.03137	8.1078	8.04222	7.94637	7.8705	7.89255	7.87438	8.06046	7.90314	0.18608	0.0956178	0.23935	0.0287521	0.716974	0.481055
AT1G13910	Leucine-rich repeat (LRR) family protein	1	chr1	4755784	4757991	8.64393	8.65584	8.80297	8.49722	8.46517	8.571	8.70158	8.70475	8.8662	8.70091	8.51113	8.75751	-0.189782	0.0441744	0.192467	0.0566004	0.490591	0.406317
AT1G13920	Remorin family protein	1	chr1	4758188	4759754	9.14434	9.20196	9.22025	9.19715	9.34879	9.27298	9.0043	9.09663	9.16206	9.18885	9.27298	9.08766	0.0841276	0.186563	0.297673	-0.101186	0.144199	0.260225
AT1G13930		1	chr1	4761012	4762666	15.9855	15.9079	16.164	15.929	16.0611	16.0945	16.0945	16.1983	16.164	16.0191	16.0282	16.1523	0.0090854	0.926039	0.571067	0.133154	0.214245	0.29538
AT1G13940	Plant protein of unknown function (DUF863)	0	chr1	4762703	4766749	9.0911	9.07219	9.17814	9.08587	8.89397	9.10536	8.97709	9.07814	9.1431	9.11381	9.0284	9.06611	-0.0854085	0.34	0.373646	-0.0476973	0.465045	0.396771
AT1G13950	eukaryotic elongation factor 5A-1	1	chr1	4773576	4774867	11.7561	11.7641	11.6039	11.7054	11.8134	11.8093	11.7537	11.7374	11.5981	11.708	11.776	11.6964	0.0679938	0.348616	0.377201	-0.0116195	0.879265	0.527024
AT1G13960	WRKY DNA-binding protein 4	1	chr1	4776463	4779400	10.3833	10.4052	10.2416	10.3705	10.4817	10.4155	10.501	10.5946	10.4718	10.3434	10.4225	10.5225	0.079175	0.273397	0.34277	0.179081	0.0527678	0.206403
AT1G13970	Protein of unknown function (DUF1336)	0	chr1	4779523	4782542	8.84274	8.78936	8.59354	8.72752	8.755	8.7589	8.73167	8.78285	8.95357	8.74188	8.74714	8.8227	0.00525867	0.9512	0.57703	0.080819	0.469808	0.398354
AT1G13980	sec7 domain-containing protein	1	chr1	4788463	4794654	9.70207	9.78094	9.80116	9.67009	9.73646	9.64777	9.60424	9.60811	9.4336	9.76139	9.68477	9.54865	-0.076616	0.131112	0.264888	-0.212739	0.0460922	0.20225
AT1G13990		1	chr1	4794756	4796597	11.1869	11.0229	10.8582	11.2581	11.2751	11.2441	11.2558	11.204	11.3305	11.0227	11.2591	11.2635	0.236392	0.129111	0.26335	0.240784	0.11267	0.242231
AT1G14000	VH1-interacting kinase	1	chr1	4797358	4800283	9.68674	9.67134	9.65663	9.82158	9.76201	9.79006	9.83474	9.97261	10.0455	9.67157	9.79122	9.95094	0.119646	0.00877873	0.127887	0.279373	0.0432125	0.200801
AT1G14010	emp24/gp25L/p24 family/GOLD family protein	0	chr1	4800169	4801850	7.47547	7.6106	7.53982	7.72475	7.69862	7.74715	7.70787	7.52316	7.65196	7.54196	7.72351	7.62766	0.181547	0.0316228	0.176957	0.0857004	0.277829	0.324318
AT1G14020	O-fucosyltransferase family protein	1	chr1	4802720	4805375	6.95663	7.0838	7.01854	6.89218	6.92419	6.9004	6.98935	6.98992	6.92608	7.01966	6.90559	6.96845	-0.114066	0.0814228	0.228034	-0.0512047	0.308735	0.336927
AT1G14030	Rubisco methyltransferase family protein	0	chr1	4805306	4807517	6.97685	7.0903	7.30011	7.11292	7.06593	7.16328	7.15235	7.15937	7.08554	7.12242	7.11404	7.13242	-0.00837505	0.939113	0.574035	0.0100023	0.92678	0.540178
AT1G14040	EXS (ERD1/XPR1/SYG1) family protein	1	chr1	4810488	4814543	8.2214	8.29544	8.34028	8.30891	8.44374	8.42413	8.43086	8.53185	8.05167	8.2857	8.39226	8.33813	0.106555	0.124832	0.260299	0.0524242	0.757407	0.493183
AT_1_+_1_4815194-4815292		1	chr1	4815197	4815295	6.06165	5.7437	6.07424	5.70879	5.89925	5.83321	5.93787	5.427	5.59556	5.95987	5.81375	5.65348	-0.146118	0.316178	0.363005	-0.306389	0.180458	0.279009
AT1G14048	GCK domain-containing protein	0	chr1	4815683	4815988	5.69565	5.4058	5.54316	5.13901	5.42473	5.41178	5.49735	5.22057	5.33526	5.5482	5.32517	5.35106	-0.223029	0.150365	0.276681	-0.197142	0.164549	0.271722
AT1G14060	GCK domain-containing protein	0	chr1	4817144	4818020	9.99545	10.1294	10.333	10.0713	10.1176	10.0886	9.99069	10.0183	9.88972	10.1526	10.0925	9.96622	-0.0600978	0.603753	0.475442	-0.186392	0.188989	0.284186
AT1G14070	fucosyltransferase 7	1	chr1	4818548	4820150	9.92842	9.93262	9.66822	10.0353	9.89466	10.062	10.1885	10.0884	10.2613	9.84309	9.99734	10.1794	0.154251	0.219626	0.315161	0.336298	0.0407061	0.199302
AT1G14071	MIR830a; miRNA	0	chr1	4820405	4820499	5.67422	5.54145	5.61446	5.76362	5.92803	5.29435	5.6026	5.41691	5.6816	5.61004	5.662	5.56704	0.0519599	0.81194	0.539897	-0.0430053	0.657244	0.462293
AT1G14080	fucosyltransferase 6	1	chr1	4822528	4824414	10.7896	10.7749	10.7136	10.602	10.5692	10.7093	10.6945	10.6918	10.7876	10.7594	10.6269	10.7247	-0.132509	0.0683382	0.217134	-0.0346993	0.429477	0.384074
AT1G14090		0	chr1	4824433	4827436	7.38962	7.21139	7.19484	7.22767	7.21588	7.47119	7.27489	7.2971	7.09784	7.26528	7.30491	7.22328	0.0396314	0.723919	0.513741	-0.0420057	0.660404	0.463096
AT1G14100	fucosyltransferase 8	1	chr1	4827961	4829587	4.93944	5.03291	5.09555	5.01885	4.70631	5.2967	4.93925	5.13542	4.92506	5.02264	5.00729	4.99991	-0.0153461	0.93774	0.573691	-0.0227265	0.796423	0.503564
AT1G14110	fucosyltransferase 9	1	chr1	4830297	4831915	4.88118	4.7086	4.45463	4.77424	4.83233	4.91055	4.56538	4.79584	4.69989	4.68147	4.83904	4.68704	0.157568	0.331216	0.36989	0.00556675	0.970883	0.551447
AT_1_-_0_4832757-4832852		0	chr1	4832760	4832855	6.34597	6.21862	6.19094	5.85464	6.27895	6.41372	6.12225	5.93513	5.84345	6.25184	6.18244	5.96694	-0.0694039	0.725363	0.514129	-0.284897	0.0527349	0.206403
AT1G14120	2-oxoglutarate (2OG) and Fe(II)-dependent oxygenase superfamily protein	0	chr1	4833518	4835089	10.1151	9.96595	9.79844	10.0793	9.98177	9.84187	9.8485	9.83171	10.145	9.95984	9.96764	9.94173	0.00779974	0.949202	0.576524	-0.0181121	0.901141	0.533428
AT1G14130	2-oxoglutarate (2OG) and Fe(II)-dependent oxygenase superfamily protein	0	chr1	4835724	4837616	7.06276	7.19597	7.15432	7.22723	7.08157	7.12719	7.44529	7.26019	7.25036	7.13768	7.14533	7.31862	0.00764664	0.902018	0.564982	0.180933	0.0850011	0.228293
AT1G14140	Mitochondrial substrate carrier family protein	0	chr1	4837927	4839633	5.3545	5.31084	5.51287	5.48582	5.55025	5.12408	5.35477	5.4637	5.38471	5.39274	5.38672	5.40106	-0.00602066	0.969881	0.581896	0.00831955	0.912122	0.536146
AT1G14150	PsbQ-like 2	1	chr1	4839853	4840751	5.59338	5.63869	5.79162	5.97027	5.79302	5.70909	5.51973	6.68594	6.1445	5.67456	5.82413	6.11672	0.149564	0.204302	0.307318	0.442158	0.31893	0.340912
AT1G14160	Uncharacterised protein family (UPF0497)	0	chr1	4840697	4841848	9.98488	9.67029	9.4745	9.931	9.91113	9.9059	9.58149	9.77069	9.81033	9.70989	9.91601	9.72084	0.206117	0.299794	0.355413	0.010946	0.951347	0.546457
AT1G14170	RNA-binding KH domain-containing protein	0	chr1	4843234	4845847	9.27561	9.31886	9.11044	9.09619	9.37075	9.1127	9.264	9.32083	9.34261	9.23497	9.19321	9.30915	-0.0417548	0.723681	0.513713	0.0741767	0.366257	0.36034
AT_1_-_2_4846522-4846635		0	chr1	4846525	4846638	4.75306	4.85805	4.79218	5.02468	4.55308	4.34056	4.56242	4.69174	4.74767	4.8011	4.63944	4.66728	-0.161658	0.508846	0.442066	-0.133824	0.11908	0.245612
AT1G14180	RING/U-box superfamily protein	1	chr1	4847162	4849207	7.5417	7.78188	7.79645	7.57038	7.40674	7.6002	7.45902	7.60506	7.38432	7.70667	7.52577	7.4828	-0.180901	0.158054	0.282044	-0.223875	0.103842	0.238568
AT1G14182		0	chr1	4849448	4849826	6.5074	6.30535	6.31149	6.69702	6.83606	6.63971	6.64324	6.46621	6.77225	6.37475	6.72426	6.62723	0.349519	0.0172557	0.150647	0.252486	0.090166	0.231093
AT1G14185	Glucose-methanol-choline (GMC) oxidoreductase family protein	1	chr1	4850274	4852096	8.83422	8.75096	8.70741	8.90957	8.99632	8.86764	8.75545	8.85856	8.89142	8.7642	8.92451	8.83514	0.160311	0.039214	0.186145	0.070944	0.269627	0.320655
AT1G14190	Glucose-methanol-choline (GMC) oxidoreductase family protein	1	chr1	4852802	4854307	8.63242	8.61733	8.74937	8.78761	8.70122	8.74362	8.53497	8.67463	8.45369	8.66637	8.74415	8.55443	0.0777757	0.200512	0.305399	-0.111945	0.230269	0.302597
AT1G14200	RING/U-box superfamily protein	0	chr1	4854384	4855200	11.8073	11.633	11.5225	12.1499	12.0595	11.9196	12.3526	12.1655	12.2575	11.6543	12.043	12.2585	0.388724	0.023505	0.162162	0.60426	0.00586894	0.15123
AT1G14205	Ribosomal L18p/L5e family protein	1	chr1	4855533	4856930	6.81985	6.92222	6.69857	6.73579	6.94828	7.02917	6.73394	6.90712	6.79692	6.81355	6.90441	6.81266	0.0908663	0.454282	0.420819	-0.000886727	0.991927	0.556344
AT1G14210	Ribonuclease T2 family protein	0	chr1	4856778	4857964	11.8708	11.9132	12.0227	12.1126	12.1995	12.1222	11.8876	11.9846	12.0234	11.9356	12.1448	11.9652	0.209193	0.0242739	0.163903	0.0296296	0.65114	0.460335
AT1G14220	Ribonuclease T2 family protein	0	chr1	4858642	4859601	11.7091	11.6787	11.89	11.147	11.1474	11.2915	11.204	11.1844	11.0236	11.7593	11.1953	11.1374	-0.563992	0.00317474	0.104385	-0.621938	0.002209	0.122338
AT1G14225		0	chr1	4860515	4860649	4.96039	4.996	4.88395	4.95636	4.69713	4.54289	4.95813	4.45906	4.65699	4.94678	4.73213	4.69139	-0.214653	0.211771	0.310893	-0.255389	0.216401	0.296331
AT1G14230	GDA1/CD39 nucleoside phosphatase family protein	1	chr1	4861266	4864094	9.38872	9.42562	9.39882	9.5877	9.5388	9.57668	9.50814	9.45934	9.61951	9.40439	9.56773	9.529	0.163339	0.00128506	0.0864252	0.124609	0.112623	0.242231
AT1G14240	GDA1/CD39 nucleoside phosphatase family protein	1	chr1	4864902	4868000	12.2378	12.2485	12.6017	12.6863	12.5693	12.5815	12.2344	12.2075	12.3732	12.3627	12.6124	12.2717	0.249702	0.163348	0.285656	-0.090994	0.53947	0.423388
AT1G14250	GDA1/CD39 nucleoside phosphatase family protein	1	chr1	4868452	4871488	5.91114	5.5975	5.98658	5.65616	5.95558	6.12733	5.91496	5.56029	5.93233	5.83174	5.91303	5.80253	0.0812893	0.678788	0.499839	-0.0292093	0.871895	0.525275
AT1G14260	RING/FYVE/PHD zinc finger superfamily protein	1	chr1	4872856	4874907	7.03612	7.20734	6.54018	6.88982	6.78813	6.84949	6.80514	6.81863	7.11206	6.92788	6.84248	6.91194	-0.0853986	0.712351	0.510139	-0.0159389	0.947766	0.545705
AT1G14270	CAAX amino terminal protease family protein	0	chr1	4874875	4877248	5.6607	5.43295	5.80183	5.50872	5.61823	5.78631	5.68113	5.56376	5.40562	5.63183	5.63775	5.55017	0.00592505	0.967106	0.581371	-0.08166	0.57738	0.435541
AT1G14280	phytochrome kinase substrate 2	1	chr1	4877627	4879149	7.68704	7.85345	7.65969	7.80265	7.93938	7.96838	7.4424	7.74624	7.7776	7.73339	7.90347	7.65541	0.170079	0.100279	0.243258	-0.0779799	0.568527	0.432876
AT1G14290	sphingoid base hydroxylase 2	0	chr1	4880051	4881964	9.29103	9.32145	9.27652	9.07192	9.08136	9.07417	9.16836	9.1821	9.09294	9.29633	9.07582	9.1478	-0.220517	0.00253661	0.101255	-0.148531	0.0186976	0.180256
AT1G14300	ARM repeat superfamily protein	0	chr1	4882376	4884791	9.2518	9.37234	9.58131	9.44641	9.39701	9.44801	9.29371	9.29425	9.06498	9.40182	9.43048	9.21765	0.0286612	0.795489	0.535229	-0.184172	0.211803	0.294088
AT1G14310	Haloacid dehalogenase-like hydrolase (HAD) superfamily protein	1	chr1	4885044	4886793	9.29828	9.3425	9.29371	9.49585	9.52407	9.59446	9.51057	9.33602	9.28073	9.3115	9.53812	9.37577	0.226624	0.00613947	0.119914	0.0642757	0.453179	0.392842
AT1G14315	F-box and associated interaction domains-containing protein	0	chr1	4886768	4887933	6.02339	5.85136	6.36643	5.98512	6.04934	6.01391	5.95938	5.56653	5.80173	6.08039	6.01612	5.77588	-0.0642712	0.713392	0.510386	-0.304515	0.188866	0.284105
AT1G14320	Ribosomal protein L16p/L10e family protein	1	chr1	4888214	4889661	14.2699	14.5174	14.5848	14.2119	14.148	14.3663	14.3467	14.5202	14.216	14.4574	14.242	14.3609	-0.215333	0.145751	0.274517	-0.0964303	0.500012	0.409413
AT1G14330	Galactose oxidase/kelch repeat superfamily protein	0	chr1	4890118	4892251	9.59034	9.71584	9.64875	9.54396	9.61267	9.67883	9.58019	9.68983	9.60732	9.65164	9.61182	9.62578	-0.0398209	0.495988	0.43684	-0.0258641	0.625808	0.451976
AT1G14340	RNA-binding (RRM/RBD/RNP motifs) family protein	1	chr1	4897346	4898961	10.8433	10.7902	10.6682	10.9092	10.8915	10.9336	10.967	11.0302	11.0873	10.7672	10.9114	11.0282	0.144217	0.101606	0.244509	0.260943	0.0183768	0.180256
AT1G14345	NAD(P)-linked oxidoreductase superfamily protein	1	chr1	4899145	4899979	5.72582	5.81236	5.79254	5.89659	5.6238	5.57515	5.98001	5.72277	5.69123	5.77691	5.69851	5.798	-0.0783936	0.51912	0.445569	0.0210965	0.842482	0.516634
AT_1_-_2_4902244-4902360		0	chr1	4902249	4902365	5.6418	5.64892	6.12678	5.70879	5.92205	5.86009	5.63683	5.48362	5.50162	5.80583	5.83031	5.54069	0.0244793	0.897408	0.56402	-0.265144	0.235502	0.304973
AT_1_-_1_4907009-4907140		0	chr1	4907014	4907145	5.75418	5.36257	5.83735	5.84929	5.53221	6.22442	5.51866	5.56611	5.37001	5.65137	5.86864	5.48493	0.217269	0.434465	0.412816	-0.16644	0.378663	0.365719
AT1G14350	Duplicated homeodomain-like superfamily protein	1	chr1	4907953	4911168	7.68943	7.84573	7.72224	7.79207	7.65748	7.6811	8.08593	8.09135	8.13602	7.75247	7.71022	8.10443	-0.04225	0.540631	0.453599	0.351965	0.0113045	0.170524
AT1G14360	UDP-galactose transporter 3	0	chr1	4911093	4913152	10.6094	10.714	10.7449	10.7531	10.7425	10.8361	10.6953	10.669	10.3344	10.6894	10.7772	10.5662	0.0878038	0.164476	0.2861	-0.123212	0.40434	0.375521
AT1G14370	protein kinase 2A	1	chr1	4915576	4918138	9.55379	9.36573	9.04511	9.68814	9.677	9.74506	9.61225	9.62036	9.8576	9.32154	9.7034	9.69674	0.381854	0.121031	0.257451	0.37519	0.110537	0.241889
AT1G14380	IQ-domain 28	0	chr1	4918010	4921596	8.75604	8.90251	9.02559	8.84998	8.80572	8.824	8.88997	8.8559	8.83451	8.89471	8.82656	8.86013	-0.0681487	0.474997	0.428443	-0.0345869	0.703203	0.47714
AT1G14390	Leucine-rich repeat protein kinase family protein	1	chr1	4924277	4926794	5.09482	4.97332	5.08113	4.76717	5.08383	5.09648	4.98876	4.69135	5.0342	5.04975	4.9825	4.90477	-0.067259	0.605295	0.475985	-0.144985	0.309365	0.337222
AT1G14400	ubiquitin carrier protein 1	0	chr1	4927011	4928690	7.75056	7.72371	7.38064	7.87663	7.81267	7.87091	7.90617	7.94705	8.32088	7.6183	7.8534	8.05803	0.2351	0.183968	0.2962	0.439729	0.0693098	0.218464
AT1G14410	ssDNA-binding transcriptional regulator	0	chr1	4929123	4930904	8.23781	8.2698	8.452	8.37294	8.18308	8.34964	8.30281	8.43362	8.16749	8.31987	8.30188	8.30131	-0.0179838	0.850785	0.551014	-0.018561	0.864287	0.523003
AT1G14420	Pectate lyase family protein	0	chr1	4931566	4933515	4.69101	4.62113	4.34383	4.69738	4.16159	4.63999	4.53106	4.34383	4.53757	4.55199	4.49965	4.47082	-0.0523359	0.809032	0.539164	-0.0811668	0.554623	0.428325
AT1G14430	glyoxal oxidase-related protein	1	chr1	4934120	4936100	5.39272	5.84629	5.84854	6.22717	6.12519	6.06989	5.93885	5.99338	5.99398	5.69585	6.14075	5.9754	0.444899	0.0884321	0.233361	0.279555	0.204967	0.291398
AT1G14440	homeobox protein 31	0	chr1	4938824	4940903	5.17847	5.11325	5.18776	5.08747	5.09939	5.23798	5.11011	5.24725	5.09326	5.15983	5.14161	5.15021	-0.0182119	0.757592	0.524245	-0.0096187	0.870673	0.524999
AT1G14450	NADH dehydrogenase (ubiquinone)s	0	chr1	4946218	4947576	11.518	11.4529	11.3865	11.3216	11.4208	11.4293	11.6895	11.6554	11.623	11.4525	11.3906	11.656	-0.0618752	0.295223	0.352782	0.20353	0.0179196	0.179894
AT1G14455		0	chr1	4947819	4948400	6.53729	6.65243	6.11296	6.05467	5.79511	5.92446	5.98872	6.43705	6.31225	6.43423	5.92475	6.24601	-0.509481	0.07201	0.220816	-0.18822	0.425818	0.383042
AT1G14460	AAA-type ATPase family protein	0	chr1	4948748	4952927	8.96303	8.99913	9.12515	8.89331	8.9009	8.86484	8.9075	8.98191	8.90441	9.0291	8.88635	8.93127	-0.142753	0.0944318	0.238053	-0.0978317	0.175154	0.276792
AT1G14470	Pentatricopeptide repeat (PPR) superfamily protein	1	chr1	4954080	4955702	5.44836	5.37107	5.19447	5.26643	4.66037	5.14527	5.10674	5.09094	5.08791	5.33797	5.02402	5.0952	-0.313945	0.226185	0.318778	-0.24277	0.0830345	0.22708
AT1G14480	Ankyrin repeat family protein	1	chr1	4956257	4958076	6.38785	6.81996	6.60883	7.10272	7.09406	7.1379	6.7209	6.89106	6.89532	6.60555	7.11156	6.83576	0.506015	0.0542263	0.204211	0.230212	0.198356	0.288967
AT1G14490	Predicted AT-hook DNA-binding family protein	0	chr1	4958514	4959325	4.72457	5.1456	5.15157	5.09074	4.43996	4.72236	4.96146	5.05399	5.3272	5.00725	4.75102	5.11422	-0.256229	0.342238	0.374697	0.10697	0.584106	0.43754
AT1G14500	Ankyrin repeat family protein	1	chr1	4960375	4961780	5.56971	5.75581	5.79834	5.94093	5.86288	5.69313	5.95322	5.97204	5.50553	5.70795	5.83231	5.81026	0.124364	0.287329	0.349338	0.102312	0.587873	0.43876
AT1G14510	alfin-like 7	0	chr1	4961886	4964428	10.6482	10.822	10.8565	10.7488	10.7462	10.8112	10.7547	10.7441	10.684	10.7756	10.7687	10.7276	-0.00683503	0.927529	0.57121	-0.0479839	0.542069	0.424169
AT_1_-_1_4965917-4966036		0	chr1	4965922	4966041	5.64651	5.61324	5.8346	5.427	5.67917	5.78905	5.71833	5.75532	5.34485	5.69812	5.63174	5.60616	-0.0663794	0.634335	0.485228	-0.0919527	0.578307	0.435813
AT1G14518	other RNA	0	chr1	4966810	4967493	5.70322	5.69292	5.50753	5.65037	5.52474	5.63919	5.69389	5.75424	5.99415	5.63456	5.60477	5.8141	-0.0297885	0.715725	0.511038	0.179541	0.191545	0.285575
AT1G14520	myo-inositol oxygenase 1	0	chr1	4968142	4970311	7.90012	7.61229	7.8081	7.38858	7.55638	7.65076	7.52359	7.29155	7.04927	7.7735	7.53191	7.28814	-0.241598	0.102923	0.2454	-0.485369	0.0497629	0.204546
AT1G14530	Protein of unknown function (DUF1084)	0	chr1	4970858	4973726	8.10721	8.16444	8.16019	8.13191	8.10365	8.16248	8.22597	8.46793	8.15474	8.14395	8.13268	8.28288	-0.0112668	0.676302	0.498941	0.138932	0.27854	0.324532
AT1G14540	Peroxidase superfamily protein	0	chr1	4974067	4975705	8.58482	8.7534	6.941	6.79081	6.68608	6.7141	7.4632	7.7607	7.96802	8.09307	6.73033	7.73064	-1.36274	0.142077	0.272572	-0.362431	0.598942	0.442566
AT1G14549		0	chr1	4978794	4978907	4.96058	5.0034	4.74449	4.59498	4.86625	4.81949	4.76753	4.82423	5.12898	4.90282	4.76024	4.90691	-0.142584	0.286089	0.348907	0.00409073	0.977898	0.553081
AT1G14550	Peroxidase superfamily protein	1	chr1	4979028	4980324	7.68434	7.8758	5.79586	6.09845	6.1913	6.13325	6.35353	6.55164	6.27986	7.11866	6.141	6.39501	-0.977667	0.278534	0.345446	-0.723655	0.389456	0.36953
AT1G14560	Mitochondrial substrate carrier family protein	1	chr1	4980672	4983284	9.14375	9.34024	9.28524	9.21975	9.2206	9.31323	9.13909	9.14813	9.15769	9.25641	9.25119	9.14831	-0.0052163	0.942127	0.575047	-0.108103	0.205139	0.291486
AT1G14570	UBX domain-containing protein	1	chr1	4983535	4987375	12.1471	12.2951	12.3435	12.2166	12.2154	12.2493	12.2049	12.2301	12.1815	12.2619	12.2271	12.2055	-0.0348366	0.61742	0.479553	-0.056403	0.442401	0.388843
AT1G14580	C2H2-like zinc finger protein	1	chr1	4989562	4992732	8.44851	8.53253	8.41718	8.62706	8.60952	8.65359	8.39741	8.50003	8.36764	8.46607	8.63006	8.42169	0.163984	0.0294433	0.172746	-0.0443814	0.449371	0.391566
AT1G14590	Nucleotide-diphospho-sugar transferase family protein	0	chr1	4998816	5000643	5.86413	5.9492	5.52249	5.98019	5.92762	6.1658	5.62375	5.7042	5.87922	5.77861	6.02454	5.73572	0.245927	0.193987	0.301747	-0.0428838	0.793298	0.502778
AT1G14600	Homeodomain-like superfamily protein	0	chr1	5001011	5003370	6.89661	6.97563	7.01537	7.02343	6.75584	6.83936	6.95859	7.01766	7.09741	6.96254	6.87288	7.02456	-0.0896639	0.381866	0.391042	0.0620156	0.31012	0.337492
AT1G14610	valyl-tRNA synthetase / valine--tRNA ligase (VALRS)	0	chr1	5008244	5014533	10.2981	10.5001	10.5244	10.3274	10.2599	10.3613	10.3759	10.3978	10.2269	10.4409	10.3162	10.3335	-0.124679	0.217711	0.314443	-0.107389	0.301613	0.334065
AT1G14620	decoy	0	chr1	5014753	5016604	11.1604	11.1591	11.352	11.1513	11.1162	11.1874	11.0058	11.0328	10.8473	11.2238	11.1516	10.962	-0.0722316	0.378899	0.389706	-0.261844	0.0392093	0.197562
AT1G14630		1	chr1	5019955	5021537	8.29624	8.19738	8.64854	8.75369	8.45092	8.40205	8.67618	8.53548	8.2823	8.38072	8.53555	8.49799	0.154833	0.429917	0.410907	0.117265	0.549051	0.426416
AT1G14640	SWAP (Suppressor-of-White-APricot)/surp domain-containing protein	1	chr1	5023656	5025955	6.79651	6.9049	6.73255	7.09784	7.11768	6.87128	6.98533	6.89965	7.06941	6.81132	7.02893	6.9848	0.217615	0.0926823	0.237123	0.173483	0.0689631	0.218332
AT1G14642		1	chr1	5026364	5026585	6.76992	6.75109	6.91391	7.3231	7.19497	7.28867	7.0686	6.99603	7.06993	6.81164	7.26891	7.04485	0.457274	0.00274166	0.102253	0.233214	0.0288415	0.189236
AT1G14650	SWAP (Suppressor-of-White-APricot)/surp domain-containing protein / ubiquitin family protein	1	chr1	5027662	5031779	10.8536	11.0332	11.1217	10.8877	10.845	10.8915	10.9274	10.9297	10.8731	11.0028	10.8748	10.9101	-0.128076	0.243495	0.327324	-0.0927603	0.360686	0.358101
AT1G14660	Na+/H+ exchanger 8	0	chr1	5031950	5036477	6.12277	5.86578	6.27002	6.10328	5.79209	5.97393	5.99993	5.64781	5.76186	6.08619	5.95643	5.8032	-0.129758	0.435157	0.412965	-0.282991	0.147402	0.261657
AT1G14670	Endomembrane protein 70 protein family	1	chr1	5037612	5040528	12.3472	12.6201	12.6834	12.299	12.2178	12.4245	12.3856	12.3435	12.209	12.5502	12.3138	12.3127	-0.236491	0.135746	0.268405	-0.23751	0.133459	0.253763
AT1G14680		1	chr1	5040861	5041733	6.34513	6.4053	6.34116	6.71353	6.70978	6.66175	7.00234	6.89511	6.95035	6.36386	6.69502	6.94927	0.331158	0.00031158	0.0710868	0.585404	0.000229166	0.0747752		1
AT1G14685	basic pentacysteine 2	1	chr1	5042323	5044294	8.61594	8.69987	8.74625	8.76647	8.63093	8.6477	8.74433	8.84689	8.7489	8.68735	8.6817	8.78004	-0.00565466	0.926092	0.571069	0.0926832	0.142921	0.259789
AT1G14686	ENTH/ANTH/VHS superfamily protein	0	chr1	5045781	5046800	9.72531	9.31582	9.48415	9.35845	9.54699	9.45859	9.38229	9.33881	9.77831	9.50843	9.45467	9.4998	-0.0537533	0.710291	0.509441	-0.00862284	0.964827	0.549581
AT1G14687	homeobox protein 32	1	chr1	5047803	5048612	5.65342	5.89503	5.63847	5.67813	5.40224	5.67759	5.81539	5.7287	5.84345	5.72897	5.58599	5.79585	-0.142985	0.31336	0.361611	0.0668749	0.517489	0.416267
AT1G14688		0	chr1	5049526	5050983	4.88369	4.88342	4.91497	4.75574	5.21634	5.09379	5.10956	4.85978	5.1612	4.89403	5.02196	5.04351	0.127926	0.451184	0.419728	0.149483	0.24852	0.310933
AT1G14690	microtubule-associated protein 65-7	0	chr1	5051760	5055252	10.7363	10.7856	10.9962	10.8569	10.8519	10.6911	10.6674	10.6226	10.7732	10.8394	10.8	10.6877	-0.0393972	0.706625	0.508506	-0.151618	0.191355	0.285395
AT1G14700	purple acid phosphatase 3	1	chr1	5058680	5061136	5.48059	5.68293	5.58852	5.4258	5.5991	5.54642	5.67698	5.3304	5.87604	5.58401	5.52377	5.62781	-0.0602366	0.482511	0.431558	0.0437962	0.81599	0.509025
AT1G14710	hydroxyproline-rich glycoprotein family protein	0	chr1	5061866	5065178	8.63697	8.93797	8.97811	8.76158	8.61347	8.79964	8.8455	8.75604	8.56297	8.85102	8.7249	8.72151	-0.126117	0.375542	0.388378	-0.129509	0.398499	0.373061
AT1G14720	xyloglucan endotransglucosylase/hydrolase 28	0	chr1	5066636	5068645	10.2574	10.2924	10.4215	10.633	10.5769	10.4777	10.595	10.6189	10.6297	10.3237	10.5625	10.6146	0.238792	0.0243877	0.164121	0.29083	0.0243304	0.186969
AT_1_-_2_5070664-5070771		0	chr1	5070669	5070776	4.36758	4.65313	4.66731	4.44548	4.93902	4.53194	4.80383	4.74638	4.85539	4.56268	4.63882	4.80187	0.0761424	0.698815	0.505776	0.239191	0.123196	0.248014
AT1G14730	Cytochrome b561/ferric reductase transmembrane protein family	1	chr1	5073105	5074779	11.7525	11.7337	11.8636	11.4829	11.4034	11.2218	11.5585	11.567	11.5542	11.7833	11.3693	11.5599	-0.413943	0.0174745	0.151311	-0.223368	0.0304536	0.189898
AT1G14740	Protein of unknown function (DUF1423)	0	chr1	5075213	5077791	11.4722	11.5908	11.574	11.7096	11.7722	11.7679	11.5322	11.5974	11.6732	11.5456	11.7499	11.6009	0.204251	0.0156957	0.146913	0.0552709	0.372865	0.363222
AT1G14750	Cyclin family protein	0	chr1	5079407	5082520	4.84257	5.09786	5.17759	5.09024	4.90429	5.55676	5.07615	5.03638	5.29531	5.03934	5.18376	5.13595	0.144425	0.556212	0.458744	0.0966082	0.498096	0.408614
AT1G14755	S locus-related glycoprotein 1 (SLR1) binding pollen coat protein family	1	chr1	5083742	5084342	5.3091	4.97504	5.27217	5.03246	5.37767	5.1992	5.3344	5.77135	5.19258	5.18544	5.20311	5.43278	0.0176711	0.909091	0.566663	0.247339	0.304489	0.335188
AT1G14760	KNOX Arabidopsis thaliana meinox	0	chr1	5084352	5085213	5.35836	5.63224	5.19011	5.15575	5.30051	5.35357	5.25579	5.06413	5.38393	5.39357	5.26994	5.23462	-0.123631	0.451314	0.419758	-0.158954	0.378836	0.365793
AT_1_+_0_5086021-5086161		1	chr1	5086026	5086166	5.15704	4.92839	5.00415	4.93992	5.05351	5.09245	5.19266	5.28208	5.07865	5.02986	5.02862	5.18446	-0.00123412	0.988713	0.58656	0.154605	0.159956	0.269227
AT1G14770	RING/FYVE/PHD zinc finger superfamily protein	0	chr1	5086626	5088846	7.18445	7.41158	7.48708	7.284	7.18207	7.35097	7.22471	7.21285	7.07135	7.36104	7.27235	7.16963	-0.0886877	0.452533	0.42018	-0.191403	0.158924	0.26876
AT1G14780	MAC/Perforin domain-containing protein	1	chr1	5090990	5094152	9.25464	9.14162	8.92774	9.14778	9.27816	9.20344	9.33114	9.28253	9.5516	9.108	9.20979	9.38842	0.101791	0.405788	0.400818	0.280421	0.0926436	0.232487
AT1G14790	RNA-dependent RNA polymerase 1	0	chr1	5093961	5098032	5.25478	5.5564	5.44965	5.49374	5.67132	7.29937	5.56601	5.73889	5.44945	5.42028	6.15481	5.58478	0.734532	0.328817	0.368704	0.164505	0.248741	0.310983
AT1G14800	Nucleic acid-binding, OB-fold-like protein	1	chr1	5099572	5102558	5.45336	5.5059	5.74799	5.44076	5.21787	5.29143	5.35706	5.082	5.44965	5.56908	5.31669	5.29624	-0.252396	0.0937825	0.237594	-0.272846	0.131513	0.252835
AT1G14810	semialdehyde dehydrogenase family protein	0	chr1	5102424	5104695	7.97446	8.31388	8.40157	7.93782	8.0454	8.10057	8.12088	8.14181	7.99863	8.22997	8.02793	8.08711	-0.202038	0.257216	0.334462	-0.142862	0.390393	0.369965
AT1G14820	Sec14p-like phosphatidylinositol transfer family protein	0	chr1	5105018	5106954	9.02413	9.22173	9.16194	9.03746	9.13367	9.25162	9.15363	9.20344	9.08643	9.13593	9.14092	9.14783	0.00498289	0.956173	0.578162	0.0118988	0.870849	0.525031
AT1G14830	DYNAMIN-like 1C	0	chr1	5107421	5111670	11.087	11.3309	11.3258	11.0277	10.9364	11.1328	11.1323	11.1121	10.8155	11.2479	11.0323	11.02	-0.21561	0.10138	0.244129	-0.227923	0.158972	0.26876
AT1G14840	microtubule-associated proteins 70-4	0	chr1	5111955	5115497	5.26087	5.32208	5.22066	5.10406	5.34395	5.13012	5.12592	5.29801	5.43294	5.26787	5.19271	5.28562	-0.0751582	0.434158	0.412717	0.0177526	0.864252	0.523003
AT1G14850	nucleoporin 155	0	chr1	5116696	5123259	9.18899	9.4661	9.4171	9.20924	9.02625	9.19715	9.20065	9.28278	9.27604	9.3574	9.14422	9.25316	-0.213179	0.117961	0.255533	-0.104237	0.347024	0.352889
AT_1_-_1_5124323-5124421		0	chr1	5124328	5124426	5.17087	5.03372	4.94099	5.13432	5.0859	5.12059	4.84739	5.05399	5.04032	5.04853	5.1136	4.98057	0.0650767	0.433881	0.412554	-0.0679581	0.511338	0.413743
AT1G14860	nudix hydrolase homolog 18	1	chr1	5124742	5126151	9.23924	9.10465	8.91108	9.36187	9.60402	9.4306	9.21407	9.217	9.31367	9.08499	9.4655	9.24824	0.380504	0.0368578	0.183534	0.163252	0.222614	0.299355
AT1G14870	PLANT CADMIUM RESISTANCE 2	0	chr1	5128375	5129523	12.647	12.5888	11.7166	12.1163	12.2477	12.1964	12.5481	12.5473	12.5841	12.3175	12.1868	12.5598	-0.130699	0.707369	0.508672	0.242366	0.505146	0.411348
AT1G14880	PLANT CADMIUM RESISTANCE 1	0	chr1	5132535	5133716	4.68589	4.49181	4.60719	4.40393	4.75237	4.65194	4.35281	4.31888	4.18893	4.59496	4.60274	4.28688	0.00778392	0.9514	0.577055	-0.308085	0.0154016	0.1747
AT_1_-_2_5134216-5134365		0	chr1	5134221	5134370	4.91426	4.87075	4.81591	4.81961	4.64411	4.73797	4.86925	4.894	5.05279	4.86697	4.7339	4.93868	-0.133073	0.101983	0.244679	0.0717099	0.347021	0.352889
AT_1_+_1_5135558-5135689		1	chr1	5135563	5135694	4.74707	5.26649	5.15157	4.88627	5.34658	5.45694	5.17242	5.2579	4.91255	5.05504	5.22993	5.11429	0.17489	0.498973	0.438107	0.0592442	0.771504	0.497131
AT1G14890	Plant invertase/pectin methylesterase inhibitor superfamily protein	1	chr1	5137014	5137957	11.2459	11.1663	11.5729	11.661	11.6156	11.4974	11.0502	11.2465	11.3051	11.3283	11.5913	11.2006	0.262996	0.157624	0.281716	-0.127709	0.441079	0.388318
AT1G14900	high mobility group A	0	chr1	5138334	5139432	12.7049	12.8685	12.9571	12.6782	12.5181	12.6557	12.5518	12.6693	12.4437	12.8435	12.6173	12.5549	-0.226185	0.0728058	0.22144	-0.288617	0.0436097	0.200964
AT1G14910	ENTH/ANTH/VHS superfamily protein	0	chr1	5139712	5143689	9.78577	10.5159	10.5035	10.4447	10.3661	10.4142	10.3978	10.4412	10.4432	10.2684	10.4083	10.4274	0.139937	0.621191	0.480792	0.15899	0.577951	0.435722
AT1G14920	GRAS family transcription factor family protein	1	chr1	5149226	5151354	8.56755	8.66876	8.68429	8.35239	8.48034	8.55037	8.61805	8.72935	8.69662	8.6402	8.46103	8.68134	-0.179168	0.0703395	0.219313	0.0411388	0.451409	0.392283
AT1G14930	Polyketide cyclase/dehydrase and lipid transport superfamily protein	0	chr1	5152263	5153084	5.84101	5.74553	5.87146	6.04759	5.99914	6.08669	5.35615	5.64939	5.6885	5.81933	6.04447	5.56468	0.225141	0.0110837	0.136967	-0.254655	0.123534	0.248349
AT1G14940	Polyketide cyclase/dehydrase and lipid transport superfamily protein	0	chr1	5154537	5155564	4.47908	4.57118	4.82958	4.36083	5.23105	4.42113	4.55433	4.46686	4.61137	4.62661	4.671	4.54418	0.0443929	0.893108	0.562896	-0.0824268	0.525373	0.419064
AT1G14950	Polyketide cyclase/dehydrase and lipid transport superfamily protein	0	chr1	5157336	5158269	4.77655	4.55079	4.48832	4.74314	4.24466	4.4044	4.53391	4.40431	4.59014	4.60522	4.46407	4.50945	-0.141153	0.465326	0.424863	-0.0957649	0.41583	0.3796
AT1G14960	Polyketide cyclase/dehydrase and lipid transport superfamily protein	0	chr1	5159199	5160083	12.6238	12.5493	11.9813	12.8722	12.9323	12.9798	12.2654	12.397	12.5454	12.3848	12.9281	12.4026	0.543341	0.11252	0.251859	0.0177865	0.940911	0.544116
AT1G14970	O-fucosyltransferase family protein	0	chr1	5161949	5164917	7.79095	8.10685	8.14454	8.10743	7.81024	8.0443	8.0668	8.0894	7.6691	8.01411	7.98732	7.94177	-0.0267912	0.861862	0.55425	-0.0723468	0.70384	0.477237
AT1G14980	chaperonin 10	0	chr1	5165628	5166745	10.2114	10.3748	10.4468	9.9546	10.0074	10.1255	10.0608	10.0929	9.99806	10.3443	10.0292	10.0506	-0.31514	0.0252579	0.165826	-0.293718	0.0376182	0.196526
AT1G14990		0	chr1	5167031	5168264	9.66761	9.54699	9.72208	9.73125	9.71497	9.63814	9.65941	9.63204	9.72483	9.64556	9.69479	9.67209	0.0492281	0.464188	0.424606	0.0265321	0.681005	0.470084
AT1G15000	serine carboxypeptidase-like 50	1	chr1	5168596	5170066	10.1294	10.2714	10.2911	10.0205	10.1209	10.0641	10.2514	10.2453	10.0437	10.2306	10.0685	10.1802	-0.162127	0.0654785	0.214847	-0.0504628	0.587765	0.43876
AT1G15002		0	chr1	5169940	5170435	5.46955	5.40132	5.37958	5.5831	5.58406	5.53678	5.53582	5.92197	5.41384	5.41682	5.56798	5.62388	0.151163	0.0145852	0.144432	0.20706	0.307908	0.336647
AT1G15010		1	chr1	5171207	5171742	6.65479	6.66929	6.76213	6.83046	7.06917	7.1592	6.94928	6.77396	7.00741	6.6954	7.01961	6.91021	0.324206	0.0678688	0.216772	0.214809	0.0736047	0.220341
AT1G15015	F-box family protein	1	chr1	5172081	5172923	5.12427	4.70488	4.75696	4.85983	5.1181	5.08113	5.01101	4.87874	4.90455	4.86204	5.01968	4.93143	0.157647	0.376671	0.388906	0.0693956	0.658015	0.462504
AT1G15020	quiescin-sulfhydryl oxidase 1	0	chr1	5173097	5176223	9.01024	8.94044	9.1821	9.12404	9.18412	9.21303	9.13274	9.15423	9.10361	9.04426	9.17373	9.13019	0.129468	0.205812	0.308206	0.0859308	0.353761	0.355021
AT1G15030	Protein of unknown function (DUF789)	1	chr1	5177529	5180049	9.07572	9.18307	9.16463	9.04875	9.14105	9.1908	9.19036	9.18028	9.25705	9.14114	9.12687	9.20923	-0.0142755	0.802331	0.53727	0.0680893	0.178605	0.278074
AT1G15040	Class I glutamine amidotransferase-like superfamily protein	0	chr1	5179887	5181389	5.97337	6.1755	6.34576	6.42764	6.70965	6.60015	6.58339	6.70184	6.34248	6.16488	6.57915	6.54257	0.414271	0.041152	0.188728	0.377691	0.0665448	0.217091
AT1G15045		1	chr1	5181857	5181964	5.39526	5.29988	5.53748	5.16078	4.82205	5.13289	5.11959	4.82146	5.13816	5.41087	5.03857	5.0264	-0.372303	0.054192	0.204211	-0.384471	0.0429802	0.200763
AT1G15050	indole-3-acetic acid inducible 34	0	chr1	5182256	5183243	5.9572	5.91195	5.90909	5.85238	6.00574	5.57515	6.27619	6.31301	5.83282	5.92608	5.81109	6.14068	-0.114989	0.458246	0.422155	0.214596	0.298336	0.332603
AT1G15060	Uncharacterised conserved protein UCP031088, alpha/beta hydrolase	0	chr1	5183607	5186974	8.36678	8.50506	8.4327	8.47278	8.4542	8.52002	8.44713	8.36601	8.48754	8.43485	8.48234	8.43356	0.0474901	0.366138	0.384679	-0.00128455	0.982037	0.553987
AT1G15080	lipid phosphate phosphatase 2	1	chr1	5187626	5189673	8.18223	8.10474	8.26743	8.09212	7.93231	8.06907	8.20122	8.144	7.94421	8.1848	8.03117	8.09648	-0.153632	0.0886433	0.233462	-0.0883194	0.397579	0.37268
AT1G15090	pre-tRNA	0	chr1	5189687	5189760	7.56465	7.06598	7.24385	7.13047	7.21018	6.59239	7.16625	6.74901	7.08388	7.29149	6.97768	6.99971	-0.313815	0.270666	0.341768	-0.29178	0.207918	0.29283
CUFF.7361		1	chr1	5192162	5192631	10.5637	10.5933	10.7558	10.4021	10.3671	10.0898	10.9845	10.7084	10.4462	10.6376	10.2863	10.713	-0.351288	0.0494432	0.198876	0.0754278	0.685847	0.471404
gb__F19900		0	chr1	5192339	5192614	8.35121	8.03573	8.46517	8.05293	8.499	8.20207	8.36001	8.74792	8.52081	8.28404	8.25133	8.54291	-0.0327087	0.867217	0.555751	0.258873	0.205301	0.29157
AT1G15100	RING-H2 finger A2A	0	chr1	5193426	5194203	11.7251	11.6918	11.6176	11.804	11.8293	11.7371	11.5687	11.7194	11.7608	11.6782	11.7901	11.683	0.111911	0.0573813	0.207494	0.00476311	0.947256	0.545625
AT_1_+_0_5196916-5197047		1	chr1	5196921	5197052	10.606	10.0929	10.1483	10.1595	10.2195	10.258	9.96153	10.0122	10.3366	10.2824	10.2123	10.1035	-0.0700677	0.710409	0.509479	-0.178936	0.427393	0.383472
AT1G15110	phosphatidyl serine synthase family protein	1	chr1	5199018	5202175	8.90004	8.92577	8.88898	8.7303	8.83563	8.84566	9.05586	8.95108	8.82837	8.90493	8.80386	8.94511	-0.101065	0.101387	0.244129	0.0401778	0.604995	0.444557
AT1G15120	Ubiquinol-cytochrome C reductase hinge protein	1	chr1	5202648	5204193	7.91117	7.94136	7.76815	7.98422	7.88571	7.98038	8.22552	8.16645	8.0854	7.87356	7.9501	8.15913	0.0765439	0.30043	0.355772	0.285565	0.0151719	0.174273
AT1G15125	S-adenosyl-L-methionine-dependent methyltransferases superfamily protein	1	chr1	5204625	5205912	5.63402	5.75684	5.19926	5.92012	5.67172	5.46074	5.54862	6.51867	5.16766	5.53004	5.68419	5.74498	0.154152	0.515162	0.444374	0.214941	0.659679	0.46289
AT1G15130	Endosomal targeting BRO1-like domain-containing protein	0	chr1	5206002	5209915	10.3835	10.4821	10.5044	10.5597	10.5306	10.5935	10.5159	10.5124	10.5249	10.4567	10.5613	10.5177	0.104586	0.0882314	0.233096	0.061065	0.241138	0.307857
AT1G15140	FAD/NAD(P)-binding oxidoreductase	0	chr1	5210206	5212349	9.5348	9.39497	9.49956	9.54501	9.45129	9.56588	9.42773	9.48536	9.53511	9.47644	9.52073	9.48273	0.044284	0.465733	0.424924	0.00628898	0.910398	0.535728
AT1G15150	MATE efflux family protein	1	chr1	5212615	5214858	5.43687	5.41205	5.62598	5.88848	5.76937	5.87746	5.7045	5.18197	5.38537	5.49163	5.84511	5.42394	0.353472	0.0177674	0.151826	-0.0676889	0.713632	0.480117
AT1G15160	MATE efflux family protein	1	chr1	5215475	5217545	6.27098	6.04193	6.34737	6.32934	7.02649	6.30753	6.00423	5.89131	5.99067	6.22009	6.55446	5.96207	0.334363	0.291353	0.350769	-0.258021	0.0919619	0.231796
AT1G15165	RING/FYVE/PHD zinc finger superfamily protein	0	chr1	5217719	5220113	4.88007	5.22125	5.45048	5.61258	5.24035	5.34185	5.16149	5.53767	5.55421	5.18393	5.39826	5.41779	0.21433	0.351188	0.378386	0.23386	0.330544	0.345427
AT1G15170	MATE efflux family protein	1	chr1	5220641	5222973	7.30328	7.59849	7.35242	7.45407	7.28213	7.29361	7.24385	7.17552	7.04549	7.41806	7.34327	7.15495	-0.0747926	0.530152	0.449344	-0.263109	0.0834029	0.227337
AT1G15175	other RNA	0	chr1	5222913	5224121	4.86695	5.29179	5.30227	4.81698	4.83566	5.06287	4.85025	4.87317	4.99669	5.15367	4.90517	4.9067	-0.248499	0.22316	0.317162	-0.246966	0.221378	0.298862
AT1G15180	MATE efflux family protein	1	chr1	5224385	5226702	6.65113	6.67418	6.55858	6.1145	6.55184	6.43074	6.52844	6.55602	6.60018	6.62797	6.36569	6.56155	-0.262275	0.175184	0.291379	-0.0664183	0.197093	0.288464
AT1G15190	Fasciclin-like arabinogalactan family protein	1	chr1	5227053	5228202	5.1711	5.32503	5.4115	4.72188	5.04539	4.6141	5.14739	4.92341	4.83792	5.30254	4.79379	4.96957	-0.508753	0.0392147	0.186145	-0.332972	0.0492743	0.204258
AT1G15200	protein-protein interaction regulator family protein	0	chr1	5228300	5231184	9.32241	9.316	9.42402	9.26766	9.25566	9.36077	9.33491	9.24289	9.33312	9.35414	9.2947	9.30364	-0.0594471	0.28551	0.348729	-0.0505045	0.338116	0.348588
AT1G15210	pleiotropic drug resistance 7	0	chr1	5231348	5236573	11.4028	11.5798	11.5989	11.4662	11.4711	11.525	11.3734	11.4762	11.4689	11.5271	11.4874	11.4395	-0.0397043	0.59605	0.472441	-0.0876383	0.301945	0.334149
AT1G15215		1	chr1	5238065	5240051	8.37824	8.4542	8.63585	8.48998	8.4682	8.64393	8.37035	8.40295	8.35639	8.48943	8.53404	8.37656	0.0446109	0.663201	0.494555	-0.112866	0.276068	0.323445
AT1G15220	cytochrome c biogenesis protein family	0	chr1	5240029	5241538	6.39897	6.33293	6.51482	6.6271	6.56822	6.5931	6.45764	6.76549	6.45888	6.41557	6.59614	6.56067	0.180566	0.0652791	0.214805	0.145099	0.297425	0.332226
AT1G15230		0	chr1	5242198	5243227	6.65095	6.5976	6.70965	7.03901	7.09083	7.02267	7.0405	7.24003	7.24969	6.65273	7.05084	7.17674	0.398102	0.00109996	0.0859567	0.524007	0.00715814	0.155538
AT1G15240	Phox-associated domain;Phox-like;Sorting nexin, C-terminal	1	chr1	5243450	5248604	7.1749	7.28317	7.26358	7.3718	7.32776	7.19775	7.17059	7.42973	7.27812	7.24055	7.29911	7.29281	0.058556	0.406908	0.401394	0.0522642	0.573802	0.434377
AT1G15250	Zinc-binding ribosomal protein family protein	0	chr1	5248664	5249474	10.2707	10.3043	10.4809	10.2293	10.3097	10.3879	10.1668	10.2519	10.2722	10.352	10.3089	10.2303	-0.0430145	0.620991	0.480715	-0.121636	0.195465	0.287808
AT1G15260		1	chr1	5249760	5250573	6.93579	6.84833	6.9981	6.66564	6.54486	6.55109	6.41283	6.46945	6.49485	6.92741	6.5872	6.45904	-0.340212	0.00450468	0.112393	-0.468365	0.00211428	0.120484
AT1G15270	Translation machinery associated TMA7	0	chr1	5250650	5252121	13.5572	13.465	13.4127	13.4693	13.6211	13.5404	13.6622	13.5682	13.8437	13.4783	13.5436	13.6913	0.0652933	0.344169	0.375388	0.213029	0.101193	0.236476
AT1G15280	CASC3/Barentsz eIF4AIII binding	1	chr1	5252315	5256753	7.98659	8.17151	7.97898	7.90268	8.07327	8.05704	8.14587	8.08289	8.08732	8.04569	8.011	8.10536	-0.0346952	0.698414	0.50565	0.0596662	0.447863	0.390999
AT1G15290	Tetratricopeptide repeat (TPR)-like superfamily protein	0	chr1	5257046	5264942	8.07327	8.36943	8.40759	8.88997	8.24878	8.2482	8.3515	8.2619	8.28103	8.28343	8.46231	8.29814	0.178883	0.509042	0.442148	0.0147114	0.903794	0.534097
AT1G15300	transposable element gene	0	chr1	5265726	5268602	6.78808	6.92865	7.05733	7.00824	7.09316	7.07991	6.90002	6.76679	6.78081	6.92469	7.06043	6.81587	0.135746	0.216579	0.313956	-0.108817	0.30424	0.335188
AT1G15310	signal recognition particle 54 kDa subunit	0	chr1	5269019	5272058	7.74356	7.80265	7.95132	8.35437	8.32349	8.40841	8.23222	8.21545	8.12449	7.83251	8.36209	8.19072	0.529575	0.0065789	0.122113	0.358206	0.0136942	0.173956
AT1G15320		0	chr1	5272256	5274074	5.40478	5.32694	5.6778	5.54958	5.47403	5.37095	5.73079	5.42202	5.50477	5.46984	5.46485	5.55253	-0.00498857	0.969104	0.581749	0.0826861	0.589243	0.439195
AT1G15330	Cystathionine beta-synthase (CBS) protein	1	chr1	5274346	5275602	6.14576	7.19052	7.18445	6.9291	7.19951	6.51964	7.1035	6.81775	6.5574	6.84024	6.88275	6.82622	0.0425074	0.921647	0.57004	-0.0140233	0.973138	0.552075
AT1G15340	methyl-CPG-binding domain 10	0	chr1	5275677	5277689	9.05121	8.88918	8.98129	9.11467	8.92484	8.91108	8.85894	8.99419	8.94432	8.97389	8.98353	8.93248	0.0096358	0.911313	0.567122	-0.0414071	0.537581	0.422878
AT1G15350		0	chr1	5278260	5279877	12.18	12.1142	11.9888	12.1609	12.2228	12.2301	12.1239	12.1593	12.2466	12.0943	12.2046	12.1766	0.110303	0.178347	0.293315	0.0823113	0.29599	0.331586
AT_1_+_1_5282948-5283040		1	chr1	5282953	5283045	4.74968	5.09838	5.0588	4.8999	5.51598	4.86355	4.79772	4.8519	4.90474	4.96895	5.09314	4.85145	0.124188	0.638666	0.486632	-0.117501	0.399914	0.37363
AT1G15360	Integrase-type DNA-binding superfamily protein	1	chr1	5283538	5284673	5.03351	5.05211	5.04773	5.32364	5.0386	5.17934	5.06554	5.47192	5.12437	5.04445	5.18053	5.22061	0.136077	0.239609	0.325312	0.17616	0.299108	0.333078
AT1G15370	SNARE-like superfamily protein	1	chr1	5287047	5288577	11.7448	11.729	11.7871	11.8269	11.8174	11.8421	11.7905	11.8476	11.6902	11.7536	11.8288	11.7761	0.0751786	0.0345859	0.18037	0.022486	0.683448	0.470572
AT1G15380	Lactoylglutathione lyase / glyoxalase I family protein	1	chr1	5290745	5292535	13.6004	13.5547	13.9228	14.1772	14.159	14.2884	13.7799	13.8266	13.6931	13.6926	14.2082	13.7665	0.515551	0.0354461	0.181651	0.0738839	0.59693	0.441975
AT1G15385		0	chr1	5292756	5293265	8.96096	8.67327	8.65899	8.89943	8.96037	9.13385	9.07507	8.94139	9.01941	8.76441	8.99788	9.01196	0.233473	0.133022	0.266575	0.247549	0.114217	0.242558
AT1G15390	peptide deformylase 1A	1	chr1	5294629	5295797	9.72496	9.87656	10.0529	9.85424	9.90455	9.96713	9.72344	9.67104	9.61899	9.88482	9.90864	9.67115	0.0238221	0.830464	0.545158	-0.213665	0.143098	0.259812
AT1G15400		0	chr1	5295773	5296902	11.7022	11.3198	11.3089	11.6286	11.751	11.6116	11.4386	11.4968	11.7371	11.4436	11.6637	11.5575	0.220111	0.224997	0.318231	0.113855	0.516018	0.415655
AT1G15405	other RNA	0	chr1	5297875	5298166	17.992	17.992	17.6895	17.8876	18.1118	17.3226	17.6895	17.4204	18.1118	17.8912	17.774	17.7406	-0.117172	0.680782	0.50027	-0.150597	0.552156	0.427524
AT1G15410	aspartate-glutamate racemase family	1	chr1	5298324	5300927	9.24974	9.32006	9.35845	9.3267	9.32194	9.3969	9.11467	9.10111	9.10925	9.30942	9.34851	9.10834	0.0390947	0.387394	0.39388	-0.201073	0.0227545	0.18472
AT1G15415		0	chr1	5300742	5301412	6.12745	6.50576	6.29784	6.31696	6.38987	5.90113	6.43187	6.8096	6.44441	6.31035	6.20265	6.56196	-0.107698	0.599311	0.473673	0.251611	0.2036	0.290913
AT1G15420		0	chr1	5301613	5303390	10.5601	10.8029	11.0049	10.7106	10.6046	10.7685	10.6195	10.6192	10.3954	10.7893	10.6946	10.5447	-0.0947568	0.547488	0.455471	-0.244597	0.192461	0.28608
AT1G15430	Protein of unknown function (DUF1644)	1	chr1	5304317	5306012	8.78427	8.90468	8.81118	8.981	8.92893	9.01755	9.18539	9.16789	9.25207	8.83337	8.97583	9.20179	0.142452	0.0385838	0.185515	0.368412	0.00184837	0.118497
AT1G15440	periodic tryptophan protein 2	0	chr1	5306061	5309514	7.38696	7.98053	8.0293	7.47245	7.42242	7.55405	7.34192	7.52855	7.46253	7.79893	7.48298	7.44433	-0.315952	0.263597	0.33815	-0.354597	0.223336	0.299587
AT1G15460	HCO3- transporter family	0	chr1	5310001	5314094	6.63573	6.81947	6.31743	7.10325	7.08295	7.13512	7.12902	7.16713	7.13293	6.59088	7.10711	7.14302	0.516231	0.0705803	0.21937	0.552149	0.0629177	0.214796
AT1G15470	Transducin/WD40 repeat-like superfamily protein	1	chr1	5315507	5317863	10.1795	10.3558	10.4953	10.2125	10.1803	10.2759	10.4029	10.363	10.0918	10.3436	10.2229	10.2859	-0.120673	0.316652	0.363293	-0.0576504	0.688904	0.472381
AT1G15480	Tetratricopeptide repeat (TPR)-like superfamily protein	1	chr1	5318011	5320594	7.91674	8.15131	8.26214	7.69846	7.76318	7.91631	7.72503	7.877	7.64574	8.11007	7.79265	7.74925	-0.317416	0.0689181	0.217739	-0.360811	0.0498913	0.204723
AT1G15490	alpha/beta-Hydrolases superfamily protein	0	chr1	5320615	5323895	9.62658	9.69911	9.68383	9.48415	9.59321	9.54445	9.52459	9.3562	9.421	9.66984	9.54061	9.43393	-0.129236	0.0336083	0.179295	-0.235913	0.0256682	0.187915
CUFF.7539		1	chr1	5325337	5325856	4.76313	5.27783	5.0434	4.89161	4.7776	4.60312	4.45608	4.67445	5.23168	5.02812	4.75744	4.7874	-0.270683	0.206753	0.308724	-0.240721	0.438117	0.387314
AT1G15500	TLC ATP/ADP transporter	1	chr1	5326290	5328874	12.7999	12.9259	13.0694	13.0867	13.0773	13.0325	12.8221	12.9394	13.0414	12.9317	13.0655	12.9343	0.13376	0.224454	0.318005	0.00256133	0.980914	0.553701
AT1G15510	Tetratricopeptide repeat (TPR)-like superfamily protein	1	chr1	5329111	5331711	6.31871	6.31856	6.32275	6.18011	6.13591	6.35241	6.34959	6.36735	6.29237	6.32001	6.22281	6.33644	-0.0971948	0.278928	0.345627	0.0164333	0.543258	0.424455
AT1G15520	pleiotropic drug resistance 12	0	chr1	5331858	5338326	5.39018	5.47389	5.65964	5.93383	5.42442	6.42719	5.41903	5.42202	5.54511	5.5079	5.92848	5.46205	0.420577	0.280905	0.346701	-0.0458509	0.644718	0.458167
AT1G15530	Concanavalin A-like lectin protein kinase family protein	0	chr1	5339961	5341931	6.66202	7.26126	7.32926	6.80577	6.63685	6.65274	6.83243	6.72674	6.57576	7.08418	6.69845	6.71164	-0.385726	0.205338	0.307873	-0.372532	0.214308	0.29538
AT1G15540	2-oxoglutarate (2OG) and Fe(II)-dependent oxygenase superfamily protein	1	chr1	5342587	5343705	9.15769	9.52779	8.40841	8.79693	8.99208	8.69426	8.68822	8.97728	8.43653	9.0313	8.82776	8.70068	-0.203543	0.604166	0.475578	-0.330624	0.434203	0.385847
AT1G15550	gibberellin 3-oxidase 1	0	chr1	5344478	5346166	10.6586	10.6545	10.9132	10.7504	10.7584	10.8007	11.2789	11.2492	11.1403	10.7421	10.7698	11.2228	0.0277306	0.778385	0.530567	0.480731	0.0161161	0.175404
AT1G15560	transposable element gene	0	chr1	5352655	5354314	5.92363	5.63245	5.73142	5.7067	5.23774	5.73295	5.68461	5.21397	5.80985	5.7625	5.55913	5.56948	-0.203371	0.344519	0.375535	-0.193022	0.410215	0.377462
AT1G15570	CYCLIN A2;3	1	chr1	5362009	5365549	8.28071	8.35639	8.59967	8.06518	7.97491	8.05792	8.16343	8.12424	7.9185	8.41226	8.03267	8.06872	-0.379587	0.0487389	0.198381	-0.343535	0.0517011	0.205958
AT1G15580	indole-3-acetic acid inducible 5	0	chr1	5365665	5366497	5.60818	5.51953	5.43908	5.9904	5.89796	5.88063	6.00365	6.306	6.65231	5.52226	5.923	6.32065	0.400732	0.00376781	0.107362	0.79839	0.0433839	0.200964
AT1G15590		1	chr1	5367297	5368670	4.96532	5.04418	5.07808	4.95694	5.1957	5.12167	4.77471	5.70108	5.73189	5.02919	5.09144	5.40256	0.0622473	0.48624	0.432732	0.373371	0.356336	0.356097
AT1G15600		1	chr1	5368923	5370344	5.2338	4.92869	5.35212	5.3326	5.21105	5.1147	5.24258	5.13768	5.1101	5.17154	5.21945	5.16345	0.0479154	0.756827	0.523954	-0.00808394	0.95603	0.547475
AT1G15610		1	chr1	5370677	5371859	6.90684	6.21754	6.82075	6.47307	6.40568	6.6728	6.4774	6.12785	6.46098	6.64838	6.51718	6.35541	-0.131196	0.616675	0.479294	-0.292966	0.316924	0.340326
AT1G15620		1	chr1	5373504	5374575	4.7407	4.99295	5.59003	4.84551	5.17105	5.33948	5.21901	4.81835	5.13439	5.10789	5.11868	5.05725	0.0107865	0.972588	0.582657	-0.0506427	0.868313	0.524265
AT1G15630		1	chr1	5376793	5378027	6.99959	6.86868	6.84197	6.717	6.54062	6.78938	6.54573	6.52164	6.6912	6.90341	6.68233	6.58619	-0.22108	0.0765801	0.223779	-0.31722	0.0117942	0.171323
AT1G15640		1	chr1	5378886	5380139	7.86248	7.66608	7.49636	7.97104	7.85028	8.01262	7.75268	7.79064	7.85249	7.67497	7.94465	7.7986	0.269675	0.109373	0.249593	0.123633	0.363526	0.359466
AT1G15660	centromere protein C	1	chr1	5381170	5385254	8.90205	9.13442	9.18406	8.73813	8.78994	8.85525	8.91178	8.93748	8.76242	9.07351	8.79444	8.87056	-0.27907	0.0697133	0.218858	-0.20295	0.132398	0.253298
AT1G15670	Galactose oxidase/kelch repeat superfamily protein	1	chr1	5389952	5391490	9.07161	8.87416	8.92379	9.23363	9.18177	9.20309	8.66983	8.68459	8.64344	8.95652	9.20616	8.66595	0.249647	0.0447956	0.193189	-0.290563	0.034789	0.194201
AT1G15680	F-box family protein	1	chr1	5393407	5394639	5.00191	5.19198	4.99389	4.88541	4.92337	4.96785	5.02864	5.05564	5.26421	5.06259	4.92554	5.11616	-0.137053	0.157836	0.281855	0.0535707	0.616458	0.448429
AT_1_-_0_5395398-5395547		0	chr1	5395403	5395552	5.36347	5.3789	4.98827	4.75262	5.00322	5.02667	5.08622	5.13931	5.13032	5.24355	4.9275	5.11861	-0.316044	0.119957	0.256831	-0.124931	0.431473	0.384877
AT1G15690	Inorganic H pyrophosphatase family protein	1	chr1	5398990	5402733	12.3078	12.5308	12.7049	12.1513	12.01	12.2127	12.3426	12.3693	12.214	12.5145	12.1247	12.3086	-0.389819	0.0569903	0.206789	-0.205908	0.207658	0.292822
AT1G15700	ATPase, F1 complex, gamma subunit protein	0	chr1	5402569	5403818	8.80305	9.00353	8.96189	9.0911	9.13647	9.04585	8.9361	8.93098	8.8815	8.92283	9.09114	8.9162	0.168312	0.0941695	0.237997	-0.00663038	0.92519	0.539757
AT1G15710	prephenate dehydrogenase family protein	1	chr1	5404358	5405686	6.64028	7.08413	6.84907	7.09339	7.03052	7.09756	7.02917	7.2033	7.26193	6.85783	7.07382	7.1648	0.215998	0.231825	0.321242	0.306974	0.123581	0.248349
AT1G15720	TRF-like 5	1	chr1	5406025	5407486	8.16572	8.29454	8.51708	8.33299	8.20469	8.18442	8.25801	8.27086	8.05222	8.32578	8.2407	8.1937	-0.0850827	0.508831	0.442066	-0.132083	0.356124	0.355987
AT1G15730	Cobalamin biosynthesis CobW-like protein	0	chr1	5407401	5409987	6.55164	6.1687	6.63118	6.70476	6.61737	6.52744	6.48579	6.40563	6.60775	6.45051	6.61653	6.49972	0.166018	0.367621	0.385172	0.0492162	0.773257	0.497543
AT1G15740	Leucine-rich repeat family protein	1	chr1	5410908	5414919	12.0434	12.1367	11.9159	12.2849	12.3322	12.3115	12.2541	12.2877	12.5783	12.032	12.3095	12.3734	0.277485	0.043999	0.192443	0.341365	0.0589871	0.211747
AT1G15750	Transducin family protein / WD-40 repeat family protein	0	chr1	5414817	5421033	10.0965	10.327	10.3177	10.0233	9.93127	10.0825	10.3045	10.1741	10.0138	10.2471	10.0124	10.1641	-0.234689	0.068832	0.217625	-0.0829293	0.503698	0.410712
AT1G15757	Molecular chaperone Hsp40/DnaJ family protein	0	chr1	5424242	5424576	5.07595	4.73031	5.35788	5.20578	4.81077	4.97914	4.77275	4.97266	5.2365	5.05472	4.99856	4.99397	-0.0561534	0.80871	0.539164	-0.0607451	0.802262	0.50524
AT1G15760	Sterile alpha motif (SAM) domain-containing protein	1	chr1	5425714	5426322	7.69265	7.66641	7.71102	7.45382	7.54911	7.34242	7.33709	7.47195	7.48132	7.69003	7.44845	7.43012	-0.241576	0.0503729	0.200336	-0.259908	0.0239265	0.186075
AT1G15770		0	chr1	5426892	5428280	5.25819	5.2335	5.11018	5.14331	5.16589	5.32657	4.96804	5.09195	5.29457	5.20062	5.21192	5.11819	0.0113001	0.88585	0.560678	-0.0824326	0.494181	0.40754
AT1G15772		0	chr1	5428520	5429561	6.98376	6.79724	7.05319	6.99924	7.08246	6.95159	7.08037	7.06761	7.10529	6.94473	7.0111	7.08442	0.0663701	0.49497	0.436576	0.139693	0.207052	0.292534
AT1G15780		0	chr1	5430183	5436412	9.47874	9.64855	9.37024	9.42188	9.45108	9.45877	9.52604	9.49986	9.33895	9.49918	9.44391	9.45495	-0.0552666	0.566516	0.462187	-0.0442253	0.683011	0.470572
AT1G15790		0	chr1	5438253	5440087	8.65623	8.68665	8.54081	9.02831	8.93561	8.9738	8.57324	8.61504	9.0043	8.62789	8.97924	8.73086	0.351344	0.00487835	0.113335	0.102967	0.538096	0.422963
AT1G15800		0	chr1	5441082	5443684	9.18227	9.03825	9.10944	9.10034	9.26725	9.27211	9.02368	8.99175	9.06214	9.10999	9.21323	9.02586	0.103248	0.220928	0.315926	-0.0841275	0.169702	0.273801
AT1G15810	S15/NS1, RNA-binding protein	1	chr1	5444418	5446564	11.0454	11.2586	11.3285	11.0086	11.0011	11.0954	11.0614	11.0356	11.0522	11.2108	11.035	11.0497	-0.175815	0.165118	0.286405	-0.161095	0.198192	0.288829
AT1G15820	light harvesting complex photosystem II subunit 6	0	chr1	5446462	5447859	6.44279	6.62775	6.53198	6.51236	6.63685	6.79097	6.86847	6.86115	6.73861	6.53417	6.64673	6.82274	0.112555	0.318003	0.363907	0.288572	0.0148052	0.173956
AT1G15825	hydroxyproline-rich glycoprotein family protein	0	chr1	5448149	5448529	5.34229	5.85097	5.72326	5.52544	5.19513	5.78995	5.5413	5.29435	5.31173	5.63884	5.50351	5.38246	-0.135336	0.588458	0.470033	-0.256382	0.233112	0.304045
AT1G15830		1	chr1	5448726	5450177	8.19516	7.98107	8.05483	8.23455	8.42369	8.22289	8.16444	8.19657	8.45492	8.07702	8.29371	8.27197	0.216692	0.0747441	0.222555	0.194956	0.164239	0.271722
AT1G15840		1	chr1	5451432	5452374	4.55886	4.97648	4.83387	4.50589	5.02827	4.50436	4.48835	4.88361	4.83255	4.78974	4.67951	4.73484	-0.11023	0.635265	0.485471	-0.0548944	0.768725	0.496336
AT1G15850	Transducin/WD40 repeat-like superfamily protein	0	chr1	5453245	5454088	6.12159	6.11083	6.55537	5.90395	6.07622	6.07196	6.2555	5.79113	6.2681	6.2626	6.01738	6.10491	-0.245217	0.230326	0.320408	-0.157686	0.503464	0.410611
AT1G15860	Domain of unknown function (DUF298)	1	chr1	5454785	5457022	8.64741	8.63741	8.33906	8.67244	8.7439	8.69717	8.71343	8.76565	8.91543	8.54129	8.7045	8.79817	0.163209	0.245206	0.327962	0.256874	0.110038	0.24159
AT1G15870	Mitochondrial glycoprotein family protein	1	chr1	5457084	5458429	7.23785	7.51447	7.57321	7.25408	7.48151	7.58878	7.37431	7.38797	7.11637	7.44184	7.44145	7.29288	-0.000391121	0.997948	0.588639	-0.148963	0.336281	0.347716
AT1G15880	golgi snare 11	0	chr1	5458535	5460333	10.8765	10.845	10.8975	10.9256	10.8368	10.9337	10.8712	10.9139	10.7593	10.873	10.8987	10.8481	0.025708	0.51254	0.443496	-0.02486	0.65145	0.460452
AT1G15885		1	chr1	5460477	5461281	8.42261	8.41285	8.41578	8.36847	8.28207	8.29469	8.67463	8.53001	8.67562	8.41708	8.31508	8.62675	-0.102001	0.0616608	0.211324	0.209673	0.0488572	0.203992
AT1G15890	Disease resistance protein (CC-NBS-LRR class) family	1	chr1	5461317	5464223	7.8054	8.03182	7.831	8.16365	8.08514	8.20987	7.99572	8.12866	8.02376	7.88941	8.15288	8.04938	0.263475	0.0470952	0.195809	0.15997	0.142295	0.259372
AT1G15900		1	chr1	5464356	5464697	5.54862	5.88443	5.84244	5.95539	5.62014	5.77353	5.69036	5.88853	6.05977	5.7585	5.78302	5.87956	0.0245227	0.872527	0.557163	0.121061	0.465349	0.396845
AT1G15910	XH/XS domain-containing protein	1	chr1	5465336	5469125	9.92682	10.0047	10.2131	9.95688	9.92093	9.93262	9.65607	9.64562	9.61299	10.0482	9.93681	9.63823	-0.111388	0.321756	0.365562	-0.40997	0.0381601	0.196907
AT1G15920	Polynucleotidyl transferase, ribonuclease H-like superfamily protein	1	chr1	5469389	5471149	11.3649	11.3393	11.2933	11.4038	11.5272	11.4644	11.3341	11.3555	11.2076	11.3325	11.4651	11.2991	0.132632	0.0440779	0.192467	-0.033455	0.559643	0.429998
AT1G15930	Ribosomal protein L7Ae/L30e/S12e/Gadd45 family protein	1	chr1	5471400	5473014	13.299	13.4147	13.5896	13.2731	13.3423	13.442	13.166	13.1939	13.0725	13.4344	13.3525	13.1441	-0.0818983	0.459566	0.422731	-0.2903	0.0581859	0.210886
AT1G15940	Tudor/PWWP/MBT superfamily protein	1	chr1	5473565	5478259	10.2776	10.437	10.5581	10.2826	10.304	10.3821	10.273	10.3228	10.1166	10.4242	10.3229	10.2375	-0.101355	0.340011	0.373646	-0.186774	0.146661	0.261361
AT1G15950	cinnamoyl coa reductase 1	1	chr1	5478754	5482180	13.7371	13.6821	13.6644	13.8071	13.708	13.7323	13.7698	13.8235	13.7323	13.6945	13.7492	13.7752	0.0546109	0.220114	0.315388	0.0806592	0.0809476	0.225395
AT1G15960	NRAMP metal ion transporter 6	0	chr1	5481665	5485082	7.25191	7.09051	7.25551	7.16302	7.02475	6.99326	7.02808	6.92222	6.94795	7.19931	7.06034	6.96608	-0.138969	0.139056	0.270507	-0.233229	0.0302898	0.189849
AT1G15970	DNA glycosylase superfamily protein	0	chr1	5486319	5488868	8.77303	8.74517	8.7717	8.63862	8.71458	8.73577	8.59306	8.77952	8.59718	8.7633	8.69632	8.65659	-0.0669738	0.141748	0.272506	-0.10671	0.222867	0.29947
AT1G15980	NDH-dependent cyclic electron flow 1	1	chr1	5489298	5491363	5.70822	5.64445	5.9402	5.94485	5.89078	5.89892	5.66237	5.48857	5.85318	5.76429	5.91152	5.66804	0.147229	0.240523	0.32594	-0.0962503	0.526027	0.41915
AT1G15990	cyclic nucleotide gated channel 7	0	chr1	5491304	5493772	5.58917	5.66357	5.80067	5.79964	5.57813	5.70247	5.97121	5.66182	5.70641	5.68447	5.69342	5.77981	0.00894681	0.924887	0.570729	0.0953437	0.460161	0.395028
AT1G16000		1	chr1	5494533	5495359	11.7648	11.8394	11.9363	11.6167	11.7365	11.8545	11.7865	11.7615	11.3883	11.8468	11.7359	11.6454	-0.11096	0.266747	0.339482	-0.201431	0.254416	0.314064
AT1G16010	magnesium transporter 2	0	chr1	5495373	5497723	10.939	10.9418	10.9976	11.0302	10.9301	11.0413	10.9183	10.998	10.9678	10.9595	11.0005	10.9614	0.0410788	0.380236	0.390198	0.00190039	0.952775	0.546676
AT1G16020	Protein of unknown function (DUF1712)	1	chr1	5498165	5501358	6.74012	7.27728	7.21206	7.06746	6.97858	7.26331	7.12359	7.22767	6.9617	7.07649	7.10312	7.10432	0.0266339	0.897049	0.563929	0.0278324	0.891219	0.530307
AT1G16022		0	chr1	5501396	5501959	7.71147	7.8043	7.55813	7.68381	7.74517	7.73529	7.48618	7.6106	7.36381	7.6913	7.72142	7.48686	0.0301237	0.719934	0.512414	-0.204438	0.113301	0.242447
AT1G16025		1	chr1	5501505	5501959	5.04298	4.94873	5.06361	5.1612	5.0153	4.7806	5.10127	5.31571	4.99903	5.01844	4.9857	5.13867	-0.0327342	0.800902	0.536766	0.120235	0.327644	0.344205
AT1G16030	heat shock protein 70B	0	chr1	5502206	5504535	7.50655	7.71618	7.4632	7.79764	7.59059	7.75012	7.582	7.702	7.65857	7.56198	7.71278	7.64752	0.150804	0.20972	0.310353	0.085544	0.396742	0.372342
AT1G16040		1	chr1	5504735	5506611	9.53942	9.4415	9.56905	9.53611	9.60277	9.55127	9.41265	9.4449	9.65713	9.51666	9.56338	9.50489	0.046726	0.361007	0.382628	-0.0117638	0.899798	0.53307
AT1G16060	ARIA-interacting double AP2 domain protein	1	chr1	5508507	5511735	10.1735	10.1586	10.2164	10.2772	10.3626	10.273	10.1998	10.1719	9.95539	10.1828	10.3043	10.109	0.121433	0.0327183	0.178637	-0.0738186	0.441641	0.388521
AT1G16070	tubby like protein 8	0	chr1	5511873	5513896	6.87331	7.04775	7.19961	7.03619	7.23229	6.84981	7.4406	7.64738	7.2341	7.04022	7.03943	7.4407	-0.000791269	0.995919	0.588193	0.400471	0.0611384	0.213485
AT1G16080		1	chr1	5514317	5516027	8.2636	8.33153	8.24938	8.45708	8.33573	8.33789	8.29257	8.2407	8.36819	8.2815	8.3769	8.30049	0.0954001	0.12752	0.262305	0.0189843	0.696608	0.474762
AT1G16090	wall associated kinase-like 7	1	chr1	5516259	5517822	6.54888	6.82532	6.61419	6.6221	6.43605	6.62795	6.71057	6.58674	6.65819	6.6628	6.56203	6.65183	-0.100763	0.393497	0.396202	-0.0109611	0.912295	0.536193
AT1G16110	wall associated kinase-like 6	1	chr1	5518373	5520891	7.56833	7.5123	7.39653	7.59867	7.65795	7.77768	7.54966	7.48554	7.66428	7.49239	7.6781	7.56649	0.185709	0.063838	0.213016	0.0741016	0.366025	0.360257
AT1G16120	wall associated kinase-like 1	1	chr1	5522639	5524983	7.44849	7.62825	7.17585	7.60885	7.50836	7.51783	7.62773	7.86259	7.64564	7.41753	7.54501	7.71199	0.127484	0.436535	0.413695	0.294457	0.141981	0.259175
AT1G16130	wall associated kinase-like 2	1	chr1	5525491	5528212	8.31372	8.47013	7.99476	8.56065	8.63467	8.71997	8.53356	8.50916	8.90251	8.25954	8.63843	8.64841	0.378895	0.101822	0.244679	0.388873	0.109502	0.241302
AT1G16140		1	chr1	5528965	5531255	7.65701	7.55127	7.25634	7.61518	7.7427	7.97062	8.00022	8.25921	8.30949	7.48821	7.77617	8.18964	0.287962	0.145195	0.274235	0.701435	0.0114573	0.170854
AT_1_+_0_5531959-5532096		1	chr1	5531965	5532102	5.49729	5.2636	5.32337	5.09024	5.07465	5.06821	4.87602	5.00139	5.45397	5.36142	5.0777	5.11046	-0.28372	0.0548004	0.204724	-0.250959	0.288	0.328557
AT1G16150	wall associated kinase-like 4	1	chr1	5532415	5534877	9.52353	9.27698	9.00518	9.27117	9.23432	9.28612	9.43449	9.55909	9.51738	9.26856	9.26387	9.50365	-0.00469233	0.977904	0.583829	0.235087	0.253674	0.313674
AT1G16160	wall associated kinase-like 5	1	chr1	5535973	5538269	8.65842	8.51262	8.31372	8.28435	8.35468	8.40665	8.24302	8.51834	8.40696	8.49492	8.34856	8.38944	-0.146358	0.278006	0.345175	-0.105479	0.458144	0.3943
AT1G16170		0	chr1	5538732	5539821	11.1921	10.9997	10.984	11.2866	11.3759	11.3865	11.3586	11.3393	11.4565	11.0586	11.3496	11.3848	0.291043	0.0320641	0.177945	0.326199	0.0220936	0.18358
AT1G16180	Serinc-domain containing serine and sphingolipid biosynthesis protein	1	chr1	5540427	5542902	7.63147	7.83565	7.63285	8.03613	7.90157	7.87155	7.88483	8.05382	8.2045	7.69999	7.93642	8.04771	0.236427	0.0536784	0.20363	0.347725	0.0431356	0.200801
AT1G16190	Rad23 UV excision repair protein family	1	chr1	5543152	5546103	9.51132	9.68651	9.83768	9.51808	9.47158	9.49956	9.55481	9.57755	9.31823	9.6785	9.49641	9.48353	-0.182095	0.191049	0.300183	-0.194974	0.196573	0.288262
AT1G16210		0	chr1	5546128	5547552	10.9433	10.9477	10.9522	11.0211	11.0489	11.0549	11.194	11.2214	11.417	10.9477	11.0416	11.2775	0.0939092	0.00890582	0.128262	0.329752	0.0423079	0.199716
AT1G16220	Protein phosphatase 2C family protein	1	chr1	5548653	5550553	7.12887	7.29868	7.25984	7.41682	7.44984	7.42766	7.4864	7.34215	7.14649	7.22913	7.43144	7.32501	0.20231	0.0543404	0.204211	0.0958824	0.451306	0.392259
AT1G16225	Target SNARE coiled-coil domain protein	0	chr1	5551041	5552097	8.32362	8.06117	7.89739	7.83148	7.98161	7.82738	7.72785	7.61225	7.85566	8.09406	7.88016	7.73192	-0.213903	0.220691	0.315671	-0.362139	0.0804874	0.225134
AT1G16230	Target SNARE coiled-coil domain protein	0	chr1	5553467	5554324	6.15973	6.21928	6.16918	6.01196	6.20393	5.96548	6.07065	6.2073	6.07262	6.18273	6.06046	6.11686	-0.122273	0.231695	0.321132	-0.0658714	0.281224	0.325792
AT1G16240	syntaxin of plants 51	0	chr1	5555007	5556841	12.4083	12.1391	12.1749	12.4517	12.4448	12.4303	12.3988	12.3866	12.3847	12.2408	12.4423	12.39	0.201477	0.138925	0.270507	0.149245	0.218822	0.297422
AT1G16250	Galactose oxidase/kelch repeat superfamily protein	1	chr1	5556989	5559520	7.069	7.1587	7.34699	7.57745	7.46163	7.40573	7.35327	7.52388	7.42051	7.19156	7.4816	7.43255	0.290041	0.0499076	0.199723	0.240991	0.0789811	0.223771
AT1G16260	Wall-associated kinase family protein	0	chr1	5559579	5562113	7.15768	7.22174	6.81075	7.94242	7.80955	8.12401	7.46353	7.41583	7.55296	7.06339	7.95866	7.47744	0.89527	0.00628401	0.120782	0.414049	0.0720729	0.219725
AT1G16270	Protein kinase superfamily protein with octicosapeptide/Phox/Bem1p domain	1	chr1	5563087	5568368	9.78713	9.99443	9.96418	9.74263	9.67846	9.81557	9.8191	9.81991	9.782	9.91524	9.74555	9.807	-0.16969	0.102661	0.245154	-0.10824	0.233292	0.304121
AT1G16280	RNA helicase 36	0	chr1	5568482	5570487	8.56599	8.76083	8.90322	8.89304	8.70454	8.92386	8.76083	9.08402	8.83029	8.74335	8.84048	8.89172	0.09713	0.466457	0.425143	0.148367	0.344603	0.351892
AT1G16290		0	chr1	5570753	5573538	4.93034	4.91478	5.13861	4.96676	5.08545	4.97371	4.72596	4.81809	5.07865	4.99458	5.00864	4.87424	0.0140641	0.874207	0.557582	-0.120341	0.406544	0.376282
[truncated: 35,132 more rows]
