# Supplementary material for: Two-step regulation of centromere distribution by condensin II and the nuclear envelope proteins
Source: Research Square preprint supplement (doi:10.21203/rs.3.rs-793150/v1), 2021-09-30
Supplement: Supplementary file 4 [file da34792fab8994c5e3b32308.xlsx]

## Sheet: Sheet1
						log2																		FDR
						Col-0_0h		cap-h2-2_0h		crwn1/4_0h		Col-0_1h		cap-h2-2_1h		crwn1/4_1h		Col-0_3h		cap-h2-2_3h		crwn1/4_3h		0h				1h				3h
		strand (1:+, 0:-)	chromosome	start	end	average	s.d	average	s.d	average	s.d	average	s.d	average	s.d	average	s.d	average	s.d	average	s.d	average	s.d	Col0 vs cap h	FDR	Col0 vs crwn	FDR	Col0 vs cap h	FDR	Col0 vs cap crwn	FDR	Col0 vs cap h	FDR	Col0 vs cap crwn	FDR
AT1G01010	NAC domain containing protein 1	1	chr1	3631	5899	8.40479	0.212492	8.77582	0.0874157	8.45556	0.250479	9.02197	0.268593	8.82604	0.433785	8.84257	0.0971238	9.73434	0.114612	9.45074	0.157383	9.27147	0.304244	0.37	0.22	0.05	0.92	-0.2	0.88	-0.18	0.74	-0.28	0.33	-0.46	0.33
AT1G01020	Arv1-like protein	0	chr1	5928	8737	10.1076	0.0954932	9.99308	0.120788	10.1031	0.116874	9.84812	0.0841106	9.84721	0.076747	9.89217	0.141301	9.94941	0.123557	9.89503	0.0877549	9.92941	0.128221	-0.11	0.53	0	0.99	0	1	0.04	0.89	-0.05	0.81	-0.02	0.95
CUFF.7		0	chr1	10002	10920	5.19992	0.190647	5.11802	0.104	5.18885	0.173724	5.08085	0.220247	5.19129	0.205145	5.34002	0.266127	5.22927	0.188093	4.88944	0.296868	5.25447	0.159956	-0.08	0.77	-0.01	0.98	0.11	0.89	0.26	0.69	-0.34	0.51	0.03	0.96
AT1G01030	AP2/B3-like transcriptional factor family protein	0	chr1	11649	13714	6.59442	0.136294	6.50795	0.174425	6.45313	0.102148	6.72325	0.148425	6.17738	0.195791	6.30048	0.16253	6.23159	0.351023	6.03546	0.115115	6.03111	0.116007	-0.09	0.76	-0.14	0.47	-0.55	0.3	-0.42	0.33	-0.2	0.73	-0.2	0.72
AT_1_-_0_14247-14375		0	chr1	14247	14375	5.40868	0.0910085	5.4159	0.212814	5.5321	0.146394	5.54261	0.119787	5.55036	0.19102	5.56832	0.203769	5.3749	0.174356	5.35071	0.209442	5.60753	0.0680067	0.01	0.98	0.12	0.54	0.01	0.99	0.03	0.96	-0.02	0.96	0.23	0.38
OMATPNEWGENE_1M_2615-200		0	chr1	19649	19858	5.12322	0.261236	5.07181	0.191014	4.90516	0.190957	5.16513	0.0883137	5.03058	0.224807	4.91453	0.140585	4.89223	0.130956	5.47443	0.734289	5.03332	0.206636	-0.05	0.91	-0.22	0.56	-0.13	0.83	-0.25	0.43	0.58	0.6	0.14	0.7
AT1G01040	dicer-like 1	1	chr1	23146	31227	10.2989	0.109115	10.4431	0.173639	10.1441	0.147984	10.7669	0.199291	10.4208	0.237317	10.5498	0.185702	10.8038	0.142288	10.351	0.253951	10.4693	0.165452	0.14	0.55	-0.15	0.47	-0.35	0.59	-0.22	0.67	-0.45	0.31	-0.33	0.31
AT1G01046	MIR838a; miRNA	1	chr1	28500	28706	5.45272	0.348773	5.51532	0.245191	5.38661	0.0332113	5.45989	0.222593	5.2098	0.172603	5.46753	0.0877583	5.52107	0.128329	5.18859	0.165833	5.12237	0.331613	0.06	0.92	-0.07	0.89	-0.25	0.69	0.01	0.99	-0.33	0.3	-0.4	0.43
AT1G01050	pyrophosphorylase 1	0	chr1	31170	33153	12.5533	0.0551766	12.4348	0.0726793	12.5074	0.0415549	12.5217	0.157165	12.8108	0.135209	12.8218	0.0985491	12.3908	0.0757435	12.7108	0.115934	12.7139	0.15293	-0.12	0.29	-0.05	0.57	0.29	0.49	0.3	0.4	0.32	0.18	0.32	0.24
AT1G01060	Homeodomain-like superfamily protein	0	chr1	33379	37871	6.41409	0.441155	6.75117	0.0598311	6.62871	0.169938	6.19268	0.242738	5.91515	0.0867692	6.98898	1.73503	6.22888	0.252634	5.79295	0.15443	5.87054	0.196875	0.34	0.52	0.21	0.71	-0.28	0.61	0.8	0.8	-0.44	0.32	-0.36	0.43
AT1G01070	nodulin MtN21 /EamA-like transporter family protein	0	chr1	38752	40944	8.77674	0.286057	8.32517	0.189837	8.68721	0.0507402	9.16414	0.281429	9.52325	0.19765	9.6591	0.140658	8.75759	0.248371	8.73895	0.111567	8.6255	0.182534	-0.45	0.28	-0.09	0.81	0.36	0.62	0.49	0.41	-0.02	0.97	-0.13	0.77
AT1G01073		1	chr1	44677	44787	6.75191	0.126437	6.95082	0.194629	6.99458	0.318484	7.06311	0.326323	7.04142	0.18252	6.77176	0.197096	6.86305	0.0889845	6.88772	0.322619	7.07673	0.162599	0.2	0.47	0.24	0.54	-0.02	0.99	-0.29	0.68	0.02	0.97	0.21	0.41
AT1G01080	RNA-binding (RRM/RBD/RNP motifs) family protein	0	chr1	45296	47019	7.69904	0.179516	7.31104	0.0718618	7.34672	0.203745	7.54089	0.187791	7.57362	0.171579	7.72394	0.106585	7.82117	0.0817776	7.80602	0.136628	7.69052	0.155231	-0.39	0.16	-0.35	0.29	0.03	0.97	0.18	0.65	-0.02	0.96	-0.13	0.61
AT1G01090	pyruvate dehydrogenase E1 alpha	0	chr1	47485	49286	12.2917	0.249871	12.313	0.10495	12.3674	0.0789766	12.2654	0.231944	12.3017	0.181216	12.4246	0.0401619	12.3398	0.16405	12.3576	0.128316	12.3946	0.236166	0.02	0.96	0.08	0.83	0.04	0.97	0.16	0.72	0.02	0.96	0.05	0.91
AT1G01100	60S acidic ribosomal protein family	0	chr1	50075	51199	15.2023	0.13734	15.0669	0.152058	15.1975	0.110589	14.7461	0.225904	14.7945	0.123395	14.8422	0.155499	14.6917	0.0422058	14.6618	0.251954	14.936	0.247631	-0.14	0.58	0	0.99	0.05	0.95	0.1	0.85	-0.03	0.95	0.24	0.49
AT1G01110	IQ-domain 18	1	chr1	52239	54692	8.87356	0.101784	8.78609	0.069043	8.96458	0.154333	8.72183	0.110775	8.76776	0.230204	8.88992	0.219622	8.15227	0.29128	8.49778	0.284758	8.39054	0.228379	-0.09	0.55	0.09	0.68	0.05	0.95	0.17	0.72	0.35	0.56	0.24	0.66
AT1G01115		1	chr1	56624	56740	5.29637	0.134317	5.46309	0.179864	5.58317	0.142765	5.82002	0.175671	5.95285	0.874458	5.39462	0.25484	5.56094	0.493756	5.61067	0.168239	5.87933	0.741202	0.17	0.53	0.29	0.25	0.13	0.96	-0.43	0.46	0.05	0.96	0.32	0.82
AT1G01120	3-ketoacyl-CoA synthase 1	0	chr1	57269	59167	11.1449	0.131206	11.389	0.204566	11.3469	0.0855574	11.2434	0.230849	10.8613	0.312921	11.0476	0.158841	11.3653	0.156207	11.0148	0.153106	11.3408	0.256271	0.24	0.4	0.2	0.29	-0.38	0.65	-0.2	0.71	-0.35	0.29	-0.02	0.96
AT1G01130		0	chr1	61905	63811	6.40373	0.231444	6.36999	0.208749	6.48761	0.34111	6.57162	0.147483	6.59267	0.103247	6.61652	0.173021	6.34939	0.286016	6.54219	0.0535775	6.46656	0.129348	-0.03	0.94	0.08	0.89	0.02	0.97	0.04	0.92	0.19	0.66	0.12	0.81
AT1G01140	CBL-interacting protein kinase 9	0	chr1	64166	67625	6.85602	0.292434	6.89145	0.2523	7.22623	0.290152	6.87058	0.216374	7.00785	0.1919	7.11962	0.248361	6.53376	0.19027	6.79714	0.0654709	6.88659	0.277242	0.04	0.95	0.37	0.44	0.14	0.85	0.25	0.68	0.26	0.37	0.35	0.46
AT1G01150	Homeodomain-like protein with RING/FYVE/PHD-type zinc finger domain	0	chr1	70115	72138	4.82189	0.153963	5.1885	0.173622	4.93864	0.127343	5.1581	0.12366	5.20189	0.148597	5.23372	0.235024	5.72353	0.775154	5.24968	0.162977	5.14768	0.165499	0.37	0.23	0.12	0.62	0.04	0.93	0.08	0.88	-0.47	0.69	-0.58	0.62
AT1G01160	GRF1-interacting factor 2	1	chr1	72339	74096	9.65124	0.0789488	9.52856	0.145863	9.65652	0.0354757	9.61824	0.0604745	9.6645	0.0996526	9.67413	0.105717	9.53545	0.128485	9.52504	0.130403	9.59777	0.0881559	-0.12	0.53	0.01	0.97	0.05	0.88	0.06	0.8	-0.01	0.98	0.06	0.79
AT1G01170	Protein of unknown function (DUF1138)	0	chr1	73931	74737	7.52183	0.0980049	7.4524	0.118568	7.24912	0.0767296	7.9238	0.128362	8.2163	0.0473138	7.98137	0.267971	8.184	0.0982963	8.63537	0.579962	8.11892	0.166537	-0.07	0.72	-0.27	0.15	0.29	0.31	0.06	0.93	0.45	0.61	-0.07	0.83
AT1G01180	S-adenosyl-L-methionine-dependent methyltransferases superfamily protein	1	chr1	75583	76758	9.72036	0.0187101	9.89413	0.0488237	9.59679	0.0973311	10.5507	0.167353	10.678	0.26529	10.5908	0.195267	11.3272	0.224083	11.2617	0.200576	10.8983	0.214376	0.17	0.08	-0.12	0.31	0.13	0.88	0.04	0.94	-0.07	0.89	-0.43	0.34
CUFF.81		0	chr1	77385	78328	5.72889	0.159401	5.78641	0.20603	5.78661	0.0995837	5.73946	0.145093	5.62656	0.0929675	5.91315	0.323336	5.72554	0.357365	5.73983	0.240332	5.71043	0.160747	0.06	0.87	0.06	0.81	-0.11	0.8	0.17	0.79	0.01	0.99	-0.02	0.98
AT_1_-_2_78181-78321		0	chr1	78181	78321	7.40182	0.232404	7.71641	0.140802	7.62087	0.16359	7.6913	0.181533	7.35031	0.139411	7.48238	0.204663	7.5541	0.335045	7.21833	0.204105	7.30764	0.240861	0.31	0.34	0.22	0.51	-0.34	0.47	-0.21	0.68	-0.34	0.56	-0.25	0.68
AT1G01183	MIR165/MIR165A; miRNA	0	chr1	78932	79032	5.0484	0.227742	5.18585	0.114682	5.06133	0.0748249	5.15555	0.361602	5.18259	0.128699	5.27967	0.0837815	5.12895	0.286062	5.23079	0.0728814	5.06104	0.13272	0.14	0.66	0.01	0.97	0.03	0.98	0.12	0.86	0.1	0.82	-0.07	0.89
CUFF.85		1	chr1	79560	79961	5.11952	0.241526	5.0279	0.310645	5.12761	0.0992153	5.56993	0.402802	5.73301	0.485737	5.51517	0.502357	5.72807	0.501627	5.45816	0.34226	5.40435	0.298793	-0.09	0.87	0.01	0.98	0.16	0.92	-0.05	0.97	-0.27	0.77	-0.32	0.71
CUFF.87		1	chr1	80076	80403	5.07008	0.113542	5.09319	0.125953	5.09257	0.0471637	5.45138	0.249097	5.32139	0.0717739	5.19261	0.148337	5.26557	0.0586946	5.21681	0.104986	5.27815	0.136779	0.02	0.93	0.02	0.9	-0.13	0.85	-0.26	0.63	-0.05	0.79	0.01	0.96
CUFF.89		1	chr1	80504	81321	5.47607	0.0935692	5.48789	0.146972	5.57072	0.168956	5.6464	0.227264	5.62186	0.157908	5.7107	0.0707102	5.7072	0.228648	5.64368	0.28973	5.69397	0.105612	0.01	0.97	0.09	0.69	-0.02	0.98	0.06	0.89	-0.06	0.92	-0.01	0.98
AT_1_-_2_80593-80688		0	chr1	80593	80688	5.06769	0.304049	5.08025	0.225759	4.98511	0.0670047	5.26219	0.174651	5.37737	0.0833212	5.21105	0.12152	5.05193	0.303368	5.14468	0.068603	5.18473	0.0896588	0.01	0.98	-0.08	0.84	0.12	0.82	-0.05	0.9	0.09	0.85	0.13	0.78
AT_1_+_0_82621-82713		1	chr1	82621	82713	5.08076	0.168115	5.00144	0.187342	4.95662	0.138791	5.11021	0.189875	5.02555	0.252143	5.3064	0.0611202	5.02271	0.222011	5.12805	0.126193	5.18232	0.564054	-0.08	0.81	-0.12	0.63	-0.08	0.92	0.2	0.59	0.11	0.79	0.16	0.87
AT1G01190	cytochrome P450, family 78, subfamily A, polypeptide 8	0	chr1	83045	84864	10.2226	0.67858	11.0054	0.0659683	10.7107	0.146485	9.93296	0.244244	9.26099	0.720682	9.69694	0.0599736	10.998	0.172779	10.7613	0.133929	11.3844	0.235681	0.78	0.34	0.49	0.54	-0.67	0.7	-0.24	0.61	-0.24	0.45	0.39	0.36
AT1G01200	RAB GTPase homolog A3	0	chr1	86515	88213	7.11394	0.0921158	6.99033	0.0579014	6.96613	0.155153	7.33117	0.124812	7.19192	0.252486	7.29041	0.0879454	6.95507	0.140455	6.96411	0.129887	7.07219	0.226783	-0.12	0.34	-0.15	0.48	-0.14	0.85	-0.04	0.89	0.01	0.98	0.12	0.77
AT1G01210	DNA-directed RNA polymerase, subunit M, archaeal	1	chr1	88898	89745	6.19369	0.0749563	5.74108	0.0944137	5.65164	0.0865123	6.08553	0.312298	5.52858	0.129352	5.77731	0.203089	6.04591	0.172599	5.67715	0.374109	5.50814	0.116607	-0.45	0.06	-0.54	0.06	-0.56	0.43	-0.31	0.65	-0.37	0.54	-0.54	0.14
AT_1_-_1_90227-90406		0	chr1	90227	90406	6.36885	0.14363	6.46295	0.207321	6.50592	0.0558922	6.50937	0.249877	6.52929	0.24006	6.53385	0.171522	6.60058	0.13656	6.3214	0.0723258	6.49835	0.269321	0.09	0.77	0.14	0.44	0.02	0.99	0.02	0.97	-0.28	0.25	-0.1	0.83
AT1G01220	L-fucokinase/GDP-L-fucose pyrophosphorylase	1	chr1	91376	95651	9.78201	0.224476	9.96469	0.0497041	9.99997	0.0740433	10.1414	0.246791	10.1559	0.0928528	10.2476	0.132761	11.4145	0.0551595	11.208	0.147568	11.2395	0.178475	0.18	0.5	0.22	0.43	0.01	0.99	0.11	0.84	-0.21	0.37	-0.18	0.51
AT1G01225	NC domain-containing protein-related	1	chr1	95987	97407	7.68261	0.163953	7.82221	0.114412	7.68553	0.0633928	7.72703	0.0507731	7.6065	0.179358	7.69904	0.11809	7.80658	0.153945	7.90503	0.0547862	7.87184	0.10869	0.14	0.56	0	0.99	-0.12	0.8	-0.03	0.91	0.1	0.69	0.07	0.82
AT1G01230	ORMDL family protein	1	chr1	97456	99240	11.5299	0.0979012	11.4214	0.12842	11.4944	0.0508904	11.2016	0.208872	11.2591	0.141065	11.2661	0.0830353	10.96	0.135472	10.9524	0.162072	10.9692	0.0821242	-0.11	0.57	-0.04	0.8	0.06	0.93	0.06	0.88	-0.01	0.99	0.01	0.98
AT1G01240		1	chr1	99894	101834	11.1632	0.134945	11.2412	0.0774178	11.1548	0.0433884	11.2183	0.151611	11.2571	0.17912	11.4192	0.161239	11.0457	0.200864	11.2374	0.0897246	10.9568	0.137452	0.08	0.68	-0.01	0.97	0.04	0.95	0.2	0.62	0.19	0.55	-0.09	0.81
AT1G01250	Integrase-type DNA-binding superfamily protein	0	chr1	104491	105330	4.60086	0.169988	4.8976	0.169932	4.73881	0.140251	4.73142	0.194706	4.74344	0.221616	4.93577	0.114759	4.81477	0.159007	4.93143	0.311541	4.8723	0.325015	0.3	0.31	0.14	0.59	0.01	0.99	0.2	0.62	0.12	0.83	0.06	0.93
AT1G01260	basic helix-loop-helix (bHLH) DNA-binding superfamily protein	1	chr1	108946	111609	8.90045	0.120612	9.03854	0.0861705	9.14014	0.0368484	8.99586	0.0751964	8.81412	0.0777522	8.89259	0.107147	8.74267	0.196773	8.59826	0.122407	8.689	0.0921216	0.14	0.43	0.24	0.18	-0.18	0.42	-0.1	0.67	-0.14	0.68	-0.05	0.88
AT1G01270	pre-tRNA	0	chr1	111890	111961	7.74487	0.140131	7.90695	0.12359	7.44666	0.236401	7.92223	0.428466	7.80255	0.493881	7.75364	0.289113	8.04264	0.369204	8.01174	0.324765	7.84811	0.500588	0.16	0.46	-0.3	0.36	-0.12	0.95	-0.17	0.86	-0.03	0.97	-0.19	0.84
AT1G01280	cytochrome P450, family 703, subfamily A, polypeptide 2	1	chr1	112263	113947	4.93555	0.228162	4.91494	0.414202	5.11505	0.126371	5.25126	0.154176	5.00308	0.38441	5.03282	0.208189	5.03856	0.256937	5.27809	0.557142	5.30625	0.382688	-0.02	0.98	0.18	0.55	-0.25	0.81	-0.22	0.65	0.24	0.8	0.27	0.69
AT1G01290	cofactor of nitrate reductase and xanthine dehydrogenase 3	1	chr1	114286	116108	10.1493	0.171376	10.1748	0.121831	10.1138	0.0630349	10.2148	0.15793	10.1938	0.0292252	10.2531	0.203214	10.2236	0.170902	10.1822	0.194236	10.3357	0.157729	0.03	0.94	-0.04	0.89	-0.02	0.97	0.04	0.94	-0.04	0.93	0.11	0.75
AT1G01300	Eukaryotic aspartyl protease family protein	1	chr1	116943	118764	9.98361	0.322265	10.1052	0.200792	10.1948	0.0486207	10.3495	0.120148	9.96148	0.320478	10.2272	0.148457	9.98589	0.065331	9.7798	0.19643	10.2199	0.0502556	0.12	0.81	0.21	0.58	-0.39	0.59	-0.12	0.73	-0.21	0.49	0.23	0.12
AT1G01305		1	chr1	119397	119997	4.67752	0.252073	4.80691	0.237013	4.58016	0.385863	4.96378	0.907952	4.91537	0.965989	4.50591	0.20099	4.74461	0.250066	4.70455	0.321684	4.37187	0.248498	0.13	0.77	-0.1	0.88	-0.05	0.99	-0.46	0.79	-0.04	0.96	-0.37	0.45
AT1G01310	CAP (Cysteine-rich secretory proteins, Antigen 5, and Pathogenesis-related 1 protein) superfamily protein	1	chr1	120154	121130	6.68762	0.128494	7.09557	0.191905	6.99189	0.189205	7.73199	0.305291	7.58865	0.41763	7.87376	0.69914	7.56812	0.484648	7.65689	0.211767	8.2313	1.00387	0.41	0.19	0.3	0.28	-0.14	0.92	0.14	0.93	0.09	0.92	0.66	0.69
AT1G01320	Tetratricopeptide repeat (TPR)-like superfamily protein	0	chr1	121067	130577	6.80638	0.109375	6.87295	0.0735063	6.76352	0.053092	6.73204	0.125166	6.74303	0.262503	6.94101	0.0554465	7.13486	0.186167	6.90956	0.129888	6.82717	0.321864	0.07	0.68	-0.04	0.78	0.01	0.99	0.21	0.42	-0.23	0.49	-0.31	0.56
AT_1_+_2_131151-131312		1	chr1	131151	131312	5.43935	0.26855	5.56757	0.0738818	5.3921	0.038976	5.50621	0.359527	5.61166	0.164384	5.72019	0.445625	5.58075	0.299256	5.60336	0.0335323	5.48225	0.326792	0.13	0.71	-0.05	0.9	0.11	0.92	0.21	0.84	0.02	0.97	-0.1	0.89
AT1G01340	cyclic nucleotide gated channel 10	0	chr1	132328	135831	11.3017	0.194749	11.129	0.0997097	11.1898	0.0609238	11.3912	0.169586	11.3984	0.141075	11.3712	0.0811834	11.6047	0.161772	11.4782	0.0963549	11.4329	0.0889094	-0.17	0.5	-0.11	0.64	0.01	0.99	-0.02	0.96	-0.13	0.66	-0.17	0.51
AT1G01350	Zinc finger (CCCH-type/C3HC4-type RING finger) family protein	1	chr1	136124	138162	11.0048	0.112938	10.8834	0.132279	10.9455	0.0390501	10.9962	0.131305	11.0542	0.0744972	10.9486	0.0632324	10.9662	0.135707	10.9536	0.181085	10.9293	0.125011	-0.12	0.56	-0.06	0.68	0.06	0.88	-0.05	0.86	-0.01	0.98	-0.04	0.9
AT1G01355	Putative endonuclease or glycosyl hydrolase	1	chr1	138513	139568	5.17504	0.197402	5.24674	0.151636	5.23458	0.105118	5.40235	0.22052	5.45491	0.15151	5.64814	0.0994641	5.61178	0.189452	6.6891	2.34149	5.5379	0.236787	0.07	0.83	0.06	0.84	0.05	0.94	0.25	0.58	1.08	0.76	-0.07	0.88
AT_1_+_1_141395-141511		1	chr1	141395	141511	4.63074	0.174963	4.60778	0.182343	4.71755	0.161791	4.78618	0.0901946	4.71495	0.185738	4.88828	0.139017	4.73163	0.227992	4.68387	0.393048	4.89735	0.166629	-0.02	0.95	0.09	0.77	-0.07	0.89	0.1	0.74	-0.05	0.95	0.17	0.69
AT1G01360	regulatory component of ABA receptor 1	1	chr1	141971	143183	11.4938	0.16935	11.5891	0.163538	11.615	0.0801129	11.7465	0.114233	11.7452	0.0305213	11.9592	0.0516231	12.0516	0.138046	12.1227	0.101333	12.2216	0.063543	0.1	0.75	0.12	0.58	0	1	0.21	0.38	0.07	0.79	0.17	0.43
AT1G01370	Histone superfamily protein	1	chr1	143564	145684	9.16922	0.0689538	9.00294	0.116534	9.09784	0.129296	8.8109	0.253961	8.94918	0.118203	8.85194	0.0787948	8.82958	0.308064	9.12332	0.205101	9.06211	0.0233119	-0.17	0.31	-0.07	0.69	0.14	0.85	0.04	0.94	0.29	0.59	0.23	0.6
AT1G01380	Homeodomain-like superfamily protein	1	chr1	147153	147942	8.32228	0.438529	8.04571	0.043268	7.88491	0.19963	9.10305	0.19705	8.6927	0.330162	8.58685	0.054029	8.94826	0.113438	8.9014	0.0725269	8.96216	0.0685517	-0.28	0.6	-0.44	0.43	-0.41	0.62	-0.52	0.24	-0.05	0.82	0.01	0.95
AT1G01390	UDP-Glycosyltransferase superfamily protein	0	chr1	148120	149806	4.97903	0.276642	5.00813	0.15978	5.19436	0.106664	5.36039	0.0868706	5.24541	0.104566	5.61428	0.277019	5.38519	0.183903	5.36326	0.132649	5.29491	0.200422	0.03	0.95	0.22	0.53	-0.11	0.71	0.25	0.63	-0.02	0.96	-0.09	0.83
AT1G01400		0	chr1	150689	152210	4.99047	0.100079	4.96203	0.282962	5.00336	0.11679	5.26673	0.107566	5.1713	0.162152	5.16938	0.206295	5.30288	0.152713	5.26377	0.240587	5.07758	0.0736466	-0.03	0.95	0.01	0.96	-0.1	0.85	-0.1	0.82	-0.04	0.94	-0.23	0.36
AT1G01410	pumilio 22	1	chr1	153113	154198	5.14177	0.225123	5.12604	0.18107	5.10809	0.151682	5.33277	0.237626	5.19518	0.17378	5.27076	0.226945	5.2711	0.292397	5.22518	0.100781	5.17033	0.185866	-0.02	0.97	-0.03	0.93	-0.14	0.86	-0.06	0.93	-0.05	0.93	-0.1	0.85
AT1G01420	UDP-glucosyl transferase 72B3	0	chr1	154492	156011	7.04993	0.357008	7.185	0.141475	7.08902	0.0769339	7.30567	0.113064	7.03085	0.116603	7.18414	0.266895	6.74249	0.145548	6.635	0.139499	6.69888	0.104173	0.14	0.79	0.04	0.94	-0.27	0.41	-0.12	0.82	-0.11	0.73	-0.04	0.88
AT1G01430	TRICHOME BIREFRINGENCE-LIKE 25	0	chr1	156801	158655	10.5146	0.413528	10.6687	0.163372	10.4067	0.0704764	10.9773	0.197958	10.6131	0.0362974	10.7901	0.108986	10.8	0.0669194	10.7035	0.0847145	10.7171	0.0449472	0.15	0.79	-0.11	0.85	-0.36	0.38	-0.19	0.65	-0.1	0.54	-0.08	0.47
AT1G01440	Protein of unknown function (DUF3133)	0	chr1	159856	162572	9.99121	0.10755	10.0264	0.0210674	9.79427	0.0973056	10.1969	0.0870985	10.0534	0.239225	10.1724	0.154744	10.179	0.169134	9.97465	0.0996011	9.87489	0.270524	0.04	0.81	-0.2	0.27	-0.14	0.83	-0.02	0.95	-0.2	0.47	-0.3	0.5
AT1G01448	other RNA	1	chr1	163419	166239	7.20943	0.129029	7.1932	0.27446	7.14261	0.0982272	6.84545	0.213523	6.86138	0.264157	7.08506	0.196371	6.89344	0.161829	6.89371	0.115257	6.74901	0.179069	-0.02	0.97	-0.07	0.74	0.02	0.99	0.24	0.65	0	1	-0.14	0.68
AT1G01450	Protein kinase superfamily protein	0	chr1	164105	165517	5.32039	0.0714411	5.36747	0.0432479	5.33859	0.119864	5.2788	0.134965	5.54014	0.264708	5.47305	0.143033	5.47795	0.295803	5.41724	0.3066	5.39998	0.188756	0.05	0.64	0.02	0.93	0.26	0.7	0.19	0.59	-0.06	0.93	-0.08	0.89
AT1G01453		0	chr1	166589	167842	6.75823	0.295932	6.89605	0.124639	7.44301	0.248341	6.9081	0.375741	6.64524	0.251145	7.0065	0.136397	7.51531	0.163878	7.54124	0.0400772	7.76057	0.217446	0.14	0.73	0.68	0.2	-0.26	0.82	0.1	0.9	0.03	0.93	0.25	0.53
AT_1_+_1_168227-168373		1	chr1	168227	168373	6.85906	0.241921	6.66233	0.0793155	6.60424	0.217588	6.60868	0.746572	6.66954	0.102425	6.31057	0.148472	6.50825	0.33167	6.68135	0.260287	6.71364	0.442918	-0.2	0.51	-0.25	0.5	0.06	0.98	-0.3	0.83	0.17	0.79	0.21	0.81
AT1G01460	Phosphatidylinositol-4-phosphate 5-kinase, core	1	chr1	168723	171165	5.14697	0.282179	5.24308	0.162697	5.24814	0.134556	5.3139	0.0821577	5.07838	0.419061	5.36002	0.398967	5.17564	0.285361	5.22119	0.134537	5.24996	0.0956417	0.1	0.83	0.1	0.8	-0.24	0.83	0.05	0.96	0.05	0.93	0.07	0.88
AT1G01470	Late embryogenesis abundant protein	0	chr1	172146	172948	15.0867	0.357492	15.2468	0.181912	14.9809	0.0215822	14.6966	0.125044	15.0866	0.198318	14.756	0.0951938	14.4296	0.0421069	14.6607	0.0830185	14.6174	0.046134	0.16	0.75	-0.11	0.82	0.39	0.42	0.06	0.84	0.23	0.16	0.19	0.11
AT1G01471		1	chr1	173251	173466	5.08342	0.294837	5.25882	0.113538	5.18526	0.177873	5.36168	0.0830091	5.14014	0.187445	5.28301	0.199967	5.11338	0.131894	5.1774	0.235041	5.31035	0.191968	0.18	0.65	0.1	0.82	-0.22	0.61	-0.08	0.85	0.06	0.88	0.2	0.56
AT1G01480	1-amino-cyclopropane-1-carboxylate synthase 2	1	chr1	175782	178400	8.59651	0.620619	8.79875	0.443016	8.28186	0.777877	9.52063	0.71841	8.75665	0.870625	8.73658	0.301638	9.1159	0.213938	8.96779	0.42902	9.03152	0.454599	0.2	0.85	-0.31	0.81	-0.76	0.79	-0.78	0.58	-0.15	0.84	-0.08	0.92
AT1G01490	Heavy metal transport/detoxification superfamily protein	0	chr1	180059	182358	11.793	0.112492	11.842	0.101889	11.7757	0.180064	11.9068	0.0907341	11.8603	0.144518	11.7387	0.0686128	11.7838	0.137853	11.6707	0.089371	11.6533	0.0680238	0.05	0.81	-0.02	0.96	-0.05	0.92	-0.17	0.44	-0.11	0.65	-0.13	0.55
AT1G01500	Erythronate-4-phosphate dehydrogenase family protein	1	chr1	185133	186923	8.68375	0.0898414	8.67293	0.0839842	8.4606	0.0298714	8.27397	0.350116	8.12628	0.298995	8.24734	0.231869	8.06789	0.153177	7.84195	0.247517	8.03457	0.0306513	-0.01	0.96	-0.22	0.14	-0.15	0.9	-0.03	0.98	-0.23	0.6	-0.03	0.9
AT1G01510	NAD(P)-binding Rossmann-fold superfamily protein	1	chr1	187211	190056	10.3907	0.0630018	10.4585	0.083274	10.5583	0.160638	10.2641	0.152355	10.1258	0.113104	10.194	0.0616752	10.0332	0.0206063	9.96524	0.0876894	10.0443	0.0752253	0.07	0.59	0.17	0.41	-0.14	0.76	-0.07	0.82	-0.07	0.61	0.01	0.93
AT1G01520	Homeodomain-like superfamily protein	1	chr1	190596	192139	5.29821	0.174734	5.32204	0.158865	5.02183	0.242409	5.37219	0.131572	5.31612	0.235058	5.34334	0.0989428	5.64787	0.46021	5.2919	0.256227	5.31771	0.179399	0.02	0.95	-0.28	0.43	-0.06	0.94	-0.03	0.93	-0.36	0.65	-0.33	0.65
AT1G01530	AGAMOUS-like 28	0	chr1	192640	193670	5.22283	0.169611	5.37227	0.139041	5.27268	0.172573	5.44615	0.304495	5.59031	0.181685	5.53185	0.215383	5.60011	0.243216	5.35484	0.135985	5.1915	0.305177	0.15	0.57	0.05	0.88	0.14	0.88	0.09	0.91	-0.25	0.55	-0.41	0.46
AT1G01540	Protein kinase superfamily protein	1	chr1	195780	198684	9.0752	0.138384	8.97187	0.0218332	8.9612	0.118108	9.32214	0.112064	9.39178	0.0491195	9.39817	0.0130422	8.99024	0.0301376	9.14031	0.147793	9.19651	0.105593	-0.1	0.53	-0.11	0.59	0.07	0.83	0.08	0.72	0.15	0.49	0.21	0.24
AT1G01550	Protein of unknown function (DUF793)	1	chr1	199639	201775	14.3902	0.149086	14.3931	0.159977	14.4251	0.136903	14.4423	0.0869523	14.3996	0.140804	14.4529	0.167113	14.4058	0.157409	14.31	0.18731	14.3051	0.167286	0	0.99	0.03	0.9	-0.04	0.92	0.01	0.98	-0.1	0.8	-0.1	0.77
AT1G01560	MAP kinase 11	1	chr1	202136	204335	6.95297	0.122417	7.16932	0.481618	7.14365	0.287119	7.13515	0.254136	7.3513	0.358277	7.18926	0.384219	7.58473	0.193769	7.15699	0.12994	7.50338	0.109083	0.22	0.73	0.19	0.6	0.22	0.85	0.05	0.96	-0.43	0.25	-0.08	0.81
AT1G01570	Protein of unknown function (DUF604)	1	chr1	205176	207435	6.40248	0.042828	6.64141	0.117211	6.57755	0.0931303	6.91605	0.178012	6.79975	0.233189	6.83886	0.12799	7.22538	0.163971	7.15986	0.342906	6.9452	0.143069	0.24	0.17	0.18	0.21	-0.12	0.88	-0.08	0.85	-0.07	0.92	-0.28	0.37
AT_1_-_2_207796-207999		0	chr1	207796	207999	5.25714	0.12005	5.21347	0.374908	5.08377	0.188455	5.41807	0.122569	5.46215	0.16072	5.74366	0.406449	5.38362	0.143088	5.52398	0.170612	5.32536	0.0500691	-0.04	0.94	-0.17	0.5	0.04	0.94	0.33	0.68	0.14	0.68	-0.06	0.8
AT1G01580	ferric reduction oxidase 2	1	chr1	209395	213041	8.14198	0.121469	7.90584	0.135081	7.86358	0.0908897	8.02362	0.125062	7.95407	0.274732	7.92626	0.160104	8.45121	0.198255	8.50492	0.100566	8.22328	0.229496	-0.24	0.29	-0.28	0.19	-0.07	0.93	-0.1	0.8	0.05	0.88	-0.23	0.6
AT1G01590	ferric reduction oxidase 1	1	chr1	214229	217304	5.79911	0.180055	5.37418	0.204459	5.71214	0.110501	5.44691	0.259479	5.21907	0.320131	5.31414	0.217809	5.21655	0.124318	5.46654	0.0559909	5.17595	0.298077	-0.42	0.23	-0.09	0.74	-0.23	0.83	-0.13	0.83	0.25	0.25	-0.04	0.94
AT1G01600	cytochrome P450, family 86, subfamily A, polypeptide 4	1	chr1	218994	221286	7.5113	0.298202	7.51024	0.122312	7.69474	0.0194531	8.86037	0.160969	8.5522	0.450444	8.61088	0.206588	9.15714	0.223538	9.10809	0.0433288	9.366	0.135893	0	1	0.18	0.6	-0.31	0.8	-0.25	0.6	-0.05	0.9	0.21	0.58
AT1G01610	glycerol-3-phosphate acyltransferase 4	0	chr1	221691	224340	8.61965	0.160164	8.87581	0.102387	8.71194	0.171704	9.31342	0.16287	8.94741	0.331489	9.05946	0.13705	9.90997	0.114635	9.62939	0.0737383	9.61666	0.0769098	0.26	0.28	0.09	0.75	-0.37	0.65	-0.25	0.51	-0.28	0.21	-0.29	0.2
AT1G01620	plasma membrane intrinsic protein 1C	0	chr1	225665	227302	11.9388	0.259896	11.853	0.145956	12.0178	0.158521	10.9493	0.364547	11.436	0.554896	11.3368	0.23535	10.4994	0.295669	10.9844	0.171177	10.6632	0.233608	-0.09	0.83	0.08	0.85	0.49	0.76	0.39	0.63	0.49	0.34	0.16	0.77
AT1G01630	Sec14p-like phosphatidylinositol transfer family protein	1	chr1	229013	230917	6.75509	0.186404	6.81868	0.229138	6.86486	0.272207	7.5659	0.859746	7.18181	0.194724	7.13976	0.247141	7.02457	0.154726	7.27747	0.174369	7.20036	0.188146	0.06	0.88	0.11	0.8	-0.38	0.87	-0.43	0.8	0.25	0.45	0.18	0.62
AT1G01640	BTB/POZ domain-containing protein	0	chr1	230994	232508	11.6812	0.113798	11.545	0.0819382	11.3573	0.129838	12.1288	0.184993	12.1755	0.107627	12.199	0.290449	12.2974	0.22554	12.3331	0.136713	12.3327	0.112272	-0.14	0.41	-0.32	0.18	0.05	0.94	0.07	0.92	0.04	0.94	0.04	0.94
AT1G01650	SIGNAL PEPTIDE PEPTIDASE-LIKE 4	0	chr1	232841	237817	10.2593	0.202172	10.8027	0.165295	10.3929	0.111696	10.2652	0.282552	10.1137	0.212029	9.96736	0.277903	9.98958	0.275302	9.95259	0.304301	9.8151	0.0675587	0.54	0.15	0.13	0.63	-0.15	0.87	-0.3	0.69	-0.04	0.96	-0.17	0.68
AT1G01660	RING/U-box superfamily protein	0	chr1	240057	242608	7.56934	0.24844	7.51236	0.0848063	7.52353	0.110169	7.51279	0.220044	7.23257	0.139705	7.41377	0.136034	7.39524	0.348102	7.22547	0.131977	7.30298	0.0709076	-0.06	0.88	-0.05	0.91	-0.28	0.61	-0.1	0.84	-0.17	0.76	-0.09	0.87
AT1G01670	RING/U-box superfamily protein	0	chr1	242843	245988	7.95271	0.122407	7.85848	0.0606323	7.67875	0.0733802	8.03114	0.214376	8.0654	0.235954	7.91542	0.273091	8.49002	0.299932	8.13564	0.209575	7.80838	0.205939	-0.09	0.56	-0.27	0.18	0.03	0.97	-0.12	0.86	-0.35	0.51	-0.68	0.24
AT1G01680	plant U-box 54	0	chr1	246411	248367	7.01515	0.693782	6.89466	0.272073	6.94152	0.30006	7.97829	0.267037	8.02428	0.399236	7.97859	0.328846	8.23594	0.440314	8.00974	0.329784	8.34804	0.286737	-0.12	0.91	-0.07	0.95	0.05	0.98	0	1	-0.23	0.79	0.11	0.9
AT1G01690	putative recombination initiation defects 3	1	chr1	249141	252462	7.74044	0.0656609	7.7417	0.084891	7.70701	0.102605	7.67524	0.0797094	7.64269	0.174095	7.77971	0.084875	7.33197	0.269181	7.44956	0.156423	7.55726	0.167393	0	0.99	-0.03	0.84	-0.03	0.95	0.1	0.62	0.12	0.8	0.23	0.63
AT1G01695	Phosphatidylinositol N-acetyglucosaminlytransferase subunit P-related	1	chr1	252947	254495	5.79758	0.216455	5.77955	0.13115	5.70683	0.0843328	6.17676	0.924133	5.6721	0.127075	5.71036	0.0633161	5.92193	0.298509	5.67566	0.115418	5.60494	0.267881	-0.02	0.96	-0.09	0.76	-0.5	0.84	-0.47	0.79	-0.25	0.6	-0.32	0.58
AT1G01700	RHO guanyl-nucleotide exchange factor 2	0	chr1	259495	261474	6.22709	0.135313	6.19513	0.187627	6.29118	0.132714	6.33405	0.27823	6.14881	0.254209	6.48897	0.141232	5.92586	0.365887	6.11897	0.187252	6.23257	0.150009	-0.03	0.93	0.06	0.79	-0.19	0.85	0.15	0.79	0.19	0.76	0.31	0.59
AT1G01710	Acyl-CoA thioesterase family protein	1	chr1	262828	267771	8.26477	0.170707	8.26169	0.18515	8.40732	0.101186	8.06349	0.143653	8.10698	0.0785311	8.05398	0.141089	7.94453	0.16279	8.19053	0.202623	8.11424	0.247407	0	0.99	0.14	0.54	0.04	0.92	-0.01	0.98	0.25	0.52	0.17	0.7
AT1G01720	NAC (No Apical Meristem) domain transcriptional regulator superfamily protein	1	chr1	268330	269819	10.4059	0.503661	10.5243	0.399017	10.7834	0.450246	10.2718	0.189461	10.2615	0.42785	10.3321	0.332625	10.2044	0.186047	10.3661	0.143432	10.4625	0.36444	0.12	0.9	0.38	0.64	-0.01	0.99	0.06	0.94	0.16	0.65	0.26	0.67
AT1G01725		0	chr1	269792	270775	9.97827	0.0982451	9.65525	0.0809021	9.48628	0.187644	10.1331	0.122062	10.2611	0.198028	10.11	0.284585	10.1786	0.117005	10.462	0.165313	10.026	0.0218324	-0.32	0.11	-0.49	0.14	0.13	0.83	-0.02	0.97	0.28	0.34	-0.15	0.37
AT1G01730		1	chr1	270956	272061	12.6414	0.126086	12.5183	0.0964949	12.4652	0.0680836	12.7361	0.0605559	12.9027	0.0257899	12.7659	0.0819415	12.7006	0.068902	12.8376	0.0945133	12.6487	0.0985386	-0.12	0.51	-0.18	0.31	0.17	0.25	0.03	0.88	0.14	0.42	-0.05	0.77
AT1G01740	Protein kinase protein with tetratricopeptide repeat domain	0	chr1	272111	274569	8.52782	0.115191	8.47557	0.0411101	8.60431	0.057363	8.45864	0.125669	8.52694	0.42783	8.50253	0.0657056	8.48161	0.0462848	8.3383	0.146682	8.46935	0.0501724	-0.05	0.73	0.08	0.61	0.07	0.96	0.04	0.87	-0.14	0.52	-0.01	0.91
AT1G01750	actin depolymerizing factor 11	1	chr1	275366	276310	10.8298	0.378517	10.6934	0.120288	11.0083	0.141464	11.0468	0.195408	10.8635	0.341159	11.1222	0.239984	10.8022	0.166096	10.9527	0.153645	11.0399	0.251478	-0.14	0.79	0.18	0.72	-0.18	0.86	0.08	0.9	0.15	0.66	0.24	0.59
AT1G01760	adenosine deaminases;RNA binding;RNA binding;adenosine deaminases	0	chr1	276266	278448	7.20818	0.192163	7.34223	0.0500476	7.38065	0.127287	6.91541	0.128146	6.92104	0.181195	7.07495	0.0591714	6.78661	0.082213	6.80882	0.257054	6.8349	0.128247	0.13	0.57	0.17	0.52	0.01	0.99	0.16	0.53	0.02	0.96	0.05	0.84
AT1G01770		1	chr1	278615	282891	10.0508	0.117633	9.9492	0.172982	10.1778	0.0430863	10.1353	0.233693	10.3349	0.2603	10.33	0.0940078	10.0948	0.0873237	10.2548	0.119787	10.2011	0.124479	-0.1	0.69	0.13	0.39	0.2	0.83	0.19	0.68	0.16	0.45	0.11	0.63
AT1G01780	GATA type zinc finger transcription factor family protein	1	chr1	282761	284245	7.53227	0.116658	7.5805	0.0299168	7.66539	0.179894	7.68288	0.116489	7.48932	0.100932	7.58419	0.11078	7.76335	0.172813	7.56481	0.210105	7.71546	0.110834	0.05	0.75	0.13	0.6	-0.19	0.54	-0.1	0.74	-0.2	0.63	-0.05	0.88
AT1G01790	K+ efflux antiporter 1	1	chr1	284610	291094	7.25812	0.141197	7.34868	0.109978	7.37882	0.0788462	7.09587	0.188387	6.98328	0.182408	7.0676	0.136973	6.88886	0.216327	6.99653	0.125179	6.96278	0.134902	0.09	0.68	0.12	0.52	-0.11	0.87	-0.03	0.96	0.11	0.78	0.07	0.85
AT1G01800	NAD(P)-binding Rossmann-fold superfamily protein	1	chr1	293342	295040	13.524	0.0496026	13.6147	0.049684	13.5684	0.04708	13.6561	0.122714	13.7785	0.18003	13.7302	0.0908855	13.7326	0.0421568	13.9394	0.0787827	13.7561	0.11009	0.09	0.29	0.04	0.58	0.12	0.83	0.07	0.79	0.21	0.18	0.02	0.9
AT1G01810		1	chr1	295221	295859	5.76375	0.145759	5.89175	0.0988798	5.71496	0.208135	6.17692	0.101782	6.10533	0.0942271	6.17283	0.144845	6.43496	0.289833	6.44372	0.0868183	6.40879	0.128586	0.13	0.54	-0.05	0.89	-0.07	0.84	0	0.99	0.01	0.99	-0.03	0.96
AT1G01820	peroxin 11c	0	chr1	296001	298120	13.6393	0.246806	13.3168	0.105156	13.3259	0.0627492	13.8469	0.0898414	13.8223	0.0544041	13.8329	0.134127	13.7807	0.0601482	13.7534	0.112341	13.7021	0.0675685	-0.32	0.32	-0.31	0.31	-0.02	0.93	-0.01	0.97	-0.03	0.9	-0.08	0.54
AT1G01830	ARM repeat superfamily protein	0	chr1	298535	302315	7.34965	0.0663055	7.64241	0.196828	7.53971	0.101027	7.54602	0.252186	7.4029	0.0823768	7.45953	0.136816	6.89545	0.126059	6.88827	0.126265	6.97484	0.185302	0.29	0.26	0.19	0.23	-0.14	0.84	-0.09	0.88	-0.01	0.98	0.08	0.82
AT1G01840		1	chr1	303537	304358	5.65315	0.0841518	5.6892	0.190035	5.40899	0.192466	5.39644	0.130702	5.45419	0.282958	5.50561	0.244368	5.51293	0.200824	5.36771	0.103115	5.22597	0.165909	0.04	0.9	-0.24	0.33	0.06	0.95	0.11	0.83	-0.15	0.67	-0.29	0.43
AT1G01860	Ribosomal RNA adenine dimethylase family protein	0	chr1	304133	306287	9.07105	0.0886843	8.8949	0.196299	8.90908	0.0393557	9.02693	0.0668397	9.06678	0.034073	9.11047	0.0948905	9.04923	0.168055	9.06517	0.12717	8.99275	0.095707	-0.18	0.49	-0.16	0.21	0.04	0.84	0.08	0.7	0.02	0.97	-0.06	0.85
AT1G01870	pre-tRNA	1	chr1	306384	306456	10.2175	0.170599	10.1186	0.357794	9.93091	0.333064	10.5841	0.159498	10.1467	0.330926	10.1718	0.466688	10.519	0.868127	10.6447	0.839229	10.8597	0.845263	-0.1	0.86	-0.29	0.51	-0.44	0.57	-0.41	0.65	0.13	0.95	0.34	0.86
AT1G01880	5'-3' exonuclease family protein	0	chr1	306480	309109	5.80766	0.116787	5.71486	0.241972	5.89663	0.215684	5.64381	0.271842	5.45172	0.222064	5.40742	0.306728	5.55941	0.382187	5.60397	0.100792	5.50238	0.371811	-0.09	0.79	0.09	0.77	-0.19	0.83	-0.24	0.76	0.04	0.95	-0.06	0.95
AT1G01900	subtilase family protein	1	chr1	310316	313130	6.91143	0.19471	7.3415	0.0885229	7.07572	0.0297019	6.52855	0.157476	6.08664	0.112206	6.31231	0.248288	6.64778	0.329999	6.48008	0.266761	6.81178	0.267886	0.43	0.16	0.16	0.47	-0.44	0.28	-0.22	0.69	-0.17	0.8	0.16	0.8
AT1G01910	P-loop containing nucleoside triphosphate hydrolases superfamily protein	0	chr1	313101	315902	9.60812	0.115765	9.41834	0.127808	9.5031	0.0903804	9.41164	0.261547	9.3842	0.250722	9.43279	0.143429	9.30615	0.103565	9.4254	0.255664	9.40089	0.10543	-0.19	0.36	-0.11	0.54	-0.03	0.98	0.02	0.98	0.12	0.78	0.09	0.66
AT1G01920	SET domain-containing protein	1	chr1	316128	319650	11.7459	0.0507415	11.5579	0.124912	11.6153	0.0983385	11.4975	0.243514	11.6846	0.263416	11.6858	0.132803	11.3117	0.0473491	11.6704	0.127153	11.6495	0.268567	-0.19	0.26	-0.13	0.32	0.19	0.84	0.19	0.72	0.36	0.15	0.34	0.38
AT1G01930	zinc finger protein-related	0	chr1	319836	322860	9.67673	0.112537	9.29656	0.107505	9.58903	0.136995	9.39883	0.0696032	9.62737	0.159022	9.65491	0.0937621	9.37638	0.200003	9.65474	0.16036	9.62024	0.0943876	-0.38	0.12	-0.09	0.68	0.23	0.52	0.26	0.28	0.28	0.45	0.24	0.43
AT1G01940	Cyclophilin-like peptidyl-prolyl cis-trans isomerase family protein	1	chr1	323027	324917	10.3832	0.0885146	10.2581	0.0647912	10.2011	0.048961	10.2992	0.066036	10.3235	0.0964165	10.2705	0.102474	10.3589	0.121933	10.3378	0.0686685	10.3641	0.0903637	-0.13	0.34	-0.18	0.19	0.02	0.94	-0.03	0.9	-0.02	0.93	0.01	0.99
AT1G01950	armadillo repeat kinesin 2	1	chr1	325379	330619	6.43029	0.0986083	6.4091	0.0770295	6.43778	0.114205	6.95148	0.266438	6.93272	0.219946	7.07644	0.248693	6.91498	0.17085	6.79082	0.187681	6.82676	0.221991	-0.02	0.91	0.01	0.98	-0.02	0.99	0.12	0.86	-0.12	0.75	-0.09	0.84
AT1G01960	SEC7-like guanine nucleotide exchange family protein	0	chr1	330588	337582	11.0411	0.254151	11.0818	0.0870788	11.3165	0.212362	11.0055	0.21622	10.9458	0.0642359	11.1952	0.197755	10.8669	0.194966	10.723	0.253452	11.1274	0.267163	0.04	0.92	0.28	0.47	-0.06	0.92	0.19	0.73	-0.14	0.77	0.26	0.59
AT1G01970	Tetratricopeptide repeat (TPR)-like superfamily protein	1	chr1	338291	340077	9.27914	0.0951175	9.39457	0.0965639	9.28297	0.0247893	9.33796	0.158072	9.47454	0.137199	9.36584	0.123469	9.52432	0.0963979	9.50727	0.245549	9.31382	0.112901	0.12	0.47	0	0.98	0.14	0.8	0.03	0.95	-0.02	0.97	-0.21	0.33
AT1G01980	FAD-binding Berberine family protein	0	chr1	340172	341999	5.34947	0.115113	5.37605	0.312105	5.16142	0.175486	5.4211	0.180235	5.31936	0.231033	5.62268	0.207132	5.49742	0.278874	5.40727	0.330748	5.41345	0.251251	0.03	0.96	-0.19	0.44	-0.1	0.89	0.2	0.69	-0.09	0.9	-0.08	0.89
AT1G01990		0	chr1	343166	344341	8.63591	0.0517437	8.7122	0.110474	8.60857	0.131423	8.49326	0.215614	8.33657	0.179722	8.57088	0.131872	8.40471	0.203415	8.41065	0.10971	8.34965	0.0583415	0.08	0.6	-0.03	0.89	-0.16	0.83	0.08	0.87	0.01	0.99	-0.06	0.87
AT1G02000	UDP-D-glucuronate 4-epimerase 2	1	chr1	345812	347592	8.14418	0.17455	8.20463	0.0548993	8.11515	0.0457128	8.62545	0.171161	8.6357	0.185432	8.61043	0.149534	8.42609	0.1798	8.52713	0.0813949	8.32143	0.219416	0.06	0.8	-0.03	0.91	0.01	0.99	-0.02	0.98	0.1	0.74	-0.1	0.81
AT1G02010	secretory 1A	1	chr1	347891	352480	7.31573	0.0809962	7.38125	0.133517	7.29152	0.0914251	7.46796	0.179588	7.4793	0.042854	7.52835	0.123755	7.36829	0.0540134	7.26942	0.1714	7.3883	0.106136	0.07	0.74	-0.02	0.89	0.01	0.98	0.06	0.89	-0.1	0.72	0.02	0.92
AT1G02020	nitroreductase family protein	0	chr1	352637	354969	7.6001	0.0819496	7.61051	0.202001	7.51039	0.164565	7.33707	0.241648	7.42085	0.151061	7.7069	0.0469021	7.63875	0.171008	7.46052	0.200316	7.58383	0.0796056	0.01	0.98	-0.09	0.69	0.08	0.91	0.37	0.43	-0.18	0.65	-0.05	0.85
AT1G02030	C2H2-like zinc finger protein	0	chr1	355321	357258	6.92537	0.173769	6.75092	0.0668129	6.55024	0.100254	6.45661	0.193281	6.46864	0.181911	6.2335	0.224749	6.57799	0.122399	6.4422	0.18772	6.38013	0.129341	-0.17	0.43	-0.38	0.18	0.01	0.99	-0.22	0.69	-0.14	0.69	-0.2	0.43
AT1G02040	C2H2-type zinc finger family protein	0	chr1	358104	359078	5.68983	0.0454882	5.64066	0.139311	5.63414	0.1676	5.51358	0.294073	5.60903	0.0835186	5.53339	0.263442	5.79787	0.191023	5.77869	0.113136	5.77418	0.273086	-0.05	0.8	-0.06	0.8	0.1	0.91	0.02	0.98	-0.02	0.96	-0.02	0.97
AT1G02050	Chalcone and stilbene synthase family protein	0	chr1	359117	360518	9.74328	0.073996	9.74042	0.0664619	9.73318	0.0989063	9.53332	0.157993	9.5523	0.0483276	9.61435	0.162214	9.4422	0.0936986	9.63288	0.131427	9.66924	0.160461	0	0.99	-0.01	0.96	0.02	0.97	0.08	0.85	0.19	0.41	0.23	0.39
AT1G02060	Tetratricopeptide repeat (TPR)-like superfamily protein	0	chr1	360918	363094	6.73059	0.0871872	6.83702	0.152942	6.57825	0.0926314	6.63522	0.192514	6.49362	0.228583	6.66746	0.169955	6.68222	0.214912	6.41024	0.409288	6.55517	0.108119	0.11	0.61	-0.15	0.32	-0.14	0.85	0.03	0.95	-0.27	0.7	-0.13	0.72
AT1G02065	squamosa promoter binding protein-like 8	1	chr1	365209	367340	4.71719	0.152234	4.75881	0.080499	4.96481	0.292038	4.72669	0.218632	4.86678	0.20279	4.85454	0.166305	5.84697	1.49831	4.97307	0.197991	4.89627	0.174548	0.04	0.86	0.25	0.52	0.14	0.86	0.13	0.8	-0.87	0.7	-0.95	0.67
AT_1_-_0_368163-368264		0	chr1	368163	368264	5.20346	0.242115	5.43238	0.0802384	5.42083	0.087831	5.3571	0.217182	5.34842	0.204894	5.35397	0.385979	5.56583	0.69863	5.15273	0.327453	5.24055	0.196753	0.23	0.45	0.22	0.47	-0.01	0.99	0	1	-0.41	0.72	-0.33	0.76
AT1G02070		0	chr1	370257	370967	5.63167	0.270525	5.69123	0.235769	5.29368	0.106951	5.85572	0.231217	5.56341	0.0765457	5.9213	0.256083	6.09454	0.162846	6.04313	0.0948299	5.71124	0.239587	0.06	0.91	-0.34	0.33	-0.29	0.57	0.07	0.93	-0.05	0.86	-0.38	0.36
AT1G02074		1	chr1	372064	372210	5.7419	0.0513778	6.01998	0.167757	5.96015	0.211787	5.86643	0.173398	6.0805	0.563047	5.91967	0.21319	5.89888	0.165192	5.89798	0.137997	5.87832	0.0692034	0.28	0.22	0.22	0.39	0.21	0.89	0.05	0.93	0	1	-0.02	0.95
AT1G02080	transcription regulators	1	chr1	373335	386847	12.5186	0.153264	12.6082	0.111304	12.7724	0.123116	12.551	0.146484	12.4408	0.195372	12.5365	0.196654	12.501	0.142044	12.2707	0.0989649	12.597	0.26353	0.09	0.7	0.25	0.29	-0.11	0.86	-0.01	0.98	-0.23	0.36	0.1	0.83
AT1G02090	Proteasome component (PCI) domain protein	0	chr1	387277	389647	10.8559	0.0697642	10.8748	0.093263	11.0388	0.130543	10.2902	0.242238	10.2212	0.220782	10.369	0.197867	10.5552	0.146809	10.4748	0.213838	10.7338	0.188137	0.02	0.91	0.18	0.31	-0.07	0.94	0.08	0.9	-0.08	0.84	0.18	0.61
AT1G02100	Leucine carboxyl methyltransferase	1	chr1	389812	392816	11.9393	0.118357	11.9587	0.0607664	11.744	0.0378638	12.1607	0.195189	12.1954	0.160221	12.1892	0.161745	12.243	0.127416	12.3575	0.121887	12.2484	0.0553798	0.02	0.92	-0.2	0.23	0.03	0.96	0.03	0.96	0.11	0.67	0.01	0.98
AT1G02110	Protein of unknown function (DUF630 and DUF632)	1	chr1	392831	395528	11.4313	0.139475	11.2475	0.0597668	11.4561	0.109304	11.0488	0.149781	11.105	0.0474959	11.2377	0.141198	10.8806	0.0715692	11.0436	0.134977	11.2422	0.187931	-0.18	0.32	0.02	0.92	0.06	0.89	0.19	0.62	0.16	0.46	0.36	0.25
AT1G02120	GRAM domain family protein	1	chr1	395761	399897	10.7789	0.0758835	10.7447	0.129375	10.7266	0.0559711	10.8292	0.16463	10.7825	0.182298	10.7197	0.103768	10.8053	0.0608272	10.8079	0.15702	10.7272	0.0840638	-0.03	0.87	-0.05	0.64	-0.05	0.95	-0.11	0.76	0	0.99	-0.08	0.6
AT1G02130	RAS 5	0	chr1	400035	401882	10.1804	0.0578943	9.75424	0.105347	9.96853	0.075736	9.90878	0.267599	10.2172	0.191929	10.2231	0.30301	9.94907	0.13969	10.3605	0.100802	10.2343	0.161104	-0.43	0.07	-0.21	0.15	0.31	0.67	0.31	0.67	0.41	0.17	0.29	0.35
AT1G02136		0	chr1	402693	402961	5.49006	0.232534	5.55888	0.14939	5.54625	0.290213	5.7318	0.811621	5.45545	0.150967	5.4216	0.205088	5.30303	0.0672809	5.45043	0.148378	5.48721	0.082339	0.07	0.86	0.06	0.92	-0.28	0.9	-0.31	0.84	0.15	0.54	0.18	0.26
AT1G02140	mago nashi family protein	0	chr1	403190	404456	12.2151	0.128374	12.2044	0.161337	12.2424	0.0467969	12.2738	0.104013	12.2387	0.21597	12.3106	0.119127	12.3537	0.1538	12.2784	0.232226	12.3603	0.132461	-0.01	0.97	0.03	0.89	-0.04	0.96	0.04	0.91	-0.08	0.86	0.01	0.99
AT1G02145	homolog of asparagine-linked glycosylation 12	1	chr1	404600	408619	9.90517	0.0597421	9.96399	0.0295555	9.91643	0.111382	10.0803	0.0794698	10.0942	0.0117623	10.1415	0.06292	9.9898	0.0778469	10.066	0.0451902	10.0475	0.119236	0.06	0.46	0.01	0.95	0.01	0.95	0.06	0.75	0.08	0.56	0.06	0.79
AT1G02150	Tetratricopeptide repeat (TPR)-like superfamily protein	1	chr1	408622	410611	9.27709	0.0610342	9.3937	0.164746	9.32233	0.0262989	9.34589	0.0675451	9.18247	0.0432366	9.31061	0.109631	9.52248	0.097619	9.30175	0.118283	9.31095	0.0491996	0.12	0.58	0.05	0.56	-0.16	0.33	-0.04	0.89	-0.22	0.33	-0.21	0.23
AT1G02160	Cox19 family protein (CHCH motif)	1	chr1	410748	411597	10.7828	0.122028	10.7774	0.105797	10.7919	0.0448298	10.8403	0.0720405	10.9965	0.0409258	11.0545	0.103202	10.9383	0.0961418	10.969	0.102423	11.077	0.136158	-0.01	0.98	0.01	0.96	0.16	0.36	0.21	0.38	0.03	0.89	0.14	0.56
AT1G02170	metacaspase 1	1	chr1	411779	413554	12.5704	0.0986265	12.5452	0.0596604	12.5763	0.0401958	12.3431	0.134812	12.3991	0.102679	12.3714	0.0954074	12.4481	0.0753357	12.4584	0.0662686	12.458	0.0705575	-0.03	0.88	0.01	0.97	0.06	0.9	0.03	0.94	0.01	0.95	0.01	0.96
AT1G02180	ferredoxin-related	0	chr1	413522	414645	8.05691	0.153308	8.07475	0.165734	8.09866	0.094756	8.09078	0.0736925	8.04982	0.156938	8.1878	0.112591	7.96105	0.0810848	8.04766	0.118564	8.14143	0.176685	0.02	0.96	0.04	0.87	-0.04	0.93	0.1	0.7	0.09	0.69	0.18	0.51
AT1G02190	Fatty acid hydroxylase superfamily	1	chr1	415079	418010	5.03616	0.18051	5.07188	0.316339	5.36522	0.261796	4.92402	0.155582	4.99471	0.309698	4.89119	0.141812	5.11547	0.282676	5.13028	0.184165	4.98866	0.175897	0.04	0.95	0.33	0.38	0.07	0.94	-0.03	0.94	0.01	0.98	-0.13	0.8
AT1G02205	Fatty acid hydroxylase superfamily	1	chr1	418748	422438	6.1824	0.372804	6.14507	0.11029	6.18647	0.239985	6.11313	0.158807	6.20181	0.099213	6.57583	0.140138	5.89916	0.398676	6.21043	0.191588	6.46287	0.298283	-0.04	0.95	0	1	0.09	0.85	0.46	0.28	0.31	0.64	0.56	0.42
AT_1_-_0_424875-425117		0	chr1	424875	425117	5.41777	0.168732	5.45554	0.0439929	5.51807	0.24138	5.41108	0.0752853	5.46154	0.191124	5.57561	0.151722	5.34584	0.181484	5.22925	0.0398923	5.46043	0.155417	0.04	0.88	0.1	0.79	0.05	0.93	0.16	0.6	-0.12	0.68	0.11	0.75
AT_1_-_1_426368-426475		0	chr1	426368	426475	5.78021	0.11983	5.70508	0.119999	5.65058	0.125112	5.49843	0.143552	5.3178	0.29872	5.57207	0.245447	5.20103	0.273246	5.58456	0.310342	5.49205	0.173457	-0.08	0.72	-0.13	0.52	-0.18	0.83	0.07	0.89	0.38	0.53	0.29	0.53
AT1G02210	NAC (No Apical Meristem) domain transcriptional regulator superfamily protein	0	chr1	427548	427811	5.23699	0.225649	5.03813	0.0901959	5.23296	0.17784	5.65205	0.497996	5.14984	0.356863	5.13204	0.157503	4.88592	0.328454	5.18193	0.145387	5.21708	0.258226	-0.2	0.49	0	0.99	-0.5	0.73	-0.52	0.58	0.3	0.58	0.33	0.58
AT1G02220	NAC domain containing protein 3	0	chr1	428814	430647	11.5065	0.313463	11.148	0.19623	11.1705	0.106983	12.2997	0.244732	12.2954	0.115978	12.3032	0.156071	12.0941	0.193582	12.4124	0.172865	12.1555	0.0739608	-0.36	0.42	-0.34	0.39	0	1	0	1	0.32	0.4	0.06	0.85
AT_1_+_1_431915-432007		1	chr1	431915	432007	5.63612	0.137136	5.86151	0.128033	6.18222	0.184697	5.60502	0.191799	5.90459	0.360261	5.6481	0.283035	5.75759	0.285899	5.91749	0.35161	5.74019	0.144126	0.23	0.32	0.55	0.14	0.3	0.76	0.04	0.95	0.16	0.82	-0.02	0.98
AT1G02228	transposable element gene	0	chr1	433031	433819	5.76556	0.168979	5.87008	0.212258	6.11593	0.302359	5.95797	0.21507	5.91566	0.200332	5.81243	0.0530005	5.99081	0.297115	5.91601	0.279958	5.93391	0.199434	0.1	0.76	0.35	0.39	-0.04	0.96	-0.15	0.73	-0.07	0.91	-0.06	0.93
AT1G02230	NAC domain containing protein 4	0	chr1	435174	436776	7.07883	0.68625	6.65612	0.427069	6.71564	0.378287	7.15522	0.476237	6.91022	0.375889	7.19962	0.0816428	6.84763	0.761872	6.83185	0.191006	6.61995	0.128729	-0.42	0.67	-0.36	0.7	-0.24	0.88	0.04	0.97	-0.02	0.99	-0.23	0.85
AT1G02250	NAC domain containing protein 5	0	chr1	437951	439559	11.6715	0.445345	11.3327	0.172441	11.4079	0.119356	12.4818	0.12597	12.514	0.225689	12.5304	0.0436352	12.2948	0.0974299	12.4589	0.257676	12.3401	0.15009	-0.34	0.55	-0.26	0.63	0.03	0.97	0.05	0.85	0.16	0.69	0.05	0.87
AT1G02260	Divalent ion symporter	0	chr1	440441	442877	6.99983	0.0475193	6.91058	0.0360865	6.90783	0.0426418	7.07232	0.0737013	7.44642	0.155351	7.44735	0.142476	7.17633	0.223651	7.30786	0.204367	7.27102	0.209663	-0.09	0.24	-0.09	0.26	0.37	0.3	0.38	0.26	0.13	0.78	0.09	0.84
AT1G02270	Calcium-binding endonuclease/exonuclease/phosphatase family	0	chr1	443149	446235	9.29965	0.176928	9.38367	0.0912478	9.22217	0.114483	9.77125	0.027984	9.6158	0.127837	9.68885	0.146852	9.59998	0.163005	9.57554	0.0996928	9.48081	0.112326	0.08	0.74	-0.08	0.77	-0.16	0.57	-0.08	0.77	-0.02	0.94	-0.12	0.68
AT_1_-_1_446906-447013		0	chr1	446906	447013	5.18861	0.219668	5.27526	0.196041	5.27443	0.194397	5.23073	0.125251	5.2088	0.0986072	5.19748	0.130455	5.14404	0.222452	5.26457	0.205559	5.1224	0.397402	0.09	0.83	0.09	0.82	-0.02	0.96	-0.03	0.93	0.12	0.79	-0.02	0.98
AT_1_+_2_447753-447893		1	chr1	447753	447893	6.71205	0.0200225	6.63952	0.045495	6.61564	0.096781	6.61904	0.164932	6.77077	0.166526	6.66664	0.154928	6.61455	0.193996	6.65923	0.0921367	6.75832	0.205472	-0.07	0.25	-0.1	0.4	0.15	0.8	0.05	0.92	0.04	0.9	0.14	0.73
AT1G02280	translocon at the outer envelope membrane of chloroplasts 33	0	chr1	448463	450426	10.3595	0.0904056	10.4404	0.104192	10.3541	0.100965	10.6643	0.0867504	10.5696	0.120999	10.7504	0.159729	11.1167	0.0828759	11.188	0.285854	10.9735	0.0505069	0.08	0.63	-0.01	0.98	-0.09	0.8	0.09	0.8	0.07	0.88	-0.14	0.32
AT1G02290		0	chr1	450527	452737	9.87997	0.163519	10.0163	0.0599269	9.85903	0.0761978	10.0086	0.177338	9.98495	0.118067	10.0292	0.126783	9.90857	0.24358	9.80268	0.123163	9.94844	0.157258	0.14	0.51	-0.02	0.94	-0.02	0.97	0.02	0.97	-0.11	0.8	0.04	0.94
AT1G02300	Cysteine proteinases superfamily protein	1	chr1	453288	455463	9.71723	0.183222	9.53555	0.211466	9.55019	0.153367	10.0291	0.116554	9.95882	0.115661	10.203	0.195598	9.96764	0.159279	9.93195	0.210416	9.98644	0.0582208	-0.18	0.59	-0.17	0.55	-0.07	0.87	0.17	0.68	-0.04	0.94	0.02	0.95
AT1G02305	Cysteine proteinases superfamily protein	1	chr1	455688	458164	12.7041	0.057917	12.5991	0.0701688	12.5713	0.0392322	12.9973	0.177601	13.4126	0.176227	13.2812	0.171904	13.1209	0.146154	13.4134	0.0924323	13.1232	0.170065	-0.1	0.34	-0.13	0.18	0.42	0.42	0.28	0.53	0.29	0.27	0	1
AT1G02310	Glycosyl hydrolase superfamily protein	0	chr1	458133	460696	8.68206	0.414661	8.97388	0.417539	8.71656	0.0862649	9.04175	0.398307	8.88435	0.243242	8.99954	0.104698	8.62264	0.17251	8.81002	0.0889188	8.70171	0.163641	0.29	0.69	0.03	0.96	-0.16	0.9	-0.04	0.96	0.19	0.51	0.08	0.83
AT1G02320		1	chr1	461828	461974	5.38509	0.143174	5.33353	0.132784	5.36612	0.22553	5.39196	0.10373	5.35767	0.18235	5.17787	0.228408	5.29578	0.136932	5.28094	0.195703	5.28932	0.185965	-0.05	0.85	-0.02	0.96	-0.03	0.95	-0.21	0.64	-0.01	0.97	-0.01	0.99
AT1G02330		0	chr1	462075	463612	11.6968	0.0524472	11.5881	0.0267846	11.7057	0.0763216	11.6271	0.0756425	11.7377	0.0671066	11.7536	0.0803278	11.6282	0.0824298	11.7238	0.0776694	11.6873	0.0483681	-0.11	0.18	0.01	0.95	0.11	0.61	0.13	0.53	0.1	0.57	0.06	0.67
AT1G02335	germin-like protein subfamily 2 member 2 precursor	0	chr1	463855	464924	11.7565	0.252854	12.1792	0.198661	11.8006	0.0708716	11.7254	0.257157	11.2532	0.199001	11.2164	0.224533	11.4623	0.19986	11.1611	0.332076	10.9921	0.0854412	0.42	0.28	0.04	0.91	-0.47	0.48	-0.51	0.43	-0.3	0.6	-0.47	0.19
AT1G02340	basic helix-loop-helix (bHLH) DNA-binding superfamily protein	0	chr1	465718	467844	8.68176	0.186305	8.88829	0.0929737	8.48382	0.208928	8.95553	0.223318	9.23838	0.413578	9.1624	0.214677	9.60893	0.226553	9.38535	0.159156	8.85679	0.315957	0.21	0.4	-0.2	0.54	0.28	0.81	0.21	0.72	-0.22	0.59	-0.75	0.23
AT1G02350	protoporphyrinogen oxidase-related	1	chr1	469818	470693	7.66379	0.0690957	7.57207	0.0713077	7.46601	0.08876	7.68825	0.102181	7.63027	0.166721	7.66747	0.136493	7.6833	0.0845113	7.5357	0.180377	7.5589	0.0872554	-0.09	0.44	-0.2	0.2	-0.06	0.91	-0.02	0.96	-0.15	0.62	-0.12	0.47
Group53		0	chr1	471194	471534	9.02406	0.774191	9.78459	0.686322	9.35719	0.343128	8.83736	0.222939	8.58572	0.318321	8.68031	0.199278	8.7931	0.23961	8.93605	0.228206	8.90524	0.170789	0.76	0.53	0.33	0.75	-0.25	0.8	-0.16	0.78	0.14	0.78	0.11	0.8
AT1G02360	Chitinase family protein	0	chr1	471990	473160	13.8154	0.0943674	13.7001	0.102711	13.7382	0.152669	13.2248	0.178369	13.3027	0.114697	13.1335	0.06072	12.9357	0.0754608	13.1569	0.121991	12.8933	0.0773791	-0.12	0.49	-0.08	0.73	0.08	0.89	-0.09	0.79	0.22	0.31	-0.04	0.79
AT1G02370	Tetratricopeptide repeat (TPR)-like superfamily protein	1	chr1	474500	476511	9.41137	0.132839	9.54995	0.0708873	9.4401	0.0610292	9.53879	0.258467	9.32579	0.205392	9.56235	0.0707911	9.56721	0.105721	9.47816	0.11716	9.65193	0.162949	0.14	0.44	0.03	0.89	-0.21	0.8	0.02	0.97	-0.09	0.71	0.08	0.77
AT1G02380		1	chr1	477000	478971	7.07504	0.10698	7.12371	0.149302	6.94288	0.136414	8.25251	0.852855	7.4635	0.218917	7.69726	0.0707025	9.09641	0.276432	8.86884	0.088634	8.73795	0.0960097	0.05	0.85	-0.13	0.51	-0.79	0.69	-0.56	0.73	-0.23	0.6	-0.36	0.39
AT1G02390	glycerol-3-phosphate acyltransferase 2	1	chr1	480852	483292	7.0616	0.132709	7.08098	0.114956	7.64368	0.383073	7.3729	0.287603	7.53784	0.185432	7.29159	0.128959	7.14896	0.238826	6.95623	0.0483715	7.2307	0.20009	0.02	0.94	0.58	0.26	0.16	0.85	-0.08	0.9	-0.19	0.59	0.08	0.87
AT1G02391		0	chr1	483764	483919	4.97607	0.24041	4.96612	0.0505627	5.1449	0.095784	5.20177	0.261265	5.00387	0.110436	5.13036	0.0700937	5.15359	0.156428	5.20919	0.239741	5.08521	0.221214	-0.01	0.98	0.17	0.58	-0.2	0.78	-0.07	0.89	0.06	0.91	-0.07	0.87
AT1G02400	gibberellin 2-oxidase 6	1	chr1	486801	489577	10.1899	0.164219	10.1571	0.340506	10.0731	0.373938	10.2111	0.139614	10.2234	0.215174	10.0405	0.262806	9.83675	0.173302	9.84563	0.197361	10.081	0.0339711	-0.03	0.96	-0.12	0.83	0.01	0.99	-0.17	0.76	0.01	0.99	0.24	0.34
AT1G02405	proline-rich family protein	0	chr1	489979	490505	5.62569	0.202002	5.52568	0.23257	5.50351	0.248688	5.31302	0.06818	5.36236	0.268465	5.51873	0.33326	5.39286	0.173916	5.45787	0.243915	5.33217	0.170606	-0.1	0.81	-0.12	0.76	0.05	0.95	0.21	0.75	0.07	0.9	-0.06	0.88
AT1G02410	cytochrome c oxidase assembly protein CtaG / Cox11 family	1	chr1	490925	492926	9.02922	0.121202	8.76717	0.12556	9.04708	0.13744	9.0138	0.154153	9.41817	0.186179	9.25371	0.0709584	8.96087	0.187891	9.29596	0.0879194	9.34145	0.0608223	-0.26	0.24	0.02	0.95	0.4	0.42	0.24	0.45	0.34	0.29	0.38	0.23
AT1G02420	Pentatricopeptide repeat (PPR) superfamily protein	1	chr1	493683	495158	7.28613	0.096647	7.22614	0.269196	7.18035	0.0335288	6.88316	0.254021	6.79125	0.125895	6.80689	0.13741	6.81973	0.0789987	6.79242	0.179376	6.72528	0.0890687	-0.06	0.88	-0.11	0.38	-0.09	0.9	-0.08	0.89	-0.03	0.94	-0.09	0.58
AT1G02430	ADP-ribosylation factor D1B	0	chr1	495050	496062	9.48815	0.166505	9.21271	0.105417	9.11061	0.142337	9.23601	0.106818	9.06929	0.226206	9.06453	0.122278	8.89231	0.0588092	9.04821	0.115227	8.73581	0.160452	-0.28	0.26	-0.38	0.2	-0.17	0.79	-0.17	0.56	0.16	0.41	-0.16	0.52
AT1G02440	ADP-ribosylation factor D1A	0	chr1	496586	497479	8.0107	0.209407	7.7596	0.0336845	7.69024	0.119485	7.43587	0.377833	7.26211	0.169029	7.34619	0.161763	7.20933	0.193919	7.0772	0.134056	6.96256	0.123024	-0.25	0.33	-0.32	0.28	-0.17	0.87	-0.09	0.91	-0.13	0.71	-0.25	0.45
AT1G02450	NIM1-interacting 1	0	chr1	497976	498516	5.49896	0.152521	5.7146	0.454496	5.39193	0.177527	5.83496	0.19765	5.88625	0.24833	5.75737	0.194899	6.18001	0.0963268	5.89886	0.235409	5.99834	0.106015	0.22	0.72	-0.11	0.71	0.05	0.96	-0.08	0.89	-0.28	0.44	-0.18	0.38
AT_1_+_1_503432-503575		1	chr1	503432	503575	5.51623	0.168969	5.54582	0.156831	5.48943	0.0767595	5.92575	0.469877	5.52717	0.186889	5.52062	0.269967	5.64169	0.087488	5.77008	0.561308	5.61535	0.183847	0.03	0.93	-0.03	0.92	-0.4	0.74	-0.41	0.69	0.13	0.89	-0.03	0.94
AT1G02460	Pectin lyase-like superfamily protein	0	chr1	504673	507204	9.12535	0.470737	8.88684	0.270828	8.88883	0.199531	9.17166	0.358246	8.81685	0.442273	8.89185	0.208312	7.58657	0.192302	7.18544	0.177489	7.51526	0.11521	-0.24	0.72	-0.24	0.7	-0.35	0.81	-0.28	0.72	-0.4	0.31	-0.07	0.84
AT1G02470	Polyketide cyclase/dehydrase and lipid transport superfamily protein	0	chr1	511765	513624	6.05117	0.0356238	5.99706	0.129151	6.11535	0.177497	5.98348	0.201046	6.17221	0.135797	6.01986	0.276121	6.00567	0.302133	6.35276	0.300808	6.70683	1.25819	-0.05	0.75	0.06	0.78	0.19	0.74	0.04	0.96	0.35	0.58	0.7	0.72
AT1G02475	Polyketide cyclase/dehydrase and lipid transport superfamily protein	0	chr1	513843	515404	7.13536	0.248887	7.26404	0.1177	7.08514	0.164726	7.55025	0.112897	7.60171	0.11257	7.58809	0.141364	7.69147	0.147566	7.72934	0.0395903	7.7855	0.206055	0.13	0.7	-0.05	0.91	0.05	0.9	0.04	0.92	0.04	0.88	0.09	0.81
AT1G02490		1	chr1	516618	516734	5.99043	0.0806816	5.88831	0.133018	5.82119	0.0902889	5.9278	0.0669332	5.76478	0.0856262	5.86576	0.0947016	5.94513	0.22048	5.78755	0.163942	5.84181	0.164988	-0.1	0.58	-0.17	0.27	-0.16	0.46	-0.06	0.77	-0.16	0.71	-0.1	0.8
AT1G02500	S-adenosylmethionine synthetase 1	1	chr1	518251	520437	13.6979	0.318143	13.9355	0.132754	13.6792	0.0799234	13.8676	0.169095	13.4855	0.140166	13.5404	0.160441	13.6337	0.0873247	13.5269	0.114154	13.5616	0.0926324	0.24	0.56	-0.02	0.97	-0.38	0.4	-0.33	0.45	-0.11	0.62	-0.07	0.7
AT1G02510	Outward rectifying potassium channel protein	0	chr1	520498	521668	5.42089	0.133735	5.13697	0.134439	5.3906	0.175524	5.09155	0.228189	5.15923	0.24132	5.16228	0.175291	5.38838	0.179858	5.33913	0.138159	5.31418	0.190647	-0.28	0.24	-0.03	0.93	0.07	0.94	0.07	0.9	-0.05	0.89	-0.07	0.86
AT1G02520	P-glycoprotein 11	1	chr1	523651	528745	12.0972	0.173129	12.28	0.136972	12.1484	0.143473	12.5197	0.0989782	12.148	0.148152	12.3467	0.146489	13.1267	0.196265	13.1359	0.257888	13.1479	0.057882	0.18	0.49	0.05	0.87	-0.37	0.32	-0.17	0.59	0.01	0.99	0.02	0.95
AT1G02530	P-glycoprotein 12	1	chr1	529795	534677	11.0314	0.0549767	11.1742	0.199538	10.9321	0.154331	11.5559	0.0880566	11.2136	0.124771	11.2737	0.130161	12.0577	0.158597	12.0734	0.265113	12.1462	0.14348	0.14	0.56	-0.1	0.61	-0.34	0.29	-0.28	0.36	0.02	0.98	0.09	0.78
AT1G02540		0	chr1	534827	535699	5.02612	0.200543	5.25587	0.267728	5.29109	0.136434	5.31676	0.105472	5.34732	0.0755252	5.26451	0.148392	5.38373	0.134428	5.42849	0.2168	5.32985	0.183907	0.23	0.56	0.26	0.35	0.03	0.93	-0.05	0.88	0.04	0.92	-0.05	0.88
AT1G02550	Plant invertase/pectin methylesterase inhibitor superfamily protein	1	chr1	536483	537211	4.62164	0.303566	5.05654	0.74312	4.97035	0.234055	4.62943	0.157773	4.60347	0.260035	4.67601	0.190415	4.85601	0.134547	4.72036	0.191316	4.69319	0.117599	0.43	0.65	0.35	0.43	-0.03	0.98	0.05	0.93	-0.14	0.7	-0.16	0.52
AT1G02560	nuclear encoded CLP protease 5	1	chr1	537860	540109	7.49653	0.0875266	7.65009	0.0887427	7.67949	0.0345302	7.65262	0.2123	7.69435	0.0819916	7.79199	0.0270012	7.86438	0.132304	7.72372	0.224304	8.01863	0.241768	0.15	0.31	0.18	0.18	0.04	0.95	0.14	0.73	-0.14	0.72	0.15	0.71
AT1G02570		1	chr1	541335	542240	7.59238	0.281495	7.73375	0.211392	7.87771	0.159356	8.46028	0.420324	7.37464	0.70289	8.1434	0.0659788	8.49852	0.222657	8.02089	0.259659	8.52537	0.186937	0.14	0.75	0.29	0.45	-1.09	0.52	-0.32	0.69	-0.48	0.34	0.03	0.96
AT1G02575		1	chr1	543110	544007	5.3586	0.0699622	5.22978	0.264674	5.30286	0.161512	5.35823	0.14443	5.39692	0.271589	5.39039	0.196568	5.43276	0.101747	5.41984	0.0791447	5.43864	0.165972	-0.13	0.7	-0.06	0.81	0.04	0.97	0.03	0.95	-0.01	0.96	0.01	0.99
AT1G02580	SET domain-containing protein	1	chr1	544783	549202	6.13598	0.308834	6.19488	0.224347	6.03186	0.323436	6.00738	0.167402	6.21352	0.177861	6.20177	0.247468	5.69558	0.169601	6.01468	0.174733	6.08102	0.206477	0.06	0.92	-0.1	0.87	0.21	0.71	0.19	0.73	0.32	0.37	0.39	0.33
AT1G02590	Aldehyde oxidase/xanthine dehydrogenase, molybdopterin binding protein	0	chr1	552138	552761	5.23244	0.112484	5.30492	0.0669774	5.12458	0.106867	5.2372	0.166496	5.19443	0.276167	5.24027	0.133637	5.36984	0.114039	5.02199	0.160187	5.1312	0.287346	0.07	0.65	-0.11	0.55	-0.04	0.97	0	1	-0.35	0.26	-0.24	0.59
AT1G02610	RING/FYVE/PHD zinc finger superfamily protein	0	chr1	553050	555994	10.6764	0.3264	10.6548	0.167714	10.5073	0.0803563	10.163	0.413901	10.2496	0.334197	10.2876	0.28848	9.77156	0.15801	9.83844	0.22091	9.4448	0.315478	-0.02	0.97	-0.17	0.68	0.09	0.96	0.12	0.9	0.07	0.88	-0.33	0.51
AT1G02620	Ras-related small GTP-binding family protein	1	chr1	557092	557986	6.31363	0.304294	6.52962	0.317445	6.89931	0.266223	6.30605	0.215034	6.31008	0.328004	5.91498	0.101418	5.90959	0.402245	6.03675	0.464486	5.91653	0.2812	0.22	0.69	0.59	0.25	0	1	-0.39	0.39	0.13	0.9	0.01	0.99
AT1G02630	Nucleoside transporter family protein	0	chr1	560610	562424	6.31945	0.0839246	6.1734	0.116116	6.35175	0.119082	6.05515	0.154186	5.89667	0.0716957	5.97803	0.145212	5.84015	0.0942209	6.11454	0.239311	5.89456	0.208839	-0.15	0.39	0.03	0.87	-0.16	0.67	-0.08	0.85	0.27	0.46	0.05	0.88
AT1G02640	beta-xylosidase 2	1	chr1	564205	567769	14.2641	0.483923	14.227	0.0345621	14.685	0.0829587	13.553	0.113831	13.3302	0.151968	13.6752	0.147525	13.0713	0.38421	12.6829	0.108785	12.7811	0.213467	-0.04	0.96	0.42	0.46	-0.22	0.58	0.12	0.73	-0.39	0.5	-0.29	0.65
AT1G02650	Tetratricopeptide repeat (TPR)-like superfamily protein	1	chr1	568704	570418	6.00057	0.174633	6.20203	0.320705	6.11166	0.143767	7.53332	1.73015	6.25403	0.0727747	7.1974	1.59884	7.43313	0.229298	7.87398	0.611553	7.53783	0.183929	0.2	0.65	0.11	0.69	-1.28	0.76	-0.34	0.95	0.44	0.65	0.1	0.82
AT1G02660	alpha/beta-Hydrolases superfamily protein	0	chr1	571955	574981	8.92391	0.365833	9.35359	0.367517	9.01114	0.346	8.84378	0.345202	8.76778	0.310314	8.79251	0.263743	8.88949	0.197737	8.79621	0.105553	8.79672	0.304998	0.43	0.48	0.09	0.9	-0.08	0.95	-0.05	0.96	-0.09	0.78	-0.09	0.87
AT1G02670	P-loop containing nucleoside triphosphate hydrolases superfamily protein	1	chr1	576046	580299	6.96924	0.171166	7.2518	0.113207	6.92198	0.129024	6.90707	0.350774	7.49454	0.705939	6.98879	0.346784	8.63253	0.232171	8.59654	0.0848659	8.70427	0.136725	0.28	0.27	-0.05	0.87	0.59	0.76	0.08	0.94	-0.04	0.93	0.07	0.87
AT1G02680	TBP-associated factor 13	1	chr1	580625	582310	8.51463	0.177672	8.42925	0.0894051	8.41243	0.0867113	8.49466	0.153719	8.71223	0.0650057	8.61648	0.20534	8.5046	0.256351	8.68262	0.10172	8.46182	0.0391158	-0.09	0.73	-0.1	0.67	0.22	0.53	0.12	0.8	0.18	0.67	-0.04	0.92
AT1G02681		1	chr1	582413	582922	5.10877	0.202164	5.25936	0.190169	5.08907	0.108522	5.44788	0.187228	5.34991	0.189469	5.42458	0.158711	5.63242	0.177737	5.44655	0.203418	5.25824	0.112293	0.15	0.65	-0.02	0.96	-0.1	0.89	-0.02	0.97	-0.19	0.65	-0.37	0.26
AT1G02690	importin alpha isoform 6	1	chr1	584260	587219	11.0698	0.10837	11.1211	0.121385	11.1	0.0957383	11.0821	0.209995	11.1063	0.144512	11.1149	0.0624459	10.9466	0.0352353	10.9562	0.0718499	10.9833	0.089063	0.05	0.81	0.03	0.88	0.02	0.98	0.03	0.94	0.01	0.95	0.04	0.8
AT1G02700		1	chr1	588329	589480	4.98746	0.326282	4.92721	0.385906	4.91624	0.180162	5.18921	0.172294	5.04525	0.223393	5.22718	0.396188	5.81972	0.523095	5.79784	0.183183	5.54509	0.102714	-0.06	0.94	-0.07	0.89	-0.14	0.84	0.04	0.97	-0.02	0.98	-0.27	0.73
AT1G02710	glycine-rich protein	0	chr1	589706	589996	5.03924	0.109128	5.05905	0.140271	4.95889	0.0817778	5.07676	0.236857	5.14163	0.405182	5.31562	0.28974	5.09428	0.153707	5.17052	0.152145	5.13628	0.202932	0.02	0.94	-0.08	0.62	0.06	0.96	0.24	0.73	0.08	0.82	0.04	0.92
AT1G02720	galacturonosyltransferase 5	1	chr1	591826	594236	8.6034	0.15789	8.55596	0.0532187	8.69013	0.177755	8.56437	0.219075	8.56909	0.143705	8.76073	0.039704	9.37284	0.117818	9.38264	0.0750303	9.65887	0.171465	-0.05	0.83	0.09	0.77	0	1	0.2	0.63	0.01	0.97	0.29	0.34
AT1G02730	cellulose synthase-like D5	0	chr1	594573	598657	8.94428	0.481654	9.25601	0.176795	9.075	0.198882	9.13528	0.296024	8.73039	0.264801	9.07214	0.0704029	8.20701	0.137651	8.14392	0.124046	8.42383	0.31424	0.31	0.61	0.13	0.85	-0.4	0.63	-0.06	0.92	-0.06	0.83	0.22	0.67
AT1G02740	MRG family protein	0	chr1	599416	602038	8.27821	0.190409	8.42755	0.0470762	8.21838	0.0784318	8.56224	0.0282092	8.44766	0.197855	8.57282	0.12123	8.8173	0.095566	8.88137	0.0365419	8.77289	0.121432	0.15	0.52	-0.06	0.83	-0.11	0.82	0.01	0.97	0.06	0.68	-0.04	0.85
AT1G02750	Drought-responsive family protein	1	chr1	602497	604292	11.3954	0.366003	11.1728	0.0835715	11.0834	0.0912408	11.6868	0.146506	11.6707	0.139912	11.4569	0.0591927	11.7383	0.0822986	11.8432	0.0769444	11.5437	0.165119	-0.22	0.62	-0.31	0.47	-0.02	0.98	-0.23	0.44	0.1	0.52	-0.19	0.45
AT1G02770	Protein of unknown function (DUF626)	0	chr1	604873	606693	6.52614	0.0976722	6.77849	0.185463	6.80297	0.11721	6.46104	0.252067	6.67735	0.145918	6.76712	0.158561	6.65154	0.171759	6.75579	0.158437	6.89705	0.0785354	0.25	0.32	0.28	0.19	0.22	0.76	0.31	0.57	0.1	0.77	0.25	0.37
AT1G02780	Ribosomal protein L19e family protein	0	chr1	607808	609465	15.36	0.0827641	15.2925	0.0469005	15.4606	0.0922316	15.1376	0.203929	15.241	0.16544	15.3175	0.0872297	15.0621	0.18609	15.1915	0.143468	15.3043	0.0592884	-0.07	0.55	0.1	0.48	0.1	0.88	0.18	0.66	0.13	0.72	0.24	0.38
AT1G02790	polygalacturonase 4	0	chr1	610391	612324	5.46011	0.382559	5.5442	0.125626	5.3841	0.0235732	5.10127	0.203822	5.12636	0.235228	5.29919	0.234018	5.11996	0.227339	5.40079	0.262872	5.58026	1.19782	0.08	0.88	-0.08	0.89	0.03	0.98	0.2	0.73	0.28	0.58	0.46	0.8
AT1G02800	cellulase 2	0	chr1	613216	616191	5.11092	0.187201	5.24562	0.127461	5.17893	0.207122	5.14981	0.178685	5.03654	0.182031	5.05036	0.246501	4.85424	0.132922	5.07624	0.321081	5.0931	0.267812	0.13	0.62	0.07	0.86	-0.11	0.86	-0.1	0.86	0.22	0.67	0.24	0.58
AT_1_+_1_617117-617212		1	chr1	617117	617212	5.28906	0.276621	5.03211	0.209516	5.00303	0.202999	5.90006	1.37386	4.8979	0.36023	4.98833	0.126509	4.83499	0.150435	4.99532	0.303039	4.86022	0.275	-0.26	0.53	-0.29	0.47	-1	0.77	-0.91	0.72	0.16	0.76	0.03	0.97
AT1G02810	Plant invertase/pectin methylesterase inhibitor superfamily	1	chr1	618265	620480	7.93111	0.16311	7.87092	0.0595158	7.42345	0.0811249	8.17421	0.268363	8.13824	0.165991	8.01096	0.0871504	8.21092	0.204496	8.05871	0.0257647	7.92125	0.130054	-0.06	0.79	-0.51	0.12	-0.04	0.97	-0.16	0.76	-0.15	0.62	-0.29	0.4
AT1G02813	Protein of unknown function, DUF538	1	chr1	620678	621289	5.12092	0.149395	5.09218	0.154367	5.05817	0.145481	5.1635	0.15737	5.29685	0.183319	5.19316	0.307756	5.13555	0.195747	5.27424	0.240922	5.04625	0.239257	-0.03	0.93	-0.06	0.82	0.13	0.83	0.03	0.97	0.14	0.77	-0.09	0.85
AT1G02816	Protein of unknown function, DUF538	1	chr1	621461	622469	7.52911	0.113043	7.65042	0.266011	7.42637	0.189481	7.92059	0.160239	8.07587	0.251503	8.02944	0.216334	7.82006	0.334415	8.16709	0.316623	7.74717	0.146542	0.12	0.74	-0.1	0.7	0.16	0.84	0.11	0.83	0.35	0.61	-0.07	0.9
AT1G02820	Late embryogenesis abundant 3 (LEA3) family protein	0	chr1	623765	624475	5.60344	0.0915328	5.52061	0.146668	5.41061	0.142058	5.48617	0.254038	5.24299	0.24115	5.28538	0.430833	6.00326	0.333693	6.25296	0.370319	6.28529	0.205032	-0.08	0.7	-0.19	0.34	-0.24	0.78	-0.2	0.83	0.25	0.74	0.28	0.62
AT1G02830	Ribosomal L22e protein family	0	chr1	625145	625608	4.83323	0.262875	5.12414	0.198332	5.07555	0.110934	5.04389	0.0861566	5.12768	0.109408	5.26134	0.157868	5.23647	0.168864	5.48273	0.227306	5.37355	0.24831	0.29	0.46	0.24	0.46	0.08	0.81	0.22	0.51	0.25	0.55	0.14	0.76
AT_1_+_2_625992-626108		1	chr1	625992	626108	5.42036	0.143436	5.377	0.202247	5.33948	0.156075	5.39183	0.109691	5.33659	0.0258446	5.40591	0.182779	5.34229	0.218934	5.34465	0.357452	5.37356	0.248339	-0.04	0.9	-0.08	0.76	-0.06	0.85	0.01	0.98	0	1	0.03	0.96
AT1G02840	RNA-binding (RRM/RBD/RNP motifs) family protein	1	chr1	626741	629819	12.8245	0.0632874	12.7177	0.0658401	12.7469	0.070381	12.8394	0.183051	13.0389	0.12669	13.0275	0.126334	13.0583	0.169248	13.2154	0.0177269	13.1244	0.198302	-0.11	0.33	-0.08	0.48	0.2	0.69	0.19	0.65	0.16	0.53	0.07	0.87
AT1G02850	beta glucosidase 11	1	chr1	630505	633259	9.92679	0.443169	9.78454	0.386207	9.437	0.251455	10.9661	0.483631	11.1133	0.237752	11.0186	0.245073	10.8654	0.326319	11.1816	0.165755	11.0494	0.0929563	-0.14	0.86	-0.49	0.41	0.15	0.92	0.05	0.97	0.32	0.55	0.18	0.72
AT1G02860	SPX (SYG1/Pho81/XPR1) domain-containing protein	1	chr1	635144	637262	12.1184	0.25542	11.9764	0.109809	12.0258	0.0845749	12.3245	0.181638	12.4244	0.072321	12.5638	0.154487	12.3275	0.158858	12.1219	0.140186	12.204	0.177963	-0.14	0.68	-0.09	0.79	0.1	0.84	0.24	0.58	-0.21	0.5	-0.12	0.73
AT1G02870		0	chr1	637214	638677	12.2235	0.10942	12.0712	0.134887	12.2014	0.0829871	11.9282	0.114155	12.1721	0.0710034	12.0616	0.0813937	11.823	0.312568	12.2	0.181877	12.0998	0.0859115	-0.15	0.46	-0.02	0.91	0.24	0.38	0.13	0.61	0.38	0.47	0.28	0.55
CUFF.919		1	chr1	641564	642164	6.93259	0.147588	6.92795	0.212165	6.86535	0.190258	7.12598	0.27725	7.06123	0.0798491	7.11847	0.14218	7.03396	0.189129	6.94798	0.175936	6.83845	0.179875	0	0.99	-0.07	0.83	-0.06	0.94	-0.01	0.99	-0.09	0.83	-0.2	0.61
AT1G02880	thiamin pyrophosphokinase1	0	chr1	642752	644903	6.12143	0.225395	6.12404	0.101665	6.04994	0.0806613	5.89074	0.282295	6.19941	0.240303	6.16787	0.164153	5.99931	0.0857024	6.19625	0.127921	6.24226	0.156259	0	0.99	-0.07	0.82	0.31	0.72	0.28	0.64	0.2	0.38	0.24	0.35
AT1G02890	AAA-type ATPase family protein	0	chr1	645092	651907	9.29084	0.108725	9.40143	0.0788843	9.35974	0.0952504	9.22924	0.398289	9.02821	0.278938	9.13915	0.210324	9.1282	0.151043	8.85696	0.137371	8.97136	0.135141	0.11	0.49	0.07	0.69	-0.2	0.87	-0.09	0.92	-0.27	0.36	-0.16	0.59
AT_1_+_0_652495-652653		1	chr1	652495	652653	5.06867	0.129158	5.0334	0.135718	5.08812	0.0873692	5.04109	0.209069	5.22362	0.110224	4.92484	0.268298	5.18321	0.328195	5.23599	0.15663	5.19817	0.260745	-0.04	0.9	0.02	0.93	0.18	0.75	-0.12	0.86	0.05	0.93	0.01	0.98
AT1G02900	rapid alkalinization factor 1	0	chr1	653765	654343	14.0816	0.178314	13.8318	0.0793895	13.8148	0.0878605	13.8081	0.142883	13.3141	0.16609	13.4676	0.141771	13.9928	0.199303	13.731	0.124275	13.7456	0.105306	-0.25	0.3	-0.27	0.28	-0.49	0.29	-0.34	0.38	-0.26	0.44	-0.25	0.44
AT1G02910	tetratricopeptide repeat (TPR)-containing protein	0	chr1	655577	658148	9.23619	0.125266	9.37595	0.103076	9.33022	0.0890447	9.46583	0.119604	9.36235	0.0579284	9.51854	0.0364874	9.60572	0.12168	9.49382	0.084004	9.43426	0.071355	0.14	0.47	0.09	0.6	-0.1	0.74	0.05	0.82	-0.11	0.61	-0.17	0.39
AT1G02920	glutathione S-transferase 7	0	chr1	658657	659771	13.305	0.300401	13.1246	0.493644	13.2264	0.21021	13.3104	0.217996	12.5042	0.156369	12.5574	0.40608	13.0081	0.156008	12.7547	0.173465	12.4923	0.0848828	-0.18	0.81	-0.08	0.88	-0.81	0.2	-0.75	0.4	-0.25	0.45	-0.52	0.11
AT1G02930	glutathione S-transferase 6	0	chr1	661177	662456	13.4843	0.105848	13.3293	0.376263	13.3792	0.230956	13.4405	0.181712	12.6462	0.316107	12.4474	0.126401	12.5568	0.19561	12.2193	0.233321	12.1931	0.371819	-0.16	0.75	-0.11	0.74	-0.79	0.3	-0.99	0.08	-0.34	0.44	-0.36	0.54
AT1G02940	glutathione S-transferase (class phi) 5	0	chr1	663079	664128	5.52373	0.168813	5.81824	0.299637	5.74012	0.198696	5.65771	0.339569	5.77815	0.194234	5.87629	0.282706	5.70611	0.316484	5.65626	0.186506	5.56216	0.199152	0.29	0.47	0.22	0.47	0.12	0.91	0.22	0.79	-0.05	0.94	-0.14	0.8
AT1G02950	glutathione S-transferase F4	0	chr1	665152	666452	11.0631	0.0914994	11.3289	0.0129754	10.8726	0.0567771	11.432	0.0457866	11.189	0.106234	10.9689	0.249768	11.3408	0.134072	11.1304	0.0627612	10.9589	0.127872	0.27	0.1	-0.19	0.2	-0.24	0.32	-0.46	0.35	-0.21	0.34	-0.38	0.21
AT1G02952	other RNA	1	chr1	665354	666367	5.6705	0.24857	5.69978	0.0892386	5.80915	0.116782	5.76583	0.155005	6.06997	0.188828	6.00738	0.172173	5.91223	0.15929	5.77402	0.269605	5.81667	0.171042	0.03	0.94	0.14	0.68	0.3	0.55	0.24	0.57	-0.14	0.77	-0.1	0.79
AT1G02960		0	chr1	666872	669837	7.8515	0.116464	7.7755	0.13175	7.852	0.0784328	8.1228	0.160692	8.23473	0.169374	8.28432	0.104041	8.1685	0.0488398	8.22052	0.202262	8.13447	0.132291	-0.08	0.73	0	1	0.11	0.85	0.16	0.65	0.05	0.88	-0.03	0.88
AT_1_-_2_670663-670854		0	chr1	670663	670854	5.00726	0.186447	5.20086	0.212762	5.04003	0.15845	5.56263	0.355397	5.33418	0.15603	5.12643	0.187449	5.41482	0.140183	5.02437	0.201478	5.29402	0.203293	0.19	0.56	0.03	0.93	-0.23	0.82	-0.44	0.55	-0.39	0.29	-0.12	0.74
AT1G02965		0	chr1	671661	672814	5.93056	0.134113	5.87101	0.2294	5.95282	0.0686745	5.73343	0.132541	5.87275	0.272843	5.86257	0.0979488	5.81126	0.223443	5.96561	0.218333	6.05506	0.126368	-0.06	0.87	0.02	0.92	0.14	0.86	0.13	0.67	0.15	0.75	0.24	0.5
AT1G02970	WEE1 kinase homolog	1	chr1	673306	676378	6.43752	0.154777	6.6766	0.0485781	6.39518	0.156036	6.87519	0.200982	6.91577	0.214015	7.0661	0.141722	8.28637	0.517705	7.91204	0.202019	7.93941	0.0612946	0.24	0.25	-0.04	0.89	0.04	0.96	0.19	0.67	-0.37	0.65	-0.35	0.65
AT1G02980	cullin 2	1	chr1	677869	681310	6.41145	0.0829887	6.49854	0.233879	6.24441	0.192	6.83925	0.146631	6.52595	0.174714	6.56899	0.250757	7.29719	0.127009	7.15145	0.151368	7.23751	0.160876	0.09	0.79	-0.17	0.49	-0.31	0.5	-0.27	0.61	-0.15	0.62	-0.06	0.85
AT1G02990		0	chr1	681396	687315	6.06808	0.0924045	6.38126	0.155387	6.18288	0.103118	6.05752	0.237461	5.80379	0.129849	6.0715	0.324545	6.22335	0.362294	5.9171	0.237095	5.90114	0.347927	0.31	0.2	0.11	0.47	-0.25	0.67	0.01	0.99	-0.31	0.64	-0.32	0.66
AT1G03000	peroxin 6	0	chr1	687890	692560	10.1026	0.0920752	9.99122	0.0516324	10.0101	0.0516178	10.0426	0.17137	10.2106	0.26898	10.1987	0.122413	10.1881	0.0918737	10.1946	0.164339	10.168	0.125275	-0.11	0.38	-0.09	0.45	0.17	0.84	0.16	0.69	0.01	0.99	-0.02	0.94
AT1G03010	Phototropic-responsive NPH3 family protein	1	chr1	693480	696382	9.22055	0.113049	9.58478	0.0849619	9.33654	0.0239821	8.81118	0.119273	8.76756	0.160346	8.85031	0.0996801	8.44173	0.08895	8.28291	0.126095	8.19401	0.252257	0.36	0.11	0.12	0.39	-0.04	0.94	0.04	0.9	-0.16	0.47	-0.25	0.51
AT1G03020	Thioredoxin superfamily protein	0	chr1	698207	698515	5.26905	0.113803	5.29569	0.12985	5.10457	0.0733128	5.2882	0.140633	5.27661	0.0818212	5.20866	0.180946	5.84105	0.510451	5.42193	0.291288	5.92032	0.228778	0.03	0.92	-0.16	0.31	-0.01	0.98	-0.08	0.85	-0.42	0.64	0.08	0.94
AT1G03022		1	chr1	699121	699246	5.94283	0.171467	5.96794	0.233693	5.87522	0.101497	5.92129	0.204464	5.92515	0.203977	5.94735	0.27989	5.71008	0.111896	5.95354	0.250845	5.96915	0.170949	0.03	0.96	-0.07	0.79	0	1	0.03	0.97	0.24	0.54	0.26	0.38
AT1G03030	P-loop containing nucleoside triphosphate hydrolases superfamily protein	1	chr1	701478	703864	6.2511	0.0802057	6.21256	0.157177	6.23418	0.106118	6.30829	0.06215	6.90709	0.937345	6.27853	0.208999	6.23773	0.272479	6.43306	0.0934002	6.24058	0.1078	-0.04	0.88	-0.02	0.93	0.6	0.8	-0.03	0.95	0.2	0.65	0	1
AT1G03040	basic helix-loop-helix (bHLH) DNA-binding superfamily protein	0	chr1	703906	706631	8.59386	0.169963	8.66922	0.126312	8.63893	0.0976427	8.67615	0.290352	8.62647	0.268549	8.75027	0.125946	8.48491	0.147429	8.40165	0.163968	8.637	0.123009	0.08	0.78	0.05	0.87	-0.05	0.97	0.07	0.9	-0.08	0.8	0.15	0.58
AT_1_-_2_707014-707175		0	chr1	707014	707175	5.08535	0.108783	5.05955	0.159508	5.14097	0.114479	5.2481	0.137336	5.36483	0.239357	5.42333	0.215293	5.4908	0.317062	5.14761	0.206356	5.10974	0.228322	-0.03	0.93	0.06	0.78	0.12	0.87	0.18	0.72	-0.34	0.53	-0.38	0.49
AT1G03050	ENTH/ANTH/VHS superfamily protein	1	chr1	707726	710041	5.19775	0.085343	5.11127	0.350965	5.09641	0.20428	5.3172	0.271347	4.95489	0.152584	5.21321	0.0639721	5.65077	0.672152	5.04272	0.111491	5.28332	0.156853	-0.09	0.86	-0.1	0.71	-0.36	0.58	-0.1	0.84	-0.61	0.54	-0.37	0.72
AT1G03055		0	chr1	710018	711803	5.13092	0.143036	5.30195	0.309815	5.16013	0.22268	5.31122	0.312072	5.28808	0.150991	5.2468	0.146698	5.38711	0.0927888	5.16254	0.185868	5.27799	0.171341	0.17	0.68	0.03	0.94	-0.02	0.98	-0.06	0.93	-0.22	0.45	-0.11	0.71
AT1G03060	Beige/BEACH domain ;WD domain, G-beta repeat protein	0	chr1	712473	726891	9.63404	0.286226	9.86954	0.103396	9.70881	0.102096	9.93184	0.311474	9.65176	0.282169	10.031	0.276393	9.93932	0.188121	9.58502	0.323973	9.70945	0.353538	0.24	0.51	0.07	0.86	-0.28	0.79	0.1	0.9	-0.35	0.52	-0.23	0.7
AT1G03070	Bax inhibitor-1 family protein	1	chr1	729901	731557	8.34249	0.0508906	8.38488	0.0918312	8.4178	0.160305	8.44661	0.070094	8.47519	0.161222	8.51753	0.137714	8.85218	0.19146	8.92897	0.211729	8.92976	0.114715	0.04	0.75	0.08	0.71	0.03	0.96	0.07	0.8	0.08	0.86	0.08	0.82
AT1G03080	kinase interacting (KIP1-like) family protein	0	chr1	731611	738056	11.5419	0.0944313	11.7054	0.059113	11.5715	0.131322	11.6783	0.0710248	11.527	0.184301	11.5489	0.100559	11.5354	0.184602	11.2074	0.109918	11.3235	0.147513	0.16	0.25	0.03	0.9	-0.15	0.75	-0.13	0.56	-0.33	0.31	-0.21	0.53
AT1G03090	methylcrotonyl-CoA carboxylase alpha chain, mitochondrial / 3-methylcrotonyl-CoA carboxylase 1 (MCCA)	1	chr1	739679	744184	7.4378	0.281899	7.35023	0.187013	7.03224	0.18342	6.90851	0.310349	7.51887	0.450546	7.44402	0.249284	6.96067	0.172135	7.21034	0.133554	6.82072	0.263068	-0.09	0.85	-0.41	0.32	0.61	0.59	0.54	0.47	0.25	0.43	-0.14	0.77
AT1G03100	Pentatricopeptide repeat (PPR) superfamily protein	0	chr1	743885	746479	7.12081	0.0852727	7.28171	0.0760708	7.17967	0.141591	7.08067	0.163125	6.98729	0.0550597	7.1687	0.211093	7.87337	0.259538	7.62759	0.211922	7.62944	0.0185619	0.16	0.26	0.06	0.78	-0.09	0.83	0.09	0.86	-0.25	0.62	-0.24	0.51
AT1G03103	Bifunctional inhibitor/lipid-transfer protein/seed storage 2S albumin superfamily protein	1	chr1	747197	748057	5.13837	0.0328138	5.08115	0.180187	5.35238	0.125979	5.11201	0.176422	5.15392	0.160178	4.91049	0.188691	5.09666	0.117222	4.8367	0.145947	5.31614	0.0880063	-0.06	0.81	0.21	0.22	0.04	0.95	-0.2	0.67	-0.26	0.35	0.22	0.31
AT1G03106		0	chr1	748102	749034	6.93774	0.202073	7.14705	0.120607	7.24239	0.093477	7.06666	0.130288	7.25409	0.122727	7.23109	0.167333	7.01006	0.24598	7.25857	0.11069	7.11113	0.0605825	0.21	0.45	0.3	0.27	0.19	0.62	0.16	0.67	0.25	0.53	0.1	0.79
AT1G03110	Transducin/WD40 repeat-like superfamily protein	1	chr1	749246	751963	9.47451	0.109382	9.50906	0.0899322	9.58986	0.143398	9.08423	0.198426	8.89517	0.137806	9.04619	0.0915551	9.18611	0.164273	9.09259	0.122887	9.26421	0.0920003	0.03	0.86	0.12	0.58	-0.19	0.74	-0.04	0.93	-0.09	0.76	0.08	0.78
AT1G03120	responsive to abscisic acid 28	1	chr1	752271	753140	5.8181	0.0449954	5.81567	0.184539	5.67007	0.107454	5.68015	0.196725	5.76192	0.233823	5.76501	0.103864	5.67099	0.209195	5.81487	0.139455	5.7326	0.11898	0	0.99	-0.15	0.3	0.08	0.92	0.08	0.84	0.14	0.71	0.06	0.87
AT1G03130	photosystem I subunit D-2	0	chr1	753307	754198	5.77333	0.0858488	5.6728	0.125516	5.61879	0.0779056	5.65532	0.159795	5.65748	0.291011	5.83943	0.254584	5.56375	0.126306	5.63667	0.256154	5.60869	0.143466	-0.1	0.58	-0.15	0.28	0	1	0.18	0.75	0.07	0.87	0.04	0.88
AT1G03140	splicing factor Prp18 family protein	0	chr1	754371	756303	12.1068	0.0514038	12.1056	0.0781655	12.042	0.0290112	12.0666	0.107511	12.1723	0.0556317	12.1397	0.0400809	12.1346	0.0343734	12.2403	0.123815	12.0655	0.0625246	0	0.99	-0.06	0.35	0.11	0.7	0.07	0.73	0.11	0.58	-0.07	0.49
AT1G03150	Acyl-CoA N-acyltransferases (NAT) superfamily protein	1	chr1	756414	758612	11.4269	0.0619721	11.2581	0.0352114	11.1729	0.0262966	11.5503	0.155815	11.7138	0.14847	11.5647	0.11358	11.5076	0.0831876	11.6234	0.0983755	11.4105	0.0877376	-0.17	0.13	-0.25	0.08	0.16	0.75	0.01	0.97	0.12	0.54	-0.1	0.58
AT1G03160	FZO-like	1	chr1	761282	766158	9.40839	0.0803776	9.41979	0.0870527	9.27188	0.0433974	9.38191	0.0360319	9.40349	0.0202532	9.41619	0.0627516	9.26455	0.192024	9.2101	0.0947444	9.15292	0.0473777	0.01	0.95	-0.14	0.24	0.02	0.84	0.03	0.8	-0.05	0.87	-0.11	0.7
AT1G03170	Protein of unknown function (DUF3049)	1	chr1	769632	770684	5.73435	0.189932	5.47229	0.212166	5.6444	0.130261	5.68721	0.295514	5.51689	0.398985	5.9531	0.696459	5.83496	0.0833372	5.61074	0.0950926	5.81099	0.110816	-0.26	0.44	-0.09	0.76	-0.17	0.9	0.27	0.85	-0.22	0.26	-0.02	0.92
AT1G03180		1	chr1	773411	775344	7.06156	0.0797143	6.76107	0.0352294	6.93867	0.0967189	6.92302	0.299726	7.05279	0.386285	7.08751	0.195263	6.81235	0.225793	7.20505	0.176862	6.98437	0.186649	-0.3	0.07	-0.12	0.4	0.13	0.92	0.16	0.8	0.39	0.35	0.17	0.69
AT1G03190	RAD3-like DNA-binding helicase protein	1	chr1	775527	780062	8.64339	0.0993005	8.78096	0.123243	8.87774	0.0488723	8.96981	0.124865	8.74871	0.157655	8.86624	0.138284	8.85111	0.110512	8.66944	0.157326	8.80593	0.0691072	0.14	0.46	0.23	0.16	-0.22	0.6	-0.1	0.77	-0.18	0.52	-0.05	0.82
AT1G03200		1	chr1	780602	781285	8.53568	0.309175	8.89362	0.131412	8.71725	0.144791	8.91409	0.0918368	8.81172	0.107464	8.82055	0.144418	9.01886	0.301084	8.78814	0.205071	8.70583	0.319292	0.36	0.37	0.18	0.66	-0.1	0.76	-0.09	0.77	-0.23	0.68	-0.31	0.62
AT1G03210	Phenazine biosynthesis PhzC/PhzF protein	1	chr1	782948	784240	11.7982	0.0736218	11.7252	0.0665304	11.6513	0.0543166	11.6905	0.230912	11.7421	0.175728	11.7222	0.0969859	11.8254	0.133901	11.834	0.236101	11.7529	0.149484	-0.07	0.53	-0.15	0.22	0.05	0.95	0.03	0.95	0.01	0.99	-0.07	0.81
AT1G03220	Eukaryotic aspartyl protease family protein	1	chr1	787122	788651	15.7036	0.0776709	15.7375	0.176545	15.8937	0.135579	15.8698	0.110503	16.1059	0.143552	16.2358	0.035534	16.0188	0.0892458	16.2907	0.0749439	16.2479	0.0891541	0.03	0.9	0.19	0.31	0.24	0.53	0.37	0.16	0.27	0.17	0.23	0.25
AT_1_+_2_789174-789323		1	chr1	789174	789323	5.80043	0.0749489	5.71771	0.108432	5.76013	0.187538	5.81662	0.180054	5.95322	0.341896	5.89702	0.366698	5.9954	0.252409	5.873	0.130977	5.96552	0.221846	-0.08	0.6	-0.04	0.89	0.14	0.89	0.08	0.92	-0.12	0.78	-0.03	0.96
AT1G03230	Eukaryotic aspartyl protease family protein	1	chr1	790091	791592	10.3848	0.0768009	10.1324	0.292018	10.7106	0.128787	9.72144	0.320986	9.95728	0.375322	9.90518	0.237604	10.1213	0.18431	10.5322	0.269805	10.608	0.240534	-0.25	0.48	0.33	0.16	0.24	0.85	0.18	0.8	0.41	0.39	0.49	0.29
AT1G03240		0	chr1	792222	792986	5.54176	0.0501366	5.49253	0.111989	5.52398	0.185429	5.57201	0.10154	5.41545	0.181048	5.42339	0.232328	5.44223	0.0875549	5.4647	0.158708	5.52576	0.141924	-0.05	0.75	-0.02	0.95	-0.16	0.75	-0.15	0.75	0.02	0.94	0.08	0.74
AT1G03250		0	chr1	793353	795376	7.25922	0.0719969	7.09323	0.156589	7.03215	0.169989	7.15828	0.357201	6.78636	0.268955	6.7955	0.174929	6.77098	0.195895	6.7837	0.14204	6.80325	0.0746249	-0.17	0.42	-0.23	0.31	-0.37	0.72	-0.36	0.62	0.01	0.98	0.03	0.93
AT1G03260	SNARE associated Golgi protein family	0	chr1	795532	798463	8.13005	0.085853	8.09627	0.133417	8.1072	0.0323909	8.04344	0.0901613	8.16038	0.104388	8.06153	0.0652592	8.53167	0.0735345	8.5111	0.132027	8.42677	0.109452	-0.03	0.88	-0.02	0.85	0.12	0.71	0.02	0.94	-0.02	0.94	-0.1	0.58
AT1G03270	CBS domain-containing protein with a domain of unknown function (DUF21)	1	chr1	799191	802436	7.2481	0.147961	7.40894	0.133532	7.37243	0.228548	6.9551	0.291614	6.91888	0.161561	7.19812	0.151827	6.83867	0.0937263	6.94322	0.193896	6.98421	0.0808133	0.16	0.5	0.12	0.71	-0.04	0.97	0.24	0.69	0.1	0.75	0.15	0.41
AT1G03280	Transcription factor TFIIE, alpha subunit	1	chr1	803035	807066	10.5493	0.064982	10.5433	0.0853681	10.4522	0.0453055	10.5527	0.0203985	10.6199	0.108255	10.7234	0.0976351	10.5964	0.123432	10.5692	0.0642307	10.6434	0.0907312	-0.01	0.97	-0.1	0.31	0.07	0.81	0.17	0.38	-0.03	0.91	0.05	0.84
AT1G03290		1	chr1	807361	810868	11.3284	0.159264	11.4082	0.0699679	11.3655	0.054068	11.5651	0.191488	11.7814	0.17885	11.8046	0.0996864	11.7929	0.259918	11.6909	0.261667	11.6317	0.216308	0.08	0.71	0.04	0.87	0.22	0.72	0.24	0.54	-0.1	0.86	-0.16	0.75
AT1G03300	DOMAIN OF UNKNOWN FUNCTION 724 1	0	chr1	811033	813086	6.76977	0.251731	6.56809	0.0728685	6.57862	0.112249	7.12588	0.256928	6.65968	0.110131	7.01932	0.102026	6.8866	0.166452	6.63974	0.155159	6.62937	0.20517	-0.2	0.51	-0.19	0.55	-0.47	0.42	-0.11	0.83	-0.25	0.45	-0.26	0.49
AT1G03310	debranching enzyme 1	1	chr1	813471	816749	8.74677	0.240448	8.75043	0.0941611	8.80319	0.0898682	8.90567	0.157815	8.82788	0.208654	9.03426	0.0239656	8.78771	0.176712	8.73451	0.156525	8.80228	0.0826608	0	0.99	0.06	0.87	-0.08	0.91	0.13	0.66	-0.05	0.89	0.01	0.97
AT1G03320		1	chr1	817027	817767	5.18534	0.243534	5.03212	0.391165	5.09179	0.186761	5.17061	0.087493	5.17715	0.115477	5.19001	0.273231	5.25504	0.20746	5.19943	0.286037	5.1065	0.249326	-0.15	0.8	-0.09	0.82	0.01	0.99	0.02	0.98	-0.06	0.93	-0.15	0.76
AT1G03330	Small nuclear ribonucleoprotein family protein	0	chr1	817983	819563	13.3027	0.0305684	13.1872	0.0491775	13.1947	0.0376914	13.3887	0.080041	13.461	0.131425	13.406	0.118648	13.2899	0.0696506	13.3642	0.0708552	13.2508	0.0841662	-0.12	0.16	-0.11	0.15	0.07	0.86	0.02	0.96	0.07	0.62	-0.04	0.82
AT1G03340		1	chr1	819662	821317	7.43732	0.0405415	7.32723	0.27041	7.3119	0.194241	7.81894	0.0239553	7.85051	0.0683093	8.01302	0.122519	7.6171	0.164963	7.5622	0.340607	7.63047	0.32024	-0.11	0.75	-0.13	0.59	0.03	0.87	0.19	0.42	-0.05	0.93	0.01	0.98
AT1G03350	BSD domain-containing protein	0	chr1	822638	824393	11.9713	0.105786	12.0187	0.0890966	11.9783	0.037928	12.185	0.0886555	12.2341	0.0483075	12.1958	0.048157	12.1728	0.0508487	12.1189	0.0823704	12.146	0.0589668	0.05	0.79	0.01	0.97	0.05	0.85	0.01	0.96	-0.05	0.71	-0.03	0.82
AT1G03360	ribosomal RNA processing 4	1	chr1	824537	826358	11.0323	0.130217	11.1442	0.179136	11.1268	0.103514	10.9652	0.220034	10.9056	0.198115	10.9677	0.150063	11.0391	0.0575797	11.0648	0.0679459	11.1308	0.170013	0.11	0.68	0.09	0.63	-0.06	0.94	0	1	0.03	0.85	0.09	0.73
AT1G03365	RING/U-box superfamily protein	1	chr1	826569	830383	7.32971	0.106181	7.4212	0.151262	7.3418	0.0797443	7.53318	0.178059	7.60252	0.226747	7.653	0.157149	7.54157	0.136508	7.68732	0.169588	7.65319	0.224317	0.09	0.69	0.01	0.95	0.07	0.93	0.12	0.79	0.15	0.66	0.11	0.78
AT1G03370	C2 calcium/lipid-binding and GRAM domain containing protein	1	chr1	830627	835361	8.95409	0.0991405	9.18981	0.0672206	9.09877	0.100528	9.18671	0.107789	9.03632	0.0509748	9.08454	0.175903	9.09224	0.101552	8.88001	0.130983	8.87937	0.11181	0.24	0.16	0.14	0.38	-0.15	0.54	-0.1	0.79	-0.21	0.38	-0.21	0.34
AT1G03380	homolog of yeast autophagy 18 (ATG18) G	1	chr1	835785	840940	8.54885	0.09614	8.95973	0.113922	8.66607	0.159148	8.73862	0.243762	8.81718	0.170749	8.7906	0.0983428	9.09904	0.124052	8.87166	0.129058	8.73409	0.0595609	0.41	0.1	0.12	0.59	0.08	0.92	0.05	0.92	-0.23	0.38	-0.36	0.14
AT1G03390	HXXXD-type acyl-transferase family protein	0	chr1	841033	842418	5.48149	0.209341	5.62425	0.0829592	5.67496	0.233278	5.72324	0.621583	5.35278	0.139408	5.27175	0.262716	5.36679	0.0846641	5.36738	0.192446	5.5963	0.178793	0.14	0.59	0.19	0.6	-0.37	0.82	-0.45	0.72	0	1	0.23	0.41
AT1G03400	2-oxoglutarate (2OG) and Fe(II)-dependent oxygenase superfamily protein	0	chr1	842747	844190	6.60589	0.113427	6.66546	0.0567043	6.32919	0.13396	6.60098	0.154616	6.94283	0.281569	6.80768	0.333527	6.75294	0.237148	6.93657	0.302154	6.93287	0.637514	0.06	0.7	-0.28	0.23	0.34	0.62	0.21	0.76	0.18	0.75	0.18	0.87
AT1G03410	2-oxoglutarate (2OG) and Fe(II)-dependent oxygenase superfamily protein	0	chr1	844436	847683	6.26631	0.126084	6.55492	0.109648	6.14111	0.0541742	6.06998	0.293091	6.18237	0.234002	6.17234	0.201231	6.35923	0.111278	6.17821	0.389544	5.80523	0.256792	0.29	0.2	-0.13	0.43	0.11	0.91	0.1	0.88	-0.18	0.77	-0.55	0.22
AT1G03420	transposable element gene	1	chr1	846664	847739	10.278	0.190239	10.5233	0.096137	10.4352	0.126354	10.2833	0.11004	10.1233	0.0774865	10.2483	0.132841	9.73892	0.165845	9.63504	0.16885	9.70886	0.126529	0.25	0.34	0.16	0.55	-0.16	0.57	-0.03	0.92	-0.1	0.77	-0.03	0.93
AT1G03430	histidine-containing phosphotransfer factor 5	1	chr1	847873	849500	9.39812	0.0724456	9.38877	0.10394	9.24091	0.149342	9.50227	0.0552467	9.73231	0.162951	9.57256	0.115089	9.57037	0.102296	9.7896	0.0749676	9.56681	0.0941382	-0.01	0.96	-0.16	0.42	0.23	0.52	0.07	0.77	0.22	0.26	0	0.99
AT1G03440	Leucine-rich repeat (LRR) family protein	1	chr1	852366	854032	8.6544	0.108366	8.67585	0.0843759	8.15156	0.0501274	9.52624	0.124544	9.23235	0.247013	9.10355	0.0671469	11.5856	0.187853	11.2774	0.145252	11.0872	0.0398486	0.02	0.92	-0.5	0.07	-0.29	0.62	-0.42	0.18	-0.31	0.37	-0.5	0.14
AT1G03445	Serine/threonine protein phosphatase family protein	0	chr1	854410	859701	5.72406	0.067298	5.91993	0.101158	5.67846	0.226381	5.92521	0.458167	5.969	0.292767	5.77809	0.24769	5.66012	0.165447	6.05334	0.170827	5.77519	0.260232	0.2	0.22	-0.05	0.89	0.04	0.98	-0.15	0.88	0.39	0.28	0.12	0.81
AT1G03457	RNA-binding (RRM/RBD/RNP motifs) family protein	0	chr1	860788	864125	8.03896	0.0747162	7.9706	0.0785241	7.80453	0.0428083	7.996	0.34179	7.90339	0.32136	8.08968	0.0617021	7.68057	0.14621	7.61617	0.0948571	7.40925	0.0818355	-0.07	0.6	-0.23	0.12	-0.09	0.94	0.09	0.89	-0.06	0.81	-0.27	0.29
AT1G03470	Kinase interacting (KIP1-like) family protein	0	chr1	865915	867733	8.98509	0.140304	9.09961	0.0987413	8.75332	0.059981	9.5112	0.21297	9.72393	0.06779	9.56093	0.255624	9.20985	0.17822	9.33699	0.0957229	8.91297	0.165169	0.11	0.57	-0.23	0.24	0.21	0.67	0.05	0.94	0.13	0.68	-0.3	0.39
AT1G03475	Coproporphyrinogen III oxidase	0	chr1	869051	871211	10.3469	0.0915601	10.3666	0.0494858	10.3381	0.0251323	10.3211	0.0790994	10.2007	0.0956282	10.1954	0.0472526	10.2065	0.123572	10.1183	0.103389	10.1384	0.0865222	0.02	0.89	-0.01	0.95	-0.12	0.66	-0.13	0.46	-0.09	0.72	-0.07	0.76
AT1G03490	NAC domain containing protein 6	1	chr1	871874	872906	5.08899	0.18041	4.95116	0.176989	4.98835	0.231466	5.09838	0.294171	5.04668	0.227051	5.15888	0.236533	5.26789	0.157279	5.0499	0.147634	5.13315	0.0377215	-0.14	0.65	-0.1	0.79	-0.05	0.96	0.06	0.94	-0.22	0.48	-0.13	0.56
AT1G03495	HXXXD-type acyl-transferase family protein	1	chr1	873184	874935	6.91249	0.243156	6.76714	0.278984	7.13223	0.321278	7.74311	0.393829	7.94996	0.284964	7.02964	0.363226	7.56467	0.181847	7.74932	0.246453	7.52816	0.169332	-0.15	0.76	0.22	0.65	0.21	0.87	-0.71	0.47	0.18	0.69	-0.04	0.93
AT1G03502	snoRNA	0	chr1	875358	875471	9.14603	0.077163	8.99605	0.09663	8.96643	0.0880102	9.28845	0.169552	9.51696	0.0647333	9.48825	0.0781804	9.91144	0.104151	9.89152	0.0327458	9.75386	0.0789702	-0.15	0.32	-0.18	0.24	0.23	0.54	0.2	0.56	-0.02	0.91	-0.16	0.4
AT1G03506	snoRNA	0	chr1	875518	875604	11.0593	0.149276	10.9389	0.126748	10.9164	0.0439993	10.5524	0.589935	10.7768	0.417416	10.7127	0.372877	10.7421	0.392205	10.8491	0.376576	10.851	0.417613	-0.12	0.61	-0.14	0.43	0.22	0.91	0.16	0.91	0.11	0.91	0.11	0.91
AT1G03510	Tetratricopeptide repeat (TPR)-like superfamily protein	0	chr1	876258	877547	7.45465	0.139587	7.55683	0.0541617	7.53466	0.0846761	7.52239	0.10793	7.5749	0.174319	7.48501	0.208528	7.5789	0.203969	7.55561	0.141963	7.56725	0.0673654	0.1	0.57	0.08	0.69	0.05	0.92	-0.04	0.94	-0.02	0.96	-0.01	0.98
AT1G03520	Core-2/I-branching beta-1,6-N-acetylglucosaminyltransferase family protein	0	chr1	877862	880158	6.25338	0.0968796	6.19669	0.0566809	6.1177	0.117338	6.12067	0.196644	5.88671	0.192702	6.28333	0.10338	6.21874	0.352268	6.03483	0.192811	5.8443	0.3203	-0.06	0.68	-0.14	0.44	-0.23	0.71	0.16	0.69	-0.18	0.76	-0.37	0.59
AT1G03530	nuclear assembly factor 1	0	chr1	880496	883391	8.72188	0.127805	8.79781	0.1968	8.87106	0.152133	8.61046	0.181559	8.6179	0.367052	8.63018	0.165232	8.73958	0.111264	8.57402	0.128646	8.84653	0.149396	0.08	0.81	0.15	0.52	0.01	1	0.02	0.97	-0.17	0.5	0.11	0.7
AT1G03540	Pentatricopeptide repeat (PPR-like) superfamily protein	1	chr1	883782	885611	6.18851	0.0812574	6.45746	0.113313	6.49125	0.208694	6.24609	0.331119	6.23019	0.14624	6.0931	0.30197	6.05114	0.13658	6.18873	0.0942634	6.24911	0.241313	0.27	0.17	0.3	0.28	-0.02	0.99	-0.15	0.86	0.14	0.57	0.2	0.62
AT1G03550	Secretory carrier membrane protein (SCAMP) family protein	0	chr1	885623	887956	9.43762	0.0234931	9.40604	0.214989	9.67386	0.159992	9.41457	0.15841	9.37389	0.238026	9.4301	0.174615	9.51152	0.074247	9.39643	0.159684	9.46408	0.113965	-0.03	0.92	0.24	0.25	-0.04	0.96	0.02	0.98	-0.12	0.67	-0.05	0.82
AT1G03545		1	chr1	885941	887906	5.9061	0.143821	5.7733	0.105487	5.84592	0.1248	5.77684	0.425802	5.83855	0.113738	5.94013	0.141851	6.43323	1.17523	6.24252	0.876877	5.92629	0.234442	-0.13	0.53	-0.06	0.81	0.06	0.96	0.16	0.85	-0.19	0.94	-0.51	0.78
AT1G03560	Pentatricopeptide repeat (PPR-like) superfamily protein	0	chr1	890156	892410	8.60956	0.138028	8.54661	0.0645206	8.53957	0.083229	8.933	0.0749112	8.7769	0.12819	8.8219	0.0595713	8.73011	0.104226	8.66223	0.153655	8.71397	0.12673	-0.06	0.74	-0.07	0.72	-0.16	0.62	-0.11	0.52	-0.07	0.81	-0.02	0.96
AT1G03580		1	chr1	892847	894052	7.28731	0.494145	6.82502	0.274493	6.76713	0.0791801	7.64152	0.239094	7.83006	0.217535	7.70021	0.12886	7.36348	0.157433	7.18077	0.14322	6.95299	0.324397	-0.46	0.49	-0.52	0.38	0.19	0.82	0.06	0.91	-0.18	0.56	-0.41	0.42
AT1G03590	Protein phosphatase 2C family protein	0	chr1	894254	897518	11.3408	0.0635041	11.557	0.138952	11.4434	0.154531	11.3644	0.0892971	11.4671	0.161105	11.3198	0.073601	11.2816	0.0892792	11.4076	0.140912	11.1781	0.213984	0.22	0.26	0.1	0.6	0.1	0.83	-0.04	0.84	0.13	0.61	-0.1	0.77
AT1G03600	photosystem II family protein	1	chr1	898876	899655	8.46374	0.240112	8.30122	0.276689	8.40135	0.131921	8.09028	0.225808	8.45937	0.230485	8.33962	0.267051	7.75924	0.322183	7.93573	0.0943339	7.51027	0.132845	-0.16	0.72	-0.06	0.87	0.37	0.59	0.25	0.7	0.18	0.73	-0.25	0.62
AT1G03610	Protein of unknown function (DUF789)	1	chr1	900887	903003	8.19468	0.0365101	8.54402	0.147756	8.30694	0.0855993	8.23357	0.185735	8.03441	0.183182	8.12173	0.0598507	8.11625	0.0315461	8.16987	0.251166	7.81248	0.122325	0.35	0.13	0.11	0.32	-0.2	0.75	-0.11	0.76	0.05	0.9	-0.3	0.16
AT1G03620	ELMO/CED-12 family protein	0	chr1	904319	906186	8.36094	0.29892	8.36298	0.143282	8.08817	0.132564	8.23047	0.290054	8.39158	0.305623	8.14288	0.208593	9.01666	0.0966632	8.76262	0.154022	8.36088	0.162671	0	1	-0.27	0.47	0.16	0.88	-0.09	0.9	-0.25	0.34	-0.66	0.08
AT1G03630	protochlorophyllide oxidoreductase C	1	chr1	907642	909376	6.53534	0.162085	6.64514	0.151693	6.53988	0.114633	6.75399	0.0793075	6.43968	0.230711	6.6766	0.353981	7.01428	0.553768	6.51114	0.224762	6.82527	0.172658	0.11	0.69	0	0.99	-0.31	0.53	-0.08	0.92	-0.5	0.57	-0.19	0.83
AT1G03650	Acyl-CoA N-acyltransferases (NAT) superfamily protein	0	chr1	910023	911193	6.02071	0.0876204	6.05805	0.15536	5.87228	0.22071	6.1877	0.150967	6.21808	0.230718	6.31557	0.116966	6.47587	0.249814	6.71177	0.275637	6.4502	0.15003	0.04	0.88	-0.15	0.59	0.03	0.97	0.13	0.72	0.24	0.68	-0.03	0.96
AT1G03660	Ankyrin-repeat containing protein	0	chr1	911436	911759	10.1027	0.40693	10.0509	0.154692	10.2205	0.165604	10.2997	0.25106	10.4802	0.26001	10.6902	0.16415	12.0094	0.254161	11.8938	0.0981755	11.833	0.0910825	-0.05	0.94	0.12	0.84	0.18	0.85	0.39	0.48	-0.12	0.78	-0.18	0.65
AT1G03670	ankyrin repeat family protein	0	chr1	914222	916222	5.61399	0.24229	5.57654	0.223349	5.51986	0.0697382	5.42786	0.27988	5.64546	0.0500189	5.33419	0.331458	5.23691	0.0531978	5.56025	0.167888	5.43472	0.354856	-0.04	0.94	-0.09	0.77	0.22	0.75	-0.09	0.91	0.32	0.25	0.2	0.71
AT1G03680	thioredoxin M-type 1	0	chr1	916819	918064	10.4452	0.157213	10.2214	0.110536	10.1209	0.108658	10.2118	0.0929153	10.4912	0.0631308	10.4512	0.183728	10.4171	0.142669	10.6303	0.155262	10.5159	0.0629104	-0.22	0.33	-0.32	0.21	0.28	0.26	0.24	0.52	0.21	0.48	0.1	0.67
AT1G03687	DTW domain-containing protein	1	chr1	918299	920507	9.7934	0.0917543	9.63692	0.0837361	9.86224	0.0922452	9.64493	0.141552	9.63224	0.109009	9.72307	0.114105	9.49041	0.133006	9.71786	0.0488558	9.76725	0.0553129	-0.16	0.3	0.07	0.66	-0.01	0.98	0.08	0.82	0.23	0.29	0.28	0.23
AT1G03700	Uncharacterised protein family (UPF0497)	1	chr1	920950	921901	8.62976	0.207426	8.73581	0.232801	8.56825	0.292645	9.1769	0.293137	8.94605	0.174622	9.19522	0.126069	9.52983	0.266887	9.71286	0.210187	9.54614	0.0899967	0.11	0.79	-0.06	0.9	-0.23	0.79	0.02	0.98	0.18	0.72	0.02	0.98
AT1G03710	Cystatin/monellin superfamily protein	1	chr1	923426	924726	6.19449	0.10402	6.67904	0.206375	6.29182	0.0522582	5.9863	0.205366	6.29632	0.215003	6.12839	0.120136	5.66664	0.19894	6.43192	0.208141	5.92016	0.389697	0.48	0.15	0.1	0.47	0.31	0.63	0.14	0.75	0.77	0.15	0.25	0.69
AT1G03720	Cysteine proteinases superfamily protein	0	chr1	924996	926373	5.67224	0.12762	5.83374	0.174757	5.7074	0.178734	5.85117	0.257441	5.83478	0.0419183	5.75262	0.274496	5.8432	0.323339	5.64922	0.219439	5.72868	0.129364	0.16	0.53	0.04	0.91	-0.02	0.98	-0.1	0.89	-0.19	0.75	-0.11	0.83
AT1G03730		0	chr1	930828	931895	11.4357	0.241728	11.3821	0.144185	11.5126	0.287959	11.5826	0.226328	11.4488	0.353312	11.266	0.198321	11.6226	0.0901899	11.31	0.162402	11.3867	0.223513	-0.05	0.89	0.08	0.88	-0.13	0.9	-0.32	0.56	-0.31	0.27	-0.24	0.49
AT_1_-_0_932682-932831		0	chr1	932682	932831	5.3287	0.2236	5.35928	0.240419	5.1039	0.249591	6.24545	1.47183	5.30318	0.19905	5.2614	0.197612	5.4265	0.194748	5.52832	0.290479	5.41182	0.133349	0.03	0.95	-0.22	0.56	-0.94	0.8	-0.98	0.72	0.1	0.85	-0.01	0.97
AT1G03740	Protein kinase superfamily protein	1	chr1	933512	937043	12.4632	0.212169	12.3252	0.102521	12.4891	0.163594	12.3443	0.0924819	12.3401	0.102274	12.3446	0.181372	12.2185	0.144445	12.0214	0.20568	12.1233	0.0508149	-0.14	0.63	0.03	0.95	0	0.99	0	1	-0.2	0.6	-0.1	0.67
AT1G03743	snoRNA	0	chr1	937207	937287	9.00636	0.152218	9.00899	0.0626151	8.80056	0.0864556	9.31346	0.338116	9.23748	0.265817	9.20712	0.194676	9.32336	0.173662	9.36774	0.101561	9.13063	0.146833	0	0.99	-0.21	0.33	-0.08	0.95	-0.11	0.89	0.04	0.89	-0.19	0.55
AT1G03746	snoRNA	0	chr1	937401	937485	9.45149	0.0735116	9.41879	0.0650449	9.39927	0.0800871	9.17864	0.525311	9.50859	0.275084	9.35123	0.341339	9.22264	0.345628	9.5252	0.392926	9.29196	0.245856	-0.03	0.8	-0.05	0.69	0.33	0.83	0.17	0.89	0.3	0.7	0.07	0.92
AT1G03750	switch 2	1	chr1	937920	941162	8.58587	0.107879	8.53437	0.0579422	8.57781	0.0641605	8.6645	0.080166	8.82102	0.113074	8.83236	0.229271	8.67926	0.122314	8.64735	0.152969	8.59662	0.189687	-0.05	0.74	-0.01	0.97	0.16	0.59	0.17	0.71	-0.03	0.92	-0.08	0.81
AT1G03760	Prefoldin chaperone subunit family protein	0	chr1	941062	943377	10.062	0.0409275	9.93173	0.0515308	9.89525	0.0636243	10.0336	0.152526	10.1787	0.221529	10.1569	0.122581	10.1759	0.0955206	10.4196	0.124738	10.1865	0.115423	-0.13	0.16	-0.17	0.15	0.15	0.84	0.12	0.74	0.24	0.31	0.01	0.97
AT1G03770	RING 1B	1	chr1	944572	947483	7.64193	0.138449	7.75267	0.0826748	7.63177	0.0551288	7.65681	0.0518891	7.78912	0.0680365	7.71652	0.209709	7.75221	0.229453	8.00249	0.141237	7.8512	0.193244	0.11	0.56	-0.01	0.97	0.13	0.45	0.06	0.89	0.25	0.53	0.1	0.83
AT1G03780	targeting protein for XKLP2	0	chr1	947520	951827	7.32055	0.207252	7.37477	0.0307833	7.28718	0.203181	6.98127	0.231043	6.9657	0.0279897	7.14626	0.0884361	6.60013	0.261063	6.65171	0.175869	6.75643	0.246588	0.05	0.85	-0.03	0.94	-0.02	0.98	0.16	0.72	0.05	0.92	0.16	0.77
AT1G03790	Zinc finger C-x8-C-x5-C-x3-H type family protein	1	chr1	954525	956097	6.44851	0.71169	6.17933	0.422772	6.07043	0.660749	6.86761	0.852979	7.05872	0.551313	7.40131	0.53109	6.99843	0.434331	7.25675	0.409679	6.6475	0.330996	-0.27	0.8	-0.38	0.76	0.19	0.95	0.53	0.78	0.26	0.78	-0.35	0.66
AT1G03800	ERF domain protein 10	0	chr1	957261	957998	6.14828	0.154657	6.01363	0.203777	5.96123	0.244082	5.83267	0.283082	5.91436	0.406479	6.00016	0.212152	5.36951	0.21654	5.72408	0.261104	5.49968	0.0694448	-0.13	0.66	-0.19	0.58	0.08	0.95	0.17	0.8	0.35	0.47	0.13	0.7
AT1G03810	Nucleic acid-binding, OB-fold-like protein	1	chr1	958759	959609	5.55085	0.135839	5.4299	0.12965	5.54809	0.192133	5.21784	0.398199	5.4051	0.287202	5.32686	0.382945	5.40161	0.12317	5.3393	0.258845	5.58393	0.473654	-0.12	0.59	0	0.99	0.19	0.88	0.11	0.92	-0.06	0.89	0.18	0.81
AT1G03820		0	chr1	959869	960728	9.02398	0.304425	9.47862	0.121967	9.1375	0.079222	9.13588	0.134342	9.1431	0.174767	9.20667	0.19301	9.37105	0.243552	9.3985	0.215074	9.36309	0.301645	0.45	0.26	0.11	0.78	0.01	0.99	0.07	0.88	0.03	0.96	-0.01	0.99
AT1G03830	guanylate-binding family protein	0	chr1	962016	966757	6.34686	0.157961	6.38353	0.067509	6.33192	0.0409245	6.4104	0.217317	6.05592	0.274582	6.11414	0.233894	6.74224	0.0668671	6.47087	0.238799	6.57741	0.232726	0.04	0.88	-0.01	0.95	-0.35	0.64	-0.3	0.61	-0.27	0.45	-0.16	0.64
AT1G03840	C2H2 and C2HC zinc fingers superfamily protein	0	chr1	967503	970130	10.2128	0.178742	10.1514	0.0691637	10.1135	0.106033	10.0962	0.202605	10.3016	0.0981028	10.2711	0.0411215	10.3878	0.0625517	10.4787	0.0734972	10.6034	0.200385	-0.06	0.81	-0.1	0.69	0.21	0.68	0.17	0.65	0.09	0.52	0.22	0.47
AT1G03850	Glutaredoxin family protein	0	chr1	976097	977761	13.4289	0.050362	13.6119	0.0876226	13.5833	0.0850362	13.7816	0.24979	13.582	0.194764	13.9115	0.0484028	13.3596	0.156833	13.5289	0.137151	13.4784	0.0654536	0.18	0.18	0.15	0.23	-0.2	0.8	0.13	0.78	0.17	0.58	0.12	0.63
AT1G03860	prohibitin 2	0	chr1	979308	981885	12.8862	0.146338	12.8353	0.1041	13.0009	0.103585	12.6623	0.223319	12.7487	0.167785	12.8099	0.0897777	12.685	0.0479333	12.7694	0.153706	12.8951	0.229726	-0.05	0.83	0.11	0.58	0.09	0.91	0.15	0.75	0.08	0.73	0.21	0.53
AT1G03870	FASCICLIN-like arabinoogalactan 9	0	chr1	982506	983540	14.2192	0.261168	14.4365	0.119273	14.4377	0.118808	14.3847	0.250208	14.4484	0.0268391	14.4709	0.254387	13.6487	0.14279	13.5509	0.0777955	13.7058	0.163445	0.22	0.52	0.22	0.51	0.06	0.93	0.09	0.9	-0.1	0.69	0.06	0.87
AT1G03880	cruciferin 2	1	chr1	985751	988146	5.24132	0.216168	5.29474	0.214778	5.32975	0.247564	5.46951	0.260594	5.31028	0.0429962	5.3068	0.27497	5.43039	0.181401	5.58573	0.310139	5.28553	0.178685	0.05	0.9	0.09	0.84	-0.16	0.81	-0.16	0.82	0.16	0.78	-0.14	0.7
AT1G03890	RmlC-like cupins superfamily protein	1	chr1	989198	991020	4.72569	0.166021	4.63087	0.0914529	4.68786	0.137622	4.9491	0.169907	4.59746	0.278479	4.4134	0.184679	4.4331	0.0982341	4.74124	0.314436	4.79654	0.593175	-0.09	0.68	-0.04	0.9	-0.35	0.61	-0.54	0.29	0.31	0.52	0.36	0.68
AT1G03900	non-intrinsic ABC protein 4	1	chr1	991139	993118	13.5809	0.064113	13.3141	0.114186	13.3963	0.016273	13.686	0.301638	13.9751	0.230063	13.8978	0.221972	13.7186	0.12334	14.0555	0.112609	13.8401	0.117791	-0.27	0.16	-0.18	0.12	0.29	0.75	0.21	0.76	0.34	0.22	0.12	0.62
AT1G03905	P-loop containing nucleoside triphosphate hydrolases superfamily protein	1	chr1	993400	995784	10.3856	0.167757	10.2985	0.113565	10.1663	0.114874	10.4925	0.0342577	10.4656	0.162003	10.2442	0.375714	10.3702	0.0489847	10.4848	0.117956	10.3016	0.0432057	-0.09	0.73	-0.22	0.36	-0.03	0.96	-0.25	0.73	0.11	0.54	-0.07	0.46
AT1G03910		1	chr1	996115	1000437	11.4171	0.172857	11.4238	0.142821	11.4543	0.0514555	11.4025	0.278033	11.4379	0.224295	11.552	0.195641	11.3719	0.162549	11.3803	0.327799	11.4362	0.259149	0.01	0.98	0.04	0.88	0.04	0.97	0.15	0.81	0.01	0.99	0.06	0.9
AT1G03920	Protein kinase family protein	1	chr1	1001321	1004383	7.09991	0.161378	7.13388	0.14779	6.84766	0.0485992	7.5429	0.219668	7.80877	0.526203	7.48861	0.251052	6.72711	0.194277	6.76297	0.269804	6.60298	0.114668	0.03	0.92	-0.25	0.24	0.27	0.86	-0.05	0.94	0.04	0.95	-0.12	0.71
AT1G03930	dual specificity kinase 1	1	chr1	1004769	1008370	5.73908	0.209807	5.776	0.2274	5.72251	0.097962	5.75103	0.238224	5.83828	0.207764	5.79336	0.239762	5.69908	0.268425	5.73467	0.19347	5.86968	0.0473626	0.04	0.94	-0.02	0.96	0.09	0.92	0.04	0.95	0.04	0.95	0.17	0.67
AT1G03935	snoRNA	1	chr1	1008810	1008896	11.1654	0.11716	11.0657	0.130866	11.0042	0.0496734	10.7421	0.525744	10.9631	0.381003	10.9011	0.321952	10.896	0.425384	11.0582	0.376415	10.9995	0.397749	-0.1	0.64	-0.16	0.3	0.22	0.9	0.16	0.9	0.16	0.86	0.1	0.92
AT1G03940	HXXXD-type acyl-transferase family protein	0	chr1	1009542	1011056	5.44232	0.195513	5.65653	0.177315	5.55358	0.124414	5.73441	0.313722	5.83778	0.213381	5.84281	0.216328	5.98595	0.345602	5.69364	0.240036	5.83954	0.235983	0.21	0.49	0.11	0.69	0.1	0.92	0.11	0.88	-0.29	0.65	-0.15	0.82
AT1G03950	vacuolar protein sorting-associated protein 2.3	0	chr1	1011172	1013365	10.0572	0.242752	10.056	0.0745353	10.0298	0.0223467	10.0107	0.196376	10.0798	0.148583	10.1713	0.0620187	11.0749	0.0609051	10.8855	0.120093	10.7941	0.131044	0	1	-0.03	0.94	0.07	0.92	0.16	0.67	-0.19	0.34	-0.28	0.23
AT1G03960	Calcium-binding EF hand family protein	1	chr1	1013715	1017929	8.3986	0.0771521	8.24857	0.150512	8.40718	0.134861	8.65386	0.264767	8.56938	0.307118	8.61365	0.14748	8.53275	0.0917086	8.50777	0.320082	8.55357	0.15965	-0.15	0.45	0.01	0.97	-0.08	0.94	-0.04	0.95	-0.02	0.97	0.02	0.95
AT1G03970	G-box binding factor 4	1	chr1	1018100	1019247	10.4351	0.0754965	10.4613	0.127858	10.3973	0.0874771	10.6417	0.149796	10.7652	0.225066	10.8391	0.17137	10.8434	0.185535	10.922	0.0728161	10.7536	0.150724	0.03	0.9	-0.04	0.8	0.12	0.86	0.2	0.64	0.08	0.8	-0.09	0.8
AT1G03980	phytochelatin synthase 2	0	chr1	1018570	1022108	7.35709	0.16246	7.29936	0.157278	7.32741	0.101728	6.98872	0.0334151	7.18984	0.0653669	7.19268	0.080737	7.08214	0.0988078	7.22503	0.228099	7.24365	0.192435	-0.06	0.85	-0.03	0.92	0.2	0.23	0.2	0.26	0.14	0.7	0.16	0.61
AT1G03982	PAK-box/P21-Rho-binding family protein	0	chr1	1022251	1023719	5.67761	0.0810484	5.83493	0.119199	5.82526	0.0567556	5.71764	0.110823	5.65946	0.126289	5.68499	0.296225	5.73666	0.290116	5.63695	0.228731	5.84898	0.197821	0.16	0.36	0.15	0.24	-0.06	0.89	-0.03	0.96	-0.1	0.86	0.11	0.84
AT1G03990	Long-chain fatty alcohol dehydrogenase family protein	1	chr1	1024847	1027616	5.69483	0.127894	5.50901	0.0718291	5.37926	0.274769	5.87369	0.358453	5.70138	0.187155	5.96954	0.178811	5.68116	0.203689	5.75375	0.221067	5.67524	0.17169	-0.19	0.3	-0.32	0.37	-0.17	0.87	0.1	0.9	0.07	0.88	-0.01	0.99
AT1G04000		0	chr1	1028106	1029119	8.28474	0.146933	8.34614	0.0975217	8.19855	0.137055	8.62655	0.0439309	8.38112	0.0823687	8.38566	0.141598	8.75875	0.0970122	8.63626	0.0942142	8.45771	0.142485	0.06	0.79	-0.09	0.73	-0.25	0.24	-0.24	0.4	-0.12	0.54	-0.3	0.26
AT1G04010	phospholipid sterol acyl transferase 1	0	chr1	1031200	1036237	7.96309	0.161408	8.09276	0.139869	8.22518	0.190995	8.09768	0.175221	8.04798	0.147429	8.10241	0.149686	8.28654	0.168409	8.29139	0.15185	8.39699	0.307233	0.13	0.61	0.26	0.37	-0.05	0.94	0	0.99	0	0.99	0.11	0.84
AT1G04020	breast cancer associated RING 1	1	chr1	1036537	1040224	7.87465	0.0333766	8.05821	0.076016	8.12811	0.143233	7.61979	0.254648	7.63414	0.188455	7.72168	0.02671	7.12759	0.155785	7.46781	0.433124	7.41549	0.14668	0.18	0.14	0.25	0.2	0.01	0.99	0.1	0.83	0.34	0.62	0.29	0.35
AT1G04030		1	chr1	1040383	1042892	8.05883	0.0783236	8.23485	0.0625375	7.98595	0.0725056	8.06856	0.101669	8.36315	0.0911595	8.29873	0.0795872	7.86246	0.124253	8.19795	0.0728112	8.09773	0.136785	0.18	0.19	-0.07	0.56	0.29	0.31	0.23	0.36	0.34	0.17	0.24	0.37
AT1G04040	HAD superfamily, subfamily IIIB acid phosphatase	0	chr1	1042362	1043864	13.3748	0.307299	13.4198	0.163547	13.627	0.0891521	13.2141	0.224836	13.302	0.0990816	13.3747	0.150948	12.4371	0.218204	12.9488	0.154594	13.0341	0.102717	0.04	0.93	0.25	0.5	0.09	0.89	0.16	0.75	0.51	0.24	0.6	0.15
AT1G04050	homolog of SU(var)3-9 1	0	chr1	1045598	1049297	6.81455	0.192264	6.825	0.0544858	6.88566	0.0913386	7.01873	0.184749	6.77559	0.215529	7.11658	0.133492	6.97796	0.179379	6.97637	0.189141	7.15825	0.238933	0.01	0.97	0.07	0.8	-0.24	0.71	0.1	0.82	0	1	0.18	0.68
AT1G04070	translocase of outer membrane 22-I	0	chr1	1050553	1051186	7.3913	0.123693	7.15502	0.172535	7.0138	0.0821902	7.91868	0.0616082	7.75262	0.198909	7.61177	0.162523	8.01095	0.120939	7.95373	0.0649318	7.88072	0.0807863	-0.24	0.35	-0.38	0.13	-0.17	0.74	-0.31	0.37	-0.06	0.78	-0.13	0.53
AT1G04080	Tetratricopeptide repeat (TPR)-like superfamily protein	1	chr1	1051312	1056827	10.7846	0.100301	10.8288	0.0732027	10.9153	0.0793883	10.8284	0.178421	10.8632	0.0815531	11.0156	0.0990182	10.9263	0.0784032	10.9234	0.0838958	11.1127	0.194151	0.04	0.78	0.13	0.38	0.03	0.95	0.19	0.62	0	0.99	0.19	0.53
AT1G04090	Plant protein of unknown function (DUF946)	1	chr1	1057151	1059419	6.68892	0.158569	6.86561	0.145513	6.73596	0.200336	6.76011	0.230839	6.78811	0.158099	6.91594	0.166652	7.02235	0.323178	7.03138	0.204848	7.03889	0.284606	0.18	0.49	0.05	0.9	0.03	0.97	0.16	0.77	0.01	0.99	0.02	0.98
AT1G04100	indoleacetic acid-induced protein 10	1	chr1	1059506	1061191	7.49116	0.0729489	7.49679	0.351103	7.55923	0.243777	7.47453	0.384584	7.43405	0.273936	7.55205	0.143452	7.93617	0.0907514	7.91097	0.224265	7.89058	0.17612	0.01	0.99	0.07	0.84	-0.04	0.98	0.08	0.93	-0.03	0.95	-0.05	0.89
AT1G04110	Subtilase family protein	0	chr1	1061457	1063784	5.03602	0.171736	5.14392	0.0410246	4.99565	0.125966	5.21596	0.123948	5.20818	0.115846	5.23461	0.108612	5.11105	0.264858	5.04663	0.214179	5.04671	0.236187	0.11	0.61	-0.04	0.89	-0.01	0.99	0.02	0.96	-0.06	0.91	-0.06	0.91
AT1G04120	multidrug resistance-associated protein 5	0	chr1	1064450	1071047	8.61456	0.229777	8.7348	0.0784722	8.88489	0.179424	8.54759	0.209604	8.69202	0.240189	8.81919	0.118987	8.38623	0.174626	8.24925	0.134611	8.42004	0.153292	0.12	0.69	0.27	0.43	0.14	0.86	0.27	0.54	-0.14	0.68	0.03	0.93
AT1G04130	Tetratricopeptide repeat (TPR)-like superfamily protein	1	chr1	1073427	1075568	7.99916	0.170822	8.07921	0.0816706	8.15532	0.127672	7.97118	0.0614506	8.0164	0.161159	8.08631	0.0969495	8.44168	0.0319255	8.54849	0.134459	8.59196	0.161177	0.08	0.74	0.16	0.53	0.05	0.92	0.12	0.58	0.11	0.6	0.15	0.52
AT1G04140	Transducin family protein / WD-40 repeat family protein	0	chr1	1075543	1080630	9.84165	0.223033	10.1298	0.0629465	10.0541	0.145994	9.70266	0.283569	9.55313	0.230281	9.78134	0.111407	9.74444	0.271086	9.51032	0.163842	9.63612	0.0567599	0.29	0.31	0.21	0.49	-0.15	0.87	0.08	0.89	-0.23	0.62	-0.11	0.8
AT1G04150	C2 calcium/lipid-binding plant phosphoribosyltransferase family protein	0	chr1	1081208	1084246	6.72817	0.114465	6.63131	0.244172	6.51977	0.138816	6.24592	0.325711	6.49482	0.158505	6.59208	0.282314	6.3567	0.338845	6.32835	0.237397	6.54121	0.15086	-0.1	0.78	-0.21	0.33	0.25	0.78	0.35	0.66	-0.03	0.97	0.18	0.74
AT1G04160	myosin XI B	1	chr1	1086495	1096146	8.0164	0.173257	8.1825	0.106228	8.3865	0.120006	7.9775	0.0810608	7.7108	0.0648158	8.10966	0.160787	7.96718	0.155255	7.77937	0.163212	8.13407	0.100263	0.17	0.49	0.37	0.2	-0.27	0.25	0.13	0.69	-0.19	0.57	0.17	0.52
AT1G04170	eukaryotic translation initiation factor 2 gamma subunit	1	chr1	1096946	1099898	12.6997	0.214785	12.8489	0.0774008	12.7866	0.114057	12.8394	0.226904	12.4936	0.231668	12.6929	0.0534419	12.7355	0.069013	12.5742	0.0674627	12.6885	0.0914924	0.15	0.58	0.09	0.78	-0.35	0.62	-0.15	0.74	-0.16	0.28	-0.05	0.78
AT1G04171		0	chr1	1100444	1100608	5.53226	0.159503	5.39776	0.142805	5.32149	0.154542	5.31651	0.249402	5.36219	0.173258	5.46639	0.321802	5.23648	0.10195	5.33914	0.251224	5.35738	0.177303	-0.13	0.6	-0.21	0.42	0.05	0.96	0.15	0.84	0.1	0.8	0.12	0.69
AT1G04180	YUCCA 9	1	chr1	1104623	1105988	6.52332	0.181624	6.6009	0.162829	6.54335	0.148768	6.7596	0.184271	6.92455	0.354886	6.63592	0.225354	6.34624	0.0623913	6.67999	0.340029	6.90183	0.286629	0.08	0.81	0.02	0.96	0.16	0.87	-0.12	0.82	0.33	0.51	0.56	0.24
AT1G04190	Tetratricopeptide repeat (TPR)-like superfamily protein	0	chr1	1106428	1108715	10.8869	0.197688	10.9175	0.0733691	10.8972	0.0618302	11.0526	0.206046	10.9203	0.246886	10.993	0.104998	10.906	0.0905958	11.0069	0.0857094	11.0356	0.118844	0.03	0.92	0.01	0.98	-0.13	0.87	-0.06	0.9	0.1	0.58	0.13	0.54
AT1G04200		1	chr1	1109482	1114107	7.17903	0.126323	7.13911	0.0271472	7.11663	0.0738565	7.47656	0.210038	7.39926	0.361674	7.6186	0.242656	7.448	0.170434	7.61286	0.186338	7.59761	0.15138	-0.04	0.82	-0.06	0.73	-0.08	0.95	0.14	0.81	0.16	0.67	0.15	0.65
AT1G04210	Leucine-rich repeat protein kinase family protein	1	chr1	1114405	1119739	6.92964	0.0365423	6.80782	0.11782	6.79981	0.200527	7.10086	0.268553	6.97366	0.198221	7.11956	0.154868	6.97787	0.10758	6.98041	0.375145	7.04529	0.154372	-0.12	0.41	-0.13	0.59	-0.13	0.88	0.02	0.98	0	1	0.07	0.82
AT1G04220	3-ketoacyl-CoA synthase 2	0	chr1	1119699	1122526	10.5275	0.242204	10.633	0.227765	10.8061	0.101968	10.8751	0.177757	10.6174	0.284128	10.8674	0.137044	11.7647	0.139167	11.6346	0.09207	11.6402	0.108897	0.11	0.81	0.28	0.37	-0.26	0.75	-0.01	0.99	-0.13	0.6	-0.12	0.63
AT1G04230	Protein of unknown function (DUF2361)	1	chr1	1125518	1128168	7.40066	0.0857772	7.53216	0.0357963	7.34116	0.101215	7.77577	0.0712117	7.64464	0.181799	7.75574	0.134507	7.87604	0.140071	7.88003	0.149663	7.76266	0.148936	0.13	0.26	-0.06	0.71	-0.13	0.79	-0.02	0.95	0	0.99	-0.11	0.71
AT1G04240	AUX/IAA transcriptional regulator family protein	0	chr1	1128188	1129551	9.50932	0.330526	9.48549	0.0618647	9.77116	0.106682	10.4409	0.262493	9.24614	0.355266	9.77038	0.142211	9.59948	0.134455	9.31721	0.110858	9.3669	0.101953	-0.02	0.96	0.26	0.52	-1.19	0.23	-0.67	0.27	-0.28	0.29	-0.23	0.34
AT1G04250	AUX/IAA transcriptional regulator family protein	1	chr1	1136258	1138613	12.7293	0.243681	13.012	0.0435845	13.0983	0.0931675	12.6149	0.247185	12.3908	0.0907386	12.5361	0.180825	12.6577	0.203378	12.5263	0.120147	12.6659	0.0670939	0.28	0.34	0.37	0.26	-0.22	0.71	-0.08	0.9	-0.13	0.71	0.01	0.98
AT1G04260	CAMV movement protein interacting protein 7	0	chr1	1140528	1141365	9.55101	0.326536	9.3488	0.107997	9.33896	0.0208127	9.23977	0.303508	9.09551	0.163486	8.95444	0.144785	9.37713	0.419766	9.12941	0.169959	9.03585	0.0888161	-0.2	0.62	-0.21	0.58	-0.14	0.87	-0.29	0.64	-0.25	0.72	-0.34	0.58
AT1G04270	cytosolic ribosomal protein S15	0	chr1	1141604	1143053	13.706	0.093974	13.5802	0.0462581	13.8455	0.163657	13.1329	0.31757	13.3297	0.244913	13.4264	0.260143	13.1304	0.178692	13.2491	0.124057	13.442	0.131718	-0.13	0.32	0.14	0.52	0.2	0.85	0.29	0.7	0.12	0.72	0.31	0.34
AT1G04280	P-loop containing nucleoside triphosphate hydrolases superfamily protein	0	chr1	1143436	1146654	6.0717	0.0585344	6.19178	0.145704	5.84503	0.0432348	6.37852	0.183722	6.47196	0.157005	6.39983	0.2156	6.36268	0.117825	6.42836	0.148951	6.20533	0.171442	0.12	0.52	-0.23	0.1	0.09	0.88	0.02	0.97	0.07	0.82	-0.16	0.6
AT1G04290	Thioesterase superfamily protein	0	chr1	1147523	1148533	10.565	0.0745745	10.3963	0.0761126	10.4078	0.0939354	10.5426	0.147497	10.7613	0.279678	10.6585	0.153414	10.3527	0.128179	10.7645	0.265849	10.6084	0.0683427	-0.17	0.22	-0.16	0.29	0.22	0.78	0.12	0.77	0.41	0.34	0.26	0.26
AT1G04295	other RNA	1	chr1	1147781	1148435	7.73107	0.19833	7.63215	0.160842	7.63318	0.175451	7.51556	0.177262	7.59614	0.216497	7.58537	0.0735968	7.37028	0.0540734	7.69197	0.154555	7.60269	0.1874	-0.1	0.76	-0.1	0.77	0.08	0.91	0.07	0.85	0.32	0.23	0.23	0.4
AT1G04300	TRAF-like superfamily protein	0	chr1	1148597	1154652	8.78584	0.17897	9.18263	0.126201	8.88599	0.0808149	8.93759	0.366441	8.64602	0.280807	8.88726	0.292907	9.0839	0.294613	8.49841	0.260596	8.69228	0.194938	0.4	0.18	0.1	0.67	-0.29	0.8	-0.05	0.96	-0.59	0.32	-0.39	0.43
AT1G04310	ethylene response sensor 2	0	chr1	1154764	1157711	7.33884	0.432098	7.47594	0.293517	7.25737	0.321945	7.38664	0.609881	7.26295	0.32658	7.06488	0.258414	7.27351	0.100296	7.25573	0.149822	7.08194	0.179809	0.14	0.85	-0.08	0.92	-0.12	0.95	-0.32	0.79	-0.02	0.96	-0.19	0.51
AT1G04320	pre-tRNA	1	chr1	1159023	1159093	11.0761	0.184378	11.1067	0.121365	10.7456	0.171417	11.3899	0.226846	11.1601	0.227063	11.1366	0.108075	11.4867	0.320009	11.3413	0.287114	11.3221	0.386807	0.03	0.93	-0.33	0.29	-0.23	0.77	-0.25	0.58	-0.15	0.83	-0.16	0.83
AT1G04330		0	chr1	1161311	1161982	6.94004	0.0575125	6.94441	0.0889127	7.02452	0.25734	6.6453	0.0691261	6.79802	0.250182	6.90824	0.27342	6.895	0.204941	6.85254	0.198559	7.01043	0.131099	0	0.98	0.08	0.8	0.15	0.82	0.26	0.61	-0.04	0.93	0.12	0.75
AT1G04340	HR-like lesion-inducing protein-related	0	chr1	1163097	1164851	11.6519	0.176317	11.276	0.1468	11.4007	0.0488506	11.4554	0.271126	11.5372	0.42083	11.5676	0.243764	11.1135	0.131914	11.4013	0.0952706	11.4076	0.191174	-0.38	0.21	-0.25	0.27	0.08	0.95	0.11	0.87	0.29	0.26	0.29	0.38
AT1G04350	2-oxoglutarate (2OG) and Fe(II)-dependent oxygenase superfamily protein	1	chr1	1165165	1166768	8.1676	0.0849805	8.13884	0.101143	7.75443	0.0150553	8.29855	0.14053	8.17402	0.198435	8.03718	0.218471	8.4295	0.134593	8.41574	0.135811	7.9247	0.218954	-0.03	0.88	-0.41	0.06	-0.12	0.84	-0.26	0.58	-0.01	0.97	-0.5	0.22
AT1G04360	RING/U-box superfamily protein	0	chr1	1167457	1168878	8.15967	0.340688	8.39496	0.126855	8.33209	0.0666766	8.67696	0.176483	8.58076	0.175703	8.66699	0.12002	8.43728	0.180683	8.41999	0.160703	8.30328	0.208	0.24	0.59	0.17	0.68	-0.1	0.88	-0.01	0.98	-0.02	0.97	-0.13	0.74
AT_1_+_1_1170737-1170865		1	chr1	1170738	1170866	4.94636	0.259611	5.22271	0.200988	5.06481	0.221801	4.87398	0.0845644	5.11895	0.156512	5.10441	0.187441	5.00086	0.103867	5.01253	0.282297	5.14966	0.312615	0.28	0.48	0.12	0.79	0.24	0.5	0.23	0.54	0.01	0.98	0.15	0.76
AT1G04370	Ethylene-responsive element binding factor 14	1	chr1	1175177	1175578	6.08181	0.271007	6.04094	0.466647	6.16859	0.553175	7.04881	0.40831	6.12417	0.472321	6.16399	0.206968	6.97628	0.315768	6.46812	0.555327	6.88908	0.381276	-0.04	0.96	0.09	0.92	-0.92	0.47	-0.88	0.32	-0.51	0.59	-0.09	0.92
AT1G04380	2-oxoglutarate (2OG) and Fe(II)-dependent oxygenase superfamily protein	0	chr1	1176921	1178407	7.6156	0.116678	8.16631	0.448401	7.46787	0.23009	7.43891	0.813028	6.94547	0.301457	7.1403	0.52781	7.33289	0.533229	6.96895	0.571387	6.9243	0.413064	0.55	0.33	-0.15	0.63	-0.49	0.83	-0.3	0.87	-0.36	0.76	-0.41	0.68
AT1G04390	BTB/POZ domain-containing protein	0	chr1	1179363	1183704	7.59048	0.126729	7.72415	0.100829	7.55109	0.0619366	7.72059	0.0780441	7.64114	0.0607488	7.76682	0.126442	7.92812	0.197284	7.6421	0.16737	7.63395	0.130893	0.13	0.49	-0.04	0.83	-0.08	0.73	0.05	0.87	-0.29	0.44	-0.29	0.38
gb__EG518955		1	chr1	1184595	1184961	4.57384	0.0683845	4.4668	0.209801	4.73281	0.116737	5.00187	0.863038	4.57918	0.233872	4.45412	0.26096	4.35676	0.197337	4.6004	0.310084	4.54041	0.268811	-0.11	0.69	0.16	0.33	-0.42	0.85	-0.55	0.75	0.24	0.66	0.18	0.71
AT_1_-_2_1184749-1184961		0	chr1	1184750	1184962	4.97057	0.181072	4.96293	0.230095	5.11374	0.125186	5.07912	0.114912	5.09702	0.183149	5.23493	0.301471	5.28159	0.350887	5.30047	0.225591	4.9473	0.169549	-0.01	0.99	0.14	0.58	0.02	0.98	0.16	0.8	0.02	0.98	-0.33	0.55
AT1G04400	cryptochrome 2	0	chr1	1185550	1188517	13.2853	0.0930248	13.4534	0.092261	13.3727	0.0366203	13.2351	0.0761456	13.3049	0.0334554	13.2644	0.0199541	12.9511	0.122109	13.0413	0.0703703	12.9164	0.0617839	0.17	0.29	0.09	0.45	0.07	0.72	0.03	0.84	0.09	0.67	-0.03	0.87
AT1G04410	Lactate/malate dehydrogenase family protein	0	chr1	1189078	1191412	12.1335	0.0562454	12.3348	0.0151163	12.2979	0.0231743	12.2312	0.0542018	12.211	0.119677	12.2522	0.0925469	11.979	0.0821553	11.9215	0.0663421	11.9362	0.12468	0.2	0.07	0.16	0.12	-0.02	0.96	0.02	0.92	-0.06	0.72	-0.04	0.85
AT1G04420	NAD(P)-linked oxidoreductase superfamily protein	1	chr1	1191608	1193884	9.04848	0.07406	9.03157	0.148699	8.99296	0.0584347	9.27004	0.256367	9.27885	0.0798144	9.29638	0.075018	9.18839	0.10172	9.24575	0.159356	9.07008	0.166011	-0.02	0.95	-0.06	0.62	0.01	0.99	0.03	0.97	0.06	0.85	-0.12	0.68
AT1G04425	other RNA	1	chr1	1194187	1196889	9.01969	0.0746504	8.68332	0.127763	8.78668	0.179646	8.83806	0.146291	8.67389	0.119475	8.75098	0.113355	7.95346	0.0756617	8.09356	0.157781	8.07928	0.116378	-0.34	0.13	-0.23	0.32	-0.16	0.7	-0.09	0.8	0.14	0.59	0.13	0.52
AT1G04430	S-adenosyl-L-methionine-dependent methyltransferases superfamily protein	1	chr1	1198118	1201527	10.4954	0.172959	10.5833	0.128757	10.6533	0.100262	10.2918	0.124263	10.2654	0.176275	10.2863	0.22323	9.7941	0.178848	9.93437	0.234516	10.0758	0.237847	0.09	0.75	0.16	0.5	-0.03	0.97	-0.01	0.99	0.14	0.75	0.28	0.5
AT1G04440	casein kinase like 13	1	chr1	1202255	1205803	13.4059	0.10039	13.5309	0.108838	13.664	0.0523835	13.3631	0.101046	13.4824	0.0464528	13.583	0.142273	13.3432	0.143029	13.2861	0.161191	13.2236	0.0941606	0.12	0.48	0.26	0.15	0.12	0.61	0.22	0.49	-0.06	0.87	-0.12	0.63
AT1G04445	C2H2-like zinc finger protein	1	chr1	1207344	1207862	5.99943	0.180615	6.16188	0.148713	5.92288	0.135113	5.68678	0.316386	5.7535	0.461429	5.83135	0.157042	5.85338	0.225008	5.51394	0.133782	5.69051	0.439389	0.16	0.56	-0.08	0.79	0.07	0.97	0.14	0.83	-0.34	0.37	-0.16	0.83
AT1G04450	ROP-interactive CRIB motif-containing protein 3	1	chr1	1208521	1209874	5.24098	0.156839	5.37706	0.210675	5.29896	0.133531	5.74232	0.1716	5.42976	0.110976	5.42971	0.0868996	5.6028	0.302848	5.5267	0.358126	5.50831	0.168794	0.14	0.67	0.06	0.83	-0.31	0.46	-0.31	0.4	-0.08	0.92	-0.09	0.86
AT1G04457		0	chr1	1210319	1210549	6.69355	0.325296	6.65336	0.268719	6.73096	0.238913	6.61468	0.276819	7.15889	0.682142	6.98142	0.531543	7.58575	0.235274	7.71909	0.113829	7.64765	0.0931037	-0.04	0.95	0.04	0.95	0.54	0.76	0.37	0.75	0.13	0.74	0.06	0.88
AT1G04470	Protein of unknown function (DUF810)	0	chr1	1211049	1214662	4.93161	0.0798713	4.88588	0.286346	5.04017	0.214777	5.0475	0.140241	5.00938	0.233203	5.19348	0.104073	5.34516	0.278988	5.08637	0.555854	5.17123	0.177275	-0.05	0.92	0.11	0.7	-0.04	0.96	0.15	0.65	-0.26	0.78	-0.17	0.72
AT1G04480	Ribosomal protein L14p/L23e family protein	1	chr1	1216095	1217467	15.9514	0.130214	15.9395	0.129875	16.1072	0.0430679	15.863	0.276401	15.942	0.204967	15.9783	0.142707	15.8813	0.0613402	16.0208	0.206225	16.0291	0.183777	-0.01	0.97	0.16	0.34	0.08	0.93	0.12	0.84	0.14	0.67	0.15	0.6
AT1G04490	Protein of unknown function (DUF3527)	0	chr1	1217948	1220137	7.42507	0.202821	7.37768	0.126517	7.27346	0.213306	7.86509	0.0661381	7.83325	0.169116	7.89232	0.210875	7.45952	0.275126	7.30388	0.0546054	7.44909	0.0514429	-0.05	0.89	-0.15	0.67	-0.03	0.95	0.03	0.96	-0.16	0.71	-0.01	0.98
AT1G04500	CCT motif family protein	0	chr1	1221433	1224366	5.17701	0.215136	5.38471	0.160569	5.24987	0.122709	5.30432	0.229238	5.14913	0.221294	5.24876	0.0869336	5.20641	0.15555	5.44091	0.261201	5.15977	0.204863	0.21	0.51	0.07	0.82	-0.16	0.85	-0.06	0.91	0.23	0.6	-0.05	0.91
AT1G04501		1	chr1	1224552	1224680	5.06229	0.128053	4.78592	0.375426	4.76366	0.122616	5.02922	0.362468	4.97233	0.409305	4.91888	0.228365	5.0412	0.408393	5.00358	0.127809	4.93963	0.150526	-0.28	0.56	-0.3	0.21	-0.06	0.97	-0.11	0.9	-0.04	0.96	-0.1	0.88
AT1G04510	MOS4-associated complex 3A	1	chr1	1226575	1230827	11.3016	0.0842088	10.9634	0.0507412	11.3505	0.136698	10.8554	0.269723	11.1504	0.0972352	11.1496	0.114191	10.8085	0.289689	11.1194	0.0968365	11.2256	0.181751	-0.34	0.07	0.05	0.82	0.29	0.63	0.29	0.58	0.31	0.48	0.42	0.39
AT1G04520	plasmodesmata-located protein 2	1	chr1	1231578	1234032	8.08279	0.185077	8.11372	0.21387	8.13764	0.104046	8.13664	0.185641	8.0324	0.295397	8.21123	0.11219	8.79803	0.137708	8.82623	0.108139	9.00872	0.0883715	0.03	0.94	0.05	0.85	-0.1	0.91	0.07	0.86	0.03	0.93	0.21	0.37
AT1G04530	Tetratricopeptide repeat (TPR)-like superfamily protein	0	chr1	1234176	1236034	9.91293	0.0834544	9.9442	0.15885	9.96177	0.0666811	10.0568	0.122032	10.2449	0.157533	10.204	0.129305	9.98177	0.141402	10.0649	0.303358	10.0644	0.194313	0.03	0.9	0.05	0.71	0.19	0.67	0.15	0.65	0.08	0.88	0.08	0.82
AT1G04540	Calcium-dependent lipid-binding (CaLB domain) family protein	1	chr1	1237256	1239061	5.60686	0.279207	5.39912	0.140588	5.54013	0.212973	5.32512	0.156759	5.15156	0.110741	5.23007	0.282608	4.99482	0.340101	5.18835	0.197062	5.07029	0.138252	-0.21	0.58	-0.07	0.89	-0.17	0.69	-0.1	0.88	0.19	0.75	0.08	0.9
AT_1_+_1_1239848-1239949		1	chr1	1239849	1239950	5.12766	0.246846	5.31283	0.171285	5.23892	0.243302	5.43189	0.206899	5.48034	0.0999636	5.54868	0.108371	5.37333	0.207075	5.45531	0.0543922	5.48886	0.277236	0.19	0.61	0.11	0.8	0.05	0.94	0.12	0.79	0.08	0.8	0.12	0.83
AT1G04550	AUX/IAA transcriptional regulator family protein	1	chr1	1240375	1242121	10.2305	0.0407398	10.26	0.1775	10.248	0.0409007	10.689	0.121086	10.3131	0.42432	10.4448	0.0364575	10.5615	0.185365	10.3795	0.245404	10.5893	0.161071	0.03	0.91	0.02	0.82	-0.38	0.71	-0.24	0.32	-0.18	0.7	0.03	0.95
AT1G04555		1	chr1	1242558	1244244	5.93451	0.131928	5.87934	0.154429	6.0668	0.142767	6.50588	0.539495	6.22849	0.0862884	6.19259	0.350772	6.53298	0.11368	6.53133	0.341639	6.43138	0.104164	-0.06	0.84	0.13	0.56	-0.28	0.84	-0.31	0.79	0	1	-0.1	0.65
AT1G04560	AWPM-19-like family protein	1	chr1	1244947	1246059	4.97465	0.254444	5.03586	0.201013	4.87726	0.109995	4.91003	0.213012	4.86113	0.326096	4.70248	0.209702	5.1354	0.434307	4.9385	0.0628368	4.66284	0.247081	0.06	0.9	-0.1	0.78	-0.05	0.97	-0.21	0.71	-0.2	0.77	-0.47	0.5
AT1G04570	Major facilitator superfamily protein	0	chr1	1246728	1248775	6.84104	0.157968	6.68106	0.187	6.57201	0.137156	7.15758	0.236696	7.03234	0.372972	6.71009	0.338018	7.10418	0.211878	7.06607	0.106832	7.02015	0.146682	-0.16	0.58	-0.27	0.29	-0.13	0.92	-0.45	0.55	-0.04	0.93	-0.08	0.83
CUFF.1745		0	chr1	1251405	1251616	5.70593	0.08841	5.73259	0.263726	6.08796	0.715712	5.25066	0.242427	5.55922	0.709818	5.15673	0.0889791	5.04792	0.0929143	5.4037	0.647969	5.42785	0.197054	0.03	0.95	0.38	0.66	0.31	0.87	-0.09	0.85	0.36	0.72	0.38	0.26
AT1G04580	aldehyde oxidase 4	0	chr1	1252122	1257510	5.71489	0.16031	5.73204	0.104998	5.57713	0.152552	6.05163	0.259319	6.13427	0.360576	5.9374	0.151759	6.1102	0.0651781	6.07419	0.110447	5.76479	0.153138	0.02	0.95	-0.14	0.59	0.08	0.95	-0.11	0.84	-0.04	0.86	-0.35	0.21
AT1G04590		0	chr1	1258577	1261426	9.13222	0.108904	9.04895	0.101875	9.21528	0.167344	8.97536	0.0967349	8.95331	0.103434	9.17266	0.191526	9.00142	0.134781	9.032	0.0641861	9.29794	0.171433	-0.08	0.64	0.08	0.74	-0.02	0.96	0.2	0.62	0.03	0.9	0.3	0.35
AT1G04600	myosin XI A	1	chr1	1262123	1272376	5.80017	0.105003	5.75166	0.124687	5.74638	0.0635307	5.81029	0.354915	5.6852	0.185567	5.74215	0.327128	5.63302	0.226977	5.65381	0.150491	5.99233	0.1202	-0.05	0.82	-0.05	0.72	-0.13	0.91	-0.07	0.95	0.02	0.97	0.36	0.34
AT_1_+_2_1276911-1277096		1	chr1	1276912	1277097	5.28769	0.321129	5.15344	0.164338	5.32849	0.113054	5.24953	0.247305	5.58077	0.683813	5.39772	0.122524	5.38044	0.165414	5.44022	0.140871	5.36305	0.190826	-0.13	0.77	0.04	0.93	0.33	0.86	0.15	0.77	0.06	0.86	-0.02	0.97
AT1G04610	YUCCA 3	1	chr1	1279388	1281618	9.48821	0.125126	9.66655	0.225624	9.47777	0.202702	9.06217	0.203637	9.13707	0.20567	9.03459	0.149126	9.08595	0.225162	9.29482	0.22536	9.34047	0.239488	0.18	0.56	-0.01	0.98	0.07	0.92	-0.03	0.96	0.21	0.66	0.25	0.59
AT1G04620	coenzyme F420 hydrogenase family / dehydrogenase, beta subunit family	0	chr1	1282741	1286584	7.84859	0.456393	7.12874	0.125193	6.92815	0.128426	8.4212	0.0761895	8.38349	0.159349	8.42778	0.227921	8.49839	0.213721	8.4012	0.203215	8.23559	0.159455	-0.72	0.24	-0.92	0.18	-0.04	0.94	0.01	0.99	-0.1	0.83	-0.26	0.49
AT_1_-_1_1287242-1287343		0	chr1	1287243	1287344	4.69521	0.437624	4.97417	0.253141	4.81779	0.0934534	5.04922	0.171938	5.38226	0.966931	4.88751	0.0745013	4.85079	0.0432072	4.97105	0.153842	5.19568	0.415791	0.28	0.65	0.12	0.84	0.33	0.9	-0.16	0.64	0.12	0.61	0.34	0.57
AT1G04625	Polynucleotidyl transferase, ribonuclease H-like superfamily protein	0	chr1	1287831	1289820	5.48386	0.1125	5.63469	0.142636	5.50068	0.263081	5.90419	0.12123	5.8898	0.246928	5.8726	0.216741	5.98889	0.127579	5.73195	0.124411	5.69228	0.366976	0.15	0.48	0.02	0.97	-0.01	0.99	-0.03	0.95	-0.26	0.33	-0.3	0.6
AT1G04630	GRIM-19 protein	0	chr1	1289734	1291112	12.4698	0.0325892	12.4792	0.124534	12.6015	0.142751	11.9546	0.23636	11.9341	0.15686	12.0221	0.190494	11.8907	0.101333	11.7938	0.178691	11.9678	0.129557	0.01	0.96	0.13	0.44	-0.02	0.98	0.07	0.91	-0.1	0.76	0.08	0.75
AT1G04635	ribonuclease P family protein / Rpp14 family protein	1	chr1	1291314	1291995	7.87084	0.19589	7.97781	0.0667566	7.88575	0.0360367	8.30172	0.129981	8.11392	0.267475	8.13126	0.116055	8.1963	0.117294	8.19631	0.123726	8.17984	0.141886	0.11	0.67	0.01	0.96	-0.19	0.8	-0.17	0.59	0	1	-0.02	0.96
AT1G04640	lipoyltransferase 2	1	chr1	1292080	1293357	10.1589	0.192384	10.0324	0.146704	9.92698	0.030956	10.169	0.125606	10.2139	0.140343	10.1585	0.0507436	10.1508	0.0935569	10.155	0.0712443	9.91528	0.0990092	-0.13	0.67	-0.23	0.32	0.04	0.93	-0.01	0.97	0	0.99	-0.24	0.26
AT1G04645	Plant self-incompatibility protein S1 family	0	chr1	1293770	1294263	5.3795	0.093963	5.33464	0.349476	5.40241	0.236355	5.29273	0.0931632	5.24574	0.138788	5.22292	0.263507	5.43006	0.343864	5.28388	0.047741	5.25708	0.149814	-0.04	0.93	0.02	0.95	-0.05	0.92	-0.07	0.9	-0.15	0.78	-0.17	0.76
AT1G04650		0	chr1	1294893	1299002	7.60641	0.174949	7.68504	0.132375	7.45908	0.0998046	7.81965	0.244708	7.80766	0.10566	7.86965	0.244186	8.99121	0.166576	8.94047	0.181583	8.89256	0.18405	0.08	0.78	-0.15	0.53	-0.01	0.99	0.05	0.95	-0.05	0.9	-0.1	0.79
AT1G04660	glycine-rich protein	0	chr1	1300486	1301773	6.7707	0.101459	6.85419	0.0992307	6.56062	0.090533	7.27035	0.230251	7.58728	0.217729	7.27377	0.309719	6.1117	0.438722	6.36584	0.243841	6.21377	0.226264	0.08	0.62	-0.21	0.23	0.32	0.64	0	1	0.25	0.74	0.1	0.9
AT1G04670		1	chr1	1301861	1302724	5.0496	0.210555	5.19382	0.235965	4.92057	0.185386	5.49375	0.318316	5.56596	0.242003	5.35695	0.197725	5.18954	0.112359	5.48541	0.195226	5.21939	0.187754	0.14	0.71	-0.13	0.71	0.07	0.95	-0.14	0.85	0.3	0.37	0.03	0.94
AT1G04680	Pectin lyase-like superfamily protein	0	chr1	1303529	1307884	6.74855	0.20962	6.75224	0.166424	6.91773	0.105215	7.13514	0.264012	6.98636	0.310445	7.71417	0.767239	6.64645	0.179566	6.89404	0.165883	7.15403	0.242198	0	0.99	0.17	0.53	-0.15	0.89	0.58	0.7	0.25	0.48	0.51	0.27
AT1G04684		0	chr1	1310430	1310579	6.07607	0.081335	5.96306	0.205531	5.90677	0.036392	6.40239	0.512329	6.38051	0.316549	6.2879	0.418424	6.14787	0.242681	6.38548	0.296224	6.10502	0.13193	-0.11	0.68	-0.17	0.18	-0.02	0.99	-0.11	0.93	0.24	0.68	-0.04	0.93
AT1G04690	potassium channel beta subunit 1	1	chr1	1313564	1315750	10.3016	0.0469405	10.2138	0.0369208	10.2575	0.0650321	10.4299	0.121039	10.5585	0.206797	10.5045	0.113687	10.2253	0.213337	10.3313	0.082255	10.3633	0.163191	-0.09	0.25	-0.04	0.64	0.13	0.84	0.07	0.81	0.11	0.76	0.14	0.73
AT1G04700	PB1 domain-containing protein tyrosine kinase	1	chr1	1316254	1320919	6.43398	0.169607	6.5979	0.123991	6.7389	0.080648	6.43436	0.225811	6.19894	0.115104	6.64254	0.284167	6.4959	0.10017	6.43543	0.164219	6.4799	0.197681	0.16	0.51	0.3	0.22	-0.24	0.68	0.21	0.76	-0.06	0.84	-0.02	0.97
AT1G04710	peroxisomal 3-ketoacyl-CoA thiolase 4	1	chr1	1321904	1324782	8.91893	0.0367051	8.80804	0.153201	8.83974	0.0641926	8.9261	0.165506	9.08375	0.126174	9.09076	0.0926749	9.05233	0.106255	9.24023	0.128085	9.21289	0.0527012	-0.11	0.55	-0.08	0.36	0.16	0.75	0.16	0.64	0.19	0.43	0.16	0.35
AT1G04730	P-loop containing nucleoside triphosphate hydrolases superfamily protein	0	chr1	1325296	1331086	7.52258	0.0843114	7.7019	0.0711797	7.61478	0.052445	7.21852	0.243301	7.44287	0.0585104	7.48899	0.284087	7.224	0.227215	7.37671	0.19991	7.47426	0.219742	0.18	0.22	0.09	0.42	0.22	0.69	0.27	0.7	0.15	0.74	0.25	0.58
AT1G04750	vesicle-associated membrane protein 721	0	chr1	1331466	1333567	9.85758	0.0722004	10.0491	0.0880099	10.0372	0.0551809	9.80854	0.12466	9.68532	0.111912	9.84695	0.0679816	9.83962	0.0983714	9.74537	0.12329	9.91417	0.128151	0.19	0.2	0.18	0.17	-0.12	0.76	0.04	0.89	-0.09	0.69	0.07	0.76
AT1G04760	vesicle-associated membrane protein 726	1	chr1	1334760	1336070	7.44233	0.110388	7.34107	0.147067	7.46137	0.126632	7.23057	0.179165	7.29647	0.163207	7.46897	0.166443	7.26421	0.121516	7.07611	0.201291	7.34524	0.212919	-0.1	0.65	0.02	0.94	0.07	0.92	0.24	0.59	-0.19	0.59	0.08	0.83
AT1G04770	Tetratricopeptide repeat (TPR)-like superfamily protein	0	chr1	1336371	1337849	10.9495	0.127735	10.9757	0.264611	10.7031	0.168977	11.3729	0.304837	11.184	0.35271	10.9136	0.0439572	11.3168	0.0401146	10.9475	0.142678	11.1654	0.283357	0.03	0.95	-0.25	0.33	-0.19	0.88	-0.46	0.43	-0.37	0.16	-0.15	0.72
AT1G04778		1	chr1	1339892	1340327	7.33799	0.147477	7.34042	0.0611834	6.87079	0.149322	8.18315	0.115707	8.09897	0.13392	8.1068	0.242528	7.84934	0.303987	7.88981	0.146739	8.08366	0.0650912	0	0.99	-0.47	0.15	-0.08	0.85	-0.08	0.88	0.04	0.95	0.23	0.6
AT1G04780	Ankyrin repeat family protein	0	chr1	1340669	1343584	11.2268	0.126496	11.4013	0.189107	11.3795	0.0914667	11.4096	0.0828673	11.4773	0.187284	11.5341	0.191026	11.3026	0.184679	11.1322	0.170052	11.2358	0.143163	0.17	0.52	0.15	0.4	0.07	0.9	0.12	0.75	-0.17	0.65	-0.07	0.86
AT1G04790	RING/U-box superfamily protein	1	chr1	1345036	1348451	10.8359	0.138649	10.6809	0.127395	10.9114	0.0679278	10.6223	0.0996828	10.7671	0.0278574	10.7815	0.0536944	10.7123	0.150845	10.7533	0.0992553	10.7224	0.0558296	-0.16	0.49	0.08	0.69	0.14	0.49	0.16	0.45	0.04	0.89	0.01	0.97
AT1G04800	glycine-rich protein	0	chr1	1348452	1349286	4.90758	0.306249	4.98195	0.163461	5.10422	0.0770518	5.21874	0.132542	5.17619	0.240266	5.17972	0.10591	5.39906	0.138505	5.10039	0.236145	5.14002	0.173344	0.07	0.88	0.2	0.59	-0.04	0.96	-0.04	0.91	-0.3	0.45	-0.26	0.41
AT1G04810	26S proteasome regulatory complex, non-ATPase subcomplex, Rpn2/Psmd1 subunit	1	chr1	1350180	1355442	12.516	0.0836015	12.2498	0.0608025	12.2719	0.0462744	12.7229	0.208619	12.2998	0.0751108	12.4645	0.0557411	13.1709	0.0441795	12.873	0.17053	12.849	0.0855901	-0.27	0.11	-0.24	0.13	-0.42	0.36	-0.26	0.51	-0.3	0.27	-0.32	0.09
AT1G04820	tubulin alpha-4 chain	0	chr1	1356191	1358386	11.8239	0.230772	11.8178	0.116353	12.0039	0.100527	11.7198	0.213752	11.3551	0.337822	11.6495	0.205229	11.2771	0.116488	11.3239	0.174174	11.7785	0.101335	-0.01	0.99	0.18	0.54	-0.36	0.68	-0.07	0.9	0.05	0.89	0.5	0.09
AT1G04830	Ypt/Rab-GAP domain of gyp1p superfamily protein	0	chr1	1358574	1362019	9.28783	0.193649	9.17937	0.1185	9.24509	0.00759727	9.21975	0.100095	9.4362	0.0761983	9.46102	0.0778664	9.31713	0.109241	9.40278	0.0454822	9.37985	0.138345	-0.11	0.7	-0.04	0.87	0.22	0.41	0.24	0.33	0.09	0.63	0.06	0.82
AT1G04840	Tetratricopeptide repeat (TPR)-like superfamily protein	0	chr1	1362867	1364962	5.76105	0.268256	5.8429	0.0874716	5.81614	0.102286	5.70605	0.13034	5.70549	0.246623	5.84551	0.182897	5.8001	0.187132	5.63148	0.21986	5.72976	0.181125	0.08	0.83	0.06	0.89	0	1	0.14	0.74	-0.17	0.7	-0.07	0.86
AT1G04850	ubiquitin-associated (UBA)/TS-N domain-containing protein	0	chr1	1365118	1368844	12.2914	0.125091	12.1411	0.116435	12.1817	0.0321756	12.1685	0.176684	12.1792	0.128015	12.1575	0.156741	12.1107	0.0724096	12.1532	0.190404	12.1083	0.0795587	-0.15	0.46	-0.11	0.46	0.01	0.99	-0.01	0.98	0.04	0.9	0	0.99
AT1G04860	ubiquitin-specific protease 2	0	chr1	1369054	1373101	7.41971	0.256629	7.32585	0.0723703	7.23517	0.0709094	7.77627	0.144939	7.4815	0.159816	7.57829	0.0705733	7.55999	0.106818	7.50904	0.137328	7.49685	0.0979301	-0.09	0.79	-0.18	0.55	-0.29	0.5	-0.2	0.5	-0.05	0.85	-0.06	0.77
AT1G04870	protein arginine methyltransferase 10	0	chr1	1373234	1375762	8.59857	0.13977	8.49058	0.118143	8.49395	0.182031	8.3627	0.394071	8.43031	0.319279	8.57194	0.234057	8.57409	0.128822	8.67689	0.228232	8.64084	0.223636	-0.11	0.62	-0.1	0.71	0.07	0.97	0.21	0.8	0.1	0.8	0.07	0.87
AT1G04880	HMG (high mobility group) box protein with ARID/BRIGHT DNA-binding domain	0	chr1	1375961	1379185	5.75881	0.139846	5.68476	0.162338	5.66931	0.18185	5.40064	0.299677	5.47779	0.216878	5.55226	0.201948	5.29912	0.354757	5.63995	0.23098	5.39862	0.239496	-0.07	0.79	-0.09	0.76	0.08	0.94	0.15	0.82	0.34	0.59	0.1	0.89
AT1G04890	Protein of unknown function, DUF593	0	chr1	1380382	1382599	4.59762	0.179571	4.50755	0.137533	4.25002	0.123946	4.22514	0.159658	4.39043	0.113833	5.04958	1.2789	4.26735	0.165108	4.45867	0.220462	4.46764	0.243132	-0.09	0.75	-0.35	0.22	0.17	0.71	0.82	0.73	0.19	0.65	0.2	0.64
AT_1_+_0_1383319-1383435		1	chr1	1383320	1383436	5.26026	0.213999	5.36635	0.0969204	5.21259	0.129566	5.53522	0.263784	5.53359	0.236128	5.42088	0.326284	5.40897	0.0941591	5.4767	0.152725	5.56997	0.219393	0.11	0.72	-0.05	0.89	0	1	-0.11	0.89	0.07	0.8	0.16	0.65
AT1G04900	Protein of unknown function (DUF185)	1	chr1	1383841	1387895	9.70998	0.115458	9.66177	0.106771	9.47714	0.0913062	9.72351	0.110234	9.58193	0.17457	9.53554	0.10468	9.76014	0.0820676	9.66926	0.0714024	9.46348	0.0873359	-0.05	0.82	-0.23	0.23	-0.14	0.78	-0.19	0.5	-0.09	0.57	-0.3	0.15
AT1G04910	O-fucosyltransferase family protein	0	chr1	1387871	1391187	10.748	0.169826	10.6962	0.0697001	10.7169	0.0708533	10.7013	0.133795	10.8051	0.083445	10.7872	0.0714466	10.543	0.0806301	10.7723	0.0477793	10.7768	0.139195	-0.05	0.83	-0.03	0.91	0.1	0.79	0.09	0.76	0.23	0.16	0.23	0.32
AT1G04920	sucrose phosphate synthase 3F	0	chr1	1391502	1395864	5.13421	0.0918722	5.11466	0.276019	5.20817	0.283594	5.46061	0.493923	5.23753	0.215192	5.25678	0.177948	5.29889	0.113154	5.33728	0.159253	5.13703	0.121636	-0.02	0.97	0.07	0.86	-0.22	0.87	-0.2	0.83	0.04	0.91	-0.16	0.49
AT1G04930	hydroxyproline-rich glycoprotein family protein	0	chr1	1396291	1399053	6.94808	0.193158	6.72143	0.0791797	6.9663	0.0750538	6.47435	0.462586	6.75258	0.28768	6.9977	0.146935	6.78464	0.159978	6.84667	0.0956983	7.07995	0.114108	-0.23	0.36	0.02	0.95	0.28	0.84	0.52	0.56	0.06	0.83	0.3	0.31
AT1G04945	HIT-type Zinc finger family protein	1	chr1	1399174	1403112	8.4767	0.176086	8.51856	0.0963537	8.33284	0.0689983	8.75224	0.147765	8.35117	0.268002	8.47917	0.0628708	8.72417	0.13704	8.6171	0.219421	8.67092	0.100949	0.04	0.88	-0.14	0.51	-0.4	0.52	-0.27	0.38	-0.11	0.79	-0.05	0.84
AT1G04940	translocon at the inner envelope membrane of chloroplasts 20	1	chr1	1399182	1400770	8.60439	0.153024	8.58056	0.125184	8.35631	0.0399168	8.81988	0.132516	8.79726	0.177108	8.87385	0.0545067	9.02301	0.142323	8.90279	0.105192	8.77702	0.1541	-0.02	0.94	-0.25	0.23	-0.02	0.97	0.05	0.84	-0.12	0.65	-0.25	0.41
AT1G04950	TATA BOX ASSOCIATED FACTOR II 59	0	chr1	1403085	1407501	10.826	0.113012	10.7851	0.130349	10.8889	0.046475	10.7813	0.0698913	10.8241	0.116426	10.8999	0.185324	10.8245	0.0475702	10.692	0.153929	10.7087	0.0922989	-0.04	0.86	0.06	0.67	0.04	0.9	0.12	0.75	-0.13	0.58	-0.12	0.43
AT1G04960	Protein of unknown function (DUF1664)	0	chr1	1407801	1410868	8.02713	0.108521	8.23003	0.168908	7.99737	0.0609694	8.17545	0.306846	8.00639	0.229392	8.1111	0.121111	8.39191	0.250838	8.25332	0.136151	8.20458	0.0342773	0.2	0.4	-0.03	0.86	-0.17	0.86	-0.06	0.92	-0.14	0.75	-0.19	0.61
AT1G04970	lipid-binding serum glycoprotein family protein	1	chr1	1411170	1413627	10.7444	0.235852	10.5898	0.131864	10.5578	0.0711637	10.8689	0.189665	11.2154	0.0976206	11.0965	0.0973567	11.0363	0.0652411	11.0025	0.228125	10.9396	0.135824	-0.15	0.63	-0.19	0.51	0.35	0.43	0.23	0.56	-0.03	0.93	-0.1	0.66
AT1G04980	PDI-like 2-2	0	chr1	1413644	1416144	6.4792	0.113561	6.60297	0.266316	6.29154	0.183693	7.07487	0.246934	6.75373	0.152222	7.06233	0.0842208	7.16556	0.0956021	7.58795	0.264095	7.34569	0.121519	0.12	0.73	-0.19	0.45	-0.32	0.6	-0.01	0.98	0.42	0.32	0.18	0.41
AT1G04985		0	chr1	1416343	1418482	9.93444	0.220733	9.64471	0.0912719	9.82197	0.0904432	9.39148	0.245315	9.65863	0.390307	9.70293	0.0476035	9.93474	0.245327	10.0598	0.146712	10.0266	0.167343	-0.29	0.32	-0.11	0.7	0.27	0.82	0.31	0.5	0.13	0.77	0.09	0.84
AT1G04990	Zinc finger C-x8-C-x5-C-x3-H type family protein	0	chr1	1419080	1421789	8.47221	0.0362051	8.62116	0.133443	8.37803	0.190184	8.86437	0.104741	8.72611	0.10754	8.67571	0.132188	9.2174	0.170431	9.10263	0.231444	9.14169	0.147672	0.15	0.37	-0.09	0.69	-0.14	0.68	-0.19	0.54	-0.11	0.79	-0.08	0.83
AT1G05000	Phosphotyrosine protein phosphatases superfamily protein	1	chr1	1425593	1428782	7.25467	0.295737	6.92834	0.139001	6.83713	0.148674	7.89491	0.273603	7.82069	0.259458	8.09345	0.726496	8.059	0.304306	8.03517	0.14567	8.30314	0.169181	-0.33	0.4	-0.42	0.3	-0.07	0.94	0.2	0.9	-0.02	0.97	0.24	0.63
AT1G05010	ethylene-forming enzyme	0	chr1	1431190	1432858	6.99792	0.167486	7.20495	0.0619202	6.88604	0.127743	7.09612	0.163597	7.27226	0.10763	7.12801	0.0737869	7.17219	0.162086	7.30141	0.164946	7.02508	0.131197	0.21	0.34	-0.11	0.66	0.18	0.69	0.03	0.93	0.13	0.71	-0.15	0.63
AT1G05020	ENTH/ANTH/VHS superfamily protein	0	chr1	1435254	1437667	6.18467	0.168918	6.06221	0.172338	6.3557	0.159172	5.95591	0.243008	5.88966	0.238162	6.35092	0.228437	6.2462	0.365495	6.20645	0.257959	6.34024	0.110128	-0.12	0.68	0.17	0.52	-0.07	0.95	0.4	0.51	-0.04	0.96	0.09	0.88
AT1G05030	Major facilitator superfamily protein	0	chr1	1438152	1441417	8.87412	0.111875	8.94392	0.0484148	8.76847	0.0390438	9.21411	0.0687956	9.11278	0.159732	9.27495	0.1918	9.39189	0.157084	9.27946	0.193167	9.29295	0.172654	0.07	0.63	-0.11	0.44	-0.1	0.82	0.06	0.88	-0.11	0.77	-0.1	0.78
CUFF.1985		0	chr1	1441860	1442812	5.37404	0.0181582	5.49507	0.102868	5.54256	0.105829	5.47561	0.29127	5.4778	0.25041	5.51036	0.267842	5.2473	0.37753	5.4928	0.0540316	5.59559	0.166986	0.12	0.34	0.17	0.23	0	1	0.03	0.97	0.25	0.67	0.35	0.56
CUFF.1987		0	chr1	1442989	1445558	6.1409	0.0943182	6.0957	0.124941	6.16802	0.154298	5.62929	0.119922	5.82012	0.283248	5.81708	0.186773	5.73684	0.159194	5.71258	0.188365	5.67571	0.134644	-0.05	0.83	0.03	0.92	0.19	0.81	0.19	0.65	-0.02	0.96	-0.06	0.85
AT1G05040		0	chr1	1447369	1448448	5.18565	0.287114	5.09655	0.0693924	5.27364	0.1716	5.18425	0.183335	5.26547	0.185247	5.23287	0.14243	5.24339	0.10286	5.26967	0.0901518	5.2636	0.143876	-0.09	0.82	0.09	0.84	0.08	0.91	0.05	0.92	0.03	0.91	0.02	0.95
AT1G05055	general transcription factor II H2	0	chr1	1448718	1450887	8.49652	0.0861756	8.4316	0.110882	8.32711	0.0563425	8.80228	0.177267	8.83441	0.178393	8.77981	0.103872	8.76929	0.09151	8.79765	0.166167	8.72455	0.122101	-0.06	0.71	-0.17	0.22	0.03	0.97	-0.02	0.96	0.03	0.93	-0.04	0.85
AT1G05060		0	chr1	1451030	1452872	9.82106	0.258549	9.75601	0.101134	9.87126	0.113159	9.96701	0.241867	9.94416	0.175168	10.3243	0.0773181	10.4811	0.160674	10.3947	0.237717	10.5543	0.199344	-0.07	0.87	0.05	0.9	-0.02	0.98	0.36	0.45	-0.09	0.85	0.07	0.86
AT1G05061		0	chr1	1453216	1454260	5.71212	0.091621	5.95136	0.0471355	5.90031	0.111064	6.00022	0.173234	5.80927	0.167357	5.80759	0.0993011	5.89668	0.196012	5.74296	0.1483	5.84472	0.0605671	0.24	0.13	0.19	0.29	-0.19	0.74	-0.19	0.6	-0.15	0.68	-0.05	0.87
AT1G05065	CLAVATA3/ESR-RELATED 20	0	chr1	1454969	1455220	6.83983	0.0899287	6.78979	0.0812464	6.58814	0.0739285	7.33011	0.171394	7.37096	0.0951674	7.37161	0.207863	7.64375	0.157081	7.58665	0.128695	7.46202	0.141845	-0.05	0.74	-0.25	0.16	0.04	0.94	0.04	0.94	-0.06	0.86	-0.18	0.55
AT1G05070	Protein of unknown function (DUF1068)	0	chr1	1457063	1458744	11.5784	0.199182	11.3469	0.0968519	11.4563	0.133201	11.1598	0.0948418	11.5268	0.15359	11.3167	0.0837164	10.773	0.144485	11.2043	0.07303	11.0171	0.0707409	-0.23	0.38	-0.12	0.67	0.37	0.33	0.16	0.5	0.43	0.15	0.24	0.31
AT1G05080	F-box/RNI-like/FBD-like domains-containing protein	1	chr1	1459091	1460579	5.90047	0.174103	5.7579	0.122556	5.86344	0.0609185	5.87301	0.0912038	5.93336	0.249799	5.76938	0.104966	5.86695	0.116985	5.89582	0.200622	5.79856	0.0596854	-0.14	0.57	-0.04	0.89	0.06	0.93	-0.1	0.69	0.03	0.94	-0.07	0.73
AT1G05085		1	chr1	1460988	1461670	6.73373	0.060003	6.75177	0.136832	6.5052	0.155426	6.42487	0.227171	6.45144	0.163156	6.54451	0.0893694	6.65653	0.259497	6.45394	0.209341	6.5111	0.274494	0.02	0.94	-0.23	0.27	0.03	0.98	0.12	0.79	-0.2	0.69	-0.15	0.8
AT_1_-_2_1462285-1462377		0	chr1	1462286	1462378	5.08509	0.204451	5.13757	0.357345	4.94127	0.073336	5.21599	0.238107	5.31395	0.092872	5.32602	0.0978773	5.43176	0.173607	5.49538	0.45395	5.12734	0.153184	0.05	0.93	-0.14	0.57	0.1	0.88	0.11	0.82	0.06	0.94	-0.3	0.36
AT1G05090	dentin sialophosphoprotein-related	1	chr1	1463202	1465622	10.673	0.146544	10.283	0.0781689	10.628	0.108616	10.1801	0.20885	10.5825	0.243384	10.5452	0.0923184	10.3047	0.142769	10.5826	0.087384	10.5321	0.126325	-0.39	0.13	-0.04	0.86	0.4	0.55	0.37	0.41	0.28	0.28	0.23	0.4
AT1G05100	mitogen-activated protein kinase kinase kinase 18	1	chr1	1469610	1470881	9.62806	1.09645	9.21756	1.12861	9.99597	1.39222	10.2746	0.580082	9.82635	0.766591	9.88685	0.687055	9.59244	0.235454	9.44828	0.349553	9.97757	0.423879	-0.41	0.85	0.37	0.88	-0.45	0.86	-0.39	0.81	-0.14	0.82	0.39	0.58
AT1G05120	Helicase protein with RING/U-box domain	0	chr1	1471406	1476078	11.0462	0.075789	11.1713	0.118198	11.0225	0.104173	11.1715	0.0587826	11.11	0.0551122	11.1468	0.0908676	11.259	0.112589	11.2023	0.132659	11.1832	0.114722	0.13	0.45	-0.02	0.9	-0.06	0.75	-0.02	0.91	-0.06	0.83	-0.08	0.75
AT1G05135		0	chr1	1477500	1478821	11.6955	0.146619	11.3631	0.113452	11.8628	0.120684	11.5415	0.170192	11.0683	0.384815	11.4977	0.276648	11.6121	0.200906	11.3489	0.233239	11.75	0.15675	-0.33	0.19	0.17	0.45	-0.47	0.59	-0.04	0.95	-0.26	0.56	0.14	0.72
AT1G05136		1	chr1	1478923	1479063	4.93733	0.121077	4.95219	0.383376	5.00088	0.183812	4.96765	0.179492	4.8822	0.148971	5.01966	0.285198	5.12308	0.131629	5.1162	0.320485	5.04958	0.41714	0.01	0.98	0.06	0.83	-0.09	0.89	0.05	0.94	-0.01	0.99	-0.07	0.92
AT1G05140	Peptidase M50 family protein	1	chr1	1482548	1484056	9.9442	0.231892	10.1696	0.0686437	9.94037	0.0999179	10.1385	0.13255	9.93367	0.176246	10.1281	0.131704	10.3788	0.147611	10.1854	0.105345	10.044	0.118276	0.23	0.43	0	0.99	-0.2	0.68	-0.01	0.98	-0.19	0.46	-0.33	0.26
AT1G05150	Calcium-binding tetratricopeptide family protein	0	chr1	1484067	1486960	9.55517	0.055399	9.60262	0.0826894	9.54688	0.0133083	9.68944	0.162894	9.53658	0.135642	9.58071	0.0991157	9.56556	0.0486382	9.41146	0.0769188	9.40033	0.134128	0.05	0.7	-0.01	0.92	-0.15	0.76	-0.11	0.76	-0.15	0.27	-0.17	0.41
AT1G05160	cytochrome P450, family 88, subfamily A, polypeptide 3	0	chr1	1487378	1490947	7.37541	0.0758902	7.17496	0.105284	7.05236	0.151057	7.50105	0.178297	7.58647	0.167647	7.51919	0.174671	7.25928	0.154555	7.58447	0.0823641	7.23984	0.217229	-0.2	0.23	-0.32	0.18	0.09	0.89	0.02	0.97	0.33	0.24	-0.02	0.97
AT1G05170	Galactosyltransferase family protein	0	chr1	1491111	1494248	6.90822	0.162404	7.00467	0.128619	6.92717	0.128519	6.98858	0.300546	6.9416	0.231979	6.95051	0.358053	7.26706	0.163802	7.05086	0.213919	7.02459	0.0762	0.1	0.71	0.02	0.95	-0.05	0.97	-0.04	0.97	-0.22	0.59	-0.24	0.35
AT1G05180	NAD(P)-binding Rossmann-fold superfamily protein	0	chr1	1498114	1501824	8.58775	0.0791036	8.70925	0.147322	8.5846	0.0636879	8.41321	0.303816	8.36158	0.175669	8.40841	0.342595	8.4616	0.221801	8.18645	0.180993	8.28976	0.0354579	0.12	0.54	0	0.98	-0.05	0.96	0	1	-0.28	0.51	-0.17	0.6
AT1G05190	Ribosomal protein L6 family	0	chr1	1502344	1503830	9.49689	0.128255	9.50798	0.167054	9.32216	0.182383	9.76719	0.128803	9.78023	0.172344	9.9058	0.18676	10.1816	0.183407	10.0906	0.168766	10.0212	0.132499	0.01	0.97	-0.17	0.5	0.01	0.98	0.14	0.75	-0.09	0.81	-0.16	0.63
AT1G05200	glutamate receptor 3.4	1	chr1	1504960	1509152	8.40672	0.167475	8.45126	0.150916	8.20634	0.111067	8.21288	0.165045	8.17804	0.074403	8.2059	0.0171163	7.68901	0.126933	7.61526	0.185329	7.66371	0.0647544	0.04	0.89	-0.2	0.39	-0.03	0.95	-0.01	0.99	-0.07	0.83	-0.03	0.92
AT1G05205		0	chr1	1509103	1510281	6.45627	0.104264	6.32614	0.0738864	6.49294	0.158664	6.11498	0.121114	6.092	0.130614	6.3747	0.127896	5.96839	0.387075	6.02915	0.291801	6.16365	0.129882	-0.13	0.39	0.04	0.89	-0.02	0.97	0.26	0.44	0.06	0.94	0.2	0.75
AT1G05210	Transmembrane protein 97, predicted	1	chr1	1510404	1511683	9.73198	0.192957	9.68254	0.117406	9.7719	0.0545573	9.47586	0.201001	9.42335	0.182007	9.46331	0.029909	9.33521	0.176632	9.45954	0.145654	9.44968	0.105975	-0.05	0.88	0.04	0.89	-0.05	0.95	-0.01	0.98	0.12	0.72	0.11	0.71
AT1G05220	Transmembrane protein 97, predicted	1	chr1	1511907	1513573	9.22438	0.114182	8.97253	0.11251	9.1173	0.107115	9.12298	0.0884911	9.06943	0.210566	9.27261	0.112849	9.17005	0.0634785	9.26514	0.0680355	9.19099	0.123762	-0.25	0.23	-0.11	0.56	-0.05	0.93	0.15	0.57	0.1	0.48	0.02	0.93
AT1G05230	homeodomain GLABROUS 2	0	chr1	1512896	1518805	5.7617	0.110112	5.72663	0.132788	5.91779	0.0404852	5.8338	0.274346	5.67187	0.186354	5.57079	0.0807351	5.65785	0.0921874	5.60027	0.166005	5.53765	0.0573633	-0.04	0.89	0.16	0.28	-0.16	0.85	-0.26	0.62	-0.06	0.85	-0.12	0.43
AT1G05240	Peroxidase superfamily protein	1	chr1	1521137	1522681	11.6208	0.37431	11.7162	0.264507	11.9735	0.0367234	11.8732	0.270441	11.3678	0.210665	11.7906	0.10319	11.5618	0.177791	11.1227	0.162677	11.4521	0.268613	0.1	0.88	0.35	0.42	-0.51	0.47	-0.08	0.88	-0.44	0.25	-0.11	0.83
CUFF.2089		0	chr1	1523764	1523982	6.04764	0.12177	6.08185	0.133085	5.97117	0.0625966	6.22044	0.147582	6.1999	0.109777	6.1398	0.114742	6.25637	0.205767	6.03146	0.0980786	6.18691	0.200353	0.03	0.89	-0.08	0.64	-0.02	0.97	-0.08	0.81	-0.22	0.5	-0.07	0.88
AT1G05250	Peroxidase superfamily protein	0	chr1	1525601	1527234	11.6964	0.382549	11.775	0.20585	12.0568	0.0504405	11.9969	0.292279	11.4955	0.143558	11.916	0.119133	11.716	0.116645	11.2395	0.147689	11.562	0.201189	0.08	0.9	0.36	0.42	-0.5	0.45	-0.08	0.9	-0.48	0.16	-0.15	0.65
AT1G05260	Peroxidase superfamily protein	1	chr1	1529767	1531439	14.5112	0.0541603	14.4533	0.0493043	14.5005	0.140303	14.2819	0.0788283	14.0701	0.0892673	14.1423	0.112693	13.8599	0.0574704	13.5245	0.164039	13.6086	0.187948	-0.06	0.5	-0.01	0.96	-0.21	0.39	-0.14	0.58	-0.34	0.23	-0.25	0.37
AT1G05270	TraB family protein	0	chr1	1531641	1534410	9.12779	0.108117	9.15648	0.167764	9.01403	0.106215	9.21991	0.206691	9.2705	0.133363	9.19438	0.154644	9.13379	0.226511	9.18965	0.127508	9.02245	0.0736644	0.03	0.92	-0.11	0.52	0.05	0.94	-0.03	0.96	0.06	0.9	-0.11	0.75
AT1G05280	Protein of unknown function (DUF604)	0	chr1	1535444	1537525	5.43316	0.112269	5.55001	0.168896	5.43336	0.189002	5.57589	0.345934	5.6356	0.0770212	5.91127	0.53402	5.4453	0.270899	5.53372	0.0535045	5.50016	0.101457	0.12	0.63	0	1	0.06	0.95	0.34	0.78	0.09	0.84	0.05	0.91
AT1G05290	CCT motif family protein	0	chr1	1539152	1540562	5.5123	0.171243	5.71236	0.0543026	5.78429	0.0599914	6.00681	0.250089	5.88998	0.140722	5.86801	0.158595	5.90762	0.0781115	5.91083	0.130414	5.97579	0.336357	0.2	0.35	0.27	0.24	-0.12	0.88	-0.14	0.8	0	0.99	0.07	0.9
AT1G05291	Protein of unknown function (DUF1218)	0	chr1	1541348	1542432	4.86748	0.12955	4.99642	0.340856	5.07674	0.25734	4.78504	0.224345	4.74683	0.121044	5.06368	0.530528	5.04327	0.247605	4.99084	0.377899	4.85139	0.139058	0.13	0.79	0.21	0.53	-0.04	0.96	0.28	0.79	-0.05	0.95	-0.19	0.64
AT1G05300	zinc transporter 5 precursor	0	chr1	1545106	1547849	12.0021	0.0810962	11.3421	0.147923	11.4593	0.186856	11.4846	0.387783	11.6698	0.14205	11.4579	0.192941	11.1165	0.219821	10.918	0.315205	11.0504	0.250932	-0.66	0.06	-0.54	0.12	0.19	0.86	-0.03	0.98	-0.2	0.73	-0.07	0.9
AT1G05310	Pectin lyase-like superfamily protein	0	chr1	1550543	1552517	8.40312	0.318433	8.78212	0.0626329	8.26078	0.0823685	8.4992	0.190794	8.18964	0.172307	8.16498	0.185022	8.4549	0.0629444	8.30015	0.0983725	7.9998	0.139965	0.38	0.33	-0.14	0.72	-0.31	0.57	-0.33	0.49	-0.15	0.37	-0.46	0.11
AT1G05320		1	chr1	1553603	1557733	11.9685	0.0342739	12.0139	0.0360195	12.069	0.0658296	12.2225	0.0650791	12.1727	0.151476	12.3299	0.106802	12.393	0.114281	12.1906	0.0601458	12.2393	0.133097	0.05	0.44	0.1	0.28	-0.05	0.91	0.11	0.64	-0.2	0.3	-0.15	0.54
AT1G05330		1	chr1	1558170	1558583	5.33458	0.195044	5.35427	0.286104	5.26892	0.282996	5.97588	0.854131	5.42822	0.0328795	5.61214	0.157985	5.51612	0.257031	5.43063	0.138636	5.56626	0.139145	0.02	0.97	-0.07	0.89	-0.55	0.8	-0.36	0.82	-0.09	0.85	0.05	0.92
AT1G05340		0	chr1	1558844	1559903	13.8894	0.360725	14.0971	0.277664	13.5877	0.255198	14.4643	0.365256	14.6598	0.36266	14.5098	0.0278142	14.9166	0.164554	14.9234	0.0755473	14.598	0.0957644	0.21	0.71	-0.3	0.56	0.2	0.88	0.05	0.96	0.01	0.98	-0.32	0.27
AT1G05350	NAD(P)-binding Rossmann-fold superfamily protein	0	chr1	1560678	1564123	11.0738	0.0572703	11.112	0.0857347	11.3105	0.0927533	10.944	0.123853	10.8429	0.140441	10.9243	0.178471	10.8545	0.187839	10.8758	0.125143	10.94	0.0710008	0.04	0.77	0.24	0.16	-0.1	0.84	-0.02	0.97	0.02	0.96	0.09	0.78
AT1G05360		1	chr1	1564598	1567465	9.09931	0.135706	8.94671	0.0639639	9.02385	0.0526003	9.31246	0.130309	9.21306	0.161885	9.30571	0.0805437	9.19745	0.171517	9.24242	0.173828	9.18038	0.207001	-0.15	0.39	-0.08	0.67	-0.1	0.85	-0.01	0.99	0.04	0.91	-0.02	0.97
AT1G05370	Sec14p-like phosphatidylinositol transfer family protein	0	chr1	1569192	1572280	5.74811	0.102947	5.64695	0.22273	5.61116	0.120293	5.79321	0.144873	5.61467	0.195024	5.84834	0.113956	5.78999	0.27978	5.63099	0.290625	5.66042	0.0633117	-0.1	0.74	-0.14	0.45	-0.18	0.76	0.06	0.88	-0.16	0.8	-0.13	0.76
AT1G05380	Acyl-CoA N-acyltransferase with RING/FYVE/PHD-type zinc finger protein	1	chr1	1576863	1582614	9.77601	0.123395	9.9204	0.069827	9.96117	0.114909	9.73836	0.171359	9.72057	0.0995716	9.78843	0.10185	9.73279	0.0702356	9.668	0.103083	9.71557	0.188212	0.14	0.39	0.19	0.35	-0.02	0.98	0.05	0.9	-0.06	0.73	-0.02	0.96
AT1G05385	photosystem II 11 kDa protein-related	0	chr1	1582671	1583718	8.42915	0.155078	8.44838	0.275944	8.25582	0.175629	8.51152	0.169547	8.55081	0.118215	8.51726	0.113518	8.74017	0.16687	8.75532	0.0847616	8.50559	0.144865	0.02	0.97	-0.17	0.52	0.04	0.95	0.01	0.99	0.02	0.96	-0.23	0.45
AT1G05390	pre-tRNA	0	chr1	1583772	1583845	6.80834	0.139575	6.88268	0.0888508	7.07474	0.135494	6.99061	0.168006	6.87224	0.107873	6.61049	0.22668	6.87456	0.233761	6.92037	0.120102	6.90196	0.166441	0.07	0.72	0.27	0.27	-0.12	0.82	-0.38	0.47	0.05	0.92	0.03	0.96
AT1G05400		1	chr1	1584073	1585421	7.73563	0.177931	7.58607	0.0715568	7.58668	0.121958	8.05118	0.0952102	7.90625	0.182954	8.11493	0.238243	8.15666	0.0534379	8.06735	0.0869216	8.04755	0.100519	-0.15	0.51	-0.15	0.55	-0.14	0.77	0.06	0.9	-0.09	0.55	-0.11	0.5
AT1G05410	Protein of unknown function (DUF1423)	0	chr1	1585371	1587778	6.88653	0.118533	7.14022	0.133763	6.87182	0.211664	6.64636	0.333631	6.7812	0.398	6.7942	0.219837	6.85533	0.0897704	6.8606	0.278505	6.71556	0.0520257	0.25	0.26	-0.01	0.97	0.13	0.92	0.15	0.84	0.01	0.99	-0.14	0.35
AT1G05420	ovate family protein 12	1	chr1	1590073	1590753	6.98838	0.226073	6.95889	0.139248	6.98008	0.0966395	6.9974	0.142605	7.35718	0.179155	7.44695	0.167865	6.33026	0.26468	6.8644	0.134577	6.76139	0.2081	-0.03	0.94	-0.01	0.98	0.36	0.44	0.45	0.3	0.53	0.25	0.43	0.37
AT1G05430		0	chr1	1594057	1595818	10.4803	0.127485	10.2618	0.0604181	10.2598	0.151363	10.3839	0.090307	10.5378	0.110241	10.4608	0.164992	10.252	0.156173	10.4392	0.0438283	10.3995	0.0933567	-0.22	0.23	-0.22	0.35	0.15	0.61	0.08	0.83	0.19	0.42	0.15	0.57
AT1G05440	C-8 sterol isomerases	0	chr1	1596007	1597848	5.99493	0.17192	5.93221	0.0842093	6.00967	0.112161	6.01116	0.177679	5.82904	0.236784	6.07799	0.0960767	5.58015	0.221334	5.74882	0.171964	5.80623	0.0694662	-0.06	0.8	0.01	0.96	-0.18	0.81	0.07	0.86	0.17	0.69	0.23	0.49
AT1G05450	Bifunctional inhibitor/lipid-transfer protein/seed storage 2S albumin superfamily protein	1	chr1	1599911	1601214	7.06338	0.304264	7.23695	0.167582	6.82634	0.24518	7.70096	0.217261	7.33633	0.377754	7.32419	0.14247	8.17	0.194525	8.54126	0.28656	8.18294	0.184705	0.17	0.68	-0.24	0.61	-0.36	0.72	-0.38	0.44	0.37	0.46	0.01	0.98
AT1G05460	P-loop containing nucleoside triphosphate hydrolases superfamily protein	0	chr1	1601148	1605027	7.88332	0.239409	7.93086	0.134266	8.00549	0.135137	7.89815	0.218436	7.82814	0.182538	8.14339	0.129416	7.95944	0.0593414	7.86473	0.105727	8.02782	0.351363	0.05	0.9	0.12	0.72	-0.07	0.93	0.25	0.6	-0.09	0.6	0.07	0.91
AT1G05470	DNAse I-like superfamily protein	0	chr1	1607357	1611703	8.45309	0.213421	8.56932	0.0837895	8.53081	0.137295	8.84728	0.0989663	8.4622	0.36908	8.76925	0.114288	8.65325	0.079368	8.45051	0.150866	8.59505	0.172288	0.12	0.68	0.08	0.81	-0.39	0.64	-0.08	0.78	-0.2	0.41	-0.06	0.84
AT_1_-_1_1614683-1614817		0	chr1	1614684	1614818	5.73374	0.153427	5.7422	0.158366	5.70294	0.10703	5.66561	0.25913	5.59694	0.275287	5.9366	0.157035	5.62644	0.0547292	5.70835	0.24386	5.91287	0.233484	0.01	0.98	-0.03	0.91	-0.07	0.95	0.27	0.63	0.08	0.83	0.29	0.4
AT1G05490	chromatin remodeling 31	0	chr1	1618602	1623452	6.14575	0.0409646	6.48739	0.117992	5.78164	0.0350397	5.8017	0.151445	6.24938	0.0846428	5.73156	0.289076	7.98659	0.188206	7.80044	0.299668	7.4272	0.168831	0.34	0.1	-0.36	0.03	0.45	0.25	-0.07	0.91	-0.19	0.73	-0.56	0.19
AT1G05500	Calcium-dependent lipid-binding (CaLB domain) family protein	1	chr1	1624955	1629224	10.5926	0.137912	10.7076	0.117146	10.7272	0.0465302	10.709	0.142351	10.7278	0.130346	10.82	0.0736319	10.6627	0.0811159	10.7049	0.232763	10.801	0.103669	0.11	0.59	0.13	0.43	0.02	0.97	0.11	0.71	0.04	0.92	0.14	0.46
AT1G05510	Protein of unknown function (DUF1264)	1	chr1	1629446	1630863	5.32115	0.357929	5.22205	0.0737468	5.19749	0.155949	5.27854	0.132204	4.96008	0.15346	5.081	0.409054	5.30698	0.429234	4.82097	0.159142	5.07618	0.121897	-0.1	0.84	-0.12	0.81	-0.32	0.44	-0.2	0.8	-0.49	0.46	-0.23	0.73
AT1G05520	Sec23/Sec24 protein transport family protein	0	chr1	1630900	1635711	10.7907	0.135007	10.6976	0.0909867	10.7824	0.113422	10.6415	0.270353	10.7646	0.107091	10.7385	0.0759578	10.3895	0.151829	10.5235	0.122931	10.468	0.226298	-0.09	0.64	-0.01	0.98	0.12	0.87	0.1	0.86	0.13	0.65	0.08	0.85
AT1G05530	UDP-glucosyl transferase 75B2	0	chr1	1636496	1637863	5.78319	0.0647487	5.67228	0.213005	5.80764	0.169391	5.67988	0.24764	5.67556	0.256556	5.72203	0.288298	5.40142	0.134512	5.53016	0.0798266	5.63746	0.0779494	-0.11	0.68	0.02	0.93	0	1	0.04	0.96	0.13	0.58	0.24	0.31
AT1G05540	Protein of unknown function (DUF295)	1	chr1	1639286	1640811	6.49149	0.124993	6.50605	0.110277	6.58584	0.126957	6.10679	0.276891	5.93462	0.0594138	5.75866	0.362147	5.86488	0.167899	6.10129	0.252592	5.92804	0.322007	0.01	0.96	0.09	0.66	-0.17	0.81	-0.35	0.68	0.24	0.6	0.06	0.92
AT1G05550	Protein of unknown function (DUF295)	0	chr1	1640959	1643917	5.57738	0.168517	5.59583	0.0866708	5.59187	0.0904033	5.49027	0.113237	5.55626	0.397231	5.44466	0.0737599	6.17822	0.928483	5.43556	0.0364781	5.55172	0.190531	0.02	0.95	0.01	0.96	0.07	0.96	-0.05	0.86	-0.74	0.59	-0.63	0.65
AT1G05560	UDP-glucosyltransferase 75B1	0	chr1	1645498	1647147	10.2457	0.985618	9.54839	0.978632	10.2016	0.915789	11.0479	0.718479	10.9695	0.441663	10.9454	0.321767	10.8116	0.307723	11.2775	0.204192	11.4295	0.323023	-0.7	0.68	-0.04	0.98	-0.08	0.98	-0.1	0.95	0.47	0.39	0.62	0.34
AT1G05562		1	chr1	1645875	1647162	6.77004	0.215629	6.78746	0.311078	7.04306	0.182293	6.95875	0.160757	6.70041	0.292603	7.12186	0.137191	6.60322	0.17503	6.71328	0.266921	7.02686	0.138066	0.02	0.98	0.27	0.41	-0.26	0.74	0.16	0.68	0.11	0.82	0.42	0.24
AT1G05570	callose synthase 1	0	chr1	1647706	1659437	8.64133	0.0730633	8.74541	0.10722	8.56408	0.0661468	8.78969	0.242071	8.91755	0.270979	9.01983	0.250558	9.17818	0.230074	8.95649	0.246532	8.8745	0.221501	0.1	0.5	-0.08	0.5	0.13	0.89	0.23	0.72	-0.22	0.66	-0.3	0.5
AT1G05575		0	chr1	1661691	1662187	9.84723	0.277807	9.91804	0.404986	10.047	0.531549	10.2104	0.26912	10.5016	0.633997	10.0833	0.307114	10.6999	0.190129	10.3658	0.139214	10.3196	0.209953	0.07	0.92	0.2	0.8	0.29	0.87	-0.13	0.87	-0.33	0.34	-0.38	0.35
AT1G05577	Domain of unknown function (DUF966)	0	chr1	1662370	1664398	5.77463	0.269776	5.89553	0.0607856	5.84191	0.0851788	5.94993	0.14863	5.96867	0.142779	6.27246	0.18084	5.59266	0.395266	5.79969	0.0599903	5.96022	0.10063	0.12	0.73	0.07	0.86	0.02	0.98	0.32	0.46	0.21	0.73	0.37	0.53
AT1G05580	cation/H+ exchanger 23	0	chr1	1665433	1668904	5.15402	0.128432	5.29211	0.0462571	5.11861	0.225299	4.86306	0.119532	5.11309	0.329497	5.09092	0.327255	5.0817	0.20396	5.35079	0.625513	4.99234	0.222382	0.14	0.4	-0.04	0.93	0.25	0.77	0.23	0.73	0.27	0.79	-0.09	0.85
AT1G05590	beta-hexosaminidase 2	1	chr1	1669350	1671876	9.15826	0.258068	9.45802	0.141204	9.5396	0.114128	9.21088	0.0490791	8.99567	0.123336	9.14503	0.156835	9.01458	0.0963252	9.00733	0.225557	9.25123	0.16718	0.3	0.39	0.38	0.28	-0.22	0.43	-0.07	0.83	-0.01	0.99	0.24	0.39
AT1G05600	Tetratricopeptide repeat (TPR)-like superfamily protein	1	chr1	1671936	1673856	8.29206	0.092436	8.30606	0.223515	8.25905	0.0410151	8.40977	0.0650726	8.35639	0.0728251	8.41678	0.137893	8.67266	0.162619	8.62148	0.113925	8.38635	0.0782064	0.01	0.97	-0.03	0.8	-0.05	0.83	0.01	0.98	-0.05	0.87	-0.29	0.29
AT1G05610	ADP-glucose pyrophosphorylase small subunit 2	0	chr1	1673861	1675934	7.21534	0.103194	7.20511	0.0798848	6.87142	0.0754063	7.74655	0.297467	7.78241	0.273914	7.66882	0.183311	7.76433	0.284902	7.91658	0.252205	7.62296	0.0997855	-0.01	0.96	-0.34	0.12	0.04	0.98	-0.08	0.91	0.15	0.79	-0.14	0.75
AT_1_+_1_1676708-1676806		1	chr1	1676709	1676807	4.96487	0.278515	5.00225	0.194484	5.12339	0.177597	5.58725	0.212934	5.36112	0.0807721	5.34113	0.228824	5.44639	0.131079	5.4097	0.274988	5.42471	0.167247	0.04	0.94	0.16	0.69	-0.23	0.64	-0.25	0.67	-0.04	0.95	-0.02	0.96
AT1G05615	Domain of unknown function (DUF313)	0	chr1	1677507	1678270	5.78861	0.114205	5.46299	0.237276	5.82615	0.100836	5.56682	0.229345	5.76429	0.328316	5.53629	0.344571	5.52146	0.220356	5.69796	0.186604	5.44976	0.162021	-0.33	0.31	0.04	0.86	0.2	0.85	-0.03	0.97	0.18	0.69	-0.07	0.87
AT1G05620	uridine-ribohydrolase 2	1	chr1	1679158	1681710	10.2549	0.0106874	9.96079	0.131258	10.2133	0.0768339	9.89285	0.26911	10.0183	0.318574	10.2208	0.17428	9.62778	0.105686	9.86477	0.183814	9.95277	0.140778	-0.29	0.14	-0.04	0.65	0.13	0.91	0.33	0.57	0.24	0.44	0.32	0.24
AT1G05630	Endonuclease/exonuclease/phosphatase family protein	1	chr1	1682318	1687363	8.9158	0.159627	8.79609	0.076347	9.05896	0.0621505	8.96765	0.257291	8.71594	0.234104	9.00866	0.149624	8.86473	0.165328	8.85171	0.236044	9.02817	0.232182	-0.12	0.57	0.14	0.47	-0.25	0.76	0.04	0.95	-0.01	0.98	0.16	0.7
AT1G05640	Ankyrin repeat family protein	0	chr1	1687436	1689501	7.40242	0.122056	7.3927	0.112399	7.51812	0.220713	7.40684	0.179686	7.39752	0.131583	7.48203	0.0630257	7.31561	0.130428	7.27739	0.144284	7.30501	0.0975254	-0.01	0.97	0.12	0.71	-0.01	0.99	0.08	0.83	-0.04	0.91	-0.01	0.97
AT1G05650	Pectin lyase-like superfamily protein	0	chr1	1690264	1692126	5.9127	0.295339	5.90509	0.0860938	6.32863	0.106271	6.35741	0.34745	6.50879	0.208987	6.82779	0.36155	5.80644	0.135989	5.96392	0.259242	6.12522	0.23654	-0.01	0.99	0.42	0.28	0.15	0.89	0.47	0.61	0.16	0.72	0.32	0.41
AT1G05660	Pectin lyase-like superfamily protein	0	chr1	1694286	1696058	6.75397	0.456939	7.12343	0.201667	7.55391	0.139212	7.38167	0.321724	7.34331	0.0847217	7.56236	0.40838	6.75259	0.1589	7.30884	0.237134	7.68037	0.136934	0.37	0.53	0.8	0.21	-0.04	0.97	0.18	0.85	0.56	0.23	0.93	0.05
AT1G05670	Pentatricopeptide repeat (PPR-like) superfamily protein	0	chr1	1697587	1701025	7.01969	0.12364	7.01179	0.0502929	7.08479	0.115597	7.10186	0.200352	7.00277	0.185709	7.09643	0.0780104	6.9701	0.129652	6.9184	0.0951923	7.06589	0.140571	-0.01	0.97	0.07	0.76	-0.1	0.89	-0.01	0.99	-0.05	0.84	0.1	0.74
AT1G05675	UDP-Glycosyltransferase superfamily protein	0	chr1	1701116	1702749	6.3522	0.279407	6.4316	0.485126	7.24008	0.603212	6.52761	0.357248	6.0607	0.587953	5.67949	0.291285	6.73668	0.30265	6.39705	0.407164	6.68488	0.091553	0.08	0.92	0.89	0.28	-0.47	0.79	-0.85	0.35	-0.34	0.66	-0.05	0.92
AT1G05680	Uridine diphosphate glycosyltransferase 74E2	0	chr1	1703092	1704691	11.511	0.689959	11.0126	0.629131	12.4299	0.370862	11.0064	0.356209	11.0197	0.186375	10.7781	0.343182	10.2327	0.157858	10.4581	0.290175	10.3949	0.337703	-0.5	0.66	0.92	0.33	0.01	0.99	-0.23	0.8	0.23	0.65	0.16	0.77
AT1G05690	BTB and TAZ domain protein 3	1	chr1	1707011	1709347	6.11609	0.330104	6.12053	0.164694	6.0927	0.0573856	6.09177	0.148966	5.93523	0.0339788	6.04915	0.107941	5.85877	0.44383	5.88276	0.267941	5.88124	0.232535	0	0.99	-0.02	0.96	-0.16	0.63	-0.04	0.91	0.02	0.98	0.02	0.98
AT1G05700	Leucine-rich repeat transmembrane protein kinase protein	1	chr1	1709796	1713245	9.01335	0.286219	8.76832	0.276282	8.6134	0.0962522	8.94991	0.175758	8.61697	0.198389	8.84066	0.211342	8.96302	0.0344296	8.46282	0.124284	8.5298	0.08462	-0.25	0.61	-0.4	0.28	-0.33	0.54	-0.11	0.83	-0.5	0.11	-0.43	0.04
AT_1_-_1_1713626-1713757		0	chr1	1713627	1713758	4.88933	0.220997	5.03358	0.252535	4.97349	0.051178	5.1249	0.12695	5.29698	0.085624	5.36584	0.114097	5.34958	0.162867	5.10848	0.201211	5.17295	0.109099	0.14	0.73	0.08	0.77	0.17	0.59	0.24	0.45	-0.24	0.52	-0.18	0.53
AT1G05710	basic helix-loop-helix (bHLH) DNA-binding superfamily protein	1	chr1	1714950	1717276	10.0229	0.172543	10.0424	0.107924	10.1143	0.124045	10.4612	0.111328	10.5544	0.153128	10.6181	0.124443	10.7552	0.18441	10.99	0.154696	11.0292	0.0875628	0.02	0.95	0.09	0.73	0.09	0.85	0.16	0.61	0.23	0.5	0.27	0.35
AT1G05720	selenoprotein family protein	0	chr1	1717447	1718909	12.3743	0.126837	12.1744	0.081876	12.1868	0.0817741	12.134	0.140348	12.27	0.157309	12.2727	0.149534	12.0194	0.134997	12.1244	0.0978344	12.1346	0.14748	-0.2	0.28	-0.19	0.31	0.14	0.8	0.14	0.72	0.11	0.68	0.12	0.7
AT1G05730	Eukaryotic protein of unknown function (DUF842)	1	chr1	1718555	1720303	7.85924	0.129587	7.72946	0.243679	7.70271	0.178894	7.61127	0.238958	7.71247	0.268657	7.62492	0.156244	7.71485	0.0798518	7.84613	0.217179	7.85078	0.0716957	-0.13	0.7	-0.16	0.54	0.1	0.92	0.01	0.98	0.13	0.71	0.14	0.38
AT1G05740	Eukaryotic protein of unknown function (DUF842)	1	chr1	1720674	1721309	5.64755	0.563042	5.50246	0.233896	5.62794	0.234738	5.60517	0.229826	5.65243	0.443929	5.40569	0.168774	5.40956	0.221178	5.38092	0.148846	5.36393	0.155433	-0.15	0.86	-0.02	0.98	0.05	0.98	-0.2	0.71	-0.03	0.95	-0.05	0.92
AT1G05750	Tetratricopeptide repeat (TPR)-like superfamily protein	1	chr1	1721509	1724734	4.94078	0.180217	5.03839	0.180372	4.95901	0.139277	5.06019	0.277555	5.1785	0.164465	5.10598	0.130077	5.05834	0.162565	5.2066	0.204174	5.15658	0.255004	0.1	0.76	0.02	0.96	0.12	0.89	0.05	0.94	0.15	0.71	0.1	0.83
AT1G05760	Mannose-binding lectin superfamily protein	0	chr1	1723734	1724486	10.7376	0.152655	10.8392	0.103827	10.46	0.133686	11.2635	0.0593135	11.1927	0.0714678	10.9491	0.191689	11.3925	0.0959654	11.4081	0.0805762	11.0541	0.117254	0.1	0.65	-0.28	0.27	-0.07	0.75	-0.31	0.41	0.02	0.94	-0.34	0.18
AT1G05770	Mannose-binding lectin superfamily protein	0	chr1	1725388	1726283	9.3246	0.247872	9.08938	0.145388	8.75474	0.128677	9.50265	0.0878512	9.61812	0.144227	9.13674	0.254451	9.62412	0.15092	9.7214	0.0700026	9.16561	0.124879	-0.24	0.49	-0.57	0.17	0.12	0.78	-0.37	0.46	0.1	0.7	-0.46	0.17
AT1G05780	Vacuolar ATPase assembly integral membrane protein VMA21-like domain	1	chr1	1726608	1728404	8.78621	0.0688888	8.51458	0.0838276	8.543	0.0802941	8.66044	0.190394	8.95612	0.208978	8.83994	0.135585	8.53897	0.117798	8.99409	0.0322192	8.78394	0.190079	-0.27	0.12	-0.24	0.15	0.3	0.62	0.18	0.68	0.46	0.11	0.24	0.44
AT1G05785	Got1/Sft2-like vescicle transport protein family	1	chr1	1730249	1732626	10.5171	0.182465	10.4702	0.0771857	10.4314	0.178672	10.6053	0.135724	10.7212	0.11675	10.5715	0.118933	10.5392	0.174218	10.6164	0.0979215	10.5863	0.128414	-0.05	0.86	-0.09	0.79	0.12	0.8	-0.03	0.93	0.08	0.8	0.05	0.89
AT1G05790	lipase class 3 family protein	1	chr1	1732871	1737489	9.7262	0.125468	9.43312	0.0393761	9.57829	0.022499	9.61583	0.161663	9.96292	0.225714	9.97325	0.125608	9.56241	0.104108	9.89868	0.253745	9.64772	0.0448629	-0.29	0.14	-0.15	0.33	0.35	0.55	0.36	0.37	0.34	0.4	0.09	0.6
AT1G05800	alpha/beta-Hydrolases superfamily protein	1	chr1	1741204	1742619	5.52608	0.134122	5.64292	0.0307294	5.4736	0.0889329	6.01802	0.589576	5.74452	0.401031	5.79144	0.231091	5.7333	0.223774	5.53765	0.351503	5.72238	0.178367	0.12	0.48	-0.05	0.8	-0.27	0.88	-0.23	0.85	-0.2	0.76	-0.01	0.98
AT1G05805	basic helix-loop-helix (bHLH) DNA-binding superfamily protein	1	chr1	1744773	1747693	11.1301	0.179563	10.8194	0.0758859	11.06	0.0994194	10.7103	0.0588279	10.8737	0.107197	10.8302	0.0244211	10.2786	0.137912	10.3131	0.0388917	10.2978	0.0407142	-0.31	0.22	-0.07	0.79	0.16	0.52	0.12	0.34	0.03	0.88	0.02	0.94
AT1G05810	RAB GTPase homolog A5E	1	chr1	1748314	1749460	11.3191	0.212043	11.1042	0.0883339	11.1761	0.084142	11.1715	0.159316	11.2099	0.0906826	11.1516	0.0412292	10.9696	0.195509	11.1348	0.0594116	11.0856	0.0975785	-0.21	0.43	-0.14	0.59	0.04	0.94	-0.02	0.96	0.17	0.58	0.12	0.72
AT1G05820	SIGNAL PEPTIDE PEPTIDASE-LIKE 5	1	chr1	1749682	1753990	5.98938	0.086483	5.77042	0.0558458	5.89793	0.114735	5.88799	0.33873	5.79251	0.176935	5.91321	0.27992	5.84379	0.325876	5.85024	0.316861	5.94471	0.288781	-0.22	0.15	-0.09	0.59	-0.1	0.93	0.03	0.98	0.01	0.99	0.1	0.89
AT1G05830	trithorax-like protein 2	1	chr1	1754244	1761817	9.95382	0.162911	9.89443	0.0530849	9.92635	0.0234131	9.88889	0.185743	9.76799	0.135854	9.88975	0.0846201	9.71515	0.0322283	9.64478	0.0841227	9.74772	0.207705	-0.06	0.79	-0.03	0.91	-0.12	0.84	0	1	-0.07	0.6	0.03	0.93
AT1G05835	PHD finger protein	1	chr1	1762224	1762814	9.75404	0.35855	9.80399	0.13763	9.83587	0.1593	8.58291	0.176593	9.65	0.369377	9.23599	0.10002	7.76971	0.287704	8.77654	0.302574	8.38006	0.123785	0.05	0.93	0.08	0.88	1.07	0.25	0.65	0.16	1.01	0.16	0.61	0.23
AT1G05840	Eukaryotic aspartyl protease family protein	0	chr1	1762734	1766281	11.7279	0.150965	11.479	0.0912902	11.6522	0.0244236	11.5538	0.0865294	11.918	0.037673	11.911	0.0967508	11.5426	0.229835	11.7356	0.177306	11.6969	0.0896621	-0.25	0.26	-0.08	0.68	0.36	0.12	0.36	0.2	0.19	0.66	0.15	0.67
AT1G05850	Chitinase family protein	0	chr1	1766503	1768695	15.8701	0.0736893	15.7881	0.0120746	16.0503	0.0675097	15.36	0.181875	15.5107	0.151064	15.6767	0.0578914	15.4407	0.254263	15.5535	0.0997831	15.7801	0.0406153	-0.08	0.36	0.18	0.19	0.15	0.8	0.32	0.39	0.11	0.79	0.34	0.36
AT1G05860		1	chr1	1769014	1771115	9.60014	0.0698879	9.39517	0.103141	9.53824	0.0382994	9.39392	0.152776	9.73229	0.123605	9.64549	0.162196	9.79631	0.0271677	9.85164	0.079243	9.71261	0.141937	-0.2	0.21	-0.06	0.5	0.34	0.41	0.25	0.54	0.06	0.66	-0.08	0.69
AT1G05870	Protein of unknown function (DUF1685)	0	chr1	1771457	1773293	10.2736	0.256985	10.172	0.162342	10.306	0.0662041	10.0938	0.205231	10.3398	0.0828234	10.1488	0.163682	9.78094	0.160784	10.0563	0.182919	10.0626	0.282146	-0.1	0.8	0.03	0.93	0.25	0.6	0.05	0.92	0.28	0.43	0.28	0.54
AT_1_+_1_1773752-1773904		1	chr1	1773753	1773905	5.49729	0.123316	5.80148	0.355735	5.76394	0.216344	5.59876	0.137627	5.98344	0.191522	5.73586	0.111569	5.88665	0.217274	5.62475	0.194959	5.65427	0.240964	0.3	0.5	0.27	0.36	0.38	0.43	0.14	0.67	-0.26	0.54	-0.23	0.62
AT1G05880	RING/U-box superfamily protein	1	chr1	1775643	1778553	6.31096	0.250625	6.20798	0.208608	6.14015	0.227879	6.05617	0.247188	6.22242	0.228469	5.92646	0.218323	6.37168	0.538296	5.64423	0.269954	5.88642	0.173537	-0.1	0.81	-0.17	0.68	0.17	0.85	-0.13	0.83	-0.73	0.4	-0.49	0.55
AT1G05890	RING/U-box superfamily protein	1	chr1	1779256	1784529	12.5394	0.0734008	12.3898	0.116882	12.4062	0.0715878	12.6665	0.190278	12.7972	0.0706531	12.797	0.0626952	12.7419	0.0984299	12.8938	0.123812	12.8273	0.127946	-0.15	0.36	-0.13	0.29	0.13	0.8	0.13	0.73	0.15	0.51	0.09	0.72
AT1G05894		1	chr1	1784803	1786292	5.63108	0.147029	5.65736	0.0885831	5.63561	0.116589	6.09355	0.299608	5.93353	0.203042	6.02027	0.196092	5.85917	0.165001	5.67754	0.126654	5.81288	0.277551	0.03	0.92	0	0.99	-0.16	0.86	-0.07	0.92	-0.18	0.55	-0.05	0.93
AT1G05900	endonuclease III 2	1	chr1	1786856	1789676	8.29278	0.157916	8.08808	0.202011	8.09216	0.0410215	8.42342	0.090942	8.4888	0.119385	8.44731	0.118166	8.403	0.087471	8.3739	0.167627	8.23349	0.123019	-0.2	0.5	-0.2	0.31	0.07	0.87	0.02	0.94	-0.03	0.93	-0.17	0.43
AT1G05910	cell division cycle protein 48-related / CDC48-related	1	chr1	1790224	1796647	9.28442	0.191134	9.49877	0.0297368	9.50483	0.138418	9.51084	0.0189239	9.2727	0.172733	9.57435	0.156066	9.56826	0.145206	9.23779	0.202387	9.56221	0.14254	0.21	0.35	0.22	0.42	-0.24	0.5	0.06	0.83	-0.33	0.36	-0.01	0.99
AT1G05920	Domain of unknown function (DUF313)	1	chr1	1796778	1798254	5.24047	0.15591	5.23215	0.238589	5.29371	0.201784	5.07063	0.232156	4.98973	0.271227	4.98835	0.189344	4.88599	0.154709	4.9971	0.4828	5.15481	0.212848	-0.01	0.99	0.05	0.88	-0.08	0.93	-0.08	0.89	0.11	0.89	0.27	0.47
AT1G05925		0	chr1	1798901	1799062	4.97147	0.28104	5.13762	0.117731	4.82673	0.31721	5.09927	0.210113	5.17766	0.198047	5.15056	0.147197	5.13854	0.279836	5.25312	0.358535	4.98346	0.140299	0.17	0.65	-0.14	0.79	0.08	0.92	0.05	0.92	0.11	0.87	-0.16	0.74
AT1G05930	Domain of unknown function (DUF313)	1	chr1	1799418	1800933	6.33546	0.084779	6.163	0.119701	6.21416	0.086429	6.04419	0.612283	5.7225	0.230217	5.81858	0.5563	5.65059	0.416624	6.27036	0.856321	5.95084	0.161701	-0.17	0.33	-0.12	0.39	-0.32	0.85	-0.23	0.89	0.62	0.67	0.3	0.65
AT1G05940	cationic amino acid transporter 9	0	chr1	1801162	1803984	10.8136	0.109357	10.7656	0.121401	10.9434	0.0480259	10.673	0.128029	10.714	0.174805	10.9003	0.193675	10.9651	0.105507	10.8788	0.102162	10.9953	0.0355521	-0.05	0.83	0.13	0.36	0.04	0.95	0.23	0.59	-0.09	0.7	0.03	0.86
AT1G05950		0	chr1	1804401	1807471	6.96529	0.108739	7.08468	0.202368	6.77409	0.0136024	7.0739	0.223446	7.26913	0.323916	7.23659	0.151224	7.30829	0.0661363	8.09177	0.843621	7.61094	0.298236	0.12	0.67	-0.19	0.2	0.2	0.85	0.16	0.75	0.78	0.53	0.3	0.48
AT1G05960	ARM repeat superfamily protein	0	chr1	1807973	1815474	8.00154	0.183706	8.38057	0.0930047	7.72711	0.240339	8.04393	0.370398	7.45906	0.202757	7.66266	0.244559	7.81865	0.0527565	7.30337	0.301579	7.54829	0.148285	0.38	0.18	-0.27	0.43	-0.58	0.5	-0.38	0.64	-0.52	0.27	-0.27	0.27
AT1G05970	RNA-binding (RRM/RBD/RNP motifs) family protein	0	chr1	1816056	1817282	9.66227	0.0866223	9.57247	0.0978336	9.49768	0.149761	9.27669	0.179729	9.43414	0.307159	9.37127	0.206344	9.5618	0.0892454	9.53054	0.199762	9.5229	0.0652064	-0.09	0.56	-0.16	0.41	0.16	0.86	0.09	0.86	-0.03	0.93	-0.04	0.82
AT1G05990	EF hand calcium-binding protein family	1	chr1	1818447	1819040	5.90029	0.371488	6.13763	0.137782	6.34344	0.235481	6.40979	0.46809	5.90817	0.125747	6.26313	0.234368	6.43346	0.185993	6.63095	0.301599	6.55975	0.248357	0.24	0.62	0.44	0.39	-0.5	0.63	-0.15	0.89	0.2	0.71	0.13	0.79
AT1G06000	UDP-Glycosyltransferase superfamily protein	0	chr1	1820308	1821894	9.50099	0.207231	9.78796	0.0826709	9.38066	0.0427268	9.97463	0.252725	9.57061	0.237901	9.36004	0.154932	9.96549	0.276919	9.75003	0.0890191	9.81077	0.0607376	0.29	0.29	-0.12	0.63	-0.4	0.58	-0.61	0.3	-0.22	0.62	-0.15	0.71
AT1G06002		1	chr1	1820977	1821918	7.48062	0.0820882	7.57701	0.0721707	7.331	0.111343	7.46332	0.137443	7.25128	0.0892819	7.22932	0.239965	7.05378	0.169379	6.99245	0.191431	6.83928	0.151575	0.1	0.46	-0.15	0.36	-0.21	0.53	-0.23	0.65	-0.06	0.88	-0.21	0.51
AT1G06010		1	chr1	1822618	1823997	6.21375	0.215267	6.29107	0.181151	6.21719	0.107062	6.37482	0.34439	6.37928	0.37036	6.56555	0.271445	6.40119	0.166011	6.52465	0.0948107	6.29823	0.400427	0.08	0.84	0	0.99	0	1	0.19	0.81	0.12	0.67	-0.1	0.88
AT1G06020	pfkB-like carbohydrate kinase family protein	1	chr1	1824548	1826101	6.11841	0.201481	6.02206	0.103149	5.91069	0.116455	5.95672	0.107354	6.02654	0.257081	5.83532	0.383605	6.15222	0.159185	6.08293	0.141447	5.81673	0.070212	-0.1	0.73	-0.21	0.44	0.07	0.93	-0.12	0.87	-0.07	0.83	-0.34	0.23
AT1G06030	pfkB-like carbohydrate kinase family protein	1	chr1	1826880	1828161	5.26729	0.099914	5.36229	0.0324251	5.34111	0.172715	5.30088	0.170298	5.24452	0.293695	5.41611	0.2336	5.19622	0.0918375	5.32587	0.345061	5.28572	0.109876	0.09	0.45	0.07	0.77	-0.06	0.95	0.12	0.83	0.13	0.81	0.09	0.67
AT1G06040	B-box zinc finger family protein	0	chr1	1828413	1829890	14.2491	0.269451	14.2277	0.149473	14.4014	0.133075	13.5413	0.426008	13.4551	0.311822	13.6957	0.213323	13.1532	0.0294781	13.1544	0.315704	13.3735	0.255721	-0.02	0.96	0.15	0.67	-0.09	0.95	0.15	0.87	0	1	0.22	0.55
AT1G06050	Protein of unknown function (DUF1336)	0	chr1	1830605	1832555	9.91812	0.173153	10.0202	0.107522	9.90274	0.0912533	9.98938	0.107594	10.0598	0.17264	10.1047	0.110544	9.79974	0.115052	9.85998	0.0171187	9.69139	0.201722	0.1	0.68	-0.02	0.96	0.07	0.89	0.12	0.69	0.06	0.73	-0.11	0.75
AT1G06060	LisH and RanBPM domains containing protein	1	chr1	1832943	1834861	11.0567	0.0415157	11.0082	0.0496413	11.0715	0.0618825	10.8819	0.078152	11.0119	0.107821	11.0829	0.159472	10.6669	0.0677379	10.9131	0.0442771	10.8783	0.0988066	-0.05	0.53	0.01	0.89	0.13	0.65	0.2	0.53	0.25	0.13	0.21	0.26
AT1G06070	Basic-leucine zipper (bZIP) transcription factor family protein	0	chr1	1834829	1837648	11.2756	0.0514383	11.2005	0.0528192	11.3207	0.118662	11.6772	0.105735	11.7574	0.0220634	11.7336	0.085093	12.8063	0.0801771	12.7284	0.164901	12.6968	0.150828	-0.08	0.39	0.05	0.78	0.08	0.76	0.06	0.82	-0.08	0.78	-0.11	0.66
AT1G06080	delta 9 desaturase 1	1	chr1	1843568	1846302	8.85256	0.199035	9.28419	0.089234	9.1662	0.102029	8.8754	0.0965395	8.73416	0.19402	8.98692	0.0831312	9.10942	0.117269	9.29254	0.0941667	9.30405	0.106071	0.43	0.16	0.31	0.26	-0.14	0.8	0.11	0.63	0.18	0.4	0.19	0.39
AT1G06090	Fatty acid desaturase family protein	1	chr1	1847883	1849693	11.023	0.253131	10.8654	0.132914	10.7932	0.0399329	10.9097	0.191	11.2531	0.239651	11.057	0.191799	10.6764	0.396368	11.4778	0.35787	11.0889	0.153072	-0.16	0.65	-0.23	0.44	0.34	0.59	0.15	0.77	0.8	0.32	0.41	0.49
AT1G06100	Fatty acid desaturase family protein	1	chr1	1851530	1853019	8.40644	0.158767	8.10652	0.081733	8.1599	0.248799	7.48646	0.153049	7.8528	0.225383	7.68228	0.0642177	7.35605	0.278459	7.94836	0.362558	7.71107	0.242387	-0.3	0.2	-0.25	0.47	0.37	0.51	0.2	0.51	0.59	0.38	0.36	0.5
AT1G06110	SKP1/ASK-interacting protein 16	0	chr1	1853077	1855031	10.7037	0.0635793	10.6601	0.0779817	10.6104	0.0876266	10.7609	0.128806	10.8379	0.103388	10.8768	0.105328	10.6979	0.129623	10.8903	0.0944195	10.7414	0.116356	-0.04	0.73	-0.09	0.46	0.08	0.86	0.12	0.71	0.19	0.41	0.04	0.88
AT1G06120	Fatty acid desaturase family protein	1	chr1	1855943	1857718	9.9023	0.292804	9.7073	0.15924	9.59002	0.0994538	8.99848	0.238441	9.29094	0.183042	9.14429	0.21497	8.56247	0.366935	8.78746	0.275018	8.79787	0.175505	-0.19	0.63	-0.31	0.39	0.29	0.65	0.15	0.8	0.22	0.75	0.24	0.7
AT1G06130	glyoxalase 2-4	0	chr1	1857767	1860730	8.53523	0.0611904	8.60142	0.0918503	8.62279	0.0511454	8.72702	0.0677893	8.77231	0.0442762	8.84176	0.071466	9.76484	0.0535405	9.55143	0.0462387	9.57221	0.102601	0.07	0.62	0.09	0.35	0.05	0.83	0.11	0.52	-0.21	0.13	-0.19	0.28
AT1G06135		1	chr1	1862197	1862742	5.38746	0.0934133	5.28864	0.150813	5.51524	0.241141	4.74178	0.119571	5.34771	0.285586	4.77231	0.189277	4.91189	0.231276	4.99655	0.437307	4.75946	0.235311	-0.1	0.65	0.13	0.68	0.61	0.34	0.03	0.95	0.08	0.92	-0.15	0.76
AT1G06137		0	chr1	1863544	1863750	5.0321	0.0864176	4.9274	0.12516	4.98125	0.0321915	5.11918	0.404325	4.89366	0.185526	5.07045	0.188542	5.0378	0.242064	4.96275	0.175925	4.97425	0.269389	-0.1	0.56	-0.05	0.64	-0.23	0.84	-0.05	0.96	-0.08	0.88	-0.06	0.92
AT1G06140	Pentatricopeptide repeat (PPR) superfamily protein	1	chr1	1864796	1866472	6.38066	0.07534	6.59097	0.102358	6.59382	0.161825	6.36228	0.248578	6.20784	0.189018	6.53655	0.199364	6.36056	0.271113	6.24258	0.191692	6.32062	0.0653654	0.21	0.21	0.21	0.32	-0.15	0.85	0.17	0.77	-0.12	0.82	-0.04	0.94
AT1G06150	basic helix-loop-helix (bHLH) DNA-binding superfamily protein	0	chr1	1867015	1873718	8.77105	0.200045	8.62349	0.153186	8.82633	0.0400306	8.51445	0.250121	8.56824	0.290838	8.47823	0.198357	8.33235	0.138679	8.13068	0.153656	8.41808	0.0873761	-0.15	0.63	0.06	0.84	0.05	0.96	-0.04	0.96	-0.2	0.5	0.09	0.73
AT1G06149	conserved peptide upstream open reading frame 8	0	chr1	1868989	1873718	9.79706	0.0894542	9.66009	0.118793	9.77721	0.0322614	9.80812	0.0793221	9.65354	0.135025	9.65814	0.0773977	9.40441	0.0926874	9.31938	0.107442	9.44866	0.0795044	-0.14	0.44	-0.02	0.88	-0.15	0.65	-0.15	0.46	-0.09	0.69	0.04	0.81
AT1G06148		0	chr1	1874885	1877528	5.24199	0.184013	5.35989	0.249918	5.30808	0.157698	5.51411	0.136914	5.3409	0.0975636	5.63017	0.19763	5.3715	0.117515	5.36268	0.260138	5.5048	0.12667	0.12	0.77	0.07	0.84	-0.17	0.63	0.12	0.8	-0.01	0.99	0.13	0.59
AT_1_+_0_1881181-1881417		1	chr1	1881182	1881418	6.04315	0.0368569	6.03401	0.108683	5.71016	0.205946	6.65245	0.648088	6.37554	0.453977	6.38819	0.484981	6.68106	0.821005	6.20522	0.448018	6.4056	0.486486	-0.01	0.96	-0.33	0.22	-0.28	0.89	-0.26	0.86	-0.48	0.74	-0.28	0.85
AT1G06160	octadecanoid-responsive Arabidopsis AP2/ERF 59	1	chr1	1883004	1883934	9.20318	0.347151	8.84019	0.139115	9.37527	0.242173	9.34768	0.543595	9.26295	0.186487	9.28558	0.280537	9.62685	0.140581	8.94537	0.174961	9.31282	0.188077	-0.36	0.41	0.17	0.74	-0.08	0.96	-0.06	0.96	-0.68	0.13	-0.31	0.35
AT1G06170	basic helix-loop-helix (bHLH) DNA-binding superfamily protein	0	chr1	1884981	1886897	5.95124	0.245744	5.77504	0.0920321	5.91259	0.170739	5.75772	0.201831	5.48713	0.103963	6.01236	0.187937	5.99241	0.387505	5.60322	0.202863	6.20462	0.164751	-0.18	0.57	-0.04	0.93	-0.27	0.57	0.25	0.62	-0.39	0.54	0.21	0.74
AT1G06180	myb domain protein 13	1	chr1	1889408	1891158	9.7255	0.170447	9.41312	0.239317	9.68762	0.210234	9.61138	0.106909	9.89807	0.127556	9.74167	0.258918	9.11306	0.150838	9.46786	0.172721	9.38147	0.0963462	-0.31	0.37	-0.04	0.92	0.29	0.41	0.13	0.8	0.35	0.31	0.27	0.31
AT1G06190	Rho termination factor	0	chr1	1892273	1894148	9.15505	0.0542011	8.99015	0.0921737	9.01781	0.125455	8.76542	0.183649	8.94348	0.125515	8.9966	0.0735981	8.97325	0.139613	9.08881	0.131309	9.1198	0.0653243	-0.16	0.23	-0.14	0.39	0.18	0.74	0.23	0.52	0.12	0.69	0.15	0.5
AT1G06200	Peptidase S24/S26A/S26B/S26C family protein	0	chr1	1894336	1896935	10.342	0.0863979	10.3172	0.0791062	10.2415	0.0926504	10.538	0.0772656	10.5298	0.10773	10.5426	0.114536	10.6437	0.122307	10.7401	0.106182	10.6484	0.0787289	-0.02	0.88	-0.1	0.49	-0.01	0.98	0	0.99	0.1	0.69	0	0.99
AT1G06210	ENTH/VHS/GAT family protein	1	chr1	1897203	1899208	9.44049	0.170666	9.39072	0.118853	9.44696	0.160912	9.54317	0.165664	9.58685	0.0930648	9.56934	0.0563285	9.57051	0.134751	9.73555	0.146075	9.65625	0.0537898	-0.05	0.86	0.01	0.99	0.04	0.93	0.03	0.94	0.17	0.57	0.09	0.69
AT1G06220	Ribosomal protein S5/Elongation factor G/III/V family protein	1	chr1	1899964	1904873	9.81521	0.138655	10.0695	0.0808003	9.97514	0.027865	10.1136	0.237095	9.92773	0.240593	10.0453	0.0360691	10.125	0.091135	10.0047	0.0645033	10.1095	0.124782	0.25	0.22	0.16	0.34	-0.19	0.83	-0.07	0.88	-0.12	0.45	-0.02	0.96
AT1G06225	CLAVATA3/ESR-RELATED 3	1	chr1	1905975	1906226	8.73621	0.717389	8.7507	0.362919	7.91549	0.306492	8.13427	0.372687	8.66747	0.700209	8.02927	0.0549765	7.82178	0.367241	7.77148	0.243165	7.17562	0.370991	0.01	0.99	-0.82	0.37	0.53	0.79	-0.1	0.89	-0.05	0.95	-0.65	0.38
AT1G06230	global transcription factor group E4	1	chr1	1906963	1910848	12.5683	0.193509	12.5544	0.0512099	12.5817	0.115324	12.5701	0.214528	12.5164	0.0648421	12.6683	0.0784361	12.6354	0.177596	12.2989	0.207206	12.4514	0.266909	-0.01	0.96	0.01	0.97	-0.05	0.93	0.1	0.82	-0.34	0.4	-0.18	0.7
AT1G06240	Protein of unknown function DUF455	1	chr1	1911122	1913205	8.82813	0.0618013	8.81101	0.181717	9.03559	0.099184	8.61954	0.322335	8.8095	0.195209	8.87478	0.068335	8.366	0.144967	8.6649	0.177467	8.63793	0.175342	-0.02	0.95	0.21	0.2	0.19	0.85	0.26	0.67	0.3	0.37	0.27	0.4
AT1G06250	alpha/beta-Hydrolases superfamily protein	0	chr1	1913256	1914895	6.12345	0.11298	6.54476	0.188841	6.58643	0.295012	6.15512	0.150955	6.23351	0.104987	5.90357	0.128118	5.95601	0.292449	6.15075	0.0407297	6.18498	0.133936	0.42	0.17	0.46	0.25	0.08	0.87	-0.25	0.49	0.19	0.66	0.23	0.63
AT1G06265	other RNA	0	chr1	1914943	1917661	6.45527	0.126964	6.47835	0.13099	6.48935	0.0689243	6.51665	0.114304	6.44122	0.0691485	6.60514	0.180806	6.58278	0.289165	6.56719	0.235959	6.81447	0.125365	0.02	0.93	0.03	0.86	-0.08	0.83	0.09	0.82	-0.02	0.98	0.23	0.61
AT1G06260	Cysteine proteinases superfamily protein	1	chr1	1916430	1917585	5.91341	0.145471	5.92482	0.18273	6.00258	0.203477	5.69926	0.314064	5.79322	0.137627	5.75962	0.186148	5.84005	0.263269	5.98517	0.214552	5.88652	0.255822	0.01	0.98	0.09	0.78	0.09	0.92	0.06	0.94	0.15	0.78	0.05	0.94
AT1G06270	Pentatricopeptide repeat (PPR) superfamily protein	0	chr1	1918088	1919760	7.37253	0.0642666	7.42387	0.177501	7.48463	0.10823	7.72262	0.226176	7.55219	0.353575	7.71696	0.126014	7.71427	0.10402	7.56435	0.192201	7.80515	0.2298	0.05	0.84	0.11	0.44	-0.17	0.88	-0.01	0.99	-0.15	0.65	0.09	0.81
AT1G06280	LOB domain-containing protein 2	0	chr1	1920307	1920949	6.92648	0.0322646	6.959	0.226753	7.16669	0.242167	7.30949	0.523736	7.1958	0.435445	6.88746	0.301031	7.1865	0.0930837	7.34881	0.120989	7.18833	0.134397	0.03	0.92	0.24	0.4	-0.11	0.95	-0.42	0.71	0.16	0.46	0	1
AT1G06290	acyl-CoA oxidase 3	1	chr1	1922352	1926278	11.5163	0.194316	11.3958	0.205546	11.6498	0.126834	11.1943	0.234943	11.4675	0.0949053	11.3856	0.116337	11.2314	0.174523	11.4623	0.108174	11.3332	0.073577	-0.12	0.73	0.13	0.63	0.27	0.61	0.19	0.7	0.23	0.44	0.1	0.72
AT1G06310	acyl-CoA oxidase 6	1	chr1	1926791	1930258	6.67206	0.131979	6.56682	0.100797	6.63669	0.106029	6.42318	0.228637	6.64881	0.190797	6.77913	0.172135	6.32201	0.0834168	6.54699	0.272882	6.56683	0.266207	-0.11	0.59	-0.04	0.88	0.23	0.75	0.36	0.5	0.22	0.59	0.24	0.54
AT1G06320		1	chr1	1930523	1931449	7.6346	0.0885184	7.36108	0.100827	7.67519	0.112557	6.94448	0.426397	7.66055	0.244078	7.6396	0.14163	7.20441	0.27892	7.93163	0.130742	7.81861	0.199554	-0.27	0.16	0.04	0.83	0.72	0.48	0.7	0.42	0.73	0.17	0.61	0.25
AT1G06330	Heavy metal transport/detoxification superfamily protein	0	chr1	1931671	1932266	8.61969	0.135277	8.22036	0.147318	8.38981	0.225548	7.76973	0.120914	8.05685	0.32483	7.88659	0.101201	9.10454	0.309604	9.57626	0.172271	9.4862	0.165357	-0.4	0.16	-0.23	0.45	0.29	0.72	0.12	0.69	0.47	0.36	0.38	0.44
AT1G06340	Plant Tudor-like protein	0	chr1	1933284	1934014	5.2651	0.246483	5.034	0.11995	4.98291	0.248495	4.94907	0.164396	4.83472	0.057171	4.80828	0.345782	4.97621	0.152896	4.90262	0.381041	4.80113	0.366402	-0.23	0.48	-0.28	0.49	-0.11	0.79	-0.14	0.84	-0.07	0.92	-0.18	0.77
AT1G06350	Fatty acid desaturase family protein	0	chr1	1935293	1936819	6.49482	0.270945	6.79395	0.130862	6.72885	0.131153	6.95471	0.31418	6.68306	0.487308	6.83993	0.130491	6.90881	0.165391	6.92875	0.348214	7.15892	0.101475	0.3	0.4	0.23	0.5	-0.27	0.86	-0.11	0.86	0.02	0.98	0.25	0.37
AT1G06360	Fatty acid desaturase family protein	0	chr1	1938963	1940459	5.29998	0.220452	5.40503	0.201359	5.49025	0.0968167	5.35817	0.183694	5.49333	0.113072	5.55938	0.113797	5.58751	0.324979	5.36353	0.158569	5.34808	0.120884	0.11	0.79	0.19	0.5	0.14	0.8	0.2	0.61	-0.22	0.68	-0.24	0.64
AT1G06370		0	chr1	1942843	1944934	6.58527	0.110532	6.24658	0.110058	6.4252	0.0295764	6.60669	0.236809	6.60226	0.275538	6.73996	0.276072	6.32916	0.361483	6.62924	0.0933521	6.55084	0.337948	-0.34	0.14	-0.16	0.26	0	1	0.13	0.84	0.3	0.59	0.22	0.76
AT1G06380	Ribosomal protein L1p/L10e family	1	chr1	1945124	1946076	8.11151	0.133162	8.28475	0.127031	7.92051	0.348248	8.09458	0.0611917	7.73339	0.251089	7.84176	0.225144	8.10365	0.138446	7.87182	0.222025	7.97875	0.116428	0.17	0.43	-0.19	0.67	-0.36	0.49	-0.25	0.55	-0.23	0.54	-0.12	0.64
AT1G06390	GSK3/SHAGGY-like protein kinase 1	1	chr1	1946788	1950860	8.57181	0.0628821	8.36942	0.0939406	8.42061	0.136836	8.34143	0.140535	8.40203	0.157896	8.50545	0.137647	8.07015	0.136517	8.18838	0.144655	8.1327	0.0585576	-0.2	0.19	-0.15	0.39	0.06	0.92	0.16	0.65	0.12	0.69	0.06	0.78
AT1G06400	Ras-related small GTP-binding family protein	0	chr1	1950844	1952785	10.9773	0.181061	11.0845	0.177151	10.8028	0.152394	11.2077	0.188839	11.3504	0.160491	11.1604	0.117539	11.0988	0.197014	11.1687	0.24259	10.8612	0.281619	0.11	0.74	-0.17	0.52	0.14	0.82	-0.05	0.92	0.07	0.89	-0.24	0.64
AT1G06410	trehalose-phosphatase/synthase 7	1	chr1	1954850	1958756	9.84163	0.164645	10.049	0.146431	9.93129	0.108009	9.8414	0.232745	9.5391	0.150875	9.66213	0.219067	9.53428	0.113934	9.29828	0.203483	9.31626	0.154687	0.21	0.43	0.09	0.71	-0.3	0.61	-0.18	0.76	-0.24	0.48	-0.22	0.42
AT1G06420		1	chr1	1958923	1959947	6.77553	0.174443	6.67343	0.153863	6.94397	0.0871805	6.77958	0.34397	6.66413	0.22564	6.98955	0.0674976	6.43746	0.292501	6.56274	0.279965	6.81978	0.114969	-0.1	0.72	0.17	0.45	-0.12	0.92	0.21	0.75	0.13	0.84	0.38	0.39
AT1G06430	FTSH protease 8	0	chr1	1960058	1963011	9.35613	0.19673	9.29894	0.119123	9.06556	0.0969898	9.57057	0.102185	9.64629	0.0536545	9.46372	0.15528	10.0837	0.113319	10.1161	0.160292	9.73159	0.123663	-0.06	0.86	-0.29	0.28	0.08	0.79	-0.11	0.76	0.03	0.92	-0.35	0.2
AT1G06440	Ubiquitin carboxyl-terminal hydrolase family protein	0	chr1	1963380	1965051	6.64361	0.112401	6.64455	0.0620607	6.48737	0.155674	6.75875	0.256725	6.64971	0.0984324	6.87779	0.259662	7.02244	0.197933	6.95174	0.159949	7.02379	0.193762	0	1	-0.16	0.48	-0.11	0.88	0.12	0.86	-0.07	0.86	0	1
AT1G06450	Polynucleotidyl transferase, ribonuclease H-like superfamily protein	1	chr1	1965840	1967219	8.30041	0.0591885	8.34431	0.0646946	8.06603	0.102461	8.86791	0.202446	8.73012	0.150395	8.77603	0.230164	9.55999	0.182387	9.47315	0.087213	9.27397	0.0947759	0.04	0.68	-0.23	0.17	-0.14	0.83	-0.09	0.88	-0.09	0.78	-0.29	0.34
AT1G06460	alpha-crystallin domain 32.1	0	chr1	1967087	1969561	8.39897	0.524262	7.88764	0.0713921	7.79525	0.0542425	8.93683	0.0644371	8.88042	0.135608	9.03179	0.100764	8.69135	0.101351	8.5572	0.167688	8.70129	0.130334	-0.51	0.42	-0.6	0.34	-0.06	0.89	0.09	0.67	-0.13	0.65	0.01	0.97
AT1G06470	Nucleotide/sugar transporter family protein	1	chr1	1969729	1973767	7.9328	0.0829501	7.89015	0.109595	7.73379	0.170554	8.26408	0.17325	8.22059	0.158794	8.26359	0.162141	8.1409	0.156879	7.88479	0.370717	7.9785	0.163994	-0.04	0.82	-0.2	0.37	-0.04	0.95	0	1	-0.26	0.68	-0.16	0.62
AT1G06475		0	chr1	1973834	1974386	8.65631	0.296858	8.65437	0.125085	8.42609	0.081353	8.86749	0.150729	8.80257	0.203122	8.66389	0.0982893	8.24656	0.194646	8.32513	0.233022	8.35548	0.125004	0	1	-0.23	0.52	-0.06	0.92	-0.2	0.53	0.08	0.87	0.11	0.75
AT1G06490	glucan synthase-like 7	1	chr1	1978762	1989409	7.86559	0.219683	7.97317	0.258924	7.68377	0.244259	8.00134	0.220879	7.75735	0.238099	7.72755	0.136603	7.95663	0.278546	7.96393	0.145181	7.97498	0.218945	0.11	0.81	-0.18	0.64	-0.24	0.75	-0.27	0.56	0.01	0.99	0.02	0.98
AT1G06500		1	chr1	1989479	1990730	8.81157	0.119769	8.75378	0.109411	8.57052	0.0979275	8.74067	0.226854	8.83971	0.193291	8.85583	0.275052	8.74603	0.181705	8.75683	0.21499	8.63056	0.0899758	-0.06	0.78	-0.24	0.23	0.1	0.9	0.12	0.87	0.01	0.98	-0.12	0.7
AT1G06515	Protein of unknown function (DUF3317)	0	chr1	1990634	1992228	9.58401	0.120258	9.42065	0.124101	9.57091	0.0337462	9.45399	0.0702717	9.53222	0.0810374	9.4426	0.107822	9.19848	0.105636	9.37621	0.105875	9.33442	0.0344269	-0.16	0.43	-0.01	0.94	0.08	0.76	-0.01	0.97	0.18	0.41	0.14	0.39
AT1G06510		1	chr1	1992333	1993840	8.07897	0.0736955	8.12807	0.137308	7.99981	0.0995693	8.19399	0.0772677	8.28442	0.209411	8.46075	0.0636278	8.34159	0.123939	8.36153	0.116434	8.27209	0.169712	0.05	0.81	-0.08	0.58	0.09	0.88	0.27	0.21	0.02	0.95	-0.07	0.83
AT1G06520	glycerol-3-phosphate acyltransferase 1	0	chr1	1993978	1996112	7.16899	0.305025	7.59682	0.303907	7.12043	0.214879	7.80027	0.221073	7.91319	0.217787	7.83785	0.268843	8.28364	0.315711	7.77906	0.23875	7.75872	0.306535	0.43	0.4	-0.05	0.93	0.11	0.89	0.04	0.96	-0.5	0.38	-0.52	0.4
CUFF.2771		0	chr1	1998126	1998613	5.15595	0.16095	5.59369	0.0998567	5.32255	0.188419	5.21531	0.220791	5.2512	0.266902	5.33474	0.205678	5.25032	0.25196	5.29906	0.26447	5.35948	0.255176	0.44	0.13	0.17	0.56	0.04	0.97	0.12	0.83	0.05	0.94	0.11	0.85
AT1G06530	Tropomyosin-related	1	chr1	2001594	2002596	12.3686	0.0949678	12.4286	0.0631028	12.4084	0.0755282	12.4082	0.142243	12.1617	0.119277	12.3664	0.0982706	12.4204	0.097591	12.1608	0.149487	12.3634	0.127789	0.06	0.66	0.04	0.8	-0.25	0.52	-0.04	0.9	-0.26	0.33	-0.06	0.82
AT1G06540		0	chr1	2002877	2003393	5.81707	0.0795343	6.29099	0.171213	5.72749	0.0406421	6.0382	0.244852	5.78748	0.141364	5.67147	0.230447	6.14301	0.29678	5.8248	0.189915	6.0009	0.0741944	0.47	0.12	-0.09	0.39	-0.25	0.7	-0.37	0.55	-0.32	0.54	-0.14	0.75
AT1G06550	ATP-dependent caseinolytic (Clp) protease/crotonase family protein	0	chr1	2003627	2007190	10.9147	0.0420152	11.2283	0.0735387	10.9899	0.0764203	10.9284	0.117691	10.7174	0.318392	10.6229	0.108068	10.9766	0.175333	10.8167	0.125693	10.8893	0.159277	0.31	0.06	0.08	0.46	-0.21	0.81	-0.31	0.33	-0.16	0.62	-0.09	0.81
AT1G06560	NOL1/NOP2/sun family protein	1	chr1	2007615	2012006	10.4531	0.169513	10.4016	0.117292	10.443	0.0941045	10.4018	0.254906	10.5191	0.295836	10.5472	0.143013	10.4006	0.0598833	10.6389	0.0667664	10.6725	0.234668	-0.05	0.86	-0.01	0.97	0.12	0.91	0.15	0.79	0.24	0.15	0.27	0.43
AT1G06570	phytoene desaturation 1	0	chr1	2011885	2013545	12.7555	0.412691	12.4956	0.223543	12.605	0.283272	12.1309	0.270593	12.5575	0.558169	12.4505	0.137248	11.894	0.214944	12.0281	0.252653	11.7599	0.199882	-0.26	0.65	-0.15	0.82	0.43	0.78	0.32	0.56	0.13	0.79	-0.13	0.76
AT1G06580	Pentatricopeptide repeat (PPR) superfamily protein	0	chr1	2014003	2016054	6.28491	0.0779091	6.1746	0.11964	6.12752	0.129657	6.31914	0.309374	6.29822	0.344162	6.44057	0.162952	6.44214	0.218121	6.39139	0.106129	6.31801	0.0844895	-0.11	0.51	-0.16	0.37	-0.02	0.99	0.12	0.85	-0.05	0.9	-0.12	0.72
AT1G06590		0	chr1	2016308	2024662	8.04263	0.0795886	8.03936	0.109529	8.03328	0.0344483	8.19257	0.0995895	8.01925	0.057648	8.19624	0.0723914	8.13034	0.0896017	8.11356	0.0725556	8.10623	0.138901	0	0.99	-0.01	0.94	-0.17	0.46	0	0.99	-0.02	0.93	-0.02	0.93
AT1G06620	2-oxoglutarate (2OG) and Fe(II)-dependent oxygenase superfamily protein	1	chr1	2025601	2027271	10.2355	0.115959	10.4689	0.176175	10.382	0.0669414	10.0806	0.154281	10.0348	0.302066	10.1757	0.145528	9.67885	0.206323	9.85354	0.139245	9.64694	0.215937	0.23	0.35	0.15	0.35	-0.05	0.96	0.1	0.81	0.17	0.64	-0.03	0.95
AT1G06630	F-box/RNI-like superfamily protein	1	chr1	2027739	2031388	10.5899	0.129336	10.4492	0.113379	10.5648	0.0551053	10.6147	0.313795	10.8438	0.395585	10.7902	0.259076	10.5818	0.19669	10.8154	0.232336	10.6223	0.227666	-0.14	0.49	-0.03	0.9	0.23	0.86	0.18	0.81	0.23	0.61	0.04	0.94
AT1G06640	2-oxoglutarate (2OG) and Fe(II)-dependent oxygenase superfamily protein	1	chr1	2032338	2034018	14.4805	0.21334	14.6446	0.0483186	14.5076	0.0352217	14.2722	0.0547456	14.1104	0.0500745	14.2372	0.11737	14.0905	0.0735927	14.1434	0.18183	14.0664	0.11572	0.16	0.53	0.03	0.93	-0.16	0.3	-0.03	0.89	0.05	0.86	-0.02	0.92
AT1G06645	2-oxoglutarate (2OG) and Fe(II)-dependent oxygenase superfamily protein	1	chr1	2034156	2035626	5.48919	0.114015	5.39292	0.0800095	5.45822	0.251095	5.53154	0.193989	6.50618	1.44289	5.80019	0.181181	5.4917	0.24854	5.65594	0.264347	5.6671	0.22645	-0.1	0.56	-0.03	0.94	0.97	0.79	0.27	0.58	0.16	0.77	0.18	0.73
AT1G06650	2-oxoglutarate (2OG) and Fe(II)-dependent oxygenase superfamily protein	1	chr1	2035839	2037366	9.86136	0.190726	9.70112	0.0601493	9.66842	0.0903696	9.80406	0.173677	10.0938	0.191434	10.0367	0.259503	9.86509	0.239214	10.1312	0.138299	9.73017	0.167601	-0.16	0.5	-0.19	0.43	0.29	0.59	0.23	0.69	0.27	0.51	-0.13	0.76
AT1G06660		0	chr1	2037311	2040246	8.73174	0.0406123	8.68905	0.0707645	8.54746	0.0686735	8.43986	0.168821	8.87171	0.221381	8.64875	0.0632762	7.97502	0.292257	8.41097	0.119332	8.13423	0.164872	-0.04	0.67	-0.18	0.15	0.43	0.45	0.21	0.52	0.44	0.35	0.16	0.75
AT1G06670	nuclear DEIH-boxhelicase	1	chr1	2040433	2047612	9.0675	0.193146	9.11264	0.0526622	9.163	0.0990393	9.42954	0.198507	9.21311	0.178033	9.37919	0.122126	9.60244	0.0977047	9.38727	0.187842	9.52848	0.18054	0.05	0.87	0.1	0.72	-0.22	0.73	-0.05	0.91	-0.22	0.48	-0.07	0.81
AT1G06680	photosystem II subunit P-1	1	chr1	2047825	2049418	11.8879	0.0892876	11.759	0.0544088	11.8518	0.190488	11.7925	0.0823601	11.8832	0.217514	12.0653	0.27923	11.6117	0.192221	11.7435	0.145896	11.6562	0.110718	-0.13	0.31	-0.04	0.9	0.09	0.88	0.27	0.61	0.13	0.72	0.04	0.9
AT1G06690	NAD(P)-linked oxidoreductase superfamily protein	0	chr1	2049602	2052154	9.51337	0.142366	9.39553	0.0589778	9.1412	0.0592587	9.87516	0.0918821	9.85814	0.17297	9.75377	0.205876	10.3748	0.153357	10.2187	0.224044	9.97615	0.136962	-0.12	0.52	-0.37	0.14	-0.02	0.98	-0.12	0.77	-0.16	0.7	-0.4	0.23
AT1G06700	Protein kinase superfamily protein	0	chr1	2052481	2055548	11.4295	0.0859178	11.555	0.0712754	11.3441	0.0970145	11.7724	0.0850177	11.564	0.108651	11.6275	0.114975	11.9523	0.0736194	11.6922	0.135877	11.6953	0.139994	0.13	0.35	-0.09	0.57	-0.21	0.46	-0.14	0.58	-0.26	0.27	-0.26	0.28
AT1G06710	Tetratricopeptide repeat (TPR)-like superfamily protein	0	chr1	2056575	2060242	5.96402	0.216592	5.97867	0.217812	5.96195	0.169164	5.73845	0.36086	5.65122	0.299541	6.54547	0.991323	5.6985	0.257439	5.90646	0.259157	5.96235	0.397385	0.01	0.98	0	1	-0.09	0.95	0.81	0.68	0.21	0.71	0.26	0.71
AT1G06720	P-loop containing nucleoside triphosphate hydrolases superfamily protein	0	chr1	2060444	2067323	9.04063	0.167793	9.16561	0.0588625	9.09201	0.315438	8.96243	0.183198	8.75972	0.143931	9.07405	0.14627	8.86996	0.191191	8.83732	0.240801	9.10904	0.0513677	0.12	0.55	0.05	0.92	-0.2	0.7	0.11	0.8	-0.03	0.95	0.24	0.4
AT1G06730	pfkB-like carbohydrate kinase family protein	1	chr1	2067529	2070446	6.79847	0.0600431	6.98704	0.107933	6.82645	0.0920761	7.06782	0.106637	6.77718	0.141814	6.90064	0.202172	7.00407	0.153339	6.92417	0.128408	6.96325	0.146913	0.19	0.24	0.03	0.85	-0.29	0.43	-0.17	0.69	-0.08	0.79	-0.04	0.91
AT1G06740	transposable element gene	1	chr1	2070737	2073535	8.68895	0.139996	8.71842	0.0680262	8.65996	0.112774	8.60881	0.109815	8.47308	0.0916989	8.49138	0.194093	8.78028	0.131224	8.4883	0.0666954	8.73676	0.0921925	0.03	0.89	-0.03	0.91	-0.14	0.67	-0.12	0.78	-0.29	0.22	-0.04	0.86
AT1G06750	P-loop containing nucleoside triphosphate hydrolases superfamily protein	1	chr1	2072979	2076505	5.39971	0.232632	5.4317	0.198627	5.35758	0.139129	5.38698	0.261878	5.1428	0.173336	5.63209	0.549952	5.43761	0.109461	5.27148	0.284153	5.29154	0.111447	0.03	0.94	-0.04	0.92	-0.24	0.74	0.25	0.83	-0.17	0.72	-0.15	0.51
AT1G06760	winged-helix DNA-binding transcription factor family protein	0	chr1	2076504	2077698	14.039	0.181974	13.7508	0.0867175	13.8113	0.0472345	13.9233	0.107865	14.2935	0.108268	13.9736	0.142836	13.6183	0.117152	13.8765	0.12217	13.6416	0.0331506	-0.29	0.25	-0.23	0.31	0.37	0.27	0.05	0.89	0.26	0.31	0.02	0.91
AT1G06770	DREB2A-interacting protein 1	0	chr1	2078911	2081939	6.91533	0.235852	7.41047	0.17243	7.0563	0.245284	7.21522	0.229386	7.09591	0.355091	7.08366	0.266865	7.2352	0.223519	7.10175	0.22208	7.0881	0.429399	0.5	0.2	0.14	0.74	-0.12	0.92	-0.13	0.84	-0.13	0.78	-0.15	0.85
AT1G06780	galacturonosyltransferase 6	1	chr1	2083311	2087131	8.94083	0.133928	9.01752	0.0963592	8.94308	0.0611685	8.89761	0.0616906	8.83784	0.0322777	8.84178	0.075857	8.83042	0.0512571	8.86321	0.144412	8.79324	0.156669	0.08	0.71	0	0.99	-0.06	0.71	-0.06	0.76	0.03	0.9	-0.04	0.89
AT1G06790	RNA polymerase Rpb7 N-terminal domain-containing protein	1	chr1	2087232	2089786	7.99056	0.117752	8.1644	0.195835	8.20417	0.128069	8.15428	0.170006	8.04671	0.235188	8.16248	0.122108	8.05812	0.123439	7.98553	0.201186	8.01806	0.186499	0.17	0.52	0.21	0.31	-0.11	0.89	0.01	0.99	-0.07	0.84	-0.04	0.91
AT1G06800	alpha/beta-Hydrolases superfamily protein	0	chr1	2089417	2091686	7.45593	0.0869648	7.41256	0.28394	7.48197	0.353869	7.42816	0.242877	7.39421	0.255034	7.28289	0.0898825	7.44809	0.092964	7.43416	0.199003	7.32334	0.100864	-0.04	0.92	0.03	0.96	-0.03	0.98	-0.15	0.76	-0.01	0.97	-0.12	0.52
AT1G06810		0	chr1	2091738	2092528	5.38315	0.154591	5.30344	0.162312	5.17165	0.140542	5.37009	0.184457	5.39813	0.161107	5.57132	0.164072	5.56413	0.166577	5.27998	0.330944	5.49117	0.155241	-0.08	0.78	-0.21	0.39	0.03	0.97	0.2	0.66	-0.28	0.61	-0.07	0.84
AT1G06820	carotenoid isomerase	0	chr1	2092946	2096232	10.0744	0.0596528	10.0643	0.0801191	9.95991	0.111913	10.02	0.15325	10.0596	0.0894242	10.158	0.106347	10.2745	0.155487	10.1544	0.100679	10.2043	0.114872	-0.01	0.95	-0.11	0.44	0.04	0.94	0.14	0.69	-0.12	0.67	-0.07	0.81
AT1G06830	Glutaredoxin family protein	1	chr1	2097151	2097655	7.23475	0.438639	7.15671	0.281401	7.0595	0.3696	6.79412	0.410802	5.93482	0.464403	5.90259	0.0110044	7.39106	0.475819	7.61889	2.11618	7.51412	0.447831	-0.08	0.92	-0.18	0.81	-0.86	0.5	-0.89	0.28	0.23	0.95	0.12	0.91
AT1G06840	Leucine-rich repeat protein kinase family protein	0	chr1	2097747	2103479	10.8102	0.0923957	10.826	0.144072	10.8513	0.0400648	10.9357	0.0306214	10.7729	0.106698	10.7964	0.0969664	11.141	0.165014	10.8815	0.112409	11.017	0.153751	0.02	0.95	0.04	0.74	-0.16	0.47	-0.14	0.46	-0.26	0.37	-0.12	0.71
AT1G06850	basic leucine-zipper 52	1	chr1	2105048	2106749	9.72815	0.139418	9.68254	0.109458	9.84443	0.0790089	9.84318	0.087551	9.77417	0.0801156	9.83987	0.13279	10.0203	0.125698	9.82962	0.143192	10.0114	0.150497	-0.05	0.85	0.12	0.53	-0.07	0.82	0	0.99	-0.19	0.49	-0.01	0.98
AT1G06870	Peptidase S24/S26A/S26B/S26C family protein	1	chr1	2108593	2110986	9.42298	0.145131	9.30855	0.221384	9.33056	0.154468	9.86905	0.156786	9.71626	0.172008	9.7412	0.0981468	10.0824	0.054379	10.0324	0.180827	10.1129	0.089869	-0.11	0.73	-0.09	0.72	-0.15	0.79	-0.13	0.71	-0.05	0.87	0.03	0.85
AT1G06890	nodulin MtN21 /EamA-like transporter family protein	0	chr1	2111363	2114601	10.9572	0.049947	11.1852	0.0612091	11.0851	0.134846	10.9418	0.273409	10.9981	0.187899	10.9852	0.278144	10.8159	0.231035	10.8481	0.243239	10.8662	0.147222	0.23	0.09	0.13	0.44	0.06	0.95	0.04	0.96	0.03	0.96	0.05	0.91
AT1G06900	Insulinase (Peptidase family M16) family protein	0	chr1	2114927	2120745	9.96477	0.225904	9.92618	0.141971	9.87465	0.188496	9.93907	0.312846	9.91931	0.183008	9.95348	0.13662	9.80846	0.102255	9.9117	0.138142	9.96556	0.203716	-0.04	0.92	-0.09	0.81	-0.02	0.99	0.01	0.99	0.1	0.69	0.16	0.64
AT1G06910	TRF-like 7	1	chr1	2120991	2123748	9.00828	0.0557517	8.95094	0.064931	8.8616	0.0340412	9.20276	0.139457	9.10418	0.165134	9.18287	0.167678	9.21254	0.0712812	9.18159	0.154395	9.05858	0.0472039	-0.06	0.57	-0.15	0.15	-0.1	0.86	-0.02	0.97	-0.03	0.91	-0.15	0.25
AT_1_-_1_2124071-2124214		0	chr1	2124072	2124215	6.65365	0.167698	6.68282	0.348476	6.89538	0.152126	6.89373	0.398973	6.84227	0.391048	6.88917	0.420775	6.98029	0.366736	6.81455	0.351095	7.11428	0.215421	0.03	0.96	0.24	0.36	-0.05	0.98	0	1	-0.17	0.83	0.13	0.84
AT1G06920	ovate family protein 4	0	chr1	2124854	2125801	5.59702	0.157154	5.76548	0.273471	5.63214	0.0605907	5.63389	0.169535	5.54388	0.173641	5.58896	0.181433	5.50967	0.187458	5.55743	0.148576	5.55023	0.3316	0.17	0.66	0.04	0.88	-0.09	0.89	-0.04	0.93	0.05	0.9	0.04	0.95
AT1G06923		1	chr1	2126749	2128060	6.63342	0.149188	6.56663	0.267329	6.74499	0.0928448	6.27462	0.208868	6.47416	0.0979241	6.36791	0.23212	6.47841	0.312917	6.42789	0.167673	6.56714	0.288587	-0.07	0.88	0.11	0.59	0.2	0.71	0.09	0.88	-0.05	0.93	0.09	0.9
AT1G06925		0	chr1	2127704	2128611	5.84673	0.191961	5.51601	0.0878745	5.77995	0.162186	5.70619	0.293819	5.65081	0.303772	5.74888	0.203722	5.73193	0.198212	5.91817	0.186525	6.64426	1.85717	-0.33	0.23	-0.07	0.84	-0.06	0.97	0.04	0.96	0.19	0.65	0.91	0.74
AT1G06930		1	chr1	2128843	2129883	9.84646	0.145611	9.31373	0.152539	9.51351	0.145407	9.43613	0.273519	10.1697	0.382293	9.88577	0.181613	10.6566	0.307259	11.1607	0.156029	10.8545	0.29602	-0.53	0.12	-0.33	0.22	0.73	0.45	0.45	0.46	0.5	0.33	0.2	0.76
AT1G06950	translocon at the inner envelope membrane of chloroplasts 110	0	chr1	2130142	2135665	10.4686	0.224633	10.7425	0.078359	10.6576	0.128467	10.5966	0.0542299	10.2335	0.145333	10.4076	0.0826868	10.6542	0.0779586	10.2785	0.075359	10.3626	0.0965539	0.27	0.34	0.19	0.53	-0.36	0.27	-0.19	0.33	-0.38	0.11	-0.29	0.17
AT1G06960	RNA-binding (RRM/RBD/RNP motifs) family protein	1	chr1	2135851	2137732	11.4596	0.0949317	11.4014	0.144762	11.3613	0.0694738	11.438	0.12238	11.4071	0.151406	11.4315	0.173217	11.2849	0.0934302	11.3781	0.147688	11.3017	0.206935	-0.06	0.8	-0.1	0.47	-0.03	0.96	-0.01	0.99	0.09	0.73	0.02	0.97
AT1G06970	cation/hydrogen exchanger 14	1	chr1	2138109	2140818	5.45128	0.204754	5.33685	0.130379	5.45452	0.102074	5.98434	1.15444	5.27186	0.218617	5.44198	0.204228	5.27382	0.290109	5.31444	0.305555	5.48817	0.244112	-0.11	0.7	0	0.99	-0.71	0.81	-0.54	0.8	0.04	0.96	0.21	0.7
AT1G06980		0	chr1	2143031	2143821	6.24763	0.239565	6.28433	0.188183	6.31782	0.0923981	6.25448	0.167468	6.6319	0.14906	6.4529	0.179445	6.2833	0.261684	6.34111	0.181546	6.53453	0.107912	0.04	0.94	0.07	0.84	0.38	0.42	0.2	0.66	0.06	0.91	0.25	0.53
AT1G06990	GDSL-like Lipase/Acylhydrolase superfamily protein	1	chr1	2148387	2150152	4.86554	0.2211	4.79907	0.214855	4.9887	0.258117	4.85114	0.0906515	4.77435	0.11481	4.78915	0.234788	4.60938	0.258599	4.77771	0.218594	4.81445	0.248266	-0.07	0.88	0.12	0.78	-0.08	0.84	-0.06	0.9	0.17	0.74	0.21	0.7
AT1G07000	exocyst subunit exo70 family protein B2	0	chr1	2150194	2152325	10.446	0.116898	10.6259	0.137893	10.328	0.0954799	10.8417	0.0831182	10.6708	0.217966	10.5903	0.291719	10.7979	0.221889	10.4196	0.0881029	10.3944	0.156235	0.18	0.4	-0.12	0.5	-0.17	0.76	-0.25	0.65	-0.38	0.3	-0.4	0.32
AT1G07010	Calcineurin-like metallo-phosphoesterase superfamily protein	1	chr1	2152852	2155269	5.71662	0.103113	5.5996	0.0968698	5.67127	0.0740539	5.67252	0.14534	5.56333	0.195366	5.89227	0.300137	5.62952	0.180535	5.43468	0.203893	5.69613	0.129225	-0.12	0.49	-0.05	0.78	-0.11	0.86	0.22	0.73	-0.19	0.63	0.07	0.85
AT1G07020		0	chr1	2155213	2156008	12.0828	0.0758404	11.983	0.0744802	11.9978	0.0774043	11.999	0.0966148	12.1675	0.0755546	12.0912	0.110217	11.91	0.139897	12.1501	0.0746193	12.0015	0.0181045	-0.1	0.43	-0.09	0.5	0.17	0.5	0.09	0.74	0.24	0.32	0.09	0.66
AT_1_+_1_2157050-2157205		1	chr1	2157051	2157206	5.71349	0.142096	5.33652	0.0700871	5.23721	0.199573	5.68332	0.0782474	5.56312	0.190323	6.14108	0.795164	5.78972	0.19736	5.65224	0.220838	5.66851	0.0570898	-0.38	0.12	-0.48	0.18	-0.12	0.82	0.46	0.76	-0.14	0.76	-0.12	0.69
AT1G07025	Mitochondrial substrate carrier family protein	0	chr1	2157658	2158158	4.87543	0.122507	4.74264	0.10921	4.69127	0.194007	4.90924	0.291688	4.8702	0.151976	5.04412	0.264443	4.82212	0.164307	4.78305	0.0751308	4.74127	0.0967625	-0.13	0.49	-0.18	0.49	-0.04	0.97	0.13	0.86	-0.04	0.9	-0.08	0.78
AT1G07030	Mitochondrial substrate carrier family protein	0	chr1	2158420	2160809	11.4167	0.190279	11.2475	0.103559	11.4173	0.163772	11.2199	0.0553852	11.1871	0.164489	11.2133	0.193831	11.1172	0.0589315	10.9769	0.14465	11.1552	0.109421	-0.17	0.51	0	1	-0.03	0.95	-0.01	0.99	-0.14	0.54	0.04	0.84
AT1G07040		0	chr1	2160938	2163308	9.59001	0.50425	9.59201	0.264104	9.52558	0.251268	9.66916	0.17234	10.1343	0.352196	9.97712	0.208099	9.68974	0.16941	10.0338	0.193457	9.58267	0.218944	0	1	-0.06	0.94	0.47	0.57	0.31	0.53	0.34	0.36	-0.11	0.8
AT1G07050	CCT motif family protein	0	chr1	2164188	2165239	5.86105	0.27949	6.01638	0.0997703	5.7238	0.107457	6.50153	0.238478	6.34623	0.221471	6.73905	0.318726	6.71695	0.0611568	6.65096	0.184544	6.58884	0.116661	0.16	0.67	-0.14	0.71	-0.16	0.85	0.24	0.75	-0.07	0.83	-0.13	0.49
AT1G07051	MIR847a; miRNA	1	chr1	2165517	2165746	4.78752	0.149905	4.99962	0.14831	5.07333	0.113486	4.86218	0.123541	4.96406	0.293214	5.12785	0.400987	4.79922	0.134167	4.98751	0.161937	5.29552	0.63993	0.21	0.4	0.29	0.24	0.1	0.9	0.27	0.74	0.19	0.54	0.5	0.6
AT_1_+_1_2166581-2166739		1	chr1	2166582	2166740	5.19426	0.124784	5.32629	0.138451	5.24249	0.110046	5.10855	0.273741	5.18003	0.0984342	5.34342	0.367358	5.24451	0.180597	5.09	0.130176	5.09835	0.222297	0.13	0.55	0.05	0.83	0.07	0.93	0.23	0.78	-0.15	0.65	-0.15	0.73
AT1G07060		0	chr1	2167107	2168397	5.48595	0.113071	5.42332	0.206239	5.51684	0.103836	5.24008	0.232933	5.18612	0.254647	5.10758	0.222585	5.03643	0.134792	5.0792	0.181071	5.32103	0.29956	-0.06	0.85	0.03	0.89	-0.05	0.96	-0.13	0.82	0.04	0.91	0.28	0.54
AT1G07070	Ribosomal protein L35Ae family protein	1	chr1	2168564	2169851	11.6591	0.232071	11.5856	0.145718	11.7219	0.13809	11.4942	0.138395	11.3915	0.260215	11.5876	0.0487721	11.6554	0.120583	11.775	0.0836515	11.8782	0.143838	-0.07	0.84	0.06	0.87	-0.1	0.89	0.09	0.73	0.12	0.58	0.22	0.4
AT1G07080	Thioredoxin superfamily protein	1	chr1	2169982	2172194	8.14197	0.0620569	8.12497	0.0252349	8.09094	0.0945174	8.18823	0.113581	8.14666	0.0862691	8.12834	0.131949	8.12268	0.156607	8.13792	0.192932	7.98022	0.121557	-0.02	0.85	-0.05	0.71	-0.04	0.91	-0.06	0.86	0.02	0.97	-0.14	0.62
AT1G07090	Protein of unknown function (DUF640)	0	chr1	2173952	2174894	7.12684	0.116753	7.15285	0.124567	7.01518	0.0869042	7.62943	0.046033	7.44655	0.163072	7.42914	0.181825	7.42634	0.186364	7.22968	0.0505823	7.41248	0.103896	0.03	0.92	-0.11	0.51	-0.18	0.61	-0.2	0.56	-0.2	0.48	-0.01	0.97
AT1G07110	fructose-2,6-bisphosphatase	0	chr1	2178104	2184148	11.0881	0.229338	10.7878	0.0925198	10.9228	0.0488073	11.0666	0.245901	11.5479	0.0671948	11.3775	0.101115	11.079	0.225279	11.4506	0.347003	11.2562	0.0971701	-0.3	0.32	-0.17	0.54	0.48	0.36	0.31	0.52	0.37	0.54	0.18	0.62
AT1G07119	other RNA	1	chr1	2184347	2186539	7.03738	0.0310424	7.07546	0.121896	7.12478	0.0667399	6.61505	0.165111	6.81084	0.189461	6.82063	0.0726386	6.77683	0.138079	6.88668	0.158348	7.13752	0.264235	0.04	0.82	0.09	0.32	0.2	0.74	0.21	0.53	0.11	0.73	0.36	0.4
AT1G07120		0	chr1	2184759	2186580	5.8306	0.0719275	5.95809	0.15056	5.92091	0.0547821	5.73527	0.316623	5.75661	0.227853	5.80477	0.251505	6.5474	0.266697	6.28647	0.185017	6.46691	0.0602849	0.13	0.52	0.09	0.39	0.02	0.99	0.07	0.94	-0.26	0.59	-0.08	0.85
AT1G07128		0	chr1	2187621	2188417	10.4243	0.158989	10.4695	0.0386329	10.3182	0.211299	10.7859	0.107035	10.7554	0.164905	10.5607	0.177565	11.0334	0.157296	10.7467	0.120771	10.5453	0.215023	0.05	0.84	-0.11	0.75	-0.03	0.96	-0.23	0.55	-0.29	0.33	-0.49	0.25
AT1G07130	Nucleic acid-binding, OB-fold-like protein	1	chr1	2187776	2188733	9.14374	0.0714302	9.25314	0.127957	8.89042	0.191054	9.21673	0.0723845	9.25605	0.215956	9.10469	0.190827	9.48532	0.215845	9.43818	0.1077	9.28476	0.047639	0.11	0.53	-0.25	0.31	0.04	0.95	-0.11	0.77	-0.05	0.91	-0.2	0.52
AT_1_-_2_2189335-2189472		0	chr1	2189336	2189473	5.07071	0.197593	5.21452	0.113628	5.16211	0.0532754	5.31655	0.159004	5.35053	0.186295	5.44353	0.164291	5.44524	0.22497	5.43937	0.0890196	5.28133	0.159348	0.14	0.6	0.09	0.72	0.03	0.96	0.13	0.77	-0.01	0.99	-0.16	0.69
AT1G07135	glycine-rich protein	0	chr1	2189928	2190659	12.7855	0.192178	12.8978	0.667808	13.405	0.519566	13.1298	0.39783	13.3252	0.417922	12.1971	0.496829	13.2588	0.241542	12.914	0.376697	13.3005	0.229727	0.11	0.91	0.62	0.35	0.2	0.9	-0.93	0.44	-0.34	0.6	0.04	0.95
AT1G07140	Pleckstrin homology (PH) domain superfamily protein	0	chr1	2191723	2193793	8.33137	0.157491	8.48768	0.149898	8.19729	0.168585	8.62007	0.10092	8.53788	0.116991	8.46994	0.123326	8.43162	0.260028	8.36696	0.170676	8.22373	0.143996	0.16	0.54	-0.13	0.62	-0.08	0.84	-0.15	0.61	-0.06	0.9	-0.21	0.63
AT1G07150	mitogen-activated protein kinase kinase kinase 13	0	chr1	2193941	2195798	5.62452	0.12647	5.22535	0.212772	5.37941	0.279061	5.66566	0.3255	5.19921	0.467225	5.35669	0.160473	5.32582	0.232507	5.33995	0.157209	5.62466	0.433253	-0.4	0.22	-0.25	0.49	-0.47	0.73	-0.31	0.64	0.01	0.98	0.3	0.68
AT1G07160	Protein phosphatase 2C family protein	0	chr1	2197908	2199748	7.20509	0.568943	6.91635	0.620323	7.62503	0.607451	7.93945	0.54086	7.83629	0.186738	7.50404	0.382924	7.90332	0.277488	7.92018	0.445563	7.75534	0.323914	-0.29	0.79	0.42	0.68	-0.1	0.95	-0.44	0.73	0.02	0.99	-0.15	0.82
AT1G07170	PHF5-like protein	1	chr1	2200123	2201265	12.3807	0.0543142	12.3236	0.0635803	12.3011	0.0262714	12.4341	0.0595656	12.4528	0.131193	12.4285	0.134114	12.338	0.0660966	12.3918	0.0973717	12.2808	0.0850289	-0.06	0.57	-0.08	0.28	0.02	0.97	-0.01	0.99	0.05	0.76	-0.06	0.72
AT1G07175		1	chr1	2202330	2202774	8.69907	0.149427	9.01336	0.0735263	8.47648	0.136882	8.62769	0.189134	8.85317	0.136816	8.88298	0.132685	8.42207	0.265117	8.84942	0.144733	8.67834	0.218907	0.31	0.17	-0.22	0.35	0.23	0.66	0.26	0.54	0.43	0.34	0.26	0.61
AT_1_+_2_2203851-2204003		1	chr1	2203852	2204004	5.15005	0.206207	5.27964	0.0922262	5.22848	0.138541	5.29217	0.17652	5.25394	0.275348	5.21683	0.0791912	5.41422	0.020816	5.72337	0.568123	5.14556	0.155369	0.13	0.63	0.08	0.81	-0.04	0.97	-0.08	0.83	0.31	0.72	-0.27	0.27
AT1G07180	alternative NAD(P)H dehydrogenase 1	1	chr1	2204320	2206934	6.7318	0.0668705	6.86685	0.0666712	6.83474	0.225364	6.48246	0.26512	6.75397	0.176389	6.49964	0.191465	6.48663	0.212346	6.6075	0.159827	6.33822	0.143135	0.14	0.25	0.1	0.72	0.27	0.71	0.02	0.98	0.12	0.76	-0.15	0.69
AT1G07190		1	chr1	2208013	2208177	5.37394	0.110336	5.58288	0.149825	5.57846	0.150233	5.40634	0.15394	5.50013	0.265665	5.29164	0.0495717	5.51243	0.293341	5.69665	0.178711	5.54638	0.404656	0.21	0.35	0.2	0.35	0.09	0.91	-0.11	0.71	0.18	0.72	0.03	0.97
AT1G07200	Double Clp-N motif-containing P-loop nucleoside triphosphate hydrolases superfamily protein	0	chr1	2208719	2212546	8.51215	0.197543	8.91066	0.105532	8.69786	0.128555	8.52709	0.293347	8.1508	0.179165	8.29183	0.125635	8.3513	0.2347	8.04348	0.169619	8.01941	0.156889	0.4	0.19	0.19	0.5	-0.38	0.61	-0.24	0.69	-0.31	0.46	-0.33	0.41
AT1G07210	Ribosomal protein S18	1	chr1	2215223	2216982	11.9089	0.139435	11.8356	0.0237552	11.9501	0.138217	11.7856	0.234623	11.7854	0.214696	11.8565	0.124044	11.5648	0.121363	11.7023	0.185662	11.7197	0.11004	-0.07	0.67	0.04	0.88	0	1	0.07	0.89	0.14	0.68	0.15	0.5
AT1G07220	Arabidopsis thaliana protein of unknown function (DUF821)	0	chr1	2216925	2219474	9.2635	0.12825	9.41782	0.129344	9.19366	0.155615	9.82926	0.114668	9.53398	0.106532	9.48455	0.14651	9.67013	0.14473	9.59393	0.140858	9.592	0.10143	0.15	0.48	-0.07	0.79	-0.3	0.36	-0.34	0.34	-0.08	0.8	-0.08	0.77
AT1G07230	non-specific phospholipase C1	0	chr1	2220253	2222982	9.40146	0.0472368	9.48937	0.0953123	9.46189	0.102435	9.50264	0.0559121	9.73159	0.0911972	9.78144	0.0946241	9.64747	0.0418261	9.69535	0.152215	9.704	0.0636907	0.09	0.49	0.06	0.65	0.23	0.31	0.28	0.24	0.05	0.85	0.06	0.61
AT1G07240	UDP-glucosyl transferase 71C5	1	chr1	2223691	2225452	12.4109	0.133807	12.4178	0.0828082	12.4899	0.106435	12.6243	0.0775369	12.5819	0.13724	12.6448	0.144103	12.5858	0.0939255	12.5042	0.0350825	12.6396	0.0707405	0.01	0.98	0.08	0.71	-0.04	0.92	0.02	0.95	-0.08	0.58	0.05	0.76
AT1G07250	UDP-glucosyl transferase 71C4	1	chr1	2225900	2227566	11.0301	0.192093	11.141	0.120483	11.0881	0.0114922	11.1246	0.140493	11.2456	0.150282	11.0636	0.122348	10.9627	0.0711122	10.8838	0.0424982	10.7634	0.0778742	0.11	0.69	0.06	0.82	0.12	0.82	-0.06	0.86	-0.08	0.51	-0.2	0.24
AT1G07260	UDP-glucosyl transferase 71C3	0	chr1	2227594	2229319	10.9784	0.0939929	11.1192	0.0417765	11.1298	0.127611	11.3295	0.291755	10.9686	0.259723	10.9502	0.207047	10.8995	0.218499	10.4599	0.135963	10.88	0.103802	0.14	0.27	0.15	0.41	-0.36	0.68	-0.38	0.56	-0.44	0.27	-0.02	0.97
AT1G07270	Cell division control, Cdc6	0	chr1	2229757	2232897	6.05249	0.0723617	6.2002	0.084609	6.22756	0.122198	6.1783	0.10137	6.07271	0.112128	6.1054	0.06697	6.11981	0.22865	5.9268	0.348876	6.15681	0.150171	0.15	0.28	0.18	0.31	-0.11	0.78	-0.07	0.75	-0.19	0.76	0.04	0.94
AT_1_-_1_2233436-2233549		0	chr1	2233437	2233550	5.73339	0.171039	6.02664	0.165223	5.98718	0.11013	6.33507	0.455882	6.26378	0.295801	6.16089	0.315076	6.31964	0.362566	5.91951	0.263028	6.07932	0.137772	0.29	0.31	0.25	0.31	-0.07	0.97	-0.17	0.87	-0.4	0.54	-0.24	0.67
AT_1_-_2_2237251-2237343		0	chr1	2237252	2237344	5.56847	0.00875912	5.90032	0.159062	5.68744	0.150538	5.7093	0.131719	5.87166	0.385483	5.69059	0.219299	5.71054	0.210254	5.75745	0.169152	5.83128	0.284972	0.33	0.15	0.12	0.5	0.16	0.88	-0.02	0.97	0.05	0.92	0.12	0.82
AT1G07280	Tetratricopeptide repeat (TPR)-like superfamily protein	1	chr1	2238087	2241217	7.47996	0.0532579	7.24111	0.0873328	7.28374	0.0725589	7.45842	0.296237	7.28756	0.241465	7.56001	0.299001	6.4376	0.206699	6.58884	0.141582	6.60348	0.40503	-0.24	0.13	-0.2	0.16	-0.17	0.86	0.1	0.9	0.15	0.69	0.17	0.81
AT1G07290	golgi nucleotide sugar transporter 2	0	chr1	2242256	2244428	7.90098	0.0853592	7.90108	0.0845052	7.84649	0.0598933	7.69164	0.240459	7.81856	0.116522	7.71844	0.162824	7.42553	0.0890018	7.63754	0.122906	7.58911	0.165669	0	1	-0.05	0.66	0.13	0.85	0.03	0.97	0.21	0.34	0.16	0.54
AT1G07300	josephin protein-related	0	chr1	2245758	2246492	9.87479	0.103067	9.44199	0.0645067	9.49119	0.115853	9.75014	0.166476	9.61421	0.1879	9.78371	0.316716	9.51294	0.213617	9.71118	0.135468	9.59744	0.0861626	-0.43	0.07	-0.38	0.13	-0.14	0.84	0.03	0.97	0.2	0.6	0.08	0.81
AT1G07310	Calcium-dependent lipid-binding (CaLB domain) family protein	0	chr1	2247509	2248961	13.4691	0.0287796	13.4232	0.100494	13.3275	0.0506694	13.5391	0.107958	13.5394	0.152563	13.5424	0.148504	13.5881	0.0747215	13.6408	0.21624	13.464	0.0670692	-0.05	0.72	-0.14	0.14	0	1	0	0.99	0.05	0.89	-0.12	0.39
AT1G07320	ribosomal protein L4	1	chr1	2249133	2250529	11.3138	0.0726276	11.2736	0.0639276	11.2584	0.0889334	11.1172	0.165073	11.1278	0.109123	11.2096	0.173599	11.305	0.0844811	11.0649	0.167901	11.2554	0.165789	-0.04	0.74	-0.06	0.69	0.01	0.99	0.09	0.83	-0.24	0.38	-0.05	0.87
AT1G07330		1	chr1	2251131	2253585	5.05616	0.171549	5.26023	0.2123	5.25263	0.310193	5.41522	0.525433	5.07053	0.118938	5.44317	0.373678	5.32354	0.251084	5.12173	0.263929	5.11845	0.170215	0.2	0.53	0.2	0.64	-0.34	0.8	0.03	0.99	-0.2	0.71	-0.21	0.64
AT1G07340	sugar transporter 2	1	chr1	2254822	2256850	4.49675	0.279351	4.72795	0.282051	4.59763	0.274817	4.53807	0.332168	4.55413	0.200261	4.7689	0.241719	4.67079	0.296778	4.69951	0.484021	4.61843	0.0687657	0.23	0.63	0.1	0.85	0.02	0.99	0.23	0.76	0.03	0.98	-0.05	0.92
AT1G07350	RNA-binding (RRM/RBD/RNP motifs) family protein	0	chr1	2257425	2260101	7.27116	0.199355	7.274	0.216361	7.3011	0.221662	7.07505	0.394613	7.2872	0.27943	7.34279	0.214508	8.29272	0.15374	8.42948	0.163005	8.50395	0.164534	0	1	0.03	0.95	0.21	0.86	0.27	0.75	0.14	0.69	0.21	0.51
AT1G07360	CCCH-type zinc fingerfamily protein with RNA-binding domain	0	chr1	2260389	2262865	11.0451	0.190457	10.8157	0.0604881	10.9489	0.033483	10.826	0.0846675	10.9434	0.124026	10.9403	0.114806	10.7639	0.166549	10.8872	0.100881	10.9392	0.0882549	-0.23	0.34	-0.1	0.68	0.12	0.74	0.11	0.66	0.12	0.68	0.18	0.51
AT1G07370	proliferating cellular nuclear antigen 1	1	chr1	2263140	2264551	10.691	0.242554	10.5658	0.12856	10.3779	0.0914336	11.0953	0.73631	11.5335	1.08896	11.1515	0.915594	11.1321	0.630771	11.8401	0.88411	11.4812	0.433263	-0.13	0.71	-0.31	0.32	0.44	0.9	0.06	0.98	0.71	0.67	0.35	0.76
AT1G07380	Neutral/alkaline non-lysosomal ceramidase	0	chr1	2264829	2268306	11.0065	0.0855936	10.9999	0.124107	11.1241	0.0421539	10.8975	0.11625	11.1713	0.207492	11.1395	0.127029	10.8987	0.0417423	10.9465	0.119182	11.0188	0.0644981	-0.01	0.98	0.12	0.31	0.27	0.58	0.24	0.45	0.05	0.8	0.12	0.3
AT_1_+_1_2268839-2268997		1	chr1	2268841	2268999	5.79795	0.133765	5.74827	0.103763	5.79522	0.114383	5.60051	0.236573	5.37852	0.146922	5.68814	0.077265	5.57248	0.318488	5.69729	0.283303	5.98131	0.384571	-0.05	0.83	0	0.99	-0.22	0.74	0.09	0.85	0.12	0.85	0.41	0.57
AT_1_-_0_2269485-2269577		0	chr1	2269487	2269579	5.33676	0.00223198	5.56645	0.1675	5.51929	0.197695	5.2282	0.193802	5.41943	0.352752	5.39817	0.435645	5.54917	0.36447	5.54301	0.386197	5.50525	0.195674	0.23	0.27	0.18	0.43	0.19	0.85	0.17	0.85	-0.01	1	-0.04	0.95
AT1G07390	receptor like protein 1	1	chr1	2269893	2274820	6.28412	0.175961	6.1223	0.0248233	6.06795	0.072532	6.04693	0.204008	5.97584	0.266393	6.05353	0.174077	6.07477	0.160528	6.07829	0.136309	6.08835	0.0968552	-0.16	0.44	-0.22	0.34	-0.07	0.94	0.01	0.99	0	0.99	0.01	0.97
AT1G07400	HSP20-like chaperones superfamily protein	1	chr1	2274943	2275758	9.05653	0.877414	9.07585	0.738494	8.48053	0.834403	11.2511	0.430778	10.4005	1.05784	10.4045	0.43514	12.0381	0.217129	12.104	0.366907	11.6257	0.390205	0.02	0.99	-0.58	0.7	-0.85	0.76	-0.85	0.46	0.07	0.93	-0.41	0.51
AT1G07410	RAB GTPase homolog A2B	1	chr1	2276053	2277154	7.79321	0.183186	7.62099	0.107461	7.75628	0.106584	7.83489	0.151501	7.93472	0.25639	8.1806	0.111597	7.86355	0.113642	8.13156	0.0877697	8.16487	0.0911414	-0.17	0.49	-0.04	0.9	0.1	0.9	0.35	0.35	0.27	0.24	0.3	0.21
AT1G07420	sterol 4-alpha-methyl-oxidase 2-1	1	chr1	2277807	2280297	11.6423	0.0889226	11.4166	0.0803902	11.4155	0.0533486	11.59	0.166673	11.3796	0.0725427	11.4215	0.213745	11.1742	0.0599746	11.1212	0.100059	11.1618	0.138009	-0.23	0.17	-0.23	0.15	-0.21	0.58	-0.17	0.74	-0.05	0.76	-0.01	0.96
AT1G07430	highly ABA-induced PP2C gene 2	0	chr1	2280835	2282828	6.00683	0.432185	5.82921	0.454218	5.70633	0.233142	6.69603	0.533162	6.49453	0.494812	6.30532	0.278775	6.99454	0.352465	6.72984	0.381135	6.9871	0.271655	-0.18	0.83	-0.3	0.6	-0.2	0.92	-0.39	0.73	-0.26	0.74	-0.01	0.99
AT1G07440	NAD(P)-binding Rossmann-fold superfamily protein	0	chr1	2286149	2287730	6.36916	0.215885	6.29329	0.119953	6.20486	0.0846931	6.0388	0.0808472	6.3523	0.129994	6.29053	0.100279	6.12692	0.332181	6.53799	0.110203	6.35145	0.154564	-0.08	0.82	-0.16	0.54	0.31	0.33	0.25	0.32	0.41	0.42	0.22	0.68
AT1G07450	NAD(P)-binding Rossmann-fold superfamily protein	0	chr1	2287926	2289336	5.12206	0.150711	5.35128	0.178128	5.31905	0.117499	5.44741	0.121326	5.26576	0.369071	5.40886	0.13959	5.30477	0.104326	5.40338	0.174867	5.16486	0.229411	0.23	0.41	0.2	0.38	-0.18	0.86	-0.04	0.92	0.1	0.75	-0.14	0.71
AT1G07460	Concanavalin A-like lectin family protein	1	chr1	2290201	2290977	5.58361	0.163672	5.29114	0.184065	5.36504	0.131794	5.84534	0.45825	5.67246	0.267042	5.70969	0.217515	5.69334	0.224323	5.504	0.139685	5.55359	0.200445	-0.29	0.33	-0.22	0.38	-0.17	0.9	-0.14	0.89	-0.19	0.63	-0.14	0.75
AT1G07470	Transcription factor IIA, alpha/beta subunit	1	chr1	2291457	2294588	9.85736	0.152552	9.84075	0.128062	9.98533	0.0766221	9.77263	0.145658	9.87432	0.0690643	9.98803	0.281669	9.76853	0.162894	9.76923	0.135405	9.74187	0.146542	-0.02	0.96	0.13	0.52	0.1	0.8	0.22	0.72	0	1	-0.03	0.95
AT1G07473		0	chr1	2294566	2295489	5.62665	0.30086	5.47457	0.164651	5.49544	0.0872749	5.98042	0.925498	5.64449	0.18621	5.50819	0.104556	5.45691	0.0483065	5.51906	0.176989	5.41453	0.108236	-0.15	0.72	-0.13	0.73	-0.34	0.89	-0.47	0.79	0.06	0.83	-0.04	0.82
AT1G07476		1	chr1	2295751	2296497	4.87558	0.271866	4.98548	0.154825	5.12093	0.115097	5.05494	0.13305	5.02989	0.287014	5.01497	0.113523	5.15486	0.353595	4.99058	0.164102	5.19226	0.251101	0.11	0.79	0.25	0.47	-0.03	0.98	-0.04	0.91	-0.16	0.78	0.04	0.96
AT1G07480	Transcription factor IIA, alpha/beta subunit	0	chr1	2296023	2299470	5.10852	0.194047	5.01374	0.363351	4.93922	0.0730012	5.15787	0.120912	5.25743	0.0294026	5.34072	0.210865	5.02392	0.190725	5.24096	0.0882948	5.32086	0.239972	-0.09	0.87	-0.17	0.48	0.1	0.74	0.18	0.69	0.22	0.47	0.3	0.49
CUFF.3235		0	chr1	2300834	2301075	4.98716	0.0554882	5.0155	0.131215	4.954	0.172106	5.30474	0.105223	5.2578	0.212918	5.18021	0.0562486	5.3237	0.168488	5.18578	0.11912	5.34955	0.131421	0.03	0.89	-0.03	0.9	-0.05	0.94	-0.12	0.57	-0.14	0.66	0.03	0.95
AT1G07485		1	chr1	2301375	2302121	5.6585	0.152935	5.71075	0.309194	5.74138	0.100973	5.61977	0.333536	5.81238	0.161636	5.76416	0.0607428	5.76107	0.171831	5.83083	0.233036	5.73218	0.217386	0.05	0.92	0.08	0.71	0.19	0.84	0.14	0.82	0.07	0.88	-0.03	0.95
AT1G07490	ROTUNDIFOLIA like 3	0	chr1	2301380	2302021	6.69786	0.15777	6.59275	0.0990523	6.6237	0.0812807	6.66442	0.222562	6.79735	0.262461	6.87238	0.190557	6.47279	0.380196	6.53186	0.232909	6.7073	0.306613	-0.11	0.64	-0.07	0.74	0.13	0.88	0.21	0.7	0.06	0.94	0.23	0.75
AT1G07500		0	chr1	2304766	2305031	7.11152	0.153664	8.32147	0.154239	7.58311	0.166275	9.37541	0.270069	9.36648	0.159437	9.32039	0.2482	13.8253	0.137935	13.2895	0.182723	13.4028	0.0620475	1.21	0.04	0.47	0.16	-0.01	0.99	-0.06	0.94	-0.54	0.17	-0.42	0.12
AT1G07510	FTSH protease 10	1	chr1	2305378	2309544	11.4521	0.0505996	11.4951	0.134035	11.5666	0.0528988	11.5376	0.157711	11.3285	0.200723	11.3924	0.202431	11.9695	0.145996	11.5798	0.166879	11.7378	0.131087	0.04	0.82	0.11	0.23	-0.21	0.73	-0.15	0.76	-0.39	0.26	-0.23	0.41
AT1G07520	GRAS family transcription factor	0	chr1	2309564	2311805	10.7784	0.0263103	10.8011	0.0504854	11.1103	0.107694	10.8342	0.10626	10.996	0.0136835	11.0662	0.114003	11.7586	0.120171	11.6454	0.0597651	11.7359	0.119022	0.02	0.75	0.33	0.1	0.16	0.46	0.23	0.43	-0.11	0.57	-0.02	0.94
AT1G07530	SCARECROW-like 14	0	chr1	2313582	2316469	10.511	0.130815	10.638	0.196101	10.7232	0.0314755	10.6924	0.258117	10.7527	0.120903	10.7412	0.179312	10.9698	0.1508	10.8094	0.180116	10.7471	0.166254	0.13	0.66	0.21	0.23	0.06	0.94	0.05	0.94	-0.16	0.65	-0.22	0.48
AT1G07540	TRF-like 2	0	chr1	2318433	2321048	5.17559	0.157044	5.28981	0.144987	5.33867	0.178618	5.2297	0.241355	5.69555	0.455013	5.26395	0.193026	5.22831	0.145998	5.11949	0.15637	5.04045	0.473399	0.11	0.66	0.16	0.55	0.47	0.69	0.03	0.96	-0.11	0.74	-0.19	0.8
AT_1_-_1_2321744-2321953		0	chr1	2321747	2321956	5.85468	0.0731288	6.17569	0.305064	5.90016	0.142635	5.77662	0.0780806	5.80657	0.24179	5.95618	0.122225	6.01444	0.157944	5.94057	0.212095	5.80774	0.168774	0.32	0.39	0.05	0.83	0.03	0.97	0.18	0.5	-0.07	0.86	-0.21	0.53
AT1G07550	Leucine-rich repeat protein kinase family protein	0	chr1	2322653	2326561	9.18807	0.181112	9.03828	0.236836	8.66877	0.172886	9.70014	0.0952337	9.40592	0.0944524	9.28058	0.0968078	9.87043	0.0560931	9.39646	0.282222	9.28552	0.106597	-0.15	0.68	-0.52	0.16	-0.29	0.3	-0.42	0.17	-0.47	0.28	-0.58	0.04
AT1G07560	Leucine-rich repeat protein kinase family protein	1	chr1	2327320	2331096	11.7789	0.105365	11.467	0.0922565	11.1548	0.126067	11.6856	0.104355	11.4567	0.153527	11.372	0.18741	11.612	0.064478	11.2267	0.147652	11.042	0.0964277	-0.31	0.14	-0.62	0.08	-0.23	0.56	-0.31	0.44	-0.39	0.17	-0.57	0.04
AT1G07570	Protein kinase superfamily protein	0	chr1	2331170	2333738	11.0705	0.0808771	11.0403	0.0344889	11.0052	0.100485	10.5481	0.144878	10.6597	0.211059	10.4985	0.103117	11.0698	0.0628875	11.072	0.0361249	10.9245	0.137989	-0.03	0.79	-0.07	0.67	0.11	0.87	-0.05	0.89	0	0.99	-0.15	0.5
AT_1_-_1_2335850-2335954		0	chr1	2335853	2335957	4.66988	0.320769	5.07249	0.386337	4.91752	0.288662	4.96783	0.262749	4.78221	0.215798	4.9253	0.207436	4.8827	0.140586	4.99522	0.143405	4.90255	0.156476	0.4	0.5	0.25	0.63	-0.19	0.83	-0.04	0.95	0.11	0.71	0.02	0.96
AT1G07590	Tetratricopeptide repeat (TPR)-like superfamily protein	0	chr1	2336523	2339391	7.79553	0.156712	7.94127	0.129759	7.74846	0.0832881	8.09216	0.225316	7.94387	0.156465	7.92352	0.106741	7.96492	0.0659788	8.10377	0.363651	7.94055	0.242045	0.15	0.54	-0.05	0.84	-0.15	0.84	-0.17	0.72	0.14	0.81	-0.02	0.96
AT1G07600	metallothionein 1A	0	chr1	2338904	2339321	17.3013	0.0206071	17.2432	0.0286429	17.1898	0.0586218	17.038	0.26279	16.9858	0.261577	17.057	0.223616	17.2584	0.107948	17.0736	0.0847698	17.1393	0.228773	-0.06	0.21	-0.11	0.19	-0.05	0.96	0.02	0.98	-0.18	0.36	-0.12	0.75
AT1G07610	metallothionein 1C	1	chr1	2341542	2342123	15.2026	0.160587	14.8788	0.083283	15.0092	0.189922	15.2909	0.139425	14.9338	0.18047	15.3807	0.181641	15.237	0.196972	15.0497	0.179056	15.149	0.139763	-0.32	0.19	-0.19	0.5	-0.36	0.45	0.09	0.83	-0.19	0.64	-0.09	0.81
AT1G07615	GTP-binding protein Obg/CgtA	0	chr1	2342198	2344271	9.67894	0.0885963	9.7091	0.0547895	9.69325	0.0787583	9.61661	0.121877	9.66622	0.15031	9.67304	0.085605	9.51443	0.161881	9.58356	0.104947	9.56411	0.162946	0.03	0.83	0.01	0.93	0.05	0.92	0.06	0.84	0.07	0.81	0.05	0.89
AT1G07620	GTP-binding protein Obg/CgtA	0	chr1	2344390	2346842	8.88947	0.217161	8.7755	0.104982	8.75931	0.26339	9.2626	0.232518	9.19682	0.120374	9.42137	0.164423	9.45679	0.211173	9.32814	0.0431877	9.36243	0.137072	-0.11	0.7	-0.13	0.76	-0.07	0.93	0.16	0.77	-0.13	0.69	-0.09	0.81
AT1G07630	pol-like 5	1	chr1	2349097	2351692	9.41352	0.115208	9.47907	0.0808675	9.16894	0.0715955	9.81567	0.100295	9.7912	0.0413638	9.66767	0.045867	9.80975	0.156885	9.67236	0.0159801	9.43953	0.0876189	0.07	0.71	-0.24	0.19	-0.02	0.93	-0.15	0.47	-0.14	0.55	-0.37	0.21
AT1G07640	Dof-type zinc finger DNA-binding family protein	0	chr1	2354354	2356227	10.4665	0.170105	10.1029	0.145193	10.2597	0.135318	10.8716	0.211111	11.0309	0.148579	10.9398	0.229676	10.7599	0.151267	10.8597	0.134503	10.9748	0.075841	-0.36	0.22	-0.21	0.41	0.16	0.81	0.07	0.91	0.1	0.75	0.21	0.37
AT1G07650	Leucine-rich repeat transmembrane protein kinase	0	chr1	2359549	2366561	7.10883	0.131233	7.13979	0.164033	7.08963	0.0772945	6.8708	0.227526	6.93822	0.168953	7.57038	0.806987	7.48719	0.169289	7.27938	0.139452	7.25695	0.198373	0.03	0.92	-0.02	0.93	0.07	0.93	0.7	0.65	-0.21	0.52	-0.23	0.54
AT1G07645	dessication-induced 1VOC superfamily protein	0	chr1	2367437	2368385	5.64893	0.143949	5.54329	0.366069	5.45166	0.055733	5.52386	0.26007	5.59738	0.120514	5.47359	0.0940839	5.79294	0.483689	5.6719	0.449946	5.50634	0.219347	-0.11	0.84	-0.2	0.3	0.07	0.92	-0.05	0.93	-0.12	0.91	-0.29	0.72
AT1G07660	Histone superfamily protein	1	chr1	2368837	2369734	14.7231	0.158353	14.6747	0.128091	14.8226	0.0503686	14.3067	0.122189	14.3022	0.163074	14.2476	0.137018	13.9516	0.0618468	13.7755	0.110609	13.9509	0.105959	-0.05	0.86	0.1	0.61	0	0.99	-0.06	0.87	-0.18	0.35	0	1
AT1G07670	endomembrane-type CA-ATPase 4	0	chr1	2370052	2374545	9.02018	0.162316	9.07719	0.0548708	9.06519	0.0490434	9.46576	0.106382	9.40742	0.179217	9.64914	0.427797	9.61566	0.0765526	9.53411	0.152211	9.63896	0.0567428	0.06	0.8	0.05	0.84	-0.06	0.92	0.18	0.82	-0.08	0.75	0.02	0.88
AT1G07680		1	chr1	2376012	2377186	5.6447	0.308651	5.89448	0.229115	5.91908	0.0240043	6.11919	0.128094	5.74733	0.243433	6.00576	0.376428	5.94276	0.138735	5.73884	0.246154	5.80612	0.145904	0.25	0.58	0.27	0.44	-0.37	0.51	-0.11	0.88	-0.2	0.63	-0.14	0.64
AT1G07690		1	chr1	2378076	2379000	8.46175	0.257498	8.12727	0.0842471	7.58725	0.0913337	7.71323	0.358853	8.13687	0.159347	8.15447	0.368574	7.06341	0.372679	7.54196	0.105239	7.27167	0.19266	-0.33	0.31	-0.87	0.09	0.42	0.61	0.44	0.64	0.48	0.4	0.21	0.74
AT1G07700	Thioredoxin superfamily protein	1	chr1	2379647	2381362	10.1917	0.0796288	9.94875	0.0835541	10.0421	0.111545	9.90883	0.0714132	9.74071	0.0760542	9.97265	0.153898	9.61049	0.170314	9.56079	0.0938544	9.7479	0.12995	-0.24	0.15	-0.15	0.35	-0.17	0.43	0.06	0.84	-0.05	0.87	0.14	0.66
AT1G07705	NOT2 / NOT3 / NOT5 family	1	chr1	2381615	2386092	8.63209	0.138468	8.52077	0.060615	8.6486	0.111181	8.80914	0.268997	8.82992	0.233504	8.95833	0.1593	8.75528	0.145804	8.93802	0.258305	8.88332	0.104477	-0.11	0.53	0.02	0.95	0.02	0.99	0.15	0.8	0.18	0.68	0.13	0.62
AT1G07702	snoRNA	0	chr1	2382251	2382331	7.77124	0.115504	7.5097	0.116741	7.81453	0.145637	7.27609	0.165139	7.54072	0.26128	7.48446	0.0449383	7.2069	0.0796198	7.57116	0.157394	7.65106	0.144937	-0.26	0.22	0.04	0.87	0.26	0.71	0.21	0.5	0.36	0.21	0.44	0.13
AT1G07710	Ankyrin repeat family protein	0	chr1	2386275	2387986	7.30739	0.301328	7.5038	0.198032	7.45813	0.0742536	7.31594	0.31261	7.36768	0.178333	7.43581	0.0941833	7.56295	1.0603	7.19324	0.0992309	7.13838	0.152564	0.2	0.65	0.15	0.69	0.05	0.96	0.12	0.84	-0.37	0.82	-0.42	0.79
AT1G07720	3-ketoacyl-CoA synthase 3	0	chr1	2390655	2392453	5.59505	0.237969	5.49415	0.114114	5.37557	0.186746	6.00736	0.150936	5.92616	0.269032	5.9234	0.0721336	5.91494	0.198143	5.84295	0.1259	5.88812	0.19303	-0.1	0.76	-0.22	0.53	-0.08	0.92	-0.08	0.79	-0.07	0.84	-0.03	0.96
CUFF.3467		1	chr1	2393803	2394419	4.81254	0.210574	4.75914	0.124425	4.75509	0.141327	5.42171	1.35216	4.84899	0.215116	5.13294	0.286946	4.8627	0.158854	4.86728	0.236753	5.23197	0.677405	-0.05	0.88	-0.06	0.87	-0.57	0.87	-0.29	0.92	0	0.99	0.37	0.72
AT1G07725	exocyst subunit exo70 family protein H6	0	chr1	2394801	2397272	5.15926	0.130508	5.18473	0.288415	5.17142	0.178233	5.24561	0.170984	5.34713	0.145261	5.08699	0.243395	5.33433	0.160839	5.31948	0.239472	5.35255	0.305144	0.03	0.96	0.01	0.97	0.1	0.86	-0.16	0.78	-0.01	0.98	0.02	0.98
AT1G07728	other RNA	1	chr1	2395451	2397345	11.0726	0.145261	11.2095	0.0580905	11.2599	0.0237619	11.2046	0.0424123	11.2373	0.100776	11.2816	0.0574918	11.1488	0.0786257	11.1189	0.0667322	11.0484	0.072735	0.14	0.46	0.19	0.3	0.03	0.91	0.08	0.56	-0.03	0.85	-0.1	0.51
AT1G07740	Tetratricopeptide repeat (TPR)-like superfamily protein	0	chr1	2397442	2400508	11.8979	0.12806	11.7274	0.0387851	11.6642	0.115928	11.7069	0.264856	11.8029	0.0666687	11.6851	0.103223	11.0584	0.151401	10.8627	0.0960538	10.9767	0.0762199	-0.17	0.3	-0.23	0.28	0.1	0.89	-0.02	0.97	-0.2	0.45	-0.08	0.75
AT1G07730	Disease resistance-responsive (dirigent-like protein) family protein	0	chr1	2397527	2398696	10.785	0.121628	10.5659	0.159834	10.625	0.0911693	10.1707	0.566568	10.2789	0.293734	10.007	0.125918	9.04479	0.270562	8.81478	0.0707734	8.94599	0.193714	-0.22	0.36	-0.16	0.37	0.11	0.95	-0.16	0.88	-0.23	0.58	-0.1	0.85
AT1G07745	homolog of RAD51 D	0	chr1	2400589	2402873	8.64421	0.207729	8.32026	0.0591944	8.61968	0.138533	8.44843	0.233373	8.67226	0.153775	8.80182	0.167408	8.3678	0.165395	8.66178	0.0852809	8.521	0.0538623	-0.32	0.24	-0.02	0.95	0.22	0.74	0.35	0.5	0.29	0.3	0.15	0.54
AT1G07747	Bifunctional inhibitor/lipid-transfer protein/seed storage 2S albumin superfamily protein	1	chr1	2403558	2403845	5.12691	0.171183	5.12346	0.198283	5.01193	0.0822292	5.06515	0.137744	5.0488	0.0973549	4.93827	0.189034	4.99055	0.154703	4.9814	0.312507	4.90934	0.108577	0	0.99	-0.11	0.61	-0.02	0.97	-0.13	0.77	-0.01	0.99	-0.08	0.77
AT1G07750	RmlC-like cupins superfamily protein	0	chr1	2404037	2405943	12.5726	0.200946	12.7644	0.127738	12.7376	0.0213447	12.6535	0.182607	12.8036	0.131307	12.9626	0.0582891	12.5448	0.110823	12.8343	0.118993	12.9034	0.154275	0.19	0.5	0.16	0.48	0.15	0.79	0.31	0.4	0.29	0.25	0.36	0.24
AT_1_-_2_2407648-2407782		0	chr1	2407651	2407785	6.98445	0.172256	6.94704	0.127113	6.8194	0.216137	7.20595	0.349167	7.07825	0.142197	7.05429	0.0495535	7.14815	0.217809	6.95176	0.424957	7.01471	0.232281	-0.04	0.9	-0.17	0.61	-0.13	0.9	-0.15	0.82	-0.2	0.79	-0.13	0.78
AT1G07770	ribosomal protein S15A	0	chr1	2408203	2409580	13.146	0.119591	13.1475	0.0288921	13.1836	0.0830544	13.2081	0.0600727	13.1788	0.0918692	13.1324	0.0607613	12.9981	0.0922831	13.0818	0.096702	13.1465	0.0733022	0	0.99	0.04	0.85	-0.03	0.92	-0.08	0.63	0.08	0.68	0.15	0.38
AT1G07780	phosphoribosylanthranilate isomerase 1	0	chr1	2410056	2412677	10.4393	0.0938128	10.3354	0.110045	10.4487	0.155567	9.7623	0.175916	9.92104	0.250846	9.93052	0.181038	9.88305	0.280471	9.84595	0.21626	9.99892	0.195806	-0.1	0.54	0.01	0.97	0.16	0.84	0.17	0.72	-0.04	0.95	0.12	0.83
AT1G07790	Histone superfamily protein	1	chr1	2412980	2413708	10.9873	0.0529351	10.7737	0.0476182	10.9321	0.0803441	11.0127	0.118055	10.9083	0.105036	10.9151	0.0516741	10.4984	0.0311484	10.4534	0.102574	10.6172	0.0694608	-0.21	0.09	-0.06	0.63	-0.1	0.79	-0.1	0.68	-0.05	0.78	0.12	0.3
AT1G07795		1	chr1	2414286	2414967	5.27508	0.0900316	5.22824	0.0714924	5.19605	0.173613	5.13425	0.178645	5.07323	0.122732	5.44261	0.0897514	5.2869	0.514294	5.12855	0.211978	5.20847	0.131121	-0.05	0.75	-0.08	0.74	-0.06	0.92	0.31	0.42	-0.16	0.86	-0.08	0.93
AT1G07800	transposable element gene	1	chr1	2415041	2415970	5.46984	0.28262	5.40493	0.331867	5.69527	0.337376	5.18288	0.296203	5.1439	0.288782	5.21581	0.206708	5.31439	0.0927392	5.41074	0.264382	5.19057	0.152634	-0.06	0.92	0.23	0.67	-0.04	0.98	0.03	0.97	0.1	0.82	-0.12	0.64
AT1G07810	ER-type Ca2+-ATPase 1	1	chr1	2416265	2420757	11.7282	0.029902	11.81	0.0425871	11.7954	0.0198449	12.0096	0.149838	12.068	0.0326315	12.1472	0.0278576	12.2487	0.0922875	12.2248	0.10762	12.1654	0.153159	0.08	0.23	0.07	0.18	0.06	0.88	0.14	0.62	-0.02	0.92	-0.08	0.75
AT1G07820	Histone superfamily protein	0	chr1	2421216	2421947	13.2767	0.154222	13.2928	0.222457	13.4594	0.0456994	12.8475	0.176321	12.7887	0.178959	12.732	0.121639	12.3473	0.137165	12.1808	0.111161	12.2899	0.139424	0.02	0.97	0.18	0.34	-0.06	0.93	-0.12	0.77	-0.17	0.52	-0.06	0.85
AT1G07830	ribosomal protein L29 family protein	1	chr1	2422241	2423655	12.4348	0.151719	12.4414	0.126855	12.4597	0.0415407	12.4874	0.236725	12.5967	0.249181	12.6129	0.117536	12.4713	0.0491573	12.68	0.107776	12.558	0.283033	0.01	0.98	0.02	0.91	0.11	0.9	0.13	0.8	0.21	0.26	0.09	0.85
AT1G07840	Sas10/Utp3/C1D family	1	chr1	2424054	2426676	8.74385	0.065621	8.6014	0.0413327	8.54178	0.0871986	9.03929	0.068132	8.94977	0.142497	8.89765	0.115078	9.01831	0.126285	9.02619	0.217979	8.91556	0.0790105	-0.14	0.18	-0.2	0.19	-0.09	0.83	-0.14	0.56	0.01	0.99	-0.1	0.64
AT1G07850	Protein of unknown function (DUF604)	1	chr1	2426745	2428719	5.3151	0.203024	5.4761	0.126732	5.52686	0.152554	5.63183	0.121332	5.52279	0.332817	5.39168	0.113134	5.42359	0.117783	5.46629	0.090371	5.49382	0.378346	0.16	0.57	0.21	0.47	-0.11	0.91	-0.24	0.44	0.04	0.85	0.07	0.92
AT1G07870	Protein kinase superfamily protein	0	chr1	2428773	2432057	9.20743	0.104225	9.43705	0.0594581	9.15386	0.150263	9.57536	0.0792506	9.64605	0.108537	9.59371	0.101115	9.88408	0.153199	9.85009	0.179667	9.88244	0.0702158	0.23	0.17	-0.05	0.82	0.07	0.84	0.02	0.95	-0.03	0.93	0	1
AT1G07860		0	chr1	2428911	2429431	5.51784	0.125805	5.26247	0.214254	5.53209	0.218613	6.10889	0.303259	6.07434	0.434487	6.18431	0.291178	6.10322	0.396027	5.88281	0.365594	5.68089	0.17673	-0.26	0.39	0.01	0.97	-0.03	0.98	0.08	0.93	-0.22	0.79	-0.42	0.49
AT1G07880	Protein kinase superfamily protein	0	chr1	2434030	2435763	7.38313	0.336306	7.57846	0.100988	7.51309	0.189308	7.20564	0.173951	6.80888	0.106493	7.1593	0.150516	6.90204	0.0395994	6.73012	0.194449	6.85586	0.133986	0.2	0.65	0.13	0.79	-0.4	0.35	-0.05	0.92	-0.17	0.55	-0.05	0.83
AT1G07885		0	chr1	2436467	2436959	4.9919	0.187678	5.10198	0.259492	5.0034	0.145941	5.38351	0.234576	5.5091	0.15974	5.30868	0.149874	5.3329	0.265396	4.94389	0.439954	5.33157	0.222347	0.11	0.79	0.01	0.98	0.13	0.86	-0.07	0.89	-0.39	0.61	0	1
AT1G07890	ascorbate peroxidase 1	1	chr1	2437330	2439665	15.8134	0.272104	16.0082	0.112549	15.9721	0.0700661	15.6177	0.161111	15.5951	0.0502226	15.6267	0.0889902	15.5845	0.128017	15.6148	0.16875	15.7286	0.0573477	0.19	0.58	0.16	0.63	-0.02	0.97	0.01	0.98	0.03	0.93	0.14	0.47
AT1G07900	LOB domain-containing protein 1	1	chr1	2442622	2443632	5.50682	0.0668182	5.69468	0.240966	5.51269	0.099579	5.67568	0.0767194	5.58927	0.195941	5.52089	0.11103	5.73659	0.124503	5.68865	0.138686	5.96861	0.0951343	0.19	0.52	0.01	0.98	-0.09	0.87	-0.15	0.53	-0.05	0.87	0.23	0.32
AT1G07901		0	chr1	2443971	2444123	5.88784	0.27905	5.6563	0.0778033	5.86461	0.207438	5.6599	0.216597	5.83851	0.138149	5.80248	0.0743739	5.7768	0.0753151	5.80968	0.0457302	5.73529	0.349746	-0.23	0.5	-0.02	0.97	0.18	0.78	0.14	0.74	0.03	0.81	-0.04	0.95
AT1G07910	RNAligase	1	chr1	2445470	2454645	8.99522	0.0790641	9.16396	0.01871	9.16964	0.0822459	9.01578	0.1203	8.97858	0.117641	9.02868	0.122465	8.77315	0.0957436	8.71921	0.0865216	8.82386	0.168639	0.17	0.15	0.17	0.24	-0.04	0.94	0.01	0.97	-0.05	0.78	0.05	0.87
AT1G07920	GTP binding Elongation factor Tu family protein	1	chr1	2454846	2457321	17.1227	0.12853	17.0671	0.133256	17.2858	0.0227423	16.5001	0.0853983	16.6507	0.0678468	16.6635	0.13131	16.4784	0.078055	16.5527	0.0506925	16.8289	0.207846	-0.06	0.82	0.16	0.31	0.15	0.5	0.16	0.57	0.07	0.59	0.35	0.29
AT1G07930	GTP binding Elongation factor Tu family protein	1	chr1	2458244	2460790	9.79843	0.271397	9.80857	0.117464	9.78064	0.0634937	9.91501	0.0721999	9.51253	0.0407065	9.62289	0.0730709	9.84895	0.0911984	9.48033	0.10258	9.7227	0.166889	0.01	0.98	-0.02	0.97	-0.4	0.07	-0.29	0.2	-0.37	0.15	-0.13	0.65
AT_1_-_1_2462174-2462332		0	chr1	2462177	2462335	4.84314	0.151231	5.03599	0.102795	4.97053	0.206095	5.08595	0.215473	5.56201	1.12411	5.10309	0.0837569	4.98743	0.20199	5.01962	0.257157	4.94268	0.154933	0.19	0.38	0.13	0.68	0.48	0.87	0.02	0.97	0.03	0.96	-0.04	0.92
AT1G07940	GTP binding Elongation factor Tu family protein	0	chr1	2462953	2465504	16.4453	0.463046	16.4825	0.216965	16.6923	0.279915	15.9915	0.290714	15.964	0.0603764	16.1354	0.0811155	16.0254	0.0416116	15.8773	0.193559	16.1359	0.183132	0.04	0.96	0.25	0.71	-0.03	0.98	0.14	0.8	-0.15	0.62	0.11	0.69
AT1G07950	Surfeit locus protein 5 subunit 22 of Mediator complex	0	chr1	2465770	2467022	10.3732	0.158507	10.1019	0.0565357	10.1486	0.0574824	10.4468	0.132019	10.5372	0.120162	10.4916	0.108146	10.2256	0.143952	10.5712	0.113968	10.3992	0.0549155	-0.27	0.22	-0.22	0.28	0.09	0.85	0.04	0.89	0.35	0.24	0.17	0.42
AT1G07960	PDI-like 5-1	1	chr1	2467161	2469154	10.8503	0.145674	10.7462	0.136495	10.7364	0.0563399	11.1352	0.16141	11.1377	0.126423	11.1135	0.0882422	11.1176	0.127181	11.1714	0.140235	11.1799	0.12385	-0.1	0.67	-0.11	0.53	0	1	-0.02	0.96	0.05	0.86	0.06	0.82
AT1G07970		0	chr1	2469286	2472628	9.79028	0.0258256	9.79785	0.145179	9.8707	0.147665	9.69942	0.136401	9.66391	0.0836748	9.75944	0.086849	9.53672	0.143841	9.60314	0.172858	9.6689	0.0639103	0.01	0.97	0.08	0.65	-0.04	0.94	0.06	0.84	0.07	0.85	0.13	0.56
AT1G07980	nuclear factor Y, subunit C10	0	chr1	2473165	2474927	10.1222	0.113081	10.0763	0.120213	10.0724	0.0232387	10.0064	0.0564345	10.0803	0.0596613	10.0708	0.065246	10.2852	0.0979899	10.2974	0.166129	10.3118	0.122061	-0.05	0.84	-0.05	0.73	0.07	0.69	0.06	0.69	0.01	0.97	0.03	0.92
AT1G07985	Expressed protein	1	chr1	2475405	2476155	7.67368	0.668236	7.37242	0.270764	7.52491	0.485556	7.54607	0.457922	7.51833	0.343592	7.67791	0.202277	7.33477	0.159017	7.65291	0.223003	7.23899	0.188254	-0.3	0.74	-0.15	0.9	-0.03	0.99	0.13	0.89	0.32	0.42	-0.1	0.8
AT1G07990	SIT4 phosphatase-associated family protein	1	chr1	2477157	2483138	8.66994	0.10414	8.87837	0.0791901	8.74448	0.124784	9.03376	0.0997871	8.94036	0.0696575	9.02065	0.0806144	8.98297	0.167967	8.79452	0.0492333	8.78939	0.168664	0.21	0.22	0.07	0.71	-0.09	0.75	-0.01	0.96	-0.19	0.45	-0.19	0.57
AT1G08000	GATA transcription factor 10	0	chr1	2483240	2485109	8.44757	0.0975334	8.49622	0.0383803	8.31985	0.0664294	8.78161	0.03593	8.48048	0.126496	8.55428	0.18148	8.69013	0.117231	8.46575	0.205331	8.52133	0.129381	0.05	0.71	-0.13	0.36	-0.3	0.28	-0.23	0.5	-0.22	0.52	-0.17	0.49
AT1G08005		1	chr1	2485344	2485511	7.47184	0.176197	7.53873	0.335583	7.54776	0.112472	7.2829	0.256985	7.25849	0.236542	7.47502	0.114315	7.34216	0.10707	6.95421	0.208296	7.18053	0.126936	0.07	0.9	0.08	0.77	-0.02	0.98	0.19	0.72	-0.39	0.28	-0.16	0.49
AT1G08010	GATA transcription factor 11	0	chr1	2485906	2488027	8.72635	0.133192	8.72777	0.103547	8.72321	0.0479665	8.54626	0.239614	8.65558	0.188834	8.65169	0.104214	8.6002	0.118963	8.55458	0.228187	8.69629	0.168717	0	1	0	0.99	0.11	0.89	0.11	0.83	-0.05	0.92	0.1	0.75
AT1G08030	tyrosylprotein sulfotransferase	0	chr1	2489501	2493250	8.57808	0.0437084	8.72052	0.0526239	8.49925	0.0774407	8.8705	0.134099	8.68466	0.106171	8.78868	0.135002	8.59505	0.225378	8.5418	0.133807	8.50817	0.151618	0.14	0.15	-0.08	0.44	-0.19	0.61	-0.08	0.82	-0.05	0.9	-0.09	0.84
AT1G08032		1	chr1	2494123	2494315	5.46536	0.054656	5.3258	0.209636	5.55196	0.107129	5.69678	0.166139	5.53427	0.334978	5.671	0.265941	5.51096	0.181597	5.67358	0.357975	5.59568	0.120471	-0.14	0.59	0.09	0.53	-0.16	0.87	-0.03	0.97	0.16	0.79	0.08	0.8
AT1G08035		1	chr1	2494402	2495149	6.04599	0.249371	6.01607	0.137259	5.92481	0.128375	6.07098	0.0938226	6.08686	0.228883	6.02616	0.15831	5.94131	0.382312	6.02403	0.205369	6.00792	0.153715	-0.03	0.94	-0.12	0.72	0.02	0.98	-0.04	0.9	0.08	0.91	0.07	0.92
AT1G08040	Protein of unknown function (DUF707)	0	chr1	2495342	2498764	10.5557	0.194584	10.4428	0.119005	10.5563	0.0922228	10.567	0.0957559	10.4179	0.119292	10.597	0.138722	10.4749	0.120595	10.4944	0.1237	10.6327	0.115265	-0.11	0.69	0	1	-0.15	0.65	0.03	0.93	0.02	0.95	0.16	0.5
AT1G08050	Zinc finger (C3HC4-type RING finger) family protein	0	chr1	2498836	2501427	11.4179	0.145114	11.5272	0.219283	11.2613	0.170449	11.501	0.0871534	11.5461	0.0728196	11.4449	0.0579272	11.5958	0.128072	11.5101	0.084869	11.4752	0.0899884	0.11	0.74	-0.16	0.55	0.05	0.88	-0.06	0.77	-0.09	0.71	-0.12	0.59
AT1G08060	ATP-dependent helicase family protein	0	chr1	2501742	2511084	8.75819	0.186319	8.80181	0.116273	8.72745	0.111138	8.74385	0.105284	8.70595	0.0334166	8.78382	0.170005	8.84655	0.125078	8.65492	0.100824	8.65924	0.197545	0.04	0.89	-0.03	0.92	-0.04	0.9	0.04	0.92	-0.19	0.41	-0.19	0.58
AT1G08065	alpha carbonic anhydrase 5	0	chr1	2511647	2513454	5.72556	0.0986836	5.79144	0.258299	5.56363	0.175088	5.49617	0.0796591	5.54889	0.19167	5.68054	0.0552511	5.82023	0.452288	5.64973	0.173941	5.662	0.0651141	0.07	0.86	-0.16	0.49	0.05	0.93	0.18	0.33	-0.17	0.82	-0.16	0.82
AT1G08070	Tetratricopeptide repeat (TPR)-like superfamily protein	0	chr1	2514192	2516605	6.68649	0.18905	6.53597	0.0851228	6.69999	0.107719	6.57161	0.148637	6.58793	0.351976	6.562	0.171028	6.49095	0.315509	6.60344	0.208119	6.64971	0.230677	-0.15	0.54	0.01	0.97	0.02	0.99	-0.01	0.99	0.11	0.85	0.16	0.79
AT1G08080	alpha carbonic anhydrase 7	0	chr1	2516991	2518546	5.71511	0.181555	5.97602	0.246198	5.69795	0.131719	6.34171	0.334532	5.95171	0.371569	6.03633	0.179016	5.82747	0.28719	6.12156	0.166462	6.17211	0.300961	0.26	0.47	-0.02	0.96	-0.39	0.74	-0.31	0.66	0.29	0.54	0.34	0.56
AT_1_+_0_2520298-2520390		1	chr1	2520301	2520393	5.43691	0.261244	5.41849	0.125025	5.36731	0.0903735	5.28029	0.203425	5.13574	0.297146	5.42416	0.12361	5.44978	0.139215	5.23736	0.215112	5.27701	0.187749	-0.02	0.97	-0.07	0.85	-0.14	0.88	0.14	0.75	-0.21	0.57	-0.17	0.61
AT1G08090	nitrate transporter 2:1	1	chr1	2524076	2526164	15.4537	0.370685	15.3136	0.173585	15.6067	0.196625	14.1663	0.577003	14.0505	0.39335	13.316	0.487366	12.7103	0.274639	12.095	0.232676	12.3232	0.308674	-0.14	0.79	0.15	0.77	-0.12	0.95	-0.85	0.54	-0.62	0.27	-0.39	0.51
AT1G08100	nitrate transporter 2.2	0	chr1	2527170	2529120	5.69616	0.343333	5.82227	0.0835512	6.3752	0.447838	5.79259	0.569008	5.59435	0.369043	5.67991	0.298077	5.41764	0.189256	5.63366	0.28372	5.37483	0.348768	0.13	0.78	0.68	0.32	-0.2	0.91	-0.11	0.93	0.22	0.68	-0.04	0.95
AT1G08105	transposable element gene	0	chr1	2531695	2534786	6.55596	0.239976	6.35373	0.28307	6.57027	0.112909	6.5745	0.158263	6.444	0.139704	6.40007	0.123448	6.62498	0.237928	6.62827	0.10962	6.5131	0.15165	-0.2	0.65	0.01	0.97	-0.13	0.81	-0.17	0.63	0	0.99	-0.11	0.79
AT1G08110	lactoylglutathione lyase family protein / glyoxalase I family protein	1	chr1	2535328	2537931	12.9208	0.0266695	12.8679	0.115365	12.8762	0.0300178	12.9133	0.0830984	13.0319	0.058896	12.9506	0.145293	12.9074	0.0348975	13.0607	0.0865795	12.9776	0.0598195	-0.05	0.72	-0.04	0.35	0.12	0.58	0.04	0.91	0.15	0.28	0.07	0.47
AT1G08115	snRNA	0	chr1	2538076	2538237	14.9189	0.237018	15.0843	0.138163	15.0199	0.0673535	14.9503	0.361288	14.9746	0.226518	14.9921	0.160186	15.1736	0.135874	15.0048	0.0586774	15.0818	0.410478	0.17	0.62	0.1	0.74	0.02	0.99	0.04	0.96	-0.17	0.43	-0.09	0.9
AT1G08120		1	chr1	2538615	2539661	5.70433	0.0469791	5.75232	0.070527	5.8468	0.134798	5.36598	0.33493	5.30651	0.14975	5.35339	0.375994	5.48144	0.622637	5.55721	0.196281	5.47026	0.176784	0.05	0.64	0.14	0.39	-0.06	0.96	-0.01	0.99	0.08	0.95	-0.01	0.99
AT1G08125	S-adenosyl-L-methionine-dependent methyltransferases superfamily protein	0	chr1	2539614	2542334	9.3676	0.0610379	9.35153	0.0415907	9.32727	0.151738	9.10578	0.127788	9.20508	0.216274	9.24351	0.106404	9.05393	0.0894225	8.97737	0.134507	9.0846	0.0680663	-0.02	0.88	-0.04	0.86	0.1	0.88	0.14	0.65	-0.08	0.76	0.03	0.86
AT1G08130	DNA ligase 1	0	chr1	2542702	2547946	7.75898	0.080084	8.07429	0.0621163	7.91839	0.0978354	7.80903	0.0465741	7.84253	0.0811736	7.91485	0.107753	8.22513	0.099529	8.13053	0.226284	8.24099	0.149928	0.32	0.08	0.16	0.3	0.03	0.89	0.11	0.62	-0.09	0.8	0.02	0.96
AT1G08135	cation/H+ exchanger 6B	0	chr1	2548819	2551473	5.83689	0.0971281	5.87334	0.274369	5.92722	0.162342	5.79816	0.390813	5.8378	0.267387	5.72069	0.267846	5.72301	0.156634	5.67934	0.0813033	5.83556	0.283877	0.04	0.93	0.09	0.69	0.04	0.98	-0.08	0.94	-0.04	0.88	0.11	0.82
AT1G08140	cation/H+ exchanger 6A	0	chr1	2552036	2555161	5.25141	0.137688	5.23812	0.106601	5.2056	0.110082	5.1035	0.117644	5.06475	0.0816997	4.994	0.194356	5.00955	0.0552847	5.14698	0.133381	5.17453	0.110284	-0.01	0.96	-0.05	0.85	-0.04	0.92	-0.11	0.8	0.14	0.52	0.16	0.35
AT1G08150	Cation/hydrogen exchanger family protein	0	chr1	2556343	2559074	5.71395	0.0917007	5.6913	0.11741	5.87519	0.154645	5.30043	0.21586	5.92902	0.550471	5.24049	0.220365	5.33434	0.0744154	5.48172	0.409664	5.6433	0.23315	-0.02	0.92	0.16	0.44	0.63	0.62	-0.06	0.93	0.15	0.82	0.31	0.38
AT1G08160	Late embryogenesis abundant (LEA) hydroxyproline-rich glycoprotein family	0	chr1	2559487	2560403	11.3682	0.145086	11.374	0.12473	11.6346	0.0683948	11.4043	0.0785247	11.1338	0.107557	11.6109	0.237136	11.2531	0.172061	10.9327	0.130235	11.7174	0.120016	0.01	0.98	0.27	0.21	-0.27	0.33	0.21	0.65	-0.32	0.32	0.46	0.19
AT1G08165		0	chr1	2561627	2562148	5.21426	0.171242	5.11144	0.0898345	5.09301	0.372976	5.16617	0.124968	4.94276	0.2263	4.96952	0.258735	5.10597	0.226877	4.77067	0.196545	4.91136	0.191588	-0.1	0.66	-0.12	0.82	-0.22	0.71	-0.2	0.72	-0.34	0.44	-0.19	0.65
AT1G08170	Histone superfamily protein	0	chr1	2562941	2563672	4.96333	0.0792628	4.88531	0.265122	5.05426	0.0612321	4.99557	0.454255	5.00785	0.264159	5.08073	0.0690057	4.85663	0.256885	5.13075	0.233777	5.0433	0.123055	-0.08	0.83	0.09	0.43	0.01	0.99	0.09	0.93	0.27	0.59	0.19	0.65
AT1G08180		0	chr1	2564572	2565121	9.1461	0.171874	9.16072	0.118639	9.00126	0.148629	9.43398	0.163505	9.48571	0.0330262	9.38709	0.181074	9.21763	0.189417	9.32915	0.0957539	9.02059	0.0665923	0.01	0.96	-0.14	0.59	0.05	0.91	-0.05	0.93	0.11	0.73	-0.2	0.49
AT1G08190	vacuolar protein sorting 41	1	chr1	2567475	2573393	9.40505	0.19055	9.6338	0.0668263	9.63051	0.0736465	9.56721	0.0561983	9.3817	0.143502	9.53719	0.178644	9.67055	0.0765241	9.45055	0.149465	9.59452	0.0421101	0.23	0.35	0.23	0.35	-0.19	0.57	-0.03	0.94	-0.22	0.37	-0.08	0.54
AT1G08200	UDP-D-apiose/UDP-D-xylose synthase 2	0	chr1	2573848	2576714	9.35464	0.13731	9.64461	0.207281	9.60794	0.243048	9.03485	0.0393492	9.01882	0.114284	9.14399	0.0350184	8.61786	0.0872038	8.76864	0.0964235	8.90826	0.129498	0.29	0.33	0.25	0.43	-0.02	0.97	0.11	0.3	0.15	0.42	0.29	0.24
AT1G08210	Eukaryotic aspartyl protease family protein	0	chr1	2577020	2580669	10.9045	0.045715	10.8425	0.0310002	10.7549	0.0721995	11.0132	0.173663	11.0643	0.139816	11.0812	0.185761	11.0385	0.0793655	11.1672	0.107855	11.0197	0.0668239	-0.06	0.35	-0.15	0.2	0.05	0.93	0.07	0.89	0.13	0.51	-0.02	0.91
AT1G08220		0	chr1	2581022	2583323	6.21091	0.0319191	5.9697	0.0929639	6.04332	0.184352	5.68959	0.294492	5.432	0.297903	5.83946	0.348167	5.59415	0.159084	5.72163	0.0931395	5.81285	0.233916	-0.24	0.12	-0.17	0.44	-0.26	0.81	0.15	0.86	0.13	0.65	0.22	0.59
AT1G08230	Transmembrane amino acid transporter family protein	0	chr1	2583654	2586744	6.175	0.121136	6.21465	0.227995	6.05888	0.277866	6.69391	0.178333	6.532	0.0358585	6.63281	0.276798	6.82403	0.180851	6.52094	0.140376	6.65717	0.17705	0.04	0.92	-0.12	0.76	-0.16	0.69	-0.06	0.93	-0.3	0.37	-0.17	0.65
AT1G08250	arogenate dehydratase 6	0	chr1	2588857	2590301	10.1502	0.0934466	10.2389	0.0779586	10.1476	0.0557951	10.4866	0.141098	10.5447	0.284845	10.2577	0.0771427	10.4064	0.189845	10.5058	0.096099	10.5615	0.173234	0.09	0.54	0	0.99	0.06	0.95	-0.23	0.45	0.1	0.76	0.16	0.68
AT1G08260	DNA polymerase epsilon catalytic subunit	1	chr1	2590944	2606892	8.79212	0.099511	9.06989	0.0893522	9.00914	0.196205	8.65235	0.230842	8.83669	0.15099	8.89534	0.249869	12.4781	0.222538	12.1513	0.23808	12.422	0.198589	0.28	0.15	0.22	0.4	0.18	0.79	0.24	0.7	-0.33	0.49	-0.06	0.91
AT1G08270		0	chr1	2606269	2607507	7.94854	0.0801369	7.94145	0.0876604	7.92777	0.193885	7.73956	0.25098	7.78171	0.145116	7.92235	0.174506	8.29707	0.0809347	8.04702	0.130616	8.21321	0.0992056	-0.01	0.97	-0.02	0.95	0.04	0.96	0.18	0.75	-0.25	0.29	-0.08	0.65
AT1G08280	Glycosyltransferase family 29 (sialyltransferase) family protein	1	chr1	2608408	2609853	8.57131	0.0367881	8.28206	0.0535645	8.32068	0.0931194	8.55833	0.190403	8.41607	0.268625	8.40981	0.109973	8.42281	0.114737	8.30598	0.222172	8.42944	0.0552273	-0.29	0.05	-0.25	0.13	-0.14	0.87	-0.15	0.72	-0.12	0.76	0.01	0.98
AT1G08290	WIP domain protein 3	0	chr1	2609996	2613242	6.61457	0.0485627	6.77809	0.356021	6.27207	0.171491	7.57788	0.3789	7.15802	0.488321	6.9865	0.298396	7.41532	0.278995	7.29269	0.211103	7.51991	0.170304	0.16	0.71	-0.34	0.18	-0.42	0.79	-0.59	0.5	-0.12	0.82	0.1	0.84
AT1G08300	no vein-like	1	chr1	2614774	2618823	5.17076	0.0669818	5.36411	0.177446	5.17047	0.15932	5.40799	0.261645	5.45914	0.149276	5.51004	0.237565	5.43379	0.323978	5.22805	0.177924	5.22871	0.148787	0.19	0.39	0	1	0.05	0.95	0.1	0.88	-0.21	0.71	-0.21	0.7
AT1G08310	alpha/beta-Hydrolases superfamily protein	1	chr1	2618647	2620452	8.35196	0.339468	8.23602	0.0987433	8.27588	0.117138	8.77597	0.131958	9.21145	0.0687698	9.19927	0.196125	9.0008	0.116552	9.48057	0.2227	9.2107	0.249399	-0.12	0.8	-0.08	0.88	0.44	0.21	0.42	0.36	0.48	0.24	0.21	0.6
AT1G08315	ARM repeat superfamily protein	0	chr1	2620335	2621545	10.8564	0.104093	10.9103	0.0716113	10.8514	0.0545087	10.7004	0.212148	10.8701	0.168207	10.8888	0.0377147	10.9125	0.0450844	10.9673	0.185099	10.8266	0.112286	0.05	0.73	-0.01	0.98	0.17	0.8	0.19	0.63	0.05	0.85	-0.09	0.63
AT1G08320	bZIP transcription factor family protein	0	chr1	2621904	2627848	11.3776	0.0698929	11.2545	0.0672223	11.173	0.0851711	11.4095	0.089275	11.5203	0.162179	11.5601	0.167848	11.4775	0.0465911	11.4141	0.179994	11.1716	0.156296	-0.12	0.3	-0.2	0.19	0.11	0.82	0.15	0.67	-0.06	0.82	-0.31	0.24
AT1G08340	Rho GTPase activating protein with PAK-box/P21-Rho-binding domain	1	chr1	2631068	2632871	8.65368	0.0983823	8.70343	0.0869151	8.68411	0.175061	8.54581	0.140689	8.41322	0.140055	8.64562	0.117608	8.72884	0.1426	8.406	0.130416	8.45895	0.104501	0.05	0.77	0.03	0.92	-0.13	0.79	0.1	0.77	-0.32	0.28	-0.27	0.31
AT1G08350	Endomembrane protein 70 protein family	0	chr1	2632810	2635852	7.42819	0.273007	7.5614	0.176523	7.39018	0.0978861	7.28644	0.270694	6.9417	0.213429	7.32008	0.122703	7.29567	0.192562	7.23194	0.273018	7.19231	0.199527	0.13	0.74	-0.04	0.93	-0.34	0.64	0.03	0.96	-0.06	0.91	-0.1	0.81
AT1G08360	Ribosomal protein L1p/L10e family	1	chr1	2636011	2637915	16.0337	0.133887	16.0326	0.0763416	16.2057	0.106913	15.7483	0.21229	15.8878	0.118455	15.9463	0.137963	15.6686	0.0993258	15.9705	0.135607	15.9711	0.155132	0	1	0.17	0.39	0.14	0.82	0.2	0.67	0.3	0.25	0.3	0.28
AT1G08370	decapping 1	1	chr1	2638181	2640554	12.6537	0.140368	12.3059	0.103897	12.5638	0.0955942	12.2587	0.115896	12.6133	0.089343	12.4977	0.0965192	12.2317	0.238831	12.4149	0.164363	12.4794	0.0823485	-0.35	0.16	-0.09	0.66	0.35	0.27	0.24	0.41	0.18	0.68	0.25	0.49
AT1G08380	photosystem I subunit O	0	chr1	2640813	2641828	10.6838	0.207317	10.2477	0.166376	10.5418	0.175892	10.4726	0.344188	10.2231	0.1453	10.5915	0.133664	9.46986	0.288189	9.1999	0.209568	9.58935	0.239749	-0.44	0.21	-0.14	0.66	-0.25	0.79	0.12	0.87	-0.27	0.61	0.12	0.84
AT1G08390		1	chr1	2642214	2643285	8.84106	0.101558	8.80366	0.0861931	8.7704	0.0548717	8.78526	0.0411257	8.80652	0.15065	8.88809	0.10928	8.58022	0.244002	8.77528	0.137553	8.64668	0.0652236	-0.04	0.84	-0.07	0.6	0.02	0.96	0.1	0.63	0.2	0.64	0.07	0.87
AT1G08400	RINT-1 / TIP-1 family	0	chr1	2643330	2646035	8.14289	0.141225	8.35241	0.0345951	8.20648	0.0991386	8.71281	0.0791959	8.42415	0.189116	8.49101	0.0997352	8.72504	0.170309	8.47579	0.0837653	8.50959	0.137938	0.21	0.25	0.06	0.77	-0.29	0.49	-0.22	0.37	-0.25	0.37	-0.22	0.49
AT1G08410	P-loop containing nucleoside triphosphate hydrolases superfamily protein	1	chr1	2646189	2649379	8.31661	0.202002	8.5874	0.203441	8.28078	0.0888129	8.93406	0.186043	8.45588	0.220874	8.68294	0.120629	9.14483	0.126025	8.85455	0.15182	8.98942	0.191445	0.27	0.43	-0.04	0.91	-0.48	0.42	-0.25	0.53	-0.29	0.32	-0.16	0.64
AT1G08420	BRI1 suppressor 1 (BSU1)-like 2	1	chr1	2649537	2657120	10.1962	0.130867	10.3208	0.0944762	10.5183	0.0872668	10.3259	0.195783	10.3454	0.150563	10.5462	0.284065	10.5405	0.198564	10.2587	0.259448	10.4703	0.180267	0.12	0.51	0.32	0.17	0.02	0.98	0.22	0.73	-0.28	0.56	-0.07	0.87
AT1G08430	aluminum-activated malate transporter 1	1	chr1	2658716	2661029	9.78572	0.222115	9.7012	0.185234	9.89623	0.208809	9.38228	0.413984	9.76596	0.233608	9.98593	0.141128	9.03831	0.330979	9.15377	0.0455599	9.67737	0.200094	-0.08	0.83	0.11	0.77	0.38	0.73	0.6	0.46	0.12	0.82	0.64	0.28
AT1G08440	Aluminium activated malate transporter family protein	1	chr1	2663027	2665343	5.62774	0.274425	5.53227	0.199782	5.40754	0.0990485	6.24119	0.812236	5.37926	0.357588	6.29274	1.18068	5.55984	0.332491	5.27388	0.21141	5.44418	0.0679279	-0.1	0.84	-0.22	0.51	-0.86	0.66	0.05	0.99	-0.29	0.63	-0.12	0.82
AT_1_+_2_2667237-2667380		1	chr1	2667240	2667383	5.29338	0.0817904	5.18373	0.298668	5.19284	0.138614	5.54134	0.17297	5.44119	0.169384	5.76848	0.166718	5.59892	0.281631	5.4923	0.286029	5.51521	0.457914	-0.11	0.79	-0.1	0.59	-0.1	0.87	0.23	0.61	-0.11	0.87	-0.08	0.93
AT1G08450	calreticulin 3	0	chr1	2667798	2671892	9.26645	0.0985459	9.20689	0.124682	9.12559	0.249193	8.99053	0.254503	9.20272	0.366554	9.20405	0.187649	8.8935	0.133895	9.13767	0.120159	9.08657	0.0432857	-0.06	0.77	-0.14	0.66	0.21	0.85	0.21	0.72	0.24	0.36	0.19	0.35
AT1G08460	histone deacetylase 8	1	chr1	2672451	2674628	10.1272	0.114615	9.9351	0.0737147	9.94845	0.096377	10.1278	0.134551	10.5109	0.153214	10.3765	0.165768	10.2017	0.157693	10.7341	0.116204	10.4105	0.0412202	-0.19	0.26	-0.18	0.32	0.38	0.37	0.25	0.52	0.53	0.14	0.21	0.37
AT1G08465	Plant-specific transcription factor YABBY family protein	1	chr1	2675813	2679781	5.52207	0.11098	5.59362	0.0967346	5.31041	0.14945	5.47526	0.0646934	5.60026	0.0710837	5.59923	0.346931	5.65044	0.40713	5.53605	0.175158	5.54158	0.152572	0.07	0.69	-0.21	0.34	0.12	0.53	0.12	0.85	-0.11	0.87	-0.11	0.88
AT1G08470	strictosidine synthase-like 3	0	chr1	2682127	2684100	10.3872	0.0446269	10.3033	0.0179929	10.3796	0.126145	10.3516	0.1358	10.5919	0.117801	10.478	0.0765043	10.514	0.0775729	10.6862	0.0694673	10.6245	0.0870731	-0.08	0.19	-0.01	0.97	0.24	0.52	0.13	0.66	0.17	0.28	0.11	0.5
AT1G08480		1	chr1	2684234	2685621	14.0257	0.12661	14.0089	0.079073	13.9833	0.0880198	14.0127	0.0941763	14.0613	0.203986	14.0773	0.121579	13.9267	0.0576288	14.0653	0.0458002	14.0567	0.0699959	-0.02	0.94	-0.04	0.84	0.05	0.94	0.06	0.82	0.14	0.24	0.13	0.33
AT1G08490	chloroplastic NIFS-like cysteine desulfurase	0	chr1	2685659	2688595	9.9076	0.0908436	9.75035	0.145188	9.7939	0.0853299	9.8782	0.060114	9.97412	0.0897735	9.99421	0.139988	9.90634	0.0296914	10.0479	0.101702	9.93173	0.176741	-0.16	0.44	-0.11	0.43	0.1	0.69	0.12	0.68	0.14	0.36	0.03	0.94
AT1G08500	early nodulin-like protein 18	1	chr1	2689016	2690045	8.49761	0.169615	8.57839	0.144802	8.65047	0.0680398	8.75839	0.204632	8.81597	0.155986	8.89426	0.12737	8.42608	0.193232	8.58931	0.0717478	8.78531	0.0663251	0.08	0.78	0.15	0.47	0.06	0.94	0.14	0.76	0.16	0.59	0.36	0.26
AT1G08510	fatty acyl-ACP thioesterases B	0	chr1	2691080	2694377	8.90925	0.095863	9.00974	0.181614	8.99941	0.143636	9.39947	0.106273	9.35145	0.130197	9.46172	0.066201	9.48823	0.117396	9.47048	0.0661126	9.66706	0.133732	0.1	0.69	0.09	0.66	-0.05	0.92	0.06	0.79	-0.02	0.94	0.18	0.48
AT_1_-_2_2695528-2695635		0	chr1	2695525	2695632	5.63961	0.244251	5.29456	0.137195	5.50442	0.168048	5.33257	0.0990158	5.41304	0.219029	5.37139	0.174623	5.34546	0.309085	5.56906	0.169776	5.45627	0.123843	-0.35	0.31	-0.14	0.71	0.08	0.9	0.04	0.93	0.22	0.68	0.11	0.83
AT1G08520	ALBINA 1	1	chr1	2696412	2700959	9.91569	0.115077	9.88679	0.0514002	9.70724	0.070607	10.042	0.212693	10.1842	0.220515	10.1487	0.155262	10.0939	0.125827	10.1989	0.104017	9.88348	0.14914	-0.03	0.87	-0.21	0.23	0.14	0.86	0.11	0.83	0.1	0.67	-0.21	0.44
AT1G08530		1	chr1	2701226	2703091	8.66244	0.0396177	8.63833	0.143813	8.79651	0.157216	8.46661	0.0699308	8.61789	0.149616	8.56302	0.0472724	8.4784	0.109445	8.62649	0.090423	8.68625	0.139275	-0.02	0.91	0.13	0.47	0.15	0.68	0.1	0.53	0.15	0.47	0.21	0.41
AT1G08540	RNApolymerase sigma subunit 2	1	chr1	2703336	2706845	8.27474	0.108539	8.03813	0.149077	8.20324	0.0984621	8.35693	0.240046	8.49163	0.284813	8.57434	0.213711	8.68405	0.172617	8.94989	0.176565	8.68212	0.117135	-0.24	0.29	-0.07	0.69	0.13	0.89	0.22	0.72	0.27	0.45	0	1
AT1G08550	non-photochemical quenching 1	1	chr1	2706924	2709531	5.93441	0.126164	5.75186	0.193085	5.70454	0.0812915	6.16444	0.234769	6.14814	0.266831	6.09579	0.206738	6.7506	0.819898	6.32317	0.0885454	6.13818	0.192829	-0.18	0.5	-0.23	0.24	-0.02	0.99	-0.07	0.91	-0.43	0.73	-0.61	0.62
AT1G08560	syntaxin of plants 111	0	chr1	2709632	2710912	11.0467	0.25179	11.2513	0.0884214	10.9836	0.0878372	10.8371	0.215126	10.8477	0.232334	10.8262	0.189563	9.90474	0.0770993	10.223	0.103344	10.0963	0.21144	0.2	0.52	-0.06	0.86	0.01	0.99	-0.01	0.99	0.32	0.16	0.19	0.55
AT1G08570	atypical CYS HIS rich thioredoxin 4	1	chr1	2712883	2714734	13.0353	0.202473	13.2283	0.155902	13.1051	0.0810744	13.06	0.119179	12.9702	0.180038	13.1377	0.233246	13.1868	0.163713	13.1441	0.104253	12.9597	0.0832456	0.19	0.52	0.07	0.8	-0.09	0.87	0.08	0.88	-0.04	0.89	-0.23	0.38
AT1G08580		0	chr1	2715079	2716404	11.1845	0.180093	11.2665	0.127726	11.1107	0.0336124	11.2265	0.117113	10.8646	0.184735	11.0234	0.08449	11.2152	0.087534	10.949	0.134465	11.1701	0.0736504	0.08	0.77	-0.07	0.75	-0.36	0.42	-0.2	0.45	-0.27	0.28	-0.05	0.79
AT1G08590	Leucine-rich receptor-like protein kinase family protein	1	chr1	2718778	2722221	9.80273	0.298795	9.97812	0.128843	9.89972	0.189664	10.1672	0.278488	10.1533	0.103172	10.2185	0.069852	9.21466	0.0668943	9.49827	0.0579462	9.70822	0.0995667	0.18	0.66	0.1	0.84	-0.01	0.99	0.05	0.93	0.28	0.12	0.49	0.06
AT1G08592		0	chr1	2718875	2721676	5.78911	0.151608	5.89846	0.172495	5.90626	0.174655	5.6266	0.141184	5.75576	0.173628	5.72701	0.111095	5.53895	0.341501	5.5243	0.235002	5.69803	0.114914	0.11	0.7	0.12	0.67	0.13	0.82	0.1	0.77	-0.01	0.99	0.16	0.77
AT1G08600	P-loop containing nucleoside triphosphate hydrolases superfamily protein	1	chr1	2723824	2733613	9.76405	0.231135	9.93301	0.0765505	9.92124	0.0536662	9.96412	0.128637	9.84404	0.122895	10.0567	0.0306727	10.1272	0.169427	9.90534	0.107934	10.0996	0.270727	0.17	0.56	0.16	0.57	-0.12	0.79	0.09	0.71	-0.22	0.44	-0.03	0.96
AT1G08610	Pentatricopeptide repeat (PPR) superfamily protein	0	chr1	2733657	2735819	8.27588	0.124009	8.43686	0.0788478	8.22551	0.051219	8.49802	0.176293	8.19438	0.135401	8.39149	0.110818	8.47226	0.124072	8.28641	0.141361	8.41592	0.289002	0.16	0.36	-0.05	0.77	-0.3	0.5	-0.11	0.78	-0.19	0.5	-0.06	0.91
AT1G08620	Transcription factor jumonji (jmj) family protein / zinc finger (C5HC2 type) family protein	1	chr1	2736774	2743758	9.91311	0.109119	10.038	0.0763993	9.99693	0.111293	10.1235	0.128796	10.0847	0.0531708	10.0802	0.0706393	9.93925	0.0383416	9.97259	0.178847	9.85127	0.0588355	0.12	0.43	0.08	0.65	-0.04	0.92	-0.04	0.88	0.03	0.91	-0.09	0.38
AT1G08630	threonine aldolase 1	0	chr1	2743761	2747967	9.69338	0.924618	9.03976	0.536521	8.94722	0.734197	9.60773	0.361356	10.1499	0.7228	9.75415	0.225353	9.83649	0.262468	10.0545	0.17435	9.79726	0.265884	-0.65	0.61	-0.75	0.59	0.54	0.79	0.15	0.86	0.22	0.65	-0.04	0.95
AT1G08640	Chloroplast J-like domain 1	0	chr1	2748398	2751278	6.19964	0.0804068	6.16883	0.17714	6.08515	0.136891	6.61101	0.306828	6.38941	0.0481448	6.41152	0.10456	6.70191	0.120721	6.43654	0.104423	6.49081	0.138375	-0.03	0.91	-0.11	0.53	-0.22	0.77	-0.2	0.74	-0.27	0.28	-0.21	0.42
AT1G08650	phosphoenolpyruvate carboxylase kinase 1	1	chr1	2752154	2753703	8.90294	0.173075	9.09638	0.0771402	9.18308	0.0486533	9.51954	0.130656	9.08335	0.203509	9.52368	0.177272	9.20048	0.151636	9.18471	0.0436218	9.2377	0.261735	0.19	0.39	0.28	0.23	-0.44	0.39	0	0.99	-0.02	0.96	0.04	0.95
AT1G08660	MALE GAMETOPHYTE DEFECTIVE 2	0	chr1	2757041	2759794	10.03	0.148077	9.57551	0.165455	10.1068	0.216254	9.25021	0.406647	9.74734	0.350568	9.71755	0.136509	8.93836	0.257637	9.5078	0.254513	9.49577	0.223635	-0.45	0.16	0.08	0.82	0.5	0.68	0.47	0.55	0.57	0.3	0.56	0.28
AT1G08670	ENTH/VHS family protein	0	chr1	2760346	2761573	10.7033	0.191637	10.5863	0.146338	10.4479	0.0919711	10.7633	0.276368	10.8939	0.122724	10.6831	0.20815	10.8623	0.118251	10.7841	0.24273	10.547	0.213226	-0.12	0.69	-0.26	0.32	0.13	0.87	-0.08	0.91	-0.08	0.85	-0.32	0.37
AT1G08680	ARF GAP-like zinc finger-containing protein ZIGA4	1	chr1	2762584	2768967	11.4892	0.111839	11.4466	0.0750663	11.4492	0.065022	11.4919	0.201749	11.5525	0.155056	11.644	0.0757673	11.5674	0.109022	11.5667	0.120918	11.5336	0.185012	-0.04	0.81	-0.04	0.81	0.06	0.93	0.15	0.71	0	1	-0.03	0.93
AT1G08695	SCR-like 3	0	chr1	2769056	2769483	5.20294	0.237819	5.11082	0.274562	5.23438	0.0579772	5.41145	0.399563	4.93646	0.324955	5.19636	0.266023	5.03727	0.240304	5.28693	0.28775	5.38236	0.398916	-0.09	0.85	0.03	0.93	-0.47	0.68	-0.22	0.81	0.25	0.66	0.35	0.61
AT1G08700	Presenilin-1	0	chr1	2769815	2771477	10.6867	0.0397174	10.7432	0.162935	10.7154	0.0462909	10.6327	0.200135	10.6184	0.165028	10.5894	0.153588	10.6436	0.110329	10.5355	0.139521	10.5909	0.124872	0.06	0.8	0.03	0.7	-0.01	0.99	-0.04	0.94	-0.11	0.69	-0.05	0.84
AT1G08710	F-box family protein	1	chr1	2771633	2773460	6.93993	0.0262255	6.69724	0.199639	6.6875	0.0896063	6.90191	0.212731	6.95098	0.281232	7.04176	0.129872	7.14729	0.335686	7.0275	0.112925	6.82853	0.0820496	-0.24	0.32	-0.25	0.12	0.05	0.96	0.14	0.76	-0.12	0.83	-0.32	0.51
AT1G08720	Protein kinase superfamily protein	1	chr1	2774030	2779297	8.95733	0.0599781	9.17209	0.0556064	9.1191	0.108921	9.2478	0.167595	9.23342	0.0962104	9.22968	0.077517	9.33358	0.0888861	9.24698	0.114497	9.25562	0.0428991	0.21	0.11	0.16	0.29	-0.01	0.98	-0.02	0.97	-0.09	0.69	-0.08	0.59
AT1G08730	Myosin family protein with Dil domain	1	chr1	2779963	2788447	6.70325	0.087145	6.55276	0.0942378	6.56467	0.0430158	6.65304	0.350433	6.72142	0.236125	6.84139	0.287838	6.25405	0.304763	6.3371	0.406061	6.40128	0.0648947	-0.15	0.33	-0.14	0.26	0.07	0.96	0.19	0.82	0.08	0.92	0.15	0.75
AT1G08740	transposable element gene	0	chr1	2795643	2800081	6.06343	0.0971139	6.1057	0.212912	6.30667	0.162153	5.98936	0.236027	6.11599	0.243197	6.2714	0.636753	7.17032	2.05076	6.15906	0.258471	5.98963	0.175307	0.04	0.9	0.24	0.29	0.13	0.89	0.28	0.82	-1.01	0.75	-1.18	0.7
AT1G08750	Peptidase C13 family	1	chr1	2801067	2804537	10.3046	0.0641253	10.1946	0.0778441	10.2039	0.135693	10.3195	0.175288	10.4459	0.23858	10.4348	0.154241	10.1288	0.167322	10.442	0.216893	10.2954	0.125569	-0.11	0.36	-0.1	0.56	0.13	0.87	0.12	0.79	0.31	0.43	0.17	0.58
AT1G08760	Plant protein of unknown function (DUF936)	1	chr1	2805371	2808621	8.97482	0.154288	8.96987	0.105051	8.96532	0.116974	8.95335	0.0411241	9.04135	0.0724281	9.01646	0.0800571	8.85178	0.0488226	8.91915	0.0848234	8.79344	0.129624	0	0.99	-0.01	0.98	0.09	0.62	0.06	0.71	0.07	0.65	-0.06	0.78
AT1G08770	prenylated RAB acceptor 1.E	1	chr1	2808883	2809747	11.6678	0.0642586	11.9254	0.121139	11.7473	0.0722128	11.7559	0.0986814	11.5941	0.0890226	11.7662	0.0585166	11.8123	0.089841	11.5365	0.0837168	11.6224	0.106524	0.26	0.17	0.08	0.48	-0.16	0.56	0.01	0.97	-0.28	0.18	-0.19	0.35
AT1G08780	ABI3-interacting protein 3	0	chr1	2809778	2811191	11.78	0.125249	11.5337	0.131291	11.6951	0.0699488	11.473	0.0992917	11.621	0.0481639	11.4864	0.0420624	11.1134	0.182766	11.3623	0.116534	11.3258	0.082483	-0.25	0.27	-0.08	0.62	0.15	0.51	0.01	0.96	0.25	0.43	0.21	0.45
AT1G08790	Protein of unknown function (DUF1685)	1	chr1	2811989	2812646	8.62747	0.0710971	8.80825	0.252326	8.52687	0.180811	9.08531	0.247988	9.03591	0.184904	8.81379	0.0800778	9.087	0.145165	8.7644	0.320065	8.99508	0.276511	0.18	0.56	-0.1	0.67	-0.05	0.96	-0.27	0.57	-0.32	0.53	-0.09	0.85
AT1G08800	Protein of unknown function, DUF593	0	chr1	2813061	2818008	11.2999	0.133459	11.3687	0.159424	11.1332	0.0880903	11.1011	0.210951	10.9262	0.140111	10.8956	0.148733	10.8068	0.0814797	10.5605	0.165921	10.5192	0.0830239	0.07	0.8	-0.17	0.37	-0.17	0.78	-0.21	0.67	-0.25	0.36	-0.29	0.15
AT1G08810	myb domain protein 60	0	chr1	2819065	2820395	6.23938	0.0429965	6.36001	0.0941006	5.89668	0.128459	6.15789	0.156252	6.40238	0.259606	6.23953	0.28829	6.04531	0.129209	6.3795	0.0766001	5.98452	0.240311	0.12	0.33	-0.34	0.13	0.24	0.73	0.08	0.9	0.33	0.19	-0.06	0.89
AT1G08820	vamp/synaptobrevin-associated protein 27-2	0	chr1	2821552	2825275	12.5332	0.172384	12.5786	0.0333647	12.5283	0.0773206	12.5521	0.072002	12.5847	0.100911	12.5932	0.105825	12.4353	0.145193	12.5093	0.0682838	12.4407	0.140729	0.05	0.85	0	0.99	0.03	0.92	0.04	0.87	0.07	0.76	0.01	0.99
AT1G08830	copper/zinc superoxide dismutase 1	1	chr1	2827061	2829315	11.076	0.136219	11.3988	0.0419405	11.2487	0.063403	11.011	0.130298	11.1363	0.104672	11.0955	0.0979538	10.9169	0.0629457	11.2274	0.1586	11.0168	0.0845974	0.32	0.13	0.17	0.33	0.13	0.75	0.08	0.78	0.31	0.25	0.1	0.5
AT1G08840	DNA replication helicase, putative	0	chr1	2829105	2838469	6.3145	0.0873414	6.40031	0.134386	6.35315	0.078255	6.15601	0.376372	6.1684	0.0123476	6.03955	0.261884	6.30259	0.0656802	6.23583	0.203625	6.2508	0.171545	0.09	0.66	0.04	0.8	0.01	0.99	-0.12	0.9	-0.07	0.84	-0.05	0.86
AT1G08845	Ribosomal L18p/L5e family protein	1	chr1	2838789	2840994	9.59221	0.141942	9.74439	0.124686	9.66393	0.0615609	9.57692	0.0458488	9.40519	0.0521858	9.49867	0.0513485	9.77205	0.0560826	9.60747	0.145417	9.60195	0.0813047	0.15	0.5	0.07	0.7	-0.17	0.26	-0.08	0.53	-0.16	0.46	-0.17	0.26
AT1G08860	Calcium-dependent phospholipid-binding Copine family protein	1	chr1	2842153	2846138	6.11011	0.198187	6.34739	0.408511	6.61803	0.325627	6.33491	0.192004	6.16215	0.201076	5.89871	0.329108	6.00072	0.355204	5.99317	0.20651	6.21463	0.288442	0.24	0.67	0.51	0.28	-0.17	0.81	-0.44	0.53	-0.01	0.99	0.21	0.75
AT1G08880	Histone superfamily protein	0	chr1	2846949	2847800	13.2366	0.160482	13.3329	0.0981559	13.2666	0.0308324	13.227	0.157075	13.2564	0.154333	13.2318	0.201904	12.9078	0.145682	12.9572	0.217385	12.9098	0.0690877	0.1	0.68	0.03	0.9	0.03	0.97	0	0.99	0.05	0.91	0	1
AT1G08890	Major facilitator superfamily protein	1	chr1	2848348	2852270	8.6847	0.156154	8.92367	0.106074	8.56699	0.114286	8.50933	0.174072	8.31244	0.203796	8.47964	0.199027	7.7441	0.189286	7.75276	0.138427	7.63367	0.263321	0.24	0.3	-0.12	0.6	-0.2	0.76	-0.03	0.96	0.01	0.99	-0.11	0.83
AT1G08900	Major facilitator superfamily protein	1	chr1	2852454	2855779	8.06976	0.177167	8.17594	0.183652	8.12954	0.195446	8.437	0.282653	8.66292	0.253356	8.63447	0.159415	8.5983	0.185919	8.79568	0.0930433	8.32769	0.226595	0.11	0.74	0.06	0.87	0.23	0.82	0.2	0.75	0.2	0.52	-0.27	0.51
AT1G08910	zinc ion binding;zinc ion binding	1	chr1	2856227	2861170	7.23595	0.222118	7.16323	0.107361	7.24002	0.165763	7.70421	0.102428	7.5181	0.236445	7.69299	0.248681	8.25657	0.195841	8.4095	0.0246257	8.17128	0.0583519	-0.07	0.83	0	0.99	-0.19	0.76	-0.01	0.99	0.15	0.6	-0.09	0.78
AT1G08920	ERD (early response to dehydration) six-like 1	1	chr1	2867259	2870656	11.7908	0.232602	11.6822	0.207803	12.1768	0.155246	11.6397	0.224851	12.0552	0.330854	12.2815	0.122287	12.1207	0.11746	12.044	0.195852	12.4037	0.0820061	-0.11	0.79	0.39	0.27	0.42	0.63	0.64	0.24	-0.08	0.83	0.28	0.22
AT1G08930	Major facilitator superfamily protein	1	chr1	2873465	2877270	15.1888	0.0752267	15.2579	0.0511757	15.2012	0.0700623	14.9634	0.157067	14.9614	0.182301	15.0112	0.0807778	15.0815	0.133832	14.9635	0.138582	14.9118	0.0837309	0.07	0.52	0.01	0.93	0	1	0.05	0.89	-0.12	0.69	-0.17	0.44
AT1G08940	Phosphoglycerate mutase family protein	1	chr1	2877692	2879169	12.0281	0.131856	12.039	0.211662	11.7972	0.255952	12.2819	0.0634147	12.0845	0.030024	11.9288	0.165717	12.2291	0.117891	12.0622	0.140113	11.9016	0.044835	0.01	0.98	-0.23	0.49	-0.2	0.22	-0.35	0.31	-0.17	0.53	-0.33	0.14
AT1G08960	cation exchanger 11	1	chr1	2879642	2882231	8.98878	0.0439342	8.95374	0.102289	9.03053	0.113948	9.2403	0.145886	9.20215	0.0596846	9.35769	0.166986	9.1163	0.142169	9.09756	0.251038	9.24286	0.121267	-0.04	0.81	0.04	0.79	-0.04	0.93	0.12	0.78	-0.02	0.97	0.13	0.64
AT1G08970	nuclear factor Y, subunit C9	1	chr1	2882524	2884337	12.077	0.0579986	12.1069	0.0790999	12.0612	0.0502182	12.0461	0.154932	12.0137	0.0465477	12.0377	0.11944	12.1541	0.0766995	11.9578	0.119344	12.0886	0.154006	0.03	0.82	-0.02	0.88	-0.03	0.94	-0.01	0.99	-0.2	0.35	-0.07	0.8
AT1G08980	amidase 1	1	chr1	2884411	2886620	9.00593	0.140688	9.11007	0.0826204	8.83619	0.138022	9.5001	0.171362	9.53951	0.130486	9.67073	0.224277	9.63087	0.0903223	9.69382	0.204989	9.48773	0.193435	0.1	0.59	-0.17	0.46	0.04	0.95	0.17	0.75	0.06	0.86	-0.14	0.65
AT1G08985	AP2/B3-like transcriptional factor family protein	1	chr1	2887285	2887706	5.30603	0.271703	5.25015	0.0321312	5.19763	0.148929	5.64086	0.249253	5.65043	0.214655	5.67508	0.148344	5.68624	0.258719	5.28987	0.120652	5.69105	0.612962	-0.06	0.88	-0.11	0.78	0.01	0.99	0.03	0.96	-0.4	0.35	0	1
AT1G08990	plant glycogenin-like starch initiation protein 5	1	chr1	2888753	2890959	8.38671	0.0676576	8.4284	0.147265	8.24845	0.142956	8.75693	0.13084	8.69968	0.222899	8.80863	0.215223	8.96315	0.10312	8.75668	0.188581	8.77584	0.180635	0.04	0.85	-0.14	0.45	-0.06	0.94	0.05	0.92	-0.21	0.51	-0.19	0.53
AT1G09000	NPK1-related protein kinase 1	1	chr1	2891037	2895182	9.51309	0.146521	9.52412	0.0652755	9.37616	0.0792468	9.77762	0.0703055	9.62679	0.135686	9.66533	0.11332	9.95979	0.0797755	9.77952	0.0999944	9.77207	0.0977982	0.01	0.97	-0.14	0.48	-0.15	0.65	-0.11	0.65	-0.18	0.34	-0.19	0.32
AT1G09010	glycoside hydrolase family 2 protein	0	chr1	2895166	2899384	10.2927	0.125121	10.2505	0.0168367	10.3471	0.0569145	10.2184	0.15618	10.4968	0.0903725	10.4784	0.113147	10.2721	0.0820383	10.5773	0.0596339	10.3332	0.119667	-0.04	0.8	0.05	0.75	0.28	0.45	0.26	0.47	0.31	0.13	0.06	0.78
AT1G09020	homolog of yeast sucrose nonfermenting 4	0	chr1	2899914	2904815	10.6318	0.0668585	10.62	0.131961	10.6651	0.131067	10.4646	0.0751392	10.3752	0.233957	10.4316	0.329175	10.4867	0.0852343	10.1275	0.054078	10.2593	0.0801476	-0.01	0.96	0.03	0.87	-0.09	0.89	-0.03	0.97	-0.36	0.11	-0.23	0.23
AT1G09026		1	chr1	2907124	2907279	4.82778	0.216027	4.75099	0.324185	4.85625	0.025598	4.75012	0.156718	4.965	0.375045	4.94556	0.0591355	4.85413	0.0147845	5.14969	0.317012	4.88617	0.0705012	-0.08	0.89	0.03	0.93	0.21	0.84	0.2	0.52	0.3	0.52	0.03	0.77
AT_1_-_1_2908100-2908198		0	chr1	2908097	2908195	5.77263	0.173394	5.8472	0.225164	6.14308	0.319222	6.60006	0.487147	6.32843	0.196525	6.11382	0.222662	6.52543	0.275233	6.34244	0.219897	6.3324	0.12714	0.07	0.85	0.37	0.38	-0.27	0.84	-0.49	0.62	-0.18	0.73	-0.19	0.66
AT1G09030	nuclear factor Y, subunit B4	0	chr1	2908611	2909030	5.84458	0.129958	5.8018	0.100095	5.92068	0.0615771	5.84611	0.169001	5.81409	0.0630257	5.7529	0.192646	5.67848	0.194624	5.66027	0.219081	5.62615	0.241836	-0.04	0.85	0.08	0.66	-0.03	0.95	-0.09	0.85	-0.02	0.97	-0.05	0.92
AT_1_-_1_2910689-2910796		0	chr1	2910686	2910793	4.83172	0.272931	5.07651	0.0803042	5.07781	0.138897	5.56125	0.481952	5.46264	0.233857	5.36109	0.0806177	5.42224	0.372895	5.31234	0.154341	5.3483	0.209633	0.24	0.47	0.25	0.49	-0.1	0.95	-0.2	0.82	-0.11	0.86	-0.07	0.92
AT1G09040		1	chr1	2911317	2915369	8.79916	0.197279	8.88738	0.104097	8.831	0.0891717	8.75617	0.0891006	8.7401	0.104524	8.78412	0.109317	8.8105	0.135	8.8125	0.232648	8.84083	0.399745	0.09	0.75	0.03	0.92	-0.02	0.97	0.03	0.92	0	1	0.03	0.97
AT1G09050		1	chr1	2918031	2920889	9.05155	0.083533	9.07631	0.105867	9.13548	0.132978	8.92632	0.048777	8.8492	0.0813028	8.90821	0.146374	8.98884	0.056263	8.75563	0.0405384	8.84321	0.06088	0.02	0.9	0.08	0.65	-0.08	0.73	-0.02	0.96	-0.23	0.11	-0.15	0.26
AT1G09060	Zinc finger, RING-type;Transcription factor jumonji/aspartyl beta-hydroxylase	0	chr1	2921064	2925762	10.3232	0.0775109	10.2093	0.070186	10.257	0.0540337	10.0558	0.106057	10.161	0.113277	10.1217	0.124074	10.1016	0.0966074	10.2928	0.201979	10.1839	0.0934445	-0.11	0.36	-0.07	0.55	0.11	0.79	0.07	0.83	0.19	0.56	0.08	0.68
AT1G09070	soybean gene regulated by cold-2	1	chr1	2927703	2928968	10.7767	0.258209	11.1296	0.213904	10.9356	0.260431	11.0196	0.24739	11.0665	0.20668	10.8701	0.0909983	10.7639	0.0696565	10.6724	0.11971	10.7953	0.247547	0.35	0.38	0.16	0.72	0.05	0.96	-0.15	0.76	-0.09	0.66	0.03	0.95
AT1G09080	Heat shock protein 70 (Hsp 70) family protein	0	chr1	2929217	2931841	8.23982	0.995416	7.17084	0.823061	6.98338	0.570146	10.7022	0.125289	9.6689	0.68979	10.9641	0.364595	10.5632	0.663233	11.5528	0.425105	10.817	0.282581	-1.07	0.49	-1.26	0.35	-1.03	0.47	0.26	0.72	0.99	0.39	0.25	0.82
AT1G09090	respiratory burst oxidase homolog B	1	chr1	2932739	2936586	8.69949	0.160723	8.72711	0.152056	8.50804	0.123219	8.45267	0.206581	8.42256	0.174641	8.55182	0.197294	8.22483	0.110743	8.42516	0.172797	8.20228	0.248877	0.03	0.93	-0.19	0.42	-0.03	0.97	0.1	0.85	0.2	0.5	-0.02	0.96
AT1G09100	26S proteasome AAA-ATPase subunit RPT5B	0	chr1	2936528	2939326	11.2176	0.174966	10.4526	0.0973829	10.5126	0.129652	11.0875	0.0964375	10.6354	0.0822497	10.5781	0.140569	11.4275	0.145819	11.1264	0.163028	10.9677	0.0670974	-0.76	0.06	-0.71	0.09	-0.45	0.15	-0.51	0.18	-0.3	0.35	-0.46	0.12
AT1G09130	ATP-dependent caseinolytic (Clp) protease/crotonase family protein	0	chr1	2939570	2942288	12.2082	0.136628	12.1289	0.0637025	12.4103	0.0220702	11.9346	0.117722	12.218	0.23018	12.2044	0.159897	12.0563	0.154883	12.1104	0.171842	12.2327	0.0844158	-0.08	0.67	0.2	0.25	0.28	0.6	0.27	0.46	0.05	0.89	0.18	0.48
AT1G09140	SERINE-ARGININE PROTEIN 30	0	chr1	2942564	2945961	10.5664	0.249627	10.4511	0.262174	10.5783	0.177158	10.4297	0.209685	10.5393	0.223615	10.6978	0.148697	10.7735	0.161022	10.75	0.310069	11.027	0.233452	-0.12	0.81	0.01	0.98	0.11	0.89	0.27	0.57	-0.02	0.97	0.25	0.53
AT1G09150	pseudouridine synthase and archaeosine transglycosylase (PUA) domain-containing protein	1	chr1	2946229	2949159	10.3996	0.0994174	10.3007	0.0832251	10.3716	0.0840418	10.2514	0.115033	10.369	0.132377	10.2914	0.0675331	10.087	0.117649	10.2172	0.144808	10.2121	0.10141	-0.1	0.52	-0.03	0.88	0.12	0.79	0.04	0.88	0.13	0.64	0.13	0.58
AT1G09155	phloem protein 2-B15	0	chr1	2949676	2950989	8.45045	0.138771	8.41024	0.0991255	8.15304	0.0355509	9.42523	0.0994096	8.96481	0.142646	8.99625	0.262504	9.34807	0.436206	8.75891	0.188147	8.65426	0.153327	-0.04	0.86	-0.3	0.16	-0.46	0.24	-0.43	0.42	-0.59	0.39	-0.69	0.31
AT1G09157	Protein of unknown function (DUF679)	0	chr1	2951665	2952396	5.37086	0.0556883	5.27042	0.0400607	5.55206	0.29116	5.28009	0.336067	5.20071	0.236337	5.20503	0.31616	5.38577	0.369176	5.36476	0.121487	5.35222	0.136836	-0.1	0.25	0.18	0.6	-0.08	0.95	-0.08	0.94	-0.02	0.98	-0.03	0.96
AT1G09160	Protein phosphatase 2C family protein	0	chr1	2952771	2955689	9.63906	0.0767995	9.59643	0.0493832	9.71944	0.0834428	9.73337	0.113756	9.54938	0.11917	9.7151	0.0525322	9.6989	0.0522522	9.46039	0.0477335	9.78401	0.0707307	-0.04	0.71	0.08	0.54	-0.18	0.59	-0.02	0.95	-0.24	0.11	0.09	0.49
AT1G09170	P-loop nucleoside triphosphate hydrolases superfamily protein with CH (Calponin Homology) domain	0	chr1	2956589	2962207	6.85789	0.206677	6.84458	0.0413446	6.89946	0.16508	6.79813	0.310457	6.89032	0.145912	7.2893	0.103525	6.95141	0.0304149	6.91201	0.100398	7.10587	0.0893038	-0.01	0.97	0.04	0.91	0.09	0.92	0.49	0.43	-0.04	0.81	0.15	0.28
AT1G09176		1	chr1	2964152	2964604	6.99373	0.148446	7.14196	0.0737932	6.90106	0.133821	6.77574	0.184154	6.973	0.196626	7.13728	0.169757	8.52823	0.164902	8.46789	0.244969	8.33045	0.144389	0.15	0.45	-0.09	0.7	0.2	0.76	0.36	0.44	-0.06	0.9	-0.2	0.53
AT1G09180	secretion-associated RAS super family 1	1	chr1	2965023	2965972	6.03437	0.223209	6.01734	0.288244	5.68925	0.144452	7.35622	0.164091	6.87974	0.362408	7.61663	0.294473	9.60957	0.128692	9.9531	0.122651	9.71855	0.299112	-0.02	0.98	-0.35	0.29	-0.48	0.57	0.26	0.68	0.34	0.23	0.11	0.83
AT1G09190	Tetratricopeptide repeat (TPR)-like superfamily protein	0	chr1	2966120	2967718	7.93294	0.138067	8.10927	0.128186	8.01938	0.07581	7.89071	0.15056	7.71947	0.217951	7.96685	0.071631	8.1512	0.0446744	8.01972	0.100686	8.1504	0.0770694	0.18	0.43	0.09	0.64	-0.17	0.8	0.08	0.8	-0.13	0.41	0	1
AT1G09195		0	chr1	2967940	2971498	6.38184	0.126542	6.54913	0.135788	6.19584	0.113089	6.19062	0.407302	6.30789	0.113824	6.26468	0.149749	6.17276	0.366064	6.31779	0.552374	6.05763	0.391358	0.17	0.45	-0.19	0.35	0.12	0.92	0.07	0.94	0.15	0.89	-0.12	0.89
AT1G09200	Histone superfamily protein	0	chr1	2971593	2972199	13.0597	0.0362672	12.9881	0.0728869	13.1496	0.0992318	12.5338	0.127621	12.5589	0.094616	12.4395	0.152602	11.8669	0.155912	11.9774	0.166153	12.1604	0.178964	-0.07	0.46	0.09	0.46	0.03	0.96	-0.09	0.8	0.11	0.75	0.29	0.38
AT1G09210	calreticulin 1b	0	chr1	2972842	2976750	8.47978	0.148021	8.33827	0.0645335	8.253	0.143953	9.0877	0.728523	8.46753	0.393008	8.64463	0.127022	8.77412	0.177429	9.03815	0.197074	9.04691	0.179956	-0.14	0.46	-0.23	0.35	-0.62	0.75	-0.44	0.75	0.26	0.49	0.27	0.44
AT1G09220	Pentatricopeptide repeat (PPR) superfamily protein	0	chr1	2977792	2979466	6.07776	0.0867088	6.12339	0.153379	6.01142	0.0916893	6.25345	0.468501	5.9547	0.251825	6.30835	0.147783	6.04337	0.333294	6.24764	0.204919	6.10343	0.474901	0.05	0.85	-0.07	0.66	-0.3	0.83	0.05	0.96	0.2	0.73	0.06	0.95
AT1G09230	RNA-binding (RRM/RBD/RNP motifs) family protein	0	chr1	2979520	2982624	9.02483	0.131535	8.84778	0.0605234	8.93543	0.0977228	8.90729	0.239018	9.00727	0.190846	9.05683	0.15417	8.97108	0.104798	9.08414	0.0692015	9.05582	0.208867	-0.18	0.31	-0.09	0.65	0.1	0.9	0.15	0.78	0.11	0.54	0.08	0.81
AT1G09240	nicotianamine synthase 3	1	chr1	2984881	2986130	5.55671	0.148349	5.45147	0.244516	5.49186	0.100032	5.47773	0.106269	5.57603	0.182097	5.34359	0.208996	5.00517	0.151291	5.33183	0.247221	5.2121	0.127529	-0.11	0.77	-0.06	0.77	0.1	0.86	-0.13	0.76	0.33	0.43	0.21	0.46
AT1G09245	Plant self-incompatibility protein S1 family	0	chr1	2986939	2987393	5.10063	0.250577	5.20791	0.105199	5.04796	0.284439	5.35093	0.155203	5.42858	0.21935	5.3624	0.0675904	5.60807	0.518368	5.11478	0.220943	5.32835	0.311332	0.11	0.76	-0.05	0.92	0.08	0.91	0.01	0.98	-0.49	0.55	-0.28	0.76
AT1G09250	basic helix-loop-helix (bHLH) DNA-binding superfamily protein	1	chr1	2989378	2990357	11.35	0.0913486	11.2525	0.108848	11.0117	0.0521969	11.4971	0.0799273	11.49	0.152516	11.4266	0.118225	11.383	0.148503	11.2692	0.158241	11.0337	0.151193	-0.1	0.56	-0.34	0.09	-0.01	0.99	-0.07	0.79	-0.11	0.73	-0.35	0.28
AT_1_+_0_2991721-2991819		1	chr1	2991719	2991817	5.54858	0.121286	5.39185	0.160944	5.3471	0.195701	5.91021	0.476689	6.27634	1.14345	6.02763	0.693162	5.68114	0.164124	5.63459	0.268015	5.68749	0.119403	-0.16	0.51	-0.2	0.45	0.37	0.91	0.12	0.95	-0.05	0.93	0.01	0.99
AT_1_+_2_2992122-2992259		1	chr1	2992120	2992257	5.51104	0.122845	5.42174	0.151633	5.28721	0.163799	5.47262	0.31836	5.25905	0.157364	5.49597	0.110066	5.54415	0.162354	5.60245	0.102606	5.62406	0.091207	-0.09	0.71	-0.22	0.35	-0.21	0.81	0.02	0.98	0.06	0.85	0.08	0.77
AT1G09260	Chaperone DnaJ-domain superfamily protein	1	chr1	2993404	2993820	4.93881	0.245307	4.97387	0.160674	4.78558	0.380595	5.09859	0.3193	4.94371	0.108083	5.11108	0.186749	5.02294	0.274381	4.92243	0.151128	5.0789	0.194655	0.04	0.94	-0.15	0.79	-0.15	0.86	0.01	0.99	-0.1	0.84	0.06	0.92
AT1G09270	importin alpha isoform 4	1	chr1	2994369	2998222	11.7442	0.258422	11.7686	0.103787	11.7406	0.044907	11.9265	0.14109	11.7563	0.154803	11.8711	0.161069	11.8848	0.196659	11.7694	0.0827932	11.8122	0.158642	0.02	0.96	0	0.99	-0.17	0.73	-0.06	0.89	-0.12	0.72	-0.07	0.85
AT1G09280		0	chr1	2998100	3001315	11.6497	0.144937	11.4928	0.024147	11.6036	0.0596286	11.5466	0.0398023	11.8115	0.0823657	11.7102	0.0707489	11.5824	0.18584	11.8123	0.0553369	11.7295	0.135079	-0.16	0.37	-0.05	0.82	0.26	0.21	0.16	0.31	0.23	0.41	0.15	0.66
AT1G09290		0	chr1	3001517	3003762	10.145	0.0681655	9.9922	0.132007	10.1077	0.0765346	9.97164	0.116018	10.2171	0.103918	10.1102	0.0764445	9.83534	0.178947	10.14	0.137487	9.98349	0.0630006	-0.15	0.39	-0.04	0.77	0.25	0.44	0.14	0.58	0.3	0.36	0.15	0.59
AT1G09300	Metallopeptidase M24 family protein	1	chr1	3003495	3008213	10.2373	0.0453852	10.2171	0.0682974	10.1705	0.0339332	10.2151	0.0915261	10.1436	0.20617	10.2615	0.135989	10.1432	0.0680923	10.2642	0.130043	10.1716	0.0942289	-0.02	0.86	-0.07	0.32	-0.07	0.9	0.05	0.88	0.12	0.58	0.03	0.88
AT1G09310	Protein of unknown function, DUF538	1	chr1	3009055	3009880	6.42076	0.0678139	6.41427	0.25118	6.09195	0.233779	6.07528	0.28368	7.1623	2.11851	6.48546	0.597049	6.52727	0.642075	6.56952	0.289148	6.20686	0.210939	-0.01	0.99	-0.33	0.28	1.09	0.84	0.41	0.74	0.04	0.97	-0.32	0.75
AT1G09320	agenet domain-containing protein	0	chr1	3009941	3012363	4.8861	0.142448	5.10287	0.116714	4.89648	0.375983	5.11605	0.172993	5.09454	0.242816	5.39533	0.627809	5.09765	0.156369	4.77916	0.340365	5.18759	0.183714	0.22	0.33	0.01	0.99	-0.02	0.98	0.28	0.82	-0.32	0.56	0.09	0.81
AT1G09330		0	chr1	3012762	3015091	11.748	0.0814837	11.678	0.129338	11.7898	0.0337725	11.5366	0.246459	11.5696	0.183616	11.587	0.18007	11.4643	0.0684621	11.5084	0.164974	11.5876	0.133003	-0.07	0.71	0.04	0.7	0.03	0.97	0.05	0.94	0.04	0.88	0.12	0.57
AT1G09340	chloroplast RNA binding	1	chr1	3015328	3018234	6.00938	0.226168	6.00663	0.166911	5.93855	0.143276	6.22528	0.30107	6.20469	0.0433296	6.27697	0.066394	6.39761	0.0880236	6.20397	0.09317	6.26337	0.153814	0	1	-0.07	0.84	-0.02	0.98	0.05	0.94	-0.19	0.32	-0.13	0.6
AT1G09350	galactinol synthase 3	1	chr1	3019819	3021441	7.92932	0.568761	8.77965	0.179106	8.80887	0.276705	7.60084	0.241642	6.85199	0.369464	7.50402	0.181678	6.55218	0.267396	6.6962	0.359993	6.88146	0.119117	0.85	0.26	0.88	0.27	-0.75	0.41	-0.1	0.87	0.14	0.84	0.33	0.42
AT1G09360	Plant invertase/pectin methylesterase inhibitor superfamily protein	1	chr1	3021802	3022368	5.40145	0.138821	5.59931	0.135936	5.6348	0.140937	5.58719	0.343513	5.43114	0.157845	5.46324	0.240151	5.32378	0.192545	5.36881	0.21397	5.53083	0.148393	0.2	0.39	0.23	0.32	-0.16	0.87	-0.12	0.88	0.05	0.93	0.21	0.55
AT1G09370	Plant invertase/pectin methylesterase inhibitor superfamily protein	1	chr1	3024896	3025435	5.35432	0.0828197	4.88526	0.203464	5.23756	0.152728	5.3157	0.451786	4.90672	0.0913314	5.00574	0.234118	5.2095	0.133291	5.33876	0.243849	5.17091	0.264047	-0.47	0.15	-0.12	0.56	-0.41	0.7	-0.31	0.75	0.13	0.76	-0.04	0.94
AT1G09380	nodulin MtN21 /EamA-like transporter family protein	0	chr1	3026135	3029549	7.31594	0.182306	7.45466	0.0543325	7.02606	0.228456	7.55178	0.21651	7.80747	0.177304	7.66135	0.154478	7.65429	0.0547107	7.88246	0.0762662	7.62893	0.108833	0.14	0.54	-0.29	0.4	0.26	0.68	0.11	0.82	0.23	0.16	-0.03	0.9
AT1G09390	GDSL-like Lipase/Acylhydrolase superfamily protein	1	chr1	3031203	3033582	6.94815	0.186132	6.76896	0.151794	6.95253	0.130699	7.19845	0.109338	6.82632	0.12688	7.12574	0.170733	7.40972	0.187733	7.16504	0.0864917	7.16173	0.155185	-0.18	0.53	0	0.99	-0.37	0.3	-0.07	0.85	-0.24	0.41	-0.25	0.47
AT1G09400	FMN-linked oxidoreductases superfamily protein	0	chr1	3033512	3035036	6.373	0.260154	6.18365	0.22183	6.19395	0.140728	7.04937	0.136713	6.32574	0.349923	6.62418	0.141152	7.7908	0.21344	7.52349	0.228616	7.29777	0.171779	-0.19	0.65	-0.18	0.61	-0.72	0.35	-0.43	0.28	-0.27	0.56	-0.49	0.25
AT1G09410	pentatricopeptide (PPR) repeat-containing protein	1	chr1	3035443	3037560	6.21692	0.196226	6.33527	0.0843568	6.15615	0.069691	6.29573	0.225285	6.38484	0.314655	6.48408	0.217083	7.24606	0.183844	7.05991	0.221385	7.19928	0.273789	0.12	0.65	-0.06	0.82	0.09	0.93	0.19	0.75	-0.19	0.67	-0.05	0.94
AT1G09415	NIM1-interacting 3	0	chr1	3037754	3038408	7.52343	0.0510039	7.70199	0.17826	7.51223	0.0983534	7.78766	0.148704	7.80589	0.135436	7.94119	0.276117	7.83426	0.215433	8.188	0.177375	7.96954	0.0599778	0.18	0.42	-0.01	0.95	0.02	0.98	0.15	0.79	0.35	0.39	0.14	0.68
AT1G09420	glucose-6-phosphate dehydrogenase 4	0	chr1	3038462	3041873	7.88728	0.1378	8.16517	0.153449	8.09668	0.0510875	7.86754	0.0969674	8.06763	0.229359	8.09999	0.147016	7.95105	0.267317	8.28438	0.0423041	8.1559	0.0867431	0.28	0.28	0.21	0.26	0.2	0.73	0.23	0.48	0.33	0.4	0.2	0.62
AT1G09421	other RNA	1	chr1	3038631	3039326	6.33481	0.131004	6.13807	0.183307	6.37267	0.112917	6.53332	0.46948	6.50523	0.23433	6.43905	0.126934	6.33129	0.0918428	6.49234	0.10399	6.52228	0.0892044	-0.2	0.46	0.04	0.88	-0.03	0.99	-0.09	0.93	0.16	0.42	0.19	0.31
AT1G09430	ATP-citrate lyase A-3	1	chr1	3041996	3045402	12.2301	0.0849746	12.175	0.0776251	12.1624	0.0771368	12.3075	0.0490379	12.4898	0.0576824	12.3907	0.0809932	12.2558	0.046924	12.4224	0.0726142	12.2726	0.0170578	-0.06	0.7	-0.07	0.62	0.18	0.27	0.08	0.63	0.17	0.23	0.02	0.83
AT1G09440	Protein kinase superfamily protein	0	chr1	3045513	3047893	7.7837	0.228572	8.21714	0.0886479	8.00172	0.087729	8.22342	0.184233	7.75964	0.237732	7.9993	0.0697862	7.89609	0.0894797	7.50132	0.190476	7.58845	0.156233	0.43	0.19	0.22	0.44	-0.46	0.45	-0.22	0.53	-0.39	0.24	-0.31	0.27
AT1G09450	Protein kinase superfamily protein	1	chr1	3049024	3053112	7.70541	0.20538	7.56185	0.0943216	7.49018	0.157902	7.6182	0.209343	7.7382	0.236296	7.73857	0.157571	7.50367	0.206038	7.9321	0.122391	7.7279	0.273178	-0.14	0.59	-0.22	0.47	0.12	0.88	0.12	0.8	0.43	0.25	0.22	0.65
AT1G09460	Carbohydrate-binding X8 domain superfamily protein	1	chr1	3053901	3055360	11.5683	0.384092	11.6401	0.266678	11.4314	0.078676	11.2247	0.302993	11.2327	0.190934	11.1469	0.11479	10.5372	0.161625	10.61	0.215094	10.3451	0.293697	0.07	0.92	-0.14	0.78	0.01	0.99	-0.08	0.9	0.07	0.86	-0.19	0.7
AT1G09470		0	chr1	3055231	3057443	6.59301	0.173708	6.52524	0.212107	6.61542	0.132781	6.41085	0.154947	6.34347	0.0796767	6.6053	0.192716	6.20908	0.185456	6.23756	0.132298	6.39389	0.109275	-0.07	0.86	0.02	0.95	-0.07	0.88	0.19	0.67	0.03	0.94	0.18	0.55
AT1G09480	NAD(P)-binding Rossmann-fold superfamily protein	1	chr1	3057975	3060661	8.59603	0.275443	8.71758	0.217479	8.54743	0.608032	9.28661	0.39706	8.81451	0.221521	8.87176	0.188255	8.95822	0.176084	8.69038	0.116041	8.79402	0.151084	0.12	0.79	-0.05	0.96	-0.47	0.63	-0.41	0.61	-0.27	0.38	-0.16	0.63
AT1G09483		0	chr1	3060992	3061729	5.34982	0.240094	5.2301	0.162715	5.4638	0.0675634	5.41531	0.176956	5.26475	0.0961743	5.26077	0.168837	5.38137	0.186575	5.35152	0.234859	5.43575	0.024724	-0.12	0.74	0.11	0.71	-0.15	0.75	-0.15	0.74	-0.03	0.96	0.05	0.85
AT1G09486		0	chr1	3062430	3063731	15.2169	0.0918428	15.0287	0.106619	15.2375	0.161853	14.9362	0.233215	15.0362	0.106297	15.0587	0.107708	14.7923	0.14694	14.8952	0.0581754	15.1326	0.214625	-0.19	0.28	0.02	0.94	0.1	0.88	0.12	0.8	0.1	0.67	0.34	0.36
AT1G09490	NAD(P)-binding Rossmann-fold superfamily protein	1	chr1	3064124	3065937	8.38938	0.168408	8.20361	0.114038	8.3492	0.13855	8.17425	0.192377	8.23843	0.159057	8.32364	0.145701	8.05376	0.156599	8.15921	0.0620172	8.18036	0.0364003	-0.19	0.44	-0.04	0.9	0.06	0.92	0.15	0.74	0.11	0.68	0.13	0.59
AT1G09500	NAD(P)-binding Rossmann-fold superfamily protein	1	chr1	3066699	3068598	5.49297	0.36003	5.30576	0.145468	5.59145	0.159598	5.7989	0.466023	5.60017	0.123488	5.84884	0.470905	5.51132	0.182895	5.59093	0.130075	5.47261	0.221083	-0.19	0.7	0.1	0.85	-0.2	0.87	0.05	0.97	0.08	0.82	-0.04	0.94
AT1G09510	NAD(P)-binding Rossmann-fold superfamily protein	1	chr1	3069385	3070910	5.26424	0.178618	5.19471	0.244088	5.29006	0.124346	5.19305	0.254131	4.82881	0.22057	4.98144	0.363832	4.92574	0.0846213	5.08431	0.12593	4.92371	0.145555	-0.07	0.87	0.03	0.94	-0.36	0.61	-0.21	0.8	0.16	0.47	0	1
AT1G09520		0	chr1	3070946	3072050	10.4105	0.152146	10.4577	0.100203	10.4376	0.102067	10.2572	0.120056	10.2475	0.105913	10.2511	0.0584734	10.5991	0.0809902	10.5208	0.148251	10.528	0.125495	0.05	0.85	0.03	0.92	-0.01	0.98	-0.01	0.98	-0.08	0.76	-0.07	0.75
AT1G09530	phytochrome interacting factor 3	1	chr1	3076582	3079539	6.20837	0.0535244	6.22279	0.0476162	6.05722	0.187298	6.18206	0.184461	6.0911	0.142897	6.36663	0.107496	5.8565	0.202842	6.03735	0.264779	6.00935	0.281215	0.01	0.89	-0.15	0.5	-0.09	0.88	0.18	0.64	0.18	0.72	0.15	0.77
AT_1_+_1_3083825-3084061		1	chr1	3083823	3084059	5.52398	0.0603257	5.40025	0.169278	5.53315	0.094281	5.4034	0.147644	5.57624	0.198313	5.51177	0.161457	5.48521	0.174477	5.31255	0.265773	5.58766	0.187402	-0.12	0.56	0.01	0.96	0.17	0.78	0.11	0.79	-0.17	0.72	0.1	0.79
AT1G09540	myb domain protein 61	1	chr1	3086159	3087912	6.95068	0.213515	6.94779	0.0853203	7.17625	0.135458	7.21836	0.492996	7.13113	0.343089	7.50328	0.173232	7.45237	0.291458	7.62215	0.393918	7.55356	0.180318	0	0.99	0.23	0.44	-0.09	0.96	0.28	0.77	0.17	0.82	0.1	0.85
AT1G09550	Pectinacetylesterase family protein	0	chr1	3089733	3092327	5.76994	0.0583876	5.65484	0.165119	5.77769	0.146777	5.74905	0.101223	5.75511	0.208028	5.76544	0.265777	5.74	0.155653	5.70813	0.169534	5.81487	0.0694641	-0.12	0.58	0.01	0.98	0.01	0.99	0.02	0.98	-0.03	0.94	0.07	0.77
AT_1_-_0_3093276-3093530		0	chr1	3093274	3093528	4.83712	0.165969	4.7014	0.146692	4.82122	0.102477	4.74002	0.11974	4.82383	0.413328	4.68229	0.247161	4.81192	0.289806	4.82108	0.175292	4.84508	0.255122	-0.14	0.61	-0.02	0.96	0.08	0.95	-0.06	0.92	0.01	0.99	0.03	0.96
AT1G09560	germin-like protein 5	1	chr1	3093839	3094864	13.2457	0.177712	13.0893	0.0709415	13.2704	0.122246	13.2992	0.133981	13.5792	0.202559	13.8934	0.172276	13.4653	0.177212	13.7676	0.149633	13.7949	0.0349766	-0.16	0.49	0.02	0.94	0.28	0.58	0.59	0.21	0.3	0.37	0.33	0.25
AT1G09570	phytochrome A	0	chr1	3095256	3100357	9.00134	0.259891	9.72097	0.163598	9.15368	0.0231778	9.60581	0.282595	9.26111	0.110976	9.26938	0.10589	9.52498	0.384938	9.05087	0.278253	8.8903	0.26703	0.72	0.13	0.15	0.62	-0.34	0.59	-0.34	0.54	-0.47	0.49	-0.63	0.35
AT1G09575	Protein of unknown function (DUF607)	0	chr1	3101671	3102925	8.67833	0.131431	8.74036	0.0393279	8.54149	0.098321	9.0206	0.280257	8.74452	0.200547	9.65125	1.93472	8.58468	0.219837	8.40411	0.273039	8.39396	0.132662	0.06	0.72	-0.14	0.47	-0.28	0.74	0.63	0.87	-0.18	0.74	-0.19	0.61
AT1G09580	emp24/gp25L/p24 family/GOLD family protein	1	chr1	3104588	3106290	10.2549	0.311531	10.1713	0.121461	10.2586	0.0621807	10.0435	0.227796	10.1087	0.21706	10.1772	0.0969659	9.99275	0.0515375	10.3313	0.0991419	10.3344	0.24976	-0.08	0.86	0	0.99	0.07	0.94	0.13	0.77	0.34	0.13	0.34	0.35
AT1G09590	Translation protein SH3-like family protein	1	chr1	3106502	3107772	15.2726	0.0805245	15.1742	0.0222991	15.4183	0.137274	14.7525	0.107842	14.749	0.0832856	14.8714	0.144146	14.501	0.19751	14.6096	0.170836	14.8999	0.132606	-0.1	0.33	0.15	0.43	0	0.99	0.12	0.72	0.11	0.78	0.4	0.27
AT1G09600	Protein kinase superfamily protein	1	chr1	3108617	3111318	6.99788	0.166163	7.02875	0.220166	7.26928	0.122648	7.00952	0.372746	6.88829	0.0388724	7.04261	0.138191	6.90232	0.224458	6.80475	0.124978	7.03848	0.177883	0.03	0.94	0.27	0.29	-0.12	0.9	0.03	0.97	-0.1	0.8	0.14	0.75
AT1G09610	Protein of unknown function (DUF579)	1	chr1	3111694	3112873	5.57096	0.132831	5.9561	0.0775002	5.78023	0.0908071	5.80875	0.201351	5.69976	0.189296	5.65819	0.079731	5.71139	0.10903	5.77076	0.204396	5.62807	0.0906466	0.39	0.12	0.21	0.29	-0.11	0.88	-0.15	0.71	0.06	0.87	-0.08	0.69
AT1G09620	ATP binding;leucine-tRNA ligases;aminoacyl-tRNA ligases;nucleotide binding;ATP binding;aminoacyl-tRNA ligases	0	chr1	3112778	3116699	7.96192	0.236273	8.03255	0.0475101	8.30077	0.103755	8.21039	0.268277	8.06848	0.188909	8.35135	0.146452	8.27382	0.145825	8.27558	0.176082	8.39	0.230115	0.07	0.83	0.34	0.29	-0.14	0.87	0.14	0.8	0	1	0.12	0.78
AT1G09625		0	chr1	3117137	3117567	5.36626	0.249669	5.52567	0.132283	5.40209	0.169946	5.47904	0.210124	5.60338	0.0551253	5.58625	0.137489	5.79986	0.489935	5.54221	0.118915	5.70529	0.146098	0.16	0.64	0.04	0.94	0.12	0.82	0.11	0.82	-0.26	0.74	-0.09	0.91
AT1G09630	RAB GTPase 11C	0	chr1	3118203	3119708	11.9642	0.0969184	11.8158	0.136785	11.8838	0.0823721	11.8182	0.153047	11.9639	0.1592	11.8532	0.124656	11.6622	0.0816701	11.889	0.112142	11.9016	0.147575	-0.15	0.46	-0.08	0.59	0.15	0.79	0.03	0.93	0.23	0.28	0.24	0.33
AT1G09640	Translation elongation factor EF1B, gamma chain	1	chr1	3119878	3122526	15.7288	0.0987852	15.7268	0.0214437	15.7868	0.02461	15.555	0.197392	15.7351	0.0615428	15.7934	0.0457916	15.8358	0.0845907	15.8368	0.0949264	15.9455	0.115093	0	0.99	0.06	0.63	0.18	0.7	0.24	0.52	0	1	0.11	0.6
AT1G09645		1	chr1	3122956	3124578	10.9075	0.0426785	10.7754	0.106173	10.632	0.072547	11.1856	0.100674	11.3455	0.201607	11.1502	0.213316	11.0767	0.133821	11.314	0.145186	11.0427	0.0724067	-0.13	0.34	-0.28	0.09	0.16	0.77	-0.04	0.94	0.24	0.41	-0.03	0.89
AT1G09650	F-box and associated interaction domains-containing protein	1	chr1	3125807	3127284	5.72419	0.0927863	5.74035	0.0424079	5.8553	0.232241	5.36236	0.313279	5.88415	1.16337	5.47375	0.161461	5.13257	0.320656	5.4979	0.205491	5.23223	0.33415	0.02	0.91	0.13	0.66	0.52	0.87	0.11	0.87	0.37	0.51	0.1	0.89
AT1G09660	RNA-binding KH domain-containing protein	0	chr1	3127771	3131094	10.4523	0.153721	10.1608	0.11225	10.3291	0.085287	10.1464	0.263646	10.3356	0.152185	10.3715	0.222254	9.83385	0.0877862	9.95112	0.250725	10.1659	0.200465	-0.29	0.23	-0.12	0.55	0.19	0.81	0.23	0.73	0.12	0.77	0.33	0.31
AT_1_+_1_3132632-3132793		1	chr1	3132630	3132791	6.21938	0.0356242	6.01437	0.210901	6.08739	0.113015	5.87087	0.369875	5.99697	0.363873	5.92064	0.154885	5.87821	0.160491	6.01453	0.0892896	6.01954	0.370629	-0.21	0.42	-0.13	0.35	0.13	0.93	0.05	0.96	0.14	0.62	0.14	0.82
AT1G09665	Toll-Interleukin-Resistance (TIR) domain family protein	1	chr1	3133095	3133674	5.46794	0.071687	5.60591	0.227198	5.41867	0.0902325	5.5399	0.270445	5.55526	0.135963	5.5838	0.384065	5.5892	0.183815	5.51418	0.290816	5.65421	0.212767	0.14	0.63	-0.05	0.73	0.02	0.99	0.04	0.97	-0.08	0.89	0.07	0.89
AT1G09680	Pentatricopeptide repeat (PPR) superfamily protein	0	chr1	3134107	3135930	6.67058	0.12248	6.67362	0.146813	6.63297	0.0688038	6.75381	0.158127	6.60216	0.0796663	7.30013	1.06831	6.55954	0.204401	6.5755	0.143604	6.5483	0.0816163	0	0.99	-0.04	0.84	-0.15	0.71	0.55	0.79	0.02	0.97	-0.01	0.98
AT1G09690	Translation protein SH3-like family protein	0	chr1	3136188	3137475	15.895	0.0385896	15.7485	0.0793265	16.0223	0.120536	15.4911	0.179772	15.7256	0.0844815	15.7535	0.07143	15.342	0.225735	15.581	0.135577	15.7333	0.0901853	-0.15	0.21	0.13	0.39	0.23	0.57	0.26	0.46	0.24	0.53	0.39	0.29
AT1G09700	dsRNA-binding domain-like superfamily protein	0	chr1	3137767	3140353	9.64709	0.123589	9.67477	0.09203	9.72786	0.143537	9.59226	0.12009	9.2804	0.135942	9.53871	0.146615	9.67672	0.0626417	9.52909	0.080225	9.70963	0.0780604	0.03	0.9	0.08	0.73	-0.31	0.41	-0.05	0.88	-0.15	0.33	0.03	0.83
AT1G09710	Homeodomain-like superfamily protein	1	chr1	3140868	3144370	9.43922	0.123999	9.27718	0.124905	9.47666	0.0268591	9.15891	0.112241	9.39446	0.153534	9.52268	0.0755267	9.30092	0.0688846	9.39578	0.150997	9.43879	0.0829054	-0.16	0.44	0.04	0.82	0.24	0.55	0.36	0.21	0.09	0.71	0.14	0.37
AT1G09720	Kinase interacting (KIP1-like) family protein	0	chr1	3144438	3147303	6.05292	0.070171	6.09943	0.0882552	6.20097	0.178928	6.35219	0.425664	6.58265	0.545322	6.46015	0.376158	6.63163	0.421258	6.39381	0.560815	6.37154	0.362304	0.05	0.74	0.15	0.51	0.23	0.9	0.11	0.93	-0.24	0.83	-0.26	0.75
AT1G09730	Cysteine proteinases superfamily protein	0	chr1	3147667	3154380	8.22151	0.191506	8.63664	0.128502	8.35234	0.115538	8.44399	0.303826	8.11779	0.19155	8.35482	0.134222	8.51593	0.224306	8.06206	0.174706	8.09866	0.197614	0.42	0.19	0.13	0.62	-0.33	0.68	-0.09	0.89	-0.45	0.29	-0.42	0.34
AT1G09740	Adenine nucleotide alpha hydrolases-like superfamily protein	1	chr1	3154532	3156275	13.2765	0.0254483	13.1783	0.0630555	13.1995	0.0633639	13.244	0.154126	13.4496	0.172904	13.5764	0.203165	13.4891	0.116441	13.7406	0.052944	13.6854	0.127485	-0.1	0.25	-0.08	0.34	0.21	0.69	0.33	0.48	0.25	0.23	0.2	0.42
AT1G09750	Eukaryotic aspartyl protease family protein	1	chr1	3157501	3159148	10.4084	0.473139	10.5291	0.21265	10.2717	0.187468	10.9349	0.345658	11.1125	0.22098	11.4239	0.434957	10.1382	0.270452	10.4329	0.243854	10.7785	0.190969	0.12	0.87	-0.14	0.84	0.18	0.87	0.49	0.63	0.29	0.58	0.64	0.23
AT1G09760	U2 small nuclear ribonucleoprotein A	0	chr1	3159125	3161692	11.8738	0.0567261	11.867	0.0966116	11.9181	0.0419958	11.954	0.111548	12.0185	0.0726074	11.9811	0.0867572	11.8877	0.0714958	12.023	0.0867974	11.9417	0.0372715	-0.01	0.97	0.04	0.59	0.06	0.85	0.03	0.93	0.14	0.41	0.05	0.65
AT1G09770	cell division cycle 5	1	chr1	3161841	3165360	10.3929	0.0824834	10.3188	0.0664996	10.353	0.0707275	10.6086	0.238634	10.7122	0.176288	10.7651	0.0465625	10.6552	0.0648711	10.8245	0.273908	10.8169	0.110527	-0.07	0.55	-0.04	0.77	0.1	0.89	0.16	0.73	0.17	0.69	0.16	0.38
AT1G09780	Phosphoglycerate mutase, 2,3-bisphosphoglycerate-independent	0	chr1	3165370	3167869	12.4298	0.289598	12.5549	0.111579	12.5432	0.114916	12.5255	0.212553	12.2308	0.282917	12.421	0.0826962	12.0335	0.120022	11.9545	0.231404	12.152	0.0997178	0.13	0.75	0.11	0.77	-0.29	0.72	-0.1	0.8	-0.08	0.85	0.12	0.6
AT1G09790	COBRA-like protein 6 precursor	0	chr1	3168482	3170819	5.1857	0.192	5.10811	0.0906443	4.98876	0.240663	4.94747	0.230765	5.05279	0.221502	5.14126	0.298599	5.11297	0.199344	5.1707	0.206998	5.11412	0.0228129	-0.08	0.78	-0.2	0.58	0.11	0.9	0.19	0.78	0.06	0.9	0	1
AT1G09794	Cox19 family protein (CHCH motif)	1	chr1	3172108	3173463	9.36548	0.230746	9.07386	0.0750101	9.12416	0.0594568	9.37471	0.113119	9.26252	0.0978521	9.28941	0.191201	9.33537	0.210156	9.43245	0.122216	9.3754	0.0621568	-0.29	0.32	-0.24	0.39	-0.11	0.75	-0.09	0.84	0.1	0.79	0.04	0.91
AT1G09795	ATP phosphoribosyl transferase 2	1	chr1	3173534	3176910	8.92702	0.15003	8.69316	0.0807859	8.77148	0.0439501	8.93647	0.175172	8.85023	0.170751	9.05428	0.109522	8.65104	0.0671816	8.81683	0.103552	8.97727	0.0807368	-0.23	0.27	-0.16	0.4	-0.09	0.89	0.12	0.76	0.17	0.36	0.33	0.1
AT1G09800	Pseudouridine synthase family protein	0	chr1	3176883	3180421	8.09709	0.141095	8.30166	0.150439	8.29648	0.0652586	8.16442	0.18741	8.10649	0.0974986	8.11332	0.0949107	8.03447	0.110558	8.0839	0.152394	8.22103	0.143472	0.2	0.4	0.2	0.29	-0.06	0.92	-0.05	0.9	0.05	0.87	0.19	0.46
AT1G09810	evolutionarily conserved C-terminal region 11	0	chr1	3180936	3184224	9.53782	0.155766	9.32848	0.110546	9.37413	0.192536	9.66385	0.212597	9.77771	0.174111	9.68674	0.132658	10.0774	0.0273594	10.1758	0.151213	10.0533	0.211794	-0.21	0.36	-0.16	0.57	0.11	0.87	0.02	0.97	0.1	0.67	-0.02	0.95
AT1G09812		1	chr1	3187817	3188580	6.34631	0.0736693	6.43003	0.308195	6.40691	0.132034	7.14274	0.105424	7.22959	0.142973	7.21504	0.100386	7.95698	0.125963	7.93363	0.125808	8.08554	0.393083	0.08	0.85	0.06	0.75	0.09	0.85	0.07	0.79	-0.02	0.94	0.13	0.84
AT1G09815	polymerase delta 4	1	chr1	3189369	3190242	12.2748	0.0486804	12.4671	0.0436565	12.2723	0.0614022	12.9556	0.159265	12.8273	0.128956	12.832	0.0950828	15.0803	0.0191899	14.8954	0.0673515	14.9176	0.12902	0.19	0.09	0	0.98	-0.13	0.81	-0.12	0.72	-0.18	0.15	-0.16	0.38
AT1G09820	Pentatricopeptide repeat (PPR-like) superfamily protein	0	chr1	3190288	3192414	7.77342	0.178229	7.88767	0.168248	7.83058	0.150401	7.61679	0.126869	7.41656	0.193451	7.62917	0.0683175	7.54477	0.158487	7.68389	0.142011	7.51487	0.0843806	0.11	0.71	0.06	0.86	-0.2	0.71	0.01	0.97	0.14	0.66	-0.03	0.92
AT1G09830	Glycinamide ribonucleotide (GAR) synthetase	0	chr1	3192681	3195025	8.79475	0.28047	8.79459	0.206846	8.71895	0.178289	8.7364	0.293664	8.50331	0.0719858	8.7459	0.186885	8.7969	0.163154	8.67377	0.228126	8.89188	0.125337	0	1	-0.08	0.87	-0.23	0.75	0.01	0.99	-0.12	0.77	0.09	0.76
AT1G09840	shaggy-like protein kinase 41	0	chr1	3195824	3200291	10.245	0.245007	10.3442	0.0741487	10.1122	0.14542	10.6677	0.0430571	10.5245	0.188993	10.528	0.124139	10.9092	0.476716	10.551	0.239181	10.5375	0.0945804	0.1	0.76	-0.13	0.7	-0.14	0.76	-0.14	0.56	-0.36	0.66	-0.37	0.6
AT1G09850	xylem bark cysteine peptidase 3	1	chr1	3201799	3204150	8.57187	0.144116	8.55909	0.0842717	8.70163	0.0775765	8.62632	0.118034	8.85867	0.112786	8.83037	0.092369	8.67904	0.111218	9.02824	0.0785002	8.88522	0.0731846	-0.01	0.96	0.13	0.49	0.23	0.49	0.2	0.46	0.35	0.15	0.21	0.3
AT1G09860	purine permease 16	0	chr1	3204016	3205309	6.61118	0.0871528	6.84656	0.12756	6.79048	0.104521	6.36407	0.145123	6.36312	0.24209	6.97235	0.604816	6.40448	0.0948376	6.56732	0.273012	6.93179	0.696364	0.24	0.24	0.18	0.28	0	1	0.61	0.59	0.16	0.71	0.53	0.61
AT1G09870	histidine acid phosphatase family protein	1	chr1	3205741	3208598	10.6798	0.139553	10.667	0.195649	10.5967	0.100007	10.7128	0.0524132	10.7191	0.116461	10.7279	0.120782	11.7134	0.140977	11.5436	0.151159	11.4971	0.0936122	-0.01	0.97	-0.08	0.69	0.01	0.99	0.02	0.96	-0.17	0.58	-0.22	0.37
AT1G09880	Rhamnogalacturonate lyase family protein	0	chr1	3208828	3211653	6.3735	0.130599	6.32227	0.128437	6.27925	0.133681	6.57199	0.200411	6.53327	0.166291	6.55047	0.207742	6.1069	0.303806	6.22498	0.326067	6.40899	0.10708	-0.05	0.84	-0.09	0.68	-0.04	0.96	-0.02	0.97	0.12	0.87	0.3	0.51
AT1G09890	Rhamnogalacturonate lyase family protein	0	chr1	3214237	3217538	6.74525	0.228611	6.93441	0.101158	6.80722	0.0581509	6.92724	0.215453	6.57933	0.162365	6.73188	0.0786795	6.52268	0.261729	6.57572	0.194468	6.57977	0.224862	0.19	0.52	0.06	0.84	-0.35	0.53	-0.2	0.64	0.05	0.92	0.06	0.92
AT1G09900	Pentatricopeptide repeat (PPR-like) superfamily protein	1	chr1	3218133	3219929	9.11529	0.187768	9.20002	0.088364	9.09737	0.132106	9.08528	0.116363	8.85139	0.0744651	9.05495	0.0342844	9.38586	0.0411299	9.10904	0.0948462	9.27419	0.138413	0.08	0.75	-0.02	0.96	-0.23	0.41	-0.03	0.9	-0.28	0.15	-0.11	0.59
AT1G09910	Rhamnogalacturonate lyase family protein	0	chr1	3220035	3224541	11.064	0.105254	11.1251	0.0389834	11.1066	0.0818178	11.0213	0.0708069	11.358	0.153269	11.2875	0.134773	11.105	0.0417074	11.4762	0.119952	11.1748	0.159582	0.06	0.65	0.04	0.8	0.34	0.34	0.27	0.37	0.37	0.13	0.07	0.78
AT1G09920	TRAF-type zinc finger-related	0	chr1	3224684	3227070	12.5255	0.0933108	12.4127	0.0829409	12.4184	0.111398	12.5705	0.063772	12.6303	0.142325	12.6292	0.114971	12.5302	0.117119	12.697	0.107474	12.5651	0.0996041	-0.11	0.45	-0.11	0.52	0.06	0.88	0.06	0.81	0.17	0.47	0.03	0.89
AT1G09930	oligopeptide transporter 2	0	chr1	3227490	3230043	8.01796	0.261479	8.05977	0.110912	7.94137	0.148906	7.7682	0.169927	7.60989	0.122915	7.351	0.151268	7.70734	0.200228	7.4992	0.171762	7.6766	0.138197	0.04	0.92	-0.08	0.85	-0.16	0.75	-0.42	0.35	-0.21	0.59	-0.03	0.94
AT1G09932	Phosphoglycerate mutase family protein	0	chr1	3230450	3233109	10.419	0.356737	10.5746	0.551154	10.7169	0.417786	10.788	0.313862	11.2879	0.199461	10.2279	0.419477	10.9033	0.10521	11.1514	0.22137	10.9459	0.202145	0.16	0.86	0.3	0.65	0.5	0.51	-0.56	0.56	0.25	0.48	0.04	0.91
AT1G09935	Phosphoglycerate mutase family protein	0	chr1	3234060	3235530	5.70297	0.19478	5.59686	0.18253	5.77685	0.174652	5.74674	0.276445	5.98507	0.246263	5.69814	0.22154	5.62379	0.189168	5.61733	0.117007	5.70107	0.09949	-0.11	0.75	0.07	0.83	0.24	0.8	-0.05	0.95	-0.01	0.99	0.08	0.81
AT1G09940	Glutamyl-tRNA reductase family protein	0	chr1	3236995	3239554	10.7266	0.110364	10.8442	0.192936	10.9288	0.224893	10.8231	0.229802	10.721	0.1662	10.4667	0.246599	10.6753	0.232321	10.3745	0.10732	10.3744	0.185688	0.12	0.66	0.2	0.49	-0.1	0.89	-0.36	0.56	-0.3	0.41	-0.3	0.47
AT1G09950	RESPONSE TO ABA AND SALT 1	0	chr1	3240606	3241632	7.59918	0.301936	7.57003	0.111143	7.35805	0.259275	7.81501	0.285133	7.72289	0.228476	7.51949	0.220925	7.20941	0.353719	6.72198	0.0752626	7.10406	0.209748	-0.03	0.95	-0.24	0.61	-0.09	0.93	-0.3	0.66	-0.49	0.36	-0.11	0.87
AT1G09960	sucrose transporter 4	1	chr1	3244213	3247200	10.1696	0.0729098	10.2614	0.114183	10.3086	0.0907473	10.4287	0.0850342	10.5142	0.161656	10.5825	0.0907546	10.3854	0.195343	10.381	0.147393	10.3814	0.177711	0.09	0.57	0.14	0.32	0.09	0.86	0.15	0.5	0	0.99	0	0.99
AT_1_+_0_3247873-3247965		1	chr1	3247871	3247963	5.8475	0.106592	6.3521	0.326645	6.26032	0.0545471	6.40174	0.200267	6.30494	0.167189	6.33558	0.251444	6.42066	0.141693	6.29565	0.0976352	6.41767	0.260487	0.5	0.25	0.41	0.08	-0.1	0.89	-0.07	0.92	-0.13	0.63	0	1
AT1G09970	Leucine-rich receptor-like protein kinase family protein	1	chr1	3252240	3255693	14.1686	0.202011	14.3706	0.200081	14.469	0.160476	14.41	0.156674	14.155	0.217364	14.3568	0.0248149	14.4653	0.120864	14.2167	0.134837	14.464	0.105066	0.2	0.55	0.3	0.33	-0.25	0.67	-0.05	0.86	-0.25	0.35	0	1
AT1G09980	Putative serine esterase family protein	0	chr1	3256245	3261614	6.68851	0.227192	7.08172	0.0776078	6.70264	0.126229	6.9897	0.167914	6.64439	0.159047	6.84269	0.330684	6.9277	0.182571	6.54801	0.133572	6.60735	0.100991	0.39	0.21	0.01	0.97	-0.35	0.47	-0.15	0.83	-0.38	0.28	-0.32	0.31
AT1G09995	DNA repair DEAD helicase RAD3/XP-D subfamily protein	0	chr1	3262265	3263612	7.77972	0.28151	7.48346	0.0995157	7.47036	0.130166	7.85377	0.111524	8.03652	0.0384067	7.7731	0.151865	7.36056	0.236762	7.6545	0.0620988	7.32534	0.142256	-0.3	0.4	-0.31	0.39	0.18	0.45	-0.08	0.82	0.29	0.41	-0.04	0.94
AT1G10000	Ribonuclease H-like superfamily protein	0	chr1	3263877	3264788	9.57746	0.224587	9.1625	0.205342	9.72105	0.240373	9.24926	0.413909	8.99763	0.85488	8.20931	0.148116	8.51311	0.359409	8.42	0.472633	9.10315	1.13348	-0.41	0.27	0.14	0.72	-0.25	0.92	-1.04	0.26	-0.09	0.93	0.59	0.74
AT1G10010	amino acid permease 8	1	chr1	3265976	3268726	5.23287	0.202164	5.12931	0.194938	5.37924	0.173733	5.2208	0.372025	5.25177	0.155947	5.22156	0.183275	5.27829	0.197939	5.2708	0.274839	5.21113	0.0726793	-0.1	0.77	0.15	0.64	0.03	0.98	0	1	-0.01	0.99	-0.07	0.84
AT1G10020	Protein of unknown function (DUF1005)	0	chr1	3269604	3271987	10.7433	0.112914	10.8515	0.044516	10.6099	0.0939018	10.9583	0.146929	11.0018	0.236118	11.002	0.162292	11.0116	0.257226	10.8859	0.0983592	10.8254	0.175927	0.11	0.45	-0.13	0.43	0.04	0.96	0.04	0.92	-0.13	0.76	-0.19	0.68
AT1G10030	homolog of yeast ergosterol28	1	chr1	3273825	3275837	11.5809	0.180394	11.42	0.141749	11.5531	0.039156	11.2476	0.164563	11.4108	0.180539	11.3567	0.142626	10.9158	0.0583186	11.2011	0.188472	11.2046	0.215722	-0.16	0.55	-0.03	0.92	0.16	0.79	0.11	0.79	0.29	0.33	0.29	0.37
AT1G10040	alpha/beta-Hydrolases superfamily protein	0	chr1	3275891	3278697	8.29285	0.094247	8.31947	0.26287	8.40096	0.160988	8.68916	0.218555	8.80264	0.142921	8.92248	0.0901925	10.442	0.0670741	10.368	0.174772	10.4659	0.0577902	0.03	0.95	0.11	0.62	0.11	0.87	0.23	0.59	-0.07	0.8	0.02	0.86
AT1G10050	glycosyl hydrolase family 10 protein / carbohydrate-binding domain-containing protein	1	chr1	3279270	3283482	10.1665	0.203156	10.3296	0.152729	10.3395	0.0552357	10.3466	0.132592	10.1715	0.0874591	10.4295	0.495064	11.4305	0.112792	11.2286	0.0593574	11.2418	0.201908	0.16	0.59	0.17	0.48	-0.18	0.6	0.08	0.94	-0.2	0.3	-0.19	0.57
AT1G10060	branched-chain amino acid transaminase 1	1	chr1	3284239	3287107	5.37852	0.228755	5.22159	0.184792	5.11353	0.131608	5.52932	0.655647	5.43696	0.312869	5.29168	0.365357	5.45386	0.28951	5.79377	0.100788	5.30122	0.155011	-0.16	0.66	-0.26	0.39	-0.09	0.97	-0.24	0.87	0.34	0.44	-0.15	0.75
AT1G10070	branched-chain amino acid transaminase 2	1	chr1	3288087	3290471	9.08286	0.690146	8.38675	0.467258	8.21599	0.533528	8.97514	0.487015	9.6433	0.613287	9.28316	0.109418	8.70582	0.188018	9.24892	0.113268	8.65776	0.0951984	-0.7	0.48	-0.87	0.4	0.67	0.71	0.31	0.74	0.54	0.16	-0.05	0.89
AT1G10090	Early-responsive to dehydration stress protein (ERD4)	0	chr1	3290311	3296198	9.63982	0.0887267	9.90826	0.0697798	9.59295	0.0462461	9.83422	0.112179	9.56272	0.0947573	9.5701	0.040643	9.75518	0.0234393	9.45475	0.101493	9.65013	0.0941825	0.27	0.12	-0.05	0.7	-0.27	0.37	-0.26	0.28	-0.3	0.14	-0.11	0.44
AT1G10095	Protein prenylyltransferase superfamily protein	0	chr1	3297324	3300443	7.56342	0.117672	7.66922	0.159612	7.59942	0.133082	7.70179	0.134175	7.6779	0.0547512	7.67238	0.114192	7.66116	0.123224	7.57643	0.0775493	7.4933	0.168972	0.11	0.66	0.04	0.89	-0.02	0.95	-0.03	0.94	-0.08	0.7	-0.17	0.58
AT1G10100		0	chr1	3300697	3301489	6.18796	0.189005	6.2651	0.175522	6.32111	0.164477	6.40484	0.044975	6.39542	0.0528046	6.20747	0.137103	6.36938	0.142638	6.30079	0.210117	6.36455	0.0509744	0.08	0.82	0.13	0.66	-0.01	0.96	-0.2	0.46	-0.07	0.86	0	0.99
AT_1_-_2_3302194-3302295		0	chr1	3302192	3302293	5.52265	0.310086	5.53493	0.415096	5.89018	0.058381	5.51203	0.278319	5.47938	0.177009	5.51545	0.152716	5.31792	0.343419	5.53556	0.297167	5.82698	0.632253	0.01	0.99	0.37	0.33	-0.03	0.97	0	1	0.22	0.75	0.51	0.63
AT1G10110	F-box family protein	1	chr1	3302742	3304092	7.03482	0.237208	6.95199	0.196681	6.83994	0.0929804	7.05749	0.163476	6.90018	0.157354	6.97591	0.117094	7.24158	0.103939	6.96941	0.169332	7.12101	0.0521906	-0.08	0.84	-0.19	0.51	-0.16	0.78	-0.08	0.83	-0.27	0.35	-0.12	0.46
AT1G10120	basic helix-loop-helix (bHLH) DNA-binding superfamily protein	0	chr1	3304039	3306824	10.6653	0.153809	10.4151	0.0506845	10.6257	0.124314	10.5945	0.264713	10.8474	0.190939	10.8723	0.0927016	10.4947	0.0453921	10.7772	0.0840786	10.8492	0.263714	-0.25	0.23	-0.04	0.89	0.25	0.74	0.28	0.59	0.28	0.13	0.35	0.36
AT1G10130	endoplasmic reticulum-type calcium-transporting ATPase 3	1	chr1	3310930	3322213	9.41367	0.210594	9.30851	0.115984	9.55722	0.121424	9.51447	0.260521	9.60695	0.126897	9.66749	0.0561124	9.51654	0.115329	9.72041	0.114673	9.6782	0.190537	-0.11	0.72	0.14	0.62	0.09	0.9	0.15	0.76	0.2	0.39	0.16	0.62
AT1G10140	Uncharacterised conserved protein UCP031279	0	chr1	3322802	3323548	13.9949	0.113727	14.2246	0.0785351	14.2605	0.183051	13.8479	0.249548	13.7995	0.112714	13.9623	0.0302019	14.0337	0.120833	14.0496	0.12542	13.9776	0.180136	0.23	0.21	0.27	0.31	-0.05	0.95	0.11	0.8	0.02	0.96	-0.06	0.87
AT1G10150	Carbohydrate-binding protein	1	chr1	3325824	3327614	9.98739	0.175269	10.2979	0.190318	10.294	0.117068	9.68478	0.255871	9.65309	0.174048	9.80737	0.187024	9.89525	0.161779	9.90631	0.159112	9.65149	0.173743	0.31	0.32	0.31	0.25	-0.03	0.97	0.12	0.83	0.01	0.98	-0.24	0.47
AT1G10155	phloem protein 2-A10	0	chr1	3327637	3328448	8.17864	0.12071	8.39988	0.12569	8.48421	0.253269	7.76588	0.430412	7.98789	0.168748	8.28782	0.937319	8.0448	0.28422	8.16399	0.35692	7.71184	0.396319	0.22	0.3	0.31	0.36	0.22	0.85	0.52	0.79	0.12	0.87	-0.33	0.64
AT1G10160	transposable element gene	1	chr1	3328971	3333470	9.1653	0.159853	9.39832	0.177577	9.48302	0.128604	9.30308	0.155158	9.08988	0.282901	9.1042	0.195578	9.15036	0.157853	8.93202	0.193046	8.94478	0.395106	0.23	0.41	0.32	0.23	-0.21	0.79	-0.2	0.67	-0.22	0.55	-0.21	0.74
AT1G10170	NF-X-like 1	0	chr1	3333595	3337491	10.7956	0.164809	10.7658	0.115608	11.254	0.217564	10.8529	0.194912	10.6946	0.181763	10.76	0.177533	10.951	0.197412	10.9043	0.0918485	10.8448	0.0442528	-0.03	0.92	0.46	0.21	-0.16	0.82	-0.09	0.85	-0.05	0.9	-0.11	0.72
AT1G10180		0	chr1	3338303	3341608	10.4708	0.0631891	10.3053	0.0691802	10.339	0.126919	10.2026	0.169391	10.4001	0.174185	10.279	0.133082	10.2136	0.0853216	10.3946	0.255932	10.2616	0.165	-0.17	0.19	-0.13	0.42	0.2	0.73	0.08	0.85	0.18	0.66	0.05	0.87
AT1G10190	Protein of Unknown Function (DUF239)	0	chr1	3343686	3345632	5.33271	0.31749	5.1072	0.159725	4.95539	0.319638	5.04865	0.135604	5.08998	0.180177	4.97528	0.170536	5.17025	0.286955	5.21001	0.357953	4.93643	0.285535	-0.23	0.59	-0.38	0.47	0.04	0.95	-0.07	0.86	0.04	0.96	-0.23	0.7
AT1G10200	GATA type zinc finger transcription factor family protein	0	chr1	3346390	3347885	12.3373	0.134545	12.153	0.0713118	12.0145	0.0791692	12.6328	0.112429	12.6374	0.164759	12.6074	0.105239	12.2775	0.177155	12.2083	0.0761109	12.1427	0.0762736	-0.18	0.32	-0.32	0.17	0	0.99	-0.03	0.94	-0.07	0.81	-0.13	0.63
AT1G10210	mitogen-activated protein kinase 1	1	chr1	3349219	3351180	7.78669	0.101449	7.82793	0.229659	7.70427	0.133787	7.94759	0.0614682	7.96674	0.206714	8.00829	0.206248	7.95538	0.138791	8.00952	0.201199	7.78698	0.124074	0.04	0.91	-0.08	0.69	0.02	0.98	0.06	0.88	0.05	0.89	-0.17	0.52
AT1G10220		1	chr1	3352159	3354856	5.23532	0.122474	5.26794	0.110831	5.43319	0.242649	5.81519	0.25163	5.63062	0.194143	5.65137	0.124181	5.65112	0.0713522	5.47721	0.240371	5.56235	0.219758	0.03	0.89	0.2	0.53	-0.18	0.82	-0.16	0.76	-0.17	0.65	-0.09	0.8
AT1G10230	SKP1-like 18	1	chr1	3355571	3356359	10.0138	0.0556353	9.98592	0.0819955	10.0511	0.042081	9.96917	0.130798	9.79582	0.232343	9.78725	0.0937201	9.98627	0.0896601	9.96413	0.151433	10.0383	0.0561173	-0.03	0.84	0.04	0.65	-0.17	0.8	-0.18	0.53	-0.02	0.94	0.05	0.74
AT1G10240	FAR1-related sequence 11	0	chr1	3356680	3359838	8.38268	0.162102	8.32423	0.0711413	8.37099	0.179293	8.3943	0.177755	8.45581	0.146481	8.56421	0.0686598	8.46502	0.0697846	8.72526	0.0709416	8.71039	0.211839	-0.06	0.8	-0.01	0.98	0.06	0.92	0.17	0.63	0.26	0.15	0.25	0.44
AT1G10250		0	chr1	3360087	3360508	6.06476	0.11124	5.96965	0.153534	6.07734	0.0641755	5.77672	0.0887141	5.88617	0.109878	6.0262	0.299264	5.9151	0.0713319	5.89482	0.0951668	5.99977	0.0857295	-0.1	0.68	0.01	0.95	0.11	0.74	0.25	0.67	-0.02	0.92	0.08	0.6
AT1G10260	transposable element gene	0	chr1	3360526	3361247	5.13403	0.21176	5.16531	0.267231	5.13132	0.2329	5.2338	0.298033	5.03566	0.26938	5.32072	0.0947839	4.98599	0.161564	5.2132	0.327171	5.13802	0.216842	0.03	0.95	0	1	-0.2	0.85	0.09	0.89	0.23	0.68	0.15	0.7
AT1G10270	glutamine-rich protein 23	1	chr1	3363504	3366488	8.13304	0.205385	8.15241	0.0570796	8.10456	0.197174	8.15156	0.31644	7.68188	0.238278	8.1036	0.211882	8.2523	0.117282	8.11555	0.229216	8.32708	0.18792	0.02	0.95	-0.03	0.95	-0.47	0.57	-0.05	0.95	-0.14	0.73	0.07	0.83
AT1G10280	Core-2/I-branching beta-1,6-N-acetylglucosaminyltransferase family protein	0	chr1	3366493	3369095	7.00124	0.178573	6.82774	0.156685	6.92174	0.0834539	7.38286	0.149951	7.32746	0.188916	7.37651	0.0692296	6.92499	0.245141	6.86694	0.178391	6.99407	0.28633	-0.17	0.54	-0.08	0.75	-0.06	0.93	-0.01	0.99	-0.06	0.91	0.07	0.91
AT1G10290	dynamin-like protein 6	1	chr1	3370558	3377463	10.1508	0.270325	10.1796	0.177818	10.0724	0.115144	10.5589	0.225358	10.3594	0.168453	10.4881	0.0751516	10.4678	0.249908	10.4204	0.137267	10.4818	0.222077	0.03	0.95	-0.08	0.84	-0.2	0.77	-0.07	0.88	-0.05	0.92	0.01	0.98
AT1G10300	Nucleolar GTP-binding protein	1	chr1	3378142	3380226	6.16517	0.131444	6.18348	0.179745	6.09138	0.156065	6.19486	0.0674155	6.20584	0.158905	6.39879	0.141574	6.28694	0.107664	6.22092	0.107995	6.40997	0.172979	0.02	0.96	-0.07	0.78	0.01	0.98	0.2	0.48	-0.07	0.78	0.12	0.68
AT1G10310	NAD(P)-binding Rossmann-fold superfamily protein	0	chr1	3381601	3383914	10.7029	0.109748	10.6867	0.0796832	10.7276	0.101845	10.5262	0.115183	10.8311	0.0677661	10.6845	0.0936537	10.7691	0.197591	10.815	0.116677	10.7951	0.0302741	-0.02	0.94	0.02	0.91	0.3	0.28	0.16	0.56	0.05	0.9	0.03	0.94
AT1G10320	Zinc finger C-x8-C-x5-C-x3-H type family protein	0	chr1	3384164	3388373	9.09584	0.0960356	8.98167	0.0796593	9.11286	0.183249	9.16049	0.200974	9.23248	0.0565808	9.38339	0.200506	9.24014	0.0519694	9.20226	0.211574	9.29327	0.164148	-0.11	0.44	0.02	0.96	0.07	0.89	0.22	0.67	-0.04	0.92	0.05	0.84
AT1G10330	Tetratricopeptide repeat (TPR)-like superfamily protein	1	chr1	3388747	3390150	8.14841	0.186789	8.27936	0.0573863	8.17133	0.121472	8.23357	0.159908	8.03061	0.154023	8.11076	0.144216	8.2587	0.113639	8.03915	0.0886622	8.13188	0.108331	0.13	0.57	0.02	0.95	-0.2	0.68	-0.12	0.76	-0.22	0.31	-0.13	0.57
AT1G10340	Ankyrin repeat family protein	0	chr1	3390322	3392571	7.21188	0.117043	7.40177	0.062876	7.05115	0.0763257	7.43517	0.269195	7.40852	0.281424	7.0198	0.108079	7.68949	0.297536	7.08434	0.116767	6.98875	0.210333	0.19	0.25	-0.16	0.33	-0.03	0.98	-0.42	0.44	-0.61	0.24	-0.7	0.23
AT1G10350	DNAJ heat shock family protein	0	chr1	3393407	3395055	9.93125	0.0968284	9.94881	0.0825933	9.94048	0.112591	9.91696	0.0723712	9.91557	0.0446695	9.91061	0.0873757	9.81221	0.0782828	9.8443	0.0267339	9.75819	0.0575343	0.02	0.93	0.01	0.97	0	1	-0.01	0.98	0.03	0.8	-0.05	0.71
AT1G10360	glutathione S-transferase TAU 18	0	chr1	3395558	3396849	8.52181	0.206956	8.53994	0.242988	8.51499	0.0781697	8.6655	0.174912	8.33882	0.146483	8.59706	0.145008	10.3353	0.121862	10.1679	0.125266	9.92798	0.204897	0.02	0.97	-0.01	0.98	-0.33	0.49	-0.07	0.88	-0.17	0.51	-0.41	0.27
AT1G10370	Glutathione S-transferase family protein	0	chr1	3397081	3398358	12.928	0.68814	13.8049	0.12211	12.9854	0.0667767	12.1801	0.38336	11.5681	0.460286	11.3909	0.244983	11.9051	0.231292	11.4932	0.1361	11.187	0.200622	0.88	0.3	0.06	0.96	-0.61	0.63	-0.79	0.37	-0.41	0.31	-0.72	0.17
AT1G10380	Putative membrane lipoprotein	1	chr1	3400606	3402324	8.34626	0.211887	8.46688	0.217209	8.37051	0.156749	8.3755	0.222094	8.59719	0.285732	8.67396	0.153064	8.85957	0.193459	9.16724	0.143267	9.12908	0.237188	0.12	0.75	0.02	0.95	0.22	0.81	0.3	0.54	0.31	0.38	0.27	0.54
AT1G10385	Vps51/Vps67 family (components of vesicular transport) protein	1	chr1	3403224	3405856	6.31975	0.132819	6.25319	0.287851	6.4828	0.0492439	6.075	0.314916	5.95932	0.0323148	6.19965	0.10294	6.10571	0.396232	5.87551	0.19443	6.05941	0.0957368	-0.07	0.88	0.16	0.33	-0.12	0.89	0.12	0.84	-0.23	0.73	-0.05	0.95
AT1G10390	Nucleoporin autopeptidase	0	chr1	3407024	3412843	11.4749	0.102291	11.6886	0.158766	11.754	0.10409	11.5424	0.184356	11.3992	0.264482	11.6478	0.269343	11.559	0.109206	11.264	0.208399	11.5258	0.107524	0.21	0.35	0.28	0.18	-0.14	0.86	0.11	0.87	-0.3	0.39	-0.03	0.89
AT1G10400	UDP-Glycosyltransferase superfamily protein	0	chr1	3414852	3416358	8.25671	0.285927	8.00129	0.120315	8.2089	0.254982	8.28163	0.225905	8.09458	0.216436	8.16056	0.165625	7.40993	0.180501	7.36626	0.120158	7.57361	0.30607	-0.26	0.49	-0.05	0.93	-0.19	0.82	-0.12	0.81	-0.04	0.9	0.16	0.76
AT1G10410	Protein of unknown function (DUF1336)	0	chr1	3416680	3419639	11.6463	0.015984	11.5775	0.0590146	11.6011	0.0567186	11.6564	0.0785604	11.7738	0.127509	11.7699	0.159732	11.3745	0.0725629	11.5427	0.115526	11.4731	0.087647	-0.07	0.35	-0.05	0.51	0.12	0.74	0.11	0.73	0.17	0.4	0.1	0.54
AT_1_-_1_3422990-3423094		0	chr1	3422989	3423093	5.01083	0.180848	5.08665	0.213351	5.23271	0.0906059	5.38338	0.12993	5.19309	0.636963	5.6309	0.289903	5.19449	0.200716	5.06671	0.243319	4.96362	0.153285	0.08	0.84	0.22	0.35	-0.19	0.91	0.25	0.67	-0.13	0.79	-0.23	0.52
AT1G10417		0	chr1	3424186	3427457	7.32774	0.133036	7.13525	0.140724	7.07788	0.140897	7.34511	0.0911891	7.3158	0.158682	7.49758	0.0601275	6.96002	0.0614469	7.06213	0.111619	7.17109	0.0342875	-0.19	0.4	-0.25	0.29	-0.03	0.96	0.15	0.45	0.1	0.59	0.21	0.11
AT1G10419		1	chr1	3428031	3428425	5.03188	0.133099	4.86901	0.22483	5.18338	0.202777	4.73961	0.208428	4.88257	0.288971	4.76678	0.16451	4.60339	0.235994	4.72071	0.082798	4.73866	0.234832	-0.16	0.6	0.15	0.59	0.14	0.88	0.03	0.96	0.12	0.76	0.14	0.79
AT1G10430	protein phosphatase 2A-2	0	chr1	3428478	3430633	10.6792	0.118965	10.6598	0.108242	10.6181	0.0895111	10.6557	0.114643	10.5726	0.113966	10.6097	0.134656	10.4551	0.169557	10.4705	0.127213	10.4175	0.133401	-0.02	0.94	-0.06	0.74	-0.08	0.84	-0.05	0.89	0.02	0.97	-0.04	0.92
AT1G10440	pre-tRNA	0	chr1	3431185	3431256	12.1228	0.176461	12.2819	0.0808586	11.9753	0.0910973	12.2111	0.201083	11.9036	0.164851	11.8915	0.226293	12.1792	0.336899	12.0282	0.241534	12.12	0.252876	0.16	0.49	-0.15	0.52	-0.31	0.57	-0.32	0.56	-0.15	0.81	-0.06	0.94
AT1G10450	SIN3-like 6	1	chr1	3431780	3438370	8.29219	0.082443	8.48284	0.19843	8.48973	0.0782969	8.57242	0.281055	8.48004	0.25605	8.57248	0.155006	8.64357	0.103713	8.39944	0.322913	8.44516	0.120209	0.19	0.45	0.2	0.2	-0.09	0.93	0	1	-0.24	0.63	-0.2	0.38
AT1G10455		1	chr1	3438555	3439013	5.08833	0.205466	5.17434	0.244992	5.08454	0.116595	5.45639	0.56231	5.301	0.186988	5.33677	0.0734579	5.38702	0.201345	5.38584	0.120784	5.18782	0.242039	0.09	0.84	0	0.99	-0.16	0.92	-0.12	0.92	0	1	-0.2	0.67
AT1G10460	germin-like protein 7	0	chr1	3439322	3440320	7.35981	0.166396	7.60977	0.0612184	7.40002	0.0863767	7.48637	0.243981	7.10883	0.204302	7.17466	0.185204	7.81611	0.791374	7.51866	0.0332585	7.43221	0.155705	0.25	0.26	0.04	0.88	-0.38	0.57	-0.31	0.58	-0.3	0.81	-0.38	0.75
AT1G10470	response regulator 4	0	chr1	3442327	3443957	7.35825	0.250153	7.38771	0.184622	7.23298	0.110378	8.52504	0.168495	8.13544	0.427032	8.15105	0.119583	8.43635	0.12207	8.60673	0.133168	8.47041	0.0793182	0.03	0.95	-0.13	0.71	-0.39	0.71	-0.37	0.36	0.17	0.52	0.03	0.88
AT1G10480	zinc finger protein 5	1	chr1	3449691	3451226	4.85276	0.156918	4.96537	0.201824	4.64579	0.155585	4.94723	0.238638	4.73937	0.44637	5.02795	0.410367	4.77252	0.108253	5.1025	0.167855	5.17324	0.560284	0.11	0.72	-0.21	0.42	-0.21	0.87	0.08	0.94	0.33	0.28	0.4	0.63
AT1G10490	Domain of unknown function (DUF1726) ;Putative ATPase (DUF699)	1	chr1	3453228	3460620	5.79829	0.0450875	5.8827	0.0811538	5.83889	0.115573	5.53367	0.187553	5.67068	0.215557	5.71804	0.200521	5.8144	0.116156	5.822	0.23366	5.7708	0.102582	0.08	0.44	0.04	0.8	0.14	0.85	0.18	0.72	0.01	0.99	-0.04	0.86
AT1G10500	chloroplast-localized ISCA-like protein	0	chr1	3460000	3461485	11.8652	0.216393	11.8802	0.110364	11.8719	0.0937389	12.0037	0.129076	12.1425	0.0897532	12.14	0.0445081	12.1273	0.104483	12.1514	0.0744006	12.0146	0.206697	0.01	0.97	0.01	0.99	0.14	0.7	0.14	0.58	0.02	0.91	-0.11	0.74
AT1G10510	RNI-like superfamily protein	1	chr1	3461635	3465786	9.32281	0.101457	9.28289	0.0970283	9.24222	0.0709072	9.48538	0.0610973	9.31877	0.054195	9.45851	0.113145	9.55137	0.0908506	9.5856	0.10616	9.53154	0.0784904	-0.04	0.83	-0.08	0.58	-0.17	0.33	-0.03	0.92	0.03	0.88	-0.02	0.92
AT1G10520	DNA polymerase lambda (POLL)	1	chr1	3465964	3469248	6.38556	0.0800211	6.40212	0.102166	6.14722	0.205896	6.60776	0.45214	6.23021	0.282077	6.38145	0.332139	6.7201	0.0868896	6.68665	0.197272	6.68699	0.32037	0.02	0.93	-0.24	0.36	-0.38	0.77	-0.23	0.83	-0.03	0.93	-0.03	0.96
AT1G10522		1	chr1	3469580	3471488	7.65871	0.222503	7.80502	0.0947189	7.50034	0.0739124	7.84527	0.06745	7.75932	0.130977	7.69594	0.0799098	7.70003	0.18289	7.64053	0.128764	7.60387	0.211283	0.15	0.61	-0.16	0.56	-0.09	0.82	-0.15	0.44	-0.06	0.87	-0.1	0.82
AT1G10530		0	chr1	3471456	3472672	7.26388	0.0959928	7.49811	0.214322	7.34213	0.154235	7.6517	0.183019	7.7315	0.223408	7.75987	0.143552	7.10927	0.189652	7.33026	0.109088	7.43949	0.134736	0.23	0.4	0.08	0.73	0.08	0.92	0.11	0.8	0.22	0.48	0.33	0.33
AT_1_+_2_3473460-3473603		1	chr1	3473459	3473602	4.86301	0.271535	5.02018	0.134242	5.07605	0.215729	5.18604	0.157558	5.12948	0.414413	5.44238	0.551627	5.22694	0.18905	5.27612	0.0742746	5.23282	0.109378	0.16	0.67	0.21	0.6	-0.06	0.97	0.26	0.81	0.05	0.88	0.01	0.99
AT1G10538		1	chr1	3474515	3474765	5.33995	0.211025	5.25154	0.157623	5.31958	0.117021	5.24636	0.152593	5.2113	0.171722	5.51466	0.309563	5.37358	0.176509	5.33218	0.137267	5.0995	0.178946	-0.09	0.8	-0.02	0.96	-0.04	0.96	0.27	0.67	-0.04	0.91	-0.27	0.44
AT1G10540	nucleobase-ascorbate transporter 8	0	chr1	3474864	3477927	6.17658	0.236137	5.86995	0.171047	5.8356	0.115592	6.62988	0.285238	7.11307	0.269328	6.53292	0.0430992	6.61429	0.0995269	7.03292	0.224857	6.64033	0.220883	-0.31	0.38	-0.34	0.29	0.48	0.56	-0.1	0.86	0.42	0.27	0.03	0.95
AT1G10550	xyloglucan:xyloglucosyl transferase 33	0	chr1	3479153	3480988	8.44348	0.53687	8.37613	0.151626	8.31266	0.336779	9.81557	0.256652	9.18016	0.29958	9.45283	0.141024	9.2223	0.0944773	9.30055	0.231328	8.95509	0.177721	-0.07	0.94	-0.13	0.88	-0.64	0.43	-0.36	0.5	0.08	0.84	-0.27	0.36
AT_1_+_0_3482653-3482895		1	chr1	3482652	3482894	5.24382	0.227015	4.97138	0.233622	5.02996	0.0970947	4.92997	0.127921	5.14737	0.243683	5.08028	0.203196	5.2186	0.371824	4.88116	0.202128	5.05966	0.121872	-0.27	0.48	-0.21	0.45	0.22	0.74	0.15	0.74	-0.34	0.59	-0.16	0.79
AT1G10560	plant U-box 18	1	chr1	3484580	3486965	8.79634	0.143632	8.75447	0.113014	8.57886	0.211518	8.74446	0.138815	9.09715	0.0955466	8.89532	0.106984	8.80511	0.101554	8.7989	0.112116	8.81072	0.18307	-0.04	0.87	-0.22	0.46	0.35	0.32	0.15	0.64	-0.01	0.98	0.01	0.99
AT1G10570	Cysteine proteinases superfamily protein	1	chr1	3487584	3491277	8.20062	0.152003	8.32006	0.0187592	8.21854	0.0589163	8.51698	0.14783	8.5207	0.088124	8.60521	0.13446	8.56163	0.0731226	8.59139	0.131995	8.49064	0.102293	0.12	0.51	0.02	0.94	0	0.99	0.09	0.81	0.03	0.91	-0.07	0.7
AT1G10580	Transducin/WD40 repeat-like superfamily protein	0	chr1	3491281	3493737	10.8601	0.0698046	10.9257	0.0471782	10.8512	0.0583332	10.9462	0.173018	10.6505	0.190028	10.8037	0.0311468	10.7464	0.0817376	10.598	0.0632086	10.7048	0.0784627	0.07	0.51	-0.01	0.95	-0.3	0.58	-0.14	0.66	-0.15	0.33	-0.04	0.81
AT1G10585	basic helix-loop-helix (bHLH) DNA-binding superfamily protein	0	chr1	3493940	3495144	8.75094	0.294084	8.94484	0.594394	7.82695	1.03922	10.1412	0.721043	8.05583	1.57791	8.50362	0.586077	9.16864	0.328284	8.66794	0.441966	8.86865	0.565773	0.19	0.83	-0.92	0.46	-2.09	0.57	-1.64	0.37	-0.5	0.53	-0.3	0.76
AT1G10586	basic helix-loop-helix (bHLH) DNA-binding superfamily protein	0	chr1	3496928	3499439	5.55642	0.155253	5.58765	0.100635	5.55459	0.122386	5.77852	0.150525	5.49021	0.0787384	5.64054	0.182575	5.82207	0.0317734	5.63014	0.264008	5.73797	0.198819	0.03	0.91	0	1	-0.29	0.41	-0.14	0.76	-0.19	0.63	-0.08	0.78
AT1G10588	Gibberellin-regulated family protein	1	chr1	3501145	3501904	5.32515	0.166168	5.21868	0.206954	5.33742	0.138986	5.44665	0.278172	5.11457	0.190267	5.2839	0.0546005	5.26328	0.210531	5.22922	0.163729	5.328	0.158015	-0.11	0.75	0.01	0.97	-0.33	0.65	-0.16	0.76	-0.03	0.94	0.06	0.88
AT1G10590	Nucleic acid-binding, OB-fold-like protein	0	chr1	3502004	3503457	13.8433	0.0680325	13.7428	0.0887334	13.6589	0.0832772	13.8485	0.0538431	13.7972	0.0748035	13.7836	0.129261	13.6967	0.0675427	13.8103	0.066206	13.7176	0.139231	-0.1	0.45	-0.18	0.21	-0.05	0.83	-0.06	0.8	0.11	0.41	0.02	0.94
AT1G10600	associated molecule with the SH3 domain of STAM 2	1	chr1	3503704	3505502	9.37167	0.239773	9.07573	0.0812508	9.00215	0.0606758	9.32048	0.111559	9.61771	0.101319	9.40809	0.187129	9.23937	0.148108	9.60017	0.0813138	9.27951	0.0533959	-0.3	0.33	-0.37	0.24	0.3	0.34	0.09	0.83	0.36	0.2	0.04	0.87
AT1G10610	basic helix-loop-helix (bHLH) DNA-binding superfamily protein	1	chr1	3506186	3509006	6.98546	0.171539	6.82336	0.306883	6.68128	0.190236	6.91538	0.263826	6.95265	0.203981	6.82143	0.197248	6.94138	0.255647	6.85364	0.21922	6.81039	0.244898	-0.16	0.71	-0.3	0.32	0.04	0.97	-0.09	0.88	-0.09	0.87	-0.13	0.81
AT1G10620	Protein kinase superfamily protein	0	chr1	3509001	3511975	5.52839	0.0535465	5.4244	0.0890855	5.54438	0.0402671	5.46365	0.124667	5.45566	0.165415	5.33793	0.142591	5.46353	0.0865565	5.53745	0.129427	5.28986	0.164901	-0.1	0.4	0.02	0.86	-0.01	0.99	-0.13	0.72	0.07	0.76	-0.17	0.51
AT1G10630	ADP-ribosylation factor A1F	0	chr1	3512795	3514729	6.92364	0.102275	7.02515	0.0535406	7.08816	0.0722248	7.13592	0.257138	7.05654	0.325208	7.16338	0.18257	7.13851	0.161875	7.14481	0.233749	7.35135	0.130767	0.1	0.46	0.16	0.29	-0.08	0.95	0.03	0.97	0.01	0.99	0.21	0.47
AT1G10640	Pectin lyase-like superfamily protein	0	chr1	3515365	3517888	5.38971	0.26943	5.36707	0.263476	5.58884	0.227883	5.37811	0.367475	5.44685	0.274616	5.54874	0.197954	5.34878	0.349338	5.16887	0.163782	5.20576	0.122774	-0.02	0.97	0.2	0.63	0.07	0.96	0.17	0.83	-0.18	0.76	-0.14	0.8
AT1G10650	SBP (S-ribonuclease binding protein) family protein	0	chr1	3524018	3526346	7.96376	0.0526256	7.92243	0.168888	7.91829	0.0983272	7.83095	0.262423	7.82877	0.208822	7.705	0.0706961	7.52807	0.0898322	7.54955	0.115543	7.6925	0.125392	-0.04	0.87	-0.05	0.74	0	1	-0.13	0.8	0.02	0.93	0.16	0.45
AT1G10652		1	chr1	3527709	3527831	5.32034	0.0499769	5.23345	0.162816	5.32965	0.2252	5.39395	0.148969	5.313	0.0905268	5.47127	0.420289	5.31713	0.137939	5.23353	0.267545	5.33848	0.154305	-0.09	0.68	0.01	0.98	-0.08	0.86	0.08	0.93	-0.08	0.86	0.02	0.95
AT1G10657	Plant protein 1589 of unknown function	1	chr1	3530467	3531842	6.18934	0.0101736	6.04283	0.0834114	5.86779	0.134296	6.14042	0.137093	6.06204	0.303569	6.0092	0.262046	5.96525	0.376602	6.06764	0.510799	6.05712	0.341762	-0.15	0.19	-0.32	0.14	-0.08	0.93	-0.13	0.81	0.1	0.93	0.09	0.91
AT1G10660		1	chr1	3532424	3535131	9.79901	0.217268	9.53994	0.1284	9.48486	0.0794048	9.86393	0.157254	10.1462	0.12346	9.99418	0.104285	9.84793	0.181611	10.1585	0.176313	9.93672	0.0951373	-0.26	0.39	-0.31	0.27	0.28	0.49	0.13	0.71	0.31	0.4	0.09	0.77
AT1G10670	ATP-citrate lyase A-1	1	chr1	3535383	3538439	13.3185	0.194032	13.2438	0.0134844	13.3726	0.143557	12.9824	0.281926	13.2538	0.224872	13.1927	0.146862	12.9267	0.173605	13.2632	0.153327	13.1714	0.163549	-0.07	0.76	0.05	0.87	0.27	0.75	0.21	0.72	0.34	0.33	0.24	0.47
AT1G10680	P-glycoprotein 10	0	chr1	3538470	3543782	5.88127	0.0942954	5.77862	0.111296	5.82164	0.0927904	5.65417	0.297201	5.68542	0.0597754	5.56394	0.359352	5.72113	0.329016	5.66716	0.137609	5.6486	0.174088	-0.1	0.55	-0.06	0.71	0.03	0.97	-0.09	0.93	-0.05	0.93	-0.07	0.91
AT1G10682	other RNA	0	chr1	3544991	3545471	15.7623	0.157995	15.4655	0.0259393	15.4992	0.084796	15.8884	0.153172	15.6837	0.0335849	15.8969	0.126114	16.0183	0.0509731	15.9065	0.0909694	15.8751	0.0881497	-0.3	0.18	-0.26	0.25	-0.2	0.53	0.01	0.99	-0.11	0.46	-0.14	0.34
AT_1_-_0_3548019-3548135		0	chr1	3548018	3548134	4.81433	0.102206	4.67105	0.323121	4.75738	0.181914	4.89296	0.30783	4.62112	0.427111	4.67352	0.255795	5.00333	0.48055	4.84096	0.101113	4.57552	0.181978	-0.14	0.74	-0.06	0.84	-0.27	0.84	-0.22	0.77	-0.16	0.83	-0.43	0.56
AT1G10690		0	chr1	3549992	3550632	10.0977	0.304948	9.77854	0.124721	10.2061	0.17557	9.85338	0.119342	10.0841	0.100233	9.92054	0.148271	9.8215	0.095825	9.98901	0.128979	9.90419	0.0725715	-0.32	0.42	0.11	0.81	0.23	0.47	0.07	0.85	0.17	0.47	0.08	0.64
AT1G10700	phosphoribosyl pyrophosphate (PRPP) synthase 3	1	chr1	3554104	3556503	11.0979	0.0496628	11.1178	0.0444043	11.3761	0.100371	11.0811	0.155233	10.8669	0.0757542	10.9056	0.0675019	10.62	0.0965812	10.6545	0.116743	10.695	0.136523	0.02	0.82	0.28	0.13	-0.21	0.55	-0.18	0.57	0.03	0.89	0.07	0.76
AT1G10705		1	chr1	3557114	3557457	4.98416	0.13446	5.14334	0.281851	5.1733	0.138174	5.18606	0.214947	5.18041	0.147037	5.23369	0.284892	5.16533	0.223977	5.20573	0.150256	5.27761	0.0825787	0.16	0.68	0.19	0.4	-0.01	0.99	0.05	0.95	0.04	0.93	0.11	0.75
AT1G10710	poor homologous synapsis 1	1	chr1	3558358	3561634	5.64156	0.0561921	5.56594	0.0919437	5.50999	0.0534466	5.82914	0.120043	5.79185	0.118369	5.74337	0.0780293	5.75487	0.213753	5.83198	0.23758	5.86061	0.138851	-0.08	0.55	-0.13	0.21	-0.04	0.94	-0.09	0.75	0.08	0.88	0.11	0.78
AT1G10717		1	chr1	3562180	3562554	5.56705	0.17787	5.62705	0.295371	5.44779	0.0878923	5.53024	0.120735	5.52963	0.335048	5.41822	0.257412	5.44777	0.19944	5.64755	0.168386	5.50627	0.273566	0.06	0.9	-0.12	0.61	0	1	-0.11	0.83	0.2	0.61	0.06	0.92
AT1G10720	BSD domain-containing protein	1	chr1	3562952	3564759	10.047	0.0992279	10.0367	0.0500095	10.021	0.0709743	10.2249	0.107135	10.2049	0.0849389	10.1656	0.0823967	10.235	0.0486428	10.1004	0.0576502	10.1214	0.13184	-0.01	0.95	-0.03	0.88	-0.02	0.96	-0.06	0.81	-0.13	0.25	-0.11	0.57
AT1G10730	Clathrin adaptor complexes medium subunit family protein	1	chr1	3565463	3567779	7.44475	0.132716	7.57129	0.0275947	7.43726	0.0974974	7.76428	0.147199	7.77613	0.136249	7.8747	0.104343	8.29152	0.052213	8.22254	0.10202	7.98647	0.211542	0.13	0.43	-0.01	0.98	0.01	0.98	0.11	0.75	-0.07	0.69	-0.31	0.34
AT1G10740	alpha/beta-Hydrolases superfamily protein	0	chr1	3567905	3570838	10.7589	0.0796117	10.5065	0.0304308	10.893	0.0664549	9.7696	0.29463	9.95724	0.391934	9.96935	0.196096	9.85765	0.233412	9.9838	0.119828	9.96441	0.155978	-0.25	0.09	0.13	0.29	0.19	0.88	0.2	0.76	0.13	0.75	0.11	0.8
AT1G10745	Maternally expressed gene (MEG) family protein	1	chr1	3572710	3573066	6.19007	0.0646203	5.86029	0.166803	5.87372	0.12447	6.02445	0.321477	6.12326	0.252635	6.29841	0.559863	6.07551	0.0523065	6.1096	0.0357285	6.25814	0.119024	-0.33	0.18	-0.32	0.15	0.1	0.93	0.27	0.82	0.03	0.72	0.18	0.34
AT1G10747	Maternally expressed gene (MEG) family protein	1	chr1	3574312	3574830	5.67516	0.0944999	5.68093	0.168573	5.55282	0.198115	5.31068	0.358799	5.31851	0.253948	5.34029	0.151413	5.4432	0.1438	5.40418	0.159462	5.40911	0.291323	0.01	0.98	-0.12	0.64	0.01	1	0.03	0.97	-0.04	0.91	-0.03	0.95
AT1G10750	Protein of Unknown Function (DUF239)	0	chr1	3574807	3578474	6.95314	0.0442771	7.19566	0.169086	7.06613	0.100544	7.26855	0.0541509	7.26364	0.085143	7.43839	0.154007	7.06742	0.315864	7.02162	0.115072	7.13499	0.188893	0.24	0.26	0.11	0.38	0	0.99	0.17	0.57	-0.05	0.94	0.07	0.91
AT1G10760	Pyruvate phosphate dikinase, PEP/pyruvate binding domain	0	chr1	3581034	3590928	11.8438	0.229243	11.8394	0.100223	11.4906	0.134209	12.0798	0.149336	11.8716	0.103529	11.8448	0.110967	11.7335	0.11469	11.3707	0.19156	11.3831	0.10861	0	0.99	-0.35	0.28	-0.21	0.59	-0.23	0.49	-0.36	0.29	-0.35	0.19
AT1G10770	Plant invertase/pectin methylesterase inhibitor superfamily protein	0	chr1	3591633	3592411	8.54564	0.488776	8.35211	0.164503	7.05393	0.270748	9.63696	0.20713	8.43228	0.342844	8.13217	0.222535	9.34347	0.293009	8.52059	0.0773596	7.47979	0.238013	-0.19	0.77	-1.49	0.12	-1.2	0.2	-1.5	0.07	-0.82	0.14	-1.86	0.04
AT1G10780	F-box/RNI-like superfamily protein	0	chr1	3592746	3595077	8.48335	0.241256	8.49162	0.139215	8.39686	0.0694354	8.53018	0.342825	8.37209	0.254366	8.43069	0.0861659	7.93706	0.212793	8.37673	0.10413	8.15638	0.316739	0.01	0.98	-0.09	0.79	-0.16	0.89	-0.1	0.88	0.44	0.24	0.22	0.7
AT1G10790		1	chr1	3596360	3597847	7.23034	0.164028	6.89156	0.0455865	6.74948	0.0801708	7.40136	0.163173	6.93368	0.0762309	6.99601	0.152046	8.02466	0.0453445	7.26531	0.0775915	7.27539	0.130215	-0.34	0.16	-0.48	0.12	-0.47	0.25	-0.41	0.35	-0.76	0.02	-0.75	0.03
AT1G10800		0	chr1	3598158	3598591	7.51111	0.120452	7.73345	0.0944915	7.50916	0.0263611	7.69441	0.0768692	7.34106	0.177424	7.51379	0.146663	7.70735	0.179085	7.53032	0.0519455	7.35433	0.200574	0.22	0.25	0	0.99	-0.35	0.38	-0.18	0.55	-0.18	0.52	-0.35	0.36
AT1G10810	NAD(P)-linked oxidoreductase superfamily protein	1	chr1	3599271	3600877	8.09843	0.292079	7.63953	0.140075	7.79908	0.177754	8.23016	0.234788	7.75012	0.376695	7.74236	0.134707	7.80785	0.220774	7.97689	0.13271	7.73557	0.265827	-0.46	0.26	-0.3	0.45	-0.48	0.61	-0.49	0.36	0.17	0.66	-0.07	0.9
AT1G10820	Protein of unknown function (DUF3755)	0	chr1	3600910	3605076	6.82702	0.209089	6.86948	0.111403	6.58731	0.0228175	6.72784	0.343212	6.60036	0.228129	6.84129	0.0897224	6.53649	0.175627	6.40138	0.101944	6.43015	0.199884	0.04	0.9	-0.24	0.34	-0.13	0.91	0.11	0.87	-0.14	0.66	-0.11	0.79
AT1G10830	15-cis-zeta-carotene isomerase	0	chr1	3605576	3607493	8.43222	0.152213	8.31265	0.203197	8.51112	0.115925	8.2781	0.218903	8.44267	0.163378	8.5884	0.0731205	8.59287	0.186013	8.66703	0.109849	8.74561	0.113179	-0.12	0.7	0.08	0.74	0.16	0.81	0.31	0.47	0.07	0.82	0.15	0.63
AT1G10840	translation initiation factor 3 subunit H1	0	chr1	3607631	3610520	12.9093	0.0452605	12.8931	0.0976819	12.9596	0.071816	12.9079	0.0953887	12.8617	0.0938264	12.9944	0.130774	12.9794	0.123323	12.8404	0.124137	12.9105	0.125032	-0.02	0.92	0.05	0.61	-0.05	0.89	0.09	0.77	-0.14	0.59	-0.07	0.79
AT1G10850	Leucine-rich repeat protein kinase family protein	1	chr1	3611747	3614613	8.44527	0.0954884	8.59726	0.117419	8.69989	0.113566	8.35095	0.0545369	8.33592	0.115648	8.44823	0.181553	7.99745	0.0358197	7.99549	0.117853	8.11518	0.105863	0.15	0.4	0.25	0.21	-0.02	0.97	0.1	0.78	0	0.99	0.12	0.45
AT1G10865		0	chr1	3614513	3616159	12.3753	0.0967131	12.3026	0.0426369	12.2099	0.115919	12.2528	0.229258	12.3122	0.108141	12.2929	0.13028	12.3373	0.0806077	12.331	0.176634	12.3526	0.0458703	-0.07	0.56	-0.17	0.35	0.06	0.93	0.04	0.94	-0.01	0.99	0.02	0.92
AT1G10870	ARF-GAP domain 4	0	chr1	3616610	3623758	9.48865	0.0707218	9.37633	0.097556	9.50613	0.0812728	9.61635	0.16546	9.68053	0.0929414	9.675	0.1508	9.43333	0.200959	9.52479	0.11254	9.56852	0.169591	-0.11	0.43	0.02	0.91	0.06	0.9	0.06	0.89	0.09	0.79	0.14	0.73
AT1G10880	Core-2/I-branching beta-1,6-N-acetylglucosaminyltransferase family protein	0	chr1	3624035	3627082	5.4364	0.155663	5.42664	0.139937	5.55591	0.21557	5.13709	0.0552984	5.42968	0.270768	5.21773	0.0992591	5.21034	0.194853	5.27662	0.0545071	5.38752	0.710294	-0.01	0.98	0.12	0.71	0.29	0.62	0.08	0.71	0.07	0.83	0.18	0.88
AT1G10890		1	chr1	3627726	3630765	10.3173	0.104493	10.3527	0.0526261	10.4271	0.128181	10.4284	0.249257	10.5274	0.141805	10.5924	0.19695	10.401	0.110484	10.4418	0.120337	10.49	0.238092	0.04	0.82	0.11	0.57	0.1	0.89	0.16	0.78	0.04	0.88	0.09	0.83
AT1G10900	Phosphatidylinositol-4-phosphate 5-kinase family protein	0	chr1	3632234	3637141	10.2931	0.210381	10.4759	0.11192	10.3177	0.0555679	10.4015	0.161501	10.3522	0.147161	10.3991	0.128681	10.4468	0.138273	10.4814	0.188198	10.4216	0.024231	0.18	0.52	0.02	0.94	-0.05	0.93	0	1	0.03	0.93	-0.03	0.91
AT1G10910	Pentatricopeptide repeat (PPR) superfamily protein	1	chr1	3639878	3644162	7.67682	0.129653	7.74149	0.130244	7.60949	0.155903	8.04655	0.147844	7.90259	0.141069	8.0221	0.166671	8.1318	0.165924	7.946	0.240394	7.97052	0.0994094	0.06	0.79	-0.07	0.8	-0.14	0.77	-0.02	0.96	-0.19	0.68	-0.16	0.56
AT1G10920	NB-ARC domain-containing disease resistance protein	0	chr1	3644420	3647768	5.77917	0.225123	5.84501	0.258366	5.81788	0.171152	5.99575	0.148167	5.77785	0.103048	5.88278	0.143985	5.82461	0.112567	5.74849	0.0776606	5.78658	0.244521	0.07	0.89	0.04	0.93	-0.22	0.56	-0.11	0.77	-0.08	0.71	-0.04	0.94
AT1G10930	DNA helicase (RECQl4A)	0	chr1	3647894	3655590	8.34553	0.165554	8.50476	0.104845	8.45897	0.0948777	8.40891	0.121365	8.21773	0.137428	8.35753	0.131447	8.61473	0.0420958	8.37969	0.160953	8.46901	0.268498	0.16	0.49	0.11	0.61	-0.19	0.63	-0.05	0.88	-0.24	0.34	-0.15	0.72
AT1G10940	Protein kinase superfamily protein	0	chr1	3655777	3658608	9.34532	0.111951	9.72964	0.0803615	9.50209	0.0109155	9.52638	0.36163	9.19125	0.188234	9.45614	0.152675	9.45509	0.319696	9.05456	0.217552	9.28158	0.0545718	0.38	0.1	0.16	0.27	-0.34	0.73	-0.07	0.93	-0.4	0.47	-0.17	0.72
AT1G10950	transmembrane nine 1	1	chr1	3659209	3663984	8.6693	0.0653775	8.81267	0.0955703	8.88584	0.0479293	8.66025	0.121261	8.53169	0.137559	8.74004	0.152242	8.64582	0.145746	8.36872	0.073508	8.64063	0.158694	0.14	0.31	0.22	0.12	-0.13	0.78	0.08	0.82	-0.28	0.27	-0.01	0.99
AT1G10960	ferredoxin 1	1	chr1	3664386	3665039	10.7763	0.211442	11.0276	0.0581006	10.8932	0.0702972	10.8935	0.0609258	11.0482	0.143297	10.9084	0.225972	11.5693	0.135927	11.529	0.0544181	11.3966	0.0883453	0.25	0.34	0.12	0.66	0.15	0.64	0.01	0.98	-0.04	0.86	-0.17	0.45
AT1G10970	zinc transporter 4 precursor	0	chr1	3665087	3667139	10.3969	0.28512	9.40116	0.122645	9.43193	0.158782	10.8542	0.136305	10.5825	0.179204	10.3311	0.167889	10.6505	0.145663	10.1798	0.069098	10.1595	0.0348964	-1	0.08	-0.96	0.1	-0.27	0.57	-0.52	0.25	-0.47	0.13	-0.49	0.09
AT1G10980	Lung seven transmembrane receptor family protein	0	chr1	3667248	3669902	4.97207	0.182073	5.04081	0.0833112	5.04411	0.25328	4.9724	0.185645	5.02649	0.226476	4.82184	0.103692	5.1195	0.171641	4.90875	0.149883	4.78333	0.178564	0.07	0.79	0.07	0.87	0.05	0.95	-0.15	0.71	-0.21	0.53	-0.34	0.35
AT1G10990		0	chr1	3670278	3671187	8.40507	0.295534	8.13418	0.29516	8.35095	0.168947	8.47645	0.317269	8.31712	0.227922	8.25015	0.298846	8.54829	0.177838	8.54032	0.0949284	8.58877	0.147334	-0.27	0.59	-0.05	0.91	-0.16	0.88	-0.23	0.78	-0.01	0.98	0.04	0.92
AT1G11000	Seven transmembrane MLO family protein	0	chr1	3671756	3675979	10.9358	0.0653285	10.9128	0.0651047	11.1463	0.0460559	10.6516	0.11511	10.8645	0.0515055	10.6299	0.181741	10.7782	0.17695	10.9401	0.129428	10.8365	0.143743	-0.02	0.86	0.21	0.12	0.21	0.41	-0.02	0.96	0.16	0.62	0.06	0.87
AT1G11020	RING/FYVE/PHD zinc finger superfamily protein	1	chr1	3676691	3678524	11.2616	0.0659757	11.336	0.0223851	11.249	0.0354154	11.1961	0.0733154	11.3125	0.0656281	11.225	0.123699	11.2138	0.0885138	11.315	0.0417929	11.1408	0.0737349	0.07	0.37	-0.01	0.91	0.12	0.57	0.03	0.92	0.1	0.47	-0.07	0.67
AT1G11040	HSP40/DnaJ peptide-binding protein	0	chr1	3679225	3680924	5.6253	0.0802501	5.78482	0.174774	5.75577	0.225729	6.13915	0.787305	5.63101	0.0998051	5.58529	0.18336	5.61491	0.143174	5.47277	0.190741	5.65779	0.211604	0.16	0.48	0.13	0.65	-0.51	0.8	-0.55	0.72	-0.14	0.69	0.04	0.92
AT1G11050	Protein kinase superfamily protein	1	chr1	3681888	3684169	8.79755	0.0863701	8.76422	0.421139	8.9801	0.217827	8.95881	0.0672853	9.3936	0.546364	8.89325	0.21421	9.68604	0.0385954	9.70871	0.160183	9.6326	0.127784	-0.03	0.96	0.18	0.5	0.43	0.74	-0.07	0.88	0.02	0.94	-0.05	0.79
AT1G11055		0	chr1	3683919	3684095	5.23084	0.186316	5.25591	0.110713	5.16521	0.126323	5.8403	0.871658	5.30291	0.236521	5.28291	0.199081	5.47106	0.198633	5.35881	0.230673	5.4604	0.162392	0.03	0.94	-0.07	0.82	-0.54	0.82	-0.56	0.74	-0.11	0.81	-0.01	0.98
AT1G11060	WAPL (Wings apart-like protein regulation of heterochromatin) protein	1	chr1	3684568	3689847	10.3289	0.069108	10.2238	0.0840088	10.3692	0.0721062	10.3982	0.121042	10.2203	0.0722741	10.3453	0.0933798	10.2712	0.104292	10.1751	0.103679	10.167	0.132862	-0.11	0.42	0.04	0.75	-0.18	0.54	-0.05	0.86	-0.1	0.66	-0.1	0.67
AT1G11070		0	chr1	3690212	3693648	6.76754	0.222479	6.68507	0.221597	6.38581	0.0638767	6.69453	0.0988284	7.21956	0.257415	7.02598	0.218283	6.88576	0.202832	6.90477	0.161693	6.56842	0.356204	-0.08	0.85	-0.38	0.21	0.53	0.36	0.33	0.46	0.02	0.97	-0.32	0.59
AT1G11080	serine carboxypeptidase-like 31	0	chr1	3694672	3698013	9.67276	0.388438	8.85495	0.36063	9.57012	0.0477797	8.97015	0.182246	10.0104	0.453717	9.52599	0.116619	7.90933	0.171706	7.93313	0.116167	8.23142	0.190574	-0.82	0.23	-0.1	0.84	1.04	0.31	0.56	0.23	0.02	0.95	0.32	0.38
AT1G11090	alpha/beta-Hydrolases superfamily protein	1	chr1	3702608	3703779	11.0627	0.105721	11.1087	0.071598	11.1078	0.0324078	11.1596	0.0490499	11.2638	0.0915481	11.2937	0.126548	11.0399	0.0213463	11.0413	0.0446826	11.1345	0.127683	0.05	0.78	0.05	0.74	0.1	0.64	0.13	0.59	0	0.99	0.09	0.62
AT1G11100	SNF2 domain-containing protein / helicase domain-containing protein / zinc finger protein-related	0	chr1	3703672	3709302	7.41588	0.151235	7.80918	0.0728035	7.44441	0.0798442	7.35846	0.321485	6.98421	0.206401	7.07357	0.164569	7.62481	0.19941	7.12051	0.246671	7.17365	0.170127	0.39	0.13	0.03	0.91	-0.37	0.65	-0.28	0.67	-0.5	0.29	-0.45	0.26
AT1G11110	LisH and RanBPM domains containing protein	1	chr1	3710208	3712503	5.92479	0.0556651	5.73896	0.0678575	5.82386	0.0974271	5.48712	0.394389	5.38477	0.404204	5.43088	0.176919	5.59091	0.166484	5.70319	0.0580355	6.15468	0.513896	-0.19	0.15	-0.1	0.44	-0.1	0.95	-0.06	0.95	0.11	0.68	0.56	0.46
AT1G11112		0	chr1	3712999	3713735	5.33492	0.12244	5.16975	0.186885	5.14368	0.18569	5.28943	0.310189	5.3556	0.121175	5.31869	0.325677	5.26312	0.19281	5.22946	0.24792	5.22062	0.12113	-0.17	0.53	-0.19	0.46	0.07	0.94	0.03	0.98	-0.03	0.95	-0.04	0.91
AT1G11120		1	chr1	3715184	3717320	7.89859	0.0583922	7.41631	0.123238	7.91971	0.213804	7.58439	0.318512	7.81314	0.122038	7.74839	0.1058	7.2838	0.162902	7.6158	0.12151	8.00097	0.0917432	-0.48	0.07	0.02	0.95	0.23	0.79	0.16	0.79	0.33	0.28	0.72	0.07
AT1G11125		1	chr1	3718783	3719711	6.48008	0.177084	6.20972	0.117574	6.39086	0.0933664	6.37633	0.0959234	6.48114	0.0912399	6.58026	0.101052	6.4015	0.229372	6.52465	0.194051	6.51936	0.265407	-0.27	0.3	-0.09	0.72	0.1	0.74	0.2	0.44	0.12	0.79	0.12	0.83
AT1G11130	Leucine-rich repeat protein kinase family protein	1	chr1	3722857	3727450	8.73881	0.299069	8.76959	0.0241822	9.0335	0.0856433	8.99437	0.224689	9.14862	0.240729	9.45176	0.154925	9.14658	0.170918	9.28979	0.245341	9.5168	0.165424	0.03	0.95	0.29	0.42	0.15	0.86	0.46	0.38	0.14	0.75	0.37	0.3
AT1G11145	Protein of unknown function (DUF674)	0	chr1	3727532	3728166	5.43497	0.113734	5.46366	0.129791	5.36814	0.106751	5.26708	0.0540515	5.98899	1.40049	5.47218	0.262972	5.50969	0.14023	5.32329	0.189815	5.40066	0.174007	0.03	0.91	-0.07	0.73	0.72	0.84	0.21	0.68	-0.19	0.59	-0.11	0.74
AT1G11150	transposable element gene	1	chr1	3728971	3731624	5.02035	0.281193	4.96407	0.338202	5.04521	0.391681	4.88926	0.178123	4.89408	0.320621	5.05267	0.613802	4.8547	0.185017	5.04169	0.523402	4.83915	0.148623	-0.06	0.93	0.02	0.97	0	1	0.16	0.9	0.19	0.83	-0.02	0.97
AT1G11160	Transducin/WD40 repeat-like superfamily protein	1	chr1	3733139	3739842	5.83511	0.230461	5.87387	0.0831596	5.97064	0.15285	5.83025	0.432104	6.00051	0.378972	5.91709	0.218767	5.79314	0.177575	5.78707	0.139802	5.97931	0.320388	0.04	0.91	0.14	0.69	0.17	0.91	0.09	0.93	-0.01	0.99	0.19	0.73
AT1G11170	Protein of unknown function (DUF707)	1	chr1	3740765	3744675	7.51309	0.239148	7.2275	0.153155	7.38465	0.0967816	7.69885	0.115759	7.95477	0.428621	7.78086	0.144195	7.33165	0.133165	7.55349	0.206114	7.5461	0.110399	-0.29	0.4	-0.13	0.68	0.26	0.82	0.08	0.81	0.22	0.54	0.21	0.38
AT1G11175	other RNA	1	chr1	3744858	3745655	10.5352	0.207437	10.8484	0.138105	10.7003	0.107508	11.0046	0.234801	11.1082	0.0979499	11.2675	0.0488429	11.1624	0.10817	11.3236	0.0484831	11.0874	0.18074	0.31	0.3	0.17	0.54	0.1	0.88	0.26	0.55	0.16	0.35	-0.07	0.82
AT1G11180	Secretory carrier membrane protein (SCAMP) family protein	1	chr1	3745774	3748521	9.89303	0.0867939	9.69777	0.0410833	9.65169	0.0423895	10.3656	0.141943	10.4351	0.201798	10.5334	0.27017	10.6691	0.202157	10.6663	0.164563	10.4174	0.165581	-0.2	0.16	-0.24	0.13	0.07	0.92	0.17	0.77	0	1	-0.25	0.49
AT1G11185	other RNA	1	chr1	3749510	3750035	13.4623	0.266756	13.2316	0.0588488	13.6308	0.172493	12.4444	0.128685	12.7243	0.0386906	12.5568	0.250706	13.5789	0.0799071	13.4933	0.257262	13.4616	0.0636656	-0.23	0.48	0.17	0.66	0.28	0.32	0.11	0.83	-0.09	0.84	-0.12	0.42
AT1G11190	bifunctional nuclease i	0	chr1	3750066	3752780	9.79871	0.265954	9.88066	0.158711	10.2228	0.177113	10.1275	0.177301	10.584	0.193888	11.0678	0.0988143	10.5477	0.143221	10.9602	0.126725	11.2824	0.165363	0.08	0.85	0.42	0.28	0.46	0.4	0.94	0.08	0.41	0.19	0.73	0.09
AT1G11200	Protein of unknown function (DUF300)	1	chr1	3753365	3755641	10.3648	0.1078	10.3408	0.125907	10.2763	0.122597	10.4157	0.0532481	10.4489	0.176489	10.3642	0.166148	10.4253	0.103776	10.5208	0.0528192	10.4292	0.128646	-0.02	0.92	-0.09	0.65	0.03	0.95	-0.05	0.88	0.1	0.58	0	0.99
AT1G11210	Protein of unknown function (DUF761)	0	chr1	3755677	3756998	11.6632	0.369016	11.645	0.107328	10.8834	0.114089	12.3276	0.138953	11.9953	0.169779	11.9829	0.242701	11.7183	0.18394	11.2773	0.149821	11.184	0.158521	-0.02	0.98	-0.78	0.17	-0.33	0.46	-0.34	0.5	-0.44	0.24	-0.53	0.19
AT_1_-_0_3758073-3758165		0	chr1	3758073	3758165	6.30233	0.224107	5.95738	0.133438	5.85812	0.0950343	5.84283	0.195363	6.10507	0.428096	5.91925	0.150566	5.98286	0.0836344	5.78437	0.253925	5.88328	0.145674	-0.34	0.28	-0.44	0.19	0.26	0.83	0.08	0.87	-0.2	0.62	-0.1	0.69
AT1G11220	Protein of unknown function (DUF761)	0	chr1	3759862	3761165	6.92161	0.206131	6.89671	0.165394	6.85023	0.0660797	6.88848	0.103418	6.71716	0.279787	6.91809	0.154735	6.39983	0.176999	6.40206	0.259534	6.44723	0.193603	-0.02	0.95	-0.07	0.8	-0.17	0.82	0.03	0.94	0	1	0.05	0.91
AT1G11230	Protein of unknown function (DUF761)	0	chr1	3763268	3764483	5.2049	0.127692	5.26607	0.18399	5.33487	0.201423	5.38516	0.165631	5.06808	0.200698	5.18776	0.0961108	4.94495	0.133217	4.98279	0.271454	5.24428	0.171071	0.06	0.84	0.13	0.65	-0.32	0.56	-0.2	0.57	0.04	0.94	0.3	0.34
AT1G11240		0	chr1	3766754	3768294	11.7917	0.177105	11.7991	0.161523	11.8039	0.0439077	11.6807	0.152157	11.5178	0.442509	11.7495	0.154671	11.7257	0.119747	11.9099	0.185371	11.8141	0.18261	0.01	0.98	0.01	0.97	-0.16	0.89	0.07	0.87	0.18	0.57	0.09	0.79
AT1G11250	syntaxin of plants 125	1	chr1	3768724	3769706	5.41906	0.0945456	5.1967	0.186482	5.28886	0.240079	5.26521	0.0767303	5.30871	0.236722	5.39063	0.161389	5.39315	0.14101	5.36129	0.103821	5.32843	0.0963384	-0.22	0.37	-0.13	0.68	0.04	0.95	0.13	0.71	-0.03	0.91	-0.06	0.8
AT1G11260	sugar transporter 1	1	chr1	3777328	3780337	17.185	0.0340321	17.2311	0.0451223	17.1523	0.0946395	16.4433	0.0644531	16.4303	0.191878	16.3426	0.0532835	15.7564	0.188234	15.6563	0.145674	15.4047	0.13604	0.05	0.49	-0.03	0.8	-0.01	0.98	-0.1	0.51	-0.1	0.78	-0.35	0.31
AT1G11270	F-box and associated interaction domains-containing protein	0	chr1	3780429	3786990	8.15513	0.105826	8.10222	0.0893852	8.06121	0.100869	7.76388	0.365144	8.12947	0.287149	8.10835	0.184401	7.91584	0.0822505	8.21529	0.224576	8.05686	0.199672	-0.05	0.76	-0.09	0.58	0.37	0.74	0.34	0.65	0.3	0.39	0.14	0.65
AT1G11265	transposable element gene	1	chr1	3781235	3785293	5.52105	0.112866	5.57104	0.227156	5.52232	0.0599505	5.38105	0.174484	5.40586	0.295544	5.46495	0.164369	5.50415	0.081586	5.40724	0.222097	5.52444	0.224436	0.05	0.89	0	0.99	0.02	0.98	0.08	0.85	-0.1	0.79	0.02	0.96
AT1G11280	S-locus lectin protein kinase family protein	0	chr1	3787334	3790876	7.23573	0.202388	7.45954	0.0443935	7.37322	0.128485	7.01407	0.345699	6.92423	0.309219	6.90491	0.197278	6.79936	0.0465882	6.82121	0.106325	7.03399	0.147569	0.22	0.37	0.14	0.63	-0.09	0.95	-0.11	0.89	0.02	0.91	0.23	0.31
AT1G11290	Pentatricopeptide repeat (PPR) superfamily protein	0	chr1	3791454	3793883	6.49885	0.0647656	6.59264	0.103985	6.64658	0.0520287	6.51342	0.137024	6.42165	0.100404	6.59998	0.200817	6.5069	0.172972	6.51485	0.126465	6.55832	0.0609813	0.09	0.52	0.15	0.2	-0.09	0.84	0.09	0.85	0.01	0.99	0.05	0.86
AT1G11300	protein serine/threonine kinases;protein kinases;ATP binding;sugar binding;kinases;carbohydrate binding	1	chr1	3794238	3800719	5.8172	0.0894482	5.70162	0.106138	5.8252	0.108817	5.66586	0.154172	5.51694	0.0648409	5.69701	0.412744	5.47862	0.292585	5.45676	0.113822	5.41489	0.18539	-0.12	0.48	0.01	0.97	-0.15	0.69	0.03	0.98	-0.02	0.97	-0.06	0.91
AT1G11310	Seven transmembrane MLO family protein	0	chr1	3800738	3804185	10.8328	0.198841	10.3819	0.219026	10.7871	0.169383	10.1053	0.258909	10.5079	0.322322	10.5487	0.0950484	10.6507	0.143624	10.9179	0.187131	10.9516	0.16251	-0.45	0.24	-0.05	0.9	0.4	0.65	0.44	0.4	0.27	0.43	0.3	0.34
AT1G11320		1	chr1	3807128	3808875	8.90521	0.0728303	8.95852	0.0582925	8.95784	0.0749294	9.12991	0.201173	8.9906	0.168278	8.9626	0.0786958	9.39695	0.0989524	9.29227	0.153077	9.3352	0.0921791	0.05	0.64	0.05	0.68	-0.14	0.84	-0.17	0.67	-0.1	0.7	-0.06	0.76
AT1G11330	S-locus lectin protein kinase family protein	1	chr1	3810093	3813607	11.0515	0.147112	11.1819	0.186735	11.0762	0.0865315	11.6689	0.203414	11.0611	0.430446	11.3524	0.193485	11.5927	0.134126	11.3077	0.13301	11.673	0.151955	0.13	0.65	0.02	0.92	-0.61	0.54	-0.32	0.54	-0.28	0.32	0.08	0.79
AT1G11340	S-locus lectin protein kinase family protein	0	chr1	3814116	3817420	5.26215	0.0484628	5.24916	0.239919	5.33924	0.0932514	5.4111	0.234327	5.47092	0.0963709	5.18509	0.0710042	5.66509	0.676491	5.46867	0.182881	5.25588	0.102645	-0.01	0.97	0.08	0.53	0.06	0.93	-0.23	0.62	-0.2	0.86	-0.41	0.68
AT1G11350	S-domain-1 13	0	chr1	3817591	3820805	6.66328	0.149479	6.83891	0.143982	6.42516	0.184029	6.90134	0.211264	7.34849	0.445558	7.10078	0.061724	6.48151	0.212569	6.7923	0.110121	6.631	0.145566	0.18	0.48	-0.24	0.39	0.45	0.68	0.2	0.62	0.31	0.37	0.15	0.69
AT1G11360	Adenine nucleotide alpha hydrolases-like superfamily protein	0	chr1	3821443	3823088	6.3085	0.125341	6.3812	0.136973	6.43379	0.109966	6.18527	0.12981	6.14154	0.26903	6.31151	0.139331	6.08669	0.0910059	6.16191	0.0941915	6.15302	0.247805	0.07	0.76	0.13	0.52	-0.04	0.96	0.13	0.72	0.08	0.7	0.07	0.88
AT1G11362	Plant invertase/pectin methylesterase inhibitor superfamily protein	0	chr1	3824510	3825196	6.24982	0.148732	6.16386	0.0880252	5.90355	0.168579	6.41499	0.218818	6.55768	0.394015	6.57259	0.205444	6.24185	0.111502	6.50818	0.243345	6.16937	0.170579	-0.09	0.68	-0.35	0.23	0.14	0.9	0.16	0.78	0.27	0.49	-0.07	0.82
AT1G11370	Pectin lyase-like superfamily protein	0	chr1	3828098	3830945	5.31461	0.15348	5.10676	0.123192	5.40474	0.114697	5.09681	0.236049	5.30651	0.12839	4.90661	0.225641	4.99865	0.306003	5.07113	0.267339	5.01836	0.100411	-0.21	0.38	0.09	0.7	0.21	0.74	-0.19	0.76	0.07	0.92	0.02	0.97
AT1G11380	PLAC8 family protein	1	chr1	3832623	3834191	9.35258	0.182187	9.16184	0.0702294	9.21102	0.0416285	8.50737	0.243047	8.78022	0.305859	8.82173	0.145068	8.60333	0.115463	8.80592	0.20484	8.6518	0.0791064	-0.19	0.41	-0.14	0.51	0.27	0.78	0.31	0.54	0.2	0.56	0.05	0.82
AT1G11390	Protein kinase superfamily protein	0	chr1	3834459	3837629	9.23414	0.121161	9.18685	0.059065	9.17319	0.116456	9.40209	0.242318	9.30473	0.124517	9.33033	0.147884	9.44499	0.126944	9.38128	0.113193	9.41883	0.173483	-0.05	0.79	-0.06	0.77	-0.1	0.89	-0.07	0.9	-0.06	0.81	-0.03	0.95
AT1G11400	partner of Y14-MAGO	1	chr1	3837821	3840207	11.6067	0.0786696	11.6309	0.0323344	11.5881	0.0536856	11.7362	0.0869218	11.7201	0.139554	11.7538	0.107315	11.678	0.0173703	11.7444	0.0609968	11.557	0.0268294	0.02	0.83	-0.02	0.89	-0.02	0.97	0.02	0.95	0.07	0.47	-0.12	0.07
AT1G11410	S-locus lectin protein kinase family protein	1	chr1	3841286	3844432	7.004	0.0315243	6.92707	0.096858	6.91743	0.13672	7.30881	0.116989	7.17359	0.206409	7.28902	0.281517	7.30373	0.204209	7.28346	0.16322	7.29379	0.177725	-0.08	0.52	-0.09	0.6	-0.14	0.83	-0.02	0.98	-0.02	0.97	-0.01	0.98
AT1G11420	DOMAIN OF UNKNOWN FUNCTION 724 2	0	chr1	3844581	3846872	8.50428	0.175782	8.68552	0.120575	8.48109	0.110046	8.80949	0.315147	8.75625	0.123197	8.91053	0.251774	9.03263	0.215008	8.79135	0.180244	8.84464	0.104258	0.18	0.47	-0.02	0.94	-0.05	0.96	0.1	0.9	-0.24	0.56	-0.19	0.59
AT1G11430	plastid developmental protein DAG, putative	1	chr1	3847243	3849162	9.36978	0.0653895	9.38164	0.0332407	9.33123	0.0267119	9.61805	0.0801289	9.577	0.137309	9.50179	0.12113	10.5001	0.100858	10.4027	0.104867	10.2964	0.0848844	0.01	0.91	-0.04	0.65	-0.04	0.92	-0.12	0.67	-0.1	0.66	-0.2	0.3
AT1G11440		1	chr1	3849360	3850662	9.46466	0.0648851	9.5579	0.105186	9.3697	0.0881003	9.49145	0.130807	9.55317	0.0722025	9.48748	0.139473	9.02764	0.194271	8.91743	0.0370911	8.79258	0.133805	0.09	0.52	-0.09	0.45	0.06	0.87	0	0.99	-0.11	0.71	-0.24	0.48
AT1G11450	nodulin MtN21 /EamA-like transporter family protein	1	chr1	3853243	3855385	9.19617	0.214986	9.03751	0.124627	9.43025	0.126799	10.3549	0.214022	9.99588	0.311017	10.4983	0.221915	10.5746	0.180793	10.3787	0.0577134	10.383	0.105051	-0.16	0.59	0.23	0.42	-0.36	0.67	0.14	0.8	-0.2	0.47	-0.19	0.52
AT1G11460	nodulin MtN21 /EamA-like transporter family protein	1	chr1	3857005	3859268	8.82729	0.22432	8.8126	0.161726	9.01706	0.0743014	10.1637	0.38183	9.84915	0.149444	10.3887	0.263862	10.3644	0.22347	10.1423	0.223139	10.3166	0.105426	-0.01	0.97	0.19	0.49	-0.31	0.75	0.22	0.79	-0.22	0.64	-0.05	0.91
AT1G11470	Pentatricopeptide repeat (PPR) superfamily protein	0	chr1	3859662	3860604	6.31253	0.153409	6.19	0.1082	6.49081	0.140835	6.16625	0.197512	6.13756	0.214294	5.93261	0.51384	6.1779	0.367562	6.08018	0.1148	6.11582	0.0991425	-0.12	0.58	0.18	0.46	-0.03	0.97	-0.23	0.82	-0.1	0.87	-0.06	0.92
AT_1_+_0_3861718-3861810		1	chr1	3861718	3861810	5.33422	0.165088	5.54629	0.203988	5.55988	0.159428	5.52341	0.140493	5.42585	0.154556	5.42275	0.155187	5.27803	0.333773	5.23642	0.11826	5.49155	0.128622	0.21	0.5	0.23	0.4	-0.1	0.86	-0.1	0.8	-0.04	0.95	0.21	0.68
AT1G11475	RNA polymerases N / 8 kDa subunit	1	chr1	3862399	3864030	10.7134	0.0836734	10.5875	0.101013	10.4838	0.0765735	10.7351	0.0403439	10.613	0.18147	10.6343	0.114086	10.9035	0.164456	10.8532	0.148277	10.8976	0.0717912	-0.13	0.42	-0.23	0.17	-0.12	0.79	-0.1	0.65	-0.05	0.89	-0.01	0.99
AT1G11480	eukaryotic translation initiation factor-related	0	chr1	3864153	3866969	9.49112	0.0245775	9.59378	0.0627788	9.55525	0.0951192	9.06188	0.273827	9.1974	0.278213	9.16619	0.170478	8.98819	0.193257	9.02017	0.255952	9.026	0.0598611	0.1	0.24	0.06	0.58	0.14	0.89	0.1	0.87	0.03	0.96	0.04	0.91
AT1G11482		0	chr1	3867405	3868870	5.8298	0.103678	5.72898	0.195147	5.76357	0.0897531	5.5864	0.203807	5.80821	0.36881	5.73195	0.163459	6.32488	0.259935	6.49662	0.159584	6.25865	0.13685	-0.1	0.71	-0.07	0.69	0.22	0.84	0.15	0.77	0.17	0.71	-0.07	0.89
AT1G11490	zinc finger (C2H2 type) family protein	0	chr1	3868884	3870065	6.17089	0.111953	6.21317	0.108164	6.0453	0.131605	6.04054	0.268372	6.06392	0.190418	6.07552	0.164857	5.70074	0.133114	6.06201	0.186352	5.8532	0.16328	0.04	0.84	-0.13	0.53	0.02	0.98	0.03	0.96	0.36	0.3	0.15	0.62
AT1G11500	Protein of unknown function (DUF1218)	1	chr1	3870833	3871570	7.62702	0.205724	7.71271	0.0834651	7.51397	0.114547	7.93429	0.182509	8.01118	0.136265	7.70311	0.25751	7.88637	0.20206	7.9703	0.133415	7.87783	0.229941	0.09	0.76	-0.11	0.69	0.08	0.9	-0.23	0.69	0.08	0.82	-0.01	0.99
AT1G11510	DNA-binding storekeeper protein-related transcriptional regulator	0	chr1	3871778	3872836	4.66008	0.240215	4.9339	0.228172	5.1084	0.126405	5.00839	0.321645	4.86916	0.116343	4.98314	0.0877636	4.95942	0.112089	5.00977	0.205431	4.93045	0.235007	0.27	0.49	0.45	0.21	-0.14	0.88	-0.03	0.97	0.05	0.9	-0.03	0.95
AT1G11520	pliceosome associated protein-related	1	chr1	3873029	3873619	9.5864	0.160276	9.78234	0.174575	9.65385	0.199633	9.5596	0.160504	9.52187	0.283455	9.57229	0.24775	9.50147	0.333542	9.46939	0.227639	9.51623	0.108828	0.2	0.49	0.07	0.84	-0.04	0.97	0.01	0.99	-0.03	0.96	0.01	0.98
AT1G11530	C-terminal cysteine residue is changed to a serine 1	1	chr1	3874437	3875484	12.3912	0.300755	12.032	0.074367	11.4763	0.180593	12.7226	0.203959	12.4459	0.231248	12.4514	0.199178	12.6209	0.145593	12.2894	0.147252	12.1413	0.14651	-0.36	0.34	-0.91	0.12	-0.28	0.69	-0.27	0.61	-0.33	0.29	-0.48	0.17
AT1G11540	Sulfite exporter TauE/SafE family protein	0	chr1	3875442	3877155	11.6301	0.19138	11.3763	0.225482	11.3411	0.133039	11.2524	0.220964	11.0849	0.100606	11.0931	0.103399	11.3693	0.0809286	11.0071	0.167801	11.0339	0.0399359	-0.25	0.47	-0.29	0.31	-0.17	0.78	-0.16	0.73	-0.36	0.23	-0.34	0.07
AT1G11545	xyloglucan endotransglucosylase/hydrolase 8	0	chr1	3878550	3880361	10.0144	0.396747	9.99589	0.224895	9.84821	0.0832268	10.3188	0.326455	10.1446	0.101346	10.365	0.229773	9.02655	0.0985321	9.2429	0.297777	9.51954	0.0379226	-0.02	0.98	-0.17	0.74	-0.17	0.84	0.05	0.96	0.22	0.65	0.49	0.04
AT1G11550	pre-tRNA	1	chr1	3881529	3881608	10.0373	0.171575	10.2734	0.125154	10.1754	0.119612	10.1653	0.227656	9.95279	0.192896	9.77104	0.0602763	10.2376	0.285601	9.97911	0.162911	10.0001	0.299172	0.24	0.35	0.14	0.57	-0.21	0.77	-0.39	0.38	-0.26	0.6	-0.24	0.7
AT1G11560	Oligosaccharyltransferase complex/magnesium transporter family protein	1	chr1	3881788	3882819	8.02859	0.198383	8.18189	0.373473	8.27838	0.369205	7.77994	0.357224	7.68319	0.245155	7.7832	0.21235	7.53426	0.381334	7.42016	0.493974	7.57615	0.321532	0.15	0.78	0.25	0.61	-0.1	0.94	0	1	-0.11	0.91	0.04	0.96
AT1G11570	NTF2-like	1	chr1	3883280	3883956	7.7305	0.0489822	7.7072	0.0711954	7.58091	0.0942496	7.8076	0.194339	7.824	0.287527	7.76829	0.265159	7.75941	0.225287	7.69702	0.144116	7.71834	0.071382	-0.02	0.84	-0.15	0.26	0.02	0.99	-0.04	0.96	-0.06	0.89	-0.04	0.92
AT1G11572	Plant thionin family protein	1	chr1	3884356	3884952	5.9355	0.0978576	5.77491	0.129362	5.55711	0.185125	5.65619	0.385824	5.82125	0.23784	5.73126	0.204233	5.75533	0.266352	5.64203	0.130308	5.69564	0.2313	-0.16	0.41	-0.38	0.19	0.17	0.89	0.08	0.94	-0.11	0.8	-0.06	0.92
AT1G11580	methylesterase PCR A	1	chr1	3888690	3890811	15.2575	0.338872	15.5904	0.205401	15.4743	0.0440969	15.4525	0.18321	15.4463	0.199377	15.6823	0.0139577	14.8507	0.0893636	15.1195	0.146171	15.1226	0.223656	0.33	0.48	0.22	0.59	-0.01	0.99	0.23	0.5	0.27	0.3	0.27	0.42
AT1G11590	Plant invertase/pectin methylesterase inhibitor superfamily	1	chr1	3892580	3894677	5.24076	0.134748	5.17939	0.224218	5.14606	0.320075	5.28881	0.115604	5.18539	0.302216	5.25605	0.111436	5.33	0.193903	5.09128	0.114223	5.15515	0.142361	-0.06	0.87	-0.09	0.84	-0.1	0.9	-0.03	0.92	-0.24	0.46	-0.17	0.62
AT1G11592	other RNA	0	chr1	3895179	3896934	9.42479	0.089169	9.01094	0.0515178	9.37073	0.0948922	8.7857	0.368587	9.10863	0.263589	9.07416	0.0779151	8.89324	0.0785273	8.96044	0.191244	8.98645	0.216586	-0.41	0.06	-0.05	0.74	0.32	0.77	0.29	0.68	0.07	0.83	0.09	0.79
AT1G11593	Plant invertase/pectin methylesterase inhibitor superfamily protein	1	chr1	3898002	3898609	5.49111	0.179689	5.28553	0.196515	5.42164	0.123998	5.35041	0.175226	5.2991	0.0827974	5.19956	0.285337	5.55566	0.502571	5.08883	0.145731	5.30001	0.195537	-0.21	0.51	-0.07	0.81	-0.05	0.92	-0.15	0.81	-0.47	0.54	-0.26	0.75
AT1G11595		1	chr1	3898631	3899699	6.85735	0.0232885	6.63339	0.208075	6.6254	0.0627725	6.4336	0.0960312	6.56906	0.208355	6.58912	0.158855	6.43822	0.297552	6.45731	0.13458	6.61208	0.184196	-0.22	0.37	-0.23	0.08	0.14	0.82	0.16	0.65	0.02	0.97	0.17	0.74
AT1G11600	cytochrome P450, family 77, subfamily B, polypeptide 1	1	chr1	3902012	3903782	6.49137	0.312104	6.89737	0.225604	6.93438	0.254556	7.72789	1.25064	7.04752	0.174494	7.58032	0.198102	7.01098	0.348047	7.52614	0.415933	7.50031	0.321126	0.41	0.38	0.44	0.35	-0.68	0.84	-0.15	0.96	0.52	0.52	0.49	0.46
AT1G11608	F-box associated ubiquitination effector family protein	1	chr1	3905579	3906818	5.35499	0.243776	5.32832	0.151765	5.18369	0.0727548	5.12185	0.137988	5.1664	0.195016	5.10473	0.086222	5.17763	0.162747	5.3725	0.343412	5.35768	0.369963	-0.03	0.95	-0.17	0.56	0.04	0.95	-0.02	0.96	0.19	0.74	0.18	0.77
AT1G11610	cytochrome P450, family 71, subfamily A, polypeptide 18	0	chr1	3906862	3909338	5.38035	0.236371	5.57746	0.0922527	5.56689	0.184022	5.58335	0.064685	5.62075	0.0645502	5.66751	0.305255	5.74838	0.147248	5.55183	0.373459	5.69181	0.240608	0.2	0.51	0.19	0.59	0.04	0.87	0.08	0.89	-0.2	0.75	-0.06	0.9
AT1G11620	F-box and associated interaction domains-containing protein	1	chr1	3910833	3911924	5.05693	0.267861	4.8496	0.182817	5.02117	0.362869	5.04153	0.44674	5.02152	0.386078	4.8276	0.375986	5.06899	0.463563	4.92277	0.293448	5.09496	0.164111	-0.21	0.59	-0.04	0.96	-0.02	0.99	-0.21	0.84	-0.15	0.87	0.03	0.98
AT1G11630	Tetratricopeptide repeat (TPR)-like superfamily protein	0	chr1	3912902	3914407	8.9024	0.165805	8.9845	0.102539	8.95126	0.0546825	9.11401	0.0800206	8.92263	0.126351	8.99668	0.0513091	9.2634	0.114099	9.15289	0.0605116	9.0959	0.0556871	0.08	0.74	0.05	0.83	-0.19	0.53	-0.12	0.5	-0.11	0.56	-0.17	0.36
AT1G11650	RNA-binding (RRM/RBD/RNP motifs) family protein	1	chr1	3914774	3918176	12.6684	0.111645	12.5926	0.121717	12.7083	0.0725024	12.6955	0.098058	12.6808	0.175106	12.7341	0.134532	12.7583	0.0986764	12.7057	0.087054	12.7583	0.151718	-0.08	0.71	0.04	0.82	-0.01	0.98	0.04	0.91	-0.05	0.79	0	1
AT1G11655		1	chr1	3919272	3919774	8.37454	0.571835	8.28245	0.224644	8.3868	0.226395	8.57025	0.162503	8.02293	0.289031	8.1021	0.25402	7.70116	0.160148	7.76073	0.147028	7.7802	0.0790317	-0.09	0.92	0.01	0.99	-0.55	0.43	-0.47	0.42	0.06	0.86	0.08	0.77
AT1G11660	heat shock protein 70 (Hsp 70) family protein	1	chr1	3920543	3924555	10.3815	0.0615158	10.3304	0.049842	10.3813	0.0596389	10.3434	0.124403	10.2847	0.182481	10.4542	0.0976494	10.3309	0.168877	10.3329	0.0482227	10.3477	0.152565	-0.05	0.59	0	1	-0.06	0.92	0.11	0.71	0	1	0.02	0.97
AT1G11670	MATE efflux family protein	0	chr1	3928162	3931576	11.8492	0.240484	12.1462	0.145162	11.7767	0.0984425	12.3813	0.0862992	11.9284	0.159111	12.0541	0.0938355	12.1467	0.231908	11.9165	0.154331	11.8583	0.162179	0.3	0.38	-0.07	0.83	-0.45	0.26	-0.33	0.23	-0.23	0.57	-0.29	0.47
AT1G11680	CYTOCHROME P450 51G1	1	chr1	3938501	3940754	14.6082	0.206478	14.6608	0.160901	14.7164	0.137247	14.4503	0.175143	14.4863	0.123033	14.5321	0.150226	14.1719	0.04257	14.323	0.089313	14.4245	0.156221	0.05	0.89	0.11	0.72	0.04	0.95	0.08	0.85	0.15	0.31	0.25	0.3
AT1G11684		0	chr1	3941103	3941300	5.55523	0.125498	5.42782	0.110052	5.459	0.0438386	5.4769	0.16053	5.42923	0.195074	5.46295	0.148503	5.47861	0.0220757	5.47641	0.219067	5.40754	0.237508	-0.13	0.52	-0.1	0.53	-0.05	0.95	-0.01	0.98	0	1	-0.07	0.85
AT1G11690		1	chr1	3941469	3942212	4.83765	0.118704	4.73085	0.271616	4.90861	0.0927727	4.81059	0.219459	4.78555	0.186417	4.44962	0.203392	4.94456	0.215442	4.52179	0.325124	4.63236	0.0892359	-0.11	0.78	0.07	0.7	-0.03	0.98	-0.36	0.51	-0.42	0.45	-0.31	0.35
AT1G11700	Protein of unknown function, DUF584	1	chr1	3945737	3946613	10.0299	0.408343	10.144	0.128269	10.0971	0.240951	10.9294	0.475681	10.518	0.514307	10.3762	0.195932	11.1191	0.148088	10.7024	0.152253	10.8921	0.231874	0.11	0.84	0.07	0.92	-0.41	0.82	-0.55	0.56	-0.42	0.23	-0.23	0.57
AT1G11710	Pentatricopeptide repeat (PPR) superfamily protein	1	chr1	3948714	3951359	5.8871	0.198975	5.89112	0.162111	5.90985	0.144938	6.12891	0.27152	5.91765	0.193823	6.07413	0.239694	6.11207	0.0993303	5.95898	0.176351	6.09996	0.0976703	0	0.99	0.02	0.95	-0.21	0.8	-0.05	0.94	-0.15	0.61	-0.01	0.96
AT1G11720	starch synthase 3	1	chr1	3951553	3957044	8.65814	0.14863	8.68042	0.0509729	8.83238	0.125626	8.50996	0.487726	8.61684	0.248081	8.7843	0.082966	8.34049	0.218205	8.48105	0.218788	8.37449	0.275366	0.02	0.92	0.17	0.44	0.11	0.95	0.27	0.77	0.14	0.76	0.03	0.96
AT1G11730	Galactosyltransferase family protein	1	chr1	3957473	3960113	6.38295	0.210183	6.34899	0.201601	6.18216	0.20282	6.38835	0.0867345	6.12919	0.208327	6.46896	0.0987168	6.46822	0.208292	6.31119	0.193072	6.1932	0.144403	-0.03	0.94	-0.2	0.55	-0.26	0.58	0.08	0.75	-0.16	0.72	-0.28	0.44
AT1G11735	MIR171B; miRNA	0	chr1	3961348	3961464	5.3137	0.137374	5.2883	0.148154	5.24007	0.31387	5.5196	0.204154	5.58378	0.114845	5.61372	0.354128	5.41257	0.152912	5.63242	0.171805	5.78849	0.289063	-0.03	0.93	-0.07	0.88	0.06	0.92	0.09	0.91	0.22	0.51	0.38	0.42
AT1G11740	ankyrin repeat family protein	0	chr1	3963054	3966824	7.99007	0.301982	7.88388	0.179399	7.67262	0.141718	8.3178	0.158544	8.55713	0.320285	8.53395	0.210248	8.17171	0.133969	8.23478	0.173941	8.15566	0.416366	-0.11	0.82	-0.32	0.41	0.24	0.79	0.22	0.66	0.06	0.85	-0.02	0.98
AT1G11750	CLP protease proteolytic subunit 6	1	chr1	3967476	3969877	6.30301	0.0745509	6.38	0.144225	6.24673	0.0918224	6.05657	0.316071	6.29623	0.521991	6.22758	0.0568281	6.0635	0.137474	6.07968	0.173845	6.25543	0.107564	0.08	0.7	-0.06	0.7	0.24	0.88	0.17	0.78	0.02	0.97	0.19	0.44
AT1G11755	Undecaprenyl pyrophosphate synthetase family protein	0	chr1	3969681	3971840	9.26586	0.0551888	9.21522	0.0665763	9.3173	0.0312708	9.40537	0.119792	9.37119	0.122543	9.39568	0.10897	9.47296	0.100589	9.53433	0.0961934	9.53085	0.0683195	-0.05	0.63	0.05	0.48	-0.03	0.94	-0.01	0.98	0.06	0.77	0.06	0.75
AT1G11760		0	chr1	3972032	3973286	10.0047	0.0652543	10.0944	0.0669911	10.0271	0.12574	10.0704	0.162292	10.0849	0.206211	10.1556	0.233821	10.2613	0.106257	10.1809	0.139858	10.0678	0.130788	0.09	0.42	0.02	0.91	0.01	0.99	0.09	0.88	-0.08	0.76	-0.19	0.42
AT1G11765	Plant self-incompatibility protein S1 family	1	chr1	3973875	3974509	5.15937	0.0806879	5.19254	0.161938	5.18048	0.178916	5.63667	0.395696	5.58935	0.755457	5.44334	0.219382	5.49311	0.251045	5.23419	0.30752	5.26132	0.363651	0.03	0.9	0.02	0.94	-0.05	0.99	-0.19	0.82	-0.26	0.67	-0.23	0.72
AT1G11770	FAD-binding Berberine family protein	1	chr1	3975679	3977379	5.11894	0.172986	4.87433	0.0884006	5.02598	0.322685	4.9814	0.227926	4.87893	0.154223	4.83982	0.336155	4.98465	0.254051	4.99875	0.14269	4.73785	0.0977181	-0.24	0.3	-0.09	0.85	-0.1	0.89	-0.14	0.85	0.01	0.98	-0.25	0.52
AT1G11780	oxidoreductase, 2OG-Fe(II) oxygenase family protein	0	chr1	3976839	3979195	5.78994	0.138063	5.5629	0.0799897	5.42059	0.243526	5.51861	0.11879	5.48026	0.118683	5.50191	0.0245599	5.63675	0.234249	5.59312	0.147271	5.42552	0.187215	-0.23	0.26	-0.37	0.28	-0.04	0.93	-0.02	0.95	-0.04	0.93	-0.21	0.63
AT1G11785		0	chr1	3979862	3980956	4.84247	0.390545	4.80701	0.165237	4.77937	0.201516	5.01656	0.098713	4.90241	0.0751774	5.07765	0.192529	5.02542	0.12551	4.94384	0.0668223	5.34021	0.197897	-0.04	0.96	-0.06	0.92	-0.11	0.68	0.06	0.88	-0.08	0.71	0.31	0.35
AT1G11790	arogenate dehydratase 1	1	chr1	3981248	3985215	9.60032	0.118862	9.69018	0.107528	9.69654	0.0730561	9.65395	0.159126	9.67033	0.183763	9.68463	0.172197	9.75252	0.123214	10.0021	0.0907845	10.0183	0.0627543	0.09	0.64	0.1	0.55	0.02	0.98	0.03	0.95	0.25	0.29	0.27	0.23
AT1G11800	endonuclease/exonuclease/phosphatase family protein	0	chr1	3985225	3987290	7.72635	0.12575	7.73331	0.037896	7.57086	0.0612463	8.15972	0.03701	8.00033	0.261661	8.10651	0.0632264	8.15681	0.128785	8.16194	0.186329	8.07141	0.050641	0.01	0.97	-0.16	0.35	-0.16	0.81	-0.05	0.7	0.01	0.99	-0.09	0.67
AT1G11803		0	chr1	3987755	3988030	5.82613	0.206568	5.78586	0.213674	5.98736	0.203184	5.79494	0.278026	5.73237	0.265144	5.66689	0.246068	5.61113	0.253314	5.75233	0.0825398	5.9442	0.0693052	-0.04	0.93	0.16	0.64	-0.06	0.96	-0.13	0.86	0.14	0.73	0.33	0.38
AT1G11806		1	chr1	3988346	3989398	5.53464	0.111942	5.41651	0.119432	5.36091	0.134148	5.25194	0.0593201	5.37599	0.134865	5.51802	0.195163	5.64331	0.247737	5.64045	0.489648	5.5489	0.113082	-0.12	0.54	-0.17	0.4	0.12	0.71	0.27	0.48	0	1	-0.09	0.82
AT1G11810	F-box associated ubiquitination effector family protein	1	chr1	3989763	3991066	6.07592	0.0723368	6.28965	0.0821594	6.15102	0.176572	5.80927	0.250781	5.55677	0.122761	5.62978	0.301235	5.77671	0.20045	5.89778	0.211394	5.85081	0.217939	0.21	0.17	0.08	0.75	-0.25	0.69	-0.18	0.8	0.12	0.79	0.07	0.88
AT1G11820	O-Glycosyl hydrolases family 17 protein	0	chr1	3991027	3993598	10.3158	0.117029	10.309	0.121755	10.2818	0.0546642	10.1721	0.22114	10.0734	0.212746	10.0673	0.167768	10.0914	0.185952	9.82033	0.14778	9.92583	0.114367	-0.01	0.98	-0.03	0.84	-0.1	0.9	-0.1	0.84	-0.27	0.43	-0.17	0.6
AT1G11840	glyoxalase I homolog	1	chr1	3995169	3997907	10.6764	0.311208	10.9639	0.152717	11.0141	0.0286451	10.5561	0.0818088	10.3454	0.117532	10.6584	0.245657	10.0039	0.182481	10.15	0.217366	10.2112	0.0426078	0.29	0.48	0.34	0.36	-0.21	0.47	0.1	0.83	0.15	0.74	0.21	0.43
AT1G11850		1	chr1	3999199	3999876	4.70849	0.166178	4.58953	0.181457	4.68919	0.145143	4.61467	0.175385	4.32992	0.0969589	4.55172	0.217853	4.72951	0.140368	4.60147	0.0574107	4.46298	0.17814	-0.12	0.69	-0.02	0.95	-0.28	0.49	-0.06	0.91	-0.13	0.57	-0.27	0.41
AT_1_+_2_4000614-4000721		1	chr1	4000615	4000722	5.818	0.158244	6.03803	0.155703	6.06831	0.263616	5.97734	0.193884	6.05421	0.162042	6.26376	0.426062	6.16876	0.280374	6.19337	0.119713	6.10972	0.185293	0.22	0.4	0.25	0.48	0.08	0.91	0.29	0.75	0.02	0.96	-0.06	0.92
AT1G11860	Glycine cleavage T-protein family	1	chr1	4001113	4003442	12.8507	0.0618211	12.8798	0.0875139	12.9249	0.126572	12.5609	0.131985	12.7736	0.0744893	12.7559	0.0843782	12.3153	0.168171	12.5077	0.089558	12.513	0.0376928	0.03	0.84	0.07	0.66	0.21	0.49	0.2	0.5	0.19	0.48	0.2	0.42
AT1G11870	Seryl-tRNA synthetase	1	chr1	4003846	4006739	9.74527	0.031507	9.55453	0.0732334	9.74261	0.0320533	9.73697	0.12821	9.70146	0.133522	9.87042	0.0556996	9.64873	0.0463593	9.75635	0.115351	9.70642	0.0773995	-0.19	0.12	0	0.97	-0.04	0.95	0.13	0.6	0.11	0.55	0.06	0.66
AT1G11880	transferases, transferring hexosyl groups	0	chr1	4007705	4010433	8.21322	0.203809	8.2733	0.0703356	8.17901	0.0988661	8.29119	0.123152	8.26115	0.197283	8.36661	0.0693717	8.37166	0.227211	8.32275	0.12655	8.36812	0.156825	0.06	0.84	-0.03	0.92	-0.03	0.97	0.08	0.78	-0.05	0.91	0	0.99
AT1G11890	Synaptobrevin family protein	1	chr1	4010779	4013125	11.0424	0.140991	10.821	0.0602632	10.9527	0.0631414	11.0169	0.129381	11.1867	0.135852	11.1087	0.115863	10.9305	0.254194	11.2663	0.236063	11.1582	0.117893	-0.22	0.25	-0.09	0.62	0.17	0.69	0.09	0.78	0.34	0.51	0.23	0.57
AT1G11900	Tetratricopeptide repeat (TPR)-like superfamily protein	0	chr1	4013121	4014681	8.46447	0.107797	8.56811	0.113839	8.41342	0.0946339	8.66431	0.125516	8.55951	0.0851414	8.69606	0.156568	8.82011	0.111167	8.8918	0.146013	8.74919	0.028102	0.1	0.58	-0.05	0.78	-0.1	0.78	0.03	0.94	0.07	0.8	-0.07	0.67
AT1G11905	B-cell receptor-associated protein 31-like	1	chr1	4014847	4016540	10.8732	0.0490785	10.8498	0.0359301	10.8641	0.0678945	10.7677	0.15117	10.9313	0.144468	10.8997	0.0590261	10.6929	0.0545302	10.6522	0.133057	10.7145	0.104273	-0.02	0.76	-0.01	0.94	0.16	0.74	0.13	0.66	-0.04	0.86	0.02	0.91
AT1G11910	aspartic proteinase A1	0	chr1	4016784	4020983	10.6608	0.0609566	10.8111	0.17984	10.8204	0.077243	10.6689	0.235291	10.8636	0.120784	10.9381	0.121259	11.1103	0.121233	11.097	0.169587	11.0501	0.130039	0.15	0.5	0.16	0.22	0.19	0.76	0.27	0.58	-0.01	0.97	-0.06	0.83
AT1G11915		1	chr1	4021825	4023292	6.3215	0.0890072	6.40859	0.100518	6.25065	0.0550445	6.24438	0.212925	6.26081	0.134747	6.46875	0.154118	6.47141	0.199631	6.34062	0.214019	6.35211	0.0885041	0.09	0.59	-0.07	0.56	0.02	0.98	0.22	0.64	-0.13	0.77	-0.12	0.71
AT1G11920	Pectin lyase-like superfamily protein	0	chr1	4023667	4025097	6.08923	0.189951	5.82579	0.288993	5.92384	0.18794	6.20112	0.595846	5.97366	0.186851	6.19753	0.0677152	6.17616	0.230223	5.9009	0.216046	6.23597	0.102853	-0.26	0.52	-0.17	0.6	-0.23	0.89	0	1	-0.28	0.55	0.06	0.88
AT1G11925	Stigma-specific Stig1 family protein	0	chr1	4025930	4026732	6.93883	0.733826	7.63226	0.684779	6.82088	0.905047	8.75265	0.951159	7.77806	1.30796	8.59491	0.533846	8.2568	0.539136	7.80316	1.2249	9.23966	0.52301	0.69	0.56	-0.12	0.95	-0.97	0.81	-0.16	0.95	-0.45	0.83	0.98	0.36
AT1G11930	Predicted pyridoxal phosphate-dependent enzyme, YBL036C type	1	chr1	4028692	4030584	11.4574	0.161722	11.5102	0.164914	11.4336	0.0617856	11.6332	0.166095	11.6996	0.121626	11.702	0.137313	11.7608	0.0748007	11.7298	0.0894161	11.8106	0.259246	0.05	0.87	-0.02	0.92	0.07	0.9	0.07	0.87	-0.03	0.87	0.05	0.91
AT1G11940	Core-2/I-branching beta-1,6-N-acetylglucosaminyltransferase family protein	0	chr1	4031574	4034078	8.0374	0.0559938	7.85728	0.126964	8.16935	0.091292	8.02047	0.0663861	8.24462	0.459117	8.09387	0.101604	7.98169	0.156883	8.63667	0.790744	8.34538	0.242449	-0.18	0.29	0.13	0.31	0.22	0.85	0.07	0.75	0.65	0.58	0.36	0.38
AT1G11950	Transcription factor jumonji (jmjC) domain-containing protein	0	chr1	4034587	4038758	7.47907	0.0624746	7.66206	0.104775	7.5212	0.147999	7.47323	0.142029	7.44832	0.210941	7.51521	0.116977	7.92974	0.11752	7.77752	0.138733	7.72558	0.0935871	0.18	0.24	0.04	0.84	-0.02	0.97	0.04	0.91	-0.15	0.57	-0.2	0.35
AT1G11960	ERD (early-responsive to dehydration stress) family protein	0	chr1	4039711	4043880	8.3627	0.191472	8.64755	0.0574381	8.54889	0.0332369	8.59741	0.0939507	8.64353	0.0706268	8.66411	0.187014	8.40674	0.229202	8.29215	0.0846575	8.52612	0.133045	0.28	0.26	0.19	0.41	0.05	0.88	0.07	0.87	-0.11	0.76	0.12	0.76
AT1G11970	Ubiquitin-like superfamily protein	1	chr1	4044370	4044669	4.67751	0.196912	4.6056	0.297239	4.96177	0.0611717	5.06381	0.075859	4.867	0.205496	4.93055	0.309015	4.75607	0.180201	4.86686	0.211643	4.90079	0.292074	-0.07	0.89	0.28	0.27	-0.2	0.69	-0.13	0.82	0.11	0.79	0.14	0.78
AT1G11980	ubiquitin-related protein 3	1	chr1	4045619	4045855	10.4919	0.0698405	10.6051	0.0646202	10.4034	0.154593	10.4811	0.106424	10.223	0.0480852	10.4253	0.158776	10.5549	0.124149	10.3658	0.141607	10.4783	0.0336982	0.11	0.33	-0.09	0.66	-0.26	0.3	-0.06	0.88	-0.19	0.49	-0.08	0.68
AT1G11990	O-fucosyltransferase family protein	0	chr1	4046246	4049060	5.22979	0.295738	5.34117	0.0981059	5.36994	0.107422	5.53587	0.306216	5.44121	0.155373	5.59833	0.201901	5.38567	0.120484	5.32367	0.0728053	5.36163	0.142822	0.11	0.78	0.14	0.72	-0.09	0.92	0.06	0.94	-0.06	0.77	-0.02	0.94
AT1G12000	Phosphofructokinase family protein	0	chr1	4049896	4053835	6.49438	0.190955	6.5249	0.206511	6.41422	0.0643991	6.39306	0.188218	6.4745	0.19657	6.71747	0.202991	6.59356	0.206353	6.66389	0.14132	6.8589	0.224705	0.03	0.94	-0.08	0.75	0.08	0.91	0.32	0.52	0.07	0.86	0.27	0.54
AT1G12010	2-oxoglutarate (2OG) and Fe(II)-dependent oxygenase superfamily protein	1	chr1	4056207	4057933	13.0059	0.294403	12.8673	0.231827	12.7705	0.0472347	13.4776	0.248748	13.7007	0.105545	13.609	0.0691536	14.3403	0.129079	14.264	0.107046	13.9854	0.169653	-0.14	0.77	-0.24	0.5	0.22	0.72	0.13	0.78	-0.08	0.76	-0.35	0.28
AT1G12013	SNOR111; snoRNA	1	chr1	4058287	4058416	9.8871	0.223155	10.209	0.0589352	9.71817	0.162589	10.1312	0.537882	9.97762	0.135894	9.91417	0.0706903	10.0858	0.252932	10.2573	0.370969	10.1587	0.106485	0.32	0.26	-0.17	0.6	-0.15	0.92	-0.22	0.83	0.17	0.8	0.07	0.87
AT1G12015	snoRNA	1	chr1	4058487	4058576	11.7298	0.123962	11.7516	0.0664811	11.7149	0.0732458	11.0596	0.70995	11.3537	0.422762	11.1922	0.503965	11.1139	0.609063	11.4539	0.688949	11.4173	0.431673	0.02	0.92	-0.01	0.95	0.29	0.89	0.13	0.94	0.34	0.81	0.3	0.79
Group369		0	chr1	4061398	4062115	9.10643	0.123663	8.95648	0.188067	8.62951	0.146281	9.58443	0.169291	8.81481	0.219984	8.84642	0.0978309	9.62621	0.079516	9.15227	0.162717	9.03484	0.23473	-0.15	0.57	-0.48	0.13	-0.77	0.22	-0.74	0.12	-0.47	0.15	-0.59	0.16
AT_1_-_2_4061698-4061799		0	chr1	4061700	4061801	9.24442	0.143014	9.16809	0.112988	9.16654	0.065793	9.51732	0.185022	8.92089	0.113877	8.96109	0.0626123	9.4718	0.162336	9.09703	0.0562059	9.15257	0.0805617	-0.08	0.74	-0.08	0.68	-0.6	0.23	-0.56	0.2	-0.37	0.19	-0.32	0.26
AT1G12020		0	chr1	4062462	4063337	7.55834	0.0983445	7.6256	0.0392206	7.51198	0.151336	8.58768	0.0925997	8.3916	0.174401	8.47006	0.0646522	9.79916	0.105971	9.73056	0.0716186	9.61242	0.0678331	0.07	0.59	-0.05	0.85	-0.2	0.64	-0.12	0.57	-0.07	0.72	-0.19	0.32
AT1G12030	Protein of unknown function (DUF506)	0	chr1	4064667	4066341	6.04187	0.208444	5.9341	0.214018	5.68972	0.0960827	6.36467	0.154256	6.09201	0.118243	6.16083	0.231374	6.12916	0.310774	5.82535	0.214398	5.70252	0.0391507	-0.11	0.78	-0.35	0.24	-0.27	0.49	-0.2	0.69	-0.3	0.59	-0.43	0.35
AT_1_-_0_4068756-4069007		0	chr1	4068758	4069009	5.28715	0.241749	5.08294	0.084968	4.83085	0.289743	5.10309	0.183711	4.86386	0.162822	5.14413	0.280858	4.87476	0.287099	5.01304	0.200132	5.1248	0.240328	-0.2	0.5	-0.46	0.32	-0.24	0.65	0.04	0.96	0.14	0.8	0.25	0.65
AT1G12040	leucine-rich repeat/extensin 1	1	chr1	4070124	4072567	9.88543	0.440765	9.79907	0.16844	10.1975	0.198432	9.80182	0.358808	9.74733	0.229618	10.0417	0.118723	9.61991	0.0914921	9.64755	0.1342	9.87722	0.338093	-0.09	0.9	0.31	0.58	-0.05	0.97	0.24	0.74	0.03	0.92	0.26	0.61
AT1G12050	fumarylacetoacetase, putative	1	chr1	4072752	4076207	7.05319	0.113127	6.95873	0.0667192	7.11498	0.0956089	7.45071	0.0913574	7.7298	0.1401	7.54714	0.125477	7.22404	0.150299	7.45182	0.129411	7.4138	0.172178	-0.09	0.54	0.06	0.74	0.28	0.42	0.1	0.74	0.23	0.43	0.19	0.56
AT1G12060	BCL-2-associated athanogene 5	1	chr1	4076334	4076981	7.3966	0.202535	7.70149	0.0858789	7.43861	0.105271	7.42612	0.13622	7.37714	0.190447	7.25303	0.216098	7.7839	0.151067	7.69348	0.107575	7.71926	0.185008	0.3	0.26	0.04	0.9	-0.05	0.94	-0.17	0.72	-0.09	0.75	-0.06	0.86
AT1G12064		0	chr1	4077498	4078095	5.30488	0.104309	5.50435	0.111141	5.19718	0.211989	5.54732	0.114402	5.39826	0.164293	5.73423	0.808476	5.53316	0.255903	5.24097	0.0966928	5.38354	0.316107	0.2	0.29	-0.11	0.71	-0.15	0.76	0.19	0.91	-0.29	0.46	-0.15	0.81
AT1G12070	Immunoglobulin E-set superfamily protein	0	chr1	4078913	4080106	6.94434	0.276302	7.10953	0.15056	6.6856	0.112482	6.62007	0.376953	6.85536	0.42167	6.78745	0.283594	6.24801	0.444129	6.53629	0.166695	6.24731	0.245655	0.17	0.67	-0.26	0.45	0.24	0.87	0.17	0.85	0.29	0.69	0	1
AT_1_-_2_4081291-4081428		0	chr1	4081293	4081430	4.77313	0.220445	4.799	0.237357	4.50419	0.326211	5.24933	0.377395	4.93159	0.170876	4.89753	0.219364	4.93335	0.116254	4.87633	0.357129	4.78699	0.219262	0.03	0.96	-0.27	0.56	-0.32	0.75	-0.35	0.66	-0.06	0.93	-0.15	0.69
AT1G12080	Vacuolar calcium-binding protein-related	1	chr1	4084162	4085045	14.4508	0.0910823	14.3765	0.0709254	14.1574	0.097257	13.9919	0.192487	14.3555	0.0875066	14.1572	0.067591	13.0129	0.03579	13.4408	0.243971	13.5633	0.0758482	-0.07	0.59	-0.29	0.15	0.36	0.41	0.17	0.66	0.43	0.26	0.55	0.02
AT_1_+_1_4088717-4088947		1	chr1	4088719	4088949	4.79087	0.298555	5.03836	0.410106	4.78419	0.143613	4.67586	0.094468	4.74589	0.0553005	5.01298	0.151008	4.76766	0.234251	4.76823	0.230656	4.74329	0.0946035	0.25	0.69	-0.01	0.99	0.07	0.8	0.34	0.33	0	1	-0.02	0.96
AT1G12090	extensin-like protein	0	chr1	4089847	4090725	14.9908	0.137161	14.738	0.155478	14.792	0.105267	14.8785	0.302078	15.1617	0.347437	15.2647	0.108429	14.1356	0.0769317	14.5788	0.15502	14.7191	0.0850963	-0.25	0.31	-0.2	0.33	0.28	0.81	0.39	0.51	0.44	0.15	0.58	0.04
AT1G12100	Bifunctional inhibitor/lipid-transfer protein/seed storage 2S albumin superfamily protein	1	chr1	4095246	4095845	6.56051	0.123491	6.53488	0.229651	6.47367	0.0697515	6.40618	0.0520004	6.38009	0.112825	6.31207	0.0629796	5.88999	0.0963903	6.06968	0.0631136	6.06551	0.1628	-0.03	0.95	-0.09	0.6	-0.03	0.94	-0.09	0.53	0.18	0.3	0.18	0.51
AT_1_+_2_4103274-4103387		1	chr1	4103276	4103389	5.61393	0.101231	5.61286	0.123057	5.66772	0.255145	5.7235	0.328846	5.91207	0.463903	5.88966	0.463246	5.74628	0.123273	5.76113	0.188687	5.68284	0.181942	0	1	0.05	0.89	0.19	0.9	0.17	0.88	0.01	0.97	-0.06	0.85
AT1G12110	nitrate transporter 1.1	1	chr1	4105233	4109545	11.9417	0.234215	12.0424	0.0715928	11.7614	0.0885733	11.0771	0.202682	11.0763	0.275436	10.7846	0.0818536	10.1772	0.473901	9.8832	0.121663	9.99489	0.0592302	0.1	0.74	-0.18	0.53	0	1	-0.29	0.47	-0.29	0.69	-0.18	0.8
AT1G12120	Plant protein of unknown function (DUF863)	0	chr1	4114771	4117594	12.145	0.136033	12.1309	0.0855596	12.0689	0.0565056	12.2469	0.162154	12.2199	0.132422	12.2356	0.107611	12.0826	0.119138	12.1527	0.0896911	12.1179	0.158317	-0.01	0.96	-0.08	0.67	-0.03	0.97	-0.01	0.98	0.07	0.76	0.04	0.91
AT1G12130	Flavin-binding monooxygenase family protein	1	chr1	4118594	4120871	5.55473	0.136033	5.48514	0.14061	5.43787	0.136896	5.61335	0.151595	5.75116	0.262401	5.8026	0.202721	5.58086	0.20333	5.75299	0.213679	5.41976	0.094237	-0.07	0.78	-0.12	0.61	0.14	0.86	0.19	0.69	0.17	0.7	-0.16	0.62
AT1G12140	flavin-monooxygenase glucosinolate S-oxygenase 5	1	chr1	4121369	4124595	10.7844	0.116918	11.0977	0.138678	10.7661	0.169543	11.2797	0.0857717	11.2392	0.189126	11.2864	0.14614	11.4561	0.220028	11.4488	0.117859	11.4112	0.0923234	0.31	0.2	-0.02	0.95	-0.04	0.95	0.01	0.99	-0.01	0.99	-0.04	0.91
AT1G12150	Plant protein of unknown function (DUF827)	0	chr1	4123530	4125648	7.78893	0.248699	7.9963	0.163416	8.04739	0.0578368	8.02681	0.196158	7.83381	0.172559	8.08954	0.113783	7.99611	0.163956	7.81514	0.105581	7.95948	0.292506	0.21	0.56	0.26	0.39	-0.19	0.76	0.06	0.89	-0.18	0.53	-0.04	0.95
AT1G12160	Flavin-binding monooxygenase family protein	1	chr1	4126066	4128310	8.0096	0.11783	8.19827	0.0841577	7.80753	0.0746048	8.39195	0.0945563	8.3594	0.233419	8.42378	0.183093	8.18616	0.093701	8.4154	0.0816994	8.2416	0.140345	0.19	0.29	-0.2	0.25	-0.03	0.97	0.03	0.94	0.23	0.24	0.06	0.83
AT1G12170	F-box family protein	0	chr1	4128607	4129701	6.03221	0.159779	6.02685	0.219135	6.07599	0.0652962	6.11425	0.543918	6.27533	0.398515	6.12999	0.20381	5.95672	0.161237	6.17502	0.147625	6.1686	0.135032	-0.01	0.99	0.04	0.85	0.16	0.93	0.02	0.99	0.22	0.49	0.21	0.47
AT1G12180		1	chr1	4130421	4131137	4.87641	0.0705143	4.81869	0.393309	4.94883	0.276478	4.76208	0.310077	4.89829	0.382266	4.81821	0.344015	4.55747	0.31202	4.91878	0.362721	4.7739	0.272139	-0.06	0.92	0.07	0.85	0.14	0.92	0.06	0.96	0.36	0.61	0.22	0.73
AT1G12190	F-box and associated interaction domains-containing protein	0	chr1	4132967	4134094	5.3727	0.243508	5.46235	0.213981	5.37467	0.206713	5.66139	0.682882	5.44015	0.225093	5.44143	0.241076	5.32541	0.178856	5.59644	0.336767	5.34391	0.142334	0.09	0.84	0	1	-0.22	0.91	-0.22	0.87	0.27	0.64	0.02	0.97
AT1G12200	Flavin-binding monooxygenase family protein	1	chr1	4137533	4140028	12.7595	0.271576	13.022	0.167453	13.0723	0.2131	13.3861	0.194996	13.4857	0.203905	13.5007	0.224513	13.3141	0.255519	13.4719	0.305744	13.4588	0.127948	0.26	0.49	0.31	0.44	0.1	0.89	0.11	0.84	0.16	0.8	0.14	0.73
OMAT1P004260		1	chr1	4140410	4140634	6.96592	0.112799	7.01074	0.111082	6.75303	0.16354	7.06714	0.216394	6.80595	0.191076	6.9626	0.0725666	7.45234	0.190504	7.33713	0.302025	7.55754	0.131896	0.04	0.83	-0.21	0.36	-0.26	0.69	-0.1	0.8	-0.12	0.84	0.11	0.76
AT1G12210	RPS5-like 1	1	chr1	4140948	4143605	5.85195	0.0738263	5.94495	0.146838	5.73055	0.153253	5.96577	0.268965	5.84534	0.266118	5.96049	0.215982	6.17324	0.180038	6.09752	0.272284	6.26157	0.0308194	0.09	0.64	-0.12	0.54	-0.12	0.9	-0.01	1	-0.08	0.89	0.09	0.74
AT1G12211		0	chr1	4143866	4144114	4.67411	0.121113	4.51938	0.129474	4.63137	0.197419	4.7892	0.186243	4.84819	0.242659	4.60887	0.263216	4.63801	0.0751346	4.77422	0.125903	4.939	0.253999	-0.15	0.46	-0.04	0.9	0.06	0.95	-0.18	0.76	0.14	0.53	0.3	0.42
AT1G12220	Disease resistance protein (CC-NBS-LRR class) family	1	chr1	4144572	4147911	8.40361	0.140046	8.55506	0.227362	8.1627	0.117655	8.64794	0.171889	8.49088	0.141264	8.56806	0.16778	8.73873	0.0858225	8.55475	0.2444	8.33231	0.0886246	0.15	0.64	-0.24	0.28	-0.16	0.77	-0.08	0.86	-0.18	0.64	-0.41	0.09
AT1G12230	Aldolase superfamily protein	1	chr1	4147962	4151056	8.63753	0.0890685	8.78317	0.0477941	8.71477	0.0863452	8.75441	0.102893	8.87356	0.144028	8.75899	0.0381129	8.64479	0.10888	8.85533	0.0335395	8.6987	0.104388	0.15	0.25	0.08	0.59	0.12	0.79	0	0.99	0.21	0.24	0.05	0.82
AT1G12240	Glycosyl hydrolases family 32 protein	1	chr1	4153652	4157644	14.2017	0.101543	14.1008	0.157931	14.1675	0.0332966	13.8249	0.182363	13.9579	0.16609	13.926	0.189243	13.8332	0.154997	13.7805	0.164086	14.0131	0.2505	-0.1	0.66	-0.03	0.8	0.13	0.84	0.1	0.84	-0.05	0.89	0.18	0.68
AT1G12244	Polynucleotidyl transferase, ribonuclease H-like superfamily protein	1	chr1	4157654	4159046	7.6468	0.106262	7.67368	0.134985	7.60578	0.15011	7.63142	0.130337	7.57367	0.16066	7.74091	0.233293	7.59093	0.195655	7.59915	0.116938	7.62616	0.124509	0.03	0.92	-0.04	0.87	-0.06	0.92	0.11	0.82	0.01	0.99	0.04	0.93
AT1G12250	Pentapeptide repeat-containing protein	1	chr1	4159265	4161455	10.4625	0.145507	10.6836	0.0959792	10.4419	0.138827	10.4987	0.157745	10.5364	0.048195	10.5317	0.0358156	10.8285	0.097349	10.5879	0.0929448	10.3383	0.234473	0.22	0.3	-0.02	0.95	0.04	0.93	0.03	0.92	-0.24	0.25	-0.49	0.23
AT1G12260	NAC 007	0	chr1	4162832	4165852	8.73746	0.104601	8.90571	0.17297	8.89309	0.0779471	9.04395	0.248094	8.77009	0.120484	8.78307	0.13769	8.92632	0.211575	8.70634	0.0890515	8.58389	0.105864	0.17	0.48	0.16	0.32	-0.27	0.64	-0.26	0.62	-0.22	0.51	-0.34	0.33
AT_1_-_1_4169636-4169743		0	chr1	4169638	4169745	5.2925	0.126857	5.26319	0.0440402	5.28709	0.0635764	5.52611	0.32774	5.31774	0.257411	5.45357	0.179701	5.32269	0.212455	5.31501	0.154105	5.17956	0.0657558	-0.03	0.88	-0.01	0.98	-0.21	0.85	-0.07	0.93	-0.01	0.99	-0.14	0.66
AT1G12270	stress-inducible protein, putative	1	chr1	4172075	4174775	11.3768	0.0299994	11.0927	0.0397972	11.2789	0.103722	11.1522	0.194293	11.2493	0.0996834	11.2564	0.110434	10.9959	0.139702	11.1837	0.157646	11.1653	0.062417	-0.28	0.03	-0.1	0.43	0.1	0.86	0.1	0.8	0.19	0.54	0.17	0.43
AT1G12280	LRR and NB-ARC domains-containing disease resistance protein	0	chr1	4174875	4177559	7.90608	0.0394325	7.96353	0.068582	7.78104	0.153815	8.29611	0.273998	8.11754	0.272045	8.22902	0.185527	8.17507	0.0923117	7.81085	0.320009	7.94363	0.186027	0.06	0.54	-0.13	0.5	-0.18	0.86	-0.07	0.92	-0.36	0.45	-0.23	0.43
AT1G12290	Disease resistance protein (CC-NBS-LRR class) family	0	chr1	4178359	4182593	8.98754	0.124249	9.02789	0.157839	8.71767	0.134446	8.9495	0.0649418	9.04967	0.212956	8.93868	0.14188	9.0002	0.0883186	9.05442	0.261354	8.88196	0.120648	0.04	0.89	-0.27	0.25	0.1	0.86	-0.01	0.98	0.05	0.91	-0.12	0.58
AT1G12294	MIR472a; miRNA	0	chr1	4182132	4182299	5.472	0.0956247	5.46259	0.0850911	5.42657	0.217469	5.49585	0.148458	5.4532	0.271492	5.57779	0.426862	5.47123	0.154643	5.56629	0.2102	5.39497	0.352192	-0.01	0.96	-0.05	0.89	-0.04	0.96	0.08	0.93	0.1	0.81	-0.08	0.9
AT1G12300	Tetratricopeptide repeat (TPR)-like superfamily protein	0	chr1	4183066	4186124	7.79777	0.185384	7.87413	0.0526449	7.84017	0.135153	7.92907	0.29869	7.94794	0.0834226	7.97803	0.172116	7.81958	0.205808	7.77341	0.140629	7.89365	0.2618	0.08	0.75	0.04	0.9	0.02	0.98	0.05	0.95	-0.05	0.91	0.07	0.89
AT1G12310	Calcium-binding EF-hand family protein	0	chr1	4187165	4188056	9.72222	0.106108	9.74919	0.0587979	9.60966	0.0883862	10.0076	0.0958114	9.70114	0.157396	9.69843	0.0958402	9.83119	0.170728	9.48774	0.164293	9.58147	0.136847	0.03	0.87	-0.11	0.48	-0.31	0.42	-0.31	0.27	-0.34	0.33	-0.25	0.42
AT1G12320	Protein of unknown function (DUF1442)	1	chr1	4189355	4190342	9.35147	0.45041	9.32195	0.160814	9.1215	0.250898	9.85525	0.266823	9.68022	0.284084	9.39349	0.107538	9.08357	0.308143	9.00216	0.28477	8.99789	0.138552	-0.03	0.97	-0.23	0.72	-0.18	0.86	-0.46	0.4	-0.08	0.91	-0.09	0.87
AT_1_+_1_4191407-4191538		1	chr1	4191409	4191540	5.0458	0.115073	5.1696	0.0603834	5.23839	0.163777	5.18673	0.259393	5.1763	0.360701	5.0815	0.132253	4.91562	0.14561	5.51078	0.643797	5.2406	0.281411	0.12	0.42	0.19	0.41	-0.01	0.99	-0.11	0.85	0.6	0.54	0.32	0.47
AT_1_+_2_4192224-4192391		1	chr1	4192226	4192393	5.13151	0.20496	5.17846	0.204433	5.17741	0.0965346	5.40987	0.123618	5.32169	0.206921	5.35837	0.168439	5.3619	0.210646	5.23364	0.125473	5.37612	0.268149	0.05	0.91	0.05	0.89	-0.09	0.89	-0.05	0.9	-0.13	0.73	0.01	0.98
AT1G12330		1	chr1	4194658	4196749	7.67994	0.533088	7.46764	0.239989	7.37653	0.218872	7.95796	0.149199	7.91547	0.143128	8.06438	0.165453	7.40362	0.164424	7.00994	0.148008	7.36832	0.0429535	-0.21	0.78	-0.3	0.66	-0.04	0.94	0.11	0.8	-0.39	0.25	-0.04	0.9
AT1G12340	Cornichon family protein	1	chr1	4197396	4198310	9.88034	0.037267	9.8182	0.163758	9.61422	0.0937241	10.0204	0.0940427	10.0965	0.220413	9.98773	0.193308	9.83747	0.125168	10.0212	0.0784567	9.75324	0.107669	-0.06	0.77	-0.27	0.12	0.08	0.9	-0.03	0.94	0.18	0.39	-0.08	0.73
AT1G12350	4-phospho-panto-thenoylcysteine synthetase	1	chr1	4198413	4200802	10.4439	0.0937337	10.3849	0.0140017	10.3984	0.0445097	10.2287	0.0618563	10.4212	0.0845057	10.4189	0.0708436	10.378	0.0840964	10.4315	0.0305388	10.4288	0.0327384	-0.06	0.6	-0.05	0.72	0.19	0.38	0.19	0.31	0.05	0.69	0.05	0.7
AT1G12360	Sec1/munc18-like (SM) proteins superfamily	1	chr1	4200876	4206404	11.7516	0.113513	11.4696	0.088448	11.5768	0.136294	11.5458	0.2646	11.7622	0.222188	11.7581	0.221921	11.5047	0.160724	11.7581	0.094676	11.5925	0.128294	-0.28	0.16	-0.17	0.4	0.22	0.8	0.21	0.74	0.25	0.35	0.09	0.77
AT1G12370	photolyase 1	0	chr1	4206374	4208951	8.81035	0.118209	8.96375	0.121519	8.82979	0.102524	8.55508	0.25361	8.30721	0.146809	8.40332	0.237725	9.37673	0.103063	8.88041	0.235792	9.14111	0.165685	0.15	0.45	0.02	0.93	-0.25	0.71	-0.15	0.81	-0.5	0.23	-0.24	0.4
AT1G12380		0	chr1	4214262	4217132	7.93191	0.290076	8.07345	0.134	7.97806	0.0650447	8.52864	0.246259	8.22091	0.416	8.43608	0.194772	8.33698	0.168643	8.3038	0.186353	8.79437	0.17248	0.14	0.72	0.05	0.92	-0.31	0.8	-0.09	0.88	-0.03	0.94	0.46	0.24
AT1G12390	Cornichon family protein	1	chr1	4220100	4221774	10.1362	0.0531563	10.0198	0.110079	9.94513	0.0553348	10.1854	0.0960106	10.3057	0.126143	10.1292	0.111396	10.0619	0.079317	10.1808	0.105883	9.96977	0.0361389	-0.12	0.42	-0.19	0.13	0.12	0.75	-0.06	0.84	0.12	0.54	-0.09	0.45
AT1G12400	Nucleotide excision repair, TFIIH, subunit TTDA	1	chr1	4221863	4222837	9.87202	0.147252	10.0015	0.0808245	9.83945	0.0660104	10.18	0.117041	10.3249	0.0887431	10.3107	0.088688	10.5322	0.135726	10.7644	0.0684197	10.6493	0.0661292	0.13	0.51	-0.03	0.89	0.14	0.65	0.13	0.63	0.23	0.31	0.12	0.59
AT1G12410	CLP protease proteolytic subunit 2	1	chr1	4223030	4225124	8.74338	0.0591013	8.63928	0.100366	8.61513	0.0884061	8.95228	0.149387	9.1044	0.139855	9.08303	0.112239	9.57912	0.125221	9.65941	0.141261	9.51048	0.106503	-0.1	0.45	-0.13	0.32	0.15	0.76	0.13	0.71	0.08	0.78	-0.07	0.78
AT1G12411		0	chr1	4225321	4225482	5.54909	0.106068	5.61908	0.181246	5.66683	0.0902739	5.65435	0.339683	5.66192	0.191552	5.89006	0.224131	5.57258	0.164493	5.64095	0.338303	5.50263	0.181864	0.07	0.8	0.12	0.46	0.01	1	0.24	0.76	0.07	0.91	-0.07	0.86
AT1G12420	ACT domain repeat 8	0	chr1	4226362	4229138	7.90013	0.103943	8.12275	0.153059	8.12526	0.0576842	8.72499	0.0873211	8.46057	0.340192	8.43903	0.205639	8.8082	0.172461	8.51188	0.1013	8.6113	0.282294	0.22	0.32	0.23	0.18	-0.26	0.75	-0.29	0.49	-0.3	0.32	-0.2	0.69
AT_1_-_1_4229690-4229824		0	chr1	4229692	4229826	6.3519	0.0973276	6.41623	0.228886	6.48952	0.216704	6.88302	0.301711	6.92768	0.319481	6.82202	0.263237	6.89515	0.363794	6.85062	0.353683	6.97719	0.230706	0.06	0.85	0.14	0.62	0.04	0.97	-0.06	0.94	-0.04	0.96	0.08	0.91
AT1G12423		0	chr1	4231027	4231146	5.46677	0.0578079	5.50094	0.120097	5.4657	0.143173	5.74533	0.100934	5.877	0.179597	5.62763	0.182304	5.75518	0.0756344	5.49666	0.174235	5.88511	0.28084	0.03	0.85	0	1	0.13	0.8	-0.12	0.76	-0.26	0.35	0.13	0.76
AT1G12430	armadillo repeat kinesin 3	0	chr1	4233873	4238764	8.23686	0.137043	8.28269	0.124871	8.24982	0.14958	8.33798	0.104934	8.04811	0.163349	8.1907	0.294637	9.09553	0.233087	8.69057	0.186658	8.8124	0.0336196	0.05	0.86	0.01	0.97	-0.29	0.47	-0.15	0.8	-0.4	0.36	-0.28	0.4
CUFF.6021		0	chr1	4240633	4241138	5.1169	0.246024	4.95605	0.383075	5.00139	0.252642	5.24671	0.186829	5.20982	0.215835	5.47541	0.221754	5.2823	0.19262	5.16845	0.207395	5.19134	0.19243	-0.16	0.79	-0.12	0.8	-0.04	0.97	0.23	0.67	-0.11	0.79	-0.09	0.83
AT1G12440	A20/AN1-like zinc finger family protein	0	chr1	4241592	4243008	14.5021	0.17931	14.2536	0.0692385	14.0906	0.0803207	14.6958	0.0809759	14.4779	0.062465	14.5139	0.181764	14.9567	0.0702204	14.5819	0.0857571	14.485	0.14182	-0.25	0.29	-0.41	0.16	-0.22	0.31	-0.18	0.62	-0.37	0.11	-0.47	0.11
AT1G12450	SNARE associated Golgi protein family	1	chr1	4244308	4245993	8.59876	0.267957	8.38771	0.0869065	8.37318	0.0375708	8.60889	0.230281	8.81901	0.222086	8.69657	0.235742	8.52319	0.242464	8.76256	0.217894	8.42809	0.135471	-0.21	0.53	-0.23	0.47	0.21	0.79	0.09	0.89	0.24	0.62	-0.1	0.82
AT1G12451		0	chr1	4246109	4246291	5.59034	0.0679544	5.57497	0.182244	5.65251	0.100169	5.92664	0.233307	6.0704	0.141797	5.91314	0.297408	6.03523	0.161272	5.94007	0.197731	5.85938	0.130875	-0.02	0.96	0.06	0.67	0.14	0.84	-0.01	0.99	-0.1	0.81	-0.18	0.56
AT1G12460	Leucine-rich repeat protein kinase family protein	1	chr1	4247249	4250630	8.43117	0.290929	8.63462	0.0705592	8.52041	0.0915518	8.52931	0.151152	8.42154	0.143448	8.41694	0.108105	8.23851	0.0995061	7.92522	0.108424	8.19023	0.30603	0.2	0.57	0.09	0.82	-0.11	0.84	-0.11	0.75	-0.31	0.2	-0.05	0.93
AT1G12470	zinc ion binding	1	chr1	4251032	4257392	10.3362	0.164383	10.2906	0.0540928	10.3281	0.126894	10.2977	0.232896	10.3326	0.2182	10.4016	0.131057	10.299	0.114183	10.479	0.144224	10.386	0.186385	-0.05	0.85	-0.01	0.98	0.03	0.97	0.1	0.83	0.18	0.5	0.09	0.79
AT1G12480	C4-dicarboxylate transporter/malic acid transport protein	0	chr1	4257268	4259300	5.52734	0.119308	5.7871	0.109139	5.64123	0.14804	5.44952	0.314711	5.4671	0.0645271	5.50765	0.104696	8.32397	0.218	8.51602	0.111847	8.21626	0.173743	0.26	0.22	0.11	0.61	0.02	0.99	0.06	0.93	0.19	0.6	-0.11	0.8
AT1G12490	F-box associated ubiquitination effector family protein	1	chr1	4260783	4261869	5.7364	0.128317	5.51673	0.166018	5.74315	0.181262	5.49638	0.352582	5.2987	0.178605	5.35467	0.265018	5.39545	0.25427	5.42108	0.261498	5.52754	0.189555	-0.22	0.38	0.01	0.98	-0.2	0.85	-0.14	0.87	0.03	0.97	0.13	0.78
AT1G12500	Nucleotide-sugar transporter family protein	0	chr1	4263150	4265044	9.28072	0.193559	9.6835	0.1008	9.7087	0.118584	9.6695	0.150736	9.45334	0.156915	9.58593	0.193364	9.56656	0.139114	9.26696	0.119749	9.54772	0.112809	0.4	0.18	0.43	0.18	-0.22	0.64	-0.08	0.86	-0.3	0.28	-0.02	0.95
AT1G12520	copper chaperone for SOD1	0	chr1	4267106	4268926	9.02742	0.0983872	8.91516	0.107566	9.03678	0.0884456	8.63163	0.422756	8.76423	0.46322	8.95778	0.154368	8.63363	0.166041	8.88857	0.144027	8.84221	0.0960223	-0.11	0.51	0.01	0.96	0.13	0.94	0.33	0.7	0.25	0.42	0.21	0.44
AT1G12530		0	chr1	4268986	4270787	12.0797	0.0975728	11.7904	0.0209118	11.9397	0.0463035	11.84	0.176019	12.0494	0.143805	12.0757	0.134701	11.8976	0.153192	12.1965	0.0770489	12.1381	0.141812	-0.29	0.09	-0.14	0.29	0.21	0.68	0.24	0.56	0.3	0.26	0.24	0.41
AT1G12540	basic helix-loop-helix (bHLH) DNA-binding superfamily protein	1	chr1	4272960	4274206	4.57023	0.298133	4.50434	0.242707	4.51614	0.206689	4.55692	0.272402	4.50546	0.337182	4.69185	0.436588	4.71791	0.312729	4.32559	0.241918	4.34606	0.170377	-0.07	0.91	-0.05	0.92	-0.05	0.97	0.13	0.89	-0.39	0.49	-0.37	0.46
AT1G12550	D-isomer specific 2-hydroxyacid dehydrogenase family protein	1	chr1	4274594	4275981	8.49661	0.0942737	8.42214	0.236298	8.21142	0.179436	8.41648	0.228653	8.32648	0.136696	8.27061	0.166082	8.46461	0.195552	8.46729	0.285964	8.44058	0.277224	-0.07	0.83	-0.29	0.26	-0.09	0.9	-0.15	0.78	0	1	-0.02	0.97
AT1G12560	expansin A7	1	chr1	4276519	4277899	12.2283	0.374328	12.3814	0.114674	12.4743	0.140318	12.048	0.185038	11.9292	0.136082	12.1216	0.129003	12.0986	0.113539	12.0879	0.137026	12.1335	0.266462	0.15	0.76	0.25	0.6	-0.12	0.84	0.07	0.86	-0.01	0.97	0.03	0.95
AT1G12570	Glucose-methanol-choline (GMC) oxidoreductase family protein	0	chr1	4277993	4280862	5.26105	0.190298	5.47053	0.180794	5.46305	0.0837635	5.35604	0.252183	5.52389	0.057706	5.50463	0.156763	5.29914	0.227362	5.28866	0.120953	5.72445	0.508011	0.21	0.5	0.2	0.41	0.17	0.8	0.15	0.79	-0.01	0.98	0.43	0.6
AT1G12580	phosphoenolpyruvate carboxylase-related kinase 1	1	chr1	4282899	4285829	11.0457	0.147518	10.8926	0.0980546	10.8117	0.0973701	11.0237	0.0311654	11.0982	0.115832	11.0044	0.178832	10.6424	0.12739	10.6815	0.136392	10.6297	0.0971798	-0.15	0.47	-0.23	0.28	0.07	0.81	-0.02	0.96	0.04	0.9	-0.01	0.97
AT1G12600	UDP-N-acetylglucosamine (UAA) transporter family	0	chr1	4286204	4288878	6.16538	0.087542	6.11818	0.109029	5.91719	0.216112	6.08682	0.261889	6.59727	0.26013	6.28671	0.171031	5.95741	0.291813	6.19977	0.164616	6.01747	0.172519	-0.05	0.8	-0.25	0.36	0.51	0.5	0.2	0.73	0.24	0.63	0.06	0.92
AT1G12610	Integrase-type DNA-binding superfamily protein	0	chr1	4289944	4291017	5.29955	0.282363	5.38272	0.168277	5.24044	0.364963	5.16228	0.201895	4.98403	0.225684	5.37349	0.138008	4.94887	0.314638	4.9397	0.282843	4.96709	0.324021	0.08	0.85	-0.06	0.93	-0.18	0.82	0.21	0.64	-0.01	0.99	0.02	0.98
AT1G12620	Pentatricopeptide repeat (PPR) superfamily protein	0	chr1	4294594	4297084	6.82601	0.212363	6.95194	0.0845457	6.73664	0.162495	7.0719	0.137492	6.97662	0.231542	6.81072	0.297383	6.92132	0.284496	7.11443	0.22778	7.01102	0.115091	0.13	0.65	-0.09	0.8	-0.1	0.89	-0.26	0.67	0.19	0.73	0.09	0.85
AT1G12630	Integrase-type DNA-binding superfamily protein	1	chr1	4298889	4299475	5.40979	0.16358	5.14583	0.130233	5.24797	0.369031	5.24001	0.257195	5.2951	0.312413	5.34981	0.0839337	5.27327	0.162229	5.06623	0.257127	5.32767	0.142771	-0.26	0.3	-0.16	0.75	0.06	0.96	0.11	0.83	-0.21	0.65	0.05	0.87
AT_1_-_1_4302356-4302469		0	chr1	4302358	4302471	4.95405	0.15675	4.8625	0.208818	5.15292	0.262697	5.15222	0.303044	5.20748	0.114672	5.24204	0.386689	5.06625	0.202051	5.38264	0.382145	5.32874	0.207923	-0.09	0.79	0.2	0.58	0.06	0.95	0.09	0.93	0.32	0.63	0.26	0.52
AT1G12640	MBOAT (membrane bound O-acyl transferase) family protein	0	chr1	4303312	4305798	10.7353	0.0831116	10.6208	0.0944515	10.6171	0.0958975	10.9751	0.0565021	11.2064	0.150737	11.1633	0.0894641	11.0521	0.174559	11.1423	0.144941	10.9929	0.113826	-0.11	0.44	-0.12	0.42	0.23	0.48	0.19	0.36	0.09	0.79	-0.06	0.86
AT1G12650		1	chr1	4305933	4308005	11.5181	0.0292956	11.442	0.0539492	11.498	0.0720435	11.444	0.17369	11.6114	0.174175	11.5971	0.0799789	11.3423	0.1079	11.5059	0.117447	11.5124	0.114662	-0.08	0.31	-0.02	0.85	0.17	0.78	0.15	0.66	0.16	0.48	0.17	0.44
AT1G12660		1	chr1	4308943	4309583	5.72084	0.0625783	5.73865	0.0561338	5.47282	0.115986	6.00252	0.52094	5.8668	0.257115	5.41998	0.247349	5.65437	0.271003	5.61235	0.260694	6.26834	1.35365	0.02	0.88	-0.25	0.18	-0.14	0.93	-0.58	0.58	-0.04	0.95	0.61	0.77
AT1G12663		1	chr1	4310969	4311457	5.27945	0.147416	5.02604	0.147242	4.93423	0.167617	4.93188	0.213538	5.08178	0.285186	4.99917	0.147569	5.01637	0.149798	5.0825	0.132234	5.16742	0.163832	-0.25	0.32	-0.35	0.23	0.15	0.87	0.07	0.89	0.07	0.83	0.15	0.64
AT1G12665		1	chr1	4312331	4312935	4.9997	0.222264	5.03483	0.139511	5.0903	0.192999	5.15093	0.188082	4.84541	0.230248	5.07363	0.123804	4.79485	0.237212	5.00654	0.256307	5.13323	0.118756	0.04	0.93	0.09	0.81	-0.31	0.63	-0.08	0.86	0.21	0.69	0.34	0.37
AT1G12667		1	chr1	4313858	4314204	4.85287	0.109568	5.5055	0.751482	4.74933	0.329545	5.00415	0.162874	4.88383	0.110419	4.65753	0.163582	4.56445	0.162067	4.99585	0.181147	4.78729	0.188587	0.65	0.47	-0.1	0.82	-0.12	0.81	-0.35	0.43	0.43	0.26	0.22	0.53
AT1G12669		1	chr1	4315466	4315987	5.64059	0.131422	5.76338	0.221345	5.7388	0.124335	5.83155	0.252614	5.85151	0.201076	5.77879	0.237129	5.59685	0.372101	5.54626	0.594461	5.80476	0.15768	0.12	0.7	0.1	0.65	0.02	0.98	-0.05	0.94	-0.05	0.97	0.21	0.73
AT1G12670		1	chr1	4316701	4317005	5.67664	0.177942	5.69508	0.204866	5.58767	0.183209	5.61379	0.151487	5.57166	0.235164	5.70434	0.138062	5.58248	0.230723	5.55233	0.165033	5.72877	0.176927	0.02	0.97	-0.09	0.78	-0.04	0.96	0.09	0.81	-0.03	0.95	0.15	0.74
AT1G12672		1	chr1	4318309	4319090	5.29954	0.152285	5.19831	0.167912	5.27509	0.196465	5.50513	0.169051	5.62397	0.171886	5.73658	0.432922	5.56375	0.228708	5.65042	0.300618	5.43017	0.200423	-0.1	0.72	-0.02	0.95	0.12	0.85	0.23	0.79	0.09	0.89	-0.13	0.77
AT1G12680	phosphoenolpyruvate carboxylase-related kinase 2	0	chr1	4319886	4322945	9.39608	0.112735	9.51973	0.0986888	9.47528	0.0533677	9.64573	0.069672	9.66538	0.0839581	9.69846	0.130287	9.72004	0.117755	9.73957	0.205142	9.57954	0.161566	0.12	0.49	0.08	0.59	0.02	0.95	0.05	0.85	0.02	0.96	-0.14	0.63
AT1G12700	ATP binding;nucleic acid binding;helicases	0	chr1	4323556	4326333	7.89679	0.110906	8.03153	0.131918	7.90847	0.0541705	8.01062	0.145441	7.97924	0.182251	8.02245	0.134634	7.92913	0.211995	7.81873	0.0448164	7.81836	0.202476	0.13	0.51	0.01	0.95	-0.03	0.96	0.01	0.98	-0.11	0.74	-0.11	0.8
[truncated: 35,556 more rows]
